# Supplementary material for: A model of aerosol evaporation kinetics in a thermodenuder
Source: Copernicus journal article supplement (doi:10.5194/amt-3-579-2010), 2010-05-11
Supplement: Supplementary file 1 [file amt-3-579-2010-supplement.zip]

Archive with 21 entries (21 files):
- Figure 10 Data.txt
- Figure 11 Data.txt
- Figure 12 Data-1.txt
- Figure 12 Data-2.txt
- Figure 2 Data.txt
- Figure 3 Data.txt
- Figure 4 Data.txt
- Figure 5 data.txt
- Figure 6a Data.txt
- Figure 6b Data.txt
- Figure 6c Data.txt
- Figure 6d Data.txt
- Figure 6e Data.txt
- Figure 6f Data.txt
- Figure 7 Data.txt
- Figure 8a Data.txt
- Figure 8b Data.txt
- Figure 8c Data.txt
- Figure 8d Data.txt
- Figure 9 Data.txt
- Supplemental Material Text.pdf
