# Supplementary material for: A model of aerosol evaporation kinetics in a thermodenuder
Source: Copernicus journal article supplement (doi:10.5194/amt-3-579-2010), 2010-05-11
Supplement: Supplementary file 1 [file amt-3-579-2010-supplement.zip › Figure 2 Data.txt]

T_But_Exp	MFR_But_Exp	T_Hex_Exp	MFR_Hex_Exp	T_Dec_Exp	MFR_Dec_Exp	Td	MFR_But_Cappa	MFR_But_Chat	MFR_But_Mean	MFR_Hex_Cappa	MFR_Hex_Chat	MFR_Hex_mean	MFR_Dec_Cappa	MFR_Dec_Chat	MFR_Dec_mean
25.9259	0.961538	30.0285	0.968531	40.2849	0.996503	25	0.983605428614842	0.930210994030441	0.966307331927353	0.998489693359039	0.980905618810686	0.994612688208548	0.999987936490656	0.998780162926029	0.999878930363844
30	0.982	40.5128	0.923077	50.7692	0.940559	30	0.973693299759183	0.89172221715004	0.946810871575314	0.997362393302397	0.966505197649787	0.990561800642534	0.999974383824909	0.997804510042266	0.999763898752011
40.2849	0.835664	50.5413	0.706294	61.7094	0.814685	35	0.952038795489187	0.812782578746095	0.905378260648525	0.994602066590847	0.931156954681933	0.980605888278903	0.999932815737063	0.995399100669559	0.999448065996036
43.2479	0.772727	53.2764	0.643357	66.9516	0.685315	40	0.905979048617522	0.657943327049201	0.819856780555052	0.988036871024725	0.847197624573741	0.956851291460918	0.999809846557592	0.989640092586546	0.998608743463279
45.5271	0.674825	56.2393	0.541958	69.9145	0.608392	45	0.810845383157202	0.399186118057133	0.651005095970744	0.972857254487786	0.657319697969398	0.901839157220541	0.999458534912156	0.976240406295838	0.996447461832848
48.2621	0.559441	58.7464	0.405594	72.6496	0.531469	50	0.623630002084123	0.0926066499340452	0.371555485474505	0.938718453611057	0.313430448317031	0.778753428265345	0.998487833863171	0.945927712214589	0.991048210212406
50.7692	0.458042	61.7094	0.293706	75.3846	0.423077	55	0.324723966079983	0	0.0676742194679485	0.864112167671176	0.0120170353527283	0.524520008792039	0.995890088831484	0.879332443763464	0.977948756293233
53.5043	0.363636	64.4444	0.20979	78.1197	0.269231	60	0.0389211628059785	0	0	0.707230388621052	0	0.163969130577687	0.98914819878597	0.738494008956034	0.947068287808834
56.2393	0.269231	67.1795	0.129371	80.6268	0.167832	65	0	0	0	0.421219205222552	0	0	0.972163790023737	0.47200037976765	0.876436648834115
59.2023	0.157343	72.6496	0.0524476	84.0456	0.0979021	70	0	0	0	0.0877852898781344	0	0	0.930629379159774	0.136297376218653	0.721420108978849
61.4815	0.108392	83.5897	0.0314685	95.2137	0.0034965	75	0	0	0	0	0	0	0.832392367316147	0	0.427365069807156
72.6496	0.00699301					80	0	0	0	0	0	0	0.613811353081032	0	0.0841399003416189
						85	0	0	0	0	0	0	0.252217906957347	0	0
						90	0	0	0	0	0	0	0.00248502680184526	0	0
						95	0	0	0	0	0	0	0	0	0
						100	0	0	0	0	0	0	0	0	0
