# Supplementary material for: A model of aerosol evaporation kinetics in a thermodenuder
Source: Copernicus journal article supplement (doi:10.5194/amt-3-579-2010), 2010-05-11
Supplement: Supplementary file 1 [file amt-3-579-2010-supplement.zip › Figure 3 Data.txt]

Td	MFR_Profile	MFR_constant
25	0.948655570733308	0.973864327967093
30	0.923302601536315	0.953694088978768
35	0.878912871357297	0.918131531849535
40	0.802516612966751	0.856097999888318
45	0.675206767528625	0.749387947691142
50	0.481778423090041	0.569761171738292
55	0.252539035826089	0.285337276704208
60	0.0592373919948037	0
65	0	0
70	0	0
