# Supplementary material for: A model of aerosol evaporation kinetics in a thermodenuder
Source: Copernicus journal article supplement (doi:10.5194/amt-3-579-2010), 2010-05-11
Supplement: Supplementary file 1 [file amt-3-579-2010-supplement.zip › Figure 4 Data.txt]

Csat	Dp	MFR_dp_low_loading	ResidenceTime	MFR_Csat	MFR_dp_high_loading	MFR_Time
0.01	100	0.781603841557331	1	0.999911926084597	0.817627317819461	0.995347612086384
0.1	200	0.914461590795578	5	0.999137086053199	0.920859460683816	0.967392632931208
1	300	0.955244095317994	10	0.991397414732991	0.95708599207177	0.928857845192071
10	400	0.972659274784269	15	0.91660459700203	0.973362216236558	0.889914511438229
50	500	0.981618567837459	20	0.644106792692659	0.98194005921549	0.851629427506231
100			25	0.443689952570285		0.814490238253232
500			30	0.0546222875779058		0.778553609079323
1000				0.00293385981407772		
