# Supplementary material for: A model of aerosol evaporation kinetics in a thermodenuder
Source: Copernicus journal article supplement (doi:10.5194/amt-3-579-2010), 2010-05-11
Supplement: Supplementary file 1 [file amt-3-579-2010-supplement.zip › Figure 5 data.txt]

Td	MFR_10_Absorbent	MFR_10_NoLoss	MFR_100_NoLoss	MFR_100_Absorbent	MFR_500_Absorbent	MFR_500_NoLoss	MFR_10_Eqm	MFR_100_Eqm	MFR_500_Eqm
25	1	1	1	1	1	1	1	1	1
28	0.945481488178033	0.950397060060627	0.988269568059988	0.975524293130205	0.997280263829686	0.999867952286211	0.946648293368639	0.976020198773687	0.997318989599711
31	0.875187499381387	0.885783192800473	0.972179675221551	0.942611678003931	0.99369088242402	0.999691148383117	0.877603173392792	0.943721272991795	0.993780476233141
34	0.786433167853847	0.802947096449843	0.950020937650897	0.898534883738707	0.98891010561657	0.999452864509654	0.789917216363114	0.900360281979111	0.989066656104844
37	0.678361816455715	0.699647294222604	0.919373795914779	0.840000088362614	0.982513915808865	0.999130747819417	0.682104977971773	0.842559311506825	0.982758199528475
40	0.554941132544785	0.576850189522407	0.876673299126477	0.763288098531358	0.973913456276138	0.998693684545321	0.55679257028188	0.766348209496872	0.974271855722908
43	0.430042154810169	0.444024865376191	0.81639138224965	0.665091310347227	0.962274539983359	0.998097423352766	0.426297629082725	0.667751123992164	0.962779615504272
46	0.30819770767375	0.319628647958175	0.729293687163057	0.545763060128734	0.946376438819176	0.997277154753935	0.305334259911417	0.545409109582197	0.947066220863483
49	0.190849245570162	0.198912443684377	0.560168506061989	0.416705271318709	0.924343994556164	0.996133432111075	0.188623648076219	0.410878784520503	0.925257216410022
52	0.0950373134995582	0.100089622122334	0.420419843032704	0.277260828242473	0.893046693479676	0.994501212276552	0.094198014970257	0.273784496934707	0.894204964722872
55	0.0304150896951913	0.0326383344381692	0.237305540735026	0.149449310949963	0.846414929892317	0.992065305603671	0.0303744607807648	0.147211347457151	0.847754106162497
58	0.00282346527640338	0.00327967681254654	0.0926305099124456	0.0527444780612793	0.768527721156633	0.988017497373297	0.00293434521203238	0.0521722615464922	0.769518230033465
61	0	0	0.0105652667602365	0.00547056454938719	0.603993541679658	0.9499559487526	0	0.00549443579116006	0.592090065636234
64	0	0	0	0	0.377031626380772	0.804018842495479	0	0	0.366775963930082
67	0	0	0	0	0.126275972276528	0.264126895339304	0	0	0.121374056658527
70	0	0	0	0	0	0	0	0	0
