# Supplementary material for: A model of aerosol evaporation kinetics in a thermodenuder
Source: Copernicus journal article supplement (doi:10.5194/amt-3-579-2010), 2010-05-11
Supplement: Supplementary file 1 [file amt-3-579-2010-supplement.zip › Figure 6a Data.txt]

Distance
0
0.0523885021010821
0.104777004202164
0.157165506303246
0.209554008404328
0.26194251050541
0.314331012606492
0.366719514707574
0.419108016808657
0.471496518909739
0.523885021010821
0.576273523111903
0.628662025212985
0.681050527314067
0.733439029415149
0.785827531516231
0.838216033617313
0.890604535718395
0.942993037819477
0.995381539920559
1.04777004202164
1.10015854412272
1.15254704622381
1.20493554832489
1.25732405042597
1.30971255252705
1.36210105462813
1.41448955672922
1.4668780588303
1.51926656093138
1.57165506303246
1.62404356513354
1.67643206723463
1.72882056933571
1.78120907143679
1.83359757353787
1.88598607563895
1.93837457774004
1.99076307984112
2.0431515819422
2.09554008404328
2.14792858614436
2.20031708824545
2.25270559034653
2.30509409244761
2.35748259454869
2.40987109664978
2.46225959875086
2.51464810085194
2.56703660295302
2.6194251050541
2.67181360715519
2.72420210925627
2.77659061135735
2.82897911345843
2.88136761555951
2.9337561176606
2.98614461976168
3.03853312186276
3.09092162396384
3.14331012606492
3.19569862816601
3.24808713026709
3.30047563236817
3.35286413446925
3.40525263657033
3.45764113867142
3.5100296407725
3.56241814287358
3.61480664497466
3.66719514707574
3.71958364917683
3.77197215127791
3.82436065337899
3.87674915548007
3.92913765758115
3.98152615968224
4.03391466178332
4.0863031638844
4.13869166598548
4.19108016808657
4.24346867018765
4.29585717228873
4.34824567438981
4.40063417649089
4.45302267859198
4.50541118069306
4.55779968279414
4.61018818489522
4.6625766869963
4.71496518909739
4.76735369119847
4.81974219329955
4.87213069540063
4.92451919750171
4.9769076996028
5.02929620170388
5.08168470380496
5.13407320590604
5.18646170800712
5.23885021010821
5.29123871220929
5.34362721431037
5.39601571641145
5.44840421851254
5.50079272061362
5.5531812227147
5.60556972481578
5.65795822691686
5.71034672901795
5.76273523111903
5.81512373322011
5.86751223532119
5.91990073742227
5.97228923952336
6.02467774162444
6.07706624372552
6.1294547458266
6.18184324792768
6.23423175002877
6.28662025212985
6.33900875423093
6.39139725633201
6.44378575843309
6.49617426053418
6.54856276263526
6.60095126473634
6.65333976683742
6.7057282689385
6.75811677103959
6.81050527314067
6.86289377524175
6.91528227734283
6.96767077944391
7.020059281545
7.07244778364608
7.12483628574716
7.17722478784824
7.22961328994933
7.28200179205041
7.33439029415149
7.38677879625257
7.43916729835365
7.49155580045474
7.54394430255582
7.5963328046569
7.64872130675798
7.70110980885906
7.75349831096015
7.80588681306123
7.85827531516231
7.91066381726339
7.96305231936447
8.01544082146556
8.06782932356664
8.12021782566772
8.1726063277688
8.22499482986989
8.27738333197097
8.32977183407205
8.38216033617313
8.43454883827421
8.4869373403753
8.53932584247638
8.59171434457746
8.64410284667854
8.69649134877962
8.74887985088071
8.80126835298179
8.85365685508287
8.90604535718395
8.95843385928503
9.01082236138611
9.0632108634872
9.11559936558828
9.16798786768936
9.22037636979044
9.27276487189152
9.32515337399261
9.37754187609369
9.42993037819477
9.48231888029585
9.53470738239694
9.58709588449802
9.6394843865991
9.69187288870018
9.74426139080126
9.79664989290235
9.84903839500343
9.90142689710451
9.95381539920559
10.0062039013067
10.0585924034078
10.1109809055088
10.1633694076099
10.215757909711
10.2681464118121
10.3205349139132
10.3729234160142
10.4253119181153
10.4777004202164
10.5300889223175
10.5824774244186
10.6348659265197
10.6872544286207
10.7396429307218
10.7920314328229
10.844419934924
10.8968084370251
10.9491969391262
11.0015854412272
11.0539739433283
11.1063624454294
11.1587509475305
11.2111394496316
11.2635279517326
11.3159164538337
11.3683049559348
11.4206934580359
11.473081960137
11.5254704622381
11.5778589643391
11.6302474664402
11.6826359685413
11.7350244706424
11.7874129727435
11.8398014748445
11.8921899769456
11.9445784790467
11.9969669811478
12.0493554832489
12.10174398535
12.154132487451
12.2065209895521
12.2589094916532
12.3112979937543
12.3636864958554
12.4160749979564
12.4684635000575
12.5208520021586
12.5732405042597
12.6256290063608
12.6780175084619
12.7304060105629
12.782794512664
12.8351830147651
12.8875715168662
12.9399600189673
12.9923485210684
13.0447370231694
13.0971255252705
13.1495140273716
13.2019025294727
13.2542910315738
13.3066795336748
13.3590680357759
13.411456537877
13.4638450399781
13.5162335420792
13.5686220441803
13.6210105462813
13.6733990483824
13.7257875504835
13.7781760525846
13.8305645546857
13.8829530567867
13.9353415588878
13.9877300609889
14.04011856309
14.0925070651911
14.1448955672922
14.1972840693932
14.2496725714943
14.3020610735954
14.3544495756965
14.4068380777976
14.4592265798987
14.5116150819997
14.5640035841008
14.6163920862019
14.668780588303
14.7211690904041
14.7735575925051
14.8259460946062
14.8783345967073
14.9307230988084
14.9831116009095
15.0355001030106
15.0878886051116
15.1402771072127
15.1926656093138
15.2450541114149
15.297442613516
15.349831115617
15.4022196177181
15.4546081198192
15.5069966219203
15.5593851240214
15.6117736261225
15.6641621282235
15.7165506303246
15.7689391324257
15.8213276345268
15.8737161366279
15.9261046387289
15.97849314083
16.0308816429311
16.0832701450322
16.1356586471333
16.1880471492344
16.2404356513354
16.2928241534365
16.3452126555376
16.3976011576387
16.4499896597398
16.5023781618408
16.5547666639419
16.607155166043
16.6595436681441
16.7119321702452
16.7643206723463
16.8167091744473
16.8690976765484
16.9214861786495
16.9738746807506
17.0262631828517
17.0786516849528
17.1310401870538
17.1834286891549
17.235817191256
17.2882056933571
17.3405941954582
17.3929826975592
17.4453711996603
17.4977597017614
17.5501482038625
17.6025367059636
17.6549252080647
17.7073137101657
17.7597022122668
17.8120907143679
17.864479216469
17.9168677185701
17.9692562206711
18.0216447227722
18.0740332248733
18.1264217269744
18.1788102290755
18.2311987311766
18.2835872332776
18.3359757353787
18.3883642374798
18.4407527395809
18.493141241682
18.545529743783
18.5979182458841
18.6503067479852
18.7026952500863
18.7550837521874
18.8074722542885
18.8598607563895
18.9122492584906
18.9646377605917
19.0170262626928
19.0694147647939
19.121803266895
19.174191768996
19.2265802710971
19.2789687731982
19.3313572752993
19.3837457774004
19.4361342795014
19.4885227816025
19.5409112837036
19.5932997858047
19.6456882879058
19.6980767900069
19.7504652921079
19.802853794209
19.8552422963101
19.9076307984112
19.9600193005123
20.0124078026133
20.0647963047144
20.1171848068155
20.1695733089166
20.2219618110177
20.2743503131188
20.3267388152198
20.3791273173209
20.431515819422
20.4839043215231
20.5362928236242
20.5886813257253
20.6410698278263
20.6934583299274
20.7458468320285
20.7982353341296
20.8506238362307
20.9030123383317
20.9554008404328
21.0077893425339
21.060177844635
21.1125663467361
21.1649548488372
21.2173433509382
21.2697318530393
21.3221203551404
21.3745088572415
21.4268973593426
21.4792858614436
21.5316743635447
21.5840628656458
21.6364513677469
21.688839869848
21.7412283719491
21.7936168740501
21.8460053761512
21.8983938782523
21.9507823803534
22.0031708824545
22.0555593845556
22.1079478866566
22.1603363887577
22.2127248908588
22.2651133929599
22.317501895061
22.369890397162
22.4222788992631
22.4746674013642
22.5270559034653
22.5794444055664
22.6318329076675
22.6842214097685
22.7366099118696
22.7889984139707
22.8413869160718
22.8937754181729
22.9461639202739
22.998552422375
23.0509409244761
23.1033294265772
23.1557179286783
23.2081064307794
23.2604949328804
23.3128834349815
23.3652719370826
23.4176604391837
23.4700489412848
23.5224374433859
23.5748259454869
23.627214447588
23.6796029496891
23.7319914517902
23.7843799538913
23.8367684559923
23.8891569580934
23.9415454601945
23.9939339622956
24.0463224643967
24.0987109664977
24.1510994685988
24.2034879706999
24.255876472801
24.3082649749021
24.3606534770032
24.4130419791042
24.4654304812053
24.5178189833064
24.5702074854075
24.6225959875086
24.6749844896097
24.7273729917107
24.7797614938118
24.8321499959129
24.884538498014
24.9369270001151
24.9893155022161
25.0417040043172
25.0940925064183
25.1464810085194
25.1988695106205
25.2512580127216
25.3036465148226
25.3560350169237
25.4084235190248
25.4608120211259
25.513200523227
25.5655890253281
25.6179775274291
25.6703660295302
25.7227545316313
25.7751430337324
25.8275315358335
25.8799200379345
25.9323085400356
25.9846970421367
26.0370855442378
26.0894740463389
26.14186254844
26.194251050541
26.2466395526421
26.2990280547432
26.3514165568443
26.4038050589454
26.4561935610464
26.5085820631475
26.5609705652486
26.6133590673497
26.6657475694508
26.7181360715519
26.7705245736529
26.822913075754
26.8753015778551
26.9276900799562
26.9800785820573
27.0324670841583
27.0848555862594
27.1372440883605
27.1896325904616
27.2420210925627
27.2944095946638
27.3467980967648
27.3991865988659
27.451575100967
27.5039636030681
27.5563521051692
27.6087406072702
27.6611291093713
27.7135176114724
27.7659061135735
27.8182946156746
27.8706831177757
27.9230716198767
27.9754601219778
28.0278486240789
28.08023712618
28.1326256282811
28.1850141303822
28.2374026324832
28.2897911345843
28.3421796366854
28.3945681387865
28.4469566408876
28.4993451429886
28.5517336450897
28.6041221471908
28.6565106492919
28.708899151393
28.7612876534941
28.8136761555951
28.8660646576962
28.9184531597973
28.9708416618984
29.0232301639995
29.0756186661005
29.1280071682016
29.1803956703027
29.2327841724038
29.2851726745049
29.337561176606
29.389949678707
29.4423381808081
29.4947266829092
29.5471151850103
29.5995036871114
29.6518921892124
29.7042806913135
29.7566691934146
29.8090576955157
29.8614461976168
29.9138346997179
29.9662232018189
30.01861170392
30.0710002060211
30.1233887081222
30.1757772102233
30.2281657123244
30.2805542144254
30.3329427165265
30.3853312186276
30.4377197207287
30.4901082228298
30.5424967249308
30.5948852270319
30.647273729133
30.6996622312341
30.7520507333352
30.8044392354363
30.8568277375373
30.9092162396384
30.9616047417395
31.0139932438406
31.0663817459417
31.1187702480428
31.1711587501438
31.2235472522449
31.275935754346
31.3283242564471
31.3807127585482
31.4331012606492
31.4854897627503
31.5378782648514
31.5902667669525
31.6426552690536
31.6950437711547
31.7474322732557
31.7998207753568
31.8522092774579
31.904597779559
31.9569862816601
32.0093747837611
32.0617632858622
32.1141517879633
32.1665402900644
32.2189287921655
32.2713172942666
32.3237057963676
32.3760942984687
32.4284828005698
32.4808713026709
32.533259804772
32.585648306873
32.6380368089741
32.6904253110752
32.7428138131763
32.7952023152774
32.8475908173785
32.8999793194795
32.9523678215806
33.0047563236817
33.0571448257828
33.1095333278839
33.1619218299849
33.214310332086
33.2666988341871
33.3190873362882
33.3714758383893
33.4238643404904
33.4762528425914
33.5286413446925
33.5810298467936
33.6334183488947
33.6858068509958
33.7381953530968
33.7905838551979
33.842972357299
33.8953608594001
33.9477493615012
34.0001378636023
34.0525263657033
34.1049148678044
34.1573033699055
34.2096918720066
34.2620803741077
34.3144688762088
34.3668573783098
34.4192458804109
34.471634382512
34.5240228846131
34.5764113867142
34.6287998888153
34.6811883909163
34.7335768930174
34.7859653951185
34.8383538972196
34.8907423993207
34.9431309014217
34.9955194035228
35.0479079056239
35.100296407725
35.1526849098261
35.2050734119271
35.2574619140282
35.3098504161293
35.3622389182304
35.4146274203315
35.4670159224326
35.5194044245336
35.5717929266347
35.6241814287358
35.6765699308369
35.728958432938
35.781346935039
35.8337354371401
35.8861239392412
35.9385124413423
35.9909009434434
36.0432894455445
36.0956779476455
36.1480664497466
36.2004549518477
36.2528434539488
36.3052319560499
36.357620458151
36.410008960252
36.4623974623531
36.5147859644542
36.5671744665553
36.6195629686564
36.6719514707574
36.7243399728585
36.7767284749596
36.8291169770607
36.8815054791618
36.9338939812629
36.9862824833639
37.038670985465
37.0910594875661
37.1434479896672
37.1958364917683
37.2482249938693
37.3006134959704
37.3530019980715
37.4053905001726
37.4577790022737
37.5101675043748
37.5625560064758
37.6149445085769
37.667333010678
37.7197215127791
37.7721100148802
37.8244985169813
37.8768870190823
37.9292755211834
37.9816640232845
38.0340525253856
38.0864410274867
38.1388295295877
38.1912180316888
38.2436065337899
38.295995035891
38.3483835379921
38.4007720400932
38.4531605421942
38.5055490442953
38.5579375463964
38.6103260484975
38.6627145505986
38.7151030526996
38.7674915548007
38.8198800569018
38.8722685590029
38.924657061104
38.9770455632051
39.0294340653061
39.0818225674072
39.1342110695083
39.1865995716094
39.2389880737105
39.2913765758115
39.3437650779126
39.3961535800137
39.4485420821148
39.5009305842159
39.553319086317
39.605707588418
39.6580960905191
39.7104845926202
39.7628730947213
39.8152615968224
39.8676500989234
39.9200386010245
39.9724271031256
40.0248156052267
40.0772041073278
40.1295926094289
40.1819811115299
40.234369613631
40.2867581157321
40.3391466178332
40.3915351199343
40.4439236220354
40.4963121241364
40.5487006262375
40.6010891283386
40.6534776304397
40.7058661325408
40.7582546346419
40.8106431367429
40.863031638844
40.9154201409451
40.9678086430462
41.0201971451473
41.0725856472483
41.1249741493494
41.1773626514505
41.2297511535516
41.2821396556527
41.3345281577538
41.3869166598548
41.4393051619559
41.491693664057
41.5440821661581
41.5964706682592
41.6488591703602
41.7012476724613
41.7536361745624
41.8060246766635
41.8584131787646
41.9108016808657
41.9631901829667
42.0155786850678
42.0679671871689
42.12035568927
42.1727441913711
42.2251326934721
42.2775211955732
42.3299096976743
42.3822981997754
42.4346867018765
42.4870752039776
42.5394637060786
42.5918522081797
42.6442407102808
42.6966292123819
42.749017714483
42.801406216584
42.8537947186851
42.9061832207862
42.9585717228873
43.0109602249884
43.0633487270895
43.1157372291905
43.1681257312916
43.2205142333927
43.2729027354938
43.3252912375949
43.3776797396959
43.430068241797
43.4824567438981
43.5348452459992
43.5872337481003
43.6396222502014
43.6920107523024
43.7443992544035
43.7967877565046
43.8491762586057
43.9015647607068
43.9539532628079
44.0063417649089
44.05873026701
44.1111187691111
44.1635072712122
44.2158957733133
44.2682842754143
44.3206727775154
44.3730612796165
44.4254497817176
44.4778382838187
44.5302267859198
44.5826152880208
44.6350037901219
44.687392292223
44.7397807943241
44.7921692964252
44.8445577985262
44.8969463006273
44.9493348027284
45.0017233048295
45.0541118069306
45.1065003090317
45.1588888111327
45.2112773132338
45.2636658153349
45.316054317436
45.3684428195371
45.4208313216381
45.4732198237392
45.5256083258403
45.5779968279414
45.6303853300425
45.6827738321436
45.7351623342446
45.7875508363457
45.8399393384468
45.8923278405479
45.944716342649
45.9971048447501
46.0494933468511
46.1018818489522
46.1542703510533
46.2066588531544
46.2590473552555
46.3114358573565
46.3638243594576
46.4162128615587
46.4686013636598
46.5209898657609
46.573378367862
46.625766869963
46.6781553720641
46.7305438741652
46.7829323762663
46.8353208783674
46.8877093804685
46.9400978825695
46.9924863846706
47.0448748867717
47.0972633888728
47.1496518909739
47.2020403930749
47.254428895176
47.3068173972771
47.3592058993782
47.4115944014793
47.4639829035804
47.5163714056814
47.5687599077825
47.6211484098836
47.6735369119847
47.7259254140858
47.7783139161868
47.8307024182879
47.883090920389
47.9354794224901
47.9878679245912
48.0402564266923
48.0926449287933
48.1450334308944
48.1974219329955
48.2498104350966
48.3021989371977
48.3545874392987
48.4069759413998
48.4593644435009
48.511752945602
48.5641414477031
48.6165299498042
48.6689184519052
48.7213069540063
48.7736954561074
48.8260839582085
48.8784724603096
48.9308609624106
48.9832494645117
49.0356379666128
49.0880264687139
49.140414970815
49.1928034729161
49.2451919750171
49.2975804771182
49.3499689792193
49.4023574813204
49.4547459834215
49.5071344855226
49.5595229876236
49.6119114897247
49.6642999918258
49.7166884939269
49.769076996028
49.821465498129
49.8738540002301
49.9262425023312
49.9786310044323
50.0310195065334
50.0834080086345
50.1357965107355
50.1881850128366
50.2405735149377
50.2929620170388
50.3453505191399
50.397739021241
50.450127523342
50.5025160254431
50.5549045275442
50.6072930296453
50.6596815317464
50.7120700338474
50.7644585359485
50.8168470380496
50.8692355401507
50.9216240422518
50.9740125443529
51.0264010464539
51.078789548555
51.1311780506561
51.1835665527572
51.2359550548583
51.2883435569593
51.3407320590604
51.3931205611615
51.4455090632626
51.4978975653637
51.5502860674648
51.6026745695658
51.6550630716669
51.707451573768
51.7598400758691
51.8122285779702
51.8646170800712
51.9170055821723
51.9693940842734
52.0217825863745
52.0741710884756
52.1265595905767
52.1789480926777
52.2313365947788
52.2837250968799
52.336113598981
52.3885021010821
52.4408906031831
52.4932791052842
52.5456676073853
52.5980561094864
52.6504446115875
52.7028331136886
52.7552216157896
52.8076101178907
52.8599986199918
52.9123871220929
52.964775624194
53.017164126295
53.0695526283961
53.1219411304972
53.1743296325983
53.2267181346994
53.2791066368005
53.3314951389015
53.3838836410026
53.4362721431037
53.4886606452048
53.5410491473059
53.593437649407
53.645826151508
53.6982146536091
53.7506031557102
53.8029916578113
53.8553801599124
53.9077686620134
53.9601571641145
54.0125456662156
54.0649341683167
54.1173226704178
54.1697111725189
54.2220996746199
54.274488176721
54.3268766788221
54.3792651809232
54.4316536830243
54.4840421851253
54.5364306872264
54.5888191893275
54.6412076914286
54.6935961935297
54.7459846956308
54.7983731977318
54.8507616998329
54.903150201934
54.9555387040351
55.0079272061362
55.0603157082372
55.1127042103383
55.1650927124394
55.2174812145405
55.2698697166416
55.3222582187427
55.3746467208437
55.4270352229448
55.4794237250459
55.531812227147
55.5842007292481
55.6365892313492
55.6889777334502
55.7413662355513
55.7937547376524
55.8461432397535
55.8985317418546
55.9509202439557
56.0033087460567
56.0556972481578
56.1080857502589
56.16047425236
56.2128627544611
56.2652512565621
56.3176397586632
56.3700282607643
56.4224167628654
56.4748052649665
56.5271937670676
56.5795822691686
56.6319707712697
56.6843592733708
56.7367477754719
56.789136277573
56.841524779674
56.8939132817751
56.9463017838762
56.9986902859773
57.0510787880784
57.1034672901795
57.1558557922805
57.2082442943816
57.2606327964827
57.3130212985838
57.3654098006849
57.4177983027859
57.470186804887
57.5225753069881
57.5749638090892
57.6273523111903
57.6797408132914
57.7321293153924
57.7845178174935
57.8369063195946
57.8892948216957
57.9416833237968
57.9940718258979
58.0464603279989
58.0988488301
58.1512373322011
58.2036258343022
58.2560143364033
58.3084028385043
58.3607913406054
58.4131798427065
58.4655683448076
58.5179568469087
58.5703453490097
58.6227338511108
58.6751223532119
58.727510855313
58.7798993574141
58.8322878595152
58.8846763616162
58.9370648637173
58.9894533658184
59.0418418679195
59.0942303700206
59.1466188721216
59.1990073742227
59.2513958763238
59.3037843784249
59.356172880526
59.4085613826271
59.4609498847281
59.5133383868292
59.5657268889303
59.6181153910314
59.6705038931325
59.7228923952336
59.7752808973346
59.8276693994357
59.8800579015368
59.9324464036379
59.984834905739
60.03722340784
60.0896119099411
60.1420004120422
60.1943889141433
60.2467774162444
60.2991659183455
60.3515544204465
60.4039429225476
60.4563314246487
60.5087199267498
60.5611084288509
60.6134969309519
60.665885433053
60.7182739351541
60.7706624372552
60.8230509393563
60.8754394414574
60.9278279435584
60.9802164456595
61.0326049477606
61.0849934498617
61.1373819519628
61.1897704540639
61.2421589561649
61.294547458266
61.3469359603671
61.3993244624682
61.4517129645693
61.5041014666703
61.5564899687714
61.6088784708725
61.6612669729736
61.7136554750747
61.7660439771758
61.8184324792768
61.8708209813779
61.923209483479
61.9755979855801
62.0279864876812
62.0803749897822
62.1327634918833
62.1851519939844
62.2375404960855
62.2899289981866
62.3423175002877
62.3947060023887
62.4470945044898
62.4994830065909
62.551871508692
62.6042600107931
62.6566485128942
62.7090370149952
62.7614255170963
62.8138140191974
62.8662025212985
62.9185910233996
62.9709795255006
63.0233680276017
63.0757565297028
63.1281450318039
63.180533533905
63.2329220360061
63.2853105381071
63.3376990402082
63.3900875423093
63.4424760444104
63.4948645465115
63.5472530486126
63.5996415507136
63.6520300528147
63.7044185549158
63.7568070570169
63.809195559118
63.861584061219
63.9139725633201
63.9663610654212
64.0187495675223
64.0711380696234
64.1235265717245
64.1759150738255
64.2283035759266
64.2806920780277
64.3330805801288
64.3854690822299
64.4378575843309
64.490246086432
64.5426345885331
64.5950230906342
64.6474115927353
64.6998000948364
64.7521885969374
64.8045770990385
64.8569656011396
64.9093541032407
64.9617426053418
65.0141311074428
65.0665196095439
65.118908111645
65.1712966137461
65.2236851158472
65.2760736179482
65.3284621200493
65.3808506221504
65.4332391242515
65.4856276263526
65.5380161284537
65.5904046305547
65.6427931326558
65.6951816347569
65.747570136858
65.7999586389591
65.8523471410602
65.9047356431612
65.9571241452623
66.0095126473634
66.0619011494645
66.1142896515656
66.1666781536667
66.2190666557677
66.2714551578688
66.3238436599699
66.376232162071
66.4286206641721
66.4810091662731
66.5333976683742
66.5857861704753
66.6381746725764
66.6905631746775
66.7429516767785
66.7953401788796
66.8477286809807
66.9001171830818
66.9525056851829
67.004894187284
67.057282689385
67.1096711914861
67.1620596935872
67.2144481956883
67.2668366977894
67.3192251998905
67.3716137019915
67.4240022040926
67.4763907061937
67.5287792082948
67.5811677103959
67.6335562124969
67.685944714598
67.7383332166991
67.7907217188002
67.8431102209013
67.8954987230024
67.9478872251034
68.0002757272045
68.0526642293056
68.1050527314067
68.1574412335078
68.2098297356088
68.2622182377099
68.314606739811
68.3669952419121
68.4193837440132
68.4717722461143
68.5241607482154
68.5765492503164
68.6289377524175
68.6813262545186
68.7337147566197
68.7861032587208
68.8384917608218
68.8908802629229
68.943268765024
68.9956572671251
69.0480457692262
69.1004342713272
69.1528227734283
69.2052112755294
69.2575997776305
69.3099882797316
69.3623767818327
69.4147652839337
69.4671537860348
69.5195422881359
69.571930790237
69.6243192923381
69.6767077944392
69.7290962965402
69.7814847986413
69.8338733007424
69.8862618028435
69.9386503049446
69.9910388070456
70.0434273091467
70.0958158112478
70.1482043133489
70.20059281545
70.2529813175511
70.3053698196521
70.3577583217532
70.4101468238543
70.4625353259554
70.5149238280565
70.5673123301575
70.6197008322586
70.6720893343597
70.7244778364608
70.7768663385619
70.829254840663
70.881643342764
70.9340318448651
70.9864203469662
71.0388088490673
71.0911973511684
71.1435858532694
71.1959743553705
71.2483628574716
71.3007513595727
71.3531398616738
71.4055283637749
71.4579168658759
71.510305367977
71.5626938700781
71.6150823721792
71.6674708742803
71.7198593763814
71.7722478784824
71.8246363805835
71.8770248826846
71.9294133847857
71.9818018868868
72.0341903889878
72.0865788910889
72.13896739319
72.1913558952911
72.2437443973922
72.2961328994932
72.3485214015943
72.4009099036954
72.4532984057965
72.5056869078976
72.5580754099987
72.6104639120997
72.6628524142008
72.7152409163019
72.767629418403
72.8200179205041
72.8724064226052
72.9247949247062
72.9771834268073
73.0295719289084
73.0819604310095
73.1343489331106
73.1867374352116
73.2391259373127
73.2915144394138
73.3439029415149
73.396291443616
73.4486799457171
73.5010684478181
73.5534569499192
73.6058454520203
73.6582339541214
73.7106224562225
73.7630109583235
73.8153994604246
73.8677879625257
73.9201764646268
73.9725649667279
74.024953468829
74.07734197093
74.1297304730311
74.1821189751322
74.2345074772333
74.2868959793344
74.3392844814355
74.3916729835365
74.4440614856376
74.4964499877387
74.5488384898398
74.6012269919409
74.6536154940419
74.706003996143
74.7583924982441
74.8107810003452
74.8631695024463
74.9155580045473
74.9679465066484
75.0203350087495
75.0727235108506
75.1251120129517
75.1775005150528
75.2298890171539
75.2822775192549
75.334666021356
75.3870545234571
75.4394430255582
75.4918315276593
75.5442200297603
75.5966085318614
75.6489970339625
75.7013855360636
75.7537740381647
75.8061625402658
75.8585510423668
75.9109395444679
75.963328046569
76.0157165486701
76.0681050507712
76.1204935528722
76.1728820549733
76.2252705570744
76.2776590591755
76.3300475612766
76.3824360633777
76.4348245654787
76.4872130675798
76.5396015696809
76.591990071782
76.6443785738831
76.6967670759841
76.7491555780852
76.8015440801863
76.8539325822874
76.9063210843885
76.9587095864896
77.0110980885906
77.0634865906917
77.1158750927928
77.1682635948939
77.220652096995
77.273040599096
77.3254291011971
77.3778176032982
77.4302061053993
77.4825946075004
77.5349831096015
77.5873716117025
77.6397601138036
77.6921486159047
77.7445371180058
77.7969256201069
77.8493141222079
77.901702624309
77.9540911264101
78.0064796285112
78.0588681306123
78.1112566327134
78.1636451348144
78.2160336369155
78.2684221390166
78.3208106411177
78.3731991432188
78.4255876453199
78.4779761474209
78.530364649522
78.5827531516231
78.6351416537242
78.6875301558253
78.7399186579263
78.7923071600274
78.8446956621285
78.8970841642296
78.9494726663307
79.0018611684318
79.0542496705328
79.1066381726339
79.159026674735
79.2114151768361
79.2638036789372
79.3161921810382
79.3685806831393
79.4209691852404
79.4733576873415
79.5257461894426
79.5781346915437
79.6305231936447
79.6829116957458
79.7353001978469
79.787688699948
79.8400772020491
79.8924657041502
79.9448542062512
79.9972427083523
80.0496312104534
80.1020197125545
80.1544082146556
80.2067967167566
80.2591852188577
80.3115737209588
80.3639622230599
80.416350725161
80.468739227262
80.5211277293631
80.5735162314642
80.6259047335653
80.6782932356664
80.7306817377675
80.7830702398686
80.8354587419696
80.8878472440707
80.9402357461718
80.9926242482729
81.045012750374
81.097401252475
81.1497897545761
81.2021782566772
81.2545667587783
81.3069552608794
81.3593437629805
81.4117322650815
81.4641207671826
81.5165092692837
81.5688977713848
81.6212862734859
81.6736747755869
81.726063277688
81.7784517797891
81.8308402818902
81.8832287839913
81.9356172860924
81.9880057881934
82.0403942902945
82.0927827923956
82.1451712944967
82.1975597965978
82.2499482986989
82.3023368007999
82.354725302901
82.4071138050021
82.4595023071032
82.5118908092043
82.5642793113053
82.6166678134064
82.6690563155075
82.7214448176086
82.7738333197097
82.8262218218107
82.8786103239118
82.9309988260129
82.983387328114
83.0357758302151
83.0881643323162
83.1405528344172
83.1929413365183
83.2453298386194
83.2977183407205
83.3501068428216
83.4024953449226
83.4548838470237
83.5072723491248
83.5596608512259
83.612049353327
83.6644378554281
83.7168263575291
83.7692148596302
83.8216033617313
83.8739918638324
83.9263803659335
83.9787688680345
84.0311573701356
84.0835458722367
84.1359343743378
84.1883228764389
84.24071137854
84.293099880641
84.3454883827421
84.3978768848432
84.4502653869443
84.5026538890454
84.5550423911465
84.6074308932475
84.6598193953486
84.7122078974497
84.7645963995508
84.8169849016519
84.8693734037529
84.921761905854
84.9741504079551
85.0265389100562
85.0789274121573
85.1313159142584
85.1837044163594
85.2360929184605
85.2884814205616
85.3408699226627
85.3932584247638
85.4456469268649
85.4980354289659
85.550423931067
85.6028124331681
85.6552009352692
85.7075894373703
85.7599779394713
85.8123664415724
85.8647549436735
85.9171434457746
85.9695319478757
86.0219204499767
86.0743089520778
86.1266974541789
86.17908595628
86.2314744583811
86.2838629604822
86.3362514625832
86.3886399646843
86.4410284667854
86.4934169688865
86.5458054709876
86.5981939730887
86.6505824751897
86.7029709772908
86.7553594793919
86.807747981493
86.8601364835941
86.9125249856951
86.9649134877962
87.0173019898973
87.0696904919984
87.1220789940995
87.1744674962006
87.2268559983016
87.2792445004027
87.3316330025038
87.3840215046049
87.436410006706
87.4887985088071
87.5411870109081
87.5935755130092
87.6459640151103
87.6983525172114
87.7507410193125
87.8031295214136
87.8555180235146
87.9079065256157
87.9602950277168
88.0126835298179
88.065072031919
88.11746053402
88.1698490361211
88.2222375382222
88.2746260403233
88.3270145424244
88.3794030445254
88.4317915466265
88.4841800487276
88.5365685508287
88.5889570529298
88.6413455550309
88.6937340571319
88.746122559233
88.7985110613341
88.8508995634352
88.9032880655363
88.9556765676374
89.0080650697384
89.0604535718395
89.1128420739406
89.1652305760417
89.2176190781428
89.2700075802438
89.3223960823449
89.374784584446
89.4271730865471
89.4795615886482
89.5319500907492
89.5843385928503
89.6367270949514
89.6891155970525
89.7415040991536
89.7938926012547
89.8462811033557
89.8986696054568
89.9510581075579
90.003446609659
90.0558351117601
90.1082236138612
90.1606121159622
90.2130006180633
90.2653891201644
90.3177776222655
90.3701661243666
90.4225546264676
90.4749431285687
90.5273316306698
90.5797201327709
90.632108634872
90.6844971369731
90.7368856390741
90.7892741411752
90.8416626432763
90.8940511453774
90.9464396474785
90.9988281495796
91.0512166516806
91.1036051537817
91.1559936558828
91.2083821579839
91.260770660085
91.313159162186
91.3655476642871
91.4179361663882
91.4703246684893
91.5227131705904
91.5751016726914
91.6274901747925
91.6798786768936
91.7322671789947
91.7846556810958
91.8370441831969
91.8894326852979
91.941821187399
91.9942096895001
92.0465981916012
92.0989866937023
92.1513751958034
92.2037636979044
92.2561522000055
92.3085407021066
92.3609292042077
92.4133177063088
92.4657062084098
92.5180947105109
92.570483212612
92.6228717147131
92.6752602168142
92.7276487189153
92.7800372210163
92.8324257231174
92.8848142252185
92.9372027273196
92.9895912294207
93.0419797315217
93.0943682336228
93.1467567357239
93.199145237825
93.2515337399261
93.3039222420272
93.3563107441283
93.4086992462293
93.4610877483304
93.5134762504315
93.5658647525326
93.6182532546337
93.6706417567347
93.7230302588358
93.7754187609369
93.827807263038
93.8801957651391
93.9325842672401
93.9849727693412
94.0373612714423
94.0897497735434
94.1421382756445
94.1945267777456
94.2469152798466
94.2993037819477
94.3516922840488
94.4040807861499
94.456469288251
94.5088577903521
94.5612462924531
94.6136347945542
94.6660232966553
94.7184117987564
94.7708003008575
94.8231888029585
94.8755773050596
94.9279658071607
94.9803543092618
95.0327428113629
95.085131313464
95.137519815565
95.1899083176661
95.2422968197672
95.2946853218683
95.3470738239694
95.3994623260704
95.4518508281715
95.5042393302726
95.5566278323737
95.6090163344748
95.6614048365759
95.7137933386769
95.766181840778
95.8185703428791
95.8709588449802
95.9233473470813
95.9757358491823
96.0281243512834
96.0805128533845
96.1329013554856
96.1852898575867
96.2376783596877
96.2900668617888
96.3424553638899
96.394843865991
96.4472323680921
96.4996208701932
96.5520093722943
96.6043978743953
96.6567863764964
96.7091748785975
96.7615633806986
96.8139518827997
96.8663403849007
96.9187288870018
96.9711173891029
97.023505891204
97.0758943933051
97.1282828954061
97.1806713975072
97.2330598996083
97.2854484017094
97.3378369038105
97.3902254059116
97.4426139080126
97.4950024101137
97.5473909122148
97.5997794143159
97.652167916417
97.7045564185181
97.7569449206191
97.8093334227202
97.8617219248213
97.9141104269224
97.9664989290235
98.0188874311245
98.0712759332256
98.1236644353267
98.1760529374278
98.2284414395289
98.28082994163
98.333218443731
98.3856069458321
98.4379954479332
98.4903839500343
98.5427724521354
98.5951609542364
98.6475494563375
98.6999379584386
98.7523264605397
98.8047149626408
98.8571034647419

Radius_High_Absorbent
100	100	100	100	100	100	100	100	100	100
99.9998990669354	99.9998980474085	99.9998948613867	99.9998890845334	99.9998798415667	99.9998654225353	99.999842291997	99.9998020918382	99.9997196298729	99.9994687710581
99.9996968370574	99.9996937757589	99.9996842093242	99.9996668640659	99.9996391129261	99.9995958242779	99.9995263900388	99.9994057389137	99.9991583422152	99.9984065024762
99.9993929449344	99.9993868169235	99.9993676672937	99.9993329473432	99.9992774005614	99.9991907602564	99.9990518072662	99.9988104086298	99.9983156574522	99.996813220657
99.9989870234454	99.9989768011047	99.9989448570846	99.9988869413834	99.9987942892087	99.9986497838709	99.9984180560718	99.998015575259	99.9971911394277	99.9946888241631
99.9984787037738	99.9984633568275	99.9984153987881	99.9983284514706	99.9981893618552	99.9979724469126	99.9976246483606	99.9970207212642	99.9957843785472	99.992033108917
99.9978676154006	99.9978461109316	99.9977789107892	99.9976570811485	99.9974621997366	99.9971582995913	99.9966710958423	99.9958253376376	99.9940949801479	99.9888457864697
99.9971533860973	99.9971246885633	99.9970350097588	99.9968724322137	99.9966123823357	99.9962068905707	99.9955569103134	99.9944289236363	99.9921225564868	99.9851264973757
99.9963356419198	99.9962987131676	99.9961833106472	99.9959741047093	99.9956394873824	99.9951177670109	99.9942816039043	99.9928309861627	99.9898667212318	99.9808748210992
99.995414007201	99.9953678064804	99.9952234266752	99.9949616969189	99.9945430908538	99.9938904746161	99.9928446892834	99.991031038956	99.9873270856865	99.9760902834448
99.9943881045439	99.9943315885204	99.9941549693275	99.9938348053599	99.9933227669764	99.9925245576866	99.991245679812	99.9890286016996	99.9845032562131	99.9707723622121
99.9932575548143	99.9931896775812	99.992977548345	99.9925930247777	99.9919780882294	99.9910195591719	99.9894840896524	99.9868231991124	99.981394832485	99.9649204915646
99.9920219771341	99.9919416902232	99.9916907717164	99.9912359481402	99.9905086253492	99.9893750207238	99.9875594338314	99.9844143600642	99.9780014063119	99.9585340654581
99.9906809888733	99.9905872412658	99.9902942456716	99.9897631666315	99.9889139473344	99.9875904827489	99.9854712282664	99.981801616739	99.9743225608615	99.9516124403769
99.9892342056434	99.989125943779	99.9887875746735	99.9881742696473	99.9871936214535	99.9856654844571	99.9832189897559	99.9789845038569	99.9703578701535	99.94415493755
99.9876812412892	99.9875574090758	99.9871703614107	99.9864688447891	99.9853472132517	99.9835995639074	99.9808022359424	99.9759625579625	99.9661068987413	99.9361608447757
99.986021707882	99.9858812467038	99.9854422067896	99.9846464778597	99.9833742865596	99.981392258049	99.9782204852519	99.972735316776	99.9615692015229	99.9276294179442
99.984330463886	99.9841730727931	99.9836810938616	99.9827894442094	99.98136398685	99.9791434379407	99.9755908405425	99.969449882112	99.9569533934084	99.9189561383457
99.9825321679853	99.9823567856571	99.9818085438435	99.9808149551368	99.9792266309342	99.9767526707451	99.972795644085	99.9659586854004	99.9520504319408	99.9097439857257
99.9806264283873	99.9804319909893	99.9798241537652	99.9787225925785	99.9769617791503	99.9742194918365	99.9698344171801	99.9622612621047	99.9468597928012	99.8999922499298
99.9786128515011	99.9783982926931	99.9777275188523	99.9765119366626	99.9745689901636	99.9715434355837	99.9667066813973	99.9583571447239	99.9413809600799	99.8897001669718
99.9764910419297	99.9762552928737	99.9755182325181	99.9741825657051	99.9720478209757	99.9687240353624	99.9634119583765	99.954245863562	99.9356134206928	99.8788669271018
99.9742606024624	99.9740025918296	99.9731958863569	99.9717340562068	99.9693978269334	99.9657608235599	99.9599497696777	99.9499269471193	99.9295566605383	99.8674916806103
99.9719211340667	99.9716397880449	99.9707600701363	99.9691659828499	99.9666185617371	99.9626533315742	99.9563196366609	99.945399922237	99.9232101618594	99.8555735420416
99.9694722358805	99.9691664781809	99.9682103717903	99.9664779184953	99.9637095774483	99.9594010898093	99.9525210803805	99.9406643140868	99.9165734014384	99.8431115932841
99.9669135052037	99.9665822570678	99.9655463774121	99.96366943418	99.9606704244964	99.9560036276677	99.948553621489	99.9357196460658	99.9096458493661	99.8301048858665
99.9642445374907	99.9638867176966	99.9627676712468	99.9607400991144	99.9575006516846	99.9524604735394	99.9444167801445	99.9305654396368	99.9024269682073	99.8165524426864
99.9614649263416	99.9610794512109	99.9598738356849	99.9576894806794	99.9541998061951	99.9487711547893	99.9401100759184	99.9252012141399	99.8949162124408	99.8024532593316
99.9585742634945	99.9581600468985	99.9568644512546	99.9545171444246	99.9507674335935	99.9449351977423	99.9356330277038	99.9196264865938	99.8871130280873	99.7878063051071
99.9555721388168	99.9551280921835	99.9537390966156	99.9512226540653	99.9472030778321	99.9409521276657	99.9309851536226	99.9138407714952	99.8790168524663	99.7726105238447
99.9524581402975	99.9519831726177	99.9504973485519	99.9478055714803	99.9435062812524	99.9368214687508	99.9261659709318	99.9078435806259	99.8706271140418	99.7568648345535
99.949231854038	99.9487248718724	99.9471387819651	99.9442654567094	99.9396765845867	99.9325427440911	99.9211749959298	99.9016344228676	99.8619432323285	99.7405681319489
99.9458928642446	99.9453527717305	99.9436629698674	99.940601867951	99.9357135269586	99.9281154756601	99.9160117438613	99.8952128040299	99.852964617838	99.7237192868906
99.9424407532192	99.9418664520777	99.9400694833753	99.9368143615593	99.9316166458833	99.9235391842862	99.9106757288236	99.8885782266894	99.843690672053	99.7063171467479
99.9389562907793	99.9383475007935	99.9364424656241	99.9329917152004	99.9274821396971	99.9189216585265	99.9052933542997	99.8818894533692	99.8343464911866	99.6887886541959
99.9353581871984	99.9347138077947	99.9326972415128	99.92904460361	99.9232132464758	99.9141545444802	99.8997376802602	99.8749872114934	99.8247062937194	99.6707045779673
99.9316460206428	99.9309649488398	99.9288333780708	99.9249725792814	99.918809500632	99.9092373610768	99.8940082179804	99.8678709904589	99.8147694005841	99.652063829325
99.9278193673476	99.9271004977658	99.9248504404129	99.92077519286	99.9142704349642	99.9041696259778	99.8881044770966	99.8605402736148	99.8045351432774	99.6328652689494
99.923877801608	99.9231200264798	99.9207479917332	99.9164519931398	99.9095955806525	99.8989508555418	99.8820259654358	99.8529945393931	99.7940028578242	99.6131077150103
99.9198208957712	99.9190231049507	99.9165255932982	99.91200252706	99.9047844672518	99.8935805647857	99.8757721889057	99.8452332619966	99.7831718806053	99.5927899488696
99.9156482202271	99.9148093012009	99.9121828044403	99.9074263397017	99.8998366226851	99.8880582673446	99.8693426514181	99.8372559117925	99.7720415454747	99.5719107191294
99.9113593434002	99.9104781812979	99.9077191825517	99.9027229742835	99.8947515732354	99.8823834754322	99.8627368548352	99.8290619555121	99.7606111817684	99.5504687445219
99.9069538317407	99.9060293093463	99.903134283077	99.8978919721575	99.8895288435367	99.8765556998006	99.855954298925	99.8206508563244	99.7488801129303	99.5284627159848
99.9024312497153	99.9014622474794	99.8984276595075	99.8929328728049	99.8841679565639	99.8705744497016	99.8489944813227	99.8120220738309	99.7368476555636	99.505891298163
99.8977911597992	99.8967765558507	99.8935988633737	99.8878452138311	99.8786684336222	99.8644392328496	99.8418568974937	99.8031750640105	99.7245131187768	99.4827531305038
99.8930331224667	99.891971792626	99.8886474442395	99.882628530961	99.8730297943357	99.8581495553844	99.8345410406955	99.7941092791364	99.7118758037337	99.4590468280616
99.8881566961823	99.8870475139744	99.8835729496948	99.8772823580333	99.8672515566351	99.8517049218351	99.8270464019379	99.7848241676788	99.6989350033427	99.4347709820954
99.8831614373923	99.8820032740607	99.878374925349	99.8718062269951	99.861333236745	99.8451048350855	99.8193724699419	99.7753191741996	99.685690002043	99.4099241605141
99.8780469005152	99.8768386250366	99.8730529148245	99.8661996678959	99.8552743491703	99.8383487963384	99.8115187310952	99.7655937392481	99.672140075657	99.3845049082127
99.8728126379334	99.8715531170325	99.867606459749	99.8604622088814	99.849074406683	99.8314363050824	99.8034846694074	99.7556472992578	99.6582844912886	99.3585117473253
99.8674581999836	99.866146298149	99.8620350997495	99.8545933761869	99.8427329203069	99.824366859057	99.7952697664615	99.7454792864479	99.6441225072511	99.3319431774172
99.8620707068806	99.8607061718259	99.8564295969598	99.848688936414	99.8363536711552	99.8172567549496	99.7870104073925	99.7352609971705	99.6298970404882	99.3052604581841
99.8565624788624	99.8551441733861	99.8506986195961	99.842652541731	99.8298322897853	99.8099891142528	99.7785696376199	99.7248205238975	99.6153642555538	99.2779994081484
99.8509330618384	99.8494598465389	99.8448417030182	99.8364837144319	99.8231682837744	99.8025634311129	99.7699469324627	99.7141572829141	99.6005233270587	99.2501586031772
99.8451819996439	99.8436527329388	99.8388583805649	99.8301819748796	99.816361158896	99.7949791977829	99.7611417644814	99.7032706835053	99.5853734416828	99.2217365668076
99.8393088340314	99.8377223721778	99.8327481835466	99.8237468414974	99.8094104191031	99.7872359045848	99.7521536033396	99.6921601292102	99.5699137916652	99.1927317787674
99.8333131046613	99.8316683017761	99.826510641238	99.8171778307609	99.8023155665108	99.7793330398701	99.7429819157269	99.6808250185975	99.5541435702952	99.163142680961
99.8271943490929	99.8254900571742	99.8201452808702	99.810474457189	99.7950761013784	99.7712700899782	99.7336261653173	99.6692647457211	99.5380619687875	99.1329676816872
99.8209521027751	99.8191871717237	99.8136516276233	99.8036362333353	99.7876915220915	99.7630465391979	99.7240858127478	99.657478700365	99.5216681741139	99.1022051586194
99.8145858990372	99.812759176679	99.8070292046182	99.796662669778	99.7801613251433	99.754661869728	99.7143603156076	99.6454662681496	99.504961367499	99.0708534609193
99.8080952690798	99.8062056011882	99.800277532909	99.7895532751111	99.7724850051149	99.7461155616408	99.7044491284299	99.6332268305507	99.4879407233724	99.0389109107395
99.8014797419654	99.7995259722849	99.7933961314745	99.7823075559336	99.7646620546564	99.7374070928469	99.6943517026842	99.6207597648627	99.4706054086391	99.0063758042946
99.7947388446089	99.7927198148788	99.7863845172103	99.7749250168401	99.7566919644667	99.7285359390616	99.6840674867664	99.6080644441298	99.4529545821682	98.9732464126262
99.7878721017687	99.7857866517472	99.7792422049202	99.7674051604095	99.7485742232739	99.7195015737724	99.6735959259848	99.5951402370591	99.4349873944332	98.9395209821488
99.7808790360367	99.778726003526	99.7719687073077	99.7597474871943	99.7403083178147	99.7103034682074	99.6629364625428	99.5819865079245	99.4167029872566	98.9051977350369
99.7737591678291	99.7715373887004	99.7645635349676	99.7519514957097	99.7318937328146	99.700941091305	99.6520885355181	99.5686026164688	99.3981004936264	98.870274869498
99.766512015377	99.7642203235965	99.7570261963765	99.744016682422	99.7233299509669	99.6914139096843	99.6410515808382	99.5549879178064	99.3791790375624	98.8347505599604
99.7592310690007	99.7568692475002	99.7494540946373	99.7360458273766	99.7147283628174	99.6818467562985	99.6299720023946	99.5413263141518	99.3601995231935	98.7991209905479
99.7518222391564	99.7493891211273	99.7417492202178	99.7279355364522	99.7059769610375	99.6721141844652	99.6187027699274	99.5274331801458	99.3408999138404	98.7628864743173
99.7442850393645	99.7417794561573	99.7339110771088	99.7196853018786	99.6970752241461	99.6622156556897	99.6072433111898	99.5133078536272	99.3212792456497	98.7260452686586
99.7366189809302	99.7340397620834	99.7259391671566	99.7112946137977	99.6880226285541	99.6521506290318	99.5955930505189	99.4989496648646	99.301336567859	98.6885955753106
99.7288235729341	99.7261695462033	99.7178329900528	99.7027629602505	99.6788186485431	99.641918561073	99.5837514087076	99.4843579378905	99.2810709358439	98.6505355493921
99.7208983222221	99.7181683136093	99.7095920433251	99.6940898271642	99.669462756244	99.6315189058815	99.5717178029391	99.4695319913268	99.2604814062966	98.6118633057308
99.7128427333962	99.710035567179	99.7012158223274	99.6852746983391	99.6599544216155	99.6209511149758	99.5594916467597	99.4544711388703	99.2395670338787	98.572576923307
99.704656308804	99.7017708075658	99.6927038202294	99.6763170554348	99.650293112422	99.6102146372897	99.5470723500702	99.4391746895524	99.2183268688938	98.53267444838
99.6963385485292	99.6933735331885	99.6840555280069	99.6672163779569	99.6404782942114	99.5993089191385	99.5344593191287	99.4236419478525	99.196759955667	98.4921538966887
99.6878889503816	99.6848432402225	99.6752704344311	99.657972143243	99.6305094302935	99.5882334041865	99.5216519565554	99.4078722137181	99.1748653314126	98.4510132550027
99.6793070098871	99.676179422589	99.6663480260579	99.648583826448	99.6203859817164	99.5769875334166	99.5086496613359	99.3918647825248	99.1526420254395	98.4092504822136
99.6705922202772	99.6673815719455	99.6572877872177	99.6390509005306	99.610107407245	99.5655707451012	99.4954518288221	99.3756189450033	99.1300890585907	98.3668635101001
99.6617440724796	99.6584491776754	99.6480892000041	99.6293728362377	99.5996731633378	99.5539824747744	99.4820578507286	99.3591339871455	99.1072054428439	98.3238502438596
99.652762055107	99.6493817268781	99.638751744263	99.6195491020905	99.5890827041249	99.5422221552046	99.4684671151239	99.3424091901023	99.0839901810242	98.2802085624721
99.6436456544476	99.6401787043583	99.6292748975815	99.6095791643685	99.5783354813846	99.5302892163687	99.4546790064176	99.3254438300783	99.0604422665932	98.2359363189417
99.6343943544541	99.630839592616	99.619658135276	99.5994624870951	99.5674309445221	99.5181830854266	99.4406929053427	99.3082371782271	99.0365606834916	98.1910313404488
99.6250076367336	99.6213638718358	99.6099009303815	99.5891985320217	99.5563685405458	99.5059031866955	99.426508188935	99.2907885005508	99.0123444060176	98.1454914284349
99.6155862856617	99.6118533510022	99.6001082914322	99.5788981119876	99.5452683757341	99.4935841324113	99.4122827488809	99.2732961798025	98.988075062865	98.0998533531823
99.6060288727208	99.6022055774547	99.590174561978	99.5684497613394	99.534009688247	99.4810906476446	99.3978579902526	99.2555609814296	98.9634696578551	98.0535761890655
99.5963348744835	99.592420026418	99.5800992102266	99.5578529370759	99.5225919200021	99.4684221502517	99.3832332804659	99.2375821525092	98.9385270718572	98.0066578258512
99.5865037651434	99.5824961707694	99.5698817020669	99.5471070938708	99.5110145104391	99.4555780551357	99.3684079829759	99.2193589318603	98.9132461996027	97.9590960932249
99.5765350165045	99.5724334810281	99.5595215010566	99.5362116840565	99.4992768964966	99.4425577742174	99.353381457146	99.2008905514676	98.8876259422709	97.9108887703609
99.5664280979701	99.5622314253433	99.5490180684095	99.5251661576072	99.4873785125897	99.4293607164025	99.3381530581836	99.1821762373606	98.8616652023426	97.862033592615
99.5561824765322	99.5518894694835	99.5383708629832	99.5139699621227	99.4753187905869	99.415986287548	99.3227221371148	99.1632152101322	98.8353628800227	97.8125282562078
99.5457976167599	99.541407076825	99.5275793412658	99.5026225428113	99.4630971597872	99.402433890429	99.3070880407813	99.1440066852159	98.808717870749	97.7623704215034
99.5352729807888	99.5307837083402	99.5166429573633	99.4911233424729	99.4507130468961	99.3887029247078	99.2912501118467	99.1245498730075	98.7817290634526	97.7115577153037
99.5246080283094	99.520018822586	99.5055611629861	99.4794718014818	99.438165876003	99.3747927869032	99.2752076888062	99.1048439788854	98.7543953393383	97.6600877324493
99.5138022165556	99.5091118756922	99.494333407436	99.4676673577693	99.4254550685568	99.3607028703622	99.2589601059944	99.0848882031689	98.7267155710251	97.607958036931
99.5028550002937	99.4980623213494	99.4829591375921	99.4557094468066	99.4125800433428	99.3464325652331	99.2425066935899	99.0646817410389	98.6986886219348	97.5551661626543
99.4917658318102	99.4868696107971	99.4714377978977	99.4435975015865	99.3995402164586	99.3319812584394	99.2258467776148	99.044223782437	98.6703133458537	97.5017096139544
99.4805341609007	99.4755331928115	99.4597688303464	99.4313309526061	99.3863350012912	99.3173483336549	99.2089796799292	99.0235135119557	98.6415885866123	97.4475858659337
99.4691594348576	99.4640525136931	99.4479516744676	99.4189092278484	99.3729638084926	99.3025331712794	99.1919047182204	99.0025501087241	98.6125131778478	97.3927923646682
99.4576410984584	99.4524270172547	99.4359857673129	99.4063317527648	99.3594260459568	99.2875351484146	99.1746212059876	98.9813327462947	98.5830859428222	97.3373265273185
99.4459785939537	99.4406561448082	99.4238705434413	99.3935979502561	99.3457211187965	99.2723536388407	99.1571284525222	98.9598605925344	98.5533056942802	97.2811857421698
99.4342805408171	99.4288496219771	99.4117191819796	99.380827263801	99.3319784993445	99.257133768599	99.1395967124382	98.9383476407334	98.5234764772802	97.2249511200422
99.42243762742	99.4168970326943	99.3994178107439	99.3678995526508	99.3180680114234	99.2417296870389	99.1218549375146	98.9165789045345	98.4932926290251	97.168036686832
99.4104492906063	99.4047978129251	99.3869658590041	99.3548142342981	99.3039890541021	99.2261407602723	99.1039024261051	98.8945535311999	98.4627528627083	97.1104399218146
99.3983149646546	99.3925513960951	99.3743627534909	99.3415707236225	99.2897410235832	99.2103663509845	99.0857384720865	98.8722706590151	98.4318559058943	97.0521582386698
99.3860340812654	99.3801572130769	99.3616079183807	99.3281684328713	99.2753233131798	99.1944058184058	99.0673623647214	98.8497294187922	98.4006004926396	96.9931889956086
99.3736060695486	99.3676146921772	99.3487007752802	99.3146067716412	99.2607353132914	99.1782585182788	99.0487733885921	98.8269289347982	98.3689853580197	96.9335295024404
99.3610303560107	99.3549232591229	99.3356407432112	99.3008851468585	99.2459764113804	99.1619238028255	99.0299708235758	98.8038683252994	98.3370092343198	96.8731770255041
99.3483063645419	99.3420823370474	99.3224272385951	99.28700296276	99.2310459919477	99.1454010207142	99.0109539448423	98.780546702851	98.3046708483783	96.812128791105
99.3354335164032	99.3290913464774	99.3090596752368	99.2729596208735	99.2159434365085	99.1286895170288	98.9917220228621	98.7569631744209	98.2719689197278	96.7503819879036
99.3224112302132	99.3159497053185	99.2955374643092	99.2587545199983	99.2006681235675	99.1117886332382	98.9722743234175	98.7331168414074	98.2389021592871	96.6879337685679
99.3092389219349	99.3026568288414	99.2818600143371	99.2443870561855	99.1852194285948	99.0946977071686	98.9526101076118	98.7090067995895	98.2054692684363	96.6247812509038
99.2959160048622	99.2892121296674	99.2680267311805	99.2298566227178	99.1695967240007	99.0774160729763	98.9327286318745	98.6846321390383	98.1716689383541	96.5609215186159
99.2824418896063	99.2756150177548	99.254037018019	99.2151626100898	99.1537993791114	99.0599430611223	98.9126291479615	98.6599919440059	98.1374998495399	96.4963516218033
99.2688159840824	99.2618649003835	99.2398902753349	99.2003044059878	99.137826760144	99.0422779983465	98.8923109029492	98.6350852928031	98.1029606714602	96.4310685772646
99.2550376934954	99.2479611821411	99.2255859008965	99.1852813952692	99.1216782301822	99.0244202076447	98.8717731392234	98.6099112576741	98.0680500622828	96.3650693686639
99.2411064203261	99.2339032649076	99.2111232897411	99.1700929599426	99.1053531491515	99.0063690082433	98.8510150944631	98.5844689046717	98.0327666686712	96.2983509465947
99.2271386434662	99.2198088157196	99.1966238178563	99.1548672031577	99.0889903896338	98.9882800844168	98.8302194510453	98.5589879467872	97.9974371894633	96.2315397294584
99.213017143403	99.2055594295771	99.1819653693473	99.1394752764238	99.0724503209987	98.9699969582464	98.809202636115	98.5332375314421	97.961733053139	96.1640036998831
99.1987413167954	99.1911545025667	99.167147333425	99.1239165556348	99.0557322962086	98.9515189401819	98.7879638751567	98.5072167024961	97.9256528006605	96.0957398989714
99.1843105575328	99.176593428021	99.1521690965141	99.1081904137653	99.0388356649798	98.9328453367992	98.7665023886761	98.4809244941285	97.8891949875663	96.0267452959387
99.1697242567207	99.1618755965027	99.1370300422356	99.09229622085	99.0217597737576	98.913975450771	98.7448173920577	98.4543599324067	97.8523581756586	95.9570167987689
99.1549818026659	99.1470003957895	99.121729551389	99.076233343962	99.0045039656912	98.8949085808337	98.7229080954962	98.4275220362506	97.8151409272242	95.8865512616354
99.1400825808622	99.1319672108578	99.1062670019342	99.0600011471924	98.9870675806085	98.8756440217536	98.7007737039714	98.4004098179932	97.7775418010084	95.8153454900644
99.1250259739745	99.1167754238671	99.0906417689742	99.0435989916276	98.969449954991	98.8561810642933	98.6784134172453	98.3730222836757	97.7395593494028	95.7433962445182
99.1098113618246	99.1014244141439	99.0748532247359	99.0270262353291	98.9516504219479	98.8365189951797	98.6558264298708	98.3453584331662	97.7011921164735	95.6707002428696
99.0944381213752	99.0859135581653	99.0589007385528	99.0102822333108	98.9336683111901	98.8166570970731	98.633011931202	98.3174172601694	97.6624386365697	95.5972541620963
99.078905626715	99.0702422295427	99.0427836768455	98.9933663375179	98.9155029490046	98.7965946485381	98.6099691054034	98.2891977521651	97.6232974333352	95.523054639423
99.0632132490427	99.0544097990052	99.0265014031041	98.9762778968041	98.897153658228	98.7763309240161	98.5866971314542	98.2606988903057	97.5837670189979	95.4480982730704
99.0473603566516	99.0384156343829	99.0100532778685	98.9590162569103	98.8786197582209	98.7558651937985	98.5631951831463	98.2319196492911	97.5438458938516	95.3723816227238
99.0313463149133	99.0222591005902	98.9934386587098	98.9415807604421	98.8599005648415	98.7351967240007	98.5394624290771	98.202858997232	97.5035325458706	95.295901209798
99.0151704862619	99.0059395596085	98.9766569002114	98.923970746847	98.8409953904196	98.7143247765369	98.5154980326358	98.1735158955097	97.4628254504156	95.2186535175547
98.9988322301776	98.9894563704693	98.9597073539491	98.9061855523923	98.8219035437304	98.6932486090949	98.4913011519834	98.1438892986371	97.4217230700034	95.1406349911098
98.9823309031704	98.9728088892365	98.9425893684724	98.8882245101423	98.8026243299688	98.6719674751114	98.4668709400293	98.1139781541239	97.3802238541194	95.0618420373589
98.9657919843317	98.956123877222	98.9254337074219	98.8702256427662	98.7833073933175	98.6506491649757	98.4424043441227	98.0840302515336	97.3386806463971	94.9829539862951
98.9490891979751	98.9392737797987	98.9081088115658	98.8520501235057	98.7638022642228	98.6291250099628	98.4177034113789	98.0537964917778	97.2967384294893	94.9032850111811
98.932221894257	98.9222579466634	98.8906140229524	98.8336972784772	98.7441082399014	98.6073942535595	98.3927672811197	98.023275797781	97.2543955398166	94.8228316069109
98.9151894203101	98.9050757244896	98.8729486805392	98.8151664305167	98.724224613897	98.5854561348901	98.3675950871065	97.9924670818153	97.2116503282173	94.7415901887747
98.8979911202257	98.8877264569098	98.8551121201723	98.7964568991569	98.7041506760542	98.563309888685	98.3421859573863	97.9613692471427	97.168501151198	94.6595571036133
98.8806263350367	98.8702094844969	98.8371036745665	98.7775680006036	98.6838857124911	98.5409547452452	98.3165390142161	97.929981189024	97.1249463648453	94.576728637562
98.8630944027003	98.8525241447462	98.8189226732847	98.7584990477119	98.6634290055729	98.5183899304048	98.2906533740319	97.8983017953037	97.0809843205791	94.4931010214138
98.8453946580804	98.8346697720564	98.8005684427172	98.7392493499632	98.6427798338846	98.4956146654956	98.2645281474425	97.866329946714	97.0366133621814	94.4086704343174
98.8275264329299	98.8166456977109	98.7820403060609	98.7198182134406	98.6219374722034	98.4726281673109	98.2381624392345	97.8340645169962	96.9918318237064	94.3234330063041
98.8094890558727	98.7984512498591	98.7633375832985	98.7002049408054	98.6009011914705	98.449429648073	98.2115553483798	97.801504372904	96.9466380280018	94.237384819992
98.7912818523856	98.7800857534971	98.7444595911769	98.6804088312731	98.5796702587638	98.4260183154001	98.1847059680414	97.7686483741342	96.9010302856523	94.1505219117061
98.7729041447801	98.7615485304486	98.7254056431867	98.6604291805884	98.5582439372691	98.4023933722767	98.157613385574	97.7354953732133	96.8550068942153	94.0628402721832
98.754355252184	98.7428388993452	98.7061750495398	98.6402652810016	98.5366214862525	98.3785540170232	98.1302766825188	97.7020442153591	96.8085661376588	93.9743358469801
98.7356344905227	98.7239561756069	98.6867671171484	98.6199164212433	98.5148021610316	98.3544994432676	98.1026949345921	97.6682937383316	96.761706285938	93.8850045366649
98.7167411725003	98.7048996714227	98.6671811496033	98.5993818865001	98.4927852129473	98.3302288399166	98.074867211667	97.6342427722785	96.7144255946688	93.7948421968516
98.6976746075808	98.6856686957301	98.6474164471511	98.5786609583892	98.470569889336	98.3057413911282	98.0467925777495	97.599890139583	96.666722304867	93.7038446381178
98.6784341019689	98.6662625541951	98.6274723066732	98.5577529149338	98.4481554335004	98.2810362762835	98.0184700909491	97.5652346547144	96.6185946427323	93.6120076258342
98.6591548045384	98.6468177792283	98.607489579313	98.5368064404086	98.4257030720792	98.2562943126185	97.9901120663198	97.5305436201691	96.5704237963986	93.520068666814
98.6397007083314	98.6271969837793	98.5873265556145	98.5156719790862	98.4030506754089	98.2313337079376	97.9615050537438	97.4955482328911	96.5218260646185	93.4272827149742
98.6200711125624	98.6073994664656	98.56698252518	98.4943488011246	98.3801974777355	98.2061536303988	97.9326480961192	97.4602472801324	96.4727995527404	93.333645616473
98.6002653131234	98.5874245225682	98.5464567741727	98.4728361730019	98.3571427091714	98.1807532432608	97.9035402301107	97.4246395374162	96.4233423799349	93.2391531284343
98.5802826025638	98.5672714440108	98.5257485852937	98.4511333574911	98.3338855956666	98.155131704847	97.8741804859863	97.3887237702411	96.3734526700266	93.143800930562
98.56012227007	98.5469395193385	98.5048572377593	98.4292396136341	98.310425358979	98.1292881685064	97.8445678875344	97.3524987351237	96.3231285451077	93.047584633174
98.5397836014458	98.5264280336964	98.4837820072773	98.4071541967155	98.2867612166452	98.1032217825729	97.8147014520281	97.315963180198	96.272368121076	92.9504997827342
98.5192658790912	98.5057362688087	98.4625221660239	98.3848763582363	98.2628923819504	98.0769316903247	97.7845801902148	97.2791158455228	96.2211695045066	92.8525418656326
98.4985683819825	98.4848635029562	98.4410769826198	98.3624053458874	98.2388180638978	98.0504170299455	97.754203106317	97.2419554631973	96.1695307904448	92.7537063107355
98.4776903856507	98.463809010955	98.4194457221068	98.3397404035231	98.2145374671782	98.0236769344869	97.7235691980365	97.2044807573549	96.1174500608382	92.6539884910673
98.4566311621611	98.4425720641347	98.3976276459236	98.3168807711343	98.1900497921391	97.9967105318328	97.692677456555	97.1666904440793	96.0649253834094	92.5533837248776
98.4353899800918	98.4211519303153	98.3756220118815	98.293825684821	98.1653542347535	97.9695169446645	97.6615268665313	97.1285832312764	96.0119548108354	92.4518872762701
98.4139661045122	98.3995478737858	98.3534280741403	98.2705743767658	98.1404499865886	97.9420952904273	97.6301164060903	97.0901578185192	95.9585363801364	92.3494943555161
98.3923587969614	98.3777591552809	98.3310450831839	98.2471260752059	98.115336234775	97.914444681298	97.5984450468065	97.0514128968814	95.9046681122108	92.2462001191393
98.3705673154265	98.3557850319587	98.3084722857952	98.2234800044059	98.0900121619746	97.8865642241525	97.56651175368	97.0123471487657	95.8503480114712	92.141999669832
98.3485909143204	98.3336247573775	98.2857089250316	98.1996353846297	98.0644769463498	97.8584530205335	97.5343154851063	96.9729592477341	95.7955740655477	92.0368880562472
98.3264288444595	98.3112775814726	98.2627542401994	98.1755914321128	98.0387297615314	97.8301101666187	97.5018551928404	96.9332478583415	95.7403442450395	91.9308602726947
98.3044306189622	98.2890965926605	98.2399724927463	98.1517326807192	98.0131876162001	97.8020034313771	97.469680346043	96.8939053169477	95.6856477300617	91.8258427687134
98.2824512357488	98.2669353119019	98.2172125777277	98.1278996253683	97.9876775367232	97.7739387648027	97.4375629261897	96.8546441146882	95.6310731265244	91.7210309887736
98.2604907103368	98.2447937604284	98.1944745265931	98.1040923115847	97.9621995837249	97.7459162361269	97.4055029864615	96.8154642075238	95.5766198529785	91.6164226806676
98.2385490585038	98.222671959676	98.1717583709453	98.0803107849084	97.9367538175039	97.7179359134216	97.3735005762302	96.7763655294222	95.5222872746351	91.5120157586813
98.2166262962841	98.2005699312843	98.1490641425371	98.056555090888	97.911340298018	97.6899978635389	97.3415557404602	96.7373479920719	95.468074723535	91.4078082705156
98.1947224399663	98.1784876970952	98.1263918732675	98.0328252750736	97.8859590848666	97.6621021520337	97.3096685191485	96.6984114855971	95.413981512425	91.3037983729443
98.1728375060902	98.1564252791515	98.1037415951787	98.0091213830092	97.8606102372716	97.6342488430716	97.277838946838	96.6595558798464	95.3600069442763	91.1999843136799
98.1509715114442	98.1343826996959	98.0811133404523	97.9854434602255	97.8352938140572	97.6064379993264	97.2460670522209	96.6207810259765	95.3061503187837	91.096364417678
98.1291244730626	98.1123599811689	98.0585071414056	97.9617915522316	97.8100098736264	97.5786696818694	97.214352857836	96.5820867581524	95.2524109367753	90.9929370766352
98.107296408223	98.0903571462079	98.0359230304882	97.938165704507	97.7847584739362	97.5509439500567	97.1826963798554	96.5434728952521	95.1987881031762	90.8897007408047
98.0854873344438	98.0683742176451	98.0133610402782	97.914565962493	97.7595396724702	97.5232608614149	97.1510976279537	96.5049392425074	95.1452811289709	90.7866539125098
98.0636972694817	98.0464112185059	97.9908212034782	97.8909923715837	97.7343535262086	97.4956204715307	97.1195566052491	96.466485593045	95.0918893324754	90.6837951409159
98.0419262313293	98.0244681720073	97.9683035529114	97.8674449771166	97.7092000915971	97.4680228339444	97.0880733083074	96.4281117293074	95.0386120401312	90.5811230177438
98.0201742382124	98.0025451015557	97.9458081215174	97.8439238243622	97.6840794245135	97.4404680000506	97.0566477271984	96.3898174243485	94.9854485869722	90.4786361737003
97.9984413085882	97.9806420307453	97.9233349423485	97.820428958514	97.6589915802336	97.4129560190067	97.0252798455942	96.3516024430047	94.9323983168654	90.3763332754596
97.9767274611422	97.9587589833557	97.9008840485648	97.7969604246769	97.6339366133951	97.3854869376501	96.993969640904	96.3134665429469	94.8794605825992	90.2742130230775
97.9550327147864	97.9368959833501	97.8784554734298	97.7735182678562	97.6089145779615	97.3580608004247	96.9627170844347	96.2754094756221	94.8266347458661	90.1722741477474
97.9333570886568	97.915053054873	97.8560492503063	97.7501025329448	97.5839255271857	97.3306776493175	96.9315221415728	96.237430987093	94.7739201771771	90.0705154098331
97.9117006021109	97.8932302222479	97.8336654126509	97.7267132647109	97.5589695135728	97.3033375238041	96.900384771982	96.1995308187863	94.7213162557299	89.9689355971275
97.8900632747258	97.871427509975	97.8113039940095	97.7033505077845	97.5340465888439	97.2760404608043	96.869304929811	96.1617087081575	94.6688223692478	89.8675335232993
97.8684451262955	97.8496449427289	97.788965028012	97.6800143066443	97.5091568039	97.2487864946465	96.8382825639085	96.1239643892821	94.6164379138007	89.7663080264961
97.8468461768287	97.8278825453559	97.7666485483668	97.6567047056027	97.4843002087864	97.2215756570414	96.8073176180424	96.0862975933806	94.5641622936164	89.6652579680829
97.8252664465464	97.8061403428715	97.7443545888556	97.6334217487922	97.4594768526585	97.1944079770634	96.7764100311189	96.0487080492856	94.5119949208873	89.5643822314943
97.80370595588	97.7844183604578	97.7220831833276	97.6101654801499	97.434686783749	97.1672834811402	96.7455597374015	96.0111954838562	94.4599352155761	89.4636797211868
97.7821647254684	97.7627166234606	97.699834365693	97.5869359434027	97.4099300493352	97.1402021930495	96.7147666667274	95.9737596223469	94.4079826052228	89.3631493616785
97.7606427761558	97.7410351573869	97.6776081699179	97.5637331820515	97.3852066957092	97.1131641339227	96.684030744719	95.936400188736	94.3561365247558	89.2627900966646
97.7391401289896	97.7193739879013	97.655404630017	97.5405572393561	97.3605167681486	97.0861693222542	96.6533518929916	95.8991169060171	94.3043964163068	89.162600888202
97.7176568052175	97.6977331408237	97.6332237800478	97.5174081583193	97.3358603108894	97.0592177739167	96.6227300293544	95.8619094964598	94.2527617290302	89.0625807159528
97.6961928262858	97.6761126421255	97.6110656541032	97.4942859816706	97.3112373671008	97.0323095021813	96.5921650680053	95.8247776818417	94.2012319189293	88.9627285764833
97.6747482138359	97.6545125179271	97.5889302863054	97.4711907518509	97.286647978861	97.0054445177425	96.5616569197194	95.787721183655	94.1498064486862	88.8630434826102
97.6533229897028	97.6329327944939	97.5668177107979	97.4481225109966	97.2620921871355	96.9786228287464	96.5312054920305	95.7507397232913	94.0984847874994	88.763524462792
97.6319171759122	97.611373498233	97.5447279617394	97.4250813009234	97.2375700317571	96.9518444408232	96.5008106894045	95.7138330222068	94.047266410925	88.6641705605589
97.6105307946776	97.5898346556902	97.5226610732951	97.4020671631109	97.2130815514076	96.9251093571227	96.4704724134075	95.6770008020694	93.996150800725	88.564980833979
97.5891638683982	97.5683162935455	97.5006170796301	97.379080138687	97.188626783601	96.8984175783522	96.440190562865	95.6402427848907	93.9451374447202	88.4659543551577
97.567816419656	97.5468184386103	97.4785960149013	97.3561202684127	97.1642057646695	96.8717691028168	96.4099650340152	95.6035586931436	93.8942258366482	88.3670902097664
97.546488471213	97.5253411178226	97.4565979132497	97.3331875926666	97.13981852975	96.8451639264619	96.3797957206554	95.5669482498678	93.8434154760271	88.2683874965989
97.5251800460085	97.5038843582439	97.4346228087921	97.3102821514307	97.1154651127734	96.818602042917	96.3496825142807	95.5304111787644	93.7927058680231	88.169845327153
97.5038911671567	97.4824481870545	97.4126707356136	97.2874039842753	97.0911455464546	96.7920834435415	96.319625304218	95.4939472042796	93.742096523324	88.0714628252348
97.4826218579429	97.4610326315498	97.390741727759	97.264553130345	97.0668598622851	96.7656081174706	96.2896239777518	95.4575560516806	93.691586958016	87.9732391265848
97.4613721418217	97.4396377191356	97.3688358192246	97.241729628345	97.0426080905262	96.739176051663	96.2596784202453	95.4212374471227	93.6411766934652	87.8751733785228
97.4401420424131	97.4182634773244	97.34695304395	97.2189335165274	97.0183902602046	96.7127872309485	96.2297885152553	95.38499111771	93.5908652562039	87.7772647396122
97.4189315835	97.3969099337302	97.3250934358099	97.1961648326787	96.994206399109	96.6864416380767	96.1999541446411	95.3488167915484	93.5406521778196	87.6795123793399
97.3977407890247	97.3755771160644	97.3032570286053	97.1734236141065	96.9700565337876	96.6601392537655	96.1701751886688	95.3127141977945	93.4905369948487	87.5819154778127
97.3765696830861	97.3542650521312	97.2814438560551	97.1507098976278	96.9459406895482	96.6338800567495	96.1404515261103	95.2766830666974	93.4405192486733	87.4844732254675
97.3554182899363	97.3329737698225	97.2596539517882	97.1280237195573	96.921858890458	96.6076640238294	96.1107830343368	95.2407231296372	93.3905984854219	87.3871848227958
97.3342866339771	97.3117032971135	97.2378873493342	97.1053651156958	96.897811159346	96.5814911299196	96.0811695894083	95.2048341191585	93.3407742558731	87.2900494800803
97.3131747397569	97.2904536620575	97.2161440821157	97.08273412132	96.8737975178053	96.5553613480972	96.0516110661591	95.1690157690002	93.2910461153623	87.1930664171432
97.2920826319672	97.2692248927809	97.1944241834393	97.0601307711719	96.8498179861974	96.5292746496493	96.0221073382776	95.1332678141217	93.2414136236916	87.0962348631061
97.271010335439	97.2480170174786	97.1727276864875	97.0375550994491	96.825872583657	96.5032310041208	95.992658278384	95.0975899907262	93.1918763450429	86.9995540561597
97.2499578751392	97.2268300644081	97.1510546243103	97.0150071397954	96.8019613280978	96.4772303793609	95.9632637581026	95.0619820362811	93.1424338478932	86.9030232433433
97.2289252761671	97.205664061885	97.129405029817	96.9924869252924	96.7780842362191	96.4512727415696	95.9339236481315	95.026443689535	93.0930857049329	86.8066416803337
97.2079125637504	97.1845190382772	97.1077789357676	96.9699944884507	96.7542413235136	96.4253580553432	95.9046378183085	94.9909746905334	93.0438314929865	86.7104086312424
97.1869197632419	97.163395022	97.0861763747649	96.9475298612027	96.7304326042753	96.3994862837192	95.8754061376736	94.9555747806318	92.9946707929358	86.6143233684208
97.1659469001149	97.1422920415105	97.0645973792466	96.9250930748946	96.7066580916087	96.3736573882203	95.8462284745289	94.9202437025067	92.9456031896453	86.5183851722731
97.1449939999601	97.1212101253019	97.0430419814769	96.9026841602803	96.6829177974381	96.3478713288982	95.817104696495	94.8849812001647	92.8966282718901	86.4225933310768
97.124061088481	97.1001493018986	97.0215102135389	96.8803031475146	96.6592117325181	96.3221280643758	95.7880346705652	94.8497870189506	92.8477456322857	86.3269471408089
97.10314819149	97.0791095998502	97.0000021073268	96.8579500661473	96.6355399064442	96.2964275518891	95.7590182631566	94.8146609055534	92.7989548672196	86.2314459049798
97.0822553349044	97.0580910477258	96.9785176945381	96.8356249451183	96.6119023276641	96.2707697473282	95.7300553401588	94.7796026080109	92.7502555767858	86.1360889344724
97.061382544742	97.0370936741092	96.9570570066662	96.8133278127519	96.588299003489	96.2451546052774	95.7011457669805	94.7446118757137	92.70164736472	86.0408755473873
97.0405298471171	97.0161175075921	96.935620074993	96.791058696753	96.5647299401062	96.2195820790542	95.6722894085935	94.7096884594077	92.6531298383373	85.9458050688931
97.0196972682359	96.9951625767695	96.9142069305816	96.7688176242028	96.5411951425911	96.1940521207481	95.6434861295748	94.674832111195	92.604702608472	85.8508768310825
96.9988848343924	96.9742289102334	96.892817604269	96.7466046215549	96.5176946149205	96.1685646812577	95.6147357941467	94.6400425845351	92.5563652894178	85.7560901728329
96.9780925719638	96.9533165365673	96.8714521266597	96.7244197146326	96.494228359985	96.1431197103277	95.5860382662146	94.605319634244	92.508117498871	85.6614444396716
96.9573205074059	96.9324254843402	96.850110528118	96.7022629286254	96.470796379603	96.1177171565845	95.5573934094033	94.5706630164935	92.4599588578746	85.5669389836456
96.9365686672489	96.9115557821016	96.8287928387622	96.6801342880874	96.4473986745338	96.0923569675713	95.5288010870918	94.536072488809	92.4118889907635	85.4725731631958
96.9158370780925	96.8907074583749	96.8074990884575	96.6580338169347	96.4240352444918	96.0670390897821	95.5002611624458	94.5015478100675	92.3639075251122	85.3783463430351
96.8951257666016	96.8698805416523	96.78622930681	96.635961538444	96.4007060881598	96.0417634686951	95.4717734984491	94.4670887404938	92.316014091683	85.2842578940301
96.874434759501	96.8490750603888	96.7649835231602	96.6139174752509	96.377411203204	96.0165300488052	95.4433379579334	94.4326950416574	92.2682083243755	85.1903071930871
96.8537640835713	96.8282910429968	96.7437617665774	96.5919016493497	96.3541505862872	95.9913387736555	95.4149544036068	94.3983664764685	92.2204898601782	85.0964936230408
96.8331137656441	96.80752851784	96.7225640658533	96.5699140820921	96.330924233084	95.9661895858683	95.3866226980806	94.364102809173	92.1728583391206	85.0028165725473
96.8124838325967	96.7867875132278	96.701390449497	96.5479547941873	96.3077321382946	95.9410824271751	95.3583427038954	94.3299038053477	92.1253134042263	84.9092754359795
96.7918743113475	96.7660680574102	96.6802409457288	96.5260238057016	96.2845742956594	95.916017238446	95.3301142835453	94.2957692318951	92.0778547014685	84.8158696133258
96.7712852288516	96.7453701785716	96.6591155824756	96.5041211360594	96.2614506979736	95.890993959718	95.3019372995013	94.2616988570375	92.0304818797249	84.7225985100924
96.750716612095	96.7246939048252	96.638014387365	96.4822468040431	96.2383613371017	95.8660125302233	95.2738116142339	94.2276924503113	91.9831945907352	84.6294615372071
96.7301684880904	96.7040392642079	96.6169373877208	96.4604008277946	96.2153062039915	95.8410728884158	95.2457370902341	94.1937497825603	91.9359924890586	84.5364581109275
96.7096408838721	96.6834062846745	96.5958846105581	96.438583224816	96.1922852886892	95.8161749719977	95.2177135900337	94.1598706259298	91.8888752320328	84.4435876527499
96.6891338264907	96.6627949940923	96.5748560825784	96.416794011971	96.1692985803537	95.7913187179454	95.1897409762243	94.1260547538593	91.8418424797337	84.3508495893225
96.6686473430085	96.6422054202354	96.5538518301658	96.3950332054873	96.1463460672706	95.7665040625342	95.1618191114762	94.092301941076	91.7948938949364	84.2582433523597
96.6481814604943	96.6216375907798	96.5328718793818	96.3733008209573	96.1234277368671	95.7417309413625	95.1339478585556	94.0586119635872	91.7480291430768	84.1657683785594
96.6277362060182	96.6010915332977	96.5119162559618	96.3515968733413	96.1005435757258	95.7169992893759	95.1061270803412	94.0249845986736	91.701247892214	84.0734241095221
96.6073116066472	96.5805672752524	96.4909849853109	96.329921376969	96.0776935695992	95.6923090408898	95.0783566398404	93.9914196248816	91.6545498129938	83.9812099916727
96.5869076894395	96.5600648439929	96.4700780925003	96.3082743455428	96.0548777034239	95.6676601296121	95.0506364002041	93.9579168220155	91.607934578613	83.8891254761833
96.5665244814397	96.5395842667492	96.4491956022635	96.2866557921397	96.0320959613343	95.6430524886648	95.0229662247415	93.9244759711304	91.5614018647842	83.7971700188994
96.5461620096739	96.5191255706263	96.4283375389928	96.2650657292149	96.0093483266766	95.6184860506055	94.9953459769336	93.891096854524	91.5149513497018	83.7053430802668
96.5258203011445	96.4986887826001	96.4075039267364	96.2435041686043	95.9866347820229	95.5939607474476	94.9677755204465	93.857779255729	91.4685827140085	83.6136441252606
96.5054993828254	96.478273929512	96.3866947891945	96.2219711215283	95.9639553091847	95.5694765106806	94.9402547191437	93.8245229595048	91.4222956407621	83.5220726233168
96.4851992816564	96.4578810380638	96.3659101497172	96.2004665985948	95.9413098892262	95.54503327129	94.912783437098	93.7913277518303	91.3760898154042	83.4306280482642
96.4649200245391	96.4375101348132	96.3451500313009	96.1789906098026	95.9186985024783	95.5206309597756	94.8853615386031	93.7581934198951	91.329964925728	83.3393098782591
96.4446616383311	96.417161246169	96.3244144565865	96.1575431645457	95.8961211285515	95.4962695061705	94.8579888881842	93.7251197520916	91.2839206618484	83.2481175957211
96.4244241498415	96.396834398386	96.3037034478558	96.1361242716164	95.8735777463491	95.4719488400589	94.8306653506082	93.6921065380072	91.2379567161711	83.1570506872705
96.4042075858256	96.3765296175609	96.28301702703	96.1147339392098	95.8510683340804	95.4476688905934	94.8033907908936	93.659153568416	91.1920727833638	83.0661086436671
96.3840119729805	96.3562469296275	96.2623552156673	96.0933721749274	95.8285928692735	95.4234295865125	94.7761650743197	93.6262606352704	91.1462685603267	82.9752909597504
96.3638373379394	96.3359863603522	96.2417180349604	96.0720389857816	95.8061513287882	95.3992308561567	94.7489880664357	93.5934275316935	91.1005437461648	82.8845971343816
96.3436837072675	96.3157479353295	96.221105505735	96.0507343781995	95.7837436888283	95.3750726274846	94.7218596330688	93.5606540519701	91.05489804216	82.7940266703864
96.3235511074567	96.2955316799779	96.2005176484479	96.0294583580278	95.761369924954	95.350954828089	94.6947796403324	93.5279399915394	91.0093311517436	82.7035790744994
96.3034395649207	96.2753376195357	96.1799544831853	96.0082109305368	95.7390300120947	95.3268773852114	94.6677479546339	93.4952851469863	90.9638427804701	82.6132538573094
96.2833491059907	96.2551657790565	96.1594160296612	95.9869921004253	95.7167239245606	95.3028402257575	94.6407644426814	93.4626893160334	90.9184326359909	82.5230505332067
96.2632797569102	96.2350161834054	96.138902307216	95.9658018718248	95.6944516360548	95.2788432763112	94.6138289714911	93.4301522975328	90.8731004280286	82.4329686203305
96.2432315438303	96.214888857255	96.1184133348153	95.9446402483041	95.6722131196852	95.2548864631486	94.5869414083937	93.3976738914581	90.827845868352	82.3430076405182
96.2232044928053	96.1947838250813	96.0979491310488	95.9235072328745	95.6500083479762	95.230969712252	94.5601016210404	93.3652538988959	90.7826686707517	82.2531671192559
96.2031986297879	96.1747011111601	96.077509714129	95.9024028279943	95.6278372928801	95.2070929493224	94.5333094774089	93.3328921220385	90.7375685510153	82.163446585629
96.1832139806246	96.154640739563	96.0570951018907	95.8813270355736	95.6056999257882	95.1832560997934	94.5065648458093	93.300588364175	90.6925452269043	82.073845572275
96.1632505710512	96.1346027341538	96.0367053117897	95.860279856979	95.5835962175425	95.1594590888427	94.4798675948888	93.2683424296837	90.6475984181305	81.9843636153367
96.1433084266882	96.1145871185852	96.0163403609026	95.8392612930389	95.5615261384462	95.1357018414049	94.4532175936371	93.2361541240243	90.6027278463332	81.8950002544161
96.1233875730365	96.094593916295	95.9960002659258	95.8182713440484	95.5394896582749	95.1119842821834	94.4266147113912	93.2040232537295	90.557933235057	81.8057550325301
96.103488035473	96.0746231505025	95.9756850431751	95.797310009774	95.5174867462871	95.0883063356615	94.4000588178396	93.1719496263975	90.5132143097293	81.7166274960664
96.0836098392461	96.0546748442057	95.9553947085859	95.7763772894587	95.4955173712346	95.064667926114	94.3735497830265	93.1399330506837	90.4685707976392	81.6276171947405
96.0637530094715	96.0347490201778	95.9351292777119	95.7554731818274	95.4735815013733	95.0410689776179	94.3470874773564	93.1079733362934	90.4240024279158	81.5387236815536
96.0439175711281	96.0148457009639	95.9148887657259	95.7345976850914	95.4516791044732	95.0175094140631	94.3206717715973	93.0760702939736	90.3795089315076	81.4499465127511
96.0241035490536	95.9949649088779	95.894673187419	95.7137507969541	95.429810147828	94.9939891591625	94.2943025368844	93.0442237355054	90.3350900411623	81.3612852477828
96.0043109679404	95.975106666	95.8744825572012	95.6929325146155	95.407974598266	94.9705081364624	94.2679796447234	93.0124334736965	90.2907454914057	81.2727394492622
95.9845398523317	95.955270994173	95.8543168891011	95.672142834778	95.3861724221588	94.9470662693522	94.241702966994	92.9806993223732	90.2464750185232	81.1843086829287
95.9647902266175	95.9354579150003	95.8341761967662	95.6513817536506	95.3644035854316	94.9236634810733	94.2154723759525	92.9490210963732	90.2022783605392	81.0959925176087
95.9450621150303	95.9156674498425	95.8140604934631	95.6306492669551	95.3426680535725	94.9002996947294	94.1892877442346	92.9173986115378	90.1581552571988	81.0077905251783
95.9253555416417	95.895899619815	95.7939697920781	95.6099453699304	95.3209657916413	94.8769748332943	94.1631489448584	92.8858316847045	90.1141054499484	80.9197022805267
95.9056705303583	95.8761544457856	95.7739041051176	95.5892700573378	95.2992967642794	94.8536888196216	94.1370558512263	92.8543201336996	90.0701286819179	80.8317273615205
95.8860071049181	95.8564319483714	95.7538634447082	95.5686233234665	95.2776609357184	94.8304415764527	94.1110083371276	92.8228637773307	90.0262246979018	80.7438653489676
95.8663652888865	95.8367321479373	95.7338478225978	95.5480051621384	95.2560582697887	94.807233026425	94.0850062767407	92.7914624353797	89.982393244342	80.6561158265831
95.8467451056531	95.8170550645926	95.7138572501559	95.5274155667133	95.2344887299288	94.7840630920805	94.0590495446347	92.7601159285951	89.9386340693098	80.5684783809553
95.8271465784279	95.7974007181897	95.6938917383747	95.5068545300938	95.2129522791935	94.7609316958728	94.0331380157717	92.7288240786851	89.8949469224888	80.4809526015116
95.8075697302378	95.7777691283213	95.6739512978696	95.486322044731	95.191448880262	94.7378387601753	94.0072715655082	92.6975867083104	89.8513315551578	80.3935380804865
95.7880145839233	95.7581603143186	95.6540359388799	95.4658181026286	95.169978495447	94.7147842072884	93.9814500695967	92.666403641077	89.8077877201742	80.3062344128888
95.7684811621349	95.7385742952489	95.6341456712704	95.4453426953491	95.1485410867021	94.6917679594469	93.9556734041871	92.6352747015292	89.7643151719577	80.2190411964702
95.7489694873303	95.7190110899142	95.6142805045316	95.4248958140179	95.1271366156301	94.6687899388266	93.9299414458282	92.6041997151426	89.7209136664736	80.1319580316942
95.7294795817704	95.6994707168489	95.5944404477814	95.4044774493288	95.1057650434909	94.6458500675512	93.9042540714687	92.5731785083173	89.6775829612173	80.0449845217052
95.710011467517	95.6799531943181	95.5746255097656	95.384087591549	95.0844263312091	94.6229482676993	93.8786111584585	92.5422109083708	89.6343228151986	79.958120272299
95.6905651664292	95.660458540316	95.5548356988595	95.3637262305238	95.0631204393817	94.6000844613105	93.8530125845493	92.5112967435313	89.5911329889261	79.871364891893
95.6711407001603	95.6409867725641	95.5350710230692	95.3433933556821	95.0418473282856	94.5772585703915	93.827458227896	92.4804358429311	89.548013244392	79.7847179914972
95.6517380901554	95.6215379085097	95.5153314900323	95.3230889560406	95.0206069578848	94.5544705169227	93.8019479670571	92.4496280365996	89.5049633450574	79.6981791846857
95.6323573576477	95.6021119653243	95.4956171070198	95.3028130202093	94.9993992878377	94.5317202228638	93.7764816809953	92.4188731554568	89.4619830558371	79.611748087569
95.6129985236567	95.5827089599023	95.475927880937	95.2825655363963	94.9782242775044	94.5090076101593	93.7510592490786	92.3881710313068	89.4190721430857	79.5254243187658
95.5936616089844	95.5633289088596	95.4562638183254	95.2623464924124	94.9570818859532	94.4863326007447	93.7256805510801	92.357521496831	89.3762303745828	79.4392074993767
95.5743466342136	95.5439718285321	95.4366249253635	95.242155875676	94.935972071968	94.4636951165516	93.7003454671792	92.326924385582	89.3334575195191	79.353097252957
95.5550536197045	95.5246377349748	95.4170112078689	95.2219936732182	94.9148947940545	94.4410950795127	93.6750538779612	92.2963795319768	89.2907533484827	79.2670932054907
95.5357825855927	95.5053266439604	95.3974226712994	95.2018598716871	94.8938500104472	94.4185324115677	93.6498056644181	92.2658867712907	89.2481176334451	79.1811949853647
95.5165335517863	95.4860385709781	95.377859320755	95.1817544573529	94.8728376791159	94.3960070346677	93.6246007079485	92.2354459396507	89.2055501477481	79.0954022233436
95.4973065379641	95.4667735312331	95.3583211609789	95.1616774161124	94.8518577577718	94.3735188707801	93.5994388903577	92.2050568740299	89.1630506660904	79.0097145525444
95.4781015635726	95.447531539645	95.3388081963598	95.1416287334937	94.8309102038739	94.3510678418938	93.574320093858	92.1747194122402	89.1206189645145	78.9241316084125
95.4589186478243	95.4283126108472	95.3193204309329	95.1216083946611	94.8099949746354	94.3286538700231	93.5492442010684	92.1444333929272	89.0782548203939	78.838653028697
95.4397578096949	95.409116759186	95.2998578683824	95.1016163844192	94.7891120270293	94.3062768772128	93.5242110950147	92.1141986555637	89.0359580124202	78.7532784534275
95.4206190679219	95.3899439987199	95.2804205120423	95.0816526872177	94.7682613177948	94.2839367855423	93.4992206591292	92.0840150404434	88.9937283205911	78.6680075248901
95.401502441002	95.3707943432188	95.2610083648989	95.0617172871562	94.747442803443	94.2616335171297	93.4742727772507	92.0538823886754	88.9515655261974	78.5828398876049
95.3824079471891	95.3516678061633	95.2416214295925	95.0418101679882	94.7266564402623	94.2393669941362	93.449367333624	92.023800542178	88.9094694118116	78.4977751883031
95.3633356044929	95.3325644007442	95.2222597084186	95.0219313131258	94.7059021843248	94.2171371387697	93.4245042128997	91.9937693436727	88.8674397612751	78.4128130759047
95.3442854306764	95.3134841398619	95.2029232033307	95.0020807056444	94.6851799914908	94.1949438732891	93.399683300134	91.9637886366788	88.825476359687	78.3279532014964
95.3252574432545	95.2944270361259	95.1836119159414	94.9822583282864	94.6644898174153	94.1727871200079	93.3749044807879	91.9338582655072	88.7835789933924	78.2431952183104
95.3062516594921	95.2753931018542	95.1643258475245	94.9624641634662	94.6438316175526	94.1506668012977	93.3501676407272	91.9039780752548	88.7417474499706	78.1585387817026
95.2872680964024	95.2563823490735	95.1450649990172	94.942698193274	94.6232053471619	94.1285828395921	93.3254726662216	91.8741479117989	88.699981518224	78.0739835491318
95.2683067707456	95.2373947895179	95.1258293710216	94.9229603994807	94.6026109613123	94.1065351573897	93.3008194439443	91.8443676217917	88.6582809881669	77.9895291801392
95.2493676990269	95.2184304346297	95.106618963807	94.9032507635412	94.5820484148879	94.084523677258	93.2762078609715	91.8146370526543	88.6166456510144	77.9051753363278
95.2304508974953	95.1994892955584	95.0874337773115	94.8835692665995	94.5615176625929	94.0625483218363	93.2516378047815	91.7849560525718	88.5750752991717	77.8209216813424
95.2115563821422	95.1805713831608	95.0682738111446	94.8639158894923	94.5410186589563	94.0406090138391	93.2271091632544	91.7553244704872	88.5335697262232	77.7367678808498
95.1926841687	95.1616767080009	95.0491390645885	94.8442906127535	94.5205513583367	94.0187056760588	93.202621824671	91.7257421560964	88.492128726922	77.6527136025195
95.1738342726405	95.1428052803498	95.0300295366004	94.8246934166177	94.5001157149273	93.9968382313693	93.1781756777124	91.6962089598427	88.4507520971795	77.5687585160043
95.1550067091743	95.1239571101858	95.010945225815	94.8051242810249	94.4797116827601	93.9750066027283	93.153770611459	91.6667247329115	88.4094396340549	77.4849022929214
95.136201493249	95.1051322071938	94.9918861305455	94.7855831856239	94.4593392157108	93.9532107131805	93.1294065153898	91.6372893272249	88.3681911357454	77.401144606834
95.1174186395485	95.0863305807665	94.9728522487868	94.7660701097769	94.4389982675029	93.9314504858602	93.1050832793814	91.6079025954367	88.3270064015758	77.3174851332324
95.0986581624916	95.0675522400032	94.9538435782168	94.7465850325627	94.4186887917125	93.9097258439941	93.0808007937073	91.5785643909269	88.2858852319889	77.2339235495166
95.0799200762313	95.0487971937112	94.9348601161988	94.7271279327812	94.3984107417723	93.8880367109036	93.0565589490369	91.5492745677971	88.2448274285355	77.1504595349779
95.0612043946537	95.0300654504049	94.9159018597835	94.7076987889568	94.3781640709759	93.8663830100078	93.0323576364346	91.5200329808648	88.2038327938648	77.0670927707811
95.042511131377	95.0113570183069	94.8969688057111	94.6882975793425	94.3579487324819	93.8447646648253	93.008196747359	91.4908394856587	88.162901131715	76.9838229399481
95.0238402997511	94.9926719053476	94.8780609504136	94.6689242819235	94.3377646793182	93.823181598977	92.9840761736614	91.4616939384137	88.1220322469038	76.9006497273396
95.0051919128561	94.9740101191661	94.8591782900165	94.6495788744209	94.3176118643857	93.8016337361884	92.9599958075857	91.4325961960657	88.0812259453191	76.8175728196391
94.9865659835022	94.9553716671102	94.8403208203414	94.6302613342957	94.2974902404622	93.7801210002916	92.9359555417663	91.4035461162472	88.04048203391	76.7345919053356
94.9679625242289	94.9367565562368	94.8214885369077	94.6109716387519	94.2773997602068	93.7586433152276	92.911955269228	91.3745435572818	87.9998003206777	76.6517066747078
94.949381547304	94.9181647933125	94.8026814349352	94.5917097647407	94.2573403761629	93.7372006050483	92.8879948833842	91.3455883781799	87.9591806146661	76.5689168198073
94.9308230647235	94.8995963848139	94.7838995093458	94.5724756889634	94.2373120407626	93.7157927939187	92.8640742780362	91.3166804386337	87.9186227259538	76.4862220344429
94.9122870882108	94.8810513369284	94.7651427547658	94.5532693878758	94.2173147063297	93.6944198061185	92.8401933473723	91.2878195990124	87.8781264656449	76.403622014165
94.8937736292163	94.8625296555544	94.7464111655283	94.5340908376909	94.1973483250841	93.6730815660447	92.8163519859661	91.2590057203577	87.8376916458603	76.3211164562496
94.875282698917	94.8440313463019	94.7277047356749	94.5149400143828	94.1774128491444	93.6517779982126	92.7925500887756	91.2302386643789	87.7973180797295	76.2387050596834
94.8568143082161	94.8255564144935	94.7090234589583	94.49581689369	94.157508230532	93.6305090272582	92.7687875511423	91.2015182934488	87.757005581382	76.1563875251482
94.8383684677426	94.8071048651645	94.6903673288441	94.4767214511187	94.1376344211744	93.6092745779396	92.7450642687896	91.1728444705983	87.7167539659392	76.0741635550064
94.8199451878511	94.788676703064	94.671736338513	94.4576536619465	94.1177913729083	93.5880745751389	92.7213801378222	91.1442170595127	87.676563049506	75.992032853286
94.8015444786217	94.7702719326553	94.6531304808635	94.4386135012251	94.0979790374828	93.5669089438638	92.6977350547239	91.1156359245268	87.6364326491627	75.9099951256658
94.7831663498594	94.7518905581171	94.6345497485131	94.4196009437843	94.0781973665632	93.5457776092489	92.6741289163576	91.0871009306204	87.5963625829573	75.8280500794616
94.7648108110944	94.7335325833435	94.6159941338013	94.4006159642345	94.0584463117334	93.5246804965577	92.6505616199632	91.0586119434142	87.5563526698972	75.7461974236116
94.7464778715819	94.7151980119455	94.5974636287914	94.3816585369707	94.0387258244995	93.5036175311836	92.6270330631565	91.0301688291652	87.5164027299419	75.6644368686625
94.7281675403015	94.6968868472515	94.5789582252726	94.3627286361748	94.0190358562925	93.4825886386515	92.6035431439282	91.0017714547624	87.4765125839945	75.5827681267555
94.7098798259582	94.6785990923083	94.5604779147624	94.3438262358196	93.9993763584717	93.4615937446195	92.5800917606426	90.9734196877224	87.4366820538949	75.501190911613
94.6916147369814	94.6603347498817	94.5420226885085	94.3249513096713	93.9797472823272	93.4406327748796	92.5566788120361	90.9451133961856	87.396910962412	75.4197049385249
94.6733722815256	94.6420938224578	94.5235925374912	94.3061038312927	93.960148579083	93.4197056553596	92.5333041972161	90.9168524489114	87.3571991332358	75.3383099243352
94.6551524674704	94.6238763122434	94.5051874524251	94.2872837740464	93.9405801998996	93.3988123121239	92.5099678156596	90.8886367152744	87.3175463909707	75.257005587429
94.6369553024203	94.6056822211676	94.4868074237621	94.2684911110976	93.9210420958772	93.377952671375	92.4866695672118	90.8604660652602	87.2779525611278	75.1757916477195
94.6187807937054	94.5875115508822	94.4684524416925	94.2497258154172	93.901534218058	93.3571266594545	92.4634093520853	90.8323403694611	87.2384174701179	75.0946678266352
94.6006289483812	94.5693643027629	94.450122496148	94.2309878597847	93.8820565174289	93.3363342028441	92.4401870708582	90.8042594990725	87.1989409452443	75.0136338471073
94.582499773229	94.5512404779106	94.4318175768032	94.2122772167911	93.8626089449243	93.3155752281673	92.417002624473	90.7762233258881	87.1595228146959	74.9326894335566
94.5643932747564	94.5331400771519	94.4135376730783	94.1935938588416	93.8431914514288	93.2948496621895	92.3938559142351	90.7482317222967	87.1201629075401	74.8518343118823
94.5463094591971	94.5150631010407	94.3952827741408	94.1749377581586	93.8238039877792	93.2741574318196	92.370746841812	90.7202845612778	87.0808610537159	74.7710682094487
94.5282483325118	94.4970095498588	94.3770528689077	94.1563088867846	93.8044465047675	93.2534984641112	92.3476753092313	90.6923817163978	87.0416170840274	74.6903908550736
94.5102099003885	94.4789794236175	94.3588479460478	94.1377072165848	93.785118953143	93.2328726862628	92.3246412188796	90.6645230618058	87.0024308301366	74.6098019790166
94.4921941682424	94.4609727220581	94.3406679939837	94.1191327192498	93.7658212836148	93.2122800256192	92.3016444735015	90.6367084722304	86.9633021245572	74.5293013129667
94.4742011412172	94.4429894446538	94.3225130008939	94.1005853662984	93.7465534468543	93.1917204096723	92.2786849761974	90.6089378229753	86.924230800648	74.4488885900315
94.4562308241849	94.4250295906101	94.3043829547149	94.0820651290803	93.7273153934971	93.1711937660619	92.2557626304232	90.5812109899156	86.885216692606	74.3685635447249
94.4382832217468	94.4070931588666	94.2862778431433	94.0635719787787	93.7081070741458	93.1507000225765	92.2328773399881	90.5535278494943	86.8462596354605	74.2883259129564
94.4203583382335	94.3891801480978	94.2681976536378	94.0451058864128	93.6889284393716	93.130239107154	92.2100290090534	90.5258882787183	86.8073594650664	74.2081754320192
94.4024561777061	94.3712905567145	94.2501423734216	94.0266668228406	93.6697794397169	93.1098109478824	92.1872175421316	90.4982921551549	86.7685160180979	74.12811184058
94.3845767439565	94.3534243828647	94.2321119894839	94.0082547587613	93.6506600256974	93.0894154730008	92.1644428440844	90.4707393569277	86.7297291320426	74.048134878667
94.366720040508	94.3355816244356	94.2141064885826	93.9898696647179	93.6315701478041	93.0690526108998	92.1417048201218	90.4432297627139	86.6909986451951	73.9682442876601
94.3488860706161	94.317762279054	94.1961258572461	93.9715115110995	93.6125097565052	93.0487222901222	92.1190033758003	90.4157632517395	86.6523243966509	73.8884398102793
94.3310748372691	94.2999663440878	94.178170081775	93.9531802681441	93.5934788022484	93.0284244393635	92.0963384170219	90.3883397037767	86.6137062263005	73.8087211905747
94.3132863431889	94.2821938166479	94.1602391482448	93.9348759059408	93.5744772354628	93.0081589874729	92.0737098500324	90.3609589991398	86.5751439748234	73.7290881739158
94.2955205908317	94.2644446935885	94.1423330425075	93.9165983944324	93.5555050065606	92.9879258634533	92.0511175814205	90.3336210186821	86.5366374836823	73.6495405069811
94.2777775823887	94.2467189715092	94.1244517501936	93.8983477034172	93.5365620659394	92.9677249964626	92.0285615181157	90.3063256437919	86.498186595117	73.5700779377482
94.2600573197872	94.229016646756	94.1065952567145	93.8801238025524	93.5176483639839	92.9475563158132	92.0060415673875	90.2790727563895	86.459791152139	73.4907002154831
94.2423598046908	94.2113377154226	94.088763547264	93.8619266613553	93.4987638510674	92.9274197509734	91.9835576368439	90.2518622389236	86.4214509985255	73.4114070907308
94.2246850385011	94.1936821733519	94.0709566068208	93.8437562492064	93.4799084775542	92.9073152315675	91.9611096344296	90.224693974368	86.3831659788141	73.3321983153051
94.207033022358	94.1760500161371	94.0531744201501	93.8256125353513	93.4610821938011	92.8872426873762	91.9386974684253	90.197567846218	86.3449359382967	73.2530736422788
94.1894037571404	94.1584412391235	94.035416971806	93.807495488903	93.4422849501589	92.8672020483369	91.9163210474458	90.1704837384873	86.3067607230145	73.1740328259742
94.1717972434677	94.1408558374094	94.0176842461328	93.7894050788443	93.4235166969744	92.8471932445447	91.8939802804389	90.1434415357046	86.2686401797521	73.0950756219535
94.1542134817004	94.1232938058477	93.9999762272679	93.7713412740295	93.404777384592	92.827216206252	91.8716750766835	90.1164411229103	86.2305741560325	73.016201787009
94.1366524719412	94.1057551390474	93.9822928991428	93.7533040431873	93.3860669633553	92.8072708638692	91.8494053457892	90.0894823856534	86.1925625001114	72.9374110791544
94.1191142140356	94.0882398313749	93.964634245486	93.7352933549223	93.3673853836089	92.7873571479654	91.8271709976938	90.0625652099879	86.1546050609719	72.8587032576151
94.1015987075734	94.0707478769553	93.9470002498239	93.7173091777173	93.3487325956994	92.767474989268	91.8049719426627	90.0356894824701	86.1167016883197	72.7800780828188
94.0841059518894	94.0532792696739	93.9293908954838	93.6993514799357	93.3301085499778	92.7476243186635	91.7828080912872	90.008855090155	86.0788522325773	72.7015353163873
94.0666359460644	94.0358340031778	93.9118061655949	93.6814202298231	93.3115131968003	92.7278050671976	91.7606793544832	89.9820619205934	86.0410565448792	72.6230747211265
94.0491886889266	94.0184120708771	93.8942460430909	93.6635153955096	93.2929464865302	92.7080171660755	91.7385856434898	89.9553098618285	86.0033144770669	72.5446960610186
94.0317641790522	94.0010134659464	93.8767105107115	93.6456369450117	93.2744083695391	92.6882605466622	91.7165268698678	89.9285988023934	85.9656258816836	72.4663991012123
94.0143624147667	93.9836381813264	93.8591995510044	93.6277848462346	93.2558987962086	92.6685351404825	91.6945029454987	89.9019286313073	85.9279906119692	72.3881836080149
93.9969833941462	93.966286209725	93.8417131463272	93.6099590669736	93.2374177169314	92.6488408792215	91.672513782583	89.8752992380728	85.8904085218556	72.3100493488836
93.979627115018	93.9489575436192	93.8242512788495	93.5921595749166	93.2189650821131	92.6291776947246	91.6505592936386	89.8487105126729	85.8528794659617	72.2319960924164
93.9622935749623	93.9316521752561	93.8068139305541	93.5743863376458	93.2005408421731	92.6095455189976	91.6286393915003	89.8221623455682	85.8154032995886	72.1540236083446
93.9449827713128	93.914370096655	93.7894010832397	93.5566393226395	93.1821449475462	92.5899442842071	91.6067539893174	89.7956546276934	85.7779798787146	72.0761316675238
93.9276947011584	93.8971112996081	93.7720127185221	93.538918497274	93.1637773486838	92.5703739226804	91.5849030005531	89.7691872504546	85.7406090599907	71.998320041926
93.9104293613439	93.8798757756825	93.7546488178364	93.5212238288259	93.1454379960554	92.5508343669058	91.5630863389827	89.7427601057267	85.7032907007358	71.9205885046316
93.8931867484715	93.8626635162217	93.7373093624387	93.5035552844731	93.1271268401494	92.5313255495327	91.5413039186926	89.71637308585	85.666024658932	71.8429368298207
93.8759668589017	93.8454745123467	93.7199943334078	93.4859128312974	93.1088438314749	92.5118474033714	91.5195556540786	89.6900260836276	85.6288107932202	71.7653647927658
93.858769688755	93.8283087549579	93.7027037116472	93.4682964362859	93.0905889205623	92.4923998613936	91.4978414598447	89.6637189923226	85.591648962895	71.6878721698238
93.8415952339124	93.8111662347363	93.6854374778867	93.4507060663327	93.0723620579651	92.4729828567322	91.4761612510019	89.6374517056549	85.554539027901	71.6104587384278
93.8244434900173	93.7940469421451	93.6681956126845	93.4331416882411	93.0541631942605	92.4535963226814	91.4545149428665	89.611224117799	85.5174808488277	71.5331242770798
93.8073144524763	93.7769508674314	93.6509780964286	93.4156032687247	93.0359922800511	92.4342401926969	91.4329024510592	89.5850361233805	85.4804742869051	71.4558685653429
93.7902081164609	93.7598780006273	93.6337849093388	93.3980907744097	93.0178492659654	92.4149144003957	91.4113236915034	89.5588876174739	85.4435192039997	71.3786913838335
93.7731244769081	93.7428283315517	93.6166160314682	93.380604171836	92.9997341026595	92.3956188795561	91.3897785804241	89.5327784955997	85.4066154626097	71.3015925142142
93.7560635285224	93.7258018498116	93.5994714427055	93.3631434274595	92.9816467408177	92.376353564118	91.3682670343465	89.5067086537215	85.3697629258609	71.2245717391861
93.7390252657766	93.7087985448038	93.5823511227759	93.3457085076534	92.9635871311538	92.3571183881825	91.3467889700944	89.4806779882436	85.3329614575026	71.1476288424816
93.7220096829131	93.6918184057164	93.5652550512437	93.3282993787096	92.9455552244121	92.3379132860122	91.3253443047896	89.4546863960079	85.296210921903	71.0707636088569
93.7050167739457	93.6748614215302	93.5481832075133	93.3109160068408	92.9275509713684	92.3187381920311	91.3039329558496	89.4287337742918	85.2595111840453	70.9939758240852
93.68804653266	93.65792758102	93.5311355708312	93.2935583581819	92.909574322831	92.2995930408242	91.2825548409872	89.4028200208051	85.2228621095234	70.917265274949
93.6710989526158	93.6410168727568	93.5141121202879	93.2762263987914	92.8916252296417	92.2804777671382	91.2612098782087	89.3769450336877	85.1862635645379	70.8406317492337
93.6541740271475	93.6241292851083	93.4971128348192	93.2589200946531	92.8737036426765	92.2613923058806	91.2398979858126	89.3511087115067	85.149715415892	70.7640750357201
93.6372717493659	93.6072648062414	93.4801376932079	93.2416394116777	92.8558095128472	92.2423365921201	91.2186190823884	89.3253109532541	85.1132175309873	70.6875949241775
93.6203921121596	93.5904234241231	93.4631866740858	93.2243843157043	92.8379427911014	92.2233105610865	91.1973730868154	89.2995516583441	85.07676977782	70.6111912053572
93.6035351081961	93.5736051265222	93.4462597559352	93.2071547725018	92.8201034284242	92.2043141481705	91.1761599182613	89.2738307266107	85.040372024977	70.5348636709855
93.586700729923	93.5568099010107	93.4293569170901	93.1899507477702	92.8022913758387	92.1853472889234	91.1549794961808	89.2481480583049	85.0040241416317	70.4586121137568
93.5698889695699	93.5400377349655	93.4124781357386	93.1727722071426	92.7845065844068	92.1664099190576	91.1338317403145	89.2225035540927	84.9677259975404	70.3824363273273
93.5530998191495	93.5232886155699	93.3956233899239	93.1556191161862	92.7667490052305	92.1475019744459	91.1127165706876	89.1968971150519	84.931477463038	70.3063361063079
93.5363332704584	93.5065625298147	93.3787926575462	93.1384914404039	92.7490185894519	92.1286233911213	91.0916339076086	89.1713286426706	84.8952784090349	70.2303112462583
93.5195893150797	93.4898594645002	93.3619859163642	93.1213891452357	92.7313152882552	92.1097741052775	91.0705836716679	89.1457980388439	84.8591287070126	70.1543615436802
93.5028679443832	93.4731794062374	93.3452031439967	93.10431219606	92.7136390528662	92.0909540532681	91.0495657837367	89.1203052058717	84.8230282290201	70.0784867960105
93.4861691495272	93.4565223414499	93.3284443179242	93.0872605581951	92.6959898345542	92.072163171607	91.0285801649657	89.0948500464569	84.7869768476704	70.0026868016158
93.4694929214603	93.4398882563746	93.3117094154905	93.0702341969006	92.678367584632	92.0534013969675	91.0076267367838	89.069432463702	84.7509744361365	69.9269613597855
93.4528392509222	93.4232771370641	93.294998413904	93.0532330773785	92.660772254457	92.0346686661831	90.986705420897	89.0440523611078	84.7150208681481	69.8513102707256
93.4362081284451	93.4066889693876	93.2783112902397	93.0362571647749	92.643203795432	92.0159649162464	90.9658161392868	89.01870964257	84.6791160179876	69.7757333355528
93.4195995443557	93.3901237390328	93.2616480214405	93.019306424181	92.6256621590056	91.9972900843094	90.9449588142096	88.9934042123779	84.6432597604868	69.7002303562881
93.4030134887759	93.3735814315068	93.2450085843184	93.0023808206344	92.6081472966734	91.9786441076834	90.9241333681945	88.9681359752113	84.6074519710233	69.6248011358512
93.3864499516246	93.3570620321382	93.2283929555567	92.9854803191209	92.5906591599781	91.9600269238385	90.9033397240431	88.9429048361386	84.5716925255167	69.5494454780537
93.3699089226191	93.3405655260783	93.2118011117108	92.9686048845749	92.5731977005108	91.9414384704035	90.8825778048276	88.9177107006145	84.5359813004257	69.474163187594
93.3533903912762	93.3240918983027	93.1952330292102	92.9517544818815	92.555762869911	91.9228786851657	90.8618475338898	88.8925534744775	84.5003181727439	69.3989540700509
93.3368943469138	93.3076411336124	93.1786886843599	92.9349290758772	92.5383546198679	91.9043475060707	90.8411488348398	88.8674330639482	84.4647030199971	69.323817931878
93.3204207786526	93.291213216636	93.1621680533416	92.9181286313513	92.5209729021207	91.8858448712222	90.820481631555	88.8423493756263	84.4291357202393	69.2487545803976
93.3039696754169	93.2748081318303	93.1456711122153	92.9013531130472	92.5036176684592	91.8673707188818	90.7998458481786	88.8173023164892	84.3936161520497	69.1737638237954
93.2875410259364	93.2584258634824	93.129197836921	92.8846024856633	92.4862888707246	91.8489249874685	90.7792414091187	88.7922917938891	84.3581441945292	69.0988454711145
93.2711348187478	93.2420663957111	93.1127482032798	92.8678767138548	92.4689864608098	91.8305076155589	90.7586682390467	88.7673177155514	84.322719727297	69.02399933225
93.2547510421956	93.2257297124679	93.0963221869956	92.851175762234	92.4517103906605	91.8121185418866	90.7381262628965	88.7423799895722	84.2873426304876	68.9492252179431
93.238389684434	93.209415797539	93.0799197636562	92.8344995953723	92.4344606122751	91.793757705342	90.7176154058633	88.7174785244163	84.2520127847473	68.8745229397759
93.2220507334283	93.1931246345465	93.063540908735	92.8178481778007	92.4172370777059	91.7754250449722	90.6971355934019	88.692613228915	84.2167300712312	68.7998923101659
93.205734176956	93.1768562069498	93.0471855975924	92.8012214740114	92.4000397390593	91.7571204999806	90.6766867512264	88.667784012264	84.1814943715996	68.7253331423602
93.1894400026084	93.1606104980472	93.0308538054771	92.7846194484585	92.3828685484964	91.7388440097266	90.6562688053081	88.6429907840216	84.1463055680152	68.6508452504307
93.1731681977922	93.1443874909771	93.0145455075273	92.7680420655595	92.3657234582337	91.7205955137257	90.6358816818749	88.618233454106	84.1111635431399	68.5764284492681
93.1569187497305	93.1281871687197	92.9982606787724	92.751489289696	92.3486044205432	91.7023749516487	90.6155253074103	88.5935119327938	84.0760681801316	68.5020825545774
93.1406916454646	93.1120095140984	92.9819992941343	92.7349610852153	92.3315113877534	91.6841822633216	90.5951996086514	88.5688261307177	84.041019362641	68.4278073828717
93.1244868718551	93.0958545097808	92.9657613284286	92.7184574164308	92.3144443122495	91.6660173887254	90.5749045125887	88.5441759588646	84.0060169748086	68.353602751468
93.1083044155836	93.0797221382809	92.9495467563659	92.7019782476236	92.2974031464741	91.647880267996	90.5546399464645	88.5195613285735	83.971060901262	68.2794684784815
93.0921442631539	93.0636123819598	92.9333555525536	92.6855235430433	92.2803878429273	91.6297708414235	90.5344058377718	88.4949821515334	83.9361510271124	68.2054043828202
93.0760064008933	93.0475252230273	92.9171876914965	92.669093266909	92.2633983541676	91.6116890494521	90.5142021142529	88.4704383397816	83.9012872379516	68.1314102841808
93.0598908149543	93.0314606435436	92.9010431475987	92.6526873834106	92.2464346328123	91.5936348326798	90.494028703899	88.4459298057013	83.8664694198497	68.0574860030427
93.043797491316	93.0154186254203	92.8849218951649	92.6363058567093	92.2294966315374	91.5756081318581	90.4738855349482	88.4214564620203	83.8316974593513	67.9836313606636
93.0277264157852	92.9993991504221	92.868823908401	92.619948650939	92.2125843030788	91.5576088878918	90.4537725358851	88.3970182218081	83.7969712434731	67.9098461790744
93.0116775739979	92.983402200168	92.8527491614165	92.6036157302073	92.1956976002324	91.5396370418384	90.4336896354392	88.3726149984751	83.7622906597009	67.8361302810743
92.995650951421	92.9674277561328	92.8366976282247	92.5873070585962	92.1788364758542	91.5216925349081	90.4136367625841	88.3482467057697	83.7276555959867	67.762483490226
92.9796465333531	92.9514757996483	92.8206692827446	92.571022600163	92.1620008828613	91.5037753084633	90.3936138465362	88.323913257777	83.6930659407458	67.6889056308509
92.9636643049266	92.9355463119048	92.804664098802	92.5547623189419	92.145190774232	91.4858853040182	90.3736208167535	88.2996145689166	83.6585215828541	67.6153965280243
92.9477042511085	92.9196392739528	92.7886820501309	92.538526178944	92.1284061030059	91.4680224632388	90.353657602935	88.275350553941	83.6240224116454	67.5419560075707
92.9317663567022	92.9037546667035	92.7727231103743	92.522314144159	92.111646822285	91.4501867279423	90.3337241350191	88.2511211279335	83.5895683169081	67.468583896059
92.9158506063485	92.887892470931	92.756787253086	92.5061261785558	92.0949128852334	91.4323780400969	90.3138203431827	88.2269262063064	83.555159188883	67.3952800207983
92.8999569845274	92.8720526672733	92.7408744517313	92.4899622460832	92.0782042450779	91.4145963418213	90.29394615784	88.2027657047993	83.5207949182606	67.3220442098326
92.8840854755591	92.8562352362336	92.7249846796886	92.4738223106712	92.0615208551086	91.3968415753846	90.2741015096418	88.1786395394771	83.4864753961777	67.2488762919369
92.8682360636055	92.8404401581817	92.7091179102506	92.4577063362317	92.0448626686788	91.3791136832058	90.2542863294739	88.1545476267284	83.4522005142155	67.1757760966121
92.8524087326717	92.8246674133554	92.6932741166249	92.4416142866593	92.0282296392056	91.3614126078536	90.2345005484566	88.1304898832635	83.4179701643967	67.1027434540811
92.8366034666073	92.8089169818618	92.6774532719362	92.4255461258321	92.0116217201705	91.3437382920459	90.2147440979431	88.1064662261127	83.3837842391823	67.0297781952838
92.8208202491077	92.7931888436785	92.6616553492265	92.409501817613	91.995038865119	91.3260906786495	90.1950169095188	88.0824765726247	83.34964263147	66.9568801518731
92.8050590637153	92.777482978655	92.6458803214569	92.3934813258499	91.9784810276617	91.3084697106799	90.175318915	88.0585208404644	83.3155452345907	66.8840491562103
92.7893198938213	92.761799366514	92.6301281615084	92.3774846143771	91.961948161474	91.2908753313008	90.1556500464334	88.0345989476116	83.2814919423062	66.8112850413607
92.7736027226668	92.7461379868529	92.6143988421834	92.3615116470157	91.9454402202967	91.2733074838237	90.1360102360942	88.0107108123592	83.247482648807	66.7385876410896
92.7579075333438	92.7304988191445	92.5986923362065	92.3455623875748	91.9289571579366	91.2557661117077	90.1163994164857	87.9868563533113	83.2135172487093	66.6659567898576
92.7422343087973	92.7148818427393	92.5830086162258	92.3296367998518	91.9124989282659	91.2382511585593	90.0968175203381	87.9630354893815	83.1795956370524	66.593392322817
92.726583031826	92.6992870368655	92.5673476548139	92.3137348476337	91.8960654852236	91.2207625681314	90.0772644806076	87.9392481397914	83.1457177092968	66.5208940758067
92.710953685084	92.6837143806315	92.5517094244693	92.2978564946977	91.8796567828146	91.2033002843239	90.0577402304751	87.9154942240687	83.1118833613212	66.4484618853489
92.6953462510816	92.6681638530263	92.5360938976172	92.2820017048118	91.8632727751111	91.1858642511824	90.0382447033454	87.8917736620459	83.07809248942	66.3760955886446
92.6797607121876	92.6526354329213	92.5205010466108	92.2661704417358	91.846913416252	91.1684544128985	90.0187778328461	87.8680863738581	83.0443449903013	66.3037950235692
92.6641970506296	92.6371290990712	92.5049308437321	92.2503626692221	91.8305786604437	91.1510707138091	89.9993395528266	87.8444322799418	83.0106407610841	66.2315600286691
92.648655248496	92.6216448301155	92.4893832611934	92.2345783510161	91.81426846196	91.1337130983962	89.9799297973572	87.8208113010329	82.976979699296	66.159390443157
92.6331352877368	92.6061826045795	92.4738582711382	92.2188174508573	91.7979827751426	91.1163815112865	89.960548500728	87.7972233581654	82.9433617028708	66.0872861069084
92.6176371501654	92.5907424008759	92.458355845642	92.2030799324799	91.781721554401	91.099075897251	89.941195597448	87.7736683726698	82.9097866701463	66.0152468604574
92.6021608174595	92.5753241973056	92.4428759567137	92.1873657596135	91.7654847542132	91.0817962012047	89.921871022244	87.7501462661711	82.8762544998616	65.9432725449929
92.5867062711629	92.5599279720593	92.4274185762966	92.1716748959838	91.7492723291255	91.064542368206	89.9025747100597	87.7266569605877	82.842765091155	65.8713630023543
92.5712734926859	92.5445537032185	92.4119836762694	92.1560073053134	91.7330842337531	91.0473143434568	89.8833065960547	87.7032003781293	82.8093183435619	65.7995180750282
92.5558624633077	92.5292013687568	92.396571228447	92.1403629513224	91.7169204227798	91.0301120723017	89.8640666156035	87.6797764412959	82.7759141570118	65.7277376061442
92.5404731641768	92.513870946541	92.3811812045819	92.1247417977292	91.7007808509587	91.0129355002278	89.8448547042948	87.6563850728758	82.742552431827	65.6560214394711
92.5251055763127	92.4985624143325	92.3658135763649	92.1091438082511	91.6846654731122	90.9957845728643	89.8256707979301	87.6330261959443	82.7092330687193	65.5843694194132
92.509759680607	92.4832757497883	92.3504683154265	92.0935689466049	91.6685742441322	90.9786592359822	89.8065148325228	87.6096997338621	82.6759559687888	65.5127813910066
92.494435457825	92.4680109304622	92.3351453933374	92.0780171765077	91.6525071189803	90.9615594354938	89.7873867442979	87.5864056102737	82.6427210335207	65.4412571999153
92.4791328886063	92.4527679338062	92.3198447816099	92.0624884616777	91.6364640526879	90.9444851174524	89.76828646969	87.5631437491058	82.6095281647838	65.3697966924277
92.4638519534669	92.4375467371713	92.3045664516985	92.0469827658344	91.6204450003565	90.9274362280521	89.7492139453434	87.5399140745662	82.5763772648279	65.2983997154527
92.4485926327995	92.4223473178092	92.2893103750015	92.0315000526996	91.6044499171581	90.9104127136271	89.7301691081105	87.5167165111419	82.5432682362818	65.2270661165164
92.4333549068758	92.4071696528727	92.2740765228612	92.016040285998	91.5884787583347	90.8934145206514	89.7111518950509	87.4935509835977	82.5102009821512	65.1557957437581
92.4181387558468	92.3920137194176	92.2588648665654	92.0006034294578	91.572531479199	90.8764415957387	89.6921622434309	87.470417416975	82.4771754058163	65.084588445927
92.4029441597445	92.3768794944035	92.2436753773482	91.9851894468111	91.5566080351347	90.8594938856417	89.6732000907222	87.4473157365898	82.4441914110298	65.0134440723786
92.3877710984831	92.361766954695	92.2285080263909	91.969798301795	91.5407083815959	90.8425713372519	89.6542653746011	87.4242458680319	82.4112489019152	64.9423624730711
92.3726195518603	92.3466760770626	92.2133627848229	91.9544299581517	91.5248324741083	90.8256738975991	89.6353580329475	87.4012077371629	82.3783477829637	64.8713434985618
92.3574894995581	92.3316068381842	92.1982396237227	91.9390843796294	91.5089802682684	90.8088015138513	89.6164780038441	87.378201270115	82.3454879590334	64.800387000004
92.3423809211445	92.3165592146461	92.183138514119	91.9237615299827	91.4931517197441	90.791954133314	89.5976252255756	87.3552263932897	82.312669335346	64.7294928291431
92.3272937960745	92.301533182944	92.1680594269913	91.9084613729736	91.4773467842749	90.7751317034297	89.5787996366277	87.332283033356	82.2798918174856	64.6586608383135
92.3122281036912	92.2865287194842	92.1530023332709	91.8931838723713	91.4615654176716	90.7583341717783	89.5600011756859	87.3093711172496	82.2471553113965	64.5878908804351
92.2971838232271	92.2715458005846	92.1379672038419	91.8779289919537	91.4458075758172	90.7415614860757	89.5412297816351	87.2864905721709	82.2144597233807	64.5171828090098
92.2821609338055	92.2565844024761	92.1229540095421	91.8626966955072	91.4300732146661	90.7248135941743	89.5224853935584	87.2636413255838	82.1818049600967	64.4465364781186
92.267159414441	92.241644501303	92.1079627211637	91.8474869468278	91.4143622902449	90.7080904440618	89.5037679507366	87.2408233052146	82.1491909285567	64.3759517424175
92.2521792440417	92.226726073125	92.0929933094544	91.8322997097213	91.3986747586523	90.6913919838617	89.4850773926467	87.2180364390503	82.1166175361251	64.3054284571352
92.2372204014093	92.2118290939176	92.0780457451182	91.8171349480038	91.383010576059	90.6747181618323	89.4664136589616	87.1952806553373	82.0840846905166	64.2349664780689
92.2222828652412	92.1969535395734	92.063119998816	91.8019926255028	91.3673696987084	90.6580689263664	89.4477766895488	87.1725558825803	82.0515922997939	64.1645656615816
92.2073666141308	92.1820993859031	92.048216041167	91.7868727060571	91.3517520829158	90.6414442259911	89.4291664244701	87.1498620495406	82.019140272366	64.0942258645989
92.1924716265695	92.1672666086367	92.033333842749	91.7717751535174	91.3361576850695	90.6248440093674	89.4105828039801	87.127199085235	81.9867285169862	64.0239469446055
92.177597880947	92.1524551834242	92.0184733740997	91.7566999317474	91.3205864616301	90.6082682252897	89.3920257685258	87.1045669189343	81.9543569427503	63.9537287596422
92.1627453555532	92.1376650858373	92.0036346057171	91.7416470046236	91.3050383691309	90.5917168226856	89.3734952587455	87.0819654801624	81.9220254590946	63.8835711683028
92.1479140285788	92.1228962913694	91.9888175080607	91.7266163360361	91.2895133641782	90.5751897506152	89.354991215468	87.0593946986944	81.889733975794	63.8134740297308
92.1331038781167	92.1081487754379	91.9740220515523	91.7116078898893	91.2740114034511	90.5586869582711	89.336513579712	87.0368545045557	81.8574824029603	63.7434372036165
92.118314882163	92.0934225133839	91.9592482065763	91.6966216301021	91.2585324437016	90.5422083949778	89.318062292685	87.0143448280206	81.8252706510401	63.6734605501939
92.1035470186181	92.0787174804745	91.9444959434813	91.6816575206085	91.2430764417547	90.5257540101915	89.2996372957825	86.9918655996112	81.7930986308133	63.6035439302375
92.088800265288	92.0640336519026	91.9297652325801	91.666715525358	91.2276433545086	90.5093237534993	89.2812385305872	86.9694167500956	81.760966253391	63.5336872050594
92.0740745998851	92.049371002789	91.9150560441514	91.6517956083163	91.2122331389347	90.4929175746195	89.2628659388683	86.9469982104874	81.7288734302136	63.4638902365061
92.0593700000295	92.0347295081824	91.9003683484396	91.6368977334657	91.1968457520776	90.4765354234005	89.2445194625805	86.9246099120439	81.6968200730494	63.3941528869558
92.0446864432502	92.0201091430611	91.8857021156563	91.6220218648051	91.1814811510553	90.4601772498211	89.2261990438633	86.9022517862648	81.6648060939925	63.3244750193154
92.0300239069858	92.0055098823338	91.8710573159808	91.6071679663514	91.1661392930591	90.4438430039895	89.2079046250402	86.8799237648915	81.6328314054611	63.2548564970171
92.015382368586	91.9909317008404	91.856433919561	91.592336002139	91.1508201353538	90.4275326361434	89.1896361486178	86.8576257799053	81.6008959201957	63.1852971840161
92.0007618053123	91.9763745733529	91.8418318965139	91.5775259362209	91.1355236352777	90.4112460966494	89.171393557285	86.8353577635266	81.5689995512576	63.1157969447874
91.9861621943392	91.961838474577	91.8272512169266	91.5627377326688	91.1202497502425	90.3949833360026	89.1531767939123	86.8131196482133	81.5371422120268	63.0463556443227
91.9715835127557	91.9473233791521	91.812691850857	91.5479713555738	91.1049984377338	90.3787443048265	89.134985801551	86.7909113666599	81.5053238162004	62.9769731481281
91.9570257375655	91.9328292616531	91.7981537683346	91.5332267690464	91.0897696553105	90.3625289538722	89.1168205234324	86.7687328517963	81.473544277791	62.9076493222207
91.9424888456887	91.9183560965908	91.7836369393608	91.5185039372177	91.0745633606056	90.3463372340183	89.0986809029669	86.7465840367863	81.4418035111252	62.8383840331261
91.9279728139625	91.9039038584131	91.7691413339105	91.5038028242388	91.0593795113255	90.3301690962705	89.0805668837433	86.7244648550268	81.4101014308412	62.7691771478757
91.9134776191426	91.8894725215057	91.754666921932	91.4891233942821	91.0442180652505	90.3140244917613	89.0624784095282	86.7023752401464	81.3784379518878	62.7000285340034
91.8990032379038	91.8750620601935	91.740213673348	91.4744656115413	91.0290789802348	90.2979033717493	89.0444154242649	86.6803151260043	81.3468129895225	62.6309380595433
91.8845496468414	91.8606724487408	91.7257815580564	91.4598294402319	91.0139622142063	90.2818056876194	89.0263778720729	86.6582844466891	81.3152264593099	62.5619055930272
91.8701168224716	91.8463036613528	91.711370545931	91.4452148445916	90.9988677251668	90.2657313908816	89.0083656972469	86.6362831365177	81.28367827712	62.4929310034809
91.8557047412336	91.8319556721764	91.6969806068222	91.4306217888806	90.9837954711921	90.2496804331717	88.9903788442563	86.6143111300341	81.2521683591266	62.4240141604227
91.8413133794894	91.8176284553007	91.6826117105575	91.4160502373823	90.9687454104319	90.2336527662498	88.9724172577442	86.5923683620084	81.2206966218055	62.3551549338598
91.8269427135255	91.8033219847585	91.6682638269423	91.4015001544031	90.9537175011097	90.2176483420009	88.954480882527	86.5704547674355	81.1892629819333	62.2863531942862
91.8125927195538	91.7890362345266	91.6539369257607	91.3869715042736	90.9387117015233	90.2016671124339	88.936569663593	86.548570281534	81.1578673565855	62.2176088126796
91.7982633737126	91.7747711785273	91.6396309767761	91.3724642513483	90.9237279700443	90.1857090296815	88.9186835461026	86.5267148397452	81.1265096631349	62.1489216604993
91.7839546520671	91.7605267906286	91.6253459497319	91.3579783600063	90.9087662651182	90.1697740459997	88.9008224753866	86.504888377732	81.0951898192503	62.080291609683
91.7696665306111	91.7463030446455	91.6110818143519	91.3435137946513	90.8938265452647	90.1538621137675	88.8829863969461	86.4830908313776	81.0639077428945	62.0117185326449
91.7553989852676	91.7320999143408	91.5968385403414	91.3290705197128	90.8789087690775	90.1379731854868	88.8651752564516	86.4613221367845	81.0326633523232	61.9432023022724
91.7411519918897	91.7179173734258	91.5826160973875	91.3146484996455	90.8640128952243	90.1221072137815	88.847388999742	86.4395822302737	81.0014565660832	61.8747427919242
91.7269255262615	91.7037553955615	91.56841445516	91.3002476989302	90.849138882447	90.1062641513974	88.8296275728244	86.417871048383	80.970287303011	61.8063398754273
91.7127195640995	91.6896139543588	91.5542335833117	91.285868082074	90.8342866895613	90.0904439512021	88.811890921873	86.3961885278666	80.939155482231	61.7379934270746
91.698534081053	91.67549302338	91.5400734514795	91.2715096136108	90.8194562754572	90.0746465661842	88.7941789932284	86.3745346056936	80.9080610231544	61.6697033216227
91.6843690527052	91.6613925761395	91.5259340292847	91.2571722581013	90.8046475990987	90.0588719494531	88.776491733397	86.3529092190471	80.8770038454776	61.601469434289
91.6702244545744	91.6473125861041	91.5118152863336	91.2428559801338	90.7898606195237	90.0431200542388	88.7588290890502	86.3313123053232	80.8459838691802	61.5332916407495
91.6561002621146	91.6332530266944	91.4977171922183	91.2285607443242	90.7750952958445	90.0273908338913	88.7411910070239	86.3097438021296	80.8150010145243	61.4651698171361
91.6419964507164	91.6192138712855	91.4836397165173	91.2142865153163	90.7603515872471	90.0116842418804	88.7235774343176	86.2882036472852	80.7840552020526	61.3971038400346
91.6279129957083	91.6051950932075	91.469582828796	91.2000332577826	90.7456294529917	89.9960002317952	88.7059883180937	86.2666917788185	80.7531463525868	61.329093586482
91.613849872357	91.5911966657468	91.4555464986074	91.1858009364239	90.7309288524126	89.9803387573439	88.6884236056768	86.2452081349667	80.7222743872267	61.2611389339638
91.5998070558689	91.5772185621464	91.4415306954924	91.1715895159702	90.7162497449181	89.9646997723533	88.6708832445533	86.223752654175	80.6914392273481	61.1932397604124
91.5857845213906	91.5632607556069	91.4275353889811	91.1573989611808	90.7015920899903	89.9490832307687	88.65336718237	86.2023252750952	80.6606407946019	61.1253959442041
91.5717822440099	91.5493232192874	91.4135605485924	91.1432292368447	90.6869558471856	89.933489086653	88.6358753669346	86.1809259365848	80.6298790109124	61.0576073641568
91.5578001987568	91.5354059263061	91.3996061438356	91.1290803077808	90.6723409761342	89.9179172941871	88.6184077462136	86.1595545777062	80.5991537984758	60.989873899528
91.5438383606041	91.521508849741	91.3856721442101	91.1149521388381	90.6577474365403	89.9023678076689	88.6009642683328	86.1382111377253	80.5684650797592	60.9221954300124
91.5298967044686	91.507631962631	91.3717585192066	91.1008446948963	90.6431751881822	89.8868405815132	88.583544881576	86.1168955561111	80.5378127774989	60.8545718357393
91.5159752052116	91.4937752379765	91.3578652383073	91.0867579408659	90.6286241909117	89.8713355702514	88.5661495343846	86.0956077725341	80.507196814699	60.7870029972705
91.5020738376402	91.4799386487397	91.3439922709866	91.0726918416885	90.614094404655	89.8558527285311	88.5487781753567	86.0743477268657	80.4766171146301	60.7194887955982
91.4881925765075	91.4661221678462	91.3301395867117	91.0586463623373	90.5995857894119	89.8403920111157	88.5314307532466	86.0531153591772	80.4460736008281	60.6520291121426
91.4743313965143	91.4523257681851	91.316307154943	91.0446214678169	90.585098305256	89.8249533728841	88.5141072169642	86.0319106097386	80.4155661970925	60.5846238287496
91.4604902723092	91.4385494226099	91.3024949451348	91.0306171231641	90.5706319123349	89.8095367688304	88.4968075155742	86.010733419018	80.3850948274854	60.5172728276886
91.4466691784897	91.4247931039393	91.2887029267358	91.016633293448	90.5561865708699	89.7941421540633	88.4795315982954	85.9895837276804	80.3546594163299	60.4499759916504
91.4328680896032	91.4110567849579	91.2749310691896	91.00266994377	90.5417622411559	89.7787694838062	88.4622794145004	85.9684614765868	80.324259888209	60.382733203745
91.4190869801474	91.3973404384168	91.261179341935	90.9887270392647	90.5273588835618	89.7634187133964	88.4450509137145	85.9473666067933	80.293896167964	60.3155443474993
91.4053258245717	91.3836440370347	91.2474477144073	90.9748045450994	90.5129764585301	89.7480897982851	88.4278460456153	85.9262990595502	80.2635681806934	60.248409306855
91.3915845972774	91.3699675534979	91.2337361560378	90.9609024264749	90.4986149265768	89.7327826940366	88.4106647600322	85.9052587763009	80.2332758517516	60.1813279661665
91.3778632726188	91.3563109604618	91.2200446362549	90.9470206486258	90.4842742482917	89.7174973563288	88.3935070069454	85.8842456986812	80.2030191067476	60.1143002101986
91.3641618249042	91.3426742305511	91.2063731244848	90.9331591768201	90.4699543843381	89.7022337409518	88.3763727364856	85.8632597685183	80.1727978715436	60.0473259241247
91.3504802283963	91.3290573363605	91.1927215901514	90.9193179763603	90.4556552954527	89.6869918038084	88.3592618989331	85.8423009278298	80.1426120722537	59.9804049935245
91.3368184573131	91.3154602504556	91.1790900026772	90.9054970125833	90.441376942446	89.6717715009133	88.3421744447175	85.8213691188229	80.112461635243	59.9135373043817
91.3231764858289	91.3018829453736	91.165478331484	90.8916962508602	90.4271192862017	89.656572788393	88.3251103244167	85.8004642838935	80.0823464871256	59.8467227430823
91.3095542880748	91.2883253936236	91.1518865459928	90.8779156565975	90.412882287677	89.6413956224851	88.3080694887567	85.7795863656253	80.0522665547644	59.7799611964124
91.2959518381396	91.2747875676877	91.1383146156246	90.8641551952363	90.3986659079024	89.6262399595386	88.2910518886105	85.7587353067888	80.0222217652689	59.713252551556
91.2823691100706	91.2612694400216	91.1247625098012	90.8504148322533	90.3844701079818	89.6111057560129	88.274057474998	85.7379110503405	79.9922120459942	59.6465966960931
91.2688060778741	91.2477709830548	91.1112301979451	90.8366945331608	90.3702948490923	89.595992968478	88.257086199085	85.7171135394221	79.9622373245404	59.5799935179979
91.2552627155167	91.234292169192	91.0977176494803	90.8229942635069	90.3561400924843	89.5809015536135	88.2401380121827	85.6963427173597	79.9322975287505	59.5134429056362
91.2417389969252	91.2208329708132	91.0842248338328	90.8093139888755	90.3420057994812	89.5658314682092	88.2232128657473	85.6755985276625	79.9023925867096	59.446944747764
91.2282348959884	91.2073933602743	91.0707517204309	90.795653674887	90.3278919314797	89.5507826691639	88.2063107113792	85.6548809140224	79.8725224267438	59.3804989335253
91.2147503865568	91.1939733099083	91.0572982787058	90.7820132871981	90.3137984499494	89.5357551134855	88.1894315008222	85.634189820313	79.8426869774189	59.31410535245
91.2012854424442	91.1805727920254	91.043864478092	90.7683927915025	90.2997253164331	89.5207487582906	88.1725751859635	85.6135251905886	79.812886167539	59.247763894452
91.1878400374277	91.1671917789136	91.0304502880278	90.7547921535304	90.2856724925464	89.5057635608042	88.1557417188325	85.5928869690836	79.7831199261458	59.1814744498275
91.1744141452488	91.15383024284	91.0170556779555	90.7412113390494	90.2716399399777	89.4907994783593	88.1389310516007	85.5722751002115	79.7533881825169	59.1152369092528
91.1610077396143	91.1404881560505	91.0036806173224	90.7276503138644	90.2576276204885	89.4758564683965	88.1221431365806	85.5516895285641	79.723690866165	59.0490511637824
91.1476207941965	91.1271654907711	90.9903250755805	90.7141090438177	90.2436354959129	89.4609344884638	88.1053779262257	85.5311301989107	79.6940279068364	58.9829171048473
91.1342532826342	91.1138622192082	90.9769890221877	90.7005874947895	90.2296635281578	89.4460334962165	88.0886353731294	85.5105970561972	79.6643992345104	58.9168346242528
91.1209051785336	91.1005783135492	90.9636724266076	90.6870856326979	90.2157116792028	89.4311534494162	88.0719154300249	85.4900900455454	79.6348047793975	58.8508036141768
91.1075764554686	91.0873137459634	90.9503752583103	90.6736034234992	90.2017799110998	89.4162943059313	88.0552180497841	85.469609112252	79.6052444719389	58.7848239671682
91.0942670869814	91.0740684886021	90.9370974867727	90.660140833188	90.1878681859736	89.4014560237359	88.0385431854177	85.4491542017881	79.5757182428047	58.7188955761444
91.080977046584	91.0608425135995	90.9238390814789	90.6466978277973	90.1739764660213	89.3866385609102	88.0218907900739	85.4287252597981	79.5462260228935	58.6530183343901
91.0677063077577	91.0476357930734	90.9106000119207	90.633274373399	90.1601047135124	89.3718418756396	88.0052608170383	85.4083222320989	79.5167677433307	58.5871921355549
91.0544548439548	91.0344482991254	90.8973802475979	90.6198704361039	90.1462528907889	89.3570659262147	87.9886532197333	85.3879450646792	79.4873433354677	58.521416873652
91.0412226285986	91.0212800038419	90.8841797580188	90.6064859820619	90.1324209602648	89.3423106710308	87.9720679517176	85.3675937036991	79.4579527308805	58.4556924430561
91.0280096350844	91.0081308792943	90.8709985127007	90.593120977462	90.1186088844265	89.3275760685879	87.9555049666852	85.3472680954884	79.4285958613693	58.3900187385016
91.0148158367802	90.9950008975398	90.8578364811699	90.5797753885331	90.1048166258325	89.3128620774898	87.9389642184654	85.3269681865467	79.3992726589564	58.324395655081
91.0016412070269	90.9818900306219	90.8446936329625	90.5664491815431	90.0910441471134	89.2981686564445	87.9224456610219	85.306693923542	79.369983055886	58.2588230882428
90.9884857191394	90.9687982505708	90.8315699376248	90.5531423228004	90.0772914109716	89.2834957642633	87.9059492484527	85.2864452533106	79.3407269846227	58.1933009337902
90.9753493464072	90.9557255294043	90.8184653647134	90.5398547786528	90.0635583801818	89.2688433598607	87.8894749349888	85.2662221228556	79.3115043778504	58.127829087879
90.9622320620948	90.9426718391279	90.8053798837957	90.5265865154887	90.0498450175902	89.2542114022543	87.8730226749945	85.2460244793465	79.2823151684717	58.0624074470158
90.9491338394425	90.9296371517358	90.7923134644504	90.5133374997365	90.036151286115	89.2395998505641	87.8565924229661	85.2258522701185	79.2531592896061	57.9970359080565
90.936054651667	90.9166214392111	90.7792660762678	90.5001076978653	90.0224771487459	89.2250086640125	87.840184133532	85.2057054426716	79.2240366745895	57.9317143682047
90.9229944719619	90.9036246735265	90.7662376888501	90.4868970763848	90.0088225685446	89.2104378019237	87.8237977614518	85.1855839446701	79.1949472569732	57.8664427250095
90.9099532734985	90.8906468266447	90.7532282718118	90.4737056018455	89.995187508644	89.1958872237238	87.807433261616	85.1654877239414	79.1658909705226	57.8012208763644
90.8969310294264	90.877687870519	90.7402377947803	90.4605332408387	89.9815719322486	89.1813568889399	87.7910905890451	85.1454167284756	79.136867749216	57.7360487205051
90.883927712874	90.864747777094	90.7272662273959	90.4473799599972	89.9679758026343	89.1668467572006	87.7747696988896	85.1253709064247	79.1078775272444	57.6709261560081
90.8709432969491	90.8518265183056	90.7143135393124	90.4342457259947	89.9543990831485	89.1523567882348	87.7584705464291	85.1053502061021	79.0789202390093	57.605853081789
90.8579777547394	90.8389240660822	90.7013797001972	90.4211305055466	89.9408417372096	89.137886941872	87.7421930870718	85.0853545759811	79.0499958191228	57.5408293971009
90.8450310593135	90.8260403923446	90.688464679732	90.4080342654097	89.9273037283073	89.1234371780419	87.7259372763541	85.0653839646953	79.021104202406	57.4758550015327
90.8321031837211	90.8131754690068	90.675568447613	90.3949569723826	89.9137850200025	89.1090074567741	87.7097030699403	85.0454383210369	78.992245323888	57.4109297950071
90.8191941009936	90.8003292679765	90.6626909735512	90.3818985933058	89.9002855759268	89.0945977381974	87.6934904236216	85.0255175939564	78.9634191188052	57.3460536777799
90.8063037841448	90.7875017611555	90.6498322272725	90.3688590950618	89.8868053597831	89.08020798254	87.677299293316	85.0056217325621	78.9346255226	57.2812265504375
90.7934322061716	90.7746929204403	90.6369921785188	90.3558384445751	89.8733443353448	89.0658381501292	87.6611296350676	84.985750686119	78.9058644709203	57.2164483138957
90.7805793400542	90.7619027177224	90.6241707970474	90.3428366088125	89.8599024664565	89.0514882013906	87.644981405046	84.9659044040482	78.8771358996179	57.1517188693979
90.767745158757	90.749131124889	90.611368052632	90.3298535547836	89.8464797170331	89.0371580968483	87.6288545595462	84.9460828359263	78.8484397447479	57.0870381185138
90.7549296352289	90.7363781138232	90.5985839150627	90.31688924954	89.8330760510603	89.0228477971245	87.6127490549878	84.9262859314849	78.8197759425678	57.0224059631378
90.7421327424042	90.7236436564048	90.5858183541464	90.3039436601764	89.8196914325942	89.0085572629389	87.5966648479144	84.9065136406093	78.7911444295364	56.957822305487
90.7293544532028	90.7109277245106	90.5730713397072	90.2910167538301	89.8063258257616	88.9942864551089	87.5806018949934	84.8867659133384	78.762545142313	56.8932870481002
90.7165947405308	90.6982302900147	90.5603428415867	90.2781084976815	89.7929791947592	88.9800353345488	87.5645601530153	84.8670426998638	78.7339780177561	56.8288000938362
90.7038535772812	90.6855513247894	90.5476328296441	90.2652188589537	89.7796515038544	88.96580386227	87.5485395788935	84.8473439505292	78.705442992923	56.764361345872
90.6911309363345	90.6728908007052	90.5349412737569	90.2523478049135	89.7663427173846	88.9515919993802	87.5325401296633	84.8276696158295	78.6769400050683	56.6999707077015
90.6784267905587	90.6602486896315	90.5222681438207	90.2394953028706	89.7530527997573	88.9373997070836	87.516561762482	84.8080196464104	78.6484689916436	56.6356280831342
90.6657411128107	90.6476249634368	90.5096134097502	90.2266613201783	89.73978171545	88.9232269466802	87.5006044346281	84.7883939930676	78.6200298902961	56.5713333762931
90.6530738759359	90.6350195939896	90.4969770414786	90.2138458242335	89.7265294290101	88.9090736795657	87.4846681035007	84.7687926067462	78.5916226388677	56.5070864916139
90.6404250527694	90.6224325531584	90.4843590089589	90.2010487824765	89.7132959050549	88.8949398672314	87.4687527266194	84.7492154385399	78.5632471753945	56.4428873338431
90.6277946161362	90.6098638128123	90.4717592821633	90.1882701623916	89.7000811082713	88.8808254712635	87.4528582616236	84.7296624396906	78.5349034381054	56.3787358080364
90.6151825388518	90.5973133448216	90.4591778310842	90.1755099315069	89.686885003416	88.8667304533432	87.436984666272	84.7101335615875	78.5065913654215	56.3146318195577
90.6025887937226	90.5847811210578	90.4466146257338	90.1627680573945	89.6737075553153	88.8526547752459	87.4211318984423	84.6906287557665	78.4783108959554	56.2505752740774
90.5900133535465	90.5722671133945	90.434069636145	90.1500445076706	89.6605487288648	88.8385983988417	87.4052999161305	84.6711479739099	78.4500619685097	56.1865660775706
90.5774561911134	90.5597712937075	90.4215428323715	90.1373392499955	89.6474084890295	88.8245612860945	87.3894886774507	84.6516911678452	78.4218445220766	56.1226041363165
90.5649172792058	90.5472936338753	90.4090341844879	90.124652252074	89.6342868008439	88.8105433990618	87.3736981406344	84.6322582895448	78.3936584958371	56.0586893568961
90.5523965905989	90.5348341057796	90.39654366259	90.1119834816551	89.6211836294114	88.7965446998946	87.3579282640304	84.6128492911252	78.3655038291597	55.9948216461913
90.5398940980615	90.5223926813055	90.3840712367953	90.0993329065324	89.6080989399047	88.7825651508369	87.3421790061037	84.5934641248469	78.3373804615998	55.9310009113833
90.5274097743563	90.5099693323423	90.3716168772433	90.086700494544	89.5950326975654	88.7686047142259	87.3264503254358	84.5741027431128	78.3092883328991	55.8672270599512
90.5149435922403	90.4975640307834	90.3591805540953	90.0740862135729	89.5819848677042	88.754663352491	87.3107421807238	84.5547650984686	78.2812273829841	55.8034999996708
90.5024955244655	90.485176748527	90.3467622375351	90.0614900315467	89.5689554157004	88.7407410281541	87.2950545307801	84.5354511436014	78.2531975519658	55.7398196386129
90.4900655437792	90.4728074574764	90.3343618977691	90.048911916438	89.5559443070022	88.7268377038291	87.2793873345318	84.5161608313395	78.2251987801388	55.6761858851422
90.4776536229243	90.4604561295407	90.3219795050268	90.0363518362642	89.5429515071263	88.7129533422215	87.2637405510205	84.4968941146518	78.19723100798	55.6125986479156
90.4652597346403	90.4481227366345	90.3096150295606	90.0238097590879	89.5299769816581	88.6990879061285	87.2481141394016	84.477650946647	78.1692941761485	55.5490578358814
90.4528838516632	90.4358072506789	90.2972684416465	90.011285653017	89.5170206962513	88.6852413584383	87.232508058944	84.4584312805731	78.1413882254842	55.4855633582772
90.440525946726	90.4235096436019	90.2849397115839	89.9987794862042	89.5040826166279	88.6714136621302	87.2169222690298	84.4392350698168	78.113513097007	55.4221151246292
90.4281859925598	90.411229887338	90.2726288096964	89.9862912268478	89.4911627085784	88.6576047802741	87.2013567291536	84.4200622679028	78.0856687319165	55.3587130447507
90.4158639618932	90.3989679538296	90.2603357063316	89.9738208431917	89.4782609379613	88.6438146760301	87.1858113989222	84.4009128284935	78.0578550715906	55.2953570287404
90.4035598274536	90.3867238150266	90.2480603718616	89.9613683035248	89.4653772707031	88.6300433126487	87.1702862380543	84.3817867053879	78.0300720575848	55.2320469869816
90.3912735619672	90.3744974428874	90.2358027766829	89.9489335761819	89.4525116727984	88.6162906534701	87.1547812063797	84.3626838525217	78.0023196316319	55.1687828301406
90.3790051381598	90.3622888093785	90.2235628912172	89.9365166295433	89.4396641103096	88.6025566619241	87.1392962638392	84.3436042239659	77.9745977356405	55.1055644691655
90.3667545287566	90.3500978864755	90.211340685911	89.9241174320352	89.4268345493669	88.5888413015298	87.1238313704842	84.3245477739272	77.9469063116946	55.0423918152847
90.3545217064833	90.3379246461632	90.1991361312364	89.9117359521293	89.4140229561681	88.5751445358954	87.108386486476	84.3055144567463	77.9192453020528	54.9792647800061
90.3423066440661	90.325769060436	90.1869491976909	89.8993721583433	89.4012292969786	88.5614663287178	87.0929615720857	84.2865042268984	77.8916146491474	54.916183275115
90.3301093142324	90.3136311012982	90.1747798557979	89.8870260192408	89.3884535381314	88.5478066437825	87.0775565876935	84.2675170389918	77.8640142955838	54.8531472126739
90.3179296897108	90.3015107407644	90.1626280761068	89.8746975034315	89.3756956460267	88.5341654449631	87.0621714937884	84.248552847768	77.8364441841393	54.7901565050201
90.3057677432318	90.2894079508597	90.1504938291931	89.8623865795711	89.362955587132	88.5205426962215	87.046806250968	84.2296116081004	77.8089042577631	54.7272110647656
90.2936234475286	90.2773227036204	90.138377085659	89.8500932163614	89.3502333279821	88.506938361607	87.0314608199376	84.2106932749944	77.7813944595746	54.6643108047946
90.2814967753364	90.2652549710939	90.1262778161333	89.8378173825503	89.3375288351787	88.4933524052566	87.0161351615104	84.1917978035868	77.7539147328634	54.6014556382635
90.2693876993941	90.2532047253391	90.1141959912716	89.8255590469323	89.3248420753907	88.4797847913945	87.0008292366066	84.1729251491445	77.7264650210882	54.5386454785988
90.2572961924436	90.2411719384273	90.1021315817568	89.8133181783478	89.3121730153536	88.4662354843316	86.9855430062531	84.154075267065	77.6990452678759	54.4758802394961
90.245222227231	90.2291565824415	90.0900845582988	89.801094745684	89.29952162187	88.4527044484658	86.9702764315833	84.1352481128751	77.6716554170213	54.413159834919
90.2331657765063	90.2171586294778	90.0780548916354	89.7888887178741	89.2868878618088	88.4391916482813	86.9550294738366	84.1164436422307	77.6442954124861	54.350484179098
90.2211268130244	90.2051780516449	90.0660425525319	89.7767000638983	89.2742717021058	88.4256970483486	86.9398020943578	84.097661810916	77.6169651983978	54.2878531865289
90.2091053095452	90.1932148210648	90.0540475117816	89.7645287527829	89.2616731097631	88.4122206133239	86.9245942545972	84.0789025748433	77.5896647190499	54.2252667719718
90.1971012388337	90.1812689098732	90.0420697402058	89.752374753601	89.2490920518491	88.3987623079493	86.9094059161094	84.0601658900521	77.5623939189002	54.1627248504502
90.1851145736611	90.1693402902194	90.0301092086544	89.7402380354725	89.2365284954988	88.3853220970523	86.8942370405539	84.041451712709	77.5351527425705	54.1002273372492
90.1731452868043	90.1574289342671	90.0181658880057	89.7281185675639	89.2239824079129	88.3718999455455	86.8790875896938	84.0227599991067	77.507941134846	54.037774147915
90.161193351047	90.1455348141942	90.0062397491665	89.7160163190885	89.2114537563585	88.3584958184263	86.8639575253961	84.0040907056638	77.4807590406744	53.9753651982532
90.1492587391795	90.1336579021938	89.9943307630729	89.7039312593062	89.1989425081685	88.3451096807771	86.8488468096309	83.9854437889241	77.4536064051653	53.913000404328
90.1373414239996	90.1217981704735	89.9824389006899	89.6918633575241	89.1864486307419	88.3317414977644	86.8337554044711	83.9668192055562	77.4264831735891	53.8506796824608
90.1254413783124	90.1099555912568	89.9705641330116	89.6798125830961	89.173972091543	88.3183912346391	86.8186832720921	83.948216912353	77.399389291377	53.788402949229
90.1135585749312	90.0981301367825	89.9587064310619	89.6677789054229	89.1615128581022	88.3050588567359	86.8036303747714	83.929636866231	77.3723247041197	53.7261701214654
90.1016929866772	90.0863217793053	89.9468657658943	89.6557622939525	89.1490708980151	88.2917443294732	86.7885966748883	83.91107902423	77.3452893575669	53.6639811162563
90.0898445863806	90.0745304910965	89.9350421085918	89.6437627181797	89.1366461789431	88.278447618353	86.7735821349231	83.8925433435124	77.3182831976267	53.6018358509409
90.0780133468804	90.0627562444436	89.9232354302678	89.6317801476465	89.1242386686126	88.2651686889601	86.7585867174575	83.8740297813629	77.2913061703648	53.53973424311
90.0661992410247	90.0509990116509	89.9114457020657	89.6198145519421	89.1118483348154	88.2519075069626	86.7436103851734	83.8555382951879	77.2643582220038	53.477676210605
90.0544022416717	90.0392587650399	89.8996728951593	89.6078659007027	89.0994751454085	88.2386640381112	86.7286531008532	83.8370688425148	77.2374392989228	53.4156616715166
90.0426223216892	90.0275354769493	89.8879169807528	89.5959341636118	89.0871190683137	88.2254382482391	86.7137148273787	83.8186213809918	77.2105493476561	53.3536905441837
90.0308594539555	90.0158291197356	89.8761779300813	89.5840193104003	89.0747800715179	88.2122301032616	86.6987955277317	83.8001958683875	77.1836883148931	53.2917627471928
90.0191136113593	90.0041396657729	89.8644557144107	89.572121310846	89.0624581230729	88.1990395691761	86.6838951649928	83.7817922625899	77.1568561474777	53.2298781993761
90.0073847668004	89.9924670874538	89.8527503050377	89.5602401347744	89.0501531910949	88.1858666120616	86.6690137023414	83.7634105216063	77.1300527924069	53.1680368198111
89.99567289319	89.980811357189	89.8410616732906	89.5483757520581	89.0378652437649	88.1727111980787	86.6541511030552	83.7450506035628	77.1032781968311	53.1062385278191
89.9839779634507	89.9691724474081	89.8293897905286	89.5365281326173	89.0255942493285	88.1595732934693	86.63930733051	83.7267124667037	77.0765323080525	53.0444832429645
89.9722999505171	89.9575503305594	89.8177346281429	89.5246972464195	89.0133401760955	88.1464528645563	86.6244823481793	83.7083960693911	77.0498150735253	52.9827708850534
89.9606388273359	89.9459449791106	89.8060961575558	89.5128830634796	89.0011029924401	88.1333498777433	86.6096761196339	83.6901013701042	77.0231264408545	52.9211013741327
89.9489945668664	89.9343563655487	89.7944743502219	89.5010855538601	88.9888826668006	88.1202642995145	86.5948886085413	83.6718283274393	76.9964663577953	52.859474630489
89.9373671420809	89.9227844623805	89.7828691776276	89.4893046876708	88.9766791676796	88.1071960964344	86.5801197786659	83.6535769001088	76.9698347722528	52.7978905746478
89.9257565259645	89.9112292421326	89.7712806112913	89.4775404350692	88.9644924636433	88.0941452351478	86.5653695938683	83.635347046941	76.943231632281	52.7363491273721
89.9141626915159	89.899690677352	89.7597086227638	89.4657927662604	88.9523225233222	88.0811116823789	86.5506380181047	83.6171387268798	76.9166568860823	52.6748502096614
89.9025856117477	89.8881687406058	89.7481531836283	89.4540616514969	88.9401693154101	88.0680954049321	86.5359250154273	83.5989518989836	76.8901104820068	52.6133937427511
89.8910252596862	89.876663404482	89.7366142655005	89.4423470610789	88.9280328086648	88.0550963696906	86.5212305499831	83.5807865224257	76.863592368552	52.5519796481109
89.8794816083723	89.8651746415895	89.7250918400289	89.4306489653543	88.9159129719076	88.0421145436172	86.5065545860141	83.5626425564931	76.8371024943616	52.4906078474443
89.8679546308613	89.8537024245582	89.7135858788949	89.4189673347185	88.9038097740231	88.0291498937534	86.4918970878569	83.5445199605866	76.8106408082253	52.4292782626873
89.8564443002234	89.8422467260395	89.7020963538125	89.4073021396146	88.8917231839594	88.0162023872194	86.4772580199421	83.5264186942198	76.7842072590783	52.3679908160073
89.844950589544	89.8308075187063	89.6906232365294	89.3956533505336	88.8796531707276	88.0032719912141	86.4626373467942	83.5083387170191	76.757801796	52.3067454298025
89.8334734719241	89.8193847752533	89.6791664988261	89.3840209380138	88.8675997034021	87.9903586730144	86.4480350330313	83.490279988723	76.7314243682142	52.2455420267007
89.8220129204803	89.8079784683974	89.6677261125166	89.3724048726416	88.8555627511204	87.9774623999752	86.4334510433644	83.4722424691819	76.7050749250882	52.184380529558
89.8105689083451	89.7965885708777	89.6563020494486	89.360805125051	88.8435422830826	87.9645831395295	86.4188853425976	83.4542261183574	76.6787534161318	52.1232608614584
89.7991414086673	89.7852150554556	89.6448942815031	89.3492216659236	88.8315382685519	87.9517208591875	86.4043378956273	83.4362308963218	76.6524597909974	52.0621829457126
89.7877303946125	89.7738578949156	89.6335027805953	89.3376544659891	88.819550676854	87.9388755265369	86.389808667442	83.4182567632579	76.6261939994788	52.0011467058566
89.7763358393627	89.7625170620647	89.622127518674	89.3261034960247	88.8075794773774	87.9260471092427	86.3752976231223	83.4003036794586	76.5999559915109	51.9401520656517
89.7649577161173	89.7511925297332	89.6107684677222	89.3145687268556	88.7956246395728	87.9132355750464	86.3608047278401	83.3823716053261	76.5737457171692	51.8791989490824
89.7535959980927	89.739884270775	89.5994255997568	89.3030501293545	88.7836861329534	87.9004408917666	86.3463299468583	83.3644605013719	76.5475631266689	51.8182872803564
89.7422506585233	89.7285922580671	89.5880988868292	89.2915476744423	88.7717639270947	87.887663027298	86.3318732455311	83.3465703282159	76.5214081703645	51.7574169839032
89.730921670661	89.7173164645106	89.5767883010253	89.2800613330874	88.7598579916343	87.8749019496118	86.3174345893027	83.3287010465865	76.4952807987494	51.6965879843732
89.7196090077759	89.7060568630305	89.5654938144651	89.2685910763064	88.747968296272	87.8621576267551	86.3030139437078	83.3108526173197	76.469180962455	51.6358002066368
89.7083126431564	89.6948134265757	89.5542153993036	89.2571368751633	88.7360948107692	87.8494300268507	86.2886112743711	83.2930250013591	76.4431086122501	51.5750535757834
89.6970325501095	89.6835861281199	89.5429530277304	89.2456987007703	88.7242375049496	87.8367191180973	86.2742265470065	83.2752181597549	76.4170636990409	51.5143480171209
89.6857687019612	89.672374940661	89.53170667197	89.2342765242872	88.7123963486981	87.8240248687686	86.2598597274173	83.2574320536643	76.3910461738696	51.4536834561741
89.6745210720562	89.6611798372217	89.5204763042818	89.2228703169219	88.7005713119616	87.8113472472136	86.2455107814959	83.2396666443501	76.3650559879145	51.3930598186842
89.6632896337589	89.6500007908499	89.5092618969602	89.2114800499301	88.6887623647485	87.7986862218563	86.231179675223	83.2219218931813	76.3390930924893	51.3324770306079
89.652074360453	89.6388377746184	89.4980634223349	89.2001056946153	88.6769694771283	87.7860417611954	86.2168663746678	83.2041977616318	76.313157439042	51.2719350181166
89.6408752255421	89.6276907616253	89.486880852771	89.1887472223288	88.6651926192321	87.773413833804	86.2025708459874	83.1864942112805	76.2872489791553	51.2114337075949
89.6296922024498	89.6165597249944	89.4757141606686	89.1774046044699	88.6534317612521	87.7608024083295	86.1882930554267	83.1688112038109	76.2613676645452	51.1509730256406
89.6185252646198	89.6054446378751	89.4645633184638	89.1660778124858	88.6416868734415	87.7482074534936	86.1740329693177	83.1511487010104	76.235513447061	51.0905528990631
89.6073743855164	89.5943454734425	89.4534282986279	89.1547668178715	88.6299579261145	87.7356289380915	86.1597905540798	83.13350666477	76.2096862786843	51.0301732548828
89.5962395386247	89.583262204898	89.4423090736681	89.1434715921699	88.6182448896462	87.7230668309925	86.1455657762188	83.1158850570842	76.183886111529	50.9698340203303
89.5851206974504	89.5721948054692	89.4312056161272	89.1321921069718	88.6065477344724	87.7105211011388	86.1313586023274	83.09828384005	76.1581128978402	50.9095351228454
89.5740178355208	89.56114324841	89.4201178985841	89.1209283339157	88.5948664310896	87.6979917175464	86.1171689990839	83.0807029758672	76.1323665899941	50.8492764900763
89.5629309263841	89.5501075070008	89.4090458936535	89.1096802446883	88.5832009500548	87.685478649304	86.1029969332528	83.0631424268373	76.1066471404972	50.7890580498787
89.5518599436102	89.539087554549	89.3979895739865	89.0984478110237	88.5715512619854	87.6729818655731	86.0888423716842	83.0456021553639	76.0809545019859	50.7288797303149
89.540804860791	89.5280833643888	89.3869489122699	89.0872310047043	88.5599173375593	87.6605013355881	86.0747052813132	83.0280821239514	76.0552886272258	50.668741459653
89.5297656515401	89.5170949098814	89.3759238812271	89.0760297975602	88.5482991475143	87.6480370286554	86.0605856291599	83.0105822952054	76.0296494691116	50.6086431663663
89.5187422894935	89.5061221644154	89.3649144536178	89.0648441614692	88.5366966626485	87.635588914154	86.0464833823293	82.9931026318318	76.004036980666	50.548584779132
89.5077347483095	89.4951651014066	89.353920602238	89.0536740683571	88.5251098538201	87.6231569615346	86.0323985080104	82.9756430966368	75.9784511150397	50.4885662268307
89.4967430016691	89.4842236942986	89.3429422999204	89.0425194901974	88.5135386919469	87.6107411403199	86.0183309734765	82.958203652526	75.9528918255105	50.4285874385453
89.4857670232759	89.4732979165626	89.3319795195341	89.0313803990117	88.5019831480067	87.598341420104	86.0042807460847	82.9407842625046	75.9273590654829	50.3686483435606
89.4748067868567	89.4623877416978	89.3210322339852	89.020256766869	88.490443193037	87.5859577705526	85.9902477932754	82.9233848896767	75.9018527884878	50.308748871362
89.4638622661616	89.4514931432313	89.3101004162162	89.0091485658864	88.4789187981345	87.5735901614024	85.9762320825724	82.906005497245	75.8763729481817	50.248888951635
89.4529334349638	89.4406140947185	89.2991840392068	88.9980557682288	88.4674099344559	87.5612385624611	85.9622335815823	82.8886460485103	75.8509194983464	50.1890685142644
89.4420202670604	89.429750569743	89.2882830759735	88.9869783461086	88.4559165732168	87.5489029436074	85.9482522579943	82.8713065068712	75.8254923928884	50.1292874893331
89.4311227362719	89.4189025419173	89.2773974995697	88.9759162717863	88.4444386856923	87.5365832747903	85.9342880795799	82.8539868358238	75.8000915858383	50.0695458071219
89.4202408164432	89.408069984882	89.266527283086	88.96486951757	88.4329762432164	87.5242795260293	85.9203410141929	82.8366869989615	75.7747170313506	50.0098433981082
89.4093744814432	89.3972528723069	89.2556723996502	88.9538380558155	88.4215292171824	87.5119916674142	85.9064110297686	82.8194069599741	75.7493686837029	49.9501801929654
89.3985237051649	89.3864511778905	89.2448328224272	88.9428218589264	88.4100975790422	87.4997196691046	85.8924980943239	82.8021466826479	75.7240464972956	49.8905561225622
89.3876884615262	89.3756648753605	89.2340085246194	88.9318208993539	88.3986813003068	87.48746350133	85.8786021759569	82.7849061308651	75.6987504266513	49.8309711179617
89.3768687244695	89.3648939384739	89.2231994794665	88.9208351495971	88.3872803525458	87.4752231343895	85.8647232428467	82.7676852686036	75.6734804264145	49.7714251104206
89.366064467962	89.3541383410168	89.2124056602456	88.9098645822026	88.3758947073872	87.4629985386514	85.8508612632531	82.7504840599365	75.6482364513508	49.7119180313885
89.3552756659962	89.3433980568051	89.2016270402713	88.8989091697648	88.3645243365178	87.4507896845536	85.837016205516	82.7333024690318	75.6230184563467	49.652449812507
89.3445022925896	89.332673059684	89.190863592896	88.8879688849255	88.3531692116825	87.4385965426026	85.8231880380556	82.7161404601521	75.597826396409	49.5930203856093
89.3337443217852	89.3219633235287	89.1801152915095	88.8770437003745	88.3418293046846	87.426419083374	85.8093767293721	82.6989979976542	75.5726602266643	49.533629682719
89.3230017276516	89.3112688222443	89.1693821095394	88.8661335888489	88.3305045873855	87.4142572775119	85.7955822480451	82.6818750459886	75.5475199023588	49.4742776360494
89.3122744842831	89.3005895297658	89.1586640204512	88.8552385231335	88.3191950317048	87.4021110957288	85.7818045627333	82.6647715696994	75.5224053788572	49.4149641780031
89.3015625657998	89.2899254200584	89.1479609977482	88.8443584760606	88.3079006096197	87.3899805088055	85.7680436421748	82.6476875334239	75.497316611643	49.3556892411709
89.290865946348	89.2792764671176	89.1372730149714	88.8334934205102	88.2966212931657	87.3778654875909	85.7542994551861	82.6306229018919	75.4722535563176	49.2964527583312
89.2801846001003	89.2686426449692	89.1266000457001	88.8226433294096	88.2853570544356	87.3657660030016	85.7405719706626	82.6135776399258	75.4472161685997	49.2372546624492
89.2695185012554	89.2580239276698	89.1159420635515	88.8118081757339	88.27410786558	87.353682026022	85.7268611575775	82.5965517124403	75.4222044043253	49.1780948866762
89.2588676240389	89.2474202893063	89.1052990421806	88.8009879325055	88.2628736988071	87.3416135277039	85.7131669849823	82.5795450844416	75.3972182194469	49.118973364349
89.2482319427027	89.2368317039967	89.0946709552811	88.7901825727941	88.2516545263824	87.3295604791664	85.6994894220059	82.5625577210273	75.3722575700331	49.0598900289888
89.237611431526	89.2262581458895	89.0840577765843	88.7793920697172	88.2404503206286	87.3175228515959	85.6858284378549	82.5455895873861	75.3473224122683	49.0008448143009
89.2270060648147	89.2156995891645	89.0734594798603	88.7686163964393	88.2292610539257	87.3055006162454	85.6721840018129	82.5286406487976	75.3224127024521	48.9418376541738
89.216415816902	89.2051560080326	89.0628760389171	88.7578555261728	88.2180866987109	87.2934937444348	85.6585560832405	82.5117108706316	75.2975283969987	48.8828684826784
89.2058406621482	89.1946273767359	89.0523074276012	88.7471094321769	88.206927227478	87.2815022075506	85.6449446515749	82.494800218348	75.2726694524368	48.8239372340674
89.1952805749413	89.1841136695476	89.0417536197976	88.7363780877585	88.1957826127781	87.2695259770454	85.6313496763298	82.4779086574965	75.2478358254092	48.7650438427746
89.1847355296967	89.1736148607728	89.0312145894295	88.7256614662717	88.1846528272188	87.2575650244383	85.6177711270949	82.4610361537162	75.2230274726718	48.7061882434141
89.1742055008578	89.1631309247477	89.0206903104589	88.7149595411178	88.1735378434643	87.2456193213143	85.6042089735359	82.4441826727351	75.1982443510936	48.6473703707797
89.1636904628956	89.1526618358406	89.0101807568863	88.7042722857456	88.1624376342356	87.2336888393239	85.5906631853942	82.4273481803701	75.1734864176565	48.5885901598442
89.1531903903092	89.1422075684512	88.9996859027505	88.6935996736508	88.1513521723099	87.2217735501837	85.5771337324864	82.4105326425265	75.1487536294542	48.5298475457586
89.142705257626	89.1317680970113	88.9892057221293	88.6829416783764	88.1402814305208	87.2098734256754	85.5636205847042	82.3937360251978	75.1240459436922	48.4711424638517
89.1322350394015	89.1213433959847	88.978740189139	88.6722982735128	88.1292253817582	87.1979884376462	85.5501237120146	82.3769582944649	75.0993633176873	48.4124748496289
89.1217797102198	89.1109334398671	88.9682892779348	88.6616694326973	88.1181839989679	87.1861185580081	85.5366430844586	82.3601994164966	75.0747057088674	48.3538446387721
89.1113392446933	89.1005382031865	88.9578529627104	88.6510551296142	88.107157255152	87.1742637587383	85.5231786721522	82.3434593575486	75.0500730747704	48.2952517671385
89.1009136174635	89.0901576605032	88.9474312176986	88.6404553379952	88.0961451233682	87.1624240118785	85.5097304452851	82.3267380839633	75.0254653730447	48.2366961707604
89.0905028032003	89.0797917864098	88.9370240171708	88.6298700316188	88.0851475767303	87.1505992895351	85.4962983741212	82.3100355621699	75.0008825614479	48.1781777858443
89.0801067766029	89.0694405555315	88.9266313354375	88.6192991843106	88.0741645884075	87.1387895638787	85.4828824289977	82.2933517586835	74.976324597847	48.1196965487701
89.0697255123992	89.0591039425259	88.916253146848	88.6087427699431	88.0631961316247	87.1269948071442	85.4694825803256	82.2766866401053	74.9517914402177	48.0612523960908
89.0593589853467	89.0487819220833	88.9058894257907	88.5982007624359	88.0522421796623	87.1152149916305	85.4560987985888	82.2600401731219	74.9272830466441	48.0028452645314
89.0490071702319	89.0384744689269	88.8955401466928	88.5876731357554	88.0413027058561	87.1034500897003	85.4427310543441	82.2434123245051	74.9027993753182	47.9444750909886
89.0386700418709	89.0281815578125	88.8852052840208	88.5771598639148	88.0303776835971	87.09170007378	85.4293793182213	82.2268030611119	74.8783403845395	47.8861418125302
89.0283475751093	89.017903163529	88.87488481228	88.5666609209744	88.0194670863313	87.0799649163595	85.4160435609222	82.2102123498837	74.8539060327148	47.8278453663939
89.0180397448224	89.0076392608984	88.8645787060151	88.556176281041	88.0085708875601	87.0682445899919	85.4027237532211	82.1936401578463	74.8294962783574	47.7695856899874
89.0077465259153	88.9973898247754	88.8542869398096	88.5457059182684	87.9976890608395	87.0565390672935	85.3894198659642	82.1770864521095	74.805111080087	47.7113627208873
88.9974678933231	88.9871548300484	88.8440094882864	88.5352498068571	87.9868215797806	87.0448483209436	85.3761318700695	82.1605511998669	74.7807503966294	47.6531763968386
88.9872038220107	88.9769342516387	88.8337463261077	88.5248079210542	87.9759684180489	87.0331723236842	85.3628597365264	82.1440343683954	74.7564141868156	47.5950266557538
88.9769542869733	88.966728064501	88.8234974279745	88.5143802351536	87.965129549365	87.0215110483201	85.3496034363954	82.1275359250552	74.732102409582	47.5369134357128
88.9667192632363	88.9565362436236	88.8132627686276	88.5039667234957	87.9543049475035	87.0098644677183	85.3363629408085	82.1110558372891	74.7078150239695	47.478836674962
88.9564987258554	88.9463587640281	88.8030423228466	88.4935673604676	87.9434945862938	86.9982325548082	85.323138220968	82.0945940726227	74.6835519891237	47.4207963119134
88.9462926499168	88.9361956007698	88.7928360654508	88.4831821205028	87.9326984396195	86.9866152825814	85.309929248147	82.0781505986636	74.6593132642936	47.3627922851446
88.9361010105374	88.9260467289377	88.7826439712985	88.4728109780817	87.9219164814182	86.9750126240911	85.2967359936891	82.0617253831015	74.6350988088324	47.3048245333975
88.9259237828645	88.9159121236545	88.7724660152876	88.4624539077306	87.9111486856818	86.9634245524527	85.2835584290077	82.0453183937077	74.6109085821959	47.2468929955783
88.9157609420763	88.9057917600765	88.7623021723554	88.4521108840227	87.9003950264561	86.9518510408428	85.2703965255862	82.0289295983347	74.5867425439431	47.1889976107565
88.9056124633819	88.8956856133943	88.7521524174783	88.4417818815774	87.889655477841	86.9402920624998	85.2572502549777	82.0125589649164	74.5626006537353	47.1311383181644
88.8954783220214	88.8855936588321	88.7420167256725	88.4314668750605	87.8789300139899	86.9287475907231	85.2441195888048	81.9962064614672	74.5384828713357	47.0733150571966
88.8853584932658	88.8755158716482	88.7318950719935	88.4211658391842	87.8682186091099	86.9172175988732	85.2310044987591	81.9798720560821	74.5143891566092	47.0155277674093
88.8752529524174	88.8654522271352	88.7217874315362	88.4108787487068	87.8575212374618	86.9057020603717	85.2179049566013	81.9635557169364	74.4903194695222	46.9577763885196
88.8651616748097	88.8554027006195	88.7116937794351	88.4006055784329	87.8468378733599	86.8942009487007	85.2048209341609	81.9472574122852	74.4662737701417	46.9000608604053
88.8550846358077	88.8453672674621	88.7016140908641	88.3903463032135	87.8361684911716	86.8827142374032	85.1917524033359	81.9309771104633	74.4422520186355	46.8423811231037
88.8450218108076	88.835345903058	88.6915483410367	88.3801008979454	87.8255130653178	86.8712419000825	85.1786993360925	81.914714779885	74.4182541752713	46.7847371168118
88.8349731752373	88.8253385828367	88.681496505206	88.3698693375718	87.8148715702724	86.859783910402	85.1656617044653	81.8984703890434	74.3942802004168	46.7271287818849
88.8249387045562	88.815345282262	88.6714585586645	88.3596515970819	87.8042439805626	86.8483402420854	85.1526394805564	81.8822439065106	74.370330054539	46.6695560588366
88.8149183742556	88.8053659768324	88.6614344767445	88.3494476515107	87.7936302707681	86.8369108689163	85.1396326365359	81.8660353009373	74.346403698204	46.6120188883381
88.8049121598585	88.7954006420808	88.6514242348176	88.3392574759396	87.7830304155218	86.8254957647381	85.1266411446412	81.8498445410524	74.3225010920767	46.5545172112174
88.7949200369197	88.7854492535747	88.6414278082952	88.3290810454956	87.7724443895092	86.8140949034538	85.1136649771768	81.8336715956626	74.2986221969203	46.497050968459
88.7849419810261	88.7755117869162	88.6314451726283	88.3189183353517	87.7618721674684	86.8027082590258	85.1007041065144	81.8175164336527	74.2747669735958	46.4396201012032
88.7749779677966	88.7655882177423	88.6214763033075	88.3087693207267	87.7513137241902	86.7913358054758	85.0877585050925	81.8013790239845	74.2509353830621	46.3822245507457
88.7650279728822	88.7556785217245	88.6115211758631	88.2986339768854	87.7407690345175	86.7799775168847	85.074828145416	81.7852593356974	74.2271273863751	46.3248642585367
88.7550919719661	88.7457826745694	88.6015797658649	88.2885122791381	87.7302380733458	86.7686333673923	85.0619130000564	81.7691573379074	74.2033429446879	46.2675391661807
88.745169940764	88.7359006520184	88.5916520489224	88.278404202841	87.7197208156227	86.7573033311974	85.0490130416513	81.7530729998073	74.1795820192499	46.2102492154359
88.7352618550237	88.7260324298476	88.581738000685	88.2683097233959	87.7092172363479	86.7459873825571	85.0361282429042	81.7370062906663	74.1558445714069	46.1529943482134
88.7253676905256	88.7161779838685	88.5718375968414	88.2582288162503	87.6987273105731	86.7346854957874	85.0232585765843	81.7209571798295	74.1321305626006	46.0957745065769
88.7154874230826	88.7063372899273	88.5619508131203	88.248161456897	87.688251013402	86.7233976452623	85.0104040155264	81.704925636718	74.1084399543679	46.0385896327419
88.7056210285401	88.6965103239055	88.55207762529	88.2381076208747	87.6777883199899	86.7121238054142	84.9975645326308	81.6889116308286	74.0847727083413	45.9814396690757
88.6957684827763	88.6866970617195	88.5422180091583	88.2280672837674	87.6673392055439	86.7008639507334	84.9847401008626	81.6729151317332	74.0611287862478	45.9243245580962
88.6859297617021	88.6768974793211	88.532371940573	88.2180404212045	87.6569036453229	86.6896180557682	84.9719306932521	81.6569361090789	74.0375081499092	45.8672442424718
88.6761048412612	88.6671115526973	88.5225393954215	88.2080270088609	87.6464816146369	86.6783860951246	84.959136282894	81.6409745325875	74.0139107612411	45.8101986650206
88.6662936974302	88.6573392578702	88.5127203496308	88.1980270224568	87.6360730888475	86.6671680434659	84.9463568429478	81.6250303720556	73.9903365822533	45.7531877687101
88.6564963062186	88.6475805708974	88.5029147791678	88.1880404377575	87.6256780433676	86.6559638755132	84.9335923466373	81.6091035973537	73.9667855750487	45.6962114966567
88.646712643669	88.6378354678719	88.493122660039	88.178067230574	87.6152964536613	86.6447735660445	84.9208427672502	81.5931941784268	73.9432577018238	45.6392697921249
88.636942685857	88.6281039249218	88.4833439682906	88.1681073767619	87.6049282952436	86.6335970898953	84.9081080781381	81.5773020852932	73.9197529248674	45.5823625985269
88.6271864088913	88.618385918211	88.4735786800085	88.1581608522226	87.5945735436806	86.6224344219575	84.8953882527166	81.5614272880452	73.8962712065612	45.5254898594224
88.6174437889139	88.6086814239387	88.4638267713186	88.1482276329019	87.5842321745894	86.6112855371803	84.8826832644645	81.545569756848	73.8728125093788	45.4686515185174
88.6077148021002	88.5989904183397	88.454088218386	88.1383076947912	87.5739041636376	86.6001504105693	84.869993086924	81.5297294619401	73.8493767958858	45.4118475196645
88.5979994246586	88.5893128776843	88.4443629974161	88.1284010139267	87.5635894865436	86.5890290171865	84.8573176937005	81.5139063736327	73.8259640287393	45.3550778068618
88.5882976328312	88.5796487782783	88.4346510846537	88.1185075663894	87.5532881190765	86.5779213321506	84.8446570584621	81.4981004623095	73.8025741706873	45.2983423242526
88.5786094028934	88.5699980964635	88.4249524563832	88.1086273283055	87.5430000370557	86.566827330636	84.8320111549399	81.4823116984266	73.7792071845691	45.2416410161249
88.5689347111541	88.560360808617	88.415267088929	88.0987602758458	87.5327252163509	86.5557469878735	84.8193799569272	81.466540052512	73.7558630333143	45.1849738269108
88.5592735339558	88.5507368911518	88.4055949586551	88.0889063852259	87.5224636328823	86.5446802791498	84.8067634382798	81.4507854951656	73.7325416799426	45.1283407011864
88.5496258476746	88.5411263205165	88.3959360419651	88.0790656327064	87.5122152626201	86.533627179807	84.7941615729156	81.4350479970589	73.7092430875638	45.0717415836707
88.5399916287203	88.5315290731957	88.3862903153025	88.0692379945922	87.5019800815845	86.5225876652431	84.7815743348144	81.4193275289347	73.6859672193772	45.0151764192254
88.5303708535365	88.5219451257095	88.3766577551504	88.0594234472331	87.4917580658458	86.5115617109115	84.7690016980179	81.4036240616067	73.6627140386714	44.9586451528547
88.5207634986005	88.5123744546143	88.3670383380314	88.0496219670235	87.4815491915242	86.5005492923208	84.7564436366292	81.3879375659598	73.639483508824	44.9021477297043
88.5111695404233	88.5028170365019	88.3574320405082	88.0398335304021	87.4713534347895	86.4895503850348	84.7439001248127	81.3722680129492	73.6162755933012	44.8456840950611
88.50158895555	88.4932728480001	88.3478388391828	88.0300581138524	87.4611707718611	86.4785649646723	84.7313711367941	81.3566153736005	73.5930902556575	44.789254194353
88.4920217205596	88.4837418657729	88.3382587106971	88.0202956939022	87.4510011790082	86.467593006907	84.7188566468601	81.3409796190096	73.5699274595354	44.732857973148
88.4824678120649	88.4742240665199	88.3286916317326	88.0105462471234	87.4408446325494	86.4566344874672	84.7063566293581	81.3253607203423	73.5467871686654	44.6764953771541
88.4729272067129	88.4647194269771	88.3191375790103	88.0008097501327	87.4307011088525	86.4456893821359	84.6938710586961	81.3097586488337	73.523669346865	44.6201663522184
88.4633998811846	88.455227923916	88.3095965292911	87.9910861795907	87.4205705843346	86.4347576667504	84.6813999093426	81.2941733757889	73.5005739580391	44.5638708443272
88.4538858121952	88.4457495341445	88.3000684593753	87.9813755122023	87.410453035462	86.4238393172023	84.6689431558264	81.2786048725817	73.4775009661793	44.5076087996049
88.444384976494	88.4362842345064	88.2905533461031	87.9716777247168	87.4003484387502	86.4129343094374	84.6565007727362	81.2630531106552	73.4544503353639	44.451380164314
88.4348973508644	88.4268320018817	88.281051166354	87.9619927939273	87.3902567707633	86.4020426194555	84.6440727347205	81.247518061521	73.4314220297571	44.3951848848545
88.4254229121243	88.4173928131865	88.2715618970472	87.952320696671	87.3801780081147	86.3911642233102	84.6316590164878	81.2319996967594	73.4084160136093	44.3390229077634
88.4159616371256	88.4079666453728	88.2620855151418	87.9426614098292	87.3701121274661	86.3802990971087	84.6192595928058	81.2164979880189	73.3854322512563	44.2828941797142
88.4065135027548	88.3985534754289	88.2526219976359	87.9330149103272	87.3600591055282	86.369447217012	84.6068744385016	81.2010129070161	73.3624707071194	44.2267986475166
88.3970784859325	88.3891532803795	88.2431713215677	87.9233811751339	87.3500189190602	86.3586085592343	84.5945035284615	81.1855444255354	73.3395313457049	44.1707362581159
88.387656563614	88.379766037285	88.2337334640147	87.9137601812623	87.3399915448695	86.3477831000432	84.5821468376308	81.1700925154288	73.3166141316037	44.1147069585928
88.3782477127887	88.3703917232424	88.2243084020938	87.9041519057692	87.3299769598122	86.3369708157595	84.5698043410134	81.1546571486158	73.2937190294914	44.0587106961624
88.3688519104807	88.3610303153848	88.2148961129618	87.8945563257549	87.3199751407925	86.3261716827568	84.557476013672	81.1392382970829	73.2708460041275	44.0027474181744
88.3594691337488	88.3516817908815	88.2054965738146	87.8849734183634	87.3099860647628	86.3153856774617	84.5451618307275	81.1238359328837	73.2479950203556	43.9468170721124
88.3500993596859	88.3423461269381	88.1961097618879	87.8754031607826	87.3000097087234	86.3046127763536	84.5328617673592	81.1084500281384	73.2251660431027	43.8909196055932
88.3407425654197	88.3330233007964	88.1867356544566	87.8658455302435	87.2900460497229	86.2938529559643	84.5205757988045	81.0930805550338	73.2023590373793	43.8350549663669
88.3313987281127	88.3237132897346	88.1773742288354	87.856300504021	87.2800950648574	86.2831061928782	84.5083039003585	81.077727485823	73.1795739682786	43.7792231023159
88.3220678249618	88.3144160710672	88.1680254623781	87.8467680594332	87.2701567312711	86.2723724637319	84.4960460473743	81.0623907928251	73.1568108009771	43.7234239614549
88.3127498331986	88.3051316221448	88.158689332478	87.8372481738416	87.2602310261556	86.2616517452141	84.4838022152623	81.047070448425	73.1340695007331	43.6676574919302
88.3034447300896	88.2958599203547	88.1493658165681	87.8277408246512	87.2503179267503	86.2509440140659	84.4715723794904	81.0317664250735	73.1113500328876	43.6119236420196
88.2941524929358	88.2866009431202	88.1400548921203	87.81824598931	87.2404174103418	86.2402492470798	84.4593565155835	81.0164786952866	73.0886523628632	43.5562223601314
88.2848730990732	88.2773546679011	88.1307565366463	87.8087636453095	87.2305294542643	86.2295674211005	84.4471545991239	81.0012072316456	73.0659764561643	43.5005535948046
88.2756065258724	88.2681210721936	88.1214707276969	87.799293770184	87.2206540358993	86.218898513024	84.4349666057503	80.9859520067968	73.0433222783765	43.444917294708
88.2663527507389	88.2589001335301	88.1121974428622	87.7898363415113	87.2107911326754	86.208242499798	84.4227925111585	80.9707129934512	73.0206897951667	43.3893134086403
88.257111751113	88.2496918294795	88.1029366597717	87.7803913369119	87.2009407220682	86.1975993584215	84.4106322911004	80.9554901643846	72.9980789722824	43.3337418855291
88.2478835044701	88.2404961376473	88.0936883560943	87.7709587340495	87.1911027816003	86.1869690659446	84.3984859213847	80.940283492437	72.9754897755517	43.2782026744308
88.2386679883202	88.2313130356749	88.0844525095379	87.7615385106305	87.1812772888415	86.1763515994687	84.3863533778759	80.9250929505126	72.9529221708829	43.2226957245302
88.2294651802084	88.2221425012405	88.0752290978498	87.7521306444045	87.1714642214081	86.1657469361461	84.3742346364946	80.9099185115796	72.9303761242645	43.16722098514
88.2202750577146	88.2129845120587	88.0660180988164	87.7427351131635	87.161663556963	86.1551550531798	84.3621296732173	80.89476014867	72.9078516017646	43.1117784057005
88.2110975984539	88.2038390458802	88.0568194902636	87.7333518947425	87.151875273216	86.1445759278235	84.3500384640762	80.8796178348793	72.8853485695307	43.0563679357792
88.2019327800762	88.1947060804925	88.047633250056	87.7239809670191	87.1420993479233	86.1340095373817	84.337960985159	80.8644915433662	72.8628669937897	43.0009895250699
88.1927805802664	88.1855855937193	88.0384593560978	87.7146223079136	87.1323357588873	86.123455859209	84.3258972126085	80.8493812473529	72.8404068408472	42.9456431233933
88.1836409767446	88.1764775634208	88.029297786332	87.7052758953888	87.1225844839571	86.1129148707105	84.313847122623	80.8342869201241	72.8179680770876	42.8903286806957
88.1745139472658	88.1673819674935	88.0201485187408	87.69594170745	87.1128455010278	86.1023865493415	84.3018106914556	80.8192085350276	72.7955506689737	42.8350461470489
88.1653994696202	88.1582987838707	88.0110115313455	87.6866197221451	87.1031187880405	86.0918708726072	84.2897878954144	80.8041460654736	72.7731545830465	42.77979547265
88.1562975216328	88.1492279905217	88.0018868022065	87.677309917564	87.0934043229825	86.0813678180627	84.2777787108621	80.7890994849346	72.7507797859249	42.7245766078206
88.1472080811641	88.1401695654524	87.9927743094231	87.6680122718394	87.083702083887	86.070877363313	84.2657831142158	80.7740687669453	72.7284262443053	42.669389503007
88.1381311261093	88.1311234867053	87.9836740311336	87.658726763146	87.0740120488331	86.0603994860126	84.2538010819473	80.7590538851024	72.7060939249617	42.6142341087792
88.1290666343992	88.1220897323591	87.9745859455155	87.6494533697008	87.0643341959455	86.0499341638658	84.2418325905822	80.7440548130643	72.6837827947451	42.5591103758309
88.1200145839993	88.1130682805292	87.9655100307849	87.6401920697628	87.0546685033947	86.0394813746259	84.2298776167005	80.7290715245508	72.6614928205833	42.5040182549788
88.1109749529105	88.1040591093671	87.956446265197	87.6309428416334	87.0450149493965	86.0290410960957	84.2179361369358	80.7141039933433	72.639223969481	42.4489576971627
88.1019477191689	88.095062197061	87.9473946270459	87.6217056636556	87.0353735122125	86.0186133061271	84.2060081279756	80.6991521932843	72.616976208519	42.3939286534447
88.0929328608457	88.0860775218355	87.9383550946645	87.6124805142148	87.0257441701493	86.008197982621	84.1940935665608	80.6842160982771	72.5947495048544	42.338931075009
88.0839303560472	88.0771050619516	87.9293276464246	87.6032673717381	87.0161269015592	85.9977951035272	84.182192429486	80.669295682286	72.57254382572	42.2839649131613
88.0749401829152	88.0681447957066	87.9203122607367	87.5940662146943	87.0065216848392	85.9874046468442	84.1703046935987	80.6543909193357	72.5503591384245	42.2290301193289
88.0659623196264	88.0591967014343	87.9113089160501	87.5848770215942	86.9969284984316	85.9770265906191	84.1584303357997	80.6395017835114	72.5281954103517	42.1741266450598
88.0569967443929	88.0502607575052	87.9023175908529	87.5756997709903	86.9873473208239	85.9666609129477	84.1465693330428	80.6246282489586	72.5060526089608	42.1192544420227
88.048043435462	88.0413369423257	87.8933382636719	87.5665344414767	86.9777781305481	85.956307591974	84.1347216623343	80.6097702898826	72.4839307017856	42.0644134620065
88.0391023711164	88.032425234339	87.8843709130725	87.5573810116892	86.9682209061812	85.9459666058903	84.1228873007334	80.5949278805486	72.4618296564349	42.0096036569199
88.0301735296737	88.0235256120246	87.8754155176589	87.548239460305	86.958675626345	85.9356379329369	84.1110662253517	80.5801009952816	72.4397494405916	41.9548249787911
88.0212568894871	88.0146380538983	87.8664720560737	87.5391097660428	86.9491422697056	85.9253215514024	84.0992584133532	80.5652896084659	72.417690022013	41.9000773797674
88.012352428945	88.0057625385124	87.8575405069984	87.5299919076629	86.939620814974	85.9150174396231	84.0874638419538	80.550493694545	72.3956513685303	41.8453608121148
88.0034601264708	87.9968990444556	87.8486208491527	87.5208858639667	86.9301112409053	85.904725575983	84.0756824884216	80.5357132280216	72.3736334480482	41.7906752282177
87.9945799605236	87.9880475503528	87.8397130612951	87.5117916137971	86.9206135262992	85.8944459389138	84.0639143300768	80.5209481834574	72.351636228545	41.7360205805788
87.9857119095975	87.9792080348654	87.8308171222224	87.5027091360381	86.9111276499994	85.8841785068948	84.0521593442908	80.5061985354725	72.3296596780724	41.6813968218182
87.9768559522219	87.9703804766912	87.8219330107701	87.493638409615	86.9016535908939	85.8739232584526	84.040417508487	80.4914642587459	72.3077037647547	41.6268039046734
87.9680120669616	87.9615648545642	87.8130607058119	87.484579413494	86.8921913279146	85.8636801721611	84.0286888001401	80.4767453280148	72.2857684567894	41.5722417819989
87.9591802324166	87.9527611472548	87.8042001862599	87.4755321266826	86.8827408400377	85.8534492266414	84.0169731967759	80.4620417180744	72.2638537224461	41.5177104067659
87.9503604272224	87.9439693335697	87.7953514310647	87.466496528229	86.8733021062828	85.8432304005614	84.0052706759716	80.4473534037781	72.241959530067	41.4632097320619
87.9415526300495	87.9351893923521	87.7865144192151	87.4574725972227	86.8638751057137	85.8330236726362	83.9935812153551	80.4326803600371	72.2200858480663	41.4087397110902
87.9327568196038	87.9264213024811	87.7776891297383	87.4484603127937	86.8544598174376	85.8228290216277	83.9819047926053	80.4180225618202	72.1982326449298	41.35430029717
87.9239729746266	87.9176650428725	87.7688755416997	87.4394596541129	86.8450562206054	85.8126464263441	83.9702413854518	80.4033799841536	72.1763998892152	41.2998914437354
87.9152010738944	87.9089205924781	87.760073634203	87.4304706003921	86.8356642944115	85.8024758656404	83.9585909716745	80.3887526021209	72.1545875495515	41.2455131043358
87.906441096219	87.9001879302861	87.7512833863898	87.4214931308836	86.8262840180938	85.7923173184183	83.9469535291041	80.3741403908627	72.1327955946388	41.1911652326349
87.8976930204476	87.8914670353208	87.7425047774402	87.4125272248802	86.8169153709334	85.7821707636252	83.935329035621	80.3595433255765	72.1110239932481	41.1368477824109
87.8889568254625	87.8827578866429	87.7337377865723	87.4035728617157	86.8075583322545	85.7720361802553	83.9237174691562	80.3449613815167	72.0892727142212	41.0825607075557
87.8802324901815	87.8740604633493	87.7249823930421	87.3946300207639	86.7982128814248	85.7619135473484	83.9121188076903	80.3303945339941	72.0675417264703	41.0283039620749
87.8715199935574	87.865374744573	87.716238576144	87.3856986814391	86.7888789978549	85.7518028439906	83.900533029254	80.3158427583762	72.0458309989779	40.9740775000876
87.8628193145787	87.8567007094832	87.70750631521	87.3767788231963	86.779556660998	85.7417040493137	83.8889601119275	80.3013060300863	72.0241405007965	40.9198812758254
87.8541304322688	87.8480383372854	87.6987855896104	87.3678704255305	86.7702458503508	85.7316171424952	83.8774000338404	80.2867843246042	72.0024702010485	40.8657152436329
87.8454533256865	87.839387607221	87.6900763787532	87.3589734679768	86.7609465454522	85.7215421027582	83.865852773172	80.2722776174653	71.9808200689259	40.8115793579667
87.8367879739259	87.8307484985679	87.6813786620845	87.3500879301109	86.7516587258842	85.7114789093715	83.8543183081506	80.2577858842608	71.9591900736899	40.7574735733956
87.8281343561164	87.8221209906397	87.672692419088	87.3412137915483	86.7423823712712	85.7014275416489	83.8427966170537	80.2433091006375	71.9375801846711	40.7033978446
87.8194924514225	87.8135050627864	87.6640176292855	87.3323510319445	86.7331174612801	85.6913879789499	83.8312876782078	80.2288472422976	71.9159903712689	40.6493521263715
87.8108622390442	87.804900694394	87.6553542722364	87.3234996309952	86.7238639756203	85.6813602006787	83.8197914699881	80.2144002849984	71.8944206029515	40.5953363736129
87.8022436982165	87.7963078648846	87.6467023275378	87.3146595684358	86.7146218940434	85.671344186285	83.8083079708186	80.1999682045524	71.8728708492556	40.5413505413376
87.7936368082096	87.7877265537163	87.6380617748247	87.3058308240417	86.7053911963434	85.661339915263	83.7968371591718	80.1855509768269	71.8513410797862	40.4873945846693
87.7850415483293	87.7791567403832	87.6294325937696	87.2970133776281	86.6961718623563	85.651347367152	83.7853790135686	80.1711485777439	71.8298312642164	40.4334684588419
87.7764578979161	87.7705984044153	87.6208147640827	87.2882072090498	86.6869638719603	85.6413665215359	83.7739335125782	80.15676098328	71.8083413722873	40.3795721191991
87.7678858363462	87.762051525379	87.6122082655117	87.2794122982013	86.6777672050754	85.631397358043	83.7625006348179	80.1423881694661	71.7868713738075	40.3257055211941
87.7593253430306	87.7535160828761	87.6036130778419	87.2706286250167	86.6685818416637	85.6214398563464	83.7510803589531	80.1280301123875	71.7654212386531	40.2718686203889
87.7507763974157	87.7449920565448	87.5950291808962	87.2618561694698	86.6594077617289	85.6114939961633	83.7396726636969	80.1136867881834	71.7439909367676	40.2180613724548
87.7422389789831	87.7364794260591	87.5864565545347	87.2530949115736	86.6502449453165	85.6015597572552	83.7282775278103	80.099358173047	71.7225804381615	40.1642837331713
87.7337130672494	87.7279781711286	87.5778951786552	87.2443448313807	86.6410933725136	85.5916371194279	83.7168949301018	80.0850442432251	71.7011897129119	40.1105356584264
87.7251986417664	87.7194882714992	87.5693450331927	87.2356059089829	86.6319530234488	85.5817260625309	83.7055248494273	80.0707449750183	71.679818731163	40.0568171042158
87.7166956821211	87.7110097069525	87.5608060981196	87.2268781245114	86.6228238782922	85.5718265664579	83.6941672646903	80.0564603447805	71.658467463125	40.0031280266431
87.7082041679356	87.7025424573059	87.5522783534457	87.2181614581365	86.6137059172552	85.5619386111462	83.682822154841	80.0421903289188	71.6371358790747	39.949468381919
87.6997240788672	87.6940865024125	87.5437617792179	87.2094558900678	86.6045991205905	85.552062176577	83.6714894988772	80.0279349038935	71.6158239493546	39.8958381263614
87.6912553946082	87.6856418221613	87.5352563555204	87.2007614005539	86.595503468592	85.5421972427748	83.6601692758434	80.0136940462177	71.5945316443732	39.842237216395
87.6827980948859	87.6772083964773	87.5267620624746	87.1920779698824	86.5864189415946	85.5323437898077	83.6488614648308	79.9994677324575	71.5732589346048	39.7886656085507
87.6743521594628	87.6687862053207	87.5182788802389	87.1834055783798	86.5773455199743	85.5225017977873	83.6375660449773	79.9852559392315	71.5520057905888	39.735123259466
87.6659175681365	87.6603752286878	87.5098067890089	87.1747442064117	86.5682831841478	85.5126712468683	83.6262829954675	79.9710586432108	71.5307721829301	39.6816101258838
87.6574943007394	87.6519754466106	87.5013457690173	87.1660938343823	86.5592319145731	85.5028521172485	83.6150122955323	79.9568758211187	71.5095580822984	39.628126164653
87.6490823371393	87.6435868391565	87.4928958005336	87.1574544427347	86.5501916917484	85.4930443891688	83.6037539244489	79.9427074497308	71.4883634594284	39.5746713327276
87.6406816572386	87.6352093864288	87.4844568638645	87.1488260119507	86.5411624962129	85.483248042913	83.5925078615406	79.9285535058748	71.4671882851196	39.5212455871667
87.632292240975	87.6268430685662	87.4760289393534	87.1402085225507	86.5321443085463	85.4734630588078	83.5812740861767	79.9144139664301	71.4460325302355	39.4678488851341
87.6239140683211	87.6184878657431	87.4676120073808	87.1316019550937	86.5231371093687	85.4636894172226	83.5700525777725	79.9002888083277	71.4248961657042	39.4144811838982
87.6155471192843	87.6101437581695	87.4592060483639	87.1230062901771	86.5141408793407	85.4539270985692	83.558843315789	79.8861780085504	71.4037791625179	39.3611424408314
87.607191373907	87.6018107260907	87.4508110427567	87.1144215084369	86.5051555991631	85.4441760833021	83.5476462797329	79.8720815441323	71.3826814917324	39.3078326134101
87.5988468122667	87.5934887497877	87.4424269710498	87.1058475905473	86.4961812495771	85.4344363519182	83.5364614491563	79.8579993921586	71.3616031244674	39.2545516592143
87.5905134144756	87.585177809577	87.4340538137708	87.0972845172212	86.4872178113638	85.4247078849565	83.5252888036568	79.8439315297659	71.340544031906	39.2012995359275
87.5821911606809	87.5768778858103	87.4256915514838	87.0887322692092	86.4782652653446	85.4149906629983	83.5141283228771	79.8298779341415	71.3195041852946	39.1480762013361
87.5738800310646	87.568588958875	87.4173401647895	87.0801908273004	86.4693235923807	85.4052846666672	83.5029799865052	79.8158385825236	71.2984835559428	39.0948816133293
87.5655800058435	87.5603110091937	87.4089996343251	87.0716601723221	86.4603927733733	85.3955898766283	83.4918437742741	79.8018134522011	71.2774821152229	39.041715729899
87.5572910652694	87.5520440172244	87.4006699407644	87.0631402851395	86.4514727892632	85.3859062735888	83.4807196659616	79.7878025205132	71.2564998345701	38.9885785091393
87.5490131896286	87.5437879634605	87.3923510648177	87.0546311466558	86.4425636210312	85.3762338382978	83.4696076413903	79.7738057648497	71.2355366854822	38.9354699092462
87.5407463592424	87.5355428284306	87.3840429872318	87.0461327378122	86.4336652496975	85.3665725515458	83.4585076804274	79.7598231626505	71.2145926395192	38.8823898885176
87.5324905544669	87.5273085926986	87.3757456887897	87.0376450395877	86.424777656322	85.356922394165	83.4474197629847	79.7458546914055	71.1936676683034	38.8293384053528
87.5242457556928	87.5190852368636	87.3674591503108	87.0291680329991	86.415900822004	85.347283347029	83.4363438690184	79.7319003286546	71.1727617435191	38.7763154182524
87.5160119433455	87.5108727415599	87.3591833526509	87.0207016991011	86.4070347278821	85.3376553910527	83.4252799785287	79.7179600519876	71.1518748369122	38.7233208858176
87.5077890978853	87.5026710874571	87.3509182767019	87.0122460189857	86.3981793551342	85.3280385071924	83.4142280715605	79.7040338390436	71.1310069202905	38.6703547667508
87.4995771998068	87.4944802552599	87.342663903392	87.003800973783	86.3893346849777	85.3184326764454	83.4031881282021	79.6901216675116	71.1101579655232	38.6174170198545
87.4913762296396	87.4863002257079	87.3344202136855	86.9953665446602	86.3805006986687	85.30883787985	83.3921601285861	79.6762235151295	71.0893279445405	38.5645076040313
87.4831861679478	87.4781309795761	87.3261871885829	86.9869427128222	86.3716773775027	85.2992540984857	83.3811440528889	79.6623393596849	71.0685168293341	38.5116264782841
87.47500699533	87.4699724976743	87.3179648091206	86.9785294595112	86.3628647028138	85.2896813134723	83.3701398813304	79.6484691790139	71.0477245919562	38.4587736017151
87.4668386924195	87.4618247608474	87.3097530563712	86.970126766007	86.3540626559753	85.280119505971	83.359147594174	79.634612951002	71.02695120452	38.4059489335259
87.4586812398841	87.4536877499753	87.3015519114432	86.9617346136263	86.3452712183992	85.2705686571831	83.3481671717268	79.6207706535833	71.0061966391992	38.3531524330176
87.4505346184261	87.4455614459729	87.293361355481	86.9533529837234	86.3364903715361	85.2610287483507	83.3371985943391	79.6069422647404	70.9854608682277	38.3003840595899
87.4423988087823	87.4374458297898	87.2851813696648	86.9449818576895	86.3277200968753	85.2514997607563	83.3262418424042	79.5931277625047	70.9647438638999	38.2476437727412
87.4342737917241	87.4293408824108	87.2770119352107	86.9366212169529	86.3189603759447	85.2419816757226	83.3152968963587	79.5793271249557	70.94404559857	38.1949315320683
87.426159548057	87.4212465848553	87.2688530333706	86.928271042979	86.3102111903105	85.2324744746127	83.3043637366821	79.5655403302212	70.9233660446521	38.1422472972663
87.4180560586214	87.4131629181775	87.2607046454323	86.9199313172703	86.3014725215776	85.2229781388297	83.2934423438967	79.5517673564772	70.9027051746199	38.089591028128
87.4099633042917	87.4050898634667	87.2525667527189	86.9116020213659	86.2927443513887	85.2134926498168	83.2825326985676	79.5380081819475	70.8820629610068	38.0369626845441
87.4018812659769	87.3970274018465	87.2444393365894	86.9032831368418	86.2840266614252	85.204017989057	83.2716347813025	79.5242627849037	70.8614393764054	37.9843622265026
87.3938099246202	87.3889755144755	87.2363223784383	86.8949746453111	86.2753194334064	85.1945541380734	83.2607485727515	79.5105311436652	70.8408343934673	37.9317896140886
87.3857492611992	87.3809341825469	87.2282158596958	86.8866765284232	86.2666226490897	85.1851010784287	83.2498740536073	79.4968132365989	70.8202479849035	37.8792448074843
87.3776992567256	87.3729033872886	87.2201197618274	86.8783887678643	86.2579362902704	85.1756587917251	83.2390112046045	79.4831090421191	70.7996801234834	37.8267277669685
87.3696598922457	87.364883109963	87.212034066334	86.8701113453571	86.2492603387817	85.1662272596045	83.2281600065203	79.4694185386873	70.7791307820354	37.7742384529165
87.3616311488396	87.3568733318672	87.2039587547522	86.861844242661	86.2405947764947	85.1568064637482	83.2173204401736	79.4557417048123	70.758599933446	37.7217768258
87.353613007622	87.3488740343326	87.1958938086536	86.8535874415716	86.2319395853182	85.1473963858768	83.2064924864253	79.4420785190497	70.7380875506602	37.6693428461864
87.3456054497416	87.3408851987253	87.1878392096453	86.845340923921	86.2232947471986	85.1379970077504	83.1956761261783	79.4284289600021	70.7175936066813	37.616936474739
87.337608456381	87.3329068064459	87.1797949393696	86.8371046715777	86.2146602441199	85.1286083111678	83.184871340377	79.4147930063189	70.6971180745704	37.5645576722168
87.3296220087574	87.3249388389293	87.171760979504	86.8288786664464	86.2060360581036	85.1192302779672	83.1740781100074	79.4011706366959	70.6766609274465	37.5122063994737
87.3216460881217	87.3169812776448	87.1637373117612	86.8206628904677	86.1974221712085	85.1098628900256	83.163296416097	79.3875618298757	70.656222138486	37.4598826174592
87.3136806757589	87.309034104096	87.1557239178889	86.8124573256189	86.1888185655308	85.1005061292591	83.1525262397148	79.3739665646468	70.6358016809232	37.4075862872171
87.3057257529882	87.301097299821	87.14772077967	86.8042619539128	86.1802252232039	85.0911599776222	83.1417675619709	79.3603848198444	70.6153995280494	37.3553173698863
87.2978441786635	87.2932343611527	87.1397934525115	86.7961461093915	86.1717176054616	85.081909641502	83.1311217099305	79.3469474874051	70.5952144984973	37.3035864953288
87.2901926975417	87.2856036178883	87.1321053917442	86.7882826563889	86.1634838373301	85.0729675229854	83.1208412539156	79.3339808228695	70.5757422199791	37.2536686819193
87.2827702275945	87.2782039755976	87.1246554634	86.7806703881251	86.1555225929344	85.064332104374	83.1109243540553	79.3214823886766	70.5569789378291	37.2055567060335
87.2755756898133	87.2710343428475	87.1174425365576	86.7733081009517	86.1478325496166	85.0560018711604	83.1013691731282	79.3094497486598	70.5389209516979	37.1592431957913
87.2686080082089	87.264093631204	87.1104654833448	86.7661945943539	86.140412387936	85.0479753120225	83.0921738765758	79.297880470794	70.5215646009796	37.1147206569534
87.26186610981	87.2573807552339	87.10372317894	86.7593286709524	86.1332607916703	85.0402509188171	83.0833366326205	79.2867721289425	70.50490625468	37.0719814913996
87.2553489246634	87.2508946325067	87.0972145015741	86.7527091365046	86.1263764478154	85.032827186579	83.0748556124412	79.2761223039343	70.4889423043663	37.0310180104272
87.2490553858331	87.244634183596	87.0909383325316	86.7463347999067	86.1197580465856	85.0257026135247	83.0667289903747	79.265928584193	70.4736691592577	36.9918224444312
87.2429844293997	87.2385983320813	87.0848935561529	86.7402044731943	86.1134042814132	85.0188757010635	83.0589549441244	79.2561885660741	70.4590832428045	36.9543869500505
87.2371349944597	87.2327860045488	87.0790790598345	86.7343169715439	86.1073138489489	85.0123449538133	83.0515316549629	79.2468998540114	70.4451809903006	36.9187036155405
87.2315060231253	87.227196130593	87.073493734031	86.7286711132736	86.1014854490622	85.0061088796238	83.0444573079239	79.2380600605444	70.431958847217	36.8847644648968
87.2260964605234	87.2218276428174	87.0681364722562	86.7232657198442	86.0959177848423	85.0001659896023	83.0377300919782	79.2296668062722	70.4194132680351	36.8525614611031
87.2209052547955	87.2166794768355	87.0630061710831	86.7180996158592	86.0906095625997	84.9945147981449	83.0313482001932	79.2217177197662	70.4075407154305	36.822086508759
87.2159313570966	87.2117505712717	87.0581017301461	86.7131716290661	86.0855594918686	84.98915382297	83.0253098298762	79.2142104374599	70.3963376597002	36.7933314562702
87.2111737215946	87.2070398677619	87.0534220521403	86.7084805903564	86.08076628541	84.9840815851543	83.0196131827014	79.2071426035311	70.3858005783606	36.7662880977274
87.2066313054703	87.202546310954	87.0489660428232	86.7040253337661	86.0762286592149	84.9792966091708	83.0142564648219	79.2005118697824	70.3759259558653	36.740948174565
87.2021564203034	87.1981207143216	87.0445796752492	86.6996429474957	86.0717692900422	84.9745986422288	83.0090014815552	79.194010457482	70.3662461000517	36.7161080669868
87.1978954592377	87.1939109532441	87.0404156167995	86.6954948943592	86.0675639043244	84.9701860998494	83.0040841964952	79.1879432627506	70.3572245187508	36.6929611614427
87.1938473858009	87.1899159787296	87.0364727796814	86.6915800149837	86.0636112247875	84.9660575138118	82.9995028267655	79.1823079574598	70.3488576726969	36.6714991473962
87.1900111665346	87.1861347448015	87.0327500791681	86.6878971531449	86.0599099774146	84.9622114194561	82.995255594316	79.1771022186164	70.3411420403921	36.6517136465191
87.1863857709928	87.1825662084987	87.0292464335986	86.6844451557683	86.0564588914535	84.9586463557224	82.9913407258997	79.1723237290509	70.3340741146029	36.6335962197386
87.1829701717415	87.1792093298756	87.0259607643777	86.6812228729294	86.0532566994249	84.9553608651853	82.9877564530785	79.1679701778589	70.3276503999301	36.6171383724944
87.1797633443577	87.1760630720019	87.0228919959759	86.6782291578545	86.050302137131	84.9523534940873	82.9845010122467	79.164039260676	70.3218674111239	36.6023315587475
87.1767642674282	87.1731264009625	87.0200390559295	86.6754628669217	86.0475939436645	84.9496227923696	82.981572644664	79.1605286798402	70.3167216719179	36.589167184119
87.1739719225486	87.170398285857	87.0174008748399	86.6729228596617	86.045130861418	84.9471673137025	82.9789695964921	79.1574361444809	70.3122097142226	36.577636608422
87.1713852943223	87.1678776987991	87.0149763863736	86.6706079987587	86.0429116360933	84.9449856155149	82.9766901188334	79.1547593705595	70.3083280775693	36.5677311477688
87.1690033703592	87.1655636149164	87.012764527262	86.6685171500515	86.0409350167112	84.9430762590226	82.9747324677668	79.1524960808783	70.3050733087287	36.5594420763816
87.1668251412748	87.1634550123494	87.0107642373004	86.6666491825351	86.0391997556212	84.9414378092562	82.9730949043825	79.1506440050699	70.3024419614509	36.5527606281946
87.1648496006883	87.161550872251	87.0089744593478	86.6650029683614	86.0377046085116	84.9400688350885	82.9717756948136	79.149200879576	70.3004305962907	36.5476779983095
87.1630757452221	87.1598501787856	87.0073941393265	86.6635773828407	86.0364483344194	84.9389679092601	82.9707731102645	79.1481644476184	70.2990357804913	36.5441853443485
87.1615025744996	87.1583519191281	87.0060222262211	86.6623713044435	86.0354296957406	84.9381336084057	82.9700854270359	79.1475324591673	70.2982540879112	36.5422737877339
87.1601290911445	87.1570550834628	87.0048576720782	86.6613836148015	86.0346474582402	84.9375645130778	82.9697109265474	79.1473026709092	70.2980820989794	36.5419344149154
87.1589543007788	87.1559586649825	87.0038994320055	86.6606131987098	86.0341003910624	84.937259207771	82.9696478953567	79.1474728462141	70.2985164006715	36.5431582785607
87.1578407407193	87.1549238073067	87.0030041452904	86.6599084265637	86.0336234513821	84.9370313098833	82.9696746455231	79.1477565376786	70.2991216349313	36.5448242626824
87.1569246316601	87.154088108714	87.0023138662707	86.6594195323835	86.0333801395353	84.9370654272514	82.9700107267021	79.1484374436878	70.3003290668531	36.548042079168
87.1562049855795	87.1534505687903	87.0018275565444	86.6591454076612	86.0333692319038	84.9373601532025	82.9706544378397	79.1495133449637	70.3021352610237	36.5528027704227
87.1556808174522	87.1530101901278	87.001544180771	86.6590849470624	86.0335895082943	84.9379140851008	82.9716040830943	79.1509820268596	70.3045367993829	36.5590973298634
87.155351145248	87.1527659783238	87.0014627066706	86.659237048429	86.0340397519478	84.9387258243667	82.9728579717691	79.1528412800653	70.3075302779459	36.5669167086239
87.1552149899298	87.1527169419792	87.0015821050234	86.6596006127806	86.0347187495502	84.9397939764918	82.9744144182777	79.1550889010723	70.3111123045371	36.5762518205699
87.1552713754515	87.1528620926971	87.0019013496682	86.6601745443172	86.0356252912415	84.9411171510526	82.9762717421312	79.1577226924748	70.3152794972267	36.5870935461362
87.1555193287559	87.1532004450811	87.0024194175022	86.6609577504213	86.0367581706256	84.9426939617219	82.9784282679372	79.1607404631594	70.3200284832541	36.5994327353416
87.1559578797731	87.1537310167333	87.0031352884798	86.6619491416595	86.0381161847791	84.9445230262804	82.9808823254073	79.1641400284211	70.3253558982902	36.6132602102304
87.156586061418	87.1544528282533	87.0040479456115	86.6631476317855	86.0396981342606	84.9466029666269	82.9836322493674	79.1679192100282	70.331258385934	36.6285667669106
87.1574029095881	87.1553649032355	87.0051563749634	86.6645521377416	86.0415028231186	84.9489324087884	82.98667637977	79.1720758362554	70.3377325973739	36.645343177311
87.1584074631617	87.1564662682682	87.0064595656561	86.6661615796615	86.0435290589002	84.9515099829306	82.9900130617065	79.176607741895	70.3447751911615	36.6635801907375
87.1595987639951	87.1577559529308	87.0079565098632	86.6679748808719	86.0457756526588	84.9543343233668	82.9936406454185	79.1815127682545	70.3523828330647	36.683268535289
87.1609758569205	87.1592329897925	87.0096462028114	86.669990967895	86.0482414189617	84.9574040685677	82.9975574863078	79.1867887631459	70.3605521959767	36.7043989191718
87.1625377897438	87.1608964144097	87.0115276427784	86.6722087704504	86.0509251758973	84.9607178611701	83.0017619449455	79.1924335808706	70.3692799598627	36.7269620319414
87.1642836132417	87.1627452653245	87.0135998310926	86.6746272214576	86.0538257450825	84.9642743479859	83.0062523870785	79.1984450822008	70.3785628117332	36.7509485456906
87.1662123811597	87.1647785840622	87.0158617721317	86.6772452570374	86.0569419516694	84.9680721800102	83.0110271836356	79.2048211343606	70.3883974456374	36.7763491161982
87.168196264201	87.1668672464063	87.0181801555113	86.6799218818465	86.0601203355109	84.9719380698992	83.0158802487465	79.2112954940245	70.3983793450868	36.80212445039
87.1703619035563	87.1691391723126	87.0206870395276	86.6827967515184	86.0635128755306	84.9760436059249	83.0210156299432	79.2181317750777	70.4089090295361	36.8293017303131
87.1727083592979	87.1715934096822	87.0233814350731	86.6858688090445	86.067118404608	84.9803874485687	83.0264317105421	79.2253278612105	70.4199831746046	36.8578716387308
87.1752346944618	87.1742290093945	87.02626235609	86.68913700063	86.0709357591888	84.9849682625348	83.0321268790723	79.232881640716	70.4315984730002	36.8878248281319
87.1779399750447	87.1770450253049	87.0293288195683	86.6926002756959	86.0749637792897	84.9897847167569	83.0380995292047	79.2407910071469	70.4437516314974	36.9191519269629
87.1808232700011	87.1800405142425	87.0325798455454	86.6962575868808	86.0792013085049	84.9948354844014	83.0443480597124	79.2490538597495	70.4564393688512	36.9518435442903
87.1838836512409	87.1832145360076	87.0360144571045	86.7001078900425	86.0836471940104	85.0001192428689	83.0508708744508	79.2576681037462	70.4696584143606	36.9858902733673
87.1871201936257	87.1865661533697	87.0396316803736	86.7041501442597	86.0883002865694	85.0056346737951	83.0576663823511	79.2666316505139	70.4834055068829	37.0212826944342
87.1905319749665	87.1900944320644	87.0434305445245	86.7083833118334	86.0931594405365	85.0113804630512	83.064732997419	79.2759424176947	70.4976773941615	37.0580113769838
87.1941180760206	87.1937984407916	87.047410081771	86.7128063582889	86.0982235138615	85.0173553007443	83.0720691387391	79.2855983292587	70.5124708323691	37.0960668816479
87.1978775804884	87.1976772512127	87.0515693273685	86.7174182523764	86.1034913680937	85.0235578812175	83.0796732304796	79.2955973155371	70.5277825858038	37.1354397618187
87.2018095750103	87.2017299379478	87.055907319612	86.7222179660731	86.1089618683847	85.0299869030503	83.0875437018983	79.3059373132355	70.5436094266878	37.1761205650802
87.2059131491637	87.2059555785735	87.0604230998351	86.7272044745836	86.1146338834921	85.036641069059	83.0956789873471	79.316616265434	70.5599481350409	37.2180998345044
87.2101873954602	87.21035325362	87.0651157124087	86.7323767563416	86.1205062857817	85.0435190862971	83.1040775262766	79.3276321215798	70.576795498603	37.261368109849
87.2146314093415	87.2149220465686	87.0699842047396	86.7377337930104	86.1265779512303	85.0506196660555	83.1127377632387	79.3389828374748	70.5941483127923	37.3059159286832
87.2192442891772	87.2196610438488	87.0750276272689	86.7432745694843	86.1328477594282	85.0579415238631	83.1216581478889	79.3506663752617	70.6120033806884	37.3517338274596
87.223906704349	87.2244497073551	87.0801215376492	86.7488674764423	86.1391724782188	85.0653229431123	83.1306463919335	79.3624343936258	70.6299836632545	37.3978575008468
87.2287368482186	87.2294074219242	87.0853891781465	86.7546428385627	86.1456939210464	85.072924017597	83.1398928392152	79.3745327124596	70.6484623062527	37.4452388888183
87.2337338254248	87.2345332803208	87.0908296057359	86.7605996477527	86.1524109754918	85.0807434724874	83.149395951503	79.3869593099055	70.6674360989787	37.4938685854729
87.2388967435262	87.2398263782517	87.0964418804261	86.7667368991575	86.1593225327625	85.0887800372032	83.1591541956893	79.3997121687754	70.6869018475032	37.5437371711912
87.2442247129982	87.2452858143624	87.1022250652572	86.7730535911609	86.166427487694	85.0970324454136	83.1691660437222	79.4127892771472	70.7068563719312	37.5948352182632
87.2497168472294	87.2509106902344	87.1081782262995	86.7795487253856	86.173724738751	85.1054994350347	83.1794299725668	79.4261886287597	70.7272965045117	37.6471532950888
87.255372262518	87.2567001103822	87.1143004326515	86.7862213066929	86.1812131880281	85.1141797482251	83.1899444641844	79.439908223269	70.7482190883371	37.7006819693814
87.2611900780685	87.262653182251	87.1205907564387	86.7930703431833	86.1888917412505	85.1230721313813	83.2007080055225	79.4539460664115	70.7696209764527	37.755411810674
87.2671694159879	87.2687690162128	87.1270482728114	86.800094846196	86.196759307774	85.1321753351331	83.2117190885122	79.4683001701039	70.7914990312494	37.8113333923361
87.2733094012825	87.2750467255643	87.133672059943	86.8072938303088	86.2048148005852	85.1414881143385	83.2229762100686	79.4829685525015	70.8138501240535	37.8684372932445
87.2796091618539	87.2814854265234	87.1404611990284	86.8146663133377	86.213057136301	85.1510092280792	83.2344778720924	79.4979492380286	70.8366711348536	37.9267140992108
87.2860678284955	87.2880842382264	87.1474147742818	86.8222113163366	86.221485235168	85.1607374396559	83.2462225814727	79.5132402573905	70.8599589521223	37.9861544042324
87.2926845348892	87.2948422827245	87.1545318729348	86.8299278635966	86.2300980210614	85.1706715165843	83.2582088500887	79.5288396475748	70.8837104727031	38.0467488116191
87.299458417601	87.3017586849815	87.1618115852348	86.8378149826448	86.2388944214846	85.1808102305906	83.2704351948112	79.5447454518447	70.9079226017436	38.1084879350261
87.3063886160781	87.3088325728698	87.1692530044422	86.8458717042444	86.2478733675672	85.1911523576076	83.2829001375027	79.5609557197292	70.9325922526604	38.1713623994203
87.3134742726446	87.3160630771677	87.176855226829	86.8540970623929	86.2570337940637	85.2016966777705	83.2956022050167	79.5774685070098	70.9577163471255	38.2353628419937
87.3207145324979	87.3234493315562	87.1846173516763	86.8624900943212	86.2663746393522	85.2124419754132	83.308539929196	79.5942818757074	70.9832918150683	38.300479913037
87.3279986135111	87.3308794346098	87.1924238579173	86.8709286351094	86.2757629659762	85.2232381845741	83.3215349238334	79.6111655501728	71.0089694603853	38.3658267578755
87.3354362145431	87.3384641888867	87.2003891227407	86.8795336256879	86.2853303619916	85.234233830821	83.3347637284822	79.6283473978632	71.0350947142982	38.4322779840399
87.3430264869771	87.3462027343433	87.2085122519609	86.8883041103753	86.2950757738472	85.2454277080446	83.3482248867525	79.6458254964276	71.0616644981908	38.4998243260675
87.3507685850605	87.3540942138305	87.2167923543971	86.8972391367238	86.3049981516146	85.2568186143305	83.3619169472545	79.663597928278	71.0886757497494	38.5684565204006
87.3586616659011	87.3621377730905	87.2252285418718	86.9063377555175	86.3150964489852	85.2684053519553	83.3758384635354	79.6816627811168	71.1161254205585	38.6381653102468
87.3667048894633	87.3703325607529	87.2338199292076	86.9155990207708	86.3253696232682	85.2801867273799	83.3899879940424	79.7000181482857	71.1440104744424	38.7089414491908
87.3748974185637	87.378677728332	87.242565634225	86.925021989726	86.3358166353879	85.292161551243	83.4043641021011	79.7186621289934	71.1723278863259	38.7807757039324
87.3832384188677	87.3871724302229	87.2514647777396	86.9346057228521	86.3464364498805	85.3043286383523	83.4189653559041	79.7375928284611	71.2010746414532	38.8536588564141
87.391727058885	87.3958158236986	87.2605164835598	86.9443492838419	86.3572280348917	85.3166868076778	83.4337903285062	79.756808358011	71.2302477348567	38.9275817055183
87.4003625099659	87.4046070689058	87.2697198784836	86.9542517396102	86.3681903621727	85.3292348823426	83.4488375978216	79.7763068351201	71.2598441709983	39.0025350684612
87.4091439462971	87.4135453288618	87.2790740922962	86.9643121602915	86.3793224070767	85.3419716896167	83.4641057466238	79.796086383447	71.2898609635304	39.0785097819711
87.4180705448976	87.4226297694508	87.288578257767	86.9745296192372	86.3906231485559	85.3548960609086	83.4795933625456	79.8161451328449	71.3202951351399	39.1554967033116
87.4271414856148	87.4318595594207	87.2982315106467	86.984903193013	86.4020915691565	85.3680068317584	83.4952990380782	79.8364812193623	71.3511437174504	39.2334867111935
87.4363559511203	87.4412338703788	87.3080329896644	86.9954319613967	86.4137266550156	85.3813028418311	83.5112213705709	79.8570927852394	71.3824037509634	39.3124707066036
87.4457131269057	87.4507518767887	87.3179818365245	87.0061150073747	86.4255273958565	85.3947829349096	83.5273589622287	79.8779779788991	71.4140722850277	39.3924396135726
87.4552122012784	87.4604127559662	87.3280771959037	87.0169514171396	86.4374927849841	85.4084459588877	83.5437104201108	79.8991349549368	71.4461463778278	39.4733843798958
87.4648523653577	87.4702156880759	87.3383182154477	87.0279402800868	86.4496218192812	85.4222907657641	83.5602743561262	79.9205618741093	71.4786230963855	39.5552959778169
87.4745308582065	87.4800568758341	87.3485977460315	87.0389682954627	86.4617912253659	85.4361782294744	83.576885445024	79.9420454541889	71.5111795174787	39.6373615580509
87.4843494111881	87.4900390720506	87.359021849695	87.0501476018788	86.4741229975163	85.4502460174736	83.5937072607376	79.9637966817894	71.5441349469321	39.7203821783984
87.4943072215076	87.5001614630866	87.369589680577	87.0614772958014	86.4866161406162	85.4644929910955	83.6107384265631	79.9858137330607	71.5774864485771	39.8043489143041
87.5044034891714	87.5104232381423	87.3803003957784	87.0729564768922	86.4992696631157	85.4789180157656	83.6279775706558	80.0080947890327	71.6112311019583	39.8892528559919
87.514637416983	87.5208235892523	87.3911531553578	87.0845842480057	86.5120825770266	85.4935199609954	83.6454233259741	80.0306380360697	71.6453660002778	39.9750851125156
87.5250082105385	87.5313617112824	87.4021471223286	87.0963597151849	86.5250538979171	85.5082977003737	83.6630743302439	80.0534416661713	71.6798882489784	40.0618368147474
87.5355150782222	87.5420368019255	87.4132814626552	87.1082819876578	86.5381826449069	85.523250111558	83.6809292259388	80.0765038771687	71.7147949647698	40.1494991176259
87.5461572312025	87.5528480616973	87.4245553452495	87.1203501778334	86.551467840662	85.5383760762649	83.6989866602682	80.0998228728505	71.750083274961	40.2380632018836
87.5569338834271	87.5637946939327	87.435967941967	87.1325634012979	86.5649085113891	85.5536744802606	83.7172452851703	80.1233968630407	71.7857503170053	40.3275202754093
87.5678442516191	87.5748759047813	87.4475184276031	87.1449207768109	86.5785036868304	85.5691442133517	83.7357037573086	80.1472240636449	71.8217932381936	40.4178615743513
87.5788875552719	87.5860909032039	87.4592059798895	87.1574214263006	86.5922524002572	85.584784169376	83.7543607380701	80.1713026966747	71.858209195449	40.5090783640371
87.5900630166453	87.5974389009678	87.4710297794901	87.1700644748603	86.6061536884647	85.6005932461935	83.7732148935625	80.1956309902591	71.8949953551928	40.6011619397603
87.6013698607606	87.6089191126428	87.4829890099971	87.1828490507436	86.6202065917657	85.6165703456779	83.7922648946133	80.2202071786465	71.9321488932593	40.6941036274719
87.6128073153965	87.6205307555973	87.495082857927	87.1957742853604	86.6344101539845	85.6327143737079	83.8115094167668	80.2450295022012	71.9696669948446	40.7878947844004
87.6243746110842	87.6322730499935	87.5073105127167	87.2088393132717	86.6487634224505	85.649024240159	83.8309471402815	80.2700962073965	72.0075468544786	40.8825267996183
87.636070981103	87.6441452187836	87.5196711667188	87.2220432721858	86.6632654479925	85.6654988588954	83.8505767501263	80.2954055468065	72.0457856760137	40.9779910945687
87.647800715662	87.6560505888727	87.5320650308347	87.2352806547618	86.6778014548167	85.6820087249318	83.8702444119198	80.3207592019564	72.0840837205742	41.0735405501865
87.659658545032	87.6680848397986	87.5445908605738	87.2486558645528	86.6924850053455	85.698681959969	83.8901022960996	80.3463533018274	72.1227372647404	41.1699111604687
87.6716437084705	87.6802472006149	87.557247854703	87.2621680462471	86.7073151582495	85.7155174869319	83.9101490986648	80.3721861142508	72.1617435140696	41.2670944609235
87.6837554479714	87.6925369031534	87.5700352148941	87.2758163476672	86.7222909756807	85.7325142327169	83.9303835203361	80.3982559120565	72.2010996891786	41.3650820112608
87.6959930082604	87.7049531820192	87.5829521457198	87.2895999197649	86.7374115232662	85.7496711281837	83.9508042665063	80.4245609734574	72.2408030240182	41.4638653986839
87.7083556367898	87.7174952745866	87.5959978546489	87.3035179166162	86.7526758701014	85.7669871081466	83.9714100472089	80.4510995823031	72.2808507646835	41.5634362402986
87.7208425837345	87.7301624209945	87.6091715520416	87.317569495416	86.7680830887434	85.7844611113649	83.9921995770989	80.4778700282473	72.3212401685957	41.6637861849049
87.7334531019866	87.7429538641416	87.6224724511456	87.3317538164732	86.7836322552045	85.8020920805327	84.0131715754408	80.5048706068542	72.3619685039404	41.764906914356
87.7461864471508	87.7558688496821	87.6358997680906	87.346070043205	86.7993224489451	85.8198789622688	84.0343247661016	80.5320996196651	72.4030330492846	41.8667901446131
87.7590418775398	87.7689066260213	87.6494527218843	87.3605173421318	86.8151527528667	85.8378207071066	84.055657877546	80.5595553742379	72.4444310933172	41.9694276265841
87.772018654169	87.7820664443102	87.6631305344075	87.3750948828716	86.8311222533049	85.8559162694848	84.0771696428329	80.5872361841686	72.4861599346749	42.0728111468091
87.7851160407523	87.7953475584416	87.6769324304088	87.3898018381346	86.8472300400221	85.874164607737	84.0988587996126	80.6151403691007	72.5282168818278	42.1769325280351
87.7983333036964	87.8087492250449	87.6908576375006	87.4046373837175	86.8634752062004	85.8925646840832	84.1207240901238	80.6432662547276	72.5705992530051	42.2817836297106
87.8116697120968	87.8222707034814	87.7049053861534	87.4196006984978	86.8798568484341	85.91111546462	84.14276426119	80.6716121727893	72.6133043761502	42.3873563484206
87.8251245377322	87.8359112558396	87.7190749096912	87.4346909644282	86.8963740667224	85.929815919312	84.1649780642163	80.7001764610674	72.6563295888948	42.4936426182764
87.8386970550598	87.8496701469302	87.7333654442866	87.4499073665305	86.9130259644618	85.948665021983	84.1873642551847	80.7289574633771	72.6996722385462	42.6006344112712
87.8523865412102	87.8635466442815	87.7477762289553	87.4652490928899	86.9298116484384	85.967661750307	84.2099215946497	80.7579535295594	72.7433296820844	42.7083237376089
87.8661043529861	87.8774512146131	87.7622148508715	87.4806184468719	86.9466248593744	85.9866862422536	84.2325077672923	80.7869813484467	72.7870254543323	42.8160294606939
87.8799382066758	87.8914724512956	87.7767727457708	87.4961120827916	86.963570711764	86.0058570543844	84.2552635150876	80.8162221557166	72.8310327386099	42.9244224775047
87.8938873852566	87.9056096278317	87.7914491589544	87.5117291955536	86.9806483200007	86.0251731731149	84.2781876092858	80.8456743163289	72.875348898381	43.0334949174952
87.9079511743661	87.9198620204276	87.8062433385523	87.5274689831088	86.9978568018461	86.0446335886913	84.30127882572	80.8753362003506	72.9199713113627	43.1432389416762
87.9221288622969	87.9342289079877	87.8211545355178	87.5433306464479	87.0151952784223	86.0642372951828	84.3245359447627	80.9052061832667	72.9648973681499	43.2536467451243
87.9364197399916	87.9487095721096	87.8361820036226	87.5593133895951	87.0326628742042	86.083983290472	84.3479577512969	80.935282646187	73.0101244712659	43.3647105587944
87.9508231010378	87.9633032970794	87.8513249994508	87.5754164196023	87.0502587170121	86.1038705762457	84.3715430346985	80.9655639759821	73.0556500345076	43.4764226508475
87.9653382416625	87.9780093698658	87.8665827823939	87.5916389465423	87.0679819380041	86.1238981579837	84.3952905888236	80.9960485653714	73.1014714824967	43.588775327636
87.979964460727	87.9928270801156	87.8819546146452	87.6079801835026	87.0858316716679	86.1440650449497	84.4191992120005	81.0267348129784	73.1475862503714	43.701760934451
87.9947010597221	88.0077557201483	87.897439761194	87.6244393465788	87.1038070558133	86.1643702501803	84.4432677070238	81.057621123363	73.1939917835771	43.8153718560986
88.0095473427622	88.0227945849507	87.9130374898203	87.6410156548687	87.1219072315643	86.1848127904754	84.4674948811493	81.0887059070406	73.2406855377249	43.929600517356
88.0245026165804	88.0379429721716	87.928747071089	87.6577083304648	87.1401313433506	86.2053916863881	84.4918795460901	81.1199875804904	73.2876649784968	44.04443938334
88.0395661905233	88.0532001821168	87.9445677783444	87.6745165984486	87.1584785389003	86.2261059622157	84.516420518012	81.1514645661576	73.3349275815841	44.1598809598124
88.0547373765451	88.0685655177434	87.960498887704	87.6914396868834	87.1769479692311	86.2469546459895	84.5411166175295	81.1831352924516	73.3824708326473	44.2759177934382
88.0700154892032	88.0840382846548	87.9765396780533	87.7084768268079	87.1955387886427	86.2679367694659	84.565966669701	81.2149981937418	73.4302922272926	44.3925424720086
88.0853998456517	88.0996177910947	87.9926894310395	87.7256272522294	87.2142501547082	86.2890513681175	84.590969504024	81.2470517103514	73.4783892710581	44.5097476246365
88.100889765637	88.1153033479423	88.0089474310662	87.7428902001167	87.2330812282662	86.3102974811235	84.6161239544295	81.2792942885506	73.5267594794073	44.6275259219304
88.1164032135773	88.1310120979538	88.0252281623664	87.7601752769151	87.2519337127762	86.3315642623162	84.6412984763753	81.3115566523011	73.5751481585631	44.7452577084215
88.1320213498926	88.1468260112774	88.0416162192185	87.7775718940744	87.2709048266528	86.3529613277175	84.6666231296677	81.3440061172552	73.6238069138141	44.8635533980312
88.1477435000247	88.1627444046126	88.0581108921424	87.7950792951738	87.289993738069	86.3744877249228	84.6920967586173	81.3766411446854	73.6727332714525	44.9824057799279
88.1635689919925	88.1787665972782	88.0747114743965	87.812696726734	87.3091996184395	86.396142505214	84.7177182119803	81.4094602010661	73.7219247711473	45.1018076796463
88.1794971563862	88.1948919112062	88.0914172619719	87.8304234382099	87.3285216424118	86.4179247235514	84.7434863429208	81.442461758314	73.7713789649013	45.2217519608734
88.1955273263621	88.2111196709368	88.1082275535863	87.8482586819834	87.3479589878589	86.4398334385645	84.7694000089861	81.475644293949	73.8210934163311	45.342231526717
88.2116588376365	88.2274492036121	88.1251416506775	87.8662017133571	87.3675108358703	86.4618677125419	84.7954580720893	81.5090062912004	73.8710657001692	45.4632393206114
88.2278910284806	88.243879838971	88.1421588573975	87.8842517905464	87.3871763707446	86.4840266114219	84.8216593984971	81.5425462390759	73.9212934019209	45.5847683269692
88.2442232397144	88.260410909343	88.1592784806065	87.9024081746731	87.4069547799806	86.5063092047819	84.8480028588206	81.5762626324059	73.9717741176278	45.706811571655
88.2606548147015	88.277041749643	88.1764998298663	87.9206701297577	87.4268452542693	86.5287145658287	84.8744873280087	81.6101539718696	74.0225054537062	45.8293621223322
88.2771850993432	88.2937716973649	88.1938222174342	87.9390369227127	87.4468469874856	86.5512417713888	84.9011116853421	81.6442187640104	74.0734850268354	45.9524130887203
88.2938134420727	88.3106000925763	88.2112449582567	87.9575078233349	87.4669591766798	86.5738899018979	84.9278748144274	81.6784555212428	74.1247104638828	46.0759576227871
88.3105391938495	88.3275262779126	88.2287673699633	87.9760821042988	87.4871810220691	86.5966580413922	84.9547756031925	81.7128627618548	74.1761794018523	46.1999889188939
88.327361708154	88.3445495985708	88.2463887728597	87.9947590411487	87.5075117270294	86.6195452774984	84.9818129438809	81.7474390100065	74.2278894878504	46.3245002139053
88.344280340981	88.361669402304	88.2641084899221	88.0135379122919	87.5279504980865	86.6425507014247	85.0089857330468	81.7821827957266	74.2798383790632	46.4494847872736
88.3612944508346	88.3788850394154	88.2819258467901	88.0324179989908	87.5484965449077	86.6656734079516	85.0362928715491	81.8170926549078	74.3320237427419	46.574935961102
88.3744840550746	88.392230280035	88.2957363605182	88.0470505576074	87.5644181204017	86.6835891558727	85.0574478030513	81.8441336710501	74.3724396472048	46.6720588467534
88.3876650490563	88.4055663974453	88.3095365823954	88.0616708844708	87.5803245467414	86.701485476825	85.078576848995	81.8711379811257	74.4127949426249	46.7130390689306
88.4008376355565	88.4188936685814	88.323326926079	88.0762795959955	87.5962167040368	86.7193635493069	85.0996814396704	81.8981069687043	74.4507005596168	46.7266623882539
88.4140018072422	88.4322120858331	88.3371073838647	88.0908766848667	87.6120945863353	86.7372233706034	85.1207615801455	81.9249537755039	74.4853610648354	46.7201637491988
88.427157556778	88.4455216416009	88.3508779480682	88.1054621438022	87.6279581877353	86.7550649381005	85.1418146472312	81.951570370923	74.5164051665403	46.6985402355939
88.4403048768269	88.4588223282961	88.3646386110257	88.1200359655519	87.6438075023869	86.7728881797223	85.1628349232072	81.9778447593197	74.5437239055652	46.665282538771
88.4534437600503	88.4721141383402	88.3783893650931	88.1345981428989	87.6596425228093	86.7906928758186	85.1838136788846	82.0036707476521	74.5673660043053	46.6228620326755
88.4665741991088	88.4853970641658	88.3921302026473	88.14914866862	87.6754632363974	86.8084785874644	85.2047395442734	82.0289530375028	74.587470695302	46.5730559207628
88.4796961866625	88.4986710982163	88.4058611160843	88.1636875353688	87.6912696203587	86.8262445983901	85.2255990065418	82.0536094335448	74.6042250580301	46.517164936575
88.4928097153714	88.511936232946	88.4195820978164	88.1782147354464	87.7070616354827	86.8439898731279	85.2463769400122	82.0775713227382	74.6178373242082	46.4561596365174
88.505914777896	88.5251924608199	88.4332931402636	88.1927302604387	87.7228392191886	86.861713031311	85.2670571142464	82.1007831611721	74.6285205378693	46.3907791503081
88.5190113668973	88.5384397743139	88.4469942358367	88.2072341007088	87.7386022782737	86.8794123366472	85.2876226521374	82.1232014332649	74.636482886678	46.3215982108169
88.5320994750375	88.5516781659137	88.46068537691	88.2217262447436	87.7543506817285	86.897085698437	85.3080564258018	82.1447933713286	74.6419222933085	46.2490729646508
88.5451790949803	88.5649076281139	88.4743665557798	88.2362066783633	87.7700842539159	86.9147306833089	85.328341387525	82.1655356094785	74.6450236935137	46.1735725427293
88.5582502193911	88.5781281534155	88.4880377646065	88.2506753838062	87.7858027683425	86.9323445349049	85.3484608383856	82.1854128729048	74.6459579785116	46.0954010364692
88.571312840937	88.5913397343225	88.5016989953375	88.2651323387086	87.801505942182	86.949924199449	85.3683986400032	82.2044167573519	74.6448819410974	46.0148129776553
88.5843669522871	88.6045423633364	88.5153502396107	88.2795775150014	87.8171934316563	86.9674663553911	85.3881393760864	82.2225446249026	74.6419388019252	45.9320243928289
88.5974125461124	88.6177360329486	88.5289914886355	88.2940108777456	87.8328648283306	86.9849674455981	85.4076684707565	82.2397986246706	74.6372590472751	45.8472208203655
88.610449615085	88.6309207356303	88.5426227330519	88.3084323839306	87.8485196563382	87.0024237108306	85.426972270368	82.2561848367351	74.630961410425	45.7605632241339
88.6234781518777	88.6440964638193	88.5562439627683	88.3228419812579	87.8641573705229	87.0198312234935	85.4460380950188	82.2717125319644	74.6231538940352	45.6721924348108
88.6364981491623	88.6572632099029	88.5698551667764	88.3372396069312	87.8797773554599	87.0371859208652	85.4648542652761	82.2863935375524	74.6139347729486	45.5822325476584
88.6495095996083	88.6704209661973	88.5834563329466	88.351625186473	87.8953789253031	87.0544836371995	85.483410108947	82.3002416970319	74.6033935435718	45.4907935701037
88.66251249588	88.6835697249226	88.5970474478037	88.3659986325845	87.9109613243904	87.0717201342552	85.5016959520424	82.3132724135027	74.5916118028319	45.3979735214421
88.6755068306334	88.6967094781728	88.6106284962848	88.3803598440652	87.9265237285361	87.088891129937	85.5197030974565	82.325502265381	74.5786640500945	45.3038601255832
88.6884925965116	88.7098402178817	88.6241994614823	88.3947087048035	87.9420652469322	87.1059923248448	85.5374237943127	82.3369486848401	74.5646184116565	45.2085321961234
88.7014697861396	88.7229619357827	88.6377603243727	88.4090450828509	87.9575849245805	87.1230194266121	85.5548512004313	82.3476296901082	74.549537291003	45.1120607846236
88.7144383921175	88.7360746233643	88.6513110635352	88.4233688295863	87.9730817451791	87.1399681719843	85.5719793399376	82.3575636637983	74.5334779499104	45.0145101434438
88.7273984070125	88.7491782718196	88.6648516548616	88.4376797789783	87.9885546343881	87.1568343466451	85.5888030576573	82.3667691704218	74.5164930263228	44.9159385409465
88.7403498233493	88.7622728719909	88.6783820712592	88.4519777469492	88.0040024634054	87.1736138028344	85.6053179716307	82.3752648071333	74.4986309951458	44.8163989573783
88.7532926335987	88.7753584143086	88.691902282352	88.4662625308429	88.0194240527855	87.1903024748391	85.6215204248071	82.3830690825713	74.4799365779397	44.7159396830058
88.7662268301644	88.7884348887253	88.705412254179	88.4805339089992	88.0348181764398	87.2068963924551	85.6374074367615	82.390200319383	74.4604511071359	44.6146048352259
88.7791524053681	88.8015022846442	88.7189119488947	88.4947916404317	88.0501835657655	87.2233916925371	85.652976656084	82.3966765766546	74.4402128499379	44.5124348078286
88.7920693514325	88.8145605908435	88.732401324473	88.5090354646111	88.0655189138498	87.2397846287598	85.6682263139436	82.402515589029	74.4192572965734	44.409466662954
88.8049776604616	88.8276097953956	88.7458803344171	88.5232651013478	88.0808228797073	87.2560715797237	85.6831551791959	82.407734719765	74.3976174170719	44.3057344742973
88.8178773244196	88.8406498855818	88.7593489274766	88.5374802507724	88.0960940925086	87.2722490555336	85.6977625153051	82.4123509254131	74.3753238902746	44.2012696285868
88.830768335107	88.8536808478039	88.7728070473746	88.5516805934097	88.1113311557687	87.288313702985	85.7120480392633	82.4163807301334	74.3524053083536	44.0961010911614
88.8436506841341	88.866702667491	88.786254632546	88.5658657903407	88.1265326514621	87.3042623094822	85.7260118826227	82.4198402079874	74.3288883597237	43.9902556405332
88.8565243628928	88.8797153290041	88.7996916158884	88.5800354834477	88.1416971440416	87.3200918058146	85.7396545547044	82.4227449717927	74.3047979928807	43.8837580760519
88.8693893625254	88.8927188155373	88.8131179245278	88.594189295737	88.1568231843384	87.3357992679061	85.7529769079995	82.425110167355	74.2801575633916	43.7766314021701
88.882245673891	88.9057131090167	88.8265334795988	88.6083268317332	88.1719093133257	87.3513819176508	85.7659801057513	82.4269504720748	74.2549889659842	43.6688969922969
88.8950932875296	88.9186981899974	88.8399381960415	88.6224476779395	88.1869540657336	87.3668371229373	85.7786655916739	82.428280097089	74.2293127534456	43.5605747347984
88.9079321936236	88.9316740375592	88.8533319824157	88.6365514033573	88.2019559735004	87.3821623969601	85.7910350617507	82.4291127922452	74.2031482438268	43.4516831633523
88.9207623819571	88.9446406292008	88.8667147407326	88.65063756006	88.2169135690563	87.3973553969076	85.8030904380352	82.4294618533157	74.1765136172685	43.3422395735567
88.9335838418729	88.9575979407339	88.8800863663048	88.664705683815	88.2318253884303	87.4124139221089	85.8148338443713	82.4293401309617	74.1494260035984	43.2322601274435
88.946396562227	88.9705459461767	88.8934467476152	88.6787552947463	88.2466899741781	87.427335911716	85.8262675839412	82.4287600410373	74.1219015617145	43.1217599473248
88.9592005313406	88.9834846176479	88.9067957662047	88.6927858980358	88.261505878129	87.442119441991	85.8373941185443	82.4277335758925	74.0939555516444	43.0107532002176
88.9719957369512	88.9964139252615	88.9201332965786	88.7067969846537	88.2762716639509	87.4567627232602	85.8482160495127	82.4262723163946	74.0656024000627	42.8992531739291
88.9847821661602	89.0093338370228	88.9334592061317	88.7207880321159	88.2909859095358	87.4712640965929	85.8587361001627	82.4243874444362	74.0368557599578	42.7872723457514
88.9975598053796	89.0222443187254	88.9467733550935	88.7347585052626	88.3056472092069	87.4856220302558	85.8689570996887	82.4220897557385	74.0077285650586	42.6748224445912
89.0103286402768	89.0351453338507	88.9600755964898	88.7487078570519	88.3202541757518	87.4998351159886	85.8788819684042	82.4193896727962	73.9782330795559	42.5619145072604
89.0230886557174	89.0480368434696	88.9733657761245	88.762635529367	88.3348054422853	87.5139020651437	85.8885137042402	82.4162972578378	73.9483809435988	42.4485589295645
89.0358398357071	89.0609188061465	88.9866437325775	88.7765409538302	88.3492996639478	87.5278217047233	85.8978553704127	82.4128222256993	73.9181832149846	42.3347655127465
89.0485821633315	89.0737911778464	88.9999092972213	88.7904235526212	88.3637355194436	87.5415929733501	85.9069100841755	82.4089739565327	73.8876504074182	42.220543505779
89.0613156206959	89.0866539118453	89.013162294253	88.8042827392959	88.378111712426	87.5552149171964	85.9156810065806	82.4047615082843	73.8567925256735	42.1059016439387
89.0740401888629	89.0995069586443	89.0264025407432	88.8181179196027	88.3924269727354	87.5686866859	85.9241713331694	82.4001936288957	73.8256190979528	41.9908481840446
89.0867558477899	89.112350265887	89.0396298467004	88.8319284922924	88.4066800574966	87.5820075284858	85.9323842855246	82.3952787681886	73.7941392057069	41.8753909367007
89.0994625762657	89.1251837782812	89.0528440151493	88.8457138499206	88.4208697520825	87.5951767893143	85.9403231036164	82.3900250894082	73.7623615111531	41.7595372958405
89.1121603518467	89.1380074375246	89.066044842224	88.8594733796383	88.4349948709506	87.6081939040723	85.9479910388801	82.3844404804053	73.730294282701	41.6432942658406
89.1248491507927	89.1508211822352	89.0792321172742	88.87320646397	88.4490542583595	87.6210583958186	85.9553913479678	82.378532564444	73.6979454184733	41.5266684864397
89.1375289480028	89.1636249478859	89.0924056229834	88.8869124815763	88.4630467889715	87.6337698710994	85.9625272871185	82.3723087106307	73.6653224680927	41.4096662556717
89.1501997169509	89.176418666744	89.1055651354997	88.9005908080005	88.4769713683491	87.6463280161401	85.9694021070973	82.3657760439586	73.6324326528855	41.2922935510013
89.1628614296217	89.1892022678151	89.1187104245768	88.9142408163955	88.4908269333511	87.658732593124	85.976019048656	82.358941454972	73.5992828846381	41.1745560488285
89.1755140564469	89.2019756767923	89.1318412537257	88.9278618782324	88.5046124524351	87.6709834365631	85.9823813384721	82.3518116090518	73.5658797830301	41.0564591425114
89.1881575662426	89.2147388160102	89.1449573803748	88.9414533639876	88.5183269258724	87.6830804497668	85.9884921855249	82.3443929553304	73.5322296918548	40.9380079590405
89.200791926146	89.2274916044036	89.1580585560403	88.9550146438085	88.5319693858821	87.6950236014132	85.9943547778732	82.336691735243	73.4983386941268	40.8192073744854
89.2134171015546	89.2402339574715	89.1711445265024	88.9685450881564	88.5455388966892	87.7068129222245	85.9999722797975	82.328713990724	73.4642126261677	40.7000620283194
89.226033056065	89.2529657872461	89.1842150319904	88.9820440684266	88.5590345545135	87.7184485017504	86.0053478292779	82.3204655720604	73.4298570907518	40.5805763367208
89.238639751414	89.2656870022668	89.1972698073724	88.9955109575446	88.5724554874936	87.7299304852592	86.0104845357763	82.3119521454119	73.3952774693866	40.4607545049365
89.2512371474198	89.2783975075589	89.2103085823523	89.0089451305385	88.5858008555522	87.7412590707383	86.0153854782962	82.303179200009	73.3604789337956	40.3406005387872
89.263825201926	89.2910972046177	89.2233310816706	89.0223459650873	88.5990698502069	87.7524345060032	86.0200537036968	82.2941520550423	73.3254664566644	40.2201182553844
89.2764038707459	89.3037859913972	89.2363370253097	89.0357128420445	88.6122616943316	87.7634570859152	86.0244922252361	82.284875866253	73.290244821707	40.0993112931241
89.2889731076092	89.3164637623036	89.2493261287028	89.0490451459378	88.6253756418726	87.7743271497059	86.0287040213247	82.2753556322375	73.2548186331031	39.9781831210147
89.3015328641103	89.329130408194	89.2622981029461	89.0623422654446	88.6384109775246	87.7850450784083	86.032692034469	82.2655962004775	73.2191923243527	39.8567370473922
89.3140830896587	89.3417858163791	89.2752526550126	89.0756035938426	88.6513670163688	87.7956112923909	86.036459170387	82.2556022731078	73.1833701665908	39.7349762280704
89.3266237314308	89.3544298706309	89.2881894879687	89.0888285294378	88.6642431034789	87.8060262489953	86.040008297281	82.2453784124315	73.1473562764025	39.612903673969
89.3391547343246	89.367062451195	89.301108301191	89.1020164759676	88.6770386134966	87.8162904402719	86.0433422452512	82.2349290461957	73.1111546231712	39.4905222582606
89.3516760409159	89.3796834348068	89.3140087905844	89.1151668429819	88.6897529501823	87.8264043908144	86.0464638058376	82.2242584726368	73.0747690359968	39.3678347230717
89.3641875914171	89.392292694712	89.3268906488005	89.1282790462004	88.702385545941	87.8363686556888	86.0493757316775	82.2133708653065	73.0382032102104	39.2448436857707
89.3766893236385	89.4048901006918	89.3397535654553	89.1413525078484	88.7149358613296	87.8461838184538	86.0520807362671	82.202270277688	73.0014607135158	39.1215516448738
89.3891811729512	89.4174755190913	89.3525972273468	89.1543866569698	88.7274033845454	87.8558504892713	86.0545814938168	82.190960647613	72.964544991781	38.9979609855954
89.4016630722536	89.430048812852	89.3654213186708	89.16738092972	88.7397876309009	87.8653693031035	86.056880639191	82.1794458014874	72.9274593745062	38.8740739850694
89.4141349519394	89.442609841548	89.378225521236	89.1803347696366	88.7520881422851	87.8747409179929	86.0589807679236	82.1677294583354	72.8902070799865	38.749892817264
89.4265967398686	89.4551584614261	89.3910095146766	89.1932476278912	88.7643044866147	87.883966013424	86.0608844363006	82.1558152336702	72.8527912201919	38.6254195576107
89.439048361341	89.4676945254483	89.4037729766628	89.2061189635208	88.7764362572774	87.8930452887623	86.0625941615041	82.1437066432001	72.8152148053823	38.500656187369
89.4514897390723	89.4802178833384	89.4165155831095	89.2189482436402	88.7884830725679	87.9019794617686	86.0641124218096	82.1314071063758	72.7774807484739	38.3756045977422
89.4639207931727	89.4927283816318	89.4292370083814	89.2317349436369	88.8004445751201	87.9107692671855	86.0654416568313	82.1189199497893	72.7395918691742	38.2502665937638
89.4763414411282	89.505225863727	89.4419369254954	89.2444785473469	88.8123204313352	87.9194154553935	86.06658426781	82.1062484104283	72.7015508978981	38.124643897967
89.4887515977847	89.5177101699416	89.4546150063197	89.257178547215	88.8241103308086	87.9279187911336	86.0675426179383	82.0933956387949	72.6633604794817	37.998738153854
89.5011511753346	89.5301811375689	89.4672709217696	89.2698344444368	88.8358139857567	87.9362800522941	86.0683190327185	82.0803647018945	72.6250231767037	37.8725509291763
89.5135400833056	89.5426386009393	89.4799043419992	89.2824457490866	88.8474311304437	87.9445000287582	86.0689158003502	82.0671585861004	72.5865414736272	37.7460837190389
89.5259182285531	89.5550823914815	89.4925149365897	89.2950119802292	88.8589615206115	87.9525795213116	86.0693351721416	82.0537801999008	72.5479177787729	37.6193379488398
89.5382855152543	89.5675123377882	89.5051023747332	89.3075326660172	88.8704049329113	87.9605193406053	86.0695793629433	82.0402323765326	72.5091544281338	37.4923149770544
89.5506418449054	89.5799282656817	89.5176663254129	89.3200073437745	88.8817611643405	87.9683203061729	86.0696505516008	82.0265178765084	72.4702536880406	37.3650160978753
89.5629871163213	89.5923299982829	89.5302064575785	89.3324355600663	88.8930300316831	87.9759832454989	86.0695508814223	82.012639390041	72.4312177578861	37.2374425437159
89.5753212256373	89.6047173560815	89.5427224403174	89.3448168707571	88.9042113709563	87.9835089931374	86.0692824606596	81.9985995393701	72.3920487727182	37.109595487586
89.5876440663142	89.6170901570073	89.5552139430217	89.3571508410552	88.9153050368628	87.9908983898762	86.0688473630007	81.9844008809958	72.3527488057076	36.9814760453475
89.5999555291453	89.6294482165034	89.56768063555	89.3694370455471	88.9263109022506	87.9981522819475	86.0682476280702	81.9700459078236	72.3133198704982	36.8530852778575
89.612255502266	89.6417913476011	89.5801221883855	89.38167506822	88.9372288575788	88.0052715202803	86.0674852619378	81.9555370512241	72.2737639234467	36.7244241930044
89.6245438711653	89.6541193609947	89.5925382727884	89.3938645024741	88.9480588103923	88.0122569597945	86.0665622376311	81.940876683012	72.2340828657571	36.5954937476446
89.6368205187007	89.6664320651186	89.6049285609447	89.4060049511254	88.9588006848043	88.0191094587335	86.0654804956526	81.9260671173476	72.1942785455172	36.4662948494451
89.6490853251142	89.6787292662245	89.6172927261093	89.4180960263986	88.9694544209867	88.0258298780339	86.0642419444992	81.911110612565	72.1543527596409	36.3368283586367
89.6613381680513	89.6910107684597	89.629630442745	89.4301373499115	88.9800199746699	88.0324190807318	86.0628484611829	81.896009372929	72.1143072557225	36.207095089684
89.6735789225819	89.7032763739462	89.6419413866568	89.4421285526509	88.9904973166517	88.038877931401	86.0613018917508	81.8807655503252	72.0741437338073	36.077095812876
89.6858074612233	89.7155258828598	89.6542252351209	89.4540692749408	89.0008864323151	88.0452072956249	86.0596040518053	81.8653812458853	72.0338638480837	35.9468312558425
89.6980236539653	89.7277590935101	89.6664816670096	89.4659591664031	89.0111873211555	88.0514080394983	86.0577567270214	81.8498585115516	71.9934692084998	35.8163021049997
89.7102273682972	89.7399758024207	89.6787103629113	89.4777978859116	89.0213999963178	88.0574810291583	86.0557616736626	81.8341993515817	71.9529613823095	35.6855090069294
89.7224184692372	89.7521758044094	89.6909110052461	89.4895851015387	89.0315244841429	88.0634271303433	86.0536206190919	81.8184057239975	71.9123418955508	35.5544525696951
89.7345968193626	89.7643588926689	89.7030832783759	89.5013204904974	89.0415608237241	88.0692472079775	86.0513352622805	81.8024795419806	71.8716122344614	35.4231333640982
89.7467622788432	89.7765248588474	89.7152268687118	89.513003739076	89.0515090664731	88.0749421257818	86.0489072743108	81.7864226752156	71.8307738468329	35.2915519248788
89.7589147054752	89.7886734931287	89.7273414648146	89.524634542569	89.0613692756962	88.0805127459069	86.0463382988755	81.7702369511845	71.789828143308	35.1597087518617
89.7710539547174	89.8008045843128	89.739426757493	89.536212605202	89.0711415261797	88.0859599285902	86.0436299527702	81.7539241564141	71.7487764986234	35.0276043110532
89.7831798797287	89.8129179198959	89.7514824398961	89.5477376400525	89.0808259037857	88.0912845318339	86.0407838263811	81.7374860376776	71.7076202528004	34.8952390356884
89.7952923314078	89.82501328615	89.7635082076022	89.5592093689664	89.0904225050572	88.0964874111031	86.0378014841665	81.7209243031538	71.6663607122868	34.7626133272345
89.8073911584332	89.8370904682023	89.7755037587032	89.5706275224709	89.0999314368335	88.1015694190434	86.0346844651317	81.7042406235444	71.624999151052	34.62972755635
89.8194762073054	89.8491492501142	89.7874687938847	89.5819918396828	89.1093528158741	88.1065314052176	86.0314342832976	81.6874366331512	71.5835368116373	34.4965820638028
89.8315473223905	89.8611894149595	89.7994030165023	89.5933020682152	89.1186867684935	88.1113742158587	86.0280524281625	81.6705139309164	71.5419749061642	34.3631771613505
89.8436043459644	89.8732107449019	89.8113061326537	89.6045579640794	89.1279334302045	88.1160986936407	86.0245403651569	81.6534740814251	71.500314617302	34.229513132582
89.8556471182587	89.8852130212729	89.8231778512468	89.6157592915857	89.1370929453711	88.1207056774636	86.0208995360914	81.6363186158741	71.4585570991978	34.0955902337258
89.8676754775075	89.897196024647	89.8350178840643	89.6269058232402	89.1461654668705	88.1251960022549	86.0171313595975	81.6190490330059	71.4167034783688	33.9614086944232
89.8796892599955	89.9091595349184	89.8468259458243	89.6379973396408	89.1551511557644	88.1295704987841	86.0132372315611	81.6016668000117	71.3747548545611	33.8269687184712
89.8916883001065	89.9211033313749	89.8586017542373	89.6490336293703	89.1640501809793	88.1338299934912	86.0092185255485	81.5841733534025	71.3327123015739	33.6922704845337
89.9036724303734	89.9330271927724	89.8703450300594	89.6600144888882	89.1728627189952	88.1379753083272	86.0050765932258	81.5665700998515	71.290576868053	33.5573141468253
89.9156414815286	89.9449308974076	89.8820554971426	89.6709397224204	89.181588953543	88.1420072606077	86.0008127647703	81.5488584170075	71.248349578254	33.4220998357665
89.9275952825556	89.9568142231901	89.8937328824809	89.6818091418486	89.1902290753111	88.1459266628768	85.9964283492747	81.5310396542808	71.2060314327758	33.2866276586137
89.939533660741	89.9686769477133	89.9053769162541	89.6926225665975	89.1987832816592	88.1497343227825	85.9919246351444	81.5131151336035	71.1636234092677	33.1508977000634
89.9514564417271	89.980518848325	89.9169873318675	89.7033798235217	89.2072517763415	88.1534310429618	85.9873028904873	81.4950861501641	71.1211264631093	33.0149100228334
89.9633634495652	89.9923397021956	89.9285638659887	89.7140807467913	89.2156347692368	88.1570176209361	85.9825643634959	81.4769539731179	71.0785415280658	32.8786646682209
89.9752545067697	90.0041392863864	89.9401062585819	89.7247251777774	89.2239324760874	88.1604948490151	85.9777102828234	81.4587198462747	71.0358695169188	32.7421616566391
89.987129434372	90.0159173779165	89.9516142529384	89.7353129649369	89.2321451182449	88.1638635142096	85.9727418579513	81.4403849887629	70.9931113220743	32.6054009881335
89.9989880519753	90.0276737538282	89.9630875957053	89.7458439636969	89.2402729224246	88.167124398153	85.9676602795508	81.4219505956737	70.9502678161492	32.4683826428778
90.0108301778099	90.0394081912515	89.9745260369101	89.7563180363389	89.2483161204655	88.1702782770293	85.962466719837	81.4034178386832	70.907339852536	32.3311065816513
90.022655628788	90.0511204674673	89.9859293299842	89.7667350518831	89.2562749490996	88.1733259215098	85.9571623329162	81.3847878666551	70.8643282659474	32.1935727462989
90.03446422056	90.0628103599701	89.9972972317824	89.7770948859726	89.2641496497266	88.1762680966958	85.9517482551265	81.3660618062247	70.8212338729427	32.0557810601729
90.0462557675693	90.0744776465281	90.0086295026007	89.7873974207578	89.2719404681965	88.1791055620682	85.9462256053713	81.3472407623635	70.7780574724342	31.917731428559
90.058030083109	90.0861221052433	90.0199259061918	89.7976425447813	89.2796476545979	88.1818390714433	85.9405954854464	81.3283258189271	70.7347998461773	31.7794237390866
90.0697869793772	90.0977435146101	90.0311862097775	89.8078301528626	89.287271463054	88.1844693729339	85.9348589803607	81.3093180391852	70.6914617592423	31.6408578621235
90.0815262675335	90.1093416535721	90.0424101840596	89.8179601459843	89.2948121515241	88.1869972089168	85.9290171586503	81.2902184663351	70.6480439604715	31.5020336511571
90.0932477577548	90.1209163015785	90.0535976032286	89.8280324311773	89.3022699816115	88.1894233160048	85.9230710726863	81.2710281240005	70.6045471829191	31.3629509431608
90.1049512592909	90.1324672386383	90.0647482449694	89.8380469214082	89.309645218378	88.1917484250237	85.917021758976	81.2517480167134	70.5609721442777	31.2236095589482
90.1166365805208	90.1439942453741	90.0758618904666	89.8480035354667	89.3169381301632	88.1939732609939	85.9108702384588	81.2323791303824	70.5173195472891	31.0840093035138
90.1283035290078	90.1554971030744	90.0869383244062	89.8579021978534	89.3241489884109	88.1960985431167	85.9046175167952	81.2129224327465	70.4735900801423	30.9441499663619
90.1399519115557	90.1669755937442	90.0979773349768	89.8677428386693	89.3312780675	88.1981249847642	85.8982645846503	81.1933788738151	70.4297844168578	30.8040313218245
90.1515815342631	90.1784295001545	90.1089787138681	89.8775253935054	89.3383256445814	88.2000532934734	85.8918124179715	81.1737493862949	70.3859032176594	30.6636531293667
90.1631922025793	90.1898586058916	90.119942256268	89.8872498033338	89.3452919994198	88.2018841709434	85.8852619782603	81.1540348860041	70.3419471293339	30.5230151338827
90.1747837213585	90.201262695403	90.1308677608585	89.8969160143998	89.3521774142414	88.2036183130368	85.8786142128389	81.1342362722743	70.2979167855788	30.382117065981
90.186355894914	90.2126415540445	90.1417550298092	89.9065239781143	89.3589821735858	88.2052564097838	85.8718700551105	81.1143544283404	70.2538128073389	30.2409586422595
90.1979085270724	90.2239949681238	90.1526038687701	89.9160736509485	89.3657065641631	88.2067991453891	85.8650304248153	81.0943902217195	70.2096358031324	30.0995395655719
90.2094414212274	90.2353227249448	90.1634140868625	89.9255649943287	89.3723508747159	88.208247198242	85.8580962282801	81.0743445045784	70.1653863693657	29.9578595252842
90.2209543803924	90.2466246128491	90.1741854966686	89.9349979745327	89.3789153958857	88.2096012409293	85.8510683586638	81.0542181140904	70.1210650906397	29.8159181975228
90.2324472072537	90.2579004212573	90.1849179142198	89.9443725625874	89.3854004200838	88.2108619402498	85.8439476961969	81.0340118727821	70.0766725400448	29.6737152454146
90.243919704222	90.2691499407087	90.195611158984	89.9536887341677	89.3918062413664	88.2120299572324	85.8367351084164	81.0137265888699	70.0322092794476	29.5312503193185
90.2553716734851	90.2803729628998	90.2062650538515	89.9629464694963	89.3981331553145	88.213105947155	85.8294314503962	80.9933630565876	69.9876758597689	29.3885230570492
90.2668029170579	90.2915692807216	90.2168794251197	89.9721457532451	89.4043814589174	88.2140905595668	85.822037564972	80.9729220565037	69.9430728212524	29.2455330840939
90.2782132368339	90.3027386882958	90.2274541024768	89.9812865744379	89.4105514504599	88.2149844383111	85.8145542829623	80.9524043558308	69.8984006937254	29.1022800138215
90.2896024346347	90.3138809810099	90.2379889189849	89.990368926354	89.4166434294143	88.215788221551	85.806982423384	80.9318107087253	69.8536599968518	28.9587634476849
90.3009703122593	90.3249959555506	90.2484837110609	89.9993928064338	89.4226576963352	88.2165025417963	85.7993227936641	80.9111418565798	69.8088512403772	28.814982975417
90.3123166715332	90.3360834099371	90.2589383184585	90.0083582161851	89.4285945527588	88.2171280259316	85.7915761898473	80.8903985283066	69.7639749243667	28.6709381752195
90.3236413143564	90.3471431435523	90.2693525842472	90.0172651610911	89.4344543011045	88.2176652952464	85.7837433967981	80.8695814406138	69.7190315394353	28.5266286139464
90.3349440427506	90.3581749571731	90.2797263547919	90.0261136505197	89.4402372445818	88.2181149654663	85.7758251884004	80.8486912982736	69.6740215669723	28.3820538472811
90.3462246589062	90.3691786530002	90.2900594797312	90.0349036976338	89.4459436870985	88.2184776467849	85.7678223277514	80.8277287943831	69.6289454793575	28.2372134199074
90.3574829652283	90.3801540346858	90.3003518119553	90.0436353193038	89.4515739331735	88.2187539438981	85.7597355673523	80.806694610619	69.5838037401727	28.0921068656757
90.3687187643824	90.3911009073612	90.3106032075825	90.0523085360204	89.4571282878524	88.218944456038	85.7515656492955	80.7855894174839	69.538596804406	27.9467337077633
90.3799318593382	90.4020190776627	90.3208135259362	90.0609233718099	89.4626070566257	88.2190497770084	85.7433133054467	80.7644138745475	69.4933251186508	27.8010934588294
90.3911220534146	90.4129083537568	90.3309826295199	90.0694798541496	89.4680105453505	88.2190704952216	85.7349792576243	80.7431686306801	69.447989121298	27.6551856211656
90.402289150322	90.4237685453642	90.341110383993	90.0779780138859	89.4733390601749	88.2190071937353	85.7265642177749	80.7218543242808	69.4025892427243	27.5090096868408
90.4134329542051	90.4345994637829	90.3511966581453	90.0864178851524	89.4785929074647	88.2188604502905	85.7180688881448	80.7004715834994	69.3571259054734	27.3625651378423
90.4245532696848	90.44540092191	90.3612413238712	90.0947995052909	89.4837723937338	88.21863083735	85.7094939614486	80.6790210264518	69.3115995244335	27.2158514462112
90.4356499018984	90.4561727342634	90.3712442561432	90.1031229147719	89.4888778255759	88.2183189221378	85.7008401210335	80.6575032614314	69.2660105070088	27.0688680741746
90.4467226565405	90.4669147170012	90.3812053329855	90.1113881571186	89.4939095096	88.2179252666786	85.6921080410416	80.6359188871128	69.2203592532868	26.9216144742722
90.457771339902	90.4776266879414	90.3911244354471	90.1195952788302	89.4988677523671	88.2174504278383	85.6832983865672	80.6142684927523	69.1746461562004	26.7740900894802
90.4687957589084	90.4883084665799	90.4010014475738	90.1277443293075	89.5037528603305	88.2168949573643	85.6744118138126	80.5925526583818	69.1288716016862	26.6262943533292
90.4797957211581	90.4989598741082	90.4108362563811	90.1358353607804	89.5085651397774	88.2162594019267	85.6654489702394	80.5707719549984	69.0830359688378	26.4782266900204
90.490771034959	90.5095807334292	90.4206287518257	90.1438684282353	89.5133048967731	88.2155443031598	85.6564104947172	80.5489269447492	69.0371396300552	26.3298865145358
90.5017215093647	90.5201708691738	90.4303788267777	90.151843589345	89.5179724371075	88.2147501977034	85.6472970176699	80.527018181111	68.99118295119	26.181273232746
90.5126469542102	90.5307301077146	90.4400863769916	90.1597609043993	89.5225680662436	88.2138776172451	85.6381091612181	80.5050462090657	68.9451662916869	26.0323862415138
90.5235471801461	90.5412582771806	90.4497513010779	90.1676204362369	89.5270920892676	88.2129270885623	85.6288475393191	80.4830115652716	68.8990900047212	25.8832249287943
90.5344219986725	90.55175520747	90.4593735004737	90.1754222501789	89.5315448108414	88.2118991335643	85.6195127579043	80.4609147782296	68.8529544373326	25.7337886737312
90.5452712221723	90.5622207302624	90.4689528794145	90.1831664139632	89.5359265351572	88.2107942693353	85.6101054150132	80.4387563684464	68.8067599305553	25.58407684675
90.5560946639428	90.5726546790303	90.4784893449041	90.1908529976803	89.5402375658932	88.209613008176	85.6006261009254	80.4165368485927	68.7605068195454	25.4340888096477
90.5668921382277	90.5830568890503	90.4879828066856	90.1984820737104	89.5444782061716	88.2083558576473	85.5910753982898	80.3942567236576	68.7141954337037	25.2838239156784
90.5776634602472	90.5934271974123	90.4974331772121	90.2060537166614	89.5486487585184	88.2070233206123	85.5814538822509	80.3719164911	68.6678260967965	25.133281509637
90.5884084462281	90.6037654430296	90.506840371617	90.2135680033083	89.5527495248242	88.2056158952789	85.5717621205729	80.3495166409957	68.6213991270724	24.982460927938
90.5991269134329	90.6140714666466	90.5162043076843	90.2210250125342	89.5567808063074	88.2041340752431	85.5620006737612	80.3270576561805	68.5749148373768	24.8313614986925
90.6098186801875	90.6243451108473	90.5255249058195	90.2284248252714	89.5607429034786	88.2025783495312	85.5521700951819	80.3045400123911	68.5283735352623	24.6799825417806
90.6204835659093	90.6345862200622	90.5348020890191	90.2357675244448	89.5646361161064	88.2009492026422	85.5422709311782	80.2819641784014	68.4817755230981	24.5283233689217
90.6311213911335	90.6447946405747	90.544035782842	90.2430531949158	89.5684607431847	88.1992471145909	85.5323037211852	80.2593306161559	68.4351210981743	24.3763832837409
90.6417319775391	90.6549702205269	90.5532259153789	90.2502819234275	89.5722170829017	88.1974725609497	85.5222689978422	80.2366397809008	68.3884105528061	24.2241615818323
90.6523151479738	90.665112809925	90.5623724172234	90.2574537985507	89.5759054326097	88.1956260128915	85.5121672871027	80.2138921213103	68.3416441744328	24.0716575508193
90.6628707264789	90.6752222606437	90.5714752214419	90.2645689106315	89.5795260887968	88.1937079372313	85.5019991083425	80.1910880796114	68.2948222457167	23.9188704704114
90.6733985383123	90.6852984264302	90.5805342635446	90.2716273517399	89.5830793470596	88.1917187964685	85.4917649744655	80.1682280917054	68.2479450446375	23.7657996124578
90.6838984099717	90.6953411629075	90.5895494814555	90.2786292156187	89.5865655020771	88.1896590488288	85.4814653920074	80.1453125872859	68.2010128445859	23.6124442409977
90.6943701692167	90.7053503275774	90.5985208154835	90.2855745976348	89.589984847586	88.1875291483057	85.4711008612377	80.1223419899549	68.154025914454	23.4588036123074
90.70481364509	90.7153257798223	90.6074482082927	90.2924635947299	89.5933376763567	88.1853295447021	85.4606718762597	80.0993167173359	68.1069845187239	23.3048769749437
90.7152286679383	90.7252673809075	90.6163316048737	90.2992963053738	89.5966242801709	88.1830606836714	85.4501789251081	80.0762371811844	68.0598889175539	23.1506635697839
90.725615069432	90.7351749939818	90.6251709525138	90.3060728295175	89.5998449498001	88.1807230067588	85.4396224898451	80.0531037874954	68.0127393668626	22.9961626300629
90.7359726825846	90.7450484840784	90.6339662007691	90.3127932685481	89.6029999749853	88.1783169514417	85.429003046655	80.0299169366097	67.9655361184111	22.8413733814055
90.746301341771	90.7548877181148	90.6427173014346	90.3194577252438	89.6060896444171	88.1758429511708	85.4183210659361	80.0066770233163	67.9182794198837	22.6862950418559
90.7566008827455	90.764692564893	90.6514242085161	90.3260663037306	89.6091142457177	88.1733014354101	85.4075770123921	79.9833844369536	67.8709695149652	22.5309268219034
90.766871142659	90.7744628950979	90.6600868782018	90.3326191094401	89.6120740654232	88.1706928296768	85.3967713451203	79.9600395615076	67.8236066434182	22.3752679245036
90.7771119600749	90.7841985812966	90.6687052688335	90.339116249067	89.6149693889667	88.1680175555817	85.3859045176995	79.9366427757085	67.7761910411574	22.2193175450959
90.7873231749856	90.7938994979365	90.6772793408785	90.3455578305287	89.617800500663	88.165276030868	85.3749769782752	79.9131944531247	67.7287229403222	22.0630748716169
90.7975046288272	90.8035655213428	90.6858090569019	90.3519439629255	89.6205676836935	88.1624686694512	85.363989169644	79.889694962255	67.6812025693484	21.9065390845094
90.807656164494	90.8131965297163	90.6942943815383	90.3582747565012	89.623271220092	88.1595958814575	85.3529415293358	79.8661446666183	67.633630153037	21.7497093567264
90.8177776263523	90.8227924031302	90.7027352814643	90.3645503226051	89.6259113907317	88.1566580732628	85.3418344896951	79.8425439248422	67.586005912623	21.5925848537312
90.8278688602535	90.8323530235269	90.7111317253712	90.3707707736548	89.6284884753124	88.1536556475312	85.33066847796	79.8188930907486	67.5383300658408	21.4351647334916
90.837929713547	90.8418782747138	90.7194836839373	90.3769362230991	89.6310027523491	88.1505890032527	85.3194439163405	79.7951925134386	67.4906028269895	21.2774481464702
90.8479600350917	90.8513680423595	90.7277911298013	90.3830467853829	89.6334544991604	88.1474585357812	85.3081612220947	79.7714425373741	67.4428244069963	21.119434235608
90.8579596752676	90.860822213989	90.7360540375348	90.3891025759118	89.6358439918588	88.1442646368719	85.2968208076043	79.7476435024595	67.3949950134781	20.9611221363031
90.8679284859862	90.870240678979	90.7442723836164	90.3951037110182	89.6381715053404	88.1410076947185	85.2854230804479	79.7237957441196	67.3471148508023	20.8025109763832
90.8778663207012	90.8796233285526	90.7524461464044	90.4010503079276	89.6404373132762	88.1376880939899	85.273968443474	79.6998995933776	67.2991841201458	20.6435998760723
90.8877730344175	90.8889700557739	90.7605753061112	90.4069424847265	89.6426416881037	88.134306215867	85.2624572948713	79.6759553769303	67.2512030195526	20.4843879479498
90.8976484837005	90.8982807555417	90.768659844777	90.4127803603299	89.6447849010188	88.1308624380785	85.250890028239	79.6519634172224	67.2031717439908	20.3248742969037
90.9074925266845	90.9075553245839	90.7766997462439	90.4185640544503	89.6468672219688	88.1273571349371	85.2392670326551	79.6279240325186	67.1550904854076	20.1650580200755
90.9173050230804	90.9167936614505	90.7846949961305	90.4242936875675	89.6488889196457	88.1237906773749	85.2275886927439	79.6038375369747	67.1069594327836	20.0049382067984
90.9270858341834	90.9259956665073	90.7926455818067	90.4299693808983	89.6508502614799	88.1201634329787	85.2158553887415	79.5797042407073	67.0587787721853	19.8445139385262
90.9368348228796	90.9351612419285	90.800551492368	90.435591256368	89.6527515136347	88.1164757660249	85.2040674965614	79.5555244498613	67.0105486868173	19.6837842887538
90.9465518536521	90.9442902916897	90.8084127186113	90.4411594365813	89.6545929410011	88.1127280375138	85.1922253878578	79.5312984666768	66.9622693570726	19.5227483229289
90.9562367925873	90.9533827215599	90.8162292530098	90.4466740447952	89.6563748071932	88.1089206052045	85.1803294300879	79.5070265895543	66.9139409605825	19.361405098353
90.9658895073798	90.9624384390943	90.8240010896887	90.4521352048913	89.6580973745443	88.1050538236481	85.1683799865741	79.4827091131184	66.8655636722645	19.1997536640726
90.9755098673373	90.9714573536258	90.831728224401	90.4575430413496	89.6597609041026	88.1011280442216	85.1563774165635	79.4583463282807	66.8171376643705	19.037793060759
90.9850977433849	90.9804393762569	90.8394106545038	90.4628976792227	89.6613656556284	88.0971436151615	85.144322075288	79.4339385223006	66.7686631065328	18.8755223205762
90.9946530080693	90.9893844198511	90.8470483789341	90.4681992441102	89.6629118875912	88.093100881596	85.1322143140219	79.4094859788461	66.7201401658094	18.7129404670358
91.0041755355615	90.9982923990244	90.854641398186	90.4734478621341	89.664399857167	88.0890001855785	85.1200544801395	79.3849889780517	66.671569006729	18.5500465148394
91.0136652016606	91.0071632301363	90.8621897142869	90.4786436599151	89.6658298202364	88.084841866119	85.1078429171714	79.360447796577	66.6229497913342	18.3868394697053
91.0231218837955	91.0159968312805	90.8696933307748	90.4837867645485	89.6672020313828	88.0806262592169	85.0955799648592	79.3358627076625	66.5742826792246	18.2233183281808
91.0325454610276	91.0247931222759	90.8771522526755	90.4888773035814	89.6685167438915	88.076353697892	85.0832659592104	79.3112339811855	66.525567827598	18.0594820774376
91.041935814052	91.033552024657	90.8845664864801	90.4939154049907	89.6697742097479	88.0720245122162	85.0709012325515	79.2865618837139	66.476805391292	17.8953296950497
91.0512928251992	91.0422734616643	90.8919360401229	90.4989011971606	89.6709746796378	88.0676390293444	85.0584861135803	79.2618466785599	66.4279955228237	17.7308601487525
91.0606163784355	91.0509573582345	90.8992609229592	90.5038348088614	89.6721184029464	88.063197573545	85.0460209274175	79.237088625832	66.379138372429	17.5660723961814
91.0699063593638	91.0596036409905	90.9065411457437	90.508716369229	89.6732056277583	88.0587004662308	85.0335059956575	79.2122879824859	66.3302340881015	17.4009653845897
91.0791626552234	91.0682122382313	90.9137767206087	90.5135460077442	89.6742366008585	88.0541480259884	85.0209416364178	79.1874450023751	66.2812828156299	17.2355380505423
91.0883851548898	91.0767830799218	90.9209676610432	90.5183238542129	89.675211567732	88.0495405686082	85.0083281643882	79.1625599362997	66.2322846986349	17.0697893195852
91.097573748874	91.0853160976824	90.9281139818716	90.5230500387469	89.6761307725656	88.0448784071142	84.9956658908789	79.1376330320548	66.1832398786058	16.9037181058881
91.1067283293216	91.0938112247783	90.935215699233	90.5277246917446	89.676994458248	88.0401618517925	84.9829551238674	79.1126645344781	66.1341484949358	16.7373233118585
91.1158487900113	91.1022683961093	90.9422728305606	90.5323479438733	89.6778028663723	88.0353912102204	84.9701961680456	79.0876546854957	66.0850106849569	16.5706038277249
91.1249350263531	91.1106875481988	90.9492853945614	90.5369199260503	89.6785562372368	88.030566787295	84.9573893248648	79.062603724168	66.035826583974	16.4035585310874
91.1339869353863	91.1190686191825	90.9562534111961	90.5414407694263	89.6792548098472	88.0256888852613	84.9445348925808	79.0375118867345	65.9865963252985	16.2361862864315
91.1430044157773	91.1274115487984	90.9631769016592	90.5459106053674	89.6798988219185	88.0207578037398	84.9316331662986	79.0123794066572	65.9373200402811	16.0684859446052
91.1519873678166	91.1357162783749	90.9700558883595	90.5503295654392	89.6804885098776	88.0157738397548	84.9186844380151	78.987206514664	65.887997858344	15.9004563422538
91.1609356934161	91.14398275082	90.9768903949007	90.55469778139	89.6810241088655	88.0107372877608	84.9056889966621	78.9619934387905	65.8386299070125	15.7320963012102
91.1698492961057	91.1522109106101	90.9836804460622	90.5590153851352	89.6815058527404	88.0056484396705	84.8926471281484	78.9367404044218	65.7892163119462	15.5634046278378
91.1787280810294	91.1604007037783	90.9904260677801	90.563282508742	89.6819339740801	88.0005075848804	84.8795591154009	78.9114476343329	65.739757196969	15.394380112321
91.1875719549421	91.1685520779035	90.9971272871288	90.5674992844139	89.6823087041856	87.9953150102983	84.8664252384054	78.8861153487286	65.6902526840994	15.2250215279003
91.1963808262049	91.1766649820989	91.0037841323021	90.5716658444764	89.6826302730842	87.9900710003685	84.8532457742463	78.8607437652825	65.6407028935796	15.0553276300463
91.2051546047808	91.1847393669998	91.0103966325955	90.5757823213625	89.6828989095326	87.9847758370985	84.8400209971463	78.835333099176	65.5911079439039	14.885297155569
91.2138932022304	91.1927751847529	91.0169648183876	90.5798488475988	89.6831148410212	87.9794298000837	84.8267511785047	78.8098835631353	65.5414679518476	14.714928821656
91.2225965317064	91.200772389004	91.023488721123	90.5838655557922	89.6832782937771	87.9740331665333	84.8134365869354	78.7843953674689	65.4917830324944	14.5442213248336
91.2312645079489	91.2087309348867	91.0299683732941	90.5878325786161	89.6833894927688	87.9685862112952	84.8000774883048	78.7588687201039	65.4420532992633	14.3731733398458
91.2398970472798	91.2166507790102	91.0364038084242	90.5917500487979	89.6834486617096	87.9630892068805	84.7866741457679	78.7333038266217	65.3922788639357	14.2017835184417
91.2484940675973	91.224531879448	91.0427950610499	90.5956180991065	89.683456023062	87.957542423488	84.7732268198051	78.707700890293	65.3424598366813	14.0300504880664
91.25705548837	91.2323741957259	91.049142166705	90.59943686234	89.6834117980422	87.9519461290288	84.7597357682577	78.6820601121124	65.2925963260844	13.8579728504448
91.2655812306307	91.2401776888098	91.0554451619028	90.6032064713134	89.6833162066245	87.9463005891495	84.7462012463627	78.6563816908321	65.2426884391685	13.6855491800492
91.2740712169703	91.2479423210944	91.0617040841205	90.6069270588477	89.6831694675455	87.9406060672565	84.7326235067874	78.6306658229954	65.1927362814215	13.5127780224415
91.2825253715315	91.2556680563907	91.0679189717824	90.6105987577582	89.6829717983094	87.9348628245389	84.7190027996638	78.604912702969	65.1427399568201	13.3396578924781
91.2909436200017	91.2633548599144	91.0740898642441	90.6142217008435	89.6827234151922	87.9290711199921	84.7053393726215	78.5791225229752	65.0926995678539	13.1661872723644
91.2993258896065	91.2710026982739	91.0802168017765	90.6177960208749	89.682424533247	87.9232312104402	84.6916334708206	78.5532954731239	65.0426152155485	12.992364609546
91.3076721091026	91.2786115394582	91.0862998255503	90.6213218505861	89.6820753663088	87.9173433505589	84.6778853369845	78.5274317414428	64.9924869994893	12.8181883144208
91.3159822087703	91.286181352825	91.0923389776202	90.6247993226628	89.6816761269995	87.9114077928979	84.6640952114314	78.5015315139085	64.9423150178437	12.6436567578561
91.3242561204068	91.2937121090886	91.0983343009103	90.6282285697331	89.6812270267334	87.9054247879028	84.6502633321057	78.4755949744758	64.8920993673838	12.46876826849
91.3324937773179	91.301203780308	91.1042858391985	90.6316097243579	89.680728275722	87.899394583937	84.6363899346091	78.449622305108	64.8418401435082	12.2935211297984
91.3406951143108	91.3086563398749	91.110193637102	90.6349429190214	89.6801800829799	87.8933174273036	84.6224752522308	78.4236136858047	64.7915374402637	12.1179135769041
91.3488600676861	91.3160697625014	91.1160577400622	90.6382282861221	89.6795826563297	87.8871935622664	84.6085195159775	78.3975692946313	64.7411913503668	11.9419437931002
91.3569885752297	91.3234440242086	91.121878194331	90.6414659579641	89.6789362024076	87.8810232310713	84.594522954603	78.3714893077461	64.6908019652239	11.7656099060628
91.365080576205	91.3307791023139	91.1276550469557	90.6446560667486	89.678240926669	87.8748066739672	84.5804857946368	78.3453738994281	64.6403693749529	11.5889099837174
91.3731360113442	91.3380749754194	91.1333883457656	90.6477987445651	89.6774970333945	87.8685441292265	84.5664082604132	78.3192232421042	64.5898936684022	11.411842029725
91.3811548228404	91.3453316234	91.1390781393576	90.6508941233839	89.6767047256947	87.8622358331656	84.5522905740992	78.2930375063754	64.5393749331717	11.2344039785475
91.3891369543385	91.3525490273911	91.144724477083	90.653942335048	89.6758642055168	87.8558820201652	84.5381329557221	78.2668168610431	64.4888132556317	11.0565936900466
91.3970823509271	91.3597271697771	91.1503274090336	90.6569435112651	89.6749756736498	87.8494829226904	84.523935623197	78.2405614731346	64.4382087209423	10.8784089435657
91.4049909591294	91.3668660341788	91.1558869860285	90.6598977836007	89.6740393297307	87.8430387713101	84.5096987923535	78.2142715079288	64.3875614130725	10.6998474314369
91.4128627268947	91.3739656054423	91.161403259601	90.6628052834707	89.6730553722501	87.8365497947168	84.4954226769623	78.1879471289803	64.3368714148186	10.5209067518497
91.420697603589	91.3810258696266	91.1668762819855	90.6656661421344	89.6720239985583	87.8300162197459	84.4811074887613	78.1615884981448	64.2861388078226	10.3415844010049
91.4284955399862	91.3880468139917	91.1723061061048	90.6684804906875	89.6709454048712	87.8234382713946	84.4667534374811	78.1351957756021	64.2353636725904	10.1618777644744
91.4362564882591	91.3950284269871	91.1776927855575	90.6712484600557	89.6698197862761	87.8168161728413	84.4523607308706	78.1087691198806	64.1845460885094	9.98178410766729
91.4439804019699	91.4019706982398	91.1830363746054	90.6739701809884	89.6686473367384	87.8101501454637	84.4379295747214	78.0823086878802	64.1336861338663	9.80130056529856
91.4516672360607	91.4088736185426	91.1883369281614	90.6766457840522	89.6674282491066	87.8034404088576	84.4234601728932	78.055814634895	64.0827838858637	9.62042412973253
91.4593169468448	91.4157371798424	91.1935945017773	90.6792753996251	89.6661627151195	87.796687180855	84.4089527273371	78.0292871146362	64.0318394206379	9.43915163806187
91.4669294919965	91.4225613752282	91.1988091516319	90.6818591578904	89.6648509254115	87.7898906775424	84.39440743812	78.0027262792543	63.9808528132748	9.25747975775745
91.4745048305419	91.4293461989199	91.2039809345188	90.6843971888314	89.6634930695191	87.7830511132783	84.379824503448	77.9761322793605	63.9298241378269	9.07540497070138
91.4820429228492	91.4360916462565	91.2091099078357	90.6868896222254	89.6620893358871	87.7761687007114	84.3652041196894	77.9495052640485	63.8787534673292	8.89292355538538
91.489543730619	91.4427977136843	91.2141961295719	90.6893365876389	89.6606399118748	87.7692436507973	84.3505464813976	77.9228453809157	63.8276408738155	8.71003156702202
91.4970072168748	91.4494643987457	91.2192396582978	90.691738214422	89.6591449837617	87.7622761728167	84.3358517813337	77.8961527760837	63.7764864283336	8.52672481527506
91.5044333459527	91.4560917000677	91.2242405531531	90.6940946317036	89.6576047367545	87.7552664743915	84.3211202104885	77.8694275942191	63.7252902009615	8.34299883926564
91.5118220834921	91.4626796173499	91.2291988738363	90.6964059683867	89.656019354993	87.7482147615025	84.3063519581041	77.8426699785534	63.674052260822	8.15884887945216
91.5191733964254	91.4692281513541	91.2341146805937	90.6986723531432	89.654389021556	87.7411212385057	84.2915472116962	77.8158800709032	63.622772676098	7.97426984591085
91.5264872529682	91.4757373038919	91.2389880342087	90.7008939144099	89.6527139184681	87.7339861081487	84.2767061570743	77.7890580116893	63.5714515140475	7.78925628245833
91.5337636226096	91.4822070778141	91.2438189959911	90.7030707803838	89.6509942267055	87.7268095715876	84.2618289783635	77.7622039399565	63.5200888410181	7.60380232595347
91.5410024761015	91.4886374769992	91.248607627767	90.705203079018	89.6492301262027	87.7195918284025	84.2469158580246	77.7353179933922	63.4686847224615	7.41790165998976
91.5482037854493	91.4950285063424	91.2533539918682	90.7072909380173	89.6474217958586	87.7123330766136	84.2319669768745	77.7084003083449	63.4172392229472	7.2315474620338
91.5553675239014	91.5013801717441	91.2580581511224	90.7093344848348	89.6455694135424	87.7050335126975	84.2169825141064	77.6814510198433	63.3657524061775	7.04473234287496
91.562493665939	91.507692480099	91.2627201688432	90.7113338466672	89.6436731561006	87.6976933316021	84.2019626473095	77.6544702616135	63.3142243350005	6.85744827701461
91.5695821872664	91.5139654392852	91.26734010882	90.713289150452	89.6417331993626	87.6903127267627	84.1869075524883	77.6274581660978	63.2626550714239	6.66968652232843
91.5766330648002	91.5201990581533	91.2719180353085	90.7152005228632	89.6397497181475	87.6828918901167	84.171817404082	77.6004148644714	63.2110446766289	6.48143752696549
91.58364627666	91.5263933465148	91.2764540130214	90.7170680903082	89.6377228862699	87.6754310121192	84.1566923749834	77.5733404866605	63.1593932109829	6.29269082098123
91.5906218021571	91.5325483151322	91.2809481071184	90.7188919789243	89.6356528765465	87.6679302817575	84.1415326365576	77.5462351613588	63.1077007340529	6.10343488960681
91.5975596217854	91.5386639757076	91.2854003831975	90.7206723145757	89.6335398608022	87.6603898865664	84.1263383586602	77.5190990160446	63.0559673046186	5.91365702429684
91.6044597172104	91.5447403408719	91.2898109072853	90.7224092228501	89.6313840098767	87.6528100126421	84.1111097096559	77.4919321769974	63.0041929806847	5.72334314671298
91.6113220712592	91.5507774241747	91.2941797458285	90.7241028290558	89.62918549363	87.6451908446574	84.095846856436	77.4647347693141	62.9523778194941	5.53247759951896
91.6181466679105	91.556775240073	91.2985069656845	90.7257532582189	89.6269444809494	87.6375325658755	84.0805499644361	77.4375069169251	62.9005218775399	5.34104289617436
91.6249334922841	91.5627338039212	91.3027926341132	90.7273606350804	89.6246611397554	87.6298353581644	84.065219197654	77.4102487426105	62.8486252105779	5.14901941967159
91.6316825306305	91.5686531319601	91.3070368187677	90.7289250840938	89.6223356370078	87.6220994020106	84.0498547186663	77.3829603680153	62.7966878736389	4.95638505714532
91.6383937703213	91.5745332413069	91.3112395876863	90.7304467294221	89.6199681387122	87.6143248765333	84.0344566886455	77.3556419136651	62.7447099210404	4.76311475318536
91.6450671998383	91.5803741499448	91.3154010092838	90.7319256949355	89.6175588099258	87.6065119594977	84.0190252673771	77.3282934989813	62.6926914063991	4.56917995903903
91.6517028087636	91.5861758767123	91.3195211523434	90.7333621042091	89.615107814764	87.5986608273288	84.0035606132758	77.3009152422961	62.6406323826421	4.37454794700886
91.6583005877694	91.5919384412934	91.3236000860084	90.7347560805208	89.6126153164063	87.5907716551247	83.9880628834017	77.2735072608671	62.5885329020187	4.17918094817947
91.6648605286076	91.5976618642074	91.3276378797741	90.7361077468485	89.6100814771024	87.58284461667	83.9725322334765	77.2460696708922	62.5363930161126	3.98303505550745
91.6713826240998	91.6033461667985	91.33163460348	90.7374172258687	89.6075064581786	87.5748798844483	83.9569688178996	77.2186025875239	62.4842127758526	3.78605881067529
91.6778668681271	91.608991371226	91.3355903273021	90.738684639954	89.6048904200437	87.566877629656	83.9413727897632	77.1911061248834	62.4319922315243	3.58819135771261
91.6843132556198	91.6145975004544	91.3395051217447	90.7399101111715	89.6022335221948	87.5588380222145	83.9257443008683	77.1635803960747	62.3797314327818	3.3893599921579
91.6907217825474	91.6201645782431	91.3433790576334	90.7410937612805	89.5995359232242	87.550761230783	83.9100835017395	77.1360255131985	62.3274304286586	3.18947684932282
91.6970924459084	91.6256926291373	91.3472122061072	90.7422357117315	89.5967977808245	87.5426474227713	83.8943905416403	77.1084415873659	62.2750892675791	2.98843433744753
91.7034252437202	91.6311816784575	91.3510046386112	90.7433360836637	89.5940192517954	87.5344967643518	83.8786655685878	77.0808287287116	62.2227079973696	2.78609869139412
91.7097201750091	91.6366317522901	91.3547564268895	90.7443949979038	89.591200492049	87.526309420472	83.8629087293676	77.0531870464076	62.1702866652703	2.58230062340214
91.7159772398001	91.6420428774779	91.3584676429776	90.7454125749646	89.5883416566165	87.5180855548667	83.847120169548	77.0255166486762	62.1178253179459	2.37682132434334
91.7221964391072	91.6474150816104	91.362138359196	90.7463889350433	89.5854428996537	87.5098253300698	83.8313000334942	76.9978176428032	62.0653240014978	2.16937068958899
91.7283777749227	91.6527483930143	91.3657686481426	90.7473241980202	89.582504374447	87.5015289074263	83.8154484643828	76.9700901351502	62.0127827614753	1.95955184440603
91.7345212502081	91.6580428407441	91.369358582686	90.7482184834574	89.5795262334195	87.4931964471041	83.7995656042154	76.9423342311684	61.960201642888	1.74679991495072
91.7406268688838	91.6632984545729	91.3729082359591	90.7490719105974	89.5765086281367	87.4848281081055	83.7836515938325	76.9145500354103	61.9075806902179	1.53026822408436
91.7466946358187	91.6685152649829	91.3764176813519	90.7498845983624	89.5734517093123	87.4764240482787	83.7677065729269	76.8867376515427	61.8549199474325	1.30859476827327
91.7527245568213	91.6736933031564	91.3798869925051	90.7506566653525	89.5703556268145	87.4679844243293	83.7517306800575	76.8588971823592	61.802219457998	1.07935096853726
91.7587166386291	91.6788326009663	91.3833162433039	90.7513882298453	89.5672205296713	87.4595093918315	83.7357240526621	76.8310287297922	61.7494792648947	0.837423929570125
91.7646708888989	91.6839331909678	91.3867055078713	90.7520794097944	89.5640465660765	87.4509991052393	83.7196868270706	76.803132394926	61.6966994106324	0.567889900379598
91.7705873161975	91.6889951063883	91.3900548605618	90.752730322829	89.5608338833955	87.4424537178974	83.7036191385184	76.7752082780083	61.6438799372688	0
91.7764659299914	91.6940183811195	91.3933643759555	90.7533410862524	89.5575826281709	87.433873382052	83.6875211211587	76.7472564784636	61.5910208864292	0
91.7823067406377	91.699003049708	91.3966341288515	90.7539118170417	89.5542929461285	87.4252582488621	83.6713929080752	76.7192770949052	61.538122301003	0
91.7881097593737	91.7039491473465	91.3998641942625	90.7544426318471	89.5509649821827	87.4166084684096	83.6552346312951	76.691270225205	61.4851842209159	0
91.7938749983081	91.7088567098654	91.4030546474082	90.7549336469905	89.5475988804422	87.4079241897103	83.6390464218027	76.6632359664142	61.4322066871341	0
91.7996024704109	91.713725773724	91.4062055637099	90.7553849784657	89.5441947842159	87.399205560724	83.6228284095508	76.6351744148268	61.3791897406222	0
91.8052921895042	91.7185563760015	91.4093170187847	90.7557967419375	89.540752836018	87.3904527283653	83.6065807234733	76.6070856660037	61.3261334217051	0
91.8109441702525	91.7233485543895	91.4123890884396	90.7561690527408	89.5372731775741	87.3816658385137	83.5903034914983	76.5789698147727	61.2730377696921	0
91.8165584281533	91.7281023471824	91.4154218486662	90.7565020258805	89.5337559498265	87.3728450360238	83.5739968405598	76.5508269552166	61.2199028226682	0
91.8221349795281	91.73281779327	91.4184153756347	90.7567957760313	89.5302012929396	87.3639904647352	83.5576608966097	76.5226571806556	61.1667286173924	0
91.8276738415125	91.7374949321287	91.4213697456892	90.7570504175364	89.5266093463058	87.355102267483	83.5412957846284	76.4944605836289	61.1135151892627	0
91.8331750320472	91.7421338038132	91.4242850353416	90.7572660644083	89.5229802485504	87.3461805861072	83.5249016286337	76.4662372558766	61.0602625723216	0
91.838638569869	91.7467344489486	91.4271613212667	90.7574428303274	89.5193141375377	87.3372255614626	83.5084785516904	76.4379872883244	61.0069707992852	0
91.8440644745012	91.7512969087225	91.4299986802972	90.7575808286425	89.5156111503759	87.3282373334283	83.4920266759177	76.4097107710704	60.9536399015855	0
91.8494527662447	91.7558212248764	91.4327971894182	90.7576801723704	89.5118714234225	87.3192160409172	83.475546122497	76.3814077933758	60.9002699094185	0
91.8548034661688	91.7603074396981	91.4355569257621	90.7577409741954	89.5080950922901	87.3101618218852	83.4590370116784	76.3530784436577	60.8468608517951	0
91.8601165961023	91.764755596014	91.4382779666041	90.7577633464695	89.5042822918511	87.30107481334	83.4424994627881	76.3247228094847	60.793412756591	0
91.8653921786247	91.769165737181	91.4409603893568	90.7577474012122	89.5004331562436	87.2919551513501	83.4259335942338	76.2963409775756	60.7399256505946	0
91.8706302370566	91.7735379070788	91.4436042715659	90.7576932501103	89.496547818876	87.2828029710536	83.4093395235111	76.2679330337986	60.6863995595522	0
91.8758307954516	91.7778721501024	91.4462096909048	90.7576010045183	89.4926264124327	87.2736184066664	83.3927173672099	76.2394990631745	60.6328345082111	0
91.8809938785872	91.7821685111541	91.4487767251704	90.7574707754577	89.488669068879	87.2644015914906	83.3760672410198	76.2110391498795	60.5792305203579	0
91.8861195119558	91.7864270356366	91.4513054522785	90.7573026736176	89.4846759194664	87.2551526579228	83.3593892597362	76.1825533772501	60.5255876188552	0
91.8912077217563	91.790647769445	91.453795950259	90.7570968093547	89.4806470947373	87.2458717374617	83.3426835372665	76.1540418277896	60.4719058256747	0
91.8962585348853	91.7948307589596	91.4562482972512	90.7568532926931	89.4765827245305	87.2365589607164	83.3259501866355	76.1255045831742	60.4181851619281	0
91.9012719789287	91.7989760510386	91.4586625715004	90.7565722333248	89.4724829379857	87.2272144574137	83.3091893199918	76.0969417242611	60.3644256478949	0
91.9062480821527	91.8030836930106	91.4610388513522	90.7562537406096	89.4683478635489	87.217838356406	83.2924010486139	76.0683533310962	60.3106273030487	0
91.911186873496	91.8071537326679	91.4633772152493	90.7558979235753	89.4641776289769	87.2084307856782	83.275585482916	76.0397394829229	60.2567901460809	0
91.9160883825607	91.8111862182587	91.4656777417268	90.7555048909183	89.4599723613423	87.1989918723556	83.2587427324549	76.0111002581908	60.2029141949229	0
91.9209526396045	91.8151811984807	91.467940509408	90.7550747510032	89.4557321870382	87.1895217427109	83.2418729059356	75.9824357345649	60.1489994667667	0
91.9257796755318	91.8191387224737	91.4701655970005	90.7546076118637	89.4514572317829	87.1800205221708	83.224976111218	75.953745988935	60.0950459780835	0
91.9305695218861	91.8230588398125	91.4723530832922	90.7541035812022	89.4471476206249	87.1704883353238	83.2080524553238	75.9250310974247	60.0410537446419	0
91.9353222108411	91.8269416005008	91.4745030471471	90.7535627663909	89.4428034779471	87.1609253059266	83.1911020444421	75.8962911354013	59.987022781524	0
91.9400377751933	91.8307870549633	91.4766155675016	90.7529852744716	89.4384249274717	87.1513315569109	83.1741249839371	75.8675261774852	59.9329531031408	0
91.9447162483533	91.8345952540401	91.4786907233605	90.7523712121561	89.4340120922647	87.1417072103905	83.1571213783538	75.8387362975591	59.878844723247	0
91.949357664338	91.8383662489791	91.4807285937933	90.7517206858268	89.4295650947401	87.1320523876673	83.1400913314256	75.8099215687777	59.8246976549538	0
91.9539620577629	91.8421000914299	91.4827292579305	90.7510338015369	89.4250840566648	87.1223672092387	83.1230349460802	75.7810820635768	59.7705119107425	0
91.9585294638336	91.8457968334371	91.4846927949598	90.7503106650108	89.4205690991629	87.1126517948034	83.1059523244472	75.7522178536828	59.7162875024758	0
91.9630599183387	91.8494565274339	91.4866192841227	90.7495513816448	89.4160203427197	87.1029062632684	83.0888435678645	75.7233290101215	59.6620244414095	0
91.9675534576412	91.8530792262355	91.4885088047104	90.7487560565071	89.4114379071866	87.0931307327549	83.071708776885	75.6944156032275	59.6077227382031	0
91.9720101186715	91.856664983033	91.4903614360609	90.7479247943386	89.406821911785	87.0833253206049	83.0545480512841	75.6654777026526	59.5533824029302	0
91.9764299389193	91.8602138513869	91.4921772575554	90.7470576995534	89.4021724751104	87.0734901433877	83.0373614900658	75.6365153773753	59.4990034450879	0
91.9808129564261	91.8637258852209	91.4939563486144	90.7461548762391	89.3974897151372	87.0636253169054	83.0201491914704	75.6075286957087	59.4445858736062	0
91.9851592097777	91.8672011388158	91.495698788695	90.7452164281572	89.3927737492224	87.0537309562	83.0029112529805	75.5785177253091	59.390129696857	0
91.9894687380965	91.8706396668034	91.4974046572872	90.744242458744	89.3880246941098	87.0438071755588	82.9856477713287	75.5494825331849	59.3356349226621	0
91.9937415810344	91.8740415241602	91.4990740339106	90.7432330711109	89.3832426659341	87.0338540885207	82.9683588425038	75.5204231857039	59.2811015583013	0
91.9979777787652	91.877406766202	91.5007069981115	90.7421883680448	89.378427780225	87.0238718078822	82.9510445617582	75.4913397486022	59.2265296105206	0
92.0021773719774	91.8807354485773	91.5023036294595	90.741108452009	89.3735801519114	87.0138604457036	82.9337050236142	75.4622322869915	59.171919085539	0
92.0063404018666	91.8840276272617	91.5038640075442	90.7399934251435	89.3686998953249	87.0038201133145	82.916340321871	75.433100865367	59.1172699890562	0
92.0104669101288	91.8872833585522	91.5053882119727	90.7388433892657	89.3637871242043	86.9937509213201	82.8989505496117	75.4039455476153	59.0625823262588	0
92.0145569389531	91.8905026990614	91.506876322366	90.7376584458709	89.358841951699	86.9836529796068	82.8815357992094	75.3747663970214	59.0078561018275	0
92.0186105310145	91.8936857057117	91.5083284183562	90.7364386961331	89.3538644903735	86.9735263973481	82.8640961623347	75.3455634762763	58.9530913199431	0
92.0226277294668	91.8968324357297	91.5097445795839	90.7351842409051	89.3488548522107	86.9633712830102	82.8466317299615	75.3163368474844	58.8982879842929	0
92.026608577936	91.8999429466407	91.5111248856946	90.7338951807198	89.3438131486158	86.9531877443579	82.8291425923742	75.2870865721701	58.8434460980763	0
92.030553120513	91.9030172962632	91.5124694163365	90.7325716157904	89.3387394904205	86.9429758884603	82.8116288391738	75.2578127112851	58.7885656640109	0
92.034461401747	91.9060555427033	91.5137782511575	90.7312136460111	89.3336339878863	86.9327358216961	82.794090559285	75.2285153252149	58.7336466843379	0
92.0383334666386	91.9090577443493	91.5150514698023	90.7298213709577	89.3284967507086	86.9224676497597	82.7765278409618	75.1991944737859	58.6786891608275	0
92.0421693606332	91.9120239598665	91.5162891519097	90.7283948898885	89.3233278880199	86.9121714776662	82.7589407717947	75.1698502162717	58.6236930947843	0
92.0459691296142	91.9149542481918	91.5174913771101	90.7269343017447	89.3181275083942	86.9018474097574	82.7413294387165	75.1404826113995	58.568658487052	0
92.0497328198963	91.9178486685285	91.5186582250226	90.7254397051511	89.31289571985	86.8914955497069	82.7236939280089	75.1110917173567	58.5135853380189	0
92.0534604782194	91.920707280341	91.5197897752527	90.7239111984168	89.3076326298543	86.8811160005256	82.7060343253085	75.0816775917966	58.4584736476221	0
92.0571521517414	91.9235301433498	91.5208861073895	90.7223488795361	89.302338345326	86.8707088645674	82.6883507156132	75.0522402918454	58.4033234153525	0
92.0608078880324	91.9263173175265	91.5219473010031	90.7207528461887	89.2970129726395	86.860274243534	82.6706431832881	75.0227798741071	58.3481346402594	0
92.064427735068	91.9290688630885	91.5229734356424	90.7191231957409	89.2916566176285	86.8498122384806	82.6529118120716	74.9932963946705	58.2929073209549	0
92.068011741223	91.9317848404943	91.5239645908326	90.717460025246	89.2862693855891	86.8393229498211	82.6351566850816	74.963789909114	58.2376414556178	0
92.0715599552651	91.9344653104383	91.5249208460724	90.7157634314452	89.2808513812836	86.8288064773333	82.6173778848212	74.9342604725123	58.1823370419986	0
92.075072426349	91.9371103338464	91.5258422808322	90.714033510768	89.2754027089438	86.8182629201639	82.5995754931846	74.9047081394411	58.1269940774228	0
92.0785492040097	91.9397199718706	91.5267289745512	90.7122703593334	89.2699234722745	86.8076923768339	82.5817495914632	74.8751329639832	58.0716125587954	0
92.0819903381568	91.9422942858848	91.5275810066355	90.7104740729502	89.2644137744572	86.7970949452436	82.5639002603508	74.8455349997336	58.0161924826046	0
92.0853958790685	91.9448333374794	91.5283984564558	90.7086447471178	89.2588737181528	86.7864707226775	82.5460275799501	74.8159142998053	57.9607338449258	0
92.0887658773853	91.9473371884575	91.5291814033448	90.7067824770273	89.2533034055058	86.7758198058097	82.5281316297775	74.7862709168338	57.9052366414251	0
92.0921003841043	91.9498059008296	91.5299299265954	90.7048873575616	89.2477029381471	86.7651422907084	82.5102124887693	74.756604902983	57.8497008673632	0
92.0953994505733	91.9522395368093	91.5306441054583	90.7029594832969	89.2420724171973	86.7544382728412	82.4922702352869	74.7269163099499	57.7941265175986	0
92.0986631284848	91.9546381588089	91.53132401914	90.7009989485028	89.2364119432705	86.74370784708	82.4743049471223	74.6972051889696	57.7385135865916	0
92.1018914698705	91.9570018294346	91.5319697468006	90.6990058471435	89.2307216164771	86.7329511077055	82.4563167015038	74.6674715908205	57.6828620684074	0
92.1050845270954	91.9593306114824	91.5325813675518	90.6969802728781	89.2250015364272	86.7221681484124	82.4383055751007	74.6377155658287	57.6271719567193	0
92.1082423528522	91.9616245679338	91.5331589604548	90.6949223190621	89.2192518022339	86.7113590623138	82.4202716440295	74.6079371638733	57.5714432448123	0
92.1113650001556	91.9638837619509	91.5337026045181	90.6928320787473	89.2134725125165	86.7005239419466	82.4022149838583	74.5781364343905	57.5156759255863	0
92.1144525223372	91.9661082568729	91.5342123786961	90.6907096446832	89.2076637654037	86.6896628792752	82.3841356696123	74.548313426379	57.4598699915588	0
92.1175049730391	91.9682981162113	91.5346883618866	90.6885551093177	89.2018256585366	86.6787759656972	82.3660337757792	74.5184681884036	57.4040254348687	0
92.1205224062095	91.9704534036461	91.5351306329289	90.6863685647976	89.1959582890721	86.6678632920473	82.3479093763135	74.4886007686005	57.3481422472787	0
92.1235048760964	91.9725741830213	91.5355392706023	90.6841501029695	89.1900617536859	86.6569249486019	82.3297625446425	74.4587112146816	57.2922204201784	0
92.126452437243	91.9746605183411	91.535914353624	90.6818998153807	89.1841361485755	86.6459610250844	82.3115933536703	74.4287995739383	57.2362599445875	0
92.1293651444818	91.9767124737659	91.5362559606471	90.6796177932801	89.1781815694635	86.6349716106685	82.2934018757835	74.3988658932465	57.1802608111582	0
92.1322430529298	91.978730113608	91.5365641702592	90.6773041276187	89.1721981116007	86.6239567939838	82.2751881828553	74.3689102190702	57.1242230101786	0
92.135086217983	91.9807135023278	91.5368390609801	90.6749589090504	89.1661858697686	86.6129166631194	82.2569523462509	74.3389325974664	57.0681465315748	0
92.1378946953117	91.9826627045301	91.5370807112608	90.6725822279333	89.1601449382833	86.6018513056288	82.2386944368319	74.3089330740885	57.0120313649138	0
92.1406685408548	91.98457778496	91.537289199481	90.6701741743298	89.1540754109978	86.5907608085339	82.220414524961	74.2789116941906	56.9558774994065	0
92.1434078108153	91.9864588084989	91.5374646039477	90.6677348380079	89.1479773813051	86.5796452583295	82.2021126805067	74.248868502632	56.8996849239099	0
92.1461125616551	91.9883058401612	91.5376070028939	90.6652643084421	89.1418509421415	86.5685047409875	82.1837889728479	74.2188035438801	56.8434536269295	0
92.1487828500901	91.9901189450904	91.5377164744763	90.6627626748135	89.1356961859891	86.5573393419611	82.1654434708784	74.1887168620153	56.7871835966225	0
92.1514187330851	91.991898188555	91.5377930967744	90.6602300260117	89.1295132048792	86.5461491461892	82.1470762430112	74.1586085007343	56.7308748207996	0
92.1540202678495	91.9936436359455	91.5378369477882	90.6576664506345	89.1233020903946	86.5349342381002	82.1286873571832	74.1284785033539	56.6745272869276	0
92.1565875118319	91.9953553527703	91.537848105437	90.6550720369897	89.1170629336729	86.5236947016163	82.1102768808593	74.098326912815	56.6181409821319	0
92.1591205227159	91.9970334046523	91.5378266475582	90.6524468730953	89.1107958254095	86.5124306201576	82.0918448810371	74.0681537716859	56.5617158931988	0
92.1616193584148	91.9986778573254	91.5377726519051	90.6497910466803	89.1045008558599	86.5011420766463	82.0733914242507	74.0379591221662	56.5052520065776	0
92.1640840770677	92.0002887766311	91.5376861961459	90.6471046451863	89.098178114843	86.4898291535103	82.0549165765753	74.0077430060904	56.448749308383	0
92.1665147370344	92.0018662285147	91.5375673578619	90.6443877557672	89.0918276917436	86.4784919326873	82.0364204036312	73.9775054649312	56.3922077843976	0
92.1689113968907	92.0034102790223	91.5374162145464	90.6416404652911	89.0854496755153	86.4671304956291	82.0179029705879	73.9472465398031	56.3356274200733	0
92.1712741154247	92.0049209942973	91.5372328436032	90.6388628603403	89.0790441546834	86.455744923305	81.9993643421684	73.916966271466	56.2790082005345	0
92.1736029516314	92.006398440577	91.537017322345	90.6360550272127	89.0726112173475	86.444335296206	81.9808045826531	73.8866647003283	56.2223501105791	0
92.175897964709	92.0078426841894	91.5367697279922	90.6332170519225	89.0661509511839	86.4329016943485	81.9622237558837	73.8563418664505	56.1656531346815	0
92.1781592140539	92.0092537915496	91.5364901376716	90.6303490202007	89.059663443449	86.4214441972779	81.9436219252672	73.8259978095483	56.108917256994	0
92.1803867592572	92.0106318291573	91.5361786284148	90.6274510174965	89.0531487809815	86.4099628840727	81.9249991537801	73.795632568996	56.0521424613493	0
92.1825806600997	92.011976863593	91.5358352771574	90.6245231289777	89.0466070502051	86.3984578333482	81.9063555039718	73.7652461838297	55.9953287312619	0
92.184740976548	92.0132889615151	91.5354601607371	90.6215654395318	89.0400383371311	86.3869291232597	81.8876910379687	73.7348386927504	55.9384760499308	0
92.1868677687503	92.0145681896568	91.535053355893	90.6185780337668	89.0334427273615	86.3753768315067	81.869005817478	73.7044101341272	55.8815844002405	0
92.1889610970323	92.0158146148229	91.534614939264	90.6155609960119	89.0268203060909	86.3638010353364	81.8502999037914	73.6739605460005	55.8246537647637	0
92.191021021893	92.017028303887	91.5341449873878	90.6125144103186	89.0201711581097	86.3522018115471	81.8315733577885	73.6434899660847	55.7676841257625	0
92.1930476040007	92.0182093237884	91.5336435766995	90.6094383604613	89.0134953678061	86.3405792364918	81.8128262399409	73.6129984317718	55.7106754651909	0
92.1950409041889	92.0193577415289	91.5331107835306	90.6063329299383	89.0067930191692	86.3289333860818	81.7940586103157	73.5824859801338	55.6536277646958	0
92.1970009834526	92.0204736241705	91.5325466841077	90.6031982019726	89.0000641957913	86.3172643357903	81.7752705285789	73.5519526479259	55.5965410056193	0
92.1989279029442	92.0215570388318	91.5319513545517	90.6000342595127	88.9933089808703	86.3055721606554	81.7564620539989	73.5213984715895	55.5394151690005	0
92.2008217239696	92.0226080526856	91.5313248708762	90.5968411852338	88.9865274572123	86.2938569352842	81.7376332454505	73.490823487255	55.4822502355767	0
92.2026825079844	92.0236267329557	91.5306673089866	90.5936190615381	88.9797197072341	86.2821187338555	81.7187841614177	73.4602277307445	55.4250461857855	0
92.2045103165901	92.0246131469149	91.5299787446793	90.5903679705559	88.9728858129658	86.2703576301236	81.6999148599974	73.4296112375747	55.3678029997664	0
92.2063052115304	92.0255673618812	91.5292592536402	90.5870879941467	88.9660258560527	86.2585736974216	81.681025398903	73.3989740429598	55.3105206573622	0
92.2080672546875	92.0264894452159	91.528508911444	90.5837792138996	88.9591399177586	86.2467670086644	81.6621158354675	73.3683161818141	55.2531991381208	0
92.2097965080784	92.0273794643203	91.527727793553	90.5804417111346	88.9522280789673	86.2349376363523	81.6431862266466	73.3376376887544	55.1958384212968	0
92.211493033851	92.0282374866338	91.5269159753162	90.5770755669031	88.9452904201857	86.223085652574	81.6242366290225	73.3069385981035	55.1384384858529	0
92.2131568942812	92.0290635796306	91.5260735319682	90.573680861989	88.9383270215456	86.2112111290099	81.6052670988069	73.2762189438919	55.0809993104615	0
92.2147881517685	92.0298578108172	91.5252005386283	90.5702576769094	88.9313379628066	86.1993141369354	81.586277691844	73.245478759861	55.0235208735062	0
92.2163868688331	92.0306202477304	91.5242970702996	90.5668060919154	88.924323323358	86.1873947472236	81.5672684636139	73.2147180794655	54.9660031530834	0
92.2179531081124	92.031350957934	91.5233632018682	90.5633261869931	88.9172831822213	86.1754530303491	81.5482394692357	73.1839369358757	54.9084461270036	0
92.2194869323571	92.0320500090169	91.5223990081019	90.5598180418647	88.9102176180527	86.1634890563904	81.5291907634706	73.1531353619805	54.8508497727926	0
92.2209884044283	92.0327174685905	91.5214045636495	90.5562817359886	88.9031267091448	86.1515028950335	81.5101224007249	73.1223133903896	54.7932140676936	0
92.2224575872938	92.0333534042859	91.5203799430401	90.5527173485611	88.8960105334295	86.1394946155744	81.491034435053	73.0914710534359	54.7355389886679	0
92.2238945440252	92.033957883752	91.5193252206821	90.5491249585167	88.8888691684801	86.1274642869228	81.4719269201607	73.060608383178	54.6778245123966	0
92.225299337794	92.034530974653	91.5182404708621	90.5455046445289	88.8817026915131	86.1154119776042	81.4527999094078	73.0297254114025	54.620070615282	0
92.2266720318691	92.0350727446659	91.5171257677447	90.5418564850118	88.874511179391	86.1033377557636	81.4336534558112	72.9988221696266	54.5622772734486	0
92.2280126896128	92.0355832614782	91.515981185371	90.5381805581199	88.8672947086241	86.091241689168	81.4144876120479	72.9678986891004	54.5044444627449	0
92.2293213744784	92.0360625927858	91.5148067976582	90.5344769417498	88.8600533553731	86.0791238452095	81.3953024304576	72.9369550008089	54.4465721587441	0
92.2305981500066	92.0365108062906	91.5136026783986	90.5307457135406	88.8527871954507	86.0669842909079	81.3760979630459	72.9059911354745	54.3886603367458	0
92.2318430798223	92.0369279696983	91.5123689012594	90.5269869508747	88.8454963043242	86.0548230929138	81.3568742614868	72.8750071235594	54.3307089717773	0
92.2330562276319	92.0373141507164	91.511105539781	90.5232007308792	88.8381807571176	86.0426403175114	81.3376313771256	72.8440029952675	54.2727180385943	0
92.2342376572202	92.0376694170515	91.5098126673769	90.5193871304259	88.8308406286133	86.030436030621	81.318369360982	72.8129787805471	54.2146875116828	0
92.2353874324472	92.0379938364079	91.5084903573331	90.5155462261329	88.8234759932549	86.018210297802	81.2990882637521	72.7819345090924	54.1566173652596	0
92.2365056172453	92.0382874764849	91.507138682807	90.5116780943651	88.8160869251488	86.0059631842557	81.2797881358116	72.7508702103464	54.0985075732741	0
92.2375922756162	92.0385504049748	91.5057577168267	90.507782811235	88.8086734980661	85.9936947548276	81.2604690272186	72.7197859135023	54.040358109409	0
92.2386474716285	92.0387826895613	91.5043475322908	90.5038604526037	88.8012357854453	85.9814050740107	81.2411309877158	72.6886816475062	53.9821689470816	0
92.2396712694142	92.0389843979168	91.5029082019671	90.4999110940816	88.7937738603939	85.9690942059476	81.2217740667334	72.657557441059	53.9239400594451	0
92.2406637331662	92.0391555977011	91.5014397984924	90.4959348110292	88.7862877956904	85.9567622144333	81.2023983133916	72.6264133226182	53.8656714193892	0
92.2416249271356	92.0392963565585	91.499942394372	90.4919316785584	88.7787776637865	85.9444091629179	81.1830037765031	72.5952493204005	53.8073629995417	0
92.2425549156287	92.0394067421169	91.4984160619783	90.4879017715326	88.7712435368091	85.9320351145091	81.1635905045758	72.564065462383	53.7490147722693	0
92.2434537630046	92.0394868219852	91.4968608735511	90.4838451645681	88.763685486562	85.919640131975	81.1441585458153	72.532861776306	53.6906267096789	0
92.2443215336722	92.0395366637515	91.4952769011964	90.4797619320346	88.7561035845283	85.907224277746	81.1247079481272	72.5016382896746	53.6321987836182	0
92.2451582920875	92.0395563349813	91.4936642168864	90.4756521480563	88.748497901872	85.8947876139181	81.1052387591196	72.4703950297605	53.5737309656769	0
92.2459641027515	92.0395459032156	91.4920228924579	90.4715158865125	88.74086850944	85.8823302022547	81.0857510261057	72.4391320236044	53.5152232271881	0
92.2467390302069	92.0395054359694	91.4903529996131	90.4673532210386	88.7332154777643	85.8698521041896	81.0662447961059	72.4078492980173	53.4566755392286	0
92.247483139036	92.0394350007292	91.4886546099179	90.4631642250269	88.7255388770633	85.857353380829	81.0467201158506	72.3765468795828	53.3980878726205	0
92.2481964938582	92.0393346649519	91.4869277948021	90.4589489716273	88.7178387772446	85.8448340929543	81.0271770317822	72.3452247946589	53.3394601979317	0
92.2488791593269	92.0392044960626	91.4851726255584	90.4547075337481	88.7101152479058	85.8322943010243	81.0076155900575	72.3138830693798	53.280792485477	0
92.2495312001279	92.0390445614534	91.4833891733423	90.4504399840572	88.7023683583374	85.8197340651775	80.9880358365502	72.2825217296576	53.222084705319	0
92.2501526809764	92.0388549284808	91.4815775091712	90.4461463949822	88.6945981775239	85.8071534452345	80.9684378168528	72.2511408011844	53.1633368272692	0
92.2507436666146	92.038635664465	91.4797377039244	90.4418268387122	88.686804774146	85.7945525007005	80.9488215762794	72.2197403094337	53.1045488208887	0
92.2513042218095	92.0383868366876	91.4778698283421	90.4374813871976	88.6789882165824	85.7819312907675	80.9291871598675	72.1883202796625	53.045720655489	0
92.2518344113504	92.0381085123903	91.4759739530254	90.4331101121517	88.6711485729113	85.7692898743164	80.9095346123803	72.1568807369128	52.986852300133	0
92.2523343000468	92.0378007587728	91.4740501484356	90.4287130850511	88.6632859109127	85.7566283099194	80.889863978309	72.1254217060135	52.9279437236359	0
92.2528039527258	92.0374636429921	91.4720984848937	90.4242903771364	88.6554002980699	85.7439466558425	80.8701753018749	72.093943211582	52.8689948945659	0
92.25324343423	92.0370972321598	91.4701190325801	90.4198420594136	88.6474918015711	85.7312449700474	80.8504686270316	72.062445278026	52.8100057812453	0
92.2536528094154	92.0367015933415	91.4681118615344	90.4153682026542	88.6395604883114	85.7185233101937	80.830743997467	72.0309279295449	52.7509763517509	0
92.2540321431488	92.0362767935548	91.4660770416546	90.4108688773966	88.6316064248947	85.7057817336412	80.8110014566054	71.9993911901319	52.6919065739149	0
92.254381500306	92.035822899768	91.4640146426968	90.4063441539463	88.6236296776349	85.6930202974521	80.7912410476101	71.967835083575	52.6327964153261	0
92.2547009457695	92.0353399788982	91.461924734275	90.4017941023773	88.6156303125581	85.6802390583931	80.7714628133845	71.9362596334595	52.5736458433302	0
92.2549905444262	92.0348280978105	91.4598073858606	90.3972187925325	88.607608395404	85.6674380729374	80.7516667965749	71.9046648631685	52.5144548250307	0
92.2552503611655	92.0342873233161	91.457662666782	90.3926182940246	88.599563991628	85.6546173972669	80.7318530395724	71.8730507958856	52.4552233272897	0
92.2554804608775	92.0337177221707	91.4554906462246	90.3879926762371	88.5914971664022	85.6417770872746	80.7120215845147	71.8414174545955	52.3959513167287	0
92.2556809084501	92.0331193610739	91.4532913932296	90.3833420083246	88.5834079846178	85.6289171985658	80.6921724732881	71.8097648620862	52.336638759729	0
92.2558517687679	92.0324923066668	91.4510649766948	90.3786663592141	88.5752965108861	85.6160377864612	80.6723057475295	71.7780930409503	52.2772856224329	0
92.2559931067096	92.0318366255315	91.4488114653733	90.3739657976055	88.5671628095406	85.6031389059983	80.6524214486286	71.7464020135864	52.2178918707439	0
92.2561049871464	92.0311523841891	91.4465309278738	90.3692403919726	88.5590069446386	85.5902206119333	80.6325196177293	71.7146918022009	52.1584574703279	0
92.2561874749398	92.030439649099	91.44422343266	90.3644902105636	88.5508289799624	85.5772829587436	80.6126002957322	71.682962428809	52.0989823866132	0
92.2562406349398	92.0296984866569	91.4418890480505	90.359715321402	88.5426289790214	85.5643260006294	80.592663523296	71.6512139152369	52.0394665847919	0
92.2562645319829	92.028928963194	91.4395278422183	90.3549157922876	88.5344070050533	85.5513497915157	80.5727093408394	71.6194462831224	51.97991002982	0
92.2562592308904	92.0281311449759	91.4371398831907	90.3500916907968	88.5261631210259	85.5383543850545	80.5527377885434	71.587659553917	51.9203126864185	0
92.2562247964662	92.0273050982007	91.4347252388488	90.345243084284	88.5178973896388	85.5253398346263	80.5327489063525	71.555853748887	51.8606745190735	0
92.2561612934957	92.0264508889983	91.4322839769276	90.3403700398816	88.5096098733245	85.5123061933423	80.5127427339772	71.5240288891148	51.8009954920372	0
92.2560687867431	92.025568583429	91.4298161650156	90.3354726245015	88.5013006342503	85.4992535140461	80.492719310895	71.4921849955009	51.7412755693284	0
92.2559473409502	92.0246582474823	91.4273218705542	90.3305509048356	88.4929697343197	85.4861818493158	80.4726786763528	71.4603220887645	51.6815147147332	0
92.2557970208345	92.0237199470758	91.4248011608382	90.3256049473563	88.4846172351742	85.4730912514657	80.4526208693686	71.4284401894452	51.6217128918054	0
92.2556178910875	92.022753748054	91.4222541030147	90.3206348183176	88.4762431981941	85.459981772548	80.4325459287327	71.3965393179045	51.561870063867	0
92.2554100163729	92.0217597161872	91.4196807640837	90.3156405837558	88.4678476845009	85.4468534643549	80.4124538930101	71.364619494327	51.5019861940092	0
92.2551734613251	92.0207379171703	91.4170812108973	90.31062230949	88.459430754958	85.4337063784204	80.3923448005417	71.3326807387216	51.4420612450926	0
92.2549082905471	92.0196884166218	91.41445551016	90.3055800611233	88.4509924701728	85.4205405660215	80.3722186894466	71.3007230709229	51.3820951797477	0
92.2546145686096	92.0186112800825	91.4118037284279	90.3005139040432	88.4425328904977	85.407356078181	80.3520755976228	71.2687465105928	51.3220879603756	0
92.2542923600487	92.0175065730148	91.4091259321091	90.2954239034224	88.4340520760317	85.3941529656683	80.3319155627498	71.236751077221	51.2620395491486	0
92.2539417293645	92.0163743608012	91.4064221874631	90.2903101242196	88.4255500866219	85.3809312790015	80.3117386222898	71.2047367901273	51.2019499080104	0
92.25356274102	92.0152147087437	91.4036925606011	90.2851726311805	88.4170269818649	85.3676910684493	80.2915448134894	71.1727036684618	51.1418189986771	0
92.2531554594386	92.0140276820623	91.4009371174851	90.2800114888379	88.4084828211083	85.3544323840325	80.2713341733811	71.1406517312069	51.081646782637	0
92.2527199490035	92.0128133458946	91.3981559239286	90.2748267615132	88.3999176634519	85.3411552755256	80.2511067387851	71.1085809971784	51.0214332211519	0
92.2522562740556	92.0115717652942	91.3953490455958	90.2696185133164	88.3913315677491	85.3278597924588	80.2308625463106	71.0764914850263	50.9611782752568	0
92.2517644988924	92.0103030052302	91.3925165480018	90.2643868081476	88.3827245926087	85.3145459841194	80.2106016323578	71.0443832132365	50.9008819057608	0
92.2512446877661	92.0090071305858	91.3896584965123	90.259131709697	88.3740967963958	85.3012138995533	80.1903240331189	71.0122562001318	50.8405440732478	0
92.2506969048827	92.0076842061578	91.3867749563436	90.2538532814463	88.3654482372332	85.2878635875672	80.17002978458	70.9801104638728	50.7801647380762	0
92.2501212143999	92.0063342966554	91.3838659925625	90.2485515866687	88.3567789730031	85.2744950967296	80.1497189225226	70.9479460224596	50.71974386038	0
92.2495176804264	92.0049574666994	91.380931670086	90.2432266884302	88.3480890613483	85.2611084753728	80.1293914825249	70.9157628937327	50.659281400069	0
92.24888636702	92.0035537808211	91.3779720536812	90.2378786495904	88.3393785596732	85.2477037715941	80.1090474999635	70.8835610953738	50.5987773168291	0
92.2482273381864	92.0021233034618	91.3749872079657	90.2325075328025	88.3306475251456	85.2342810332581	80.0886870100148	70.8513406449077	50.538231570123	0
92.2475406578779	92.0006660989715	91.3719771974066	90.2271134005148	88.3218960146978	85.2208403079973	80.0683100476563	70.8191015597025	50.4776441191903	0
92.2468263899921	91.9991822316085	91.3689420863213	90.2216963149711	88.3131240850278	85.2073816432144	80.0479166476683	70.7868438569716	50.4170149230481	0
92.2460845983704	91.9976717655381	91.365881938877	90.2162563382111	88.3043317926008	85.1939050860835	80.0275068446352	70.7545675537742	50.3563439404913	0
92.2453153467969	91.996134764832	91.3627968190906	90.2107935320718	88.2955191936504	85.1804106835517	80.007080672947	70.7222726670166	50.2956311300931	0
92.2445186989969	91.9945712934676	91.3596867908286	90.2053079581876	88.2866863441799	85.1668984823405	79.9866381668004	70.689959213453	50.2348764502052	0
92.243694718636	91.992981415327	91.3565519178075	90.1997996779913	88.2778332999635	85.1533685289475	79.9661793602009	70.6576272096873	50.1740798589582	0
92.2428434693187	91.9913651941962	91.3533922635929	90.1942687527147	88.2689601165476	85.1398208696477	79.9457042869632	70.6252766721731	50.113241314262	0
92.2419650145868	91.9897226937647	91.3502078916005	90.1887152433894	88.2600668492521	85.126255550495	79.9252129807134	70.5929076172158	50.0523607738063	0
92.2410594179189	91.9880539776242	91.346998865095	90.1831392108474	88.2511535531714	85.1126726173238	79.9047054748898	70.5605200609728	49.9914381950607	0
92.2401267427287	91.9863591092683	91.3437652471909	90.1775407157218	88.242220283176	85.0990721157502	79.8841818027448	70.528114019455	49.9304735352749	0
92.239167052364	91.9846381520914	91.340507100852	90.1719198184476	88.2332670939136	85.0854540911736	79.8636419973455	70.4956895085275	49.8694667514795	0
92.2381804101055	91.9828911693884	91.3372244888915	90.1662765792622	88.22429403981	85.071818588778	79.8430860915757	70.4632465439111	49.8084178004861	0
92.2371668791658	91.9811182243535	91.3339174739721	90.1606110582062	88.2153011750707	85.0581656535337	79.8225141181368	70.4307851411826	49.7473266388872	0
92.2361265226882	91.97931938008	91.3305861186056	90.1549233151243	88.206288553682	85.0444953301981	79.8019261095491	70.3983053157764	49.6861932230573	0
92.2350594037456	91.9774946995593	91.3272304851535	90.1492134096656	88.197256229412	85.0308076633177	79.7813220981534	70.365807082985	49.6250175091525	0
92.2339655853393	91.9756442456804	91.3238506358264	90.1434814012843	88.1882042558119	85.0171026972292	79.760702116112	70.3332904579604	49.5637994531111	0
92.2328451303981	91.9737680812291	91.3204466326845	90.1377273492408	88.1791326862173	85.0033804760608	79.7400661954097	70.3007554557146	49.5025390106538	0
92.2316981017774	91.9718662688874	91.317018537637	90.1319513126021	88.1700415737491	84.9896410437336	79.7194143678556	70.268202091121	49.4412361372841	0
92.2305245622578	91.9699388712329	91.3135664124428	90.1261533502422	88.1609309713148	84.9758844439629	79.6987466650842	70.2356303789148	49.3798907882882	0
92.2293245745441	91.9679859507382	91.3100903187101	90.1203335208432	88.1518009316097	84.9621107202597	79.6780631185561	70.2030403336947	49.3185029187359	0
92.2280982012648	91.9660075697703	91.3065903178964	90.114491882896	88.1426515071179	84.9483199159318	79.6573637595599	70.1704319699229	49.2570724834802	0
92.2268455049706	91.96400379059	91.3030664713088	90.1086284947005	88.1334827501134	84.934512074085	79.636648619213	70.1378053019266	49.1955994371578	0
92.2255665481335	91.9619746753511	91.2995188401037	90.1027434143666	88.1242947126614	84.9206872376249	79.6159177284629	70.1051603438989	49.1340837341896	0
92.2242613931462	91.9599202861001	91.2959474852871	90.096836699815	88.1150874466193	84.9068454492575	79.5951711180882	70.0724971098993	49.0725253287805	0
92.2229301023206	91.9578406847757	91.2923524677146	90.0909084087775	88.1058610036378	84.8929867514911	79.5744088187001	70.039815613855	49.0109241749196	0
92.2215727378874	91.9557359332078	91.2887338480912	90.0849585987977	88.0966154351619	84.8791111866369	79.5536308607433	70.0071158695615	48.9492802263811	0
92.220189361995	91.9536060931175	91.2850916869716	90.078987327232	88.0873507924322	84.8652187968109	79.5328372744972	69.9743978906837	48.8875934367237	0
92.2187800367085	91.9514512261161	91.2814260447602	90.07299465125	88.0780671264858	84.8513096239346	79.512028090077	69.9416616907564	48.8258637592912	0
92.2173448240087	91.9492713937051	91.2777369817113	90.066980627835	88.0687644881574	84.8373837097367	79.491203337435	69.9089072831854	48.7640911472126	0
92.2158837857918	91.9470666572751	91.2740245579287	90.060945313785	88.0594429280804	84.8234410957538	79.4703630463614	69.8761346812485	48.7022755534025	0
92.214396983868	91.9448370781057	91.2702888333664	90.054888765713	88.050102496688	84.8094818233319	79.4495072464857	69.8433438980959	48.6404169305609	0
92.2128844799607	91.9425827173649	91.2665298678279	90.0488110400479	88.0407432442142	84.7955059336278	79.4286359672775	69.8105349467514	48.5785152311738	0
92.2113463357061	91.9403036361086	91.2627477209671	90.042712193035	88.0313652206947	84.7815134676097	79.4077492380479	69.7777078401129	48.516570407513	0
92.2097826126518	91.9379998952803	91.258942452288	90.0365922807369	88.0219684759682	84.767504466059	79.3868470879504	69.7448625909534	48.4545824116365	0
92.2081933722565	91.9356715557101	91.2551141211444	90.0304513590334	88.0125530596771	84.7534789695709	79.3659295459819	69.711999211922	48.3925511953886	0
92.2065786758891	91.9333186781151	91.2512627867407	90.0242894836232	88.0031190212688	84.7394370185559	79.3449966409839	69.6791177155442	48.3304767103999	0
92.2049385848275	91.9309413230983	91.2473885081315	90.0181067100236	87.9936664099967	84.725378653241	79.3240484016434	69.646218114223	48.2683589080879	0
92.2032731602586	91.9285395511483	91.2434913442219	90.0119030935717	87.9841952749209	84.7113039136706	79.3030848564941	69.6133004202396	48.2061977396566	0
92.2015824632769	91.926113422639	91.2395713537675	90.0056786894246	87.9747056649096	84.6972128397076	79.2821060339172	69.5803646457544	48.143993156097	0
92.1998665548841	91.9236629978294	91.2356285953746	89.9994335525606	87.9651976286397	84.6831054710347	79.2611119621426	69.5474108028071	48.081745108187	0
92.1981254959881	91.9211883368624	91.2316631275003	89.9931677377791	87.9556712145981	84.6689818471555	79.2401026692498	69.5144389033183	48.0194535464918	0
92.1963593474029	91.9186894997656	91.2276750084522	89.9868812997018	87.9461264710825	84.6548420073955	79.219078183169	69.4814489590897	47.9571184213636	0
92.194568169847	91.9161665464496	91.2236642963893	89.9805742927731	87.9365634462024	84.6406859909031	79.198038531682	69.448440981805	47.8947396829422	0
92.1927520239436	91.9136195367089	91.2196310493215	89.9742467712605	87.9269821878799	84.6265138366509	79.1769837424232	69.4154149830306	47.8323172811549	0
92.1909109702193	91.9110485302205	91.2155753251099	89.9678987892556	87.9173827438512	84.6123255834367	79.1559138428806	69.3823709742162	47.7698511657164	0
92.1890450691039	91.9084535865441	91.2114971814669	89.9615304006745	87.9077651616668	84.5981212698842	79.1348288603966	69.3493089666959	47.7073412861291	0
92.1871543809292	91.9058347651216	91.2073966759563	89.9551416592585	87.898129488693	84.5839009344448	79.1137288221693	69.3162289716886	47.6447875916835	0
92.185238965929	91.9031921252769	91.2032738659937	89.9487326185745	87.8884757721125	84.5696646153978	79.092613755253	69.2831310002986	47.5821900314575	0
92.1832988842381	91.9005257262152	91.1991288088461	89.9423033320158	87.8788040589256	84.5554123508521	79.0714836865595	69.2500150635166	47.5195485543173	0
92.1813341958916	91.8978356270231	91.1949615616326	89.9358538528026	87.8691143959508	84.5411441787469	79.0503386428589	69.2168811722203	47.4568631089169	0
92.1793449608247	91.8951218866681	91.1907721813241	89.9293842339827	87.8594068298261	84.5268601368527	79.0291786507804	69.183729337175	47.3941336436986	0
92.1773312388717	91.8923845639983	91.1865607247439	89.922894528432	87.8496814070094	84.5125602627725	79.0080037368134	69.1505595690343	47.3313601068928	0
92.1752930897657	91.8896237177419	91.1823272485671	89.916384788855	87.8399381737802	84.4982445939424	78.9868139273083	69.1173718783408	47.2685424465179	0
92.1732305731378	91.8868394065073	91.1780718093216	89.9098550677857	87.8301771762394	84.4839131676332	78.9656092484773	69.0841662755268	47.2056806103809	0
92.1711437485168	91.8840316887827	91.1737944633878	89.9033054175879	87.8203984603111	84.4695660209509	78.9443897263957	69.0509427709149	47.1427745460771	0
92.1690326753284	91.8812006229354	91.1694952669987	89.896735890456	87.8106020717432	84.4552031908377	78.923155387002	69.0177013747185	47.07982420099	0
92.1668974128948	91.8783462672123	91.1651742762402	89.8901465384151	87.8007880561081	84.4408247140734	78.9019062560997	68.9844420970428	47.0168295222916	0
92.1647380204343	91.8754686797389	91.1608315470514	89.8835374133224	87.7909564588037	84.4264306272758	78.8806423593575	68.9511649478853	46.9537904569425	0
92.1625545570606	91.8725679185195	91.1564671352243	89.8769085668669	87.7811073250544	84.4120209669019	78.8593637223102	68.9178699371363	46.8907069516917	0
92.1603470817821	91.8696440414368	91.1520810964045	89.8702600505708	87.7712406999116	84.397595769249	78.8380703703602	68.8845570745796	46.8275789530767	0
92.1581156535019	91.8666971062517	91.1476734860911	89.8635919157894	87.7613566282549	84.3831550704553	78.8167623287773	68.8512263698931	46.7644064074235	0
92.155860331017	91.8637271706029	91.1432443596367	89.856904213712	87.7514551547929	84.3686989065011	78.7954396227005	68.8178778326495	46.7011892608469	0
92.1535811730179	91.860734292007	91.1387937722479	89.8501969953625	87.7415363240639	84.3542273132096	78.7741022771381	68.784511472317	46.6379274592501	0
92.1512782380881	91.8577185278579	91.1343217789855	89.8434703115997	87.7316001804367	84.3397403262478	78.752750316969	68.7511272982596	46.574620948325	0
92.1489515847036	91.8546799354271	91.1298284347641	89.8367242131181	87.7216467681116	84.3252379811275	78.7313837669433	68.7177253197378	46.511269673552	0
92.1466012712326	91.851618571863	91.1253137943532	89.8299587504486	87.7116761311211	84.3107203132062	78.7100026516831	68.6843055459096	46.4478735802001	0
92.144227355935	91.8485344941907	91.1207779123765	89.8231739739587	87.7016883133308	84.2961873576877	78.6886069956835	68.6508679858304	46.384432613327	0
92.1418298969618	91.8454277593124	91.1162208433126	89.8163699338531	87.6916833584401	84.2816391496234	78.6671968233131	68.6174126484541	46.3209467177791	0
92.139408952355	91.8422984240065	91.111642641495	89.8095466801746	87.6816613099831	84.2670757239129	78.6457721588149	68.5839395426334	46.2574158381911	0
92.136964580047	91.8391465449278	91.1070433611124	89.8027042628043	87.6716222113294	84.252497115305	78.6243330263071	68.5504486771208	46.1938399189865	0
92.1344968378602	91.8359721786074	91.1024230562088	89.7958427314624	87.6615661056849	84.2379033583986	78.6028794497838	68.5169400605684	46.1302189043771	0
92.1320057835066	91.8327753814523	91.0977817806836	89.7889621357085	87.6514930360925	84.2232944876433	78.5814114531161	68.4834137015292	46.0665527383637	0
92.1294914745875	91.8295562097452	91.0931195882922	89.7820625249424	87.6414030454328	84.2086705373405	78.5599290600522	68.4498696084573	46.002841364735	0
92.1269539685931	91.8263147196448	91.0884365326457	89.7751439484045	87.6312961764252	84.1940315416441	78.5384322942188	68.4163077897085	45.9390847270686	0
92.124393322902	91.8230509671852	91.0837326672113	89.7682064551763	87.6211724716285	84.1793775345615	78.5169211791215	68.382728253541	45.8752827687304	0
92.1218095947811	91.8197650082757	91.0790080453125	89.761250094181	87.6110319734416	84.1647085499544	78.4953957381456	68.3491310081155	45.8114354328747	0
92.119202841385	91.8164568987012	91.0742627201295	89.7542749141843	87.6008747241042	84.1500246215393	78.4738559945568	68.3155160614963	45.7475426624441	0
92.1165731197559	91.8131266941215	91.0694967446991	89.7472809637943	87.5907007656979	84.1353257828887	78.452301971502	68.2818834216516	45.6836044001695	0
92.1139204868229	91.8097744500715	91.064710171915	89.7402682914627	87.5805101401466	84.1206120674318	78.4307336920101	68.2482330964538	45.6196205885701	0
92.1112449994022	91.806400221961	91.059903054528	89.733236945485	87.5703028892172	84.1058835084553	78.4091511789924	68.2145650936803	45.5555911699534	0
92.1085467141964	91.8030040650747	91.0550754451464	89.726186974001	87.560079054521	84.091140139104	78.3875544552436	68.1808794210141	45.4915160864147	0
92.105825687794	91.7995860345717	91.0502273962359	89.7191184249956	87.5498386775134	84.0763819923819	78.3659435434425	68.1471760860438	45.4273952798377	0
92.1030819766699	91.796146185486	91.0453589601202	89.7120313462989	87.5395817994955	84.0616091011529	78.3443184661523	68.1134550962648	45.363228691894	0
92.1003156371842	91.7926845727257	91.0404701889807	89.7049257855872	87.5293084616145	84.0468214981413	78.3226792458221	68.0797164590793	45.2990162640432	0
92.0975267255825	91.7892012510738	91.0355611348573	89.6978017903831	87.5190187048643	84.032019215933	78.3010259047865	68.0459601817968	45.2347579375325	0
92.0947152979953	91.7856962751871	91.0306318496481	89.6906594080562	87.5087125700865	84.017202286976	78.2793584652673	68.0121862716352	45.1704536533971	0
92.0918814104379	91.782169699597	91.02568238511	89.6834986858239	87.4983900979709	84.0023707435811	78.2576769493734	67.9783947357203	45.10610335246	0
92.0890251188103	91.7786215787088	91.0207127928587	89.6763196707514	87.4880513290563	83.9875246179229	78.235981379102	67.9445855810873	45.0417069753316	0
92.0861464788964	91.7750519668021	91.0157231243691	89.6691224097525	87.477696303731	83.9726639420405	78.2142717763389	67.9107588146803	44.9772644624099	0
92.0832455463644	91.7714609180305	91.0107134309752	89.66190694959	87.467325062234	83.9577887478379	78.1925481628595	67.8769144433537	44.9127757538805	0
92.0803223767661	91.7678484864213	91.0056837638709	89.6546733368766	87.456937644655	83.9428990670852	78.1708105603289	67.8430524738722	44.8482407897161	0
92.0773770255368	91.7642147258761	91.0006341741096	89.6474216180746	87.4465340909358	83.9279949314191	78.1490589903034	67.8091729129109	44.7836595096768	0
92.0744095479953	91.7605596901701	90.9955647126048	89.6401518394974	87.4361144408704	83.9130763723434	78.1272934742301	67.7752757670568	44.7190318533097	0
92.0714199993431	91.7568834329523	90.9904754301304	89.6328640473091	87.4256787341061	83.8981434212305	78.1055140334484	67.7413610428081	44.6543577599493	0
92.0684084346649	91.7531860077457	90.9853663773205	89.6255582875257	87.4152270101439	83.883196109321	78.0837206891902	67.7074287465755	44.5896371687165	0
92.0653749089278	91.7494674679468	90.9802376046702	89.6182346060151	87.4047593083392	83.8682344677254	78.0619134625807	67.6734788846822	44.5248700185195	0
92.0623194769817	91.7457278668259	90.9750891625354	89.6108930484978	87.3942756679028	83.8532585274241	78.0400923746387	67.6395114633646	44.460056248053	0
92.0592421935583	91.7419672575271	90.9699211011331	89.6035336605477	87.3837761279009	83.8382683192687	78.0182574462776	67.6055264887724	44.3951957957983	0
92.0561431132717	91.7381856930681	90.9647334705421	89.5961564875919	87.3732607272566	83.8232638739821	77.9964086983059	67.5715239669695	44.3302886000231	0
92.0530222906178	91.73438322634	90.9595263207024	89.5887615749118	87.3627295047497	83.8082452221596	77.9745461514278	67.5375039039342	44.2653345987817	0
92.0498797799742	91.7305599101079	90.9542997014163	89.5813489676434	87.3521824990182	83.7932123942694	77.9526698262434	67.5034663055593	44.2003337299145	0
92.0467156356	91.7267157970103	90.9490536623481	89.5739187107776	87.3416197485581	83.7781654206534	77.9307797432501	67.4694111776534	44.1352859310478	0
92.0435299116357	91.7228509395595	90.9437882530244	89.5664708491612	87.3310412917248	83.7631043315278	77.9088759228425	67.4353385259402	44.0701911395941	0
92.0403226621031	91.7189653901411	90.9385035228347	89.5590054274966	87.3204471667331	83.7480291569836	77.8869583853131	67.40124835606	44.0050492927517	0
92.037093940905	91.7150592010147	90.9331995210312	89.5515224903431	87.3098374116583	83.7329399269876	77.8650271508532	67.3671406735692	43.9398603275046	0
92.0338438018251	91.7111324243133	90.9278762967294	89.5440220821168	87.2992120644366	83.7178366713828	77.8430822395532	67.3330154839414	43.8746241806222	0
92.030572298528	91.7071851120435	90.922533898908	89.5365042470913	87.2885711628657	83.7027194198891	77.8211236714033	67.2988727925673	43.8093407886596	0
92.0272794845588	91.7032173160858	90.9171723764094	89.5289690293982	87.2779147446058	83.6875882021042	77.7991514662937	67.2647126047557	43.7440100879568	0
92.0239654133432	91.6992290881942	90.9117917779401	89.5214164730277	87.2672428471795	83.6724430475036	77.7771656440159	67.2305349257331	43.6786320146392	0
92.0206301381874	91.6952204799964	90.9063921520705	89.5138466218286	87.2565555079732	83.657283985442	77.7551662242625	67.1963397606447	43.6132065046171	0
92.0172737122778	91.6911915429939	90.9009735472356	89.5062595195093	87.2458527642371	83.6421110451534	77.7331532266281	67.1621271145549	43.5477334935856	0
92.0138961886808	91.6871423285619	90.8955360117347	89.4986552096381	87.2351346530861	83.6269242557521	77.7111266706099	67.1278969924469	43.4822129170243	0
92.0104976203432	91.6830728879494	90.8900795937326	89.4910337356435	87.2244012115004	83.611723646233	77.6890865756081	67.093649399224	43.4166447101975	0
92.0070780600915	91.6789832722792	90.8846043412587	89.4833951408149	87.213652476326	83.5965092454723	77.6670329609264	67.0593843397094	43.3510288081538	0
92.0036375606322	91.6748735325481	90.8791103022081	89.4757394683027	87.2028884842755	83.5812810822283	77.6449658457728	67.0251018186469	43.2853651457259	0
92.0001761745517	91.6707437196268	90.8735975243415	89.4680667611195	87.1921092719283	83.5660391851418	77.6228852492599	66.9908018407009	43.2196536575306	0
91.9966939543158	91.6665938842598	90.8680660552857	89.4603770621397	87.1813148757316	83.5507835827368	77.6007911904052	66.9564844104573	43.1538942779685	0
91.9931909522701	91.6624240770659	90.8625159425336	89.4526704141005	87.1705053320006	83.5355143034209	77.5786836881323	66.9221495324233	43.0880869412237	0
91.9896672206397	91.6582343485375	90.8569472334444	89.4449468596022	87.1596806769195	83.5202313754865	77.5565627612707	66.8877972110284	43.022231581264	0
91.9861228115293	91.6540247490418	90.8513599752442	89.4372064411085	87.1488409465417	83.5049348271105	77.5344284285568	66.8534274506239	42.9563281318405	0
91.9825577769228	91.6497953288196	90.8457542150261	89.4294492009474	87.1379861767907	83.4896246863556	77.5122807086341	66.8190402554844	42.8903765264873	0
91.9789721686835	91.6455461379863	90.8401299997504	89.4216751813113	87.1271164034604	83.4743009811705	77.4901196200538	66.7846356298069	42.8243766985216	0
91.9753660385541	91.6412772265316	90.834487376245	89.4138844242572	87.1162316622157	83.4589637393908	77.4679451812756	66.7502135777122	42.7583285810434	0
91.9717394381564	91.6369886443194	90.8288263912053	89.4060769717079	87.1053319885933	83.4436129887393	77.4457574106676	66.7157741032447	42.692232106935	0
91.9680924189915	91.6326804410883	90.8231470911951	89.3982528654518	87.0944174180018	83.4282487568264	77.4235563265073	66.6813172103729	42.6260872088614	0
91.9644250324396	91.6283526664514	90.8174495226464	89.3904121471436	87.083487985723	83.4128710711513	77.4013419469818	66.6468429029896	42.5598938192698	0
91.9607373297599	91.6240053698964	90.8117337318596	89.3825548583048	87.0725437269115	83.397479959102	77.3791142901884	66.6123511849126	42.4936518703893	0
91.957029362091	91.6196386007858	90.8059997650041	89.3746810403238	87.061584676596	83.382075447956	77.3568733741352	66.5778420598845	42.4273612942308	0
91.9533011804502	91.6152524083567	90.8002476681184	89.366790734457	87.0506108696797	83.3666575648809	77.3346192167413	66.5433155315737	42.361022022587	0
91.9495528357339	91.6108468417214	90.7944774871105	89.3588839818284	87.0396223409404	83.3512263369351	77.3123518358374	66.508771603574	42.294633987032	0
91.9457843787177	91.606421949867	90.7886892677577	89.3509608234307	87.0286191250316	83.3357817910678	77.2900712491665	66.4742102794056	42.2281971189209	0
91.9419958600561	91.6019777816558	90.7828830557075	89.3430213001256	87.0176012564828	83.3203239541204	77.2677774743838	66.4396315625148	42.1617113493903	0
91.9381873302823	91.5975143858251	90.7770588964777	89.3350654526439	87.0065687696999	83.3048528528262	77.2454705290579	66.405035456275	42.0951766093571	0
91.9343588398089	91.5930318109877	90.7712168354562	89.3270933215864	86.995521698966	83.2893685138115	77.2231504306705	66.3704219639865	42.0285928295192	0
91.9305104389271	91.5885301056316	90.7653569179019	89.3191049474239	86.9844600784417	83.2738709635958	77.2008171966175	66.335791088877	41.9619599403549	0
91.9266421778073	91.5840093181205	90.7594791889447	89.3111003704981	86.9733839421658	83.2583602285925	77.1784708442091	66.3011428341018	41.8952778721225	0
91.9227541064989	91.5794694966935	90.7535836935855	89.3030796310215	86.9622933240556	83.2428363351093	77.1561113906702	66.2664772027444	41.8285465548606	0
91.91884627493	91.5749106894656	90.7476704766972	89.2950427690782	86.9511882579076	83.227299309349	77.1337388531412	66.2317941978166	41.7617659183874	0
91.9149187329079	91.5703329444275	90.7417395830242	89.2869898246242	86.940068777398	83.2117491774095	77.1113532486779	66.1970938222586	41.6949358923007	0
91.9109715301189	91.565736309446	90.7357910571831	89.2789208374879	86.9289349160832	83.1961859652848	77.0889545942526	66.1623760789399	41.6280564059778	0
91.9070047161282	91.5611208322638	90.7298249436629	89.2708358473704	86.9177867074	83.1806096988654	77.0665429067539	66.127640970659	41.5611273885749	0
91.9030183403802	91.5564865604998	90.7238412868251	89.262734893846	86.9066241846668	83.1650204039386	77.0441182029875	66.092888500144	41.4941487690274	0
91.8990124521982	91.5518335416493	90.7178401309044	89.2546180163626	86.8954473810834	83.149418106189	77.0216804996766	66.0581186700528	41.4271204760493	0
91.8949871007848	91.5471618230841	90.7118215200084	89.2464852542421	86.8842563297317	83.1338028311993	76.9992298134622	66.0233314829735	41.3600424381331	0
91.8909423352215	91.5424714520524	90.7057854981183	89.2383366466809	86.8730510635766	83.1181746044507	76.9767661609035	65.9885269414246	41.2929145835497	0
91.8868782044692	91.5377624756791	90.6997321090893	89.2301722327501	86.8618316154658	83.1025334513232	76.9542895584785	65.9537050478553	41.2257368403477	0
91.8827947573679	91.5330349409662	90.6936613966501	89.2219920513962	86.8505980181309	83.086879397096	76.9318000225844	65.9188658046458	41.1585091363541	0
91.8786920426368	91.5282888947923	90.6875734044043	89.2137961414413	86.8393503041876	83.0712124669485	76.9092975695377	65.8840092141075	41.0912313991729	0
91.8745701088744	91.5235243839133	90.6814681758296	89.2055845415836	86.828088506136	83.0555326859602	76.8867822155751	65.8491352784836	41.0239035561858	0
91.8704290045588	91.5187414549624	90.6753457542788	89.1973572903978	86.8168126563617	83.0398400791117	76.8642539768533	65.8142439999489	40.9565255345517	0
91.8662687780472	91.51394015445	90.6692061829798	89.1891144263355	86.8055227871354	83.0241346712847	76.8417128694501	65.7793353806105	40.8890972612062	0
91.8620894775765	91.5091205287642	90.6630495050359	89.1808559877254	86.7942189306143	83.0084164872626	76.8191589093642	65.7444094225078	40.8216186628618	0
91.8578911512628	91.5042826241707	90.6568757634262	89.1725820127743	86.7829011188418	82.9926855517312	76.7965921125159	65.7094661276129	40.7540896660073	0
91.8536738471021	91.499426486813	90.6506850010057	89.1642925395666	86.7715693837485	82.9769418892791	76.7740124947474	65.6745054978307	40.6865101969078	0
91.84943761297	91.4945521627126	90.6444772605056	89.1559876060657	86.7602237571523	82.9611855243978	76.7514200718234	65.6395275349996	40.6188801816043	0
91.8451824966217	91.4896596977691	90.6382525845336	89.1476672501136	86.7488642707592	82.9454164814825	76.728814859431	65.6045322408913	40.5511995459137	0
91.8409085456923	91.4847491377604	90.6320110155745	89.1393315094315	86.7374909561633	82.9296347848327	76.7061968731806	65.5695196172113	40.4834682154283	0
91.8366158076967	91.4798205283428	90.6257525959899	89.1309804216207	86.7261038448479	82.9138404586522	76.683566128606	65.5344896655989	40.4156861155157	0
91.8323043300297	91.4748739150513	90.6194773680188	89.1226140241621	86.7147029681854	82.8980335270497	76.6609226411649	65.4994423876279	40.3478531713186	0
91.8279741599663	91.4699093432995	90.6131853737782	89.1142323544175	86.7032883574379	82.8822140140396	76.6382664262391	65.4643777848065	40.2799693077544	0
91.8236253446614	91.46492685838	90.6068766552625	89.1058354496293	86.6918600437579	82.8663819435419	76.6155974991352	65.4292958585777	40.2120344495151	0
91.8192579311503	91.4599265054643	90.6005512543447	89.0974233469212	86.6804180581883	82.850537339383	76.5929158750846	65.3941966103197	40.1440485210672	0
91.8148719663483	91.4549083296035	90.5942092127762	89.0889960832988	86.6689624316632	82.8346802252961	76.5702215692442	65.3590800413455	40.076011446651	0
91.8104674970515	91.4498723757277	90.5878505721871	89.0805536956492	86.6574931950085	82.8188106249215	76.5475145966963	65.3239461529042	40.0079231502808	0
91.8060445699361	91.4448186886468	90.5814753740868	89.0720962207426	86.6460103789416	82.802928561807	76.5247949724496	65.2887949461801	39.9397835557445	0
91.801603231559	91.4397473130503	90.5750836598638	89.0636236952313	86.6345140140726	82.7870340594086	76.5020627114391	65.2536264222941	39.8715925866033	0
91.7971435283578	91.4346582935078	90.5686754707862	89.0551361556514	86.6230041309045	82.7711271410906	76.4793178285264	65.2184405823028	39.8033501661916	0
91.7926655066507	91.4295516744689	90.5622508480022	89.0466336384223	86.6114807598335	82.7552078301264	76.4565603385006	65.1832374271998	39.7350562176166	0
91.7881692126371	91.4244275002632	90.5558098325401	89.0381161798472	86.5999439311494	82.7392761496984	76.4337902560779	65.1480169579149	39.666710663758	0
91.783654692397	91.4192858151012	90.5493524653086	89.0295838161138	86.5883936750364	82.7233321228988	76.4110075959026	65.1127791753154	39.5983134272683	0
91.7791219918918	91.4141266630736	90.5428787870973	89.0210365832947	86.576830021573	82.7073757727299	76.3882123725472	65.0775240802053	39.5298644305716	0
91.7745711569639	91.4089500881521	90.5363888385767	89.0124745173471	86.565253000733	82.6914071221048	76.3654046005124	65.0422516733265	39.4613635958642	0
91.7700022333371	91.4037561341893	90.5298826602985	89.0038976541141	86.5536626423852	82.6754261938471	76.3425842942282	65.0069619553584	39.3928108451141	0
91.7654152666165	91.398544844919	90.5233602926964	88.9953060293244	86.5420589762947	82.659433010692	76.3197514680535	64.971654926918	39.3242061000604	0
91.7608103022891	91.3933162639562	90.5168217760856	88.9866996785929	86.5304420321225	82.6434275952864	76.2969061362768	64.9363305885609	39.2555492822137	0
91.7561873857231	91.3880704347975	90.5102671506636	88.9780786374211	86.5188118394263	82.6274099701893	76.2740483131166	64.9009889407807	39.1868403128553	0
91.7515465621689	91.3828074008213	90.5036964565103	88.9694429411975	86.5071684276612	82.6113801578723	76.2511780127215	64.8656299840098	39.1180791130371	0
91.7468878767585	91.3775272052876	90.4971097335883	88.9607926251979	86.4955118261794	82.5953381807198	76.2282952491707	64.8302537186191	39.0492656035816	0
91.7422113745062	91.3722298913389	90.4905070217433	88.9521277245857	86.4838420642311	82.5792840610297	76.2054000364742	64.7948601449189	38.9803997050813	0
91.7375171003083	91.3669155019996	90.4838883607043	88.9434482744123	86.4721591709648	82.5632178210135	76.1824923885732	64.7594492631583	38.9114813378986	0
91.7328050989435	91.3615840801766	90.4772537900838	88.9347543096176	86.4604631754279	82.5471394827967	76.1595723193406	64.7240210735262	38.8425104221659	0
91.7280754150729	91.3562356686596	90.470603349378	88.9260458650303	86.4487541065667	82.5310490684196	76.1366398425808	64.6885755761511	38.7734868777845	0
91.7233280932402	91.350870310121	90.4639370779674	88.917322975368	86.4370319932269	82.5149465998371	76.1136949720306	64.6531127711011	38.7044106244252	0
91.7185631778718	91.3454880471164	90.4572550151171	88.9085856752381	86.4252968641543	82.4988320989193	76.0907377213593	64.6176326583846	38.6352815815278	0
91.7137807132769	91.3400889220845	90.4505571999764	88.8998339991375	86.413548747995	82.4827055874522	76.0677681041687	64.5821352379504	38.5660996683005	0
91.7089807436477	91.3346729773473	90.4438436715801	88.8910679814535	86.4017876732955	82.4665670871375	76.0447861339941	64.5466205096875	38.4968648037201	0
91.7041633130597	91.3292402551107	90.4371144688478	88.882287656464	86.3900136685038	82.4504166195935	76.0217918243038	64.5110884734257	38.4275769065316	0
91.6993284654715	91.3237907974643	90.430369630585	88.8734930583377	86.3782267619689	82.4342542063551	75.9987851885001	64.475539128936	38.3582358952479	0
91.6944762447253	91.3183246463816	90.4236091954828	88.8646842211346	86.366426981942	82.4180798688742	75.9757662399191	64.43997247593	38.2888416881495	0
91.6896066945466	91.3128418437206	90.4168332021184	88.8558611788062	86.3546143565764	82.4018936285205	75.9527349918315	64.4043885140611	38.2193942032846	0
91.6847198585448	91.3073424312234	90.4100416889556	88.8470239651962	86.3427889139279	82.3856955065811	75.9296914574424	64.3687872429238	38.1498933584684	0
91.6798157802133	91.3018264505169	90.4032346943446	88.8381726140404	86.3309506819555	82.3694855242617	75.9066356498918	64.3331686620545	38.0803390712831	0
91.6748945029294	91.2962939431129	90.3964122565228	88.8293071589673	86.3190996885215	82.3532637026863	75.8835675822551	64.2975327709316	38.0107312590776	0
91.6699560699545	91.2907449504081	90.3895744136144	88.8204276334985	86.3072359613917	82.337030062898	75.860487267543	64.2618795689753	37.9410698389674	0
91.6650005244346	91.2851795136845	90.3827212036315	88.8115340710488	86.2953595282363	82.3207846258588	75.8373947187022	64.2262090555484	37.8713547278341	0
91.6600279093998	91.2795976741095	90.3758526644739	88.8026265049269	86.28347041663	82.3045274124507	75.8142899486153	64.190521229956	37.8015858423254	0
91.6550382677654	91.2739994727362	90.3689688339293	88.7937049683354	86.2715686540522	82.2882584434754	75.7911729701015	64.1548160914459	37.7317630988545	0
91.650031642331	91.2683849505036	90.3620697496739	88.7847694943713	86.2596542678875	82.271977739655	75.7680437959164	64.1190936392087	37.6618864136005	0
91.6450080757816	91.2627541482368	90.3551554492725	88.7758201160264	86.2477272854262	82.2556853216324	75.7449024387528	64.0833538723782	37.5919557025074	0
91.6399676106872	91.257107106647	90.3482259701788	88.7668568661873	86.2357877338645	82.2393812099712	75.7217489112406	64.0475967900312	37.5219708812845	0
91.634910289503	91.251443866332	90.3412813497356	88.7578797776364	86.223835640305	82.2230654251565	75.6985832259474	64.0118223911882	37.4519318654058	0
91.6298361545699	91.2457644677764	90.3343216251752	88.7488888830515	86.2118710317568	82.2067379875951	75.6754053953782	63.976030674813	37.3818385701098	0
91.6247452481143	91.2400689513516	90.3273468336196	88.7398842150066	86.1998939351362	82.1903989176157	75.6522154319765	63.9402216398133	37.3116909103995	0
91.6196376122486	91.2343573573162	90.320357012081	88.7308658059722	86.1879043772668	82.1740482354694	75.629013348124	63.9043952850408	37.2414888010417	0
91.614513288971	91.2286297258161	90.3133521974616	88.7218336883154	86.1759023848799	82.15768596133	75.6057991561409	63.8685516092913	37.1712321565673	0
91.6093723201661	91.2228860968848	90.3063324265545	88.7127878943003	86.163887984615	82.1413121152942	75.5825728682864	63.8326906113048	37.1009208912707	0
91.6042147476046	91.2171265104436	90.2992977360433	88.7037284560887	86.1518612030201	82.1249267173821	75.559334496759	63.7968122897659	37.0305549192099	0
91.599040612944	91.2113510063016	90.2922481625031	88.69465540574	86.1398220665517	82.1085297875376	75.5360840536964	63.7609166433039	36.9601341542057	0
91.5938499577282	91.2055596241565	90.2851837424	88.6855687752113	86.1277706015757	82.0921213456283	75.5128215511761	63.7250036704928	36.8896585098422	0
91.5886428233883	91.199752403594	90.2781045120921	88.6764685963588	86.1157068343675	82.0757014114463	75.4895470012155	63.6890733698516	36.819127899466	0
91.5834192512422	91.1939293840887	90.2710105078294	88.6673549009367	86.1036307911121	82.0592700047082	75.4662604157724	63.6531257398446	36.7485422361862	0
91.5781792824953	91.1880906050041	90.263901765754	88.6582277205987	86.0915424979049	82.0428271450557	75.4429618067448	63.6171607788813	36.6779014328743	0
91.5729229582402	91.1822361055927	90.2567783219007	88.6490870868977	86.0794419807516	82.0263728520556	75.4196511859718	63.5811784853167	36.6072054021637	0
91.5676503194572	91.1763659249962	90.2496402121969	88.6399330312863	86.0673292655691	82.0099071452004	75.3963285652333	63.5451788574517	36.5364540564496	0
91.5623614070145	91.170480102246	90.2424874724631	88.6307655851172	86.055204378185	81.9934300439084	75.3729939562504	63.5091618935327	36.4656473078889	0
91.557056261668	91.1645786762632	90.2353201384134	88.6215847796433	86.0430673443389	81.9769415675241	75.3496473706857	63.4731275917524	36.3947850684	0
91.5517349240621	91.1586616858589	90.2281382456551	88.6123906460181	86.0309181896819	81.9604417353186	75.3262888201439	63.4370759502494	36.3238672496621	0
91.5463974347295	91.1527291697343	90.2209418296898	88.6031832152963	86.0187569397773	81.9439305664897	75.3029183161714	63.4010069671088	36.2528937631156	0
91.5410438340911	91.146781166481	90.2137309259129	88.5939625184336	86.0065836201013	81.9274080801623	75.2795358702568	63.3649206403621	36.1818645199618	0
91.535674162457	91.1408177145815	90.2065055696144	88.5847285862876	85.9943982560424	81.9108742953888	75.2561414938315	63.3288169679875	36.1107794311622	0
91.5302884600259	91.1348388524089	90.1992657959791	88.5754814496176	85.9822008729026	81.8943292311493	75.2327351982696	63.2926959479098	36.0396384074388	0
91.5248867668859	91.1288446182274	90.1920116400867	88.5662211390851	85.9699914958974	81.877772906352	75.209316994888	63.2565575780011	35.9684413592738	0
91.5194691230142	91.1228350501927	90.1847431369121	88.5569476852544	85.957770150156	81.8612053398333	75.185886894947	63.2204018560804	35.8971881969092	0
91.5140355682775	91.1168101863519	90.1774603213259	88.5476611185924	85.9455368607217	81.8446265503581	75.1624449096504	63.1842287799137	35.8258788303467	0
91.5085861424323	91.1107700646439	90.1701632280943	88.5383614694692	85.9332916525524	81.8280365566206	75.1389910501457	63.148038347215	35.7545131693477	0
91.503120885125	91.1047147228995	90.1628518918797	88.5290487681585	85.9210345505207	81.8114353772439	75.1155253275244	63.1118305556454	35.6830911234326	0
91.4976398358922	91.098644198842	90.1555263472409	88.5197230448376	85.9087655794142	81.7948230307805	75.0920477528221	63.0756054028138	35.6116126018814	0
91.4921430341604	91.0925585300869	90.1481866286332	88.5103843295881	85.8964847639362	81.7781995357131	75.068558337019	63.0393628862771	35.5400775137326	0
91.486630519247	91.0864577541424	90.1408327704089	88.5010326523958	85.8841921287053	81.761564910454	75.0450570910399	63.0031030035402	35.4684857677837	0
91.48110233036	91.0803419084097	90.1334648068173	88.4916680431514	85.8718876982565	81.7449191733462	75.0215440257544	62.9668257520559	35.3968372725907	0
91.4755585065983	91.074211030183	90.1260827720054	88.4822905316503	85.859571497041	81.7282623426632	74.9980191519775	62.9305311292256	35.325131936468	0
91.4699990869516	91.06806515665	90.1186867000176	88.4729001475936	85.8472435494265	81.7115944366094	74.9744824804694	62.894219132399	35.2533696674882	0
91.4644241103014	91.061904324892	90.1112766247966	88.4634969205876	85.834903879698	81.6949154733205	74.9509340219358	62.8578897588745	35.1815503734819	0
91.4588336154203	91.0557285718839	90.1038525801831	88.4540808801449	85.8225525120575	81.6782254708635	74.9273737870284	62.821543005899	35.1096739620377	0
91.4532276409728	91.049537934495	90.0964145999164	88.4446520556839	85.8101894706246	81.6615244472375	74.9038017863449	62.7851788706686	35.0377403405015	0
91.4476062255152	91.0433324494886	90.0889627176345	88.43521047653	85.7978147794368	81.6448124203733	74.8802180304292	62.7487973503281	34.9657494159772	0
91.441969407496	91.0371121535226	90.0814969668747	88.4257561719149	85.7854284624499	81.6280894081342	74.8566225297718	62.7123984419718	34.8937010953258	0
91.436317225256	91.0308770831496	90.0740173810732	88.4162891709778	85.7730305435379	81.611355428316	74.83301529481	62.6759821426428	34.8215952851654	0
91.4306497170285	91.0246272748174	90.0665239935663	88.406809502765	85.7606210464939	81.5946104986474	74.8093963359277	62.6395484493342	34.7494318918713	0
91.4249669209396	91.0183627648686	90.0590168375898	88.3973171962308	85.7481999950299	81.5778546367903	74.7857656634563	62.6030973589882	34.6772108215755	0
91.4192688750081	91.0120835895415	90.0514959462797	88.3878122802371	85.7357674127772	81.5610878603398	74.7621232876744	62.566628868497	34.6049319801669	0
91.4135556171464	91.0057897849702	90.0439613526723	88.3782947835544	85.7233233232868	81.5443101868249	74.7384692188083	62.5301429747025	34.5325952732909	0
91.4078271851598	90.9994813871845	90.0364130897049	88.3687647348617	85.7108677500297	81.5275216337084	74.7148034670319	62.4936396743966	34.4602006063493	0
91.4020836167474	90.9931584321102	90.0288511902153	88.3592221627467	85.6984007163973	81.5107222183873	74.6911260424675	62.4571189643213	34.3877478845001	0
91.3963249495021	90.9868209555697	90.0212756869428	88.3496670957065	85.6859222457012	81.4939119581931	74.6674369551851	62.4205808411688	34.3152370126576	0
91.3905512209106	90.9804689932821	90.0136866125278	88.3400995621475	85.6734323611741	81.4770908703919	74.6437362152036	62.3840253015817	34.242667895492	0
91.3847624683541	90.9741025808629	90.0060839995129	88.3305195903857	85.6609310859696	81.460258972185	74.6200238324904	62.347452342153	34.1700404374295	0
91.378958729108	90.9677217538251	89.9984678803423	88.3209272086474	85.6484184431629	81.4434162807088	74.5962998169616	62.3108619594266	34.0973545426517	0
91.3731400403423	90.9613265475788	89.9908382873626	88.3113224450691	85.6358944557507	81.4265628130351	74.5725641784827	62.2742541498969	34.0246101150963	0
91.3673064391219	90.9549169974316	89.9831952528228	88.3017053276976	85.6233591466518	81.4096985861716	74.5488169268681	62.2376289100091	33.9518070584563	0
91.3614579624069	90.948493138589	89.9755388088747	88.2920758844911	85.6108125387072	81.3928236170621	74.5250580718819	62.2009862361597	33.8789452761799	0
91.3555946470523	90.9420550061543	89.9678689875733	88.2824341433184	85.5982546546804	81.3759379225863	74.5012876232379	62.1643261246961	33.8060246714709	0
91.3497165298091	90.9356026351293	89.9601858208768	88.2727801319601	85.5856855172578	81.3590415195608	74.4775055905997	62.127648571917	33.733045147288	0
91.3438236473235	90.929136060414	89.9524893406467	88.2631138781083	85.5731051490487	81.3421344247386	74.4537119835809	62.0909535740725	33.6600066063453	0
91.3379160361378	90.9226553168073	89.9447795786487	88.2534354093674	85.560513572586	81.3252166548101	74.4299068117456	62.0542411273643	33.5869089511115	0
91.3319937326906	90.9161604390069	89.9370565665525	88.2437447532536	85.5479108103261	81.3082882264027	74.4060900846082	62.0175112279454	33.5137520838104	0
91.3260567733167	90.9096514616098	89.9293203359318	88.2340419371961	85.5352968846493	81.2913491560812	74.3822618116338	61.9807638719209	33.4405359064206	0
91.3201051942472	90.9031284191122	89.9215709182654	88.2243269885367	85.5226718178601	81.2743994603485	74.3584220022386	61.9439990553477	33.3672603206753	0
91.3141390316105	90.8965913459102	89.9138083449366	88.2145999345302	85.5100356321875	81.2574391556451	74.3345706657895	61.9072167742343	33.2939252280624	0
91.3081583214316	90.8900402762996	89.9060326472339	88.2048608023451	85.4973883497853	81.24046825835	74.310707811605	61.8704170245419	33.2205305298243	0
91.2901292643529	90.8703034304771	89.8826271193501	88.175571207107	85.4593801426141	81.1894921737822	74.2390502350954	61.7599129228825	32.9999878101004	0
