# Supplementary material for: A model of aerosol evaporation kinetics in a thermodenuder
Source: Copernicus journal article supplement (doi:10.5194/amt-3-579-2010), 2010-05-11
Supplement: Supplementary file 1 [file amt-3-579-2010-supplement.zip › Figure 6b Data.txt]

Distance
0
0.0523885021010821
0.104777004202164
0.157165506303246
0.209554008404328
0.26194251050541
0.314331012606492
0.366719514707574
0.419108016808657
0.471496518909739
0.523885021010821
0.576273523111903
0.628662025212985
0.681050527314067
0.733439029415149
0.785827531516231
0.838216033617313
0.890604535718395
0.942993037819477
0.995381539920559
1.04777004202164
1.10015854412272
1.15254704622381
1.20493554832489
1.25732405042597
1.30971255252705
1.36210105462813
1.41448955672922
1.4668780588303
1.51926656093138
1.57165506303246
1.62404356513354
1.67643206723463
1.72882056933571
1.78120907143679
1.83359757353787
1.88598607563895
1.93837457774004
1.99076307984112
2.0431515819422
2.09554008404328
2.14792858614436
2.20031708824545
2.25270559034653
2.30509409244761
2.35748259454869
2.40987109664978
2.46225959875086
2.51464810085194
2.56703660295302
2.6194251050541
2.67181360715519
2.72420210925627
2.77659061135735
2.82897911345843
2.88136761555951
2.9337561176606
2.98614461976168
3.03853312186276
3.09092162396384
3.14331012606492
3.19569862816601
3.24808713026709
3.30047563236817
3.35286413446925
3.40525263657033
3.45764113867142
3.5100296407725
3.56241814287358
3.61480664497466
3.66719514707574
3.71958364917683
3.77197215127791
3.82436065337899
3.87674915548007
3.92913765758115
3.98152615968224
4.03391466178332
4.0863031638844
4.13869166598548
4.19108016808657
4.24346867018765
4.29585717228873
4.34824567438981
4.40063417649089
4.45302267859198
4.50541118069306
4.55779968279414
4.61018818489522
4.6625766869963
4.71496518909739
4.76735369119847
4.81974219329955
4.87213069540063
4.92451919750171
4.9769076996028
5.02929620170388
5.08168470380496
5.13407320590604
5.18646170800712
5.23885021010821
5.29123871220929
5.34362721431037
5.39601571641145
5.44840421851254
5.50079272061362
5.5531812227147
5.60556972481578
5.65795822691686
5.71034672901795
5.76273523111903
5.81512373322011
5.86751223532119
5.91990073742227
5.97228923952336
6.02467774162444
6.07706624372552
6.1294547458266
6.18184324792768
6.23423175002877
6.28662025212985
6.33900875423093
6.39139725633201
6.44378575843309
6.49617426053418
6.54856276263526
6.60095126473634
6.65333976683742
6.7057282689385
6.75811677103959
6.81050527314067
6.86289377524175
6.91528227734283
6.96767077944391
7.020059281545
7.07244778364608
7.12483628574716
7.17722478784824
7.22961328994933
7.28200179205041
7.33439029415149
7.38677879625257
7.43916729835365
7.49155580045474
7.54394430255582
7.5963328046569
7.64872130675798
7.70110980885906
7.75349831096015
7.80588681306123
7.85827531516231
7.91066381726339
7.96305231936447
8.01544082146556
8.06782932356664
8.12021782566772
8.1726063277688
8.22499482986989
8.27738333197097
8.32977183407205
8.38216033617313
8.43454883827421
8.4869373403753
8.53932584247638
8.59171434457746
8.64410284667854
8.69649134877962
8.74887985088071
8.80126835298179
8.85365685508287
8.90604535718395
8.95843385928503
9.01082236138611
9.0632108634872
9.11559936558828
9.16798786768936
9.22037636979044
9.27276487189152
9.32515337399261
9.37754187609369
9.42993037819477
9.48231888029585
9.53470738239694
9.58709588449802
9.6394843865991
9.69187288870018
9.74426139080126
9.79664989290235
9.84903839500343
9.90142689710451
9.95381539920559
10.0062039013067
10.0585924034078
10.1109809055088
10.1633694076099
10.215757909711
10.2681464118121
10.3205349139132
10.3729234160142
10.4253119181153
10.4777004202164
10.5300889223175
10.5824774244186
10.6348659265197
10.6872544286207
10.7396429307218
10.7920314328229
10.844419934924
10.8968084370251
10.9491969391262
11.0015854412272
11.0539739433283
11.1063624454294
11.1587509475305
11.2111394496316
11.2635279517326
11.3159164538337
11.3683049559348
11.4206934580359
11.473081960137
11.5254704622381
11.5778589643391
11.6302474664402
11.6826359685413
11.7350244706424
11.7874129727435
11.8398014748445
11.8921899769456
11.9445784790467
11.9969669811478
12.0493554832489
12.10174398535
12.154132487451
12.2065209895521
12.2589094916532
12.3112979937543
12.3636864958554
12.4160749979564
12.4684635000575
12.5208520021586
12.5732405042597
12.6256290063608
12.6780175084619
12.7304060105629
12.782794512664
12.8351830147651
12.8875715168662
12.9399600189673
12.9923485210684
13.0447370231694
13.0971255252705
13.1495140273716
13.2019025294727
13.2542910315738
13.3066795336748
13.3590680357759
13.411456537877
13.4638450399781
13.5162335420792
13.5686220441803
13.6210105462813
13.6733990483824
13.7257875504835
13.7781760525846
13.8305645546857
13.8829530567867
13.9353415588878
13.9877300609889
14.04011856309
14.0925070651911
14.1448955672922
14.1972840693932
14.2496725714943
14.3020610735954
14.3544495756965
14.4068380777976
14.4592265798987
14.5116150819997
14.5640035841008
14.6163920862019
14.668780588303
14.7211690904041
14.7735575925051
14.8259460946062
14.8783345967073
14.9307230988084
14.9831116009095
15.0355001030106
15.0878886051116
15.1402771072127
15.1926656093138
15.2450541114149
15.297442613516
15.349831115617
15.4022196177181
15.4546081198192
15.5069966219203
15.5593851240214
15.6117736261225
15.6641621282235
15.7165506303246
15.7689391324257
15.8213276345268
15.8737161366279
15.9261046387289
15.97849314083
16.0308816429311
16.0832701450322
16.1356586471333
16.1880471492344
16.2404356513354
16.2928241534365
16.3452126555376
16.3976011576387
16.4499896597398
16.5023781618408
16.5547666639419
16.607155166043
16.6595436681441
16.7119321702452
16.7643206723463
16.8167091744473
16.8690976765484
16.9214861786495
16.9738746807506
17.0262631828517
17.0786516849528
17.1310401870538
17.1834286891549
17.235817191256
17.2882056933571
17.3405941954582
17.3929826975592
17.4453711996603
17.4977597017614
17.5501482038625
17.6025367059636
17.6549252080647
17.7073137101657
17.7597022122668
17.8120907143679
17.864479216469
17.9168677185701
17.9692562206711
18.0216447227722
18.0740332248733
18.1264217269744
18.1788102290755
18.2311987311766
18.2835872332776
18.3359757353787
18.3883642374798
18.4407527395809
18.493141241682
18.545529743783
18.5979182458841
18.6503067479852
18.7026952500863
18.7550837521874
18.8074722542885
18.8598607563895
18.9122492584906
18.9646377605917
19.0170262626928
19.0694147647939
19.121803266895
19.174191768996
19.2265802710971
19.2789687731982
19.3313572752993
19.3837457774004
19.4361342795014
19.4885227816025
19.5409112837036
19.5932997858047
19.6456882879058
19.6980767900069
19.7504652921079
19.802853794209
19.8552422963101
19.9076307984112
19.9600193005123
20.0124078026133
20.0647963047144
20.1171848068155
20.1695733089166
20.2219618110177
20.2743503131188
20.3267388152198
20.3791273173209
20.431515819422
20.4839043215231
20.5362928236242
20.5886813257253
20.6410698278263
20.6934583299274
20.7458468320285
20.7982353341296
20.8506238362307
20.9030123383317
20.9554008404328
21.0077893425339
21.060177844635
21.1125663467361
21.1649548488372
21.2173433509382
21.2697318530393
21.3221203551404
21.3745088572415
21.4268973593426
21.4792858614436
21.5316743635447
21.5840628656458
21.6364513677469
21.688839869848
21.7412283719491
21.7936168740501
21.8460053761512
21.8983938782523
21.9507823803534
22.0031708824545
22.0555593845556
22.1079478866566
22.1603363887577
22.2127248908588
22.2651133929599
22.317501895061
22.369890397162
22.4222788992631
22.4746674013642
22.5270559034653
22.5794444055664
22.6318329076675
22.6842214097685
22.7366099118696
22.7889984139707
22.8413869160718
22.8937754181729
22.9461639202739
22.998552422375
23.0509409244761
23.1033294265772
23.1557179286783
23.2081064307794
23.2604949328804
23.3128834349815
23.3652719370826
23.4176604391837
23.4700489412848
23.5224374433859
23.5748259454869
23.627214447588
23.6796029496891
23.7319914517902
23.7843799538913
23.8367684559923
23.8891569580934
23.9415454601945
23.9939339622956
24.0463224643967
24.0987109664977
24.1510994685988
24.2034879706999
24.255876472801
24.3082649749021
24.3606534770032
24.4130419791042
24.4654304812053
24.5178189833064
24.5702074854075
24.6225959875086
24.6749844896097
24.7273729917107
24.7797614938118
24.8321499959129
24.884538498014
24.9369270001151
24.9893155022161
25.0417040043172
25.0940925064183
25.1464810085194
25.1988695106205
25.2512580127216
25.3036465148226
25.3560350169237
25.4084235190248
25.4608120211259
25.513200523227
25.5655890253281
25.6179775274291
25.6703660295302
25.7227545316313
25.7751430337324
25.8275315358335
25.8799200379345
25.9323085400356
25.9846970421367
26.0370855442378
26.0894740463389
26.14186254844
26.194251050541
26.2466395526421
26.2990280547432
26.3514165568443
26.4038050589454
26.4561935610464
26.5085820631475
26.5609705652486
26.6133590673497
26.6657475694508
26.7181360715519
26.7705245736529
26.822913075754
26.8753015778551
26.9276900799562
26.9800785820573
27.0324670841583
27.0848555862594
27.1372440883605
27.1896325904616
27.2420210925627
27.2944095946638
27.3467980967648
27.3991865988659
27.451575100967
27.5039636030681
27.5563521051692
27.6087406072702
27.6611291093713
27.7135176114724
27.7659061135735
27.8182946156746
27.8706831177757
27.9230716198767
27.9754601219778
28.0278486240789
28.08023712618
28.1326256282811
28.1850141303822
28.2374026324832
28.2897911345843
28.3421796366854
28.3945681387865
28.4469566408876
28.4993451429886
28.5517336450897
28.6041221471908
28.6565106492919
28.708899151393
28.7612876534941
28.8136761555951
28.8660646576962
28.9184531597973
28.9708416618984
29.0232301639995
29.0756186661005
29.1280071682016
29.1803956703027
29.2327841724038
29.2851726745049
29.337561176606
29.389949678707
29.4423381808081
29.4947266829092
29.5471151850103
29.5995036871114
29.6518921892124
29.7042806913135
29.7566691934146
29.8090576955157
29.8614461976168
29.9138346997179
29.9662232018189
30.01861170392
30.0710002060211
30.1233887081222
30.1757772102233
30.2281657123244
30.2805542144254
30.3329427165265
30.3853312186276
30.4377197207287
30.4901082228298
30.5424967249308
30.5948852270319
30.647273729133
30.6996622312341
30.7520507333352
30.8044392354363
30.8568277375373
30.9092162396384
30.9616047417395
31.0139932438406
31.0663817459417
31.1187702480428
31.1711587501438
31.2235472522449
31.275935754346
31.3283242564471
31.3807127585482
31.4331012606492
31.4854897627503
31.5378782648514
31.5902667669525
31.6426552690536
31.6950437711547
31.7474322732557
31.7998207753568
31.8522092774579
31.904597779559
31.9569862816601
32.0093747837611
32.0617632858622
32.1141517879633
32.1665402900644
32.2189287921655
32.2713172942666
32.3237057963676
32.3760942984687
32.4284828005698
32.4808713026709
32.533259804772
32.585648306873
32.6380368089741
32.6904253110752
32.7428138131763
32.7952023152774
32.8475908173785
32.8999793194795
32.9523678215806
33.0047563236817
33.0571448257828
33.1095333278839
33.1619218299849
33.214310332086
33.2666988341871
33.3190873362882
33.3714758383893
33.4238643404904
33.4762528425914
33.5286413446925
33.5810298467936
33.6334183488947
33.6858068509958
33.7381953530968
33.7905838551979
33.842972357299
33.8953608594001
33.9477493615012
34.0001378636023
34.0525263657033
34.1049148678044
34.1573033699055
34.2096918720066
34.2620803741077
34.3144688762088
34.3668573783098
34.4192458804109
34.471634382512
34.5240228846131
34.5764113867142
34.6287998888153
34.6811883909163
34.7335768930174
34.7859653951185
34.8383538972196
34.8907423993207
34.9431309014217
34.9955194035228
35.0479079056239
35.100296407725
35.1526849098261
35.2050734119271
35.2574619140282
35.3098504161293
35.3622389182304
35.4146274203315
35.4670159224326
35.5194044245336
35.5717929266347
35.6241814287358
35.6765699308369
35.728958432938
35.781346935039
35.8337354371401
35.8861239392412
35.9385124413423
35.9909009434434
36.0432894455445
36.0956779476455
36.1480664497466
36.2004549518477
36.2528434539488
36.3052319560499
36.357620458151
36.410008960252
36.4623974623531
36.5147859644542
36.5671744665553
36.6195629686564
36.6719514707574
36.7243399728585
36.7767284749596
36.8291169770607
36.8815054791618
36.9338939812629
36.9862824833639
37.038670985465
37.0910594875661
37.1434479896672
37.1958364917683
37.2482249938693
37.3006134959704
37.3530019980715
37.4053905001726
37.4577790022737
37.5101675043748
37.5625560064758
37.6149445085769
37.667333010678
37.7197215127791
37.7721100148802
37.8244985169813
37.8768870190823
37.9292755211834
37.9816640232845
38.0340525253856
38.0864410274867
38.1388295295877
38.1912180316888
38.2436065337899
38.295995035891
38.3483835379921
38.4007720400932
38.4531605421942
38.5055490442953
38.5579375463964
38.6103260484975
38.6627145505986
38.7151030526996
38.7674915548007
38.8198800569018
38.8722685590029
38.924657061104
38.9770455632051
39.0294340653061
39.0818225674072
39.1342110695083
39.1865995716094
39.2389880737105
39.2913765758115
39.3437650779126
39.3961535800137
39.4485420821148
39.5009305842159
39.553319086317
39.605707588418
39.6580960905191
39.7104845926202
39.7628730947213
39.8152615968224
39.8676500989234
39.9200386010245
39.9724271031256
40.0248156052267
40.0772041073278
40.1295926094289
40.1819811115299
40.234369613631
40.2867581157321
40.3391466178332
40.3915351199343
40.4439236220354
40.4963121241364
40.5487006262375
40.6010891283386
40.6534776304397
40.7058661325408
40.7582546346419
40.8106431367429
40.863031638844
40.9154201409451
40.9678086430462
41.0201971451473
41.0725856472483
41.1249741493494
41.1773626514505
41.2297511535516
41.2821396556527
41.3345281577538
41.3869166598548
41.4393051619559
41.491693664057
41.5440821661581
41.5964706682592
41.6488591703602
41.7012476724613
41.7536361745624
41.8060246766635
41.8584131787646
41.9108016808657
41.9631901829667
42.0155786850678
42.0679671871689
42.12035568927
42.1727441913711
42.2251326934721
42.2775211955732
42.3299096976743
42.3822981997754
42.4346867018765
42.4870752039776
42.5394637060786
42.5918522081797
42.6442407102808
42.6966292123819
42.749017714483
42.801406216584
42.8537947186851
42.9061832207862
42.9585717228873
43.0109602249884
43.0633487270895
43.1157372291905
43.1681257312916
43.2205142333927
43.2729027354938
43.3252912375949
43.3776797396959
43.430068241797
43.4824567438981
43.5348452459992
43.5872337481003
43.6396222502014
43.6920107523024
43.7443992544035
43.7967877565046
43.8491762586057
43.9015647607068
43.9539532628079
44.0063417649089
44.05873026701
44.1111187691111
44.1635072712122
44.2158957733133
44.2682842754143
44.3206727775154
44.3730612796165
44.4254497817176
44.4778382838187
44.5302267859198
44.5826152880208
44.6350037901219
44.687392292223
44.7397807943241
44.7921692964252
44.8445577985262
44.8969463006273
44.9493348027284
45.0017233048295
45.0541118069306
45.1065003090317
45.1588888111327
45.2112773132338
45.2636658153349
45.316054317436
45.3684428195371
45.4208313216381
45.4732198237392
45.5256083258403
45.5779968279414
45.6303853300425
45.6827738321436
45.7351623342446
45.7875508363457
45.8399393384468
45.8923278405479
45.944716342649
45.9971048447501
46.0494933468511
46.1018818489522
46.1542703510533
46.2066588531544
46.2590473552555
46.3114358573565
46.3638243594576
46.4162128615587
46.4686013636598
46.5209898657609
46.573378367862
46.625766869963
46.6781553720641
46.7305438741652
46.7829323762663
46.8353208783674
46.8877093804685
46.9400978825695
46.9924863846706
47.0448748867717
47.0972633888728
47.1496518909739
47.2020403930749
47.254428895176
47.3068173972771
47.3592058993782
47.4115944014793
47.4639829035804
47.5163714056814
47.5687599077825
47.6211484098836
47.6735369119847
47.7259254140858
47.7783139161868
47.8307024182879
47.883090920389
47.9354794224901
47.9878679245912
48.0402564266923
48.0926449287933
48.1450334308944
48.1974219329955
48.2498104350966
48.3021989371977
48.3545874392987
48.4069759413998
48.4593644435009
48.511752945602
48.5641414477031
48.6165299498042
48.6689184519052
48.7213069540063
48.7736954561074
48.8260839582085
48.8784724603096
48.9308609624106
48.9832494645117
49.0356379666128
49.0880264687139
49.140414970815
49.1928034729161
49.2451919750171
49.2975804771182
49.3499689792193
49.4023574813204
49.4547459834215
49.5071344855226
49.5595229876236
49.6119114897247
49.6642999918258
49.7166884939269
49.769076996028
49.821465498129
49.8738540002301
49.9262425023312
49.9786310044323
50.0310195065334
50.0834080086345
50.1357965107355
50.1881850128366
50.2405735149377
50.2929620170388
50.3453505191399
50.397739021241
50.450127523342
50.5025160254431
50.5549045275442
50.6072930296453
50.6596815317464
50.7120700338474
50.7644585359485
50.8168470380496
50.8692355401507
50.9216240422518
50.9740125443529
51.0264010464539
51.078789548555
51.1311780506561
51.1835665527572
51.2359550548583
51.2883435569593
51.3407320590604
51.3931205611615
51.4455090632626
51.4978975653637
51.5502860674648
51.6026745695658
51.6550630716669
51.707451573768
51.7598400758691
51.8122285779702
51.8646170800712
51.9170055821723
51.9693940842734
52.0217825863745
52.0741710884756
52.1265595905767
52.1789480926777
52.2313365947788
52.2837250968799
52.336113598981
52.3885021010821
52.4408906031831
52.4932791052842
52.5456676073853
52.5980561094864
52.6504446115875
52.7028331136886
52.7552216157896
52.8076101178907
52.8599986199918
52.9123871220929
52.964775624194
53.017164126295
53.0695526283961
53.1219411304972
53.1743296325983
53.2267181346994
53.2791066368005
53.3314951389015
53.3838836410026
53.4362721431037
53.4886606452048
53.5410491473059
53.593437649407
53.645826151508
53.6982146536091
53.7506031557102
53.8029916578113
53.8553801599124
53.9077686620134
53.9601571641145
54.0125456662156
54.0649341683167
54.1173226704178
54.1697111725189
54.2220996746199
54.274488176721
54.3268766788221
54.3792651809232
54.4316536830243
54.4840421851253
54.5364306872264
54.5888191893275
54.6412076914286
54.6935961935297
54.7459846956308
54.7983731977318
54.8507616998329
54.903150201934
54.9555387040351
55.0079272061362
55.0603157082372
55.1127042103383
55.1650927124394
55.2174812145405
55.2698697166416
55.3222582187427
55.3746467208437
55.4270352229448
55.4794237250459
55.531812227147
55.5842007292481
55.6365892313492
55.6889777334502
55.7413662355513
55.7937547376524
55.8461432397535
55.8985317418546
55.9509202439557
56.0033087460567
56.0556972481578
56.1080857502589
56.16047425236
56.2128627544611
56.2652512565621
56.3176397586632
56.3700282607643
56.4224167628654
56.4748052649665
56.5271937670676
56.5795822691686
56.6319707712697
56.6843592733708
56.7367477754719
56.789136277573
56.841524779674
56.8939132817751
56.9463017838762
56.9986902859773
57.0510787880784
57.1034672901795
57.1558557922805
57.2082442943816
57.2606327964827
57.3130212985838
57.3654098006849
57.4177983027859
57.470186804887
57.5225753069881
57.5749638090892
57.6273523111903
57.6797408132914
57.7321293153924
57.7845178174935
57.8369063195946
57.8892948216957
57.9416833237968
57.9940718258979
58.0464603279989
58.0988488301
58.1512373322011
58.2036258343022
58.2560143364033
58.3084028385043
58.3607913406054
58.4131798427065
58.4655683448076
58.5179568469087
58.5703453490097
58.6227338511108
58.6751223532119
58.727510855313
58.7798993574141
58.8322878595152
58.8846763616162
58.9370648637173
58.9894533658184
59.0418418679195
59.0942303700206
59.1466188721216
59.1990073742227
59.2513958763238
59.3037843784249
59.356172880526
59.4085613826271
59.4609498847281
59.5133383868292
59.5657268889303
59.6181153910314
59.6705038931325
59.7228923952336
59.7752808973346
59.8276693994357
59.8800579015368
59.9324464036379
59.984834905739
60.03722340784
60.0896119099411
60.1420004120422
60.1943889141433
60.2467774162444
60.2991659183455
60.3515544204465
60.4039429225476
60.4563314246487
60.5087199267498
60.5611084288509
60.6134969309519
60.665885433053
60.7182739351541
60.7706624372552
60.8230509393563
60.8754394414574
60.9278279435584
60.9802164456595
61.0326049477606
61.0849934498617
61.1373819519628
61.1897704540639
61.2421589561649
61.294547458266
61.3469359603671
61.3993244624682
61.4517129645693
61.5041014666703
61.5564899687714
61.6088784708725
61.6612669729736
61.7136554750747
61.7660439771758
61.8184324792768
61.8708209813779
61.923209483479
61.9755979855801
62.0279864876812
62.0803749897822
62.1327634918833
62.1851519939844
62.2375404960855
62.2899289981866
62.3423175002877
62.3947060023887
62.4470945044898
62.4994830065909
62.551871508692
62.6042600107931
62.6566485128942
62.7090370149952
62.7614255170963
62.8138140191974
62.8662025212985
62.9185910233996
62.9709795255006
63.0233680276017
63.0757565297028
63.1281450318039
63.180533533905
63.2329220360061
63.2853105381071
63.3376990402082
63.3900875423093
63.4424760444104
63.4948645465115
63.5472530486126
63.5996415507136
63.6520300528147
63.7044185549158
63.7568070570169
63.809195559118
63.861584061219
63.9139725633201
63.9663610654212
64.0187495675223
64.0711380696234
64.1235265717245
64.1759150738255
64.2283035759266
64.2806920780277
64.3330805801288
64.3854690822299
64.4378575843309
64.490246086432
64.5426345885331
64.5950230906342
64.6474115927353
64.6998000948364
64.7521885969374
64.8045770990385
64.8569656011396
64.9093541032407
64.9617426053418
65.0141311074428
65.0665196095439
65.118908111645
65.1712966137461
65.2236851158472
65.2760736179482
65.3284621200493
65.3808506221504
65.4332391242515
65.4856276263526
65.5380161284537
65.5904046305547
65.6427931326558
65.6951816347569
65.747570136858
65.7999586389591
65.8523471410602
65.9047356431612
65.9571241452623
66.0095126473634
66.0619011494645
66.1142896515656
66.1666781536667
66.2190666557677
66.2714551578688
66.3238436599699
66.376232162071
66.4286206641721
66.4810091662731
66.5333976683742
66.5857861704753
66.6381746725764
66.6905631746775
66.7429516767785
66.7953401788796
66.8477286809807
66.9001171830818
66.9525056851829
67.004894187284
67.057282689385
67.1096711914861
67.1620596935872
67.2144481956883
67.2668366977894
67.3192251998905
67.3716137019915
67.4240022040926
67.4763907061937
67.5287792082948
67.5811677103959
67.6335562124969
67.685944714598
67.7383332166991
67.7907217188002
67.8431102209013
67.8954987230024
67.9478872251034
68.0002757272045
68.0526642293056
68.1050527314067
68.1574412335078
68.2098297356088
68.2622182377099
68.314606739811
68.3669952419121
68.4193837440132
68.4717722461143
68.5241607482154
68.5765492503164
68.6289377524175
68.6813262545186
68.7337147566197
68.7861032587208
68.8384917608218
68.8908802629229
68.943268765024
68.9956572671251
69.0480457692262
69.1004342713272
69.1528227734283
69.2052112755294
69.2575997776305
69.3099882797316
69.3623767818327
69.4147652839337
69.4671537860348
69.5195422881359
69.571930790237
69.6243192923381
69.6767077944392
69.7290962965402
69.7814847986413
69.8338733007424
69.8862618028435
69.9386503049446
69.9910388070456
70.0434273091467
70.0958158112478
70.1482043133489
70.20059281545
70.2529813175511
70.3053698196521
70.3577583217532
70.4101468238543
70.4625353259554
70.5149238280565
70.5673123301575
70.6197008322586
70.6720893343597
70.7244778364608
70.7768663385619
70.829254840663
70.881643342764
70.9340318448651
70.9864203469662
71.0388088490673
71.0911973511684
71.1435858532694
71.1959743553705
71.2483628574716
71.3007513595727
71.3531398616738
71.4055283637749
71.4579168658759
71.510305367977
71.5626938700781
71.6150823721792
71.6674708742803
71.7198593763814
71.7722478784824
71.8246363805835
71.8770248826846
71.9294133847857
71.9818018868868
72.0341903889878
72.0865788910889
72.13896739319
72.1913558952911
72.2437443973922
72.2961328994932
72.3485214015943
72.4009099036954
72.4532984057965
72.5056869078976
72.5580754099987
72.6104639120997
72.6628524142008
72.7152409163019
72.767629418403
72.8200179205041
72.8724064226052
72.9247949247062
72.9771834268073
73.0295719289084
73.0819604310095
73.1343489331106
73.1867374352116
73.2391259373127
73.2915144394138
73.3439029415149
73.396291443616
73.4486799457171
73.5010684478181
73.5534569499192
73.6058454520203
73.6582339541214
73.7106224562225
73.7630109583235
73.8153994604246
73.8677879625257
73.9201764646268
73.9725649667279
74.024953468829
74.07734197093
74.1297304730311
74.1821189751322
74.2345074772333
74.2868959793344
74.3392844814355
74.3916729835365
74.4440614856376
74.4964499877387
74.5488384898398
74.6012269919409
74.6536154940419
74.706003996143
74.7583924982441
74.8107810003452
74.8631695024463
74.9155580045473
74.9679465066484
75.0203350087495
75.0727235108506
75.1251120129517
75.1775005150528
75.2298890171539
75.2822775192549
75.334666021356
75.3870545234571
75.4394430255582
75.4918315276593
75.5442200297603
75.5966085318614
75.6489970339625
75.7013855360636
75.7537740381647
75.8061625402658
75.8585510423668
75.9109395444679
75.963328046569
76.0157165486701
76.0681050507712
76.1204935528722
76.1728820549733
76.2252705570744
76.2776590591755
76.3300475612766
76.3824360633777
76.4348245654787
76.4872130675798
76.5396015696809
76.591990071782
76.6443785738831
76.6967670759841
76.7491555780852
76.8015440801863
76.8539325822874
76.9063210843885
76.9587095864896
77.0110980885906
77.0634865906917
77.1158750927928
77.1682635948939
77.220652096995
77.273040599096
77.3254291011971
77.3778176032982
77.4302061053993
77.4825946075004
77.5349831096015
77.5873716117025
77.6397601138036
77.6921486159047
77.7445371180058
77.7969256201069
77.8493141222079
77.901702624309
77.9540911264101
78.0064796285112
78.0588681306123
78.1112566327134
78.1636451348144
78.2160336369155
78.2684221390166
78.3208106411177
78.3731991432188
78.4255876453199
78.4779761474209
78.530364649522
78.5827531516231
78.6351416537242
78.6875301558253
78.7399186579263
78.7923071600274
78.8446956621285
78.8970841642296
78.9494726663307
79.0018611684318
79.0542496705328
79.1066381726339
79.159026674735
79.2114151768361
79.2638036789372
79.3161921810382
79.3685806831393
79.4209691852404
79.4733576873415
79.5257461894426
79.5781346915437
79.6305231936447
79.6829116957458
79.7353001978469
79.787688699948
79.8400772020491
79.8924657041502
79.9448542062512
79.9972427083523
80.0496312104534
80.1020197125545
80.1544082146556
80.2067967167566
80.2591852188577
80.3115737209588
80.3639622230599
80.416350725161
80.468739227262
80.5211277293631
80.5735162314642
80.6259047335653
80.6782932356664
80.7306817377675
80.7830702398686
80.8354587419696
80.8878472440707
80.9402357461718
80.9926242482729
81.045012750374
81.097401252475
81.1497897545761
81.2021782566772
81.2545667587783
81.3069552608794
81.3593437629805
81.4117322650815
81.4641207671826
81.5165092692837
81.5688977713848
81.6212862734859
81.6736747755869
81.726063277688
81.7784517797891
81.8308402818902
81.8832287839913
81.9356172860924
81.9880057881934
82.0403942902945
82.0927827923956
82.1451712944967
82.1975597965978
82.2499482986989
82.3023368007999
82.354725302901
82.4071138050021
82.4595023071032
82.5118908092043
82.5642793113053
82.6166678134064
82.6690563155075
82.7214448176086
82.7738333197097
82.8262218218107
82.8786103239118
82.9309988260129
82.983387328114
83.0357758302151
83.0881643323162
83.1405528344172
83.1929413365183
83.2453298386194
83.2977183407205
83.3501068428216
83.4024953449226
83.4548838470237
83.5072723491248
83.5596608512259
83.612049353327
83.6644378554281
83.7168263575291
83.7692148596302
83.8216033617313
83.8739918638324
83.9263803659335
83.9787688680345
84.0311573701356
84.0835458722367
84.1359343743378
84.1883228764389
84.24071137854
84.293099880641
84.3454883827421
84.3978768848432
84.4502653869443
84.5026538890454
84.5550423911465
84.6074308932475
84.6598193953486
84.7122078974497
84.7645963995508
84.8169849016519
84.8693734037529
84.921761905854
84.9741504079551
85.0265389100562
85.0789274121573
85.1313159142584
85.1837044163594
85.2360929184605
85.2884814205616
85.3408699226627
85.3932584247638
85.4456469268649
85.4980354289659
85.550423931067
85.6028124331681
85.6552009352692
85.7075894373703
85.7599779394713
85.8123664415724
85.8647549436735
85.9171434457746
85.9695319478757
86.0219204499767
86.0743089520778
86.1266974541789
86.17908595628
86.2314744583811
86.2838629604822
86.3362514625832
86.3886399646843
86.4410284667854
86.4934169688865
86.5458054709876
86.5981939730887
86.6505824751897
86.7029709772908
86.7553594793919
86.807747981493
86.8601364835941
86.9125249856951
86.9649134877962
87.0173019898973
87.0696904919984
87.1220789940995
87.1744674962006
87.2268559983016
87.2792445004027
87.3316330025038
87.3840215046049
87.436410006706
87.4887985088071
87.5411870109081
87.5935755130092
87.6459640151103
87.6983525172114
87.7507410193125
87.8031295214136
87.8555180235146
87.9079065256157
87.9602950277168
88.0126835298179
88.065072031919
88.11746053402
88.1698490361211
88.2222375382222
88.2746260403233
88.3270145424244
88.3794030445254
88.4317915466265
88.4841800487276
88.5365685508287
88.5889570529298
88.6413455550309
88.6937340571319
88.746122559233
88.7985110613341
88.8508995634352
88.9032880655363
88.9556765676374
89.0080650697384
89.0604535718395
89.1128420739406
89.1652305760417
89.2176190781428
89.2700075802438
89.3223960823449
89.374784584446
89.4271730865471
89.4795615886482
89.5319500907492
89.5843385928503
89.6367270949514
89.6891155970525
89.7415040991536
89.7938926012547
89.8462811033557
89.8986696054568
89.9510581075579
90.003446609659
90.0558351117601
90.1082236138612
90.1606121159622
90.2130006180633
90.2653891201644
90.3177776222655
90.3701661243666
90.4225546264676
90.4749431285687
90.5273316306698
90.5797201327709
90.632108634872
90.6844971369731
90.7368856390741
90.7892741411752
90.8416626432763
90.8940511453774
90.9464396474785
90.9988281495796
91.0512166516806
91.1036051537817
91.1559936558828
91.2083821579839
91.260770660085
91.313159162186
91.3655476642871
91.4179361663882
91.4703246684893
91.5227131705904
91.5751016726914
91.6274901747925
91.6798786768936
91.7322671789947
91.7846556810958
91.8370441831969
91.8894326852979
91.941821187399
91.9942096895001
92.0465981916012
92.0989866937023
92.1513751958034
92.2037636979044
92.2561522000055
92.3085407021066
92.3609292042077
92.4133177063088
92.4657062084098
92.5180947105109
92.570483212612
92.6228717147131
92.6752602168142
92.7276487189153
92.7800372210163
92.8324257231174
92.8848142252185
92.9372027273196
92.9895912294207
93.0419797315217
93.0943682336228
93.1467567357239
93.199145237825
93.2515337399261
93.3039222420272
93.3563107441283
93.4086992462293
93.4610877483304
93.5134762504315
93.5658647525326
93.6182532546337
93.6706417567347
93.7230302588358
93.7754187609369
93.827807263038
93.8801957651391
93.9325842672401
93.9849727693412
94.0373612714423
94.0897497735434
94.1421382756445
94.1945267777456
94.2469152798466
94.2993037819477
94.3516922840488
94.4040807861499
94.456469288251
94.5088577903521
94.5612462924531
94.6136347945542
94.6660232966553
94.7184117987564
94.7708003008575
94.8231888029585
94.8755773050596
94.9279658071607
94.9803543092618
95.0327428113629
95.085131313464
95.137519815565
95.1899083176661
95.2422968197672
95.2946853218683
95.3470738239694
95.3994623260704
95.4518508281715
95.5042393302726
95.5566278323737
95.6090163344748
95.6614048365759
95.7137933386769
95.766181840778
95.8185703428791
95.8709588449802
95.9233473470813
95.9757358491823
96.0281243512834
96.0805128533845
96.1329013554856
96.1852898575867
96.2376783596877
96.2900668617888
96.3424553638899
96.394843865991
96.4472323680921
96.4996208701932
96.5520093722943
96.6043978743953
96.6567863764964
96.7091748785975
96.7615633806986
96.8139518827997
96.8663403849007
96.9187288870018
96.9711173891029
97.023505891204
97.0758943933051
97.1282828954061
97.1806713975072
97.2330598996083
97.2854484017094
97.3378369038105
97.3902254059116
97.4426139080126
97.4950024101137
97.5473909122148
97.5997794143159
97.652167916417
97.7045564185181
97.7569449206191
97.8093334227202
97.8617219248213
97.9141104269224
97.9664989290235
98.0188874311245
98.0712759332256
98.1236644353267
98.1760529374278
98.2284414395289
98.28082994163
98.333218443731
98.3856069458321
98.4379954479332
98.4903839500343
98.5427724521354
98.5951609542364
98.6475494563375
98.6999379584386
98.7523264605397
98.8047149626408
98.8571034647419

Radius_High_Eqm
100	100	100	100	100	100	100	100	100	100
99.9998990669354	99.9998980474085	99.9998948613867	99.9998890845334	99.9998798415667	99.9998654225353	99.999842291997	99.9998020918382	99.9997196298729	99.9994687710581
99.9996968370574	99.9996937757589	99.9996842093242	99.9996668640659	99.9996391129261	99.9995958242779	99.9995263900388	99.9994057389137	99.9991583422152	99.9984065024762
99.9993929449344	99.9993868169235	99.9993676672937	99.9993329473432	99.9992774005614	99.9991907602564	99.9990518072662	99.9988104086298	99.9983156574522	99.996813220657
99.9989870234454	99.9989768011047	99.9989448570846	99.9988869413834	99.9987942892087	99.9986497838709	99.9984180560718	99.998015575259	99.9971911394277	99.9946888241631
99.9984787037738	99.9984633568275	99.9984153987881	99.9983284514706	99.9981893618552	99.9979724469126	99.9976246483606	99.9970207212642	99.9957843785472	99.992033108917
99.9978676154006	99.9978461109316	99.9977789107892	99.9976570811485	99.9974621997366	99.9971582995913	99.9966710958423	99.9958253376376	99.9940949801479	99.9888457864697
99.9971533860973	99.9971246885633	99.9970350097588	99.9968724322137	99.9966123823357	99.9962068905707	99.9955569103134	99.9944289236363	99.9921225564868	99.9851264973757
99.9963356419198	99.9962987131676	99.9961833106472	99.9959741047093	99.9956394873824	99.9951177670109	99.9942816039043	99.9928309861627	99.9898667212318	99.9808748210992
99.995414007201	99.9953678064804	99.9952234266752	99.9949616969189	99.9945430908538	99.9938904746161	99.9928446892834	99.991031038956	99.9873270856865	99.9760902834448
99.9943881045439	99.9943315885204	99.9941549693275	99.9938348053599	99.9933227669764	99.9925245576866	99.991245679812	99.9890286016996	99.9845032562131	99.9707723622121
99.9932575548143	99.9931896775812	99.992977548345	99.9925930247777	99.9919780882294	99.9910195591719	99.9894840896524	99.9868231991124	99.981394832485	99.9649204915646
99.9920219771341	99.9919416902232	99.9916907717164	99.9912359481402	99.9905086253492	99.9893750207238	99.9875594338314	99.9844143600642	99.9780014063119	99.9585340654581
99.9906809888733	99.9905872412658	99.9902942456716	99.9897631666315	99.9889139473344	99.9875904827489	99.9854712282664	99.981801616739	99.9743225608615	99.9516124403769
99.9892342056434	99.989125943779	99.9887875746735	99.9881742696473	99.9871936214535	99.9856654844571	99.9832189897559	99.9789845038569	99.9703578701535	99.94415493755
99.9876812412892	99.9875574090758	99.9871703614107	99.9864688447891	99.9853472132517	99.9835995639074	99.9808022359424	99.9759625579625	99.9661068987413	99.9361608447757
99.986021707882	99.9858812467038	99.9854422067896	99.9846464778597	99.9833742865596	99.981392258049	99.9782204852519	99.972735316776	99.9615692015229	99.9276294179442
99.984330463886	99.9841730727931	99.9836810938616	99.9827894442094	99.98136398685	99.9791434379407	99.9755908405425	99.969449882112	99.9569533934084	99.9189561383457
99.9825321679853	99.9823567856571	99.9818085438435	99.9808149551368	99.9792266309342	99.9767526707451	99.972795644085	99.9659586854004	99.9520504319408	99.9097439857257
99.9806264283873	99.9804319909893	99.9798241537652	99.9787225925785	99.9769617791503	99.9742194918365	99.9698344171801	99.9622612621047	99.9468597928012	99.8999922499298
99.9786128515011	99.9783982926931	99.9777275188523	99.9765119366626	99.9745689901636	99.9715434355837	99.9667066813973	99.9583571447239	99.9413809600799	99.8897001669718
99.9764910419297	99.9762552928737	99.9755182325181	99.9741825657051	99.9720478209757	99.9687240353624	99.9634119583765	99.954245863562	99.9356134206928	99.8788669271018
99.9742606024624	99.9740025918296	99.9731958863569	99.9717340562068	99.9693978269334	99.9657608235599	99.9599497696777	99.9499269471193	99.9295566605383	99.8674916806103
99.9719211340667	99.9716397880449	99.9707600701363	99.9691659828499	99.9666185617371	99.9626533315742	99.9563196366609	99.945399922237	99.9232101618594	99.8555735420416
99.9694722358805	99.9691664781809	99.9682103717903	99.9664779184953	99.9637095774483	99.9594010898093	99.9525210803805	99.9406643140868	99.9165734014384	99.8431115932841
99.9669135052037	99.9665822570678	99.9655463774121	99.96366943418	99.9606704244964	99.9560036276677	99.948553621489	99.9357196460658	99.9096458493661	99.8301048858665
99.9642445374907	99.9638867176966	99.9627676712468	99.9607400991144	99.9575006516846	99.9524604735394	99.9444167801445	99.9305654396368	99.9024269682073	99.8165524426864
99.9614649263416	99.9610794512109	99.9598738356849	99.9576894806794	99.9541998061951	99.9487711547893	99.9401100759184	99.9252012141399	99.8949162124408	99.8024532593316
99.9585742634945	99.9581600468985	99.9568644512546	99.9545171444246	99.9507674335935	99.9449351977423	99.9356330277038	99.9196264865938	99.8871130280873	99.7878063051071
99.9555721388168	99.9551280921835	99.9537390966156	99.9512226540653	99.9472030778321	99.9409521276657	99.9309851536226	99.9138407714952	99.8790168524663	99.7726105238447
99.9524581402975	99.9519831726177	99.9504973485519	99.9478055714803	99.9435062812524	99.9368214687508	99.9261659709318	99.9078435806259	99.8706271140418	99.7568648345535
99.949231854038	99.9487248718724	99.9471387819651	99.9442654567094	99.9396765845867	99.9325427440911	99.9211749959298	99.9016344228676	99.8619432323285	99.7405681319489
99.9458928642446	99.9453527717305	99.9436629698674	99.940601867951	99.9357135269586	99.9281154756601	99.9160117438613	99.8952128040299	99.852964617838	99.7237192868906
99.9424407532192	99.9418664520777	99.9400694833753	99.9368143615593	99.9316166458833	99.9235391842862	99.9106757288236	99.8885782266894	99.843690672053	99.7063171467479
99.9389562907793	99.9383475007935	99.9364424656241	99.9329917152004	99.9274821396971	99.9189216585265	99.9052933542997	99.8818894533692	99.8343464911866	99.6887886541959
99.9353581871984	99.9347138077947	99.9326972415128	99.92904460361	99.9232132464758	99.9141545444802	99.8997376802602	99.8749872114934	99.8247062937194	99.6707045779673
99.9316460206428	99.9309649488398	99.9288333780708	99.9249725792814	99.918809500632	99.9092373610768	99.8940082179804	99.8678709904589	99.8147694005841	99.652063829325
99.9278193673476	99.9271004977658	99.9248504404129	99.92077519286	99.9142704349642	99.9041696259778	99.8881044770966	99.8605402736148	99.8045351432774	99.6328652689494
99.923877801608	99.9231200264798	99.9207479917332	99.9164519931398	99.9095955806525	99.8989508555418	99.8820259654358	99.8529945393931	99.7940028578242	99.6131077150103
99.9198208957712	99.9190231049507	99.9165255932982	99.91200252706	99.9047844672518	99.8935805647857	99.8757721889057	99.8452332619966	99.7831718806053	99.5927899488696
99.9156482202271	99.9148093012009	99.9121828044403	99.9074263397017	99.8998366226851	99.8880582673446	99.8693426514181	99.8372559117925	99.7720415454747	99.5719107191294
99.9113593434002	99.9104781812979	99.9077191825517	99.9027229742835	99.8947515732354	99.8823834754322	99.8627368548352	99.8290619555121	99.7606111817684	99.5504687445219
99.9069538317407	99.9060293093463	99.903134283077	99.8978919721575	99.8895288435367	99.8765556998006	99.855954298925	99.8206508563244	99.7488801129303	99.5284627159848
99.9024312497153	99.9014622474794	99.8984276595075	99.8929328728049	99.8841679565639	99.8705744497016	99.8489944813227	99.8120220738309	99.7368476555636	99.505891298163
99.8977911597992	99.8967765558507	99.8935988633737	99.8878452138311	99.8786684336222	99.8644392328496	99.8418568974937	99.8031750640105	99.7245131187768	99.4827531305038
99.8930331224667	99.891971792626	99.8886474442395	99.882628530961	99.8730297943357	99.8581495553844	99.8345410406955	99.7941092791364	99.7118758037337	99.4590468280616
99.8881566961823	99.8870475139744	99.8835729496948	99.8772823580333	99.8672515566351	99.8517049218351	99.8270464019379	99.7848241676788	99.6989350033427	99.4347709820954
99.8831614373923	99.8820032740607	99.878374925349	99.8718062269951	99.861333236745	99.8451048350855	99.8193724699419	99.7753191741996	99.685690002043	99.4099241605141
99.8780469005152	99.8768386250366	99.8730529148245	99.8661996678959	99.8552743491703	99.8383487963384	99.8115187310952	99.7655937392481	99.672140075657	99.3845049082127
99.8728126379334	99.8715531170325	99.867606459749	99.8604622088814	99.849074406683	99.8314363050824	99.8034846694074	99.7556472992578	99.6582844912886	99.3585117473253
99.8674581999836	99.866146298149	99.8620350997495	99.8545933761869	99.8427329203069	99.824366859057	99.7952697664615	99.7454792864479	99.6441225072511	99.3319431774172
99.8620707068806	99.8607061718259	99.8564295969598	99.848688936414	99.8363536711552	99.8172567549496	99.7870104073925	99.7352609971705	99.6298970404882	99.3052604581841
99.8565624788624	99.8551441733861	99.8506986195961	99.842652541731	99.8298322897853	99.8099891142528	99.7785696376199	99.7248205238975	99.6153642555538	99.2779994081484
99.8509330618384	99.8494598465389	99.8448417030182	99.8364837144319	99.8231682837744	99.8025634311129	99.7699469324627	99.7141572829141	99.6005233270587	99.2501586031772
99.8451819996439	99.8436527329388	99.8388583805649	99.8301819748796	99.816361158896	99.7949791977829	99.7611417644814	99.7032706835053	99.5853734416828	99.2217365668076
99.8393088340314	99.8377223721778	99.8327481835466	99.8237468414974	99.8094104191031	99.7872359045848	99.7521536033396	99.6921601292102	99.5699137916652	99.1927317787674
99.8333131046613	99.8316683017761	99.826510641238	99.8171778307609	99.8023155665108	99.7793330398701	99.7429819157269	99.6808250185975	99.5541435702952	99.163142680961
99.8271943490929	99.8254900571742	99.8201452808702	99.810474457189	99.7950761013784	99.7712700899782	99.7336261653173	99.6692647457211	99.5380619687875	99.1329676816872
99.8209521027751	99.8191871717237	99.8136516276233	99.8036362333353	99.7876915220915	99.7630465391979	99.7240858127478	99.657478700365	99.5216681741139	99.1022051586194
99.8145858990372	99.812759176679	99.8070292046182	99.796662669778	99.7801613251433	99.754661869728	99.7143603156076	99.6454662681496	99.504961367499	99.0708534609193
99.8080952690798	99.8062056011882	99.800277532909	99.7895532751111	99.7724850051149	99.7461155616408	99.7044491284299	99.6332268305507	99.4879407233724	99.0389109107395
99.8014797419654	99.7995259722849	99.7933961314745	99.7823075559336	99.7646620546564	99.7374070928469	99.6943517026842	99.6207597648627	99.4706054086391	99.0063758042946
99.7947388446089	99.7927198148788	99.7863845172103	99.7749250168401	99.7566919644667	99.7285359390616	99.6840674867664	99.6080644441298	99.4529545821682	98.9732464126262
99.7878721017687	99.7857866517472	99.7792422049202	99.7674051604095	99.7485742232739	99.7195015737724	99.6735959259848	99.5951402370591	99.4349873944332	98.9395209821488
99.7808790360367	99.778726003526	99.7719687073077	99.7597474871943	99.7403083178147	99.7103034682074	99.6629364625428	99.5819865079245	99.4167029872566	98.9051977350369
99.7737591678291	99.7715373887004	99.7645635349676	99.7519514957097	99.7318937328146	99.700941091305	99.6520885355181	99.5686026164688	99.3981004936264	98.870274869498
99.766512015377	99.7642203235965	99.7570261963765	99.744016682422	99.7233299509669	99.6914139096843	99.6410515808382	99.5549879178064	99.3791790375624	98.8347505599604
99.7592310690007	99.7568692475002	99.7494540946373	99.7360458273766	99.7147283628174	99.6818467562985	99.6299720023946	99.5413263141518	99.3601995231935	98.7991209905479
99.7518222391564	99.7493891211273	99.7417492202178	99.7279355364522	99.7059769610375	99.6721141844652	99.6187027699274	99.5274331801458	99.3408999138404	98.7628864743173
99.7442850393645	99.7417794561573	99.7339110771088	99.7196853018786	99.6970752241461	99.6622156556897	99.6072433111898	99.5133078536272	99.3212792456497	98.7260452686586
99.7366189809302	99.7340397620834	99.7259391671566	99.7112946137977	99.6880226285541	99.6521506290318	99.5955930505189	99.4989496648646	99.301336567859	98.6885955753106
99.7288235729341	99.7261695462033	99.7178329900528	99.7027629602505	99.6788186485431	99.641918561073	99.5837514087076	99.4843579378905	99.2810709358439	98.6505355493921
99.7208983222221	99.7181683136093	99.7095920433251	99.6940898271642	99.669462756244	99.6315189058815	99.5717178029391	99.4695319913268	99.2604814062966	98.6118633057308
99.7128427333962	99.710035567179	99.7012158223274	99.6852746983391	99.6599544216155	99.6209511149758	99.5594916467597	99.4544711388703	99.2395670338787	98.572576923307
99.704656308804	99.7017708075658	99.6927038202294	99.6763170554348	99.650293112422	99.6102146372897	99.5470723500702	99.4391746895524	99.2183268688938	98.53267444838
99.6963385485292	99.6933735331885	99.6840555280069	99.6672163779569	99.6404782942114	99.5993089191385	99.5344593191287	99.4236419478525	99.196759955667	98.4921538966887
99.6878889503816	99.6848432402225	99.6752704344311	99.657972143243	99.6305094302935	99.5882334041865	99.5216519565554	99.4078722137181	99.1748653314126	98.4510132550027
99.6793070098871	99.676179422589	99.6663480260579	99.648583826448	99.6203859817164	99.5769875334166	99.5086496613359	99.3918647825248	99.1526420254395	98.4092504822136
99.6705922202772	99.6673815719455	99.6572877872177	99.6390509005306	99.610107407245	99.5655707451012	99.4954518288221	99.3756189450033	99.1300890585907	98.3668635101001
99.6617440724796	99.6584491776754	99.6480892000041	99.6293728362377	99.5996731633378	99.5539824747744	99.4820578507286	99.3591339871455	99.1072054428439	98.3238502438596
99.652762055107	99.6493817268781	99.638751744263	99.6195491020905	99.5890827041249	99.5422221552046	99.4684671151239	99.3424091901023	99.0839901810242	98.2802085624721
99.6436456544476	99.6401787043583	99.6292748975815	99.6095791643685	99.5783354813846	99.5302892163687	99.4546790064176	99.3254438300783	99.0604422665932	98.2359363189417
99.6343943544541	99.630839592616	99.619658135276	99.5994624870951	99.5674309445221	99.5181830854266	99.4406929053427	99.3082371782271	99.0365606834916	98.1910313404488
99.6250076367336	99.6213638718358	99.6099009303815	99.5891985320217	99.5563685405458	99.5059031866955	99.426508188935	99.2907885005508	99.0123444060176	98.1454914284349
99.6155862856617	99.6118533510022	99.6001082914322	99.5788981119876	99.5452683757341	99.4935841324113	99.4122827488809	99.2732961798025	98.988075062865	98.0998533531823
99.6060288727208	99.6022055774547	99.590174561978	99.5684497613394	99.534009688247	99.4810906476446	99.3978579902526	99.2555609814296	98.9634696578551	98.0535761890655
99.5963348744835	99.592420026418	99.5800992102266	99.5578529370759	99.5225919200021	99.4684221502517	99.3832332804659	99.2375821525092	98.9385270718572	98.0066578258512
99.5865037651434	99.5824961707694	99.5698817020669	99.5471070938708	99.5110145104391	99.4555780551357	99.3684079829759	99.2193589318603	98.9132461996027	97.9590960932249
99.5765350165045	99.5724334810281	99.5595215010566	99.5362116840565	99.4992768964966	99.4425577742174	99.353381457146	99.2008905514676	98.8876259422709	97.9108887703609
99.5664280979701	99.5622314253433	99.5490180684095	99.5251661576072	99.4873785125897	99.4293607164025	99.3381530581836	99.1821762373606	98.8616652023426	97.862033592615
99.5561824765322	99.5518894694835	99.5383708629832	99.5139699621227	99.4753187905869	99.415986287548	99.3227221371148	99.1632152101322	98.8353628800227	97.8125282562078
99.5457976167599	99.541407076825	99.5275793412658	99.5026225428113	99.4630971597872	99.402433890429	99.3070880407813	99.1440066852159	98.808717870749	97.7623704215034
99.5352729807888	99.5307837083402	99.5166429573633	99.4911233424729	99.4507130468961	99.3887029247078	99.2912501118467	99.1245498730075	98.7817290634526	97.7115577153037
99.5246080283094	99.520018822586	99.5055611629861	99.4794718014818	99.438165876003	99.3747927869032	99.2752076888062	99.1048439788854	98.7543953393383	97.6600877324493
99.5138022165556	99.5091118756922	99.494333407436	99.4676673577693	99.4254550685568	99.3607028703622	99.2589601059944	99.0848882031689	98.7267155710251	97.607958036931
99.5028550002937	99.4980623213494	99.4829591375921	99.4557094468066	99.4125800433428	99.3464325652331	99.2425066935899	99.0646817410389	98.6986886219348	97.5551661626543
99.4917658318102	99.4868696107971	99.4714377978977	99.4435975015865	99.3995402164586	99.3319812584394	99.2258467776148	99.044223782437	98.6703133458537	97.5017096139544
99.4805341609007	99.4755331928115	99.4597688303464	99.4313309526061	99.3863350012912	99.3173483336549	99.2089796799292	99.0235135119557	98.6415885866123	97.4475858659337
99.4691594348576	99.4640525136931	99.4479516744676	99.4189092278484	99.3729638084926	99.3025331712794	99.1919047182204	99.0025501087241	98.6125131778478	97.3927923646682
99.4576410984584	99.4524270172547	99.4359857673129	99.4063317527648	99.3594260459568	99.2875351484146	99.1746212059876	98.9813327462947	98.5830859428222	97.3373265273185
99.4459785939537	99.4406561448082	99.4238705434413	99.3935979502561	99.3457211187965	99.2723536388407	99.1571284525222	98.9598605925344	98.5533056942802	97.2811857421698
99.4342805408171	99.4288496219771	99.4117191819796	99.380827263801	99.3319784993445	99.257133768599	99.1395967124382	98.9383476407334	98.5234764772802	97.2249511200422
99.42243762742	99.4168970326943	99.3994178107439	99.3678995526508	99.3180680114234	99.2417296870389	99.1218549375146	98.9165789045345	98.4932926290251	97.168036686832
99.4104492906063	99.4047978129251	99.3869658590041	99.3548142342981	99.3039890541021	99.2261407602723	99.1039024261051	98.8945535311999	98.4627528627083	97.1104399218146
99.3983149646546	99.3925513960951	99.3743627534909	99.3415707236225	99.2897410235832	99.2103663509845	99.0857384720865	98.8722706590151	98.4318559058943	97.0521582386698
99.3860340812654	99.3801572130769	99.3616079183807	99.3281684328713	99.2753233131798	99.1944058184058	99.0673623647214	98.8497294187922	98.4006004926396	96.9931889956086
99.3736060695486	99.3676146921772	99.3487007752802	99.3146067716412	99.2607353132914	99.1782585182788	99.0487733885921	98.8269289347982	98.3689853580197	96.9335295024404
99.3610303560107	99.3549232591229	99.3356407432112	99.3008851468585	99.2459764113804	99.1619238028255	99.0299708235758	98.8038683252994	98.3370092343198	96.8731770255041
99.3483063645419	99.3420823370474	99.3224272385951	99.28700296276	99.2310459919477	99.1454010207142	99.0109539448423	98.780546702851	98.3046708483783	96.812128791105
99.3354335164032	99.3290913464774	99.3090596752368	99.2729596208735	99.2159434365085	99.1286895170288	98.9917220228621	98.7569631744209	98.2719689197278	96.7503819879036
99.3224112302132	99.3159497053185	99.2955374643092	99.2587545199983	99.2006681235675	99.1117886332382	98.9722743234175	98.7331168414074	98.2389021592871	96.6879337685679
99.3092389219349	99.3026568288414	99.2818600143371	99.2443870561855	99.1852194285948	99.0946977071686	98.9526101076118	98.7090067995895	98.2054692684363	96.6247812509038
99.2959160048622	99.2892121296674	99.2680267311805	99.2298566227178	99.1695967240007	99.0774160729763	98.9327286318745	98.6846321390383	98.1716689383541	96.5609215186159
99.2824418896063	99.2756150177548	99.254037018019	99.2151626100898	99.1537993791114	99.0599430611223	98.9126291479615	98.6599919440059	98.1374998495399	96.4963516218033
99.2688159840824	99.2618649003835	99.2398902753349	99.2003044059878	99.137826760144	99.0422779983465	98.8923109029492	98.6350852928031	98.1029606714602	96.4310685772646
99.2550376934954	99.2479611821411	99.2255859008965	99.1852813952692	99.1216782301822	99.0244202076447	98.8717731392234	98.6099112576741	98.0680500622828	96.3650693686639
99.2411064203261	99.2339032649076	99.2111232897411	99.1700929599426	99.1053531491515	99.0063690082433	98.8510150944631	98.5844689046717	98.0327666686712	96.2983509465947
99.2271386434662	99.2198088157196	99.1966238178563	99.1548672031577	99.0889903896338	98.9882800844168	98.8302194510453	98.5589879467872	97.9974371894633	96.2315397294584
99.213017143403	99.2055594295771	99.1819653693473	99.1394752764238	99.0724503209987	98.9699969582464	98.809202636115	98.5332375314421	97.961733053139	96.1640036998831
99.1987413167954	99.1911545025667	99.167147333425	99.1239165556348	99.0557322962086	98.9515189401819	98.7879638751567	98.5072167024961	97.9256528006605	96.0957398989714
99.1843105575328	99.176593428021	99.1521690965141	99.1081904137653	99.0388356649798	98.9328453367992	98.7665023886761	98.4809244941285	97.8891949875663	96.0267452959387
99.1697242567207	99.1618755965027	99.1370300422356	99.09229622085	99.0217597737576	98.913975450771	98.7448173920577	98.4543599324067	97.8523581756586	95.9570167987689
99.1549818026659	99.1470003957895	99.121729551389	99.076233343962	99.0045039656912	98.8949085808337	98.7229080954962	98.4275220362506	97.8151409272242	95.8865512616354
99.1400825808622	99.1319672108578	99.1062670019342	99.0600011471924	98.9870675806085	98.8756440217536	98.7007737039714	98.4004098179932	97.7775418010084	95.8153454900644
99.1250259739745	99.1167754238671	99.0906417689742	99.0435989916276	98.969449954991	98.8561810642933	98.6784134172453	98.3730222836757	97.7395593494028	95.7433962445182
99.1098113618246	99.1014244141439	99.0748532247359	99.0270262353291	98.9516504219479	98.8365189951797	98.6558264298708	98.3453584331662	97.7011921164735	95.6707002428696
99.0944381213752	99.0859135581653	99.0589007385528	99.0102822333108	98.9336683111901	98.8166570970731	98.633011931202	98.3174172601694	97.6624386365697	95.5972541620963
99.078905626715	99.0702422295427	99.0427836768455	98.9933663375179	98.9155029490046	98.7965946485381	98.6099691054034	98.2891977521651	97.6232974333352	95.523054639423
99.0632132490427	99.0544097990052	99.0265014031041	98.9762778968041	98.897153658228	98.7763309240161	98.5866971314542	98.2606988903057	97.5837670189979	95.4480982730704
99.0473603566516	99.0384156343829	99.0100532778685	98.9590162569103	98.8786197582209	98.7558651937985	98.5631951831463	98.2319196492911	97.5438458938516	95.3723816227238
99.0313463149133	99.0222591005902	98.9934386587098	98.9415807604421	98.8599005648415	98.7351967240007	98.5394624290771	98.202858997232	97.5035325458706	95.295901209798
99.0151704862619	99.0059395596085	98.9766569002114	98.923970746847	98.8409953904196	98.7143247765369	98.5154980326358	98.1735158955097	97.4628254504156	95.2186535175547
98.9988322301776	98.9894563704693	98.9597073539491	98.9061855523923	98.8219035437304	98.6932486090949	98.4913011519834	98.1438892986371	97.4217230700034	95.1406349911098
98.9823309031704	98.9728088892365	98.9425893684724	98.8882245101423	98.8026243299688	98.6719674751114	98.4668709400293	98.1139781541239	97.3802238541194	95.0618420373589
98.9657919843317	98.956123877222	98.9254337074219	98.8702256427662	98.7833073933175	98.6506491649757	98.4424043441227	98.0840302515336	97.3386806463971	94.9829539862951
98.9490891979751	98.9392737797987	98.9081088115658	98.8520501235057	98.7638022642228	98.6291250099628	98.4177034113789	98.0537964917778	97.2967384294893	94.9032850111811
98.932221894257	98.9222579466634	98.8906140229524	98.8336972784772	98.7441082399014	98.6073942535595	98.3927672811197	98.023275797781	97.2543955398166	94.8228316069109
98.9151894203101	98.9050757244896	98.8729486805392	98.8151664305167	98.724224613897	98.5854561348901	98.3675950871065	97.9924670818153	97.2116503282173	94.7415901887747
98.8979911202257	98.8877264569098	98.8551121201723	98.7964568991569	98.7041506760542	98.563309888685	98.3421859573863	97.9613692471427	97.168501151198	94.6595571036133
98.8806263350367	98.8702094844969	98.8371036745665	98.7775680006036	98.6838857124911	98.5409547452452	98.3165390142161	97.929981189024	97.1249463648453	94.576728637562
98.8630944027003	98.8525241447462	98.8189226732847	98.7584990477119	98.6634290055729	98.5183899304048	98.2906533740319	97.8983017953037	97.0809843205791	94.4931010214138
98.8453946580804	98.8346697720564	98.8005684427172	98.7392493499632	98.6427798338846	98.4956146654956	98.2645281474425	97.866329946714	97.0366133621814	94.4086704343174
98.8275264329299	98.8166456977109	98.7820403060609	98.7198182134406	98.6219374722034	98.4726281673109	98.2381624392345	97.8340645169962	96.9918318237064	94.3234330063041
98.8094890558727	98.7984512498591	98.7633375832985	98.7002049408054	98.6009011914705	98.449429648073	98.2115553483798	97.801504372904	96.9466380280018	94.237384819992
98.7912818523856	98.7800857534971	98.7444595911769	98.6804088312731	98.5796702587638	98.4260183154001	98.1847059680414	97.7686483741342	96.9010302856523	94.1505219117061
98.7729041447801	98.7615485304486	98.7254056431867	98.6604291805884	98.5582439372691	98.4023933722767	98.157613385574	97.7354953732133	96.8550068942153	94.0628402721832
98.754355252184	98.7428388993452	98.7061750495398	98.6402652810016	98.5366214862525	98.3785540170232	98.1302766825188	97.7020442153591	96.8085661376588	93.9743358469801
98.7356344905227	98.7239561756069	98.6867671171484	98.6199164212433	98.5148021610316	98.3544994432676	98.1026949345921	97.6682937383316	96.761706285938	93.8850045366649
98.7167411725003	98.7048996714227	98.6671811496033	98.5993818865001	98.4927852129473	98.3302288399166	98.074867211667	97.6342427722785	96.7144255946688	93.7948421968516
98.6976746075808	98.6856686957301	98.6474164471511	98.5786609583892	98.470569889336	98.3057413911282	98.0467925777495	97.599890139583	96.666722304867	93.7038446381178
98.6784341019689	98.6662625541951	98.6274723066732	98.5577529149338	98.4481554335004	98.2810362762835	98.0184700909491	97.5652346547144	96.6185946427323	93.6120076258342
98.6591548045384	98.6468177792283	98.607489579313	98.5368064404086	98.4257030720792	98.2562943126185	97.9901120663198	97.5305436201691	96.5704237963986	93.520068666814
98.6397007083314	98.6271969837793	98.5873265556145	98.5156719790862	98.4030506754089	98.2313337079376	97.9615050537438	97.4955482328911	96.5218260646185	93.4272827149742
98.6200711125624	98.6073994664656	98.56698252518	98.4943488011246	98.3801974777355	98.2061536303988	97.9326480961192	97.4602472801324	96.4727995527404	93.333645616473
98.6002653131234	98.5874245225682	98.5464567741727	98.4728361730019	98.3571427091714	98.1807532432608	97.9035402301107	97.4246395374162	96.4233423799349	93.2391531284343
98.5802826025638	98.5672714440108	98.5257485852937	98.4511333574911	98.3338855956666	98.155131704847	97.8741804859863	97.3887237702411	96.3734526700266	93.143800930562
98.56012227007	98.5469395193385	98.5048572377593	98.4292396136341	98.310425358979	98.1292881685064	97.8445678875344	97.3524987351237	96.3231285451077	93.047584633174
98.5397836014458	98.5264280336964	98.4837820072773	98.4071541967155	98.2867612166452	98.1032217825729	97.8147014520281	97.315963180198	96.272368121076	92.9504997827342
98.5192658790912	98.5057362688087	98.4625221660239	98.3848763582363	98.2628923819504	98.0769316903247	97.7845801902148	97.2791158455228	96.2211695045066	92.8525418656326
98.4985683819825	98.4848635029562	98.4410769826198	98.3624053458874	98.2388180638978	98.0504170299455	97.754203106317	97.2419554631973	96.1695307904448	92.7537063107355
98.4776903856507	98.463809010955	98.4194457221068	98.3397404035231	98.2145374671782	98.0236769344869	97.7235691980365	97.2044807573549	96.1174500608382	92.6539884910673
98.4566311621611	98.4425720641347	98.3976276459236	98.3168807711343	98.1900497921391	97.9967105318328	97.692677456555	97.1666904440793	96.0649253834094	92.5533837248776
98.4353899800918	98.4211519303153	98.3756220118815	98.293825684821	98.1653542347535	97.9695169446645	97.6615268665313	97.1285832312764	96.0119548108354	92.4518872762701
98.4139661045122	98.3995478737858	98.3534280741403	98.2705743767658	98.1404499865886	97.9420952904273	97.6301164060903	97.0901578185192	95.9585363801364	92.3494943555161
98.3923587969614	98.3777591552809	98.3310450831839	98.2471260752059	98.115336234775	97.914444681298	97.5984450468065	97.0514128968814	95.9046681122108	92.2462001191393
98.3705673154265	98.3557850319587	98.3084722857952	98.2234800044059	98.0900121619746	97.8865642241525	97.56651175368	97.0123471487657	95.8503480114712	92.141999669832
98.3485909143204	98.3336247573775	98.2857089250316	98.1996353846297	98.0644769463498	97.8584530205335	97.5343154851063	96.9729592477341	95.7955740655477	92.0368880562472
98.3264288444595	98.3112775814726	98.2627542401994	98.1755914321128	98.0387297615314	97.8301101666187	97.5018551928404	96.9332478583415	95.7403442450395	91.9308602726947
98.3044306189622	98.2890965926605	98.2399724927463	98.1517326807192	98.0131876162001	97.8020034313771	97.469680346043	96.8939053169477	95.6856477300617	91.8258427687134
98.2824512357488	98.2669353119019	98.2172125777277	98.1278996253683	97.9876775367232	97.7739387648027	97.4375629261897	96.8546441146882	95.6310731265244	91.7210309887736
98.2604907103368	98.2447937604284	98.1944745265931	98.1040923115847	97.9621995837249	97.7459162361269	97.4055029864615	96.8154642075238	95.5766198529785	91.6164226806676
98.2385490585038	98.222671959676	98.1717583709453	98.0803107849084	97.9367538175039	97.7179359134216	97.3735005762302	96.7763655294222	95.5222872746351	91.5120157586813
98.2166262962841	98.2005699312843	98.1490641425371	98.056555090888	97.911340298018	97.6899978635389	97.3415557404602	96.7373479920719	95.468074723535	91.4078082705156
98.1947224399663	98.1784876970952	98.1263918732675	98.0328252750736	97.8859590848666	97.6621021520337	97.3096685191485	96.6984114855971	95.413981512425	91.3037983729443
98.1728375060902	98.1564252791515	98.1037415951787	98.0091213830092	97.8606102372716	97.6342488430716	97.277838946838	96.6595558798464	95.3600069442763	91.1999843136799
98.1509715114442	98.1343826996959	98.0811133404523	97.9854434602255	97.8352938140572	97.6064379993264	97.2460670522209	96.6207810259765	95.3061503187837	91.096364417678
98.1291244730626	98.1123599811689	98.0585071414056	97.9617915522316	97.8100098736264	97.5786696818694	97.214352857836	96.5820867581524	95.2524109367753	90.9929370766352
98.107296408223	98.0903571462079	98.0359230304882	97.938165704507	97.7847584739362	97.5509439500567	97.1826963798554	96.5434728952521	95.1987881031762	90.8897007408047
98.0854873344438	98.0683742176451	98.0133610402782	97.914565962493	97.7595396724702	97.5232608614149	97.1510976279537	96.5049392425074	95.1452811289709	90.7866539125098
98.0636972694817	98.0464112185059	97.9908212034782	97.8909923715837	97.7343535262086	97.4956204715307	97.1195566052491	96.466485593045	95.0918893324754	90.6837951409159
98.0419262313293	98.0244681720073	97.9683035529114	97.8674449771166	97.7092000915971	97.4680228339444	97.0880733083074	96.4281117293074	95.0386120401312	90.5811230177438
98.0201742382124	98.0025451015557	97.9458081215174	97.8439238243622	97.6840794245135	97.4404680000506	97.0566477271984	96.3898174243485	94.9854485869722	90.4786361737003
97.9984413085882	97.9806420307453	97.9233349423485	97.820428958514	97.6589915802336	97.4129560190067	97.0252798455942	96.3516024430047	94.9323983168654	90.3763332754596
97.9767274611422	97.9587589833557	97.9008840485648	97.7969604246769	97.6339366133951	97.3854869376501	96.993969640904	96.3134665429469	94.8794605825992	90.2742130230775
97.9550327147864	97.9368959833501	97.8784554734298	97.7735182678562	97.6089145779615	97.3580608004247	96.9627170844347	96.2754094756221	94.8266347458661	90.1722741477474
97.9333570886568	97.915053054873	97.8560492503063	97.7501025329448	97.5839255271857	97.3306776493175	96.9315221415728	96.237430987093	94.7739201771771	90.0705154098331
97.9117006021109	97.8932302222479	97.8336654126509	97.7267132647109	97.5589695135728	97.3033375238041	96.900384771982	96.1995308187863	94.7213162557299	89.9689355971275
97.8900632747258	97.871427509975	97.8113039940095	97.7033505077845	97.5340465888439	97.2760404608043	96.869304929811	96.1617087081575	94.6688223692478	89.8675335232993
97.8684451262955	97.8496449427289	97.788965028012	97.6800143066443	97.5091568039	97.2487864946465	96.8382825639085	96.1239643892821	94.6164379138007	89.7663080264961
97.8468461768287	97.8278825453559	97.7666485483668	97.6567047056027	97.4843002087864	97.2215756570414	96.8073176180424	96.0862975933806	94.5641622936164	89.6652579680829
97.8252664465464	97.8061403428715	97.7443545888556	97.6334217487922	97.4594768526585	97.1944079770634	96.7764100311189	96.0487080492856	94.5119949208873	89.5643822314943
97.80370595588	97.7844183604578	97.7220831833276	97.6101654801499	97.434686783749	97.1672834811402	96.7455597374015	96.0111954838562	94.4599352155761	89.4636797211868
97.7821647254684	97.7627166234606	97.699834365693	97.5869359434027	97.4099300493352	97.1402021930495	96.7147666667274	95.9737596223469	94.4079826052228	89.3631493616785
97.7606427761558	97.7410351573869	97.6776081699179	97.5637331820515	97.3852066957092	97.1131641339227	96.684030744719	95.936400188736	94.3561365247558	89.2627900966646
97.7391401289896	97.7193739879013	97.655404630017	97.5405572393561	97.3605167681486	97.0861693222542	96.6533518929916	95.8991169060171	94.3043964163068	89.162600888202
97.7176568052175	97.6977331408237	97.6332237800478	97.5174081583193	97.3358603108894	97.0592177739167	96.6227300293544	95.8619094964598	94.2527617290302	89.0625807159528
97.6961928262858	97.6761126421255	97.6110656541032	97.4942859816706	97.3112373671008	97.0323095021813	96.5921650680053	95.8247776818417	94.2012319189293	88.9627285764833
97.6747482138359	97.6545125179271	97.5889302863054	97.4711907518509	97.286647978861	97.0054445177425	96.5616569197194	95.787721183655	94.1498064486862	88.8630434826102
97.6533229897028	97.6329327944939	97.5668177107979	97.4481225109966	97.2620921871355	96.9786228287464	96.5312054920305	95.7507397232913	94.0984847874994	88.763524462792
97.6319171759122	97.611373498233	97.5447279617394	97.4250813009234	97.2375700317571	96.9518444408232	96.5008106894045	95.7138330222068	94.047266410925	88.6641705605589
97.6105307946776	97.5898346556902	97.5226610732951	97.4020671631109	97.2130815514076	96.9251093571227	96.4704724134075	95.6770008020694	93.996150800725	88.564980833979
97.5891638683982	97.5683162935455	97.5006170796301	97.379080138687	97.188626783601	96.8984175783522	96.440190562865	95.6402427848907	93.9451374447202	88.4659543551577
97.567816419656	97.5468184386103	97.4785960149013	97.3561202684127	97.1642057646695	96.8717691028168	96.4099650340152	95.6035586931436	93.8942258366482	88.3670902097664
97.546488471213	97.5253411178226	97.4565979132497	97.3331875926666	97.13981852975	96.8451639264619	96.3797957206554	95.5669482498678	93.8434154760271	88.2683874965989
97.5251800460085	97.5038843582439	97.4346228087921	97.3102821514307	97.1154651127734	96.818602042917	96.3496825142807	95.5304111787644	93.7927058680231	88.169845327153
97.5038911671567	97.4824481870545	97.4126707356136	97.2874039842753	97.0911455464546	96.7920834435415	96.319625304218	95.4939472042796	93.742096523324	88.0714628252348
97.4826218579429	97.4610326315498	97.390741727759	97.264553130345	97.0668598622851	96.7656081174706	96.2896239777518	95.4575560516806	93.691586958016	87.9732391265848
97.4613721418217	97.4396377191356	97.3688358192246	97.241729628345	97.0426080905262	96.739176051663	96.2596784202453	95.4212374471227	93.6411766934652	87.8751733785228
97.4401420424131	97.4182634773244	97.34695304395	97.2189335165274	97.0183902602046	96.7127872309485	96.2297885152553	95.38499111771	93.5908652562039	87.7772647396122
97.4189315835	97.3969099337302	97.3250934358099	97.1961648326787	96.994206399109	96.6864416380767	96.1999541446411	95.3488167915484	93.5406521778196	87.6795123793399
97.3977407890247	97.3755771160644	97.3032570286053	97.1734236141065	96.9700565337876	96.6601392537655	96.1701751886688	95.3127141977945	93.4905369948487	87.5819154778127
97.3765696830861	97.3542650521312	97.2814438560551	97.1507098976278	96.9459406895482	96.6338800567495	96.1404515261103	95.2766830666974	93.4405192486733	87.4844732254675
97.3554182899363	97.3329737698225	97.2596539517882	97.1280237195573	96.921858890458	96.6076640238294	96.1107830343368	95.2407231296372	93.3905984854219	87.3871848227958
97.3342866339771	97.3117032971135	97.2378873493342	97.1053651156958	96.897811159346	96.5814911299196	96.0811695894083	95.2048341191585	93.3407742558731	87.2900494800803
97.3131747397569	97.2904536620575	97.2161440821157	97.08273412132	96.8737975178053	96.5553613480972	96.0516110661591	95.1690157690002	93.2910461153623	87.1930664171432
97.2920826319672	97.2692248927809	97.1944241834393	97.0601307711719	96.8498179861974	96.5292746496493	96.0221073382776	95.1332678141217	93.2414136236916	87.0962348631061
97.271010335439	97.2480170174786	97.1727276864875	97.0375550994491	96.825872583657	96.5032310041208	95.992658278384	95.0975899907262	93.1918763450429	86.9995540561597
97.2499578751392	97.2268300644081	97.1510546243103	97.0150071397954	96.8019613280978	96.4772303793609	95.9632637581026	95.0619820362811	93.1424338478932	86.9030232433433
97.2289252761671	97.205664061885	97.129405029817	96.9924869252924	96.7780842362191	96.4512727415696	95.9339236481315	95.026443689535	93.0930857049329	86.8066416803337
97.2079125637504	97.1845190382772	97.1077789357676	96.9699944884507	96.7542413235136	96.4253580553432	95.9046378183085	94.9909746905334	93.0438314929865	86.7104086312424
97.1869197632419	97.163395022	97.0861763747649	96.9475298612027	96.7304326042753	96.3994862837192	95.8754061376736	94.9555747806318	92.9946707929358	86.6143233684208
97.1659469001149	97.1422920415105	97.0645973792466	96.9250930748946	96.7066580916087	96.3736573882203	95.8462284745289	94.9202437025067	92.9456031896453	86.5183851722731
97.1449939999601	97.1212101253019	97.0430419814769	96.9026841602803	96.6829177974381	96.3478713288982	95.817104696495	94.8849812001647	92.8966282718901	86.4225933310768
97.124061088481	97.1001493018986	97.0215102135389	96.8803031475146	96.6592117325181	96.3221280643758	95.7880346705652	94.8497870189506	92.8477456322857	86.3269471408089
97.10314819149	97.0791095998502	97.0000021073268	96.8579500661473	96.6355399064442	96.2964275518891	95.7590182631566	94.8146609055534	92.7989548672196	86.2314459049798
97.0822553349044	97.0580910477258	96.9785176945381	96.8356249451183	96.6119023276641	96.2707697473282	95.7300553401588	94.7796026080109	92.7502555767858	86.1360889344724
97.061382544742	97.0370936741092	96.9570570066662	96.8133278127519	96.588299003489	96.2451546052774	95.7011457669805	94.7446118757137	92.70164736472	86.0408755473873
97.0405298471171	97.0161175075921	96.935620074993	96.791058696753	96.5647299401062	96.2195820790542	95.6722894085935	94.7096884594077	92.6531298383373	85.9458050688931
97.0196972682359	96.9951625767695	96.9142069305816	96.7688176242028	96.5411951425911	96.1940521207481	95.6434861295748	94.674832111195	92.604702608472	85.8508768310825
96.9988848343924	96.9742289102334	96.892817604269	96.7466046215549	96.5176946149205	96.1685646812577	95.6147357941467	94.6400425845351	92.5563652894178	85.7560901728329
96.9780925719638	96.9533165365673	96.8714521266597	96.7244197146326	96.494228359985	96.1431197103277	95.5860382662146	94.605319634244	92.508117498871	85.6614444396716
96.9573205074059	96.9324254843402	96.850110528118	96.7022629286254	96.470796379603	96.1177171565845	95.5573934094033	94.5706630164935	92.4599588578746	85.5669389836456
96.9365686672489	96.9115557821016	96.8287928387622	96.6801342880874	96.4473986745338	96.0923569675713	95.5288010870918	94.536072488809	92.4118889907635	85.4725731631958
96.9158370780925	96.8907074583749	96.8074990884575	96.6580338169347	96.4240352444918	96.0670390897821	95.5002611624458	94.5015478100675	92.3639075251122	85.3783463430351
96.8951257666016	96.8698805416523	96.78622930681	96.635961538444	96.4007060881598	96.0417634686951	95.4717734984491	94.4670887404938	92.316014091683	85.2842578940301
96.874434759501	96.8490750603888	96.7649835231602	96.6139174752509	96.377411203204	96.0165300488052	95.4433379579334	94.4326950416574	92.2682083243755	85.1903071930871
96.8537640835713	96.8282910429968	96.7437617665774	96.5919016493497	96.3541505862872	95.9913387736555	95.4149544036068	94.3983664764685	92.2204898601782	85.0964936230408
96.8331137656441	96.80752851784	96.7225640658533	96.5699140820921	96.330924233084	95.9661895858683	95.3866226980806	94.364102809173	92.1728583391206	85.0028165725473
96.8124838325967	96.7867875132278	96.701390449497	96.5479547941873	96.3077321382946	95.9410824271751	95.3583427038954	94.3299038053477	92.1253134042263	84.9092754359795
96.7918743113475	96.7660680574102	96.6802409457288	96.5260238057016	96.2845742956594	95.916017238446	95.3301142835453	94.2957692318951	92.0778547014685	84.8158696133258
96.7712852288516	96.7453701785716	96.6591155824756	96.5041211360594	96.2614506979736	95.890993959718	95.3019372995013	94.2616988570375	92.0304818797249	84.7225985100924
96.750716612095	96.7246939048252	96.638014387365	96.4822468040431	96.2383613371017	95.8660125302233	95.2738116142339	94.2276924503113	91.9831945907352	84.6294615372071
96.7301684880904	96.7040392642079	96.6169373877208	96.4604008277946	96.2153062039915	95.8410728884158	95.2457370902341	94.1937497825603	91.9359924890586	84.5364581109275
96.7096408838721	96.6834062846745	96.5958846105581	96.438583224816	96.1922852886892	95.8161749719977	95.2177135900337	94.1598706259298	91.8888752320328	84.4435876527499
96.6891338264907	96.6627949940923	96.5748560825784	96.416794011971	96.1692985803537	95.7913187179454	95.1897409762243	94.1260547538593	91.8418424797337	84.3508495893225
96.6686473430085	96.6422054202354	96.5538518301658	96.3950332054873	96.1463460672706	95.7665040625342	95.1618191114762	94.092301941076	91.7948938949364	84.2582433523597
96.6481814604943	96.6216375907798	96.5328718793818	96.3733008209573	96.1234277368671	95.7417309413625	95.1339478585556	94.0586119635872	91.7480291430768	84.1657683785594
96.6277362060182	96.6010915332977	96.5119162559618	96.3515968733413	96.1005435757258	95.7169992893759	95.1061270803412	94.0249845986736	91.701247892214	84.0734241095221
96.6073116066472	96.5805672752524	96.4909849853109	96.329921376969	96.0776935695992	95.6923090408898	95.0783566398404	93.9914196248816	91.6545498129938	83.9812099916727
96.5869076894395	96.5600648439929	96.4700780925003	96.3082743455428	96.0548777034239	95.6676601296121	95.0506364002041	93.9579168220155	91.607934578613	83.8891254761833
96.5665244814397	96.5395842667492	96.4491956022635	96.2866557921397	96.0320959613343	95.6430524886648	95.0229662247415	93.9244759711304	91.5614018647842	83.7971700188994
96.5461620096739	96.5191255706263	96.4283375389928	96.2650657292149	96.0093483266766	95.6184860506055	94.9953459769336	93.891096854524	91.5149513497018	83.7053430802668
96.5258203011445	96.4986887826001	96.4075039267364	96.2435041686043	95.9866347820229	95.5939607474476	94.9677755204465	93.857779255729	91.4685827140085	83.6136441252606
96.5054993828254	96.478273929512	96.3866947891945	96.2219711215283	95.9639553091847	95.5694765106806	94.9402547191437	93.8245229595048	91.4222956407621	83.5220726233168
96.4851992816564	96.4578810380638	96.3659101497172	96.2004665985948	95.9413098892262	95.54503327129	94.912783437098	93.7913277518303	91.3760898154042	83.4306280482642
96.4649200245391	96.4375101348132	96.3451500313009	96.1789906098026	95.9186985024783	95.5206309597756	94.8853615386031	93.7581934198951	91.329964925728	83.3393098782591
96.4446616383311	96.417161246169	96.3244144565865	96.1575431645457	95.8961211285515	95.4962695061705	94.8579888881842	93.7251197520916	91.2839206618484	83.2481175957211
96.4244241498415	96.396834398386	96.3037034478558	96.1361242716164	95.8735777463491	95.4719488400589	94.8306653506082	93.6921065380072	91.2379567161711	83.1570506872705
96.4042075858256	96.3765296175609	96.28301702703	96.1147339392098	95.8510683340804	95.4476688905934	94.8033907908936	93.659153568416	91.1920727833638	83.0661086436671
96.3840119729805	96.3562469296275	96.2623552156673	96.0933721749274	95.8285928692735	95.4234295865125	94.7761650743197	93.6262606352704	91.1462685603267	82.9752909597504
96.3638373379394	96.3359863603522	96.2417180349604	96.0720389857816	95.8061513287882	95.3992308561567	94.7489880664357	93.5934275316935	91.1005437461648	82.8845971343816
96.3436837072675	96.3157479353295	96.221105505735	96.0507343781995	95.7837436888283	95.3750726274846	94.7218596330688	93.5606540519701	91.05489804216	82.7940266703864
96.3235511074567	96.2955316799779	96.2005176484479	96.0294583580278	95.761369924954	95.350954828089	94.6947796403324	93.5279399915394	91.0093311517436	82.7035790744994
96.3034395649207	96.2753376195357	96.1799544831853	96.0082109305368	95.7390300120947	95.3268773852114	94.6677479546339	93.4952851469863	90.9638427804701	82.6132538573094
96.2833491059907	96.2551657790565	96.1594160296612	95.9869921004253	95.7167239245606	95.3028402257575	94.6407644426814	93.4626893160334	90.9184326359909	82.5230505332067
96.2632797569102	96.2350161834054	96.138902307216	95.9658018718248	95.6944516360548	95.2788432763112	94.6138289714911	93.4301522975328	90.8731004280286	82.4329686203305
96.2432315438303	96.214888857255	96.1184133348153	95.9446402483041	95.6722131196852	95.2548864631486	94.5869414083937	93.3976738914581	90.827845868352	82.3430076405182
96.2232044928053	96.1947838250813	96.0979491310488	95.9235072328745	95.6500083479762	95.230969712252	94.5601016210404	93.3652538988959	90.7826686707517	82.2531671192559
96.2031986297879	96.1747011111601	96.077509714129	95.9024028279943	95.6278372928801	95.2070929493224	94.5333094774089	93.3328921220385	90.7375685510153	82.163446585629
96.1832139806246	96.154640739563	96.0570951018907	95.8813270355736	95.6056999257882	95.1832560997934	94.5065648458093	93.300588364175	90.6925452269043	82.073845572275
96.1632505710512	96.1346027341538	96.0367053117897	95.860279856979	95.5835962175425	95.1594590888427	94.4798675948888	93.2683424296837	90.6475984181305	81.9843636153367
96.1433084266882	96.1145871185852	96.0163403609026	95.8392612930389	95.5615261384462	95.1357018414049	94.4532175936371	93.2361541240243	90.6027278463332	81.8950002544161
96.1233875730365	96.094593916295	95.9960002659258	95.8182713440484	95.5394896582749	95.1119842821834	94.4266147113912	93.2040232537295	90.557933235057	81.8057550325301
96.103488035473	96.0746231505025	95.9756850431751	95.797310009774	95.5174867462871	95.0883063356615	94.4000588178396	93.1719496263975	90.5132143097293	81.7166274960664
96.0836098392461	96.0546748442057	95.9553947085859	95.7763772894587	95.4955173712346	95.064667926114	94.3735497830265	93.1399330506837	90.4685707976392	81.6276171947405
96.0637530094715	96.0347490201778	95.9351292777119	95.7554731818274	95.4735815013733	95.0410689776179	94.3470874773564	93.1079733362934	90.4240024279158	81.5387236815536
96.0439175711281	96.0148457009639	95.9148887657259	95.7345976850914	95.4516791044732	95.0175094140631	94.3206717715973	93.0760702939736	90.3795089315076	81.4499465127511
96.0241035490536	95.9949649088779	95.894673187419	95.7137507969541	95.429810147828	94.9939891591625	94.2943025368844	93.0442237355054	90.3350900411623	81.3612852477828
96.0043109679404	95.975106666	95.8744825572012	95.6929325146155	95.407974598266	94.9705081364624	94.2679796447234	93.0124334736965	90.2907454914057	81.2727394492622
95.9845398523317	95.955270994173	95.8543168891011	95.672142834778	95.3861724221588	94.9470662693522	94.241702966994	92.9806993223732	90.2464750185232	81.1843086829287
95.9647902266175	95.9354579150003	95.8341761967662	95.6513817536506	95.3644035854316	94.9236634810733	94.2154723759525	92.9490210963732	90.2022783605392	81.0959925176087
95.9450621150303	95.9156674498425	95.8140604934631	95.6306492669551	95.3426680535725	94.9002996947294	94.1892877442346	92.9173986115378	90.1581552571988	81.0077905251783
95.9253555416417	95.895899619815	95.7939697920781	95.6099453699304	95.3209657916413	94.8769748332943	94.1631489448584	92.8858316847045	90.1141054499484	80.9197022805267
95.9056705303583	95.8761544457856	95.7739041051176	95.5892700573378	95.2992967642794	94.8536888196216	94.1370558512263	92.8543201336996	90.0701286819179	80.8317273615205
95.8860071049181	95.8564319483714	95.7538634447082	95.5686233234665	95.2776609357184	94.8304415764527	94.1110083371276	92.8228637773307	90.0262246979018	80.7438653489676
95.8663652888865	95.8367321479373	95.7338478225978	95.5480051621384	95.2560582697887	94.807233026425	94.0850062767407	92.7914624353797	89.982393244342	80.6561158265831
95.8467451056531	95.8170550645926	95.7138572501559	95.5274155667133	95.2344887299288	94.7840630920805	94.0590495446347	92.7601159285951	89.9386340693098	80.5684783809553
95.8271465784279	95.7974007181897	95.6938917383747	95.5068545300938	95.2129522791935	94.7609316958728	94.0331380157717	92.7288240786851	89.8949469224888	80.4809526015116
95.8075697302378	95.7777691283213	95.6739512978696	95.486322044731	95.191448880262	94.7378387601753	94.0072715655082	92.6975867083104	89.8513315551578	80.3935380804865
95.7880145839233	95.7581603143186	95.6540359388799	95.4658181026286	95.169978495447	94.7147842072884	93.9814500695967	92.666403641077	89.8077877201742	80.3062344128888
95.7684811621349	95.7385742952489	95.6341456712704	95.4453426953491	95.1485410867021	94.6917679594469	93.9556734041871	92.6352747015292	89.7643151719577	80.2190411964702
95.7489694873303	95.7190110899142	95.6142805045316	95.4248958140179	95.1271366156301	94.6687899388266	93.9299414458282	92.6041997151426	89.7209136664736	80.1319580316942
95.7294795817704	95.6994707168489	95.5944404477814	95.4044774493288	95.1057650434909	94.6458500675512	93.9042540714687	92.5731785083173	89.6775829612173	80.0449845217052
95.710011467517	95.6799531943181	95.5746255097656	95.384087591549	95.0844263312091	94.6229482676993	93.8786111584585	92.5422109083708	89.6343228151986	79.958120272299
95.6905651664292	95.660458540316	95.5548356988595	95.3637262305238	95.0631204393817	94.6000844613105	93.8530125845493	92.5112967435313	89.5911329889261	79.871364891893
95.6711407001603	95.6409867725641	95.5350710230692	95.3433933556821	95.0418473282856	94.5772585703915	93.827458227896	92.4804358429311	89.548013244392	79.7847179914972
95.6517380901554	95.6215379085097	95.5153314900323	95.3230889560406	95.0206069578848	94.5544705169227	93.8019479670571	92.4496280365996	89.5049633450574	79.6981791846857
95.6323573576477	95.6021119653243	95.4956171070198	95.3028130202093	94.9993992878377	94.5317202228638	93.7764816809953	92.4188731554568	89.4619830558371	79.611748087569
95.6129985236567	95.5827089599023	95.475927880937	95.2825655363963	94.9782242775044	94.5090076101593	93.7510592490786	92.3881710313068	89.4190721430857	79.5254243187658
95.5936616089844	95.5633289088596	95.4562638183254	95.2623464924124	94.9570818859532	94.4863326007447	93.7256805510801	92.357521496831	89.3762303745828	79.4392074993767
95.5743466342136	95.5439718285321	95.4366249253635	95.242155875676	94.935972071968	94.4636951165516	93.7003454671792	92.326924385582	89.3334575195191	79.353097252957
95.5550536197045	95.5246377349748	95.4170112078689	95.2219936732182	94.9148947940545	94.4410950795127	93.6750538779612	92.2963795319768	89.2907533484827	79.2670932054907
95.5357825855927	95.5053266439604	95.3974226712994	95.2018598716871	94.8938500104472	94.4185324115677	93.6498056644181	92.2658867712907	89.2481176334451	79.1811949853647
95.5165335517863	95.4860385709781	95.377859320755	95.1817544573529	94.8728376791159	94.3960070346677	93.6246007079485	92.2354459396507	89.2055501477481	79.0954022233436
95.4973065379641	95.4667735312331	95.3583211609789	95.1616774161124	94.8518577577718	94.3735188707801	93.5994388903577	92.2050568740299	89.1630506660904	79.0097145525444
95.4781015635726	95.447531539645	95.3388081963598	95.1416287334937	94.8309102038739	94.3510678418938	93.574320093858	92.1747194122402	89.1206189645145	78.9241316084125
95.4589186478243	95.4283126108472	95.3193204309329	95.1216083946611	94.8099949746354	94.3286538700231	93.5492442010684	92.1444333929272	89.0782548203939	78.838653028697
95.4397578096949	95.409116759186	95.2998578683824	95.1016163844192	94.7891120270293	94.3062768772128	93.5242110950147	92.1141986555637	89.0359580124202	78.7532784534275
95.4206190679219	95.3899439987199	95.2804205120423	95.0816526872177	94.7682613177948	94.2839367855423	93.4992206591292	92.0840150404434	88.9937283205911	78.6680075248901
95.401502441002	95.3707943432188	95.2610083648989	95.0617172871562	94.747442803443	94.2616335171297	93.4742727772507	92.0538823886754	88.9515655261974	78.5828398876049
95.3824079471891	95.3516678061633	95.2416214295925	95.0418101679882	94.7266564402623	94.2393669941362	93.449367333624	92.023800542178	88.9094694118116	78.4977751883031
95.3633356044929	95.3325644007442	95.2222597084186	95.0219313131258	94.7059021843248	94.2171371387697	93.4245042128997	91.9937693436727	88.8674397612751	78.4128130759047
95.3442854306764	95.3134841398619	95.2029232033307	95.0020807056444	94.6851799914908	94.1949438732891	93.399683300134	91.9637886366788	88.825476359687	78.3279532014964
95.3252574432545	95.2944270361259	95.1836119159414	94.9822583282864	94.6644898174153	94.1727871200079	93.3749044807879	91.9338582655072	88.7835789933924	78.2431952183104
95.3062516594921	95.2753931018542	95.1643258475245	94.9624641634662	94.6438316175526	94.1506668012977	93.3501676407272	91.9039780752548	88.7417474499706	78.1585387817026
95.2872680964024	95.2563823490735	95.1450649990172	94.942698193274	94.6232053471619	94.1285828395921	93.3254726662216	91.8741479117989	88.699981518224	78.0739835491318
95.2683067707456	95.2373947895179	95.1258293710216	94.9229603994807	94.6026109613123	94.1065351573897	93.3008194439443	91.8443676217917	88.6582809881669	77.9895291801392
95.2493676990269	95.2184304346297	95.106618963807	94.9032507635412	94.5820484148879	94.084523677258	93.2762078609715	91.8146370526543	88.6166456510144	77.9051753363278
95.2304508974953	95.1994892955584	95.0874337773115	94.8835692665995	94.5615176625929	94.0625483218363	93.2516378047815	91.7849560525718	88.5750752991717	77.8209216813424
95.2115563821422	95.1805713831608	95.0682738111446	94.8639158894923	94.5410186589563	94.0406090138391	93.2271091632544	91.7553244704872	88.5335697262232	77.7367678808498
95.1926841687	95.1616767080009	95.0491390645885	94.8442906127535	94.5205513583367	94.0187056760588	93.202621824671	91.7257421560964	88.492128726922	77.6527136025195
95.1738342726405	95.1428052803498	95.0300295366004	94.8246934166177	94.5001157149273	93.9968382313693	93.1781756777124	91.6962089598427	88.4507520971795	77.5687585160043
95.1550067091743	95.1239571101858	95.010945225815	94.8051242810249	94.4797116827601	93.9750066027283	93.153770611459	91.6667247329115	88.4094396340549	77.4849022929214
95.136201493249	95.1051322071938	94.9918861305455	94.7855831856239	94.4593392157108	93.9532107131805	93.1294065153898	91.6372893272249	88.3681911357454	77.401144606834
95.1174186395485	95.0863305807665	94.9728522487868	94.7660701097769	94.4389982675029	93.9314504858602	93.1050832793814	91.6079025954367	88.3270064015758	77.3174851332324
95.0986581624916	95.0675522400032	94.9538435782168	94.7465850325627	94.4186887917125	93.9097258439941	93.0808007937073	91.5785643909269	88.2858852319889	77.2339235495166
95.0799200762313	95.0487971937112	94.9348601161988	94.7271279327812	94.3984107417723	93.8880367109036	93.0565589490369	91.5492745677971	88.2448274285355	77.1504595349779
95.0612043946537	95.0300654504049	94.9159018597835	94.7076987889568	94.3781640709759	93.8663830100078	93.0323576364346	91.5200329808648	88.2038327938648	77.0670927707811
95.042511131377	95.0113570183069	94.8969688057111	94.6882975793425	94.3579487324819	93.8447646648253	93.008196747359	91.4908394856587	88.162901131715	76.9838229399481
95.0238402997511	94.9926719053476	94.8780609504136	94.6689242819235	94.3377646793182	93.823181598977	92.9840761736614	91.4616939384137	88.1220322469038	76.9006497273396
95.0051919128561	94.9740101191661	94.8591782900165	94.6495788744209	94.3176118643857	93.8016337361884	92.9599958075857	91.4325961960657	88.0812259453191	76.8175728196391
94.9865659835022	94.9553716671102	94.8403208203414	94.6302613342957	94.2974902404622	93.7801210002916	92.9359555417663	91.4035461162472	88.04048203391	76.7345919053356
94.9679625242289	94.9367565562368	94.8214885369077	94.6109716387519	94.2773997602068	93.7586433152276	92.911955269228	91.3745435572818	87.9998003206777	76.6517066747078
94.949381547304	94.9181647933125	94.8026814349352	94.5917097647407	94.2573403761629	93.7372006050483	92.8879948833842	91.3455883781799	87.9591806146661	76.5689168198073
94.9308230647235	94.8995963848139	94.7838995093458	94.5724756889634	94.2373120407626	93.7157927939187	92.8640742780362	91.3166804386337	87.9186227259538	76.4862220344429
94.9122870882108	94.8810513369284	94.7651427547658	94.5532693878758	94.2173147063297	93.6944198061185	92.8401933473723	91.2878195990124	87.8781264656449	76.403622014165
94.8937736292163	94.8625296555544	94.7464111655283	94.5340908376909	94.1973483250841	93.6730815660447	92.8163519859661	91.2590057203577	87.8376916458603	76.3211164562496
94.875282698917	94.8440313463019	94.7277047356749	94.5149400143828	94.1774128491444	93.6517779982126	92.7925500887756	91.2302386643789	87.7973180797295	76.2387050596834
94.8568143082161	94.8255564144935	94.7090234589583	94.49581689369	94.157508230532	93.6305090272582	92.7687875511423	91.2015182934488	87.757005581382	76.1563875251482
94.8383684677426	94.8071048651645	94.6903673288441	94.4767214511187	94.1376344211744	93.6092745779396	92.7450642687896	91.1728444705983	87.7167539659392	76.0741635550064
94.8199451878511	94.788676703064	94.671736338513	94.4576536619465	94.1177913729083	93.5880745751389	92.7213801378222	91.1442170595127	87.676563049506	75.992032853286
94.8015444786217	94.7702719326553	94.6531304808635	94.4386135012251	94.0979790374828	93.5669089438638	92.6977350547239	91.1156359245268	87.6364326491627	75.9099951256658
94.7831663498594	94.7518905581171	94.6345497485131	94.4196009437843	94.0781973665632	93.5457776092489	92.6741289163576	91.0871009306204	87.5963625829573	75.8280500794616
94.7648108110944	94.7335325833435	94.6159941338013	94.4006159642345	94.0584463117334	93.5246804965577	92.6505616199632	91.0586119434142	87.5563526698972	75.7461974236116
94.7464778715819	94.7151980119455	94.5974636287914	94.3816585369707	94.0387258244995	93.5036175311836	92.6270330631565	91.0301688291652	87.5164027299419	75.6644368686625
94.7281675403015	94.6968868472515	94.5789582252726	94.3627286361748	94.0190358562925	93.4825886386515	92.6035431439282	91.0017714547624	87.4765125839945	75.5827681267555
94.7098798259582	94.6785990923083	94.5604779147624	94.3438262358196	93.9993763584717	93.4615937446195	92.5800917606426	90.9734196877224	87.4366820538949	75.501190911613
94.6916147369814	94.6603347498817	94.5420226885085	94.3249513096713	93.9797472823272	93.4406327748796	92.5566788120361	90.9451133961856	87.396910962412	75.4197049385249
94.6733722815256	94.6420938224578	94.5235925374912	94.3061038312927	93.960148579083	93.4197056553596	92.5333041972161	90.9168524489114	87.3571991332358	75.3383099243352
94.6551524674704	94.6238763122434	94.5051874524251	94.2872837740464	93.9405801998996	93.3988123121239	92.5099678156596	90.8886367152744	87.3175463909707	75.257005587429
94.6369553024203	94.6056822211676	94.4868074237621	94.2684911110976	93.9210420958772	93.377952671375	92.4866695672118	90.8604660652602	87.2779525611278	75.1757916477195
94.6187807937054	94.5875115508822	94.4684524416925	94.2497258154172	93.901534218058	93.3571266594545	92.4634093520853	90.8323403694611	87.2384174701179	75.0946678266352
94.6006289483812	94.5693643027629	94.450122496148	94.2309878597847	93.8820565174289	93.3363342028441	92.4401870708582	90.8042594990725	87.1989409452443	75.0136338471073
94.582499773229	94.5512404779106	94.4318175768032	94.2122772167911	93.8626089449243	93.3155752281673	92.417002624473	90.7762233258881	87.1595228146959	74.9326894335566
94.5643932747564	94.5331400771519	94.4135376730783	94.1935938588416	93.8431914514288	93.2948496621895	92.3938559142351	90.7482317222967	87.1201629075401	74.8518343118823
94.5463094591971	94.5150631010407	94.3952827741408	94.1749377581586	93.8238039877792	93.2741574318196	92.370746841812	90.7202845612778	87.0808610537159	74.7710682094487
94.5282483325118	94.4970095498588	94.3770528689077	94.1563088867846	93.8044465047675	93.2534984641112	92.3476753092313	90.6923817163978	87.0416170840274	74.6903908550736
94.5102099003885	94.4789794236175	94.3588479460478	94.1377072165848	93.785118953143	93.2328726862628	92.3246412188796	90.6645230618058	87.0024308301366	74.6098019790166
94.4921941682424	94.4609727220581	94.3406679939837	94.1191327192498	93.7658212836148	93.2122800256192	92.3016444735015	90.6367084722304	86.9633021245572	74.5293013129667
94.4742011412172	94.4429894446538	94.3225130008939	94.1005853662984	93.7465534468543	93.1917204096723	92.2786849761974	90.6089378229753	86.924230800648	74.4488885900315
94.4562308241849	94.4250295906101	94.3043829547149	94.0820651290803	93.7273153934971	93.1711937660619	92.2557626304232	90.5812109899156	86.885216692606	74.3685635447249
94.4382832217468	94.4070931588666	94.2862778431433	94.0635719787787	93.7081070741458	93.1507000225765	92.2328773399881	90.5535278494943	86.8462596354605	74.2883259129564
94.4203583382335	94.3891801480978	94.2681976536378	94.0451058864128	93.6889284393716	93.130239107154	92.2100290090534	90.5258882787183	86.8073594650664	74.2081754320192
94.4024561777061	94.3712905567145	94.2501423734216	94.0266668228406	93.6697794397169	93.1098109478824	92.1872175421316	90.4982921551549	86.7685160180979	74.12811184058
94.3845767439565	94.3534243828647	94.2321119894839	94.0082547587613	93.6506600256974	93.0894154730008	92.1644428440844	90.4707393569277	86.7297291320426	74.048134878667
94.366720040508	94.3355816244356	94.2141064885826	93.9898696647179	93.6315701478041	93.0690526108998	92.1417048201218	90.4432297627139	86.6909986451951	73.9682442876601
94.3488860706161	94.317762279054	94.1961258572461	93.9715115110995	93.6125097565052	93.0487222901222	92.1190033758003	90.4157632517395	86.6523243966509	73.8884398102793
94.3310748372691	94.2999663440878	94.178170081775	93.9531802681441	93.5934788022484	93.0284244393635	92.0963384170219	90.3883397037767	86.6137062263005	73.8087211905747
94.3132863431889	94.2821938166479	94.1602391482448	93.9348759059408	93.5744772354628	93.0081589874729	92.0737098500324	90.3609589991398	86.5751439748234	73.7290881739158
94.2955205908317	94.2644446935885	94.1423330425075	93.9165983944324	93.5555050065606	92.9879258634533	92.0511175814205	90.3336210186821	86.5366374836823	73.6495405069811
94.2777775823887	94.2467189715092	94.1244517501936	93.8983477034172	93.5365620659394	92.9677249964626	92.0285615181157	90.3063256437919	86.498186595117	73.5700779377482
94.2600573197872	94.229016646756	94.1065952567145	93.8801238025524	93.5176483639839	92.9475563158132	92.0060415673875	90.2790727563895	86.459791152139	73.4907002154831
94.2423598046908	94.2113377154226	94.088763547264	93.8619266613553	93.4987638510674	92.9274197509734	91.9835576368439	90.2518622389236	86.4214509985255	73.4114070907308
94.2246850385011	94.1936821733519	94.0709566068208	93.8437562492064	93.4799084775542	92.9073152315675	91.9611096344296	90.224693974368	86.3831659788141	73.3321983153051
94.207033022358	94.1760500161371	94.0531744201501	93.8256125353513	93.4610821938011	92.8872426873762	91.9386974684253	90.197567846218	86.3449359382967	73.2530736422788
94.1894037571404	94.1584412391235	94.035416971806	93.807495488903	93.4422849501589	92.8672020483369	91.9163210474458	90.1704837384873	86.3067607230145	73.1740328259742
94.1717972434677	94.1408558374094	94.0176842461328	93.7894050788443	93.4235166969744	92.8471932445447	91.8939802804389	90.1434415357046	86.2686401797521	73.0950756219535
94.1542134817004	94.1232938058477	93.9999762272679	93.7713412740295	93.404777384592	92.827216206252	91.8716750766835	90.1164411229103	86.2305741560325	73.016201787009
94.1366524719412	94.1057551390474	93.9822928991428	93.7533040431873	93.3860669633553	92.8072708638692	91.8494053457892	90.0894823856534	86.1925625001114	72.9374110791544
94.1191142140356	94.0882398313749	93.964634245486	93.7352933549223	93.3673853836089	92.7873571479654	91.8271709976938	90.0625652099879	86.1546050609719	72.8587032576151
94.1015987075734	94.0707478769553	93.9470002498239	93.7173091777173	93.3487325956994	92.767474989268	91.8049719426627	90.0356894824701	86.1167016883197	72.7800780828188
94.0841059518894	94.0532792696739	93.9293908954838	93.6993514799357	93.3301085499778	92.7476243186635	91.7828080912872	90.008855090155	86.0788522325773	72.7015353163873
94.0666359460644	94.0358340031778	93.9118061655949	93.6814202298231	93.3115131968003	92.7278050671976	91.7606793544832	89.9820619205934	86.0410565448792	72.6230747211265
94.0491886889266	94.0184120708771	93.8942460430909	93.6635153955096	93.2929464865302	92.7080171660755	91.7385856434898	89.9553098618285	86.0033144770669	72.5446960610186
94.0317641790522	94.0010134659464	93.8767105107115	93.6456369450117	93.2744083695391	92.6882605466622	91.7165268698678	89.9285988023934	85.9656258816836	72.4663991012123
94.0143624147667	93.9836381813264	93.8591995510044	93.6277848462346	93.2558987962086	92.6685351404825	91.6945029454987	89.9019286313073	85.9279906119692	72.3881836080149
93.9969833941462	93.966286209725	93.8417131463272	93.6099590669736	93.2374177169314	92.6488408792215	91.672513782583	89.8752992380728	85.8904085218556	72.3100493488836
93.979627115018	93.9489575436192	93.8242512788495	93.5921595749166	93.2189650821131	92.6291776947246	91.6505592936386	89.8487105126729	85.8528794659617	72.2319960924164
93.9622935749623	93.9316521752561	93.8068139305541	93.5743863376458	93.2005408421731	92.6095455189976	91.6286393915003	89.8221623455682	85.8154032995886	72.1540236083446
93.9449827713128	93.914370096655	93.7894010832397	93.5566393226395	93.1821449475462	92.5899442842071	91.6067539893174	89.7956546276934	85.7779798787146	72.0761316675238
93.9276947011584	93.8971112996081	93.7720127185221	93.538918497274	93.1637773486838	92.5703739226804	91.5849030005531	89.7691872504546	85.7406090599907	71.998320041926
93.9104293613439	93.8798757756825	93.7546488178364	93.5212238288259	93.1454379960554	92.5508343669058	91.5630863389827	89.7427601057267	85.7032907007358	71.9205885046316
93.8931867484715	93.8626635162217	93.7373093624387	93.5035552844731	93.1271268401494	92.5313255495327	91.5413039186926	89.71637308585	85.666024658932	71.8429368298207
93.8759668589017	93.8454745123467	93.7199943334078	93.4859128312974	93.1088438314749	92.5118474033714	91.5195556540786	89.6900260836276	85.6288107932202	71.7653647927658
93.858769688755	93.8283087549579	93.7027037116472	93.4682964362859	93.0905889205623	92.4923998613936	91.4978414598447	89.6637189923226	85.591648962895	71.6878721698238
93.8415952339124	93.8111662347363	93.6854374778867	93.4507060663327	93.0723620579651	92.4729828567322	91.4761612510019	89.6374517056549	85.554539027901	71.6104587384278
93.8244434900173	93.7940469421451	93.6681956126845	93.4331416882411	93.0541631942605	92.4535963226814	91.4545149428665	89.611224117799	85.5174808488277	71.5331242770798
93.8073144524763	93.7769508674314	93.6509780964286	93.4156032687247	93.0359922800511	92.4342401926969	91.4329024510592	89.5850361233805	85.4804742869051	71.4558685653429
93.7902081164609	93.7598780006273	93.6337849093388	93.3980907744097	93.0178492659654	92.4149144003957	91.4113236915034	89.5588876174739	85.4435192039997	71.3786913838335
93.7731244769081	93.7428283315517	93.6166160314682	93.380604171836	92.9997341026595	92.3956188795561	91.3897785804241	89.5327784955997	85.4066154626097	71.3015925142142
93.7560635285224	93.7258018498116	93.5994714427055	93.3631434274595	92.9816467408177	92.376353564118	91.3682670343465	89.5067086537215	85.3697629258609	71.2245717391861
93.7390252657766	93.7087985448038	93.5823511227759	93.3457085076534	92.9635871311538	92.3571183881825	91.3467889700944	89.4806779882436	85.3329614575026	71.1476288424816
93.7220096829131	93.6918184057164	93.5652550512437	93.3282993787096	92.9455552244121	92.3379132860122	91.3253443047896	89.4546863960079	85.296210921903	71.0707636088569
93.7050167739457	93.6748614215302	93.5481832075133	93.3109160068408	92.9275509713684	92.3187381920311	91.3039329558496	89.4287337742918	85.2595111840453	70.9939758240852
93.68804653266	93.65792758102	93.5311355708312	93.2935583581819	92.909574322831	92.2995930408242	91.2825548409872	89.4028200208051	85.2228621095234	70.917265274949
93.6710989526158	93.6410168727568	93.5141121202879	93.2762263987914	92.8916252296417	92.2804777671382	91.2612098782087	89.3769450336877	85.1862635645379	70.8406317492337
93.6541740271475	93.6241292851083	93.4971128348192	93.2589200946531	92.8737036426765	92.2613923058806	91.2398979858126	89.3511087115067	85.149715415892	70.7640750357201
93.6372717493659	93.6072648062414	93.4801376932079	93.2416394116777	92.8558095128472	92.2423365921201	91.2186190823884	89.3253109532541	85.1132175309873	70.6875949241775
93.6203921121596	93.5904234241231	93.4631866740858	93.2243843157043	92.8379427911014	92.2233105610865	91.1973730868154	89.2995516583441	85.07676977782	70.6111912053572
93.6035351081961	93.5736051265222	93.4462597559352	93.2071547725018	92.8201034284242	92.2043141481705	91.1761599182613	89.2738307266107	85.040372024977	70.5348636709855
93.586700729923	93.5568099010107	93.4293569170901	93.1899507477702	92.8022913758387	92.1853472889234	91.1549794961808	89.2481480583049	85.0040241416317	70.4586121137568
93.5698889695699	93.5400377349655	93.4124781357386	93.1727722071426	92.7845065844068	92.1664099190576	91.1338317403145	89.2225035540927	84.9677259975404	70.3824363273273
93.5530998191495	93.5232886155699	93.3956233899239	93.1556191161862	92.7667490052305	92.1475019744459	91.1127165706876	89.1968971150519	84.931477463038	70.3063361063079
93.5363332704584	93.5065625298147	93.3787926575462	93.1384914404039	92.7490185894519	92.1286233911213	91.0916339076086	89.1713286426706	84.8952784090349	70.2303112462583
93.5195893150797	93.4898594645002	93.3619859163642	93.1213891452357	92.7313152882552	92.1097741052775	91.0705836716679	89.1457980388439	84.8591287070126	70.1543615436802
93.5028679443832	93.4731794062374	93.3452031439967	93.10431219606	92.7136390528662	92.0909540532681	91.0495657837367	89.1203052058717	84.8230282290201	70.0784867960105
93.4861691495272	93.4565223414499	93.3284443179242	93.0872605581951	92.6959898345542	92.072163171607	91.0285801649657	89.0948500464569	84.7869768476704	70.0026868016158
93.4694929214603	93.4398882563746	93.3117094154905	93.0702341969006	92.678367584632	92.0534013969675	91.0076267367838	89.069432463702	84.7509744361365	69.9269613597855
93.4528392509222	93.4232771370641	93.294998413904	93.0532330773785	92.660772254457	92.0346686661831	90.986705420897	89.0440523611078	84.7150208681481	69.8513102707256
93.4362081284451	93.4066889693876	93.2783112902397	93.0362571647749	92.643203795432	92.0159649162464	90.9658161392868	89.01870964257	84.6791160179876	69.7757333355528
93.4195995443557	93.3901237390328	93.2616480214405	93.019306424181	92.6256621590056	91.9972900843094	90.9449588142096	88.9934042123779	84.6432597604868	69.7002303562881
93.4030134887759	93.3735814315068	93.2450085843184	93.0023808206344	92.6081472966734	91.9786441076834	90.9241333681945	88.9681359752113	84.6074519710233	69.6248011358512
93.3864499516246	93.3570620321382	93.2283929555567	92.9854803191209	92.5906591599781	91.9600269238385	90.9033397240431	88.9429048361386	84.5716925255167	69.5494454780537
93.3699089226191	93.3405655260783	93.2118011117108	92.9686048845749	92.5731977005108	91.9414384704035	90.8825778048276	88.9177107006145	84.5359813004257	69.474163187594
93.3533903912762	93.3240918983027	93.1952330292102	92.9517544818815	92.555762869911	91.9228786851657	90.8618475338898	88.8925534744775	84.5003181727439	69.3989540700509
93.3368943469138	93.3076411336124	93.1786886843599	92.9349290758772	92.5383546198679	91.9043475060707	90.8411488348398	88.8674330639482	84.4647030199971	69.323817931878
93.3204207786526	93.291213216636	93.1621680533416	92.9181286313513	92.5209729021207	91.8858448712222	90.820481631555	88.8423493756263	84.4291357202393	69.2487545803976
93.3039696754169	93.2748081318303	93.1456711122153	92.9013531130472	92.5036176684592	91.8673707188818	90.7998458481786	88.8173023164892	84.3936161520497	69.1737638237954
93.2875410259364	93.2584258634824	93.129197836921	92.8846024856633	92.4862888707246	91.8489249874685	90.7792414091187	88.7922917938891	84.3581441945292	69.0988454711145
93.2711348187478	93.2420663957111	93.1127482032798	92.8678767138548	92.4689864608098	91.8305076155589	90.7586682390467	88.7673177155514	84.322719727297	69.02399933225
93.2547510421956	93.2257297124679	93.0963221869956	92.851175762234	92.4517103906605	91.8121185418866	90.7381262628965	88.7423799895722	84.2873426304876	68.9492252179431
93.238389684434	93.209415797539	93.0799197636562	92.8344995953723	92.4344606122751	91.793757705342	90.7176154058633	88.7174785244163	84.2520127847473	68.8745229397759
93.2220507334283	93.1931246345465	93.063540908735	92.8178481778007	92.4172370777059	91.7754250449722	90.6971355934019	88.692613228915	84.2167300712312	68.7998923101659
93.205734176956	93.1768562069498	93.0471855975924	92.8012214740114	92.4000397390593	91.7571204999806	90.6766867512264	88.667784012264	84.1814943715996	68.7253331423602
93.1894400026084	93.1606104980472	93.0308538054771	92.7846194484585	92.3828685484964	91.7388440097266	90.6562688053081	88.6429907840216	84.1463055680152	68.6508452504307
93.1731681977922	93.1443874909771	93.0145455075273	92.7680420655595	92.3657234582337	91.7205955137257	90.6358816818749	88.618233454106	84.1111635431399	68.5764284492681
93.1569187497305	93.1281871687197	92.9982606787724	92.751489289696	92.3486044205432	91.7023749516487	90.6155253074103	88.5935119327938	84.0760681801316	68.5020825545774
93.1406916454646	93.1120095140984	92.9819992941343	92.7349610852153	92.3315113877534	91.6841822633216	90.5951996086514	88.5688261307177	84.041019362641	68.4278073828717
93.1244868718551	93.0958545097808	92.9657613284286	92.7184574164308	92.3144443122495	91.6660173887254	90.5749045125887	88.5441759588646	84.0060169748086	68.353602751468
93.1083044155836	93.0797221382809	92.9495467563659	92.7019782476236	92.2974031464741	91.647880267996	90.5546399464645	88.5195613285735	83.971060901262	68.2794684784815
93.0921442631539	93.0636123819598	92.9333555525536	92.6855235430433	92.2803878429273	91.6297708414235	90.5344058377718	88.4949821515334	83.9361510271124	68.2054043828202
93.0760064008933	93.0475252230273	92.9171876914965	92.669093266909	92.2633983541676	91.6116890494521	90.5142021142529	88.4704383397816	83.9012872379516	68.1314102841808
93.0598908149543	93.0314606435436	92.9010431475987	92.6526873834106	92.2464346328123	91.5936348326798	90.494028703899	88.4459298057013	83.8664694198497	68.0574860030427
93.043797491316	93.0154186254203	92.8849218951649	92.6363058567093	92.2294966315374	91.5756081318581	90.4738855349482	88.4214564620203	83.8316974593513	67.9836313606636
93.0277264157852	92.9993991504221	92.868823908401	92.619948650939	92.2125843030788	91.5576088878918	90.4537725358851	88.3970182218081	83.7969712434731	67.9098461790744
93.0116775739979	92.983402200168	92.8527491614165	92.6036157302073	92.1956976002324	91.5396370418384	90.4336896354392	88.3726149984751	83.7622906597009	67.8361302810743
92.995650951421	92.9674277561328	92.8366976282247	92.5873070585962	92.1788364758542	91.5216925349081	90.4136367625841	88.3482467057697	83.7276555959867	67.762483490226
92.9796465333531	92.9514757996483	92.8206692827446	92.571022600163	92.1620008828613	91.5037753084633	90.3936138465362	88.323913257777	83.6930659407458	67.6889056308509
92.9636643049266	92.9355463119048	92.804664098802	92.5547623189419	92.145190774232	91.4858853040182	90.3736208167535	88.2996145689166	83.6585215828541	67.6153965280243
92.9477042511085	92.9196392739528	92.7886820501309	92.538526178944	92.1284061030059	91.4680224632388	90.353657602935	88.275350553941	83.6240224116454	67.5419560075707
92.9317663567022	92.9037546667035	92.7727231103743	92.522314144159	92.111646822285	91.4501867279423	90.3337241350191	88.2511211279335	83.5895683169081	67.468583896059
92.9158506063485	92.887892470931	92.756787253086	92.5061261785558	92.0949128852334	91.4323780400969	90.3138203431827	88.2269262063064	83.555159188883	67.3952800207983
92.8999569845274	92.8720526672733	92.7408744517313	92.4899622460832	92.0782042450779	91.4145963418213	90.29394615784	88.2027657047993	83.5207949182606	67.3220442098326
92.8840854755591	92.8562352362336	92.7249846796886	92.4738223106712	92.0615208551086	91.3968415753846	90.2741015096418	88.1786395394771	83.4864753961777	67.2488762919369
92.8682360636055	92.8404401581817	92.7091179102506	92.4577063362317	92.0448626686788	91.3791136832058	90.2542863294739	88.1545476267284	83.4522005142155	67.1757760966121
92.8524087326717	92.8246674133554	92.6932741166249	92.4416142866593	92.0282296392056	91.3614126078536	90.2345005484566	88.1304898832635	83.4179701643967	67.1027434540811
92.8366034666073	92.8089169818618	92.6774532719362	92.4255461258321	92.0116217201705	91.3437382920459	90.2147440979431	88.1064662261127	83.3837842391823	67.0297781952838
92.8208202491077	92.7931888436785	92.6616553492265	92.409501817613	91.995038865119	91.3260906786495	90.1950169095188	88.0824765726247	83.34964263147	66.9568801518731
92.8050590637153	92.777482978655	92.6458803214569	92.3934813258499	91.9784810276617	91.3084697106799	90.175318915	88.0585208404644	83.3155452345907	66.8840491562103
92.7893198938213	92.761799366514	92.6301281615084	92.3774846143771	91.961948161474	91.2908753313008	90.1556500464334	88.0345989476116	83.2814919423062	66.8112850413607
92.7736027226668	92.7461379868529	92.6143988421834	92.3615116470157	91.9454402202967	91.2733074838237	90.1360102360942	88.0107108123592	83.247482648807	66.7385876410896
92.7579075333438	92.7304988191445	92.5986923362065	92.3455623875748	91.9289571579366	91.2557661117077	90.1163994164857	87.9868563533113	83.2135172487093	66.6659567898576
92.7422343087973	92.7148818427393	92.5830086162258	92.3296367998518	91.9124989282659	91.2382511585593	90.0968175203381	87.9630354893815	83.1795956370524	66.593392322817
92.726583031826	92.6992870368655	92.5673476548139	92.3137348476337	91.8960654852236	91.2207625681314	90.0772644806076	87.9392481397914	83.1457177092968	66.5208940758067
92.710953685084	92.6837143806315	92.5517094244693	92.2978564946977	91.8796567828146	91.2033002843239	90.0577402304751	87.9154942240687	83.1118833613212	66.4484618853489
92.6953462510816	92.6681638530263	92.5360938976172	92.2820017048118	91.8632727751111	91.1858642511824	90.0382447033454	87.8917736620459	83.07809248942	66.3760955886446
92.6797607121876	92.6526354329213	92.5205010466108	92.2661704417358	91.846913416252	91.1684544128985	90.0187778328461	87.8680863738581	83.0443449903013	66.3037950235692
92.6641970506296	92.6371290990712	92.5049308437321	92.2503626692221	91.8305786604437	91.1510707138091	89.9993395528266	87.8444322799418	83.0106407610841	66.2315600286691
92.648655248496	92.6216448301155	92.4893832611934	92.2345783510161	91.81426846196	91.1337130983962	89.9799297973572	87.8208113010329	82.976979699296	66.159390443157
92.6331352877368	92.6061826045795	92.4738582711382	92.2188174508573	91.7979827751426	91.1163815112865	89.960548500728	87.7972233581654	82.9433617028708	66.0872861069084
92.6176371501654	92.5907424008759	92.458355845642	92.2030799324799	91.781721554401	91.099075897251	89.941195597448	87.7736683726698	82.9097866701463	66.0152468604574
92.6021608174595	92.5753241973056	92.4428759567137	92.1873657596135	91.7654847542132	91.0817962012047	89.921871022244	87.7501462661711	82.8762544998616	65.9432725449929
92.5867062711629	92.5599279720593	92.4274185762966	92.1716748959838	91.7492723291255	91.064542368206	89.9025747100597	87.7266569605877	82.842765091155	65.8713630023543
92.5712734926859	92.5445537032185	92.4119836762694	92.1560073053134	91.7330842337531	91.0473143434568	89.8833065960547	87.7032003781293	82.8093183435619	65.7995180750282
92.5558624633077	92.5292013687568	92.396571228447	92.1403629513224	91.7169204227798	91.0301120723017	89.8640666156035	87.6797764412959	82.7759141570118	65.7277376061442
92.5404731641768	92.513870946541	92.3811812045819	92.1247417977292	91.7007808509587	91.0129355002278	89.8448547042948	87.6563850728758	82.742552431827	65.6560214394711
92.5251055763127	92.4985624143325	92.3658135763649	92.1091438082511	91.6846654731122	90.9957845728643	89.8256707979301	87.6330261959443	82.7092330687193	65.5843694194132
92.509759680607	92.4832757497883	92.3504683154265	92.0935689466049	91.6685742441322	90.9786592359822	89.8065148325228	87.6096997338621	82.6759559687888	65.5127813910066
92.494435457825	92.4680109304622	92.3351453933374	92.0780171765077	91.6525071189803	90.9615594354938	89.7873867442979	87.5864056102737	82.6427210335207	65.4412571999153
92.4791328886063	92.4527679338062	92.3198447816099	92.0624884616777	91.6364640526879	90.9444851174524	89.76828646969	87.5631437491058	82.6095281647838	65.3697966924277
92.4638519534669	92.4375467371713	92.3045664516985	92.0469827658344	91.6204450003565	90.9274362280521	89.7492139453434	87.5399140745662	82.5763772648279	65.2983997154527
92.4485926327995	92.4223473178092	92.2893103750015	92.0315000526996	91.6044499171581	90.9104127136271	89.7301691081105	87.5167165111419	82.5432682362818	65.2270661165164
92.4333549068758	92.4071696528727	92.2740765228612	92.016040285998	91.5884787583347	90.8934145206514	89.7111518950509	87.4935509835977	82.5102009821512	65.1557957437581
92.4181387558468	92.3920137194176	92.2588648665654	92.0006034294578	91.572531479199	90.8764415957387	89.6921622434309	87.470417416975	82.4771754058163	65.084588445927
92.4029441597445	92.3768794944035	92.2436753773482	91.9851894468111	91.5566080351347	90.8594938856417	89.6732000907222	87.4473157365898	82.4441914110298	65.0134440723786
92.3877710984831	92.361766954695	92.2285080263909	91.969798301795	91.5407083815959	90.8425713372519	89.6542653746011	87.4242458680319	82.4112489019152	64.9423624730711
92.3726195518603	92.3466760770626	92.2133627848229	91.9544299581517	91.5248324741083	90.8256738975991	89.6353580329475	87.4012077371629	82.3783477829637	64.8713434985618
92.3574894995581	92.3316068381842	92.1982396237227	91.9390843796294	91.5089802682684	90.8088015138513	89.6164780038441	87.378201270115	82.3454879590334	64.800387000004
92.3423809211445	92.3165592146461	92.183138514119	91.9237615299827	91.4931517197441	90.791954133314	89.5976252255756	87.3552263932897	82.312669335346	64.7294928291431
92.3272937960745	92.301533182944	92.1680594269913	91.9084613729736	91.4773467842749	90.7751317034297	89.5787996366277	87.332283033356	82.2798918174856	64.6586608383135
92.3122281036912	92.2865287194842	92.1530023332709	91.8931838723713	91.4615654176716	90.7583341717783	89.5600011756859	87.3093711172496	82.2471553113965	64.5878908804351
92.2971838232271	92.2715458005846	92.1379672038419	91.8779289919537	91.4458075758172	90.7415614860757	89.5412297816351	87.2864905721709	82.2144597233807	64.5171828090098
92.2821609338055	92.2565844024761	92.1229540095421	91.8626966955072	91.4300732146661	90.7248135941743	89.5224853935584	87.2636413255838	82.1818049600967	64.4465364781186
92.267159414441	92.241644501303	92.1079627211637	91.8474869468278	91.4143622902449	90.7080904440618	89.5037679507366	87.2408233052146	82.1491909285567	64.3759517424175
92.2521792440417	92.226726073125	92.0929933094544	91.8322997097213	91.3986747586523	90.6913919838617	89.4850773926467	87.2180364390503	82.1166175361251	64.3054284571352
92.2372204014093	92.2118290939176	92.0780457451182	91.8171349480038	91.383010576059	90.6747181618323	89.4664136589616	87.1952806553373	82.0840846905166	64.2349664780689
92.2222828652412	92.1969535395734	92.063119998816	91.8019926255028	91.3673696987084	90.6580689263664	89.4477766895488	87.1725558825803	82.0515922997939	64.1645656615816
92.2073666141308	92.1820993859031	92.048216041167	91.7868727060571	91.3517520829158	90.6414442259911	89.4291664244701	87.1498620495406	82.019140272366	64.0942258645989
92.1924716265695	92.1672666086367	92.033333842749	91.7717751535174	91.3361576850695	90.6248440093674	89.4105828039801	87.127199085235	81.9867285169862	64.0239469446055
92.177597880947	92.1524551834242	92.0184733740997	91.7566999317474	91.3205864616301	90.6082682252897	89.3920257685258	87.1045669189343	81.9543569427503	63.9537287596422
92.1627453555532	92.1376650858373	92.0036346057171	91.7416470046236	91.3050383691309	90.5917168226856	89.3734952587455	87.0819654801624	81.9220254590946	63.8835711683028
92.1479140285788	92.1228962913694	91.9888175080607	91.7266163360361	91.2895133641782	90.5751897506152	89.354991215468	87.0593946986944	81.889733975794	63.8134740297308
92.1331038781167	92.1081487754379	91.9740220515523	91.7116078898893	91.2740114034511	90.5586869582711	89.336513579712	87.0368545045557	81.8574824029603	63.7434372036165
92.118314882163	92.0934225133839	91.9592482065763	91.6966216301021	91.2585324437016	90.5422083949778	89.318062292685	87.0143448280206	81.8252706510401	63.6734605501939
92.1035470186181	92.0787174804745	91.9444959434813	91.6816575206085	91.2430764417547	90.5257540101915	89.2996372957825	86.9918655996112	81.7930986308133	63.6035439302375
92.088800265288	92.0640336519026	91.9297652325801	91.666715525358	91.2276433545086	90.5093237534993	89.2812385305872	86.9694167500956	81.760966253391	63.5336872050594
92.0740745998851	92.049371002789	91.9150560441514	91.6517956083163	91.2122331389347	90.4929175746195	89.2628659388683	86.9469982104874	81.7288734302136	63.4638902365061
92.0593700000295	92.0347295081824	91.9003683484396	91.6368977334657	91.1968457520776	90.4765354234005	89.2445194625805	86.9246099120439	81.6968200730494	63.3941528869558
92.0446864432502	92.0201091430611	91.8857021156563	91.6220218648051	91.1814811510553	90.4601772498211	89.2261990438633	86.9022517862648	81.6648060939925	63.3244750193154
92.0300239069858	92.0055098823338	91.8710573159808	91.6071679663514	91.1661392930591	90.4438430039895	89.2079046250402	86.8799237648915	81.6328314054611	63.2548564970171
92.015382368586	91.9909317008404	91.856433919561	91.592336002139	91.1508201353538	90.4275326361434	89.1896361486178	86.8576257799053	81.6008959201957	63.1852971840161
92.0007618053123	91.9763745733529	91.8418318965139	91.5775259362209	91.1355236352777	90.4112460966494	89.171393557285	86.8353577635266	81.5689995512576	63.1157969447874
91.9861621943392	91.961838474577	91.8272512169266	91.5627377326688	91.1202497502425	90.3949833360026	89.1531767939123	86.8131196482133	81.5371422120268	63.0463556443227
91.9715835127557	91.9473233791521	91.812691850857	91.5479713555738	91.1049984377338	90.3787443048265	89.134985801551	86.7909113666599	81.5053238162004	62.9769731481281
91.9570257375655	91.9328292616531	91.7981537683346	91.5332267690464	91.0897696553105	90.3625289538722	89.1168205234324	86.7687328517963	81.473544277791	62.9076493222207
91.9424888456887	91.9183560965908	91.7836369393608	91.5185039372177	91.0745633606056	90.3463372340183	89.0986809029669	86.7465840367863	81.4418035111252	62.8383840331261
91.9279728139625	91.9039038584131	91.7691413339105	91.5038028242388	91.0593795113255	90.3301690962705	89.0805668837433	86.7244648550268	81.4101014308412	62.7691771478757
91.9134776191426	91.8894725215057	91.754666921932	91.4891233942821	91.0442180652505	90.3140244917613	89.0624784095282	86.7023752401464	81.3784379518878	62.7000285340034
91.8990032379038	91.8750620601935	91.740213673348	91.4744656115413	91.0290789802348	90.2979033717493	89.0444154242649	86.6803151260043	81.3468129895225	62.6309380595433
91.8845496468414	91.8606724487408	91.7257815580564	91.4598294402319	91.0139622142063	90.2818056876194	89.0263778720729	86.6582844466891	81.3152264593099	62.5619055930272
91.8701168224716	91.8463036613528	91.711370545931	91.4452148445916	90.9988677251668	90.2657313908816	89.0083656972469	86.6362831365177	81.28367827712	62.4929310034809
91.8557047412336	91.8319556721764	91.6969806068222	91.4306217888806	90.9837954711921	90.2496804331717	88.9903788442563	86.6143111300341	81.2521683591266	62.4240141604227
91.8413133794894	91.8176284553007	91.6826117105575	91.4160502373823	90.9687454104319	90.2336527662498	88.9724172577442	86.5923683620084	81.2206966218055	62.3551549338598
91.8269427135255	91.8033219847585	91.6682638269423	91.4015001544031	90.9537175011097	90.2176483420009	88.954480882527	86.5704547674355	81.1892629819333	62.2863531942862
91.8125927195538	91.7890362345266	91.6539369257607	91.3869715042736	90.9387117015233	90.2016671124339	88.936569663593	86.548570281534	81.1578673565855	62.2176088126796
91.7982633737126	91.7747711785273	91.6396309767761	91.3724642513483	90.9237279700443	90.1857090296815	88.9186835461026	86.5267148397452	81.1265096631349	62.1489216604993
91.7839546520671	91.7605267906286	91.6253459497319	91.3579783600063	90.9087662651182	90.1697740459997	88.9008224753866	86.504888377732	81.0951898192503	62.080291609683
91.7696665306111	91.7463030446455	91.6110818143519	91.3435137946513	90.8938265452647	90.1538621137675	88.8829863969461	86.4830908313776	81.0639077428945	62.0117185326449
91.7553989852676	91.7320999143408	91.5968385403414	91.3290705197128	90.8789087690775	90.1379731854868	88.8651752564516	86.4613221367845	81.0326633523232	61.9432023022724
91.7411519918897	91.7179173734258	91.5826160973875	91.3146484996455	90.8640128952243	90.1221072137815	88.847388999742	86.4395822302737	81.0014565660832	61.8747427919242
91.7269255262615	91.7037553955615	91.56841445516	91.3002476989302	90.849138882447	90.1062641513974	88.8296275728244	86.417871048383	80.970287303011	61.8063398754273
91.7127195640995	91.6896139543588	91.5542335833117	91.285868082074	90.8342866895613	90.0904439512021	88.811890921873	86.3961885278666	80.939155482231	61.7379934270746
91.698534081053	91.67549302338	91.5400734514795	91.2715096136108	90.8194562754572	90.0746465661842	88.7941789932284	86.3745346056936	80.9080610231544	61.6697033216227
91.6843690527052	91.6613925761395	91.5259340292847	91.2571722581013	90.8046475990987	90.0588719494531	88.776491733397	86.3529092190471	80.8770038454776	61.601469434289
91.6702244545744	91.6473125861041	91.5118152863336	91.2428559801338	90.7898606195237	90.0431200542388	88.7588290890502	86.3313123053232	80.8459838691802	61.5332916407495
91.6561002621146	91.6332530266944	91.4977171922183	91.2285607443242	90.7750952958445	90.0273908338913	88.7411910070239	86.3097438021296	80.8150010145243	61.4651698171361
91.6419964507164	91.6192138712855	91.4836397165173	91.2142865153163	90.7603515872471	90.0116842418804	88.7235774343176	86.2882036472852	80.7840552020526	61.3971038400346
91.6279129957083	91.6051950932075	91.469582828796	91.2000332577826	90.7456294529917	89.9960002317952	88.7059883180937	86.2666917788185	80.7531463525868	61.329093586482
91.613849872357	91.5911966657468	91.4555464986074	91.1858009364239	90.7309288524126	89.9803387573439	88.6884236056768	86.2452081349667	80.7222743872267	61.2611389339638
91.5998070558689	91.5772185621464	91.4415306954924	91.1715895159702	90.7162497449181	89.9646997723533	88.6708832445533	86.223752654175	80.6914392273481	61.1932397604124
91.5857845213906	91.5632607556069	91.4275353889811	91.1573989611808	90.7015920899903	89.9490832307687	88.65336718237	86.2023252750952	80.6606407946019	61.1253959442041
91.5717822440099	91.5493232192874	91.4135605485924	91.1432292368447	90.6869558471856	89.933489086653	88.6358753669346	86.1809259365848	80.6298790109124	61.0576073641568
91.5578001987568	91.5354059263061	91.3996061438356	91.1290803077808	90.6723409761342	89.9179172941871	88.6184077462136	86.1595545777062	80.5991537984758	60.989873899528
91.5438383606041	91.521508849741	91.3856721442101	91.1149521388381	90.6577474365403	89.9023678076689	88.6009642683328	86.1382111377253	80.5684650797592	60.9221954300124
91.5298967044686	91.507631962631	91.3717585192066	91.1008446948963	90.6431751881822	89.8868405815132	88.583544881576	86.1168955561111	80.5378127774989	60.8545718357393
91.5159752052116	91.4937752379765	91.3578652383073	91.0867579408659	90.6286241909117	89.8713355702514	88.5661495343846	86.0956077725341	80.507196814699	60.7870029972705
91.5020738376402	91.4799386487397	91.3439922709866	91.0726918416885	90.614094404655	89.8558527285311	88.5487781753567	86.0743477268657	80.4766171146301	60.7194887955982
91.4881925765075	91.4661221678462	91.3301395867117	91.0586463623373	90.5995857894119	89.8403920111157	88.5314307532466	86.0531153591772	80.4460736008281	60.6520291121426
91.4743313965143	91.4523257681851	91.316307154943	91.0446214678169	90.585098305256	89.8249533728841	88.5141072169642	86.0319106097386	80.4155661970925	60.5846238287496
91.4604902723092	91.4385494226099	91.3024949451348	91.0306171231641	90.5706319123349	89.8095367688304	88.4968075155742	86.010733419018	80.3850948274854	60.5172728276886
91.4466691784897	91.4247931039393	91.2887029267358	91.016633293448	90.5561865708699	89.7941421540633	88.4795315982954	85.9895837276804	80.3546594163299	60.4499759916504
91.4328680896032	91.4110567849579	91.2749310691896	91.00266994377	90.5417622411559	89.7787694838062	88.4622794145004	85.9684614765868	80.324259888209	60.382733203745
91.4190869801474	91.3973404384168	91.261179341935	90.9887270392647	90.5273588835618	89.7634187133964	88.4450509137145	85.9473666067933	80.293896167964	60.3155443474993
91.4053258245717	91.3836440370347	91.2474477144073	90.9748045450994	90.5129764585301	89.7480897982851	88.4278460456153	85.9262990595502	80.2635681806934	60.248409306855
91.3915845972774	91.3699675534979	91.2337361560378	90.9609024264749	90.4986149265768	89.7327826940366	88.4106647600322	85.9052587763009	80.2332758517516	60.1813279661665
91.3778632726188	91.3563109604618	91.2200446362549	90.9470206486258	90.4842742482917	89.7174973563288	88.3935070069454	85.8842456986812	80.2030191067476	60.1143002101986
91.3641618249042	91.3426742305511	91.2063731244848	90.9331591768201	90.4699543843381	89.7022337409518	88.3763727364856	85.8632597685183	80.1727978715436	60.0473259241247
91.3504802283963	91.3290573363605	91.1927215901514	90.9193179763603	90.4556552954527	89.6869918038084	88.3592618989331	85.8423009278298	80.1426120722537	59.9804049935245
91.3368184573131	91.3154602504556	91.1790900026772	90.9054970125833	90.441376942446	89.6717715009133	88.3421744447175	85.8213691188229	80.112461635243	59.9135373043817
91.3231764858289	91.3018829453736	91.165478331484	90.8916962508602	90.4271192862017	89.656572788393	88.3251103244167	85.8004642838935	80.0823464871256	59.8467227430823
91.3095542880748	91.2883253936236	91.1518865459928	90.8779156565975	90.412882287677	89.6413956224851	88.3080694887567	85.7795863656253	80.0522665547644	59.7799611964124
91.2959518381396	91.2747875676877	91.1383146156246	90.8641551952363	90.3986659079024	89.6262399595386	88.2910518886105	85.7587353067888	80.0222217652689	59.713252551556
91.2823691100706	91.2612694400216	91.1247625098012	90.8504148322533	90.3844701079818	89.6111057560129	88.274057474998	85.7379110503405	79.9922120459942	59.6465966960931
91.2688060778741	91.2477709830548	91.1112301979451	90.8366945331608	90.3702948490923	89.595992968478	88.257086199085	85.7171135394221	79.9622373245404	59.5799935179979
91.2552627155167	91.234292169192	91.0977176494803	90.8229942635069	90.3561400924843	89.5809015536135	88.2401380121827	85.6963427173597	79.9322975287505	59.5134429056362
91.2417389969252	91.2208329708132	91.0842248338328	90.8093139888755	90.3420057994812	89.5658314682092	88.2232128657473	85.6755985276625	79.9023925867096	59.446944747764
91.2282348959884	91.2073933602743	91.0707517204309	90.795653674887	90.3278919314797	89.5507826691639	88.2063107113792	85.6548809140224	79.8725224267438	59.3804989335253
91.2147503865568	91.1939733099083	91.0572982787058	90.7820132871981	90.3137984499494	89.5357551134855	88.1894315008222	85.634189820313	79.8426869774189	59.31410535245
91.2012854424442	91.1805727920254	91.043864478092	90.7683927915025	90.2997253164331	89.5207487582906	88.1725751859635	85.6135251905886	79.812886167539	59.247763894452
91.1878400374277	91.1671917789136	91.0304502880278	90.7547921535304	90.2856724925464	89.5057635608042	88.1557417188325	85.5928869690836	79.7831199261458	59.1814744498275
91.1744141452488	91.15383024284	91.0170556779555	90.7412113390494	90.2716399399777	89.4907994783593	88.1389310516007	85.5722751002115	79.7533881825169	59.1152369092528
91.1610077396143	91.1404881560505	91.0036806173224	90.7276503138644	90.2576276204885	89.4758564683965	88.1221431365806	85.5516895285641	79.723690866165	59.0490511637824
91.1476207941965	91.1271654907711	90.9903250755805	90.7141090438177	90.2436354959129	89.4609344884638	88.1053779262257	85.5311301989107	79.6940279068364	58.9829171048473
91.1342532826342	91.1138622192082	90.9769890221877	90.7005874947895	90.2296635281578	89.4460334962165	88.0886353731294	85.5105970561972	79.6643992345104	58.9168346242528
91.1209051785336	91.1005783135492	90.9636724266076	90.6870856326979	90.2157116792028	89.4311534494162	88.0719154300249	85.4900900455454	79.6348047793975	58.8508036141768
91.1075764554686	91.0873137459634	90.9503752583103	90.6736034234992	90.2017799110998	89.4162943059313	88.0552180497841	85.469609112252	79.6052444719389	58.7848239671682
91.0942670869814	91.0740684886021	90.9370974867727	90.660140833188	90.1878681859736	89.4014560237359	88.0385431854177	85.4491542017881	79.5757182428047	58.7188955761444
91.080977046584	91.0608425135995	90.9238390814789	90.6466978277973	90.1739764660213	89.3866385609102	88.0218907900739	85.4287252597981	79.5462260228935	58.6530183343901
91.0677063077577	91.0476357930734	90.9106000119207	90.633274373399	90.1601047135124	89.3718418756396	88.0052608170383	85.4083222320989	79.5167677433307	58.5871921355549
91.0544548439548	91.0344482991254	90.8973802475979	90.6198704361039	90.1462528907889	89.3570659262147	87.9886532197333	85.3879450646792	79.4873433354677	58.521416873652
91.0412226285986	91.0212800038419	90.8841797580188	90.6064859820619	90.1324209602648	89.3423106710308	87.9720679517176	85.3675937036991	79.4579527308805	58.4556924430561
91.0280096350844	91.0081308792943	90.8709985127007	90.593120977462	90.1186088844265	89.3275760685879	87.9555049666852	85.3472680954884	79.4285958613693	58.3900187385016
91.0148158367802	90.9950008975398	90.8578364811699	90.5797753885331	90.1048166258325	89.3128620774898	87.9389642184654	85.3269681865467	79.3992726589564	58.324395655081
91.0016412070269	90.9818900306219	90.8446936329625	90.5664491815431	90.0910441471134	89.2981686564445	87.9224456610219	85.306693923542	79.369983055886	58.2588230882428
90.9884857191394	90.9687982505708	90.8315699376248	90.5531423228004	90.0772914109716	89.2834957642633	87.9059492484527	85.2864452533106	79.3407269846227	58.1933009337902
90.9753493464072	90.9557255294043	90.8184653647134	90.5398547786528	90.0635583801818	89.2688433598607	87.8894749349888	85.2662221228556	79.3115043778504	58.127829087879
90.9622320620948	90.9426718391279	90.8053798837957	90.5265865154887	90.0498450175902	89.2542114022543	87.8730226749945	85.2460244793465	79.2823151684717	58.0624074470158
90.9491338394425	90.9296371517358	90.7923134644504	90.5133374997365	90.036151286115	89.2395998505641	87.8565924229661	85.2258522701185	79.2531592896061	57.9970359080565
90.936054651667	90.9166214392111	90.7792660762678	90.5001076978653	90.0224771487459	89.2250086640125	87.840184133532	85.2057054426716	79.2240366745895	57.9317143682047
90.9229944719619	90.9036246735265	90.7662376888501	90.4868970763848	90.0088225685446	89.2104378019237	87.8237977614518	85.1855839446701	79.1949472569732	57.8664427250095
90.9099532734985	90.8906468266447	90.7532282718118	90.4737056018455	89.995187508644	89.1958872237238	87.807433261616	85.1654877239414	79.1658909705226	57.8012208763644
90.8969310294264	90.877687870519	90.7402377947803	90.4605332408387	89.9815719322486	89.1813568889399	87.7910905890451	85.1454167284756	79.136867749216	57.7360487205051
90.883927712874	90.864747777094	90.7272662273959	90.4473799599972	89.9679758026343	89.1668467572006	87.7747696988896	85.1253709064247	79.1078775272444	57.6709261560081
90.8709432969491	90.8518265183056	90.7143135393124	90.4342457259947	89.9543990831485	89.1523567882348	87.7584705464291	85.1053502061021	79.0789202390093	57.605853081789
90.8579777547394	90.8389240660822	90.7013797001972	90.4211305055466	89.9408417372096	89.137886941872	87.7421930870718	85.0853545759811	79.0499958191228	57.5408293971009
90.8450310593135	90.8260403923446	90.688464679732	90.4080342654097	89.9273037283073	89.1234371780419	87.7259372763541	85.0653839646953	79.021104202406	57.4758550015327
90.8321031837211	90.8131754690068	90.675568447613	90.3949569723826	89.9137850200025	89.1090074567741	87.7097030699403	85.0454383210369	78.992245323888	57.4109297950071
90.8191941009936	90.8003292679765	90.6626909735512	90.3818985933058	89.9002855759268	89.0945977381974	87.6934904236216	85.0255175939564	78.9634191188052	57.3460536777799
90.8063037841448	90.7875017611555	90.6498322272725	90.3688590950618	89.8868053597831	89.08020798254	87.677299293316	85.0056217325621	78.9346255226	57.2812265504375
90.7934322061716	90.7746929204403	90.6369921785188	90.3558384445751	89.8733443353448	89.0658381501292	87.6611296350676	84.985750686119	78.9058644709203	57.2164483138957
90.7805793400542	90.7619027177224	90.6241707970474	90.3428366088125	89.8599024664565	89.0514882013906	87.644981405046	84.9659044040482	78.8771358996179	57.1517188693979
90.767745158757	90.749131124889	90.611368052632	90.3298535547836	89.8464797170331	89.0371580968483	87.6288545595462	84.9460828359263	78.8484397447479	57.0870381185138
90.7549296352289	90.7363781138232	90.5985839150627	90.31688924954	89.8330760510603	89.0228477971245	87.6127490549878	84.9262859314849	78.8197759425678	57.0224059631378
90.7421327424042	90.7236436564048	90.5858183541464	90.3039436601764	89.8196914325942	89.0085572629389	87.5966648479144	84.9065136406093	78.7911444295364	56.957822305487
90.7293544532028	90.7109277245106	90.5730713397072	90.2910167538301	89.8063258257616	88.9942864551089	87.5806018949934	84.8867659133384	78.762545142313	56.8932870481002
90.7165947405308	90.6982302900147	90.5603428415867	90.2781084976815	89.7929791947592	88.9800353345488	87.5645601530153	84.8670426998638	78.7339780177561	56.8288000938362
90.7038535772812	90.6855513247894	90.5476328296441	90.2652188589537	89.7796515038544	88.96580386227	87.5485395788935	84.8473439505292	78.705442992923	56.764361345872
90.6911309363345	90.6728908007052	90.5349412737569	90.2523478049135	89.7663427173846	88.9515919993802	87.5325401296633	84.8276696158295	78.6769400050683	56.6999707077015
90.6784267905587	90.6602486896315	90.5222681438207	90.2394953028706	89.7530527997573	88.9373997070836	87.516561762482	84.8080196464104	78.6484689916436	56.6356280831342
90.6657411128107	90.6476249634368	90.5096134097502	90.2266613201783	89.73978171545	88.9232269466802	87.5006044346281	84.7883939930676	78.6200298902961	56.5713333762931
90.6530738759359	90.6350195939896	90.4969770414786	90.2138458242335	89.7265294290101	88.9090736795657	87.4846681035007	84.7687926067462	78.5916226388677	56.5070864916139
90.6404250527694	90.6224325531584	90.4843590089589	90.2010487824765	89.7132959050549	88.8949398672314	87.4687527266194	84.7492154385399	78.5632471753945	56.4428873338431
90.6277946161362	90.6098638128123	90.4717592821633	90.1882701623916	89.7000811082713	88.8808254712635	87.4528582616236	84.7296624396906	78.5349034381054	56.3787358080364
90.6151825388518	90.5973133448216	90.4591778310842	90.1755099315069	89.686885003416	88.8667304533432	87.436984666272	84.7101335615875	78.5065913654215	56.3146318195577
90.6025887937226	90.5847811210578	90.4466146257338	90.1627680573945	89.6737075553153	88.8526547752459	87.4211318984423	84.6906287557665	78.4783108959554	56.2505752740774
90.5900133535465	90.5722671133945	90.434069636145	90.1500445076706	89.6605487288648	88.8385983988417	87.4052999161305	84.6711479739099	78.4500619685097	56.1865660775706
90.5774561911134	90.5597712937075	90.4215428323715	90.1373392499955	89.6474084890295	88.8245612860945	87.3894886774507	84.6516911678452	78.4218445220766	56.1226041363165
90.5649172792058	90.5472936338753	90.4090341844879	90.124652252074	89.6342868008439	88.8105433990618	87.3736981406344	84.6322582895448	78.3936584958371	56.0586893568961
90.5523965905989	90.5348341057796	90.39654366259	90.1119834816551	89.6211836294114	88.7965446998946	87.3579282640304	84.6128492911252	78.3655038291597	55.9948216461913
90.5398940980615	90.5223926813055	90.3840712367953	90.0993329065324	89.6080989399047	88.7825651508369	87.3421790061037	84.5934641248469	78.3373804615998	55.9310009113833
90.5274097743563	90.5099693323423	90.3716168772433	90.086700494544	89.5950326975654	88.7686047142259	87.3264503254358	84.5741027431128	78.3092883328991	55.8672270599512
90.5149435922403	90.4975640307834	90.3591805540953	90.0740862135729	89.5819848677042	88.754663352491	87.3107421807238	84.5547650984686	78.2812273829841	55.8034999996708
90.5024955244655	90.485176748527	90.3467622375351	90.0614900315467	89.5689554157004	88.7407410281541	87.2950545307801	84.5354511436014	78.2531975519658	55.7398196386129
90.4900655437792	90.4728074574764	90.3343618977691	90.048911916438	89.5559443070022	88.7268377038291	87.2793873345318	84.5161608313395	78.2251987801388	55.6761858851422
90.4776536229243	90.4604561295407	90.3219795050268	90.0363518362642	89.5429515071263	88.7129533422215	87.2637405510205	84.4968941146518	78.19723100798	55.6125986479156
90.4652597346403	90.4481227366345	90.3096150295606	90.0238097590879	89.5299769816581	88.6990879061285	87.2481141394016	84.477650946647	78.1692941761485	55.5490578358814
90.4528838516632	90.4358072506789	90.2972684416465	90.011285653017	89.5170206962513	88.6852413584383	87.232508058944	84.4584312805731	78.1413882254842	55.4855633582772
90.440525946726	90.4235096436019	90.2849397115839	89.9987794862042	89.5040826166279	88.6714136621302	87.2169222690298	84.4392350698168	78.113513097007	55.4221151246292
90.4281859925598	90.411229887338	90.2726288096964	89.9862912268478	89.4911627085784	88.6576047802741	87.2013567291536	84.4200622679028	78.0856687319165	55.3587130447507
90.4158639618932	90.3989679538296	90.2603357063316	89.9738208431917	89.4782609379613	88.6438146760301	87.1858113989222	84.4009128284935	78.0578550715906	55.2953570287404
90.4035598274536	90.3867238150266	90.2480603718616	89.9613683035248	89.4653772707031	88.6300433126487	87.1702862380543	84.3817867053879	78.0300720575848	55.2320469869816
90.3912735619672	90.3744974428874	90.2358027766829	89.9489335761819	89.4525116727984	88.6162906534701	87.1547812063797	84.3626838525217	78.0023196316319	55.1687828301406
90.3790051381598	90.3622888093785	90.2235628912172	89.9365166295433	89.4396641103096	88.6025566619241	87.1392962638392	84.3436042239659	77.9745977356405	55.1055644691655
90.3667545287566	90.3500978864755	90.211340685911	89.9241174320352	89.4268345493669	88.5888413015298	87.1238313704842	84.3245477739272	77.9469063116946	55.0423918152847
90.3545217064833	90.3379246461632	90.1991361312364	89.9117359521293	89.4140229561681	88.5751445358954	87.108386486476	84.3055144567463	77.9192453020528	54.9792647800061
90.3423066440661	90.325769060436	90.1869491976909	89.8993721583433	89.4012292969786	88.5614663287178	87.0929615720857	84.2865042268984	77.8916146491474	54.916183275115
90.3301093142324	90.3136311012982	90.1747798557979	89.8870260192408	89.3884535381314	88.5478066437825	87.0775565876935	84.2675170389918	77.8640142955838	54.8531472126739
90.3179296897108	90.3015107407644	90.1626280761068	89.8746975034315	89.3756956460267	88.5341654449631	87.0621714937884	84.248552847768	77.8364441841393	54.7901565050201
90.3057677432318	90.2894079508597	90.1504938291931	89.8623865795711	89.362955587132	88.5205426962215	87.046806250968	84.2296116081004	77.8089042577631	54.7272110647656
90.2936234475286	90.2773227036204	90.138377085659	89.8500932163614	89.3502333279821	88.506938361607	87.0314608199376	84.2106932749944	77.7813944595746	54.6643108047946
90.2814967753364	90.2652549710939	90.1262778161333	89.8378173825503	89.3375288351787	88.4933524052566	87.0161351615104	84.1917978035868	77.7539147328634	54.6014556382635
90.2693876993941	90.2532047253391	90.1141959912716	89.8255590469323	89.3248420753907	88.4797847913945	87.0008292366066	84.1729251491445	77.7264650210882	54.5386454785988
90.2572961924436	90.2411719384273	90.1021315817568	89.8133181783478	89.3121730153536	88.4662354843316	86.9855430062531	84.154075267065	77.6990452678759	54.4758802394961
90.245222227231	90.2291565824415	90.0900845582988	89.801094745684	89.29952162187	88.4527044484658	86.9702764315833	84.1352481128751	77.6716554170213	54.413159834919
90.2331657765063	90.2171586294778	90.0780548916354	89.7888887178741	89.2868878618088	88.4391916482813	86.9550294738366	84.1164436422307	77.6442954124861	54.350484179098
90.2211268130244	90.2051780516449	90.0660425525319	89.7767000638983	89.2742717021058	88.4256970483486	86.9398020943578	84.097661810916	77.6169651983978	54.2878531865289
90.2091053095452	90.1932148210648	90.0540475117816	89.7645287527829	89.2616731097631	88.4122206133239	86.9245942545972	84.0789025748433	77.5896647190499	54.2252667719718
90.1971012388337	90.1812689098732	90.0420697402058	89.752374753601	89.2490920518491	88.3987623079493	86.9094059161094	84.0601658900521	77.5623939189002	54.1627248504502
90.1851145736611	90.1693402902194	90.0301092086544	89.7402380354725	89.2365284954988	88.3853220970523	86.8942370405539	84.041451712709	77.5351527425705	54.1002273372492
90.1731452868043	90.1574289342671	90.0181658880057	89.7281185675639	89.2239824079129	88.3718999455455	86.8790875896938	84.0227599991067	77.507941134846	54.037774147915
90.161193351047	90.1455348141942	90.0062397491665	89.7160163190885	89.2114537563585	88.3584958184263	86.8639575253961	84.0040907056638	77.4807590406744	53.9753651982532
90.1492587391795	90.1336579021938	89.9943307630729	89.7039312593062	89.1989425081685	88.3451096807771	86.8488468096309	83.9854437889241	77.4536064051653	53.913000404328
90.1373414239996	90.1217981704735	89.9824389006899	89.6918633575241	89.1864486307419	88.3317414977644	86.8337554044711	83.9668192055562	77.4264831735891	53.8506796824608
90.1254413783124	90.1099555912568	89.9705641330116	89.6798125830961	89.173972091543	88.3183912346391	86.8186832720921	83.948216912353	77.399389291377	53.788402949229
90.1135585749312	90.0981301367825	89.9587064310619	89.6677789054229	89.1615128581022	88.3050588567359	86.8036303747714	83.929636866231	77.3723247041197	53.7261701214654
90.1016929866772	90.0863217793053	89.9468657658943	89.6557622939525	89.1490708980151	88.2917443294732	86.7885966748883	83.91107902423	77.3452893575669	53.6639811162563
90.0898445863806	90.0745304910965	89.9350421085918	89.6437627181797	89.1366461789431	88.278447618353	86.7735821349231	83.8925433435124	77.3182831976267	53.6018358509409
90.0780133468804	90.0627562444436	89.9232354302678	89.6317801476465	89.1242386686126	88.2651686889601	86.7585867174575	83.8740297813629	77.2913061703648	53.53973424311
90.0661992410247	90.0509990116509	89.9114457020657	89.6198145519421	89.1118483348154	88.2519075069626	86.7436103851734	83.8555382951879	77.2643582220038	53.477676210605
90.0544022416717	90.0392587650399	89.8996728951593	89.6078659007027	89.0994751454085	88.2386640381112	86.7286531008532	83.8370688425148	77.2374392989228	53.4156616715166
90.0426223216892	90.0275354769493	89.8879169807528	89.5959341636118	89.0871190683137	88.2254382482391	86.7137148273787	83.8186213809918	77.2105493476561	53.3536905441837
90.0308594539555	90.0158291197356	89.8761779300813	89.5840193104003	89.0747800715179	88.2122301032616	86.6987955277317	83.8001958683875	77.1836883148931	53.2917627471928
90.0191136113593	90.0041396657729	89.8644557144107	89.572121310846	89.0624581230729	88.1990395691761	86.6838951649928	83.7817922625899	77.1568561474777	53.2298781993761
90.0073847668004	89.9924670874538	89.8527503050377	89.5602401347744	89.0501531910949	88.1858666120616	86.6690137023414	83.7634105216063	77.1300527924069	53.1680368198111
89.99567289319	89.980811357189	89.8410616732906	89.5483757520581	89.0378652437649	88.1727111980787	86.6541511030552	83.7450506035628	77.1032781968311	53.1062385278191
89.9839779634507	89.9691724474081	89.8293897905286	89.5365281326173	89.0255942493285	88.1595732934693	86.63930733051	83.7267124667037	77.0765323080525	53.0444832429645
89.9722999505171	89.9575503305594	89.8177346281429	89.5246972464195	89.0133401760955	88.1464528645563	86.6244823481793	83.7083960693911	77.0498150735253	52.9827708850534
89.9606388273359	89.9459449791106	89.8060961575558	89.5128830634796	89.0011029924401	88.1333498777433	86.6096761196339	83.6901013701042	77.0231264408545	52.9211013741327
89.9489945668664	89.9343563655487	89.7944743502219	89.5010855538601	88.9888826668006	88.1202642995145	86.5948886085413	83.6718283274393	76.9964663577953	52.859474630489
89.9373671420809	89.9227844623805	89.7828691776276	89.4893046876708	88.9766791676796	88.1071960964344	86.5801197786659	83.6535769001088	76.9698347722528	52.7978905746478
89.9257565259645	89.9112292421326	89.7712806112913	89.4775404350692	88.9644924636433	88.0941452351478	86.5653695938683	83.635347046941	76.943231632281	52.7363491273721
89.9141626915159	89.899690677352	89.7597086227638	89.4657927662604	88.9523225233222	88.0811116823789	86.5506380181047	83.6171387268798	76.9166568860823	52.6748502096614
89.9025856117477	89.8881687406058	89.7481531836283	89.4540616514969	88.9401693154101	88.0680954049321	86.5359250154273	83.5989518989836	76.8901104820068	52.6133937427511
89.8910252596862	89.876663404482	89.7366142655005	89.4423470610789	88.9280328086648	88.0550963696906	86.5212305499831	83.5807865224257	76.863592368552	52.5519796481109
89.8794816083723	89.8651746415895	89.7250918400289	89.4306489653543	88.9159129719076	88.0421145436172	86.5065545860141	83.5626425564931	76.8371024943616	52.4906078474443
89.8679546308613	89.8537024245582	89.7135858788949	89.4189673347185	88.9038097740231	88.0291498937534	86.4918970878569	83.5445199605866	76.8106408082253	52.4292782626873
89.8564443002234	89.8422467260395	89.7020963538125	89.4073021396146	88.8917231839594	88.0162023872194	86.4772580199421	83.5264186942198	76.7842072590783	52.3679908160073
89.844950589544	89.8308075187063	89.6906232365294	89.3956533505336	88.8796531707276	88.0032719912141	86.4626373467942	83.5083387170191	76.757801796	52.3067454298025
89.8334734719241	89.8193847752533	89.6791664988261	89.3840209380138	88.8675997034021	87.9903586730144	86.4480350330313	83.490279988723	76.7314243682142	52.2455420267007
89.8220129204803	89.8079784683974	89.6677261125166	89.3724048726416	88.8555627511204	87.9774623999752	86.4334510433644	83.4722424691819	76.7050749250882	52.184380529558
89.8105689083451	89.7965885708777	89.6563020494486	89.360805125051	88.8435422830826	87.9645831395295	86.4188853425976	83.4542261183574	76.6787534161318	52.1232608614584
89.7991414086673	89.7852150554556	89.6448942815031	89.3492216659236	88.8315382685519	87.9517208591875	86.4043378956273	83.4362308963218	76.6524597909974	52.0621829457126
89.7877303946125	89.7738578949156	89.6335027805953	89.3376544659891	88.819550676854	87.9388755265369	86.389808667442	83.4182567632579	76.6261939994788	52.0011467058566
89.7763358393627	89.7625170620647	89.622127518674	89.3261034960247	88.8075794773774	87.9260471092427	86.3752976231223	83.4003036794586	76.5999559915109	51.9401520656517
89.7649577161173	89.7511925297332	89.6107684677222	89.3145687268556	88.7956246395728	87.9132355750464	86.3608047278401	83.3823716053261	76.5737457171692	51.8791989490824
89.7535959980927	89.739884270775	89.5994255997568	89.3030501293545	88.7836861329534	87.9004408917666	86.3463299468583	83.3644605013719	76.5475631266689	51.8182872803564
89.7422506585233	89.7285922580671	89.5880988868292	89.2915476744423	88.7717639270947	87.887663027298	86.3318732455311	83.3465703282159	76.5214081703645	51.7574169839032
89.730921670661	89.7173164645106	89.5767883010253	89.2800613330874	88.7598579916343	87.8749019496118	86.3174345893027	83.3287010465865	76.4952807987494	51.6965879843732
89.7196090077759	89.7060568630305	89.5654938144651	89.2685910763064	88.747968296272	87.8621576267551	86.3030139437078	83.3108526173197	76.469180962455	51.6358002066368
89.7083126431564	89.6948134265757	89.5542153993036	89.2571368751633	88.7360948107692	87.8494300268507	86.2886112743711	83.2930250013591	76.4431086122501	51.5750535757834
89.6970325501095	89.6835861281199	89.5429530277304	89.2456987007703	88.7242375049496	87.8367191180973	86.2742265470065	83.2752181597549	76.4170636990409	51.5143480171209
89.6857687019612	89.672374940661	89.53170667197	89.2342765242872	88.7123963486981	87.8240248687686	86.2598597274173	83.2574320536643	76.3910461738696	51.4536834561741
89.6745210720562	89.6611798372217	89.5204763042818	89.2228703169219	88.7005713119616	87.8113472472136	86.2455107814959	83.2396666443501	76.3650559879145	51.3930598186842
89.6632896337589	89.6500007908499	89.5092618969602	89.2114800499301	88.6887623647485	87.7986862218563	86.231179675223	83.2219218931813	76.3390930924893	51.3324770306079
89.652074360453	89.6388377746184	89.4980634223349	89.2001056946153	88.6769694771283	87.7860417611954	86.2168663746678	83.2041977616318	76.313157439042	51.2719350181166
89.6408752255421	89.6276907616253	89.486880852771	89.1887472223288	88.6651926192321	87.773413833804	86.2025708459874	83.1864942112805	76.2872489791553	51.2114337075949
89.6296922024498	89.6165597249944	89.4757141606686	89.1774046044699	88.6534317612521	87.7608024083295	86.1882930554267	83.1688112038109	76.2613676645452	51.1509730256406
89.6185252646198	89.6054446378751	89.4645633184638	89.1660778124858	88.6416868734415	87.7482074534936	86.1740329693177	83.1511487010104	76.235513447061	51.0905528990631
89.6073743855164	89.5943454734425	89.4534282986279	89.1547668178715	88.6299579261145	87.7356289380915	86.1597905540798	83.13350666477	76.2096862786843	51.0301732548828
89.5962395386247	89.583262204898	89.4423090736681	89.1434715921699	88.6182448896462	87.7230668309925	86.1455657762188	83.1158850570842	76.183886111529	50.9698340203303
89.5851206974504	89.5721948054692	89.4312056161272	89.1321921069718	88.6065477344724	87.7105211011388	86.1313586023274	83.09828384005	76.1581128978402	50.9095351228454
89.5740178355208	89.56114324841	89.4201178985841	89.1209283339157	88.5948664310896	87.6979917175464	86.1171689990839	83.0807029758672	76.1323665899941	50.8492764900763
89.5629309263841	89.5501075070008	89.4090458936535	89.1096802446883	88.5832009500548	87.685478649304	86.1029969332528	83.0631424268373	76.1066471404972	50.7890580498787
89.5518599436102	89.539087554549	89.3979895739865	89.0984478110237	88.5715512619854	87.6729818655731	86.0888423716842	83.0456021553639	76.0809545019859	50.7288797303149
89.540804860791	89.5280833643888	89.3869489122699	89.0872310047043	88.5599173375593	87.6605013355881	86.0747052813132	83.0280821239514	76.0552886272258	50.668741459653
89.5297656515401	89.5170949098814	89.3759238812271	89.0760297975602	88.5482991475143	87.6480370286554	86.0605856291599	83.0105822952054	76.0296494691116	50.6086431663663
89.5187422894935	89.5061221644154	89.3649144536178	89.0648441614692	88.5366966626485	87.635588914154	86.0464833823293	82.9931026318318	76.004036980666	50.548584779132
89.5077347483095	89.4951651014066	89.353920602238	89.0536740683571	88.5251098538201	87.6231569615346	86.0323985080104	82.9756430966368	75.9784511150397	50.4885662268307
89.4967430016691	89.4842236942986	89.3429422999204	89.0425194901974	88.5135386919469	87.6107411403199	86.0183309734765	82.958203652526	75.9528918255105	50.4285874385453
89.4857670232759	89.4732979165626	89.3319795195341	89.0313803990117	88.5019831480067	87.598341420104	86.0042807460847	82.9407842625046	75.9273590654829	50.3686483435606
89.4748067868567	89.4623877416978	89.3210322339852	89.020256766869	88.490443193037	87.5859577705526	85.9902477932754	82.9233848896767	75.9018527884878	50.308748871362
89.4638622661616	89.4514931432313	89.3101004162162	89.0091485658864	88.4789187981345	87.5735901614024	85.9762320825724	82.906005497245	75.8763729481817	50.248888951635
89.4529334349638	89.4406140947185	89.2991840392068	88.9980557682288	88.4674099344559	87.5612385624611	85.9622335815823	82.8886460485103	75.8509194983464	50.1890685142644
89.4420202670604	89.429750569743	89.2882830759735	88.9869783461086	88.4559165732168	87.5489029436074	85.9482522579943	82.8713065068712	75.8254923928884	50.1292874893331
89.4311227362719	89.4189025419173	89.2773974995697	88.9759162717863	88.4444386856923	87.5365832747903	85.9342880795799	82.8539868358238	75.8000915858383	50.0695458071219
89.4202408164432	89.408069984882	89.266527283086	88.96486951757	88.4329762432164	87.5242795260293	85.9203410141929	82.8366869989615	75.7747170313506	50.0098433981082
89.4093744814432	89.3972528723069	89.2556723996502	88.9538380558155	88.4215292171824	87.5119916674142	85.9064110297686	82.8194069599741	75.7493686837029	49.9501801929654
89.3985237051649	89.3864511778905	89.2448328224272	88.9428218589264	88.4100975790422	87.4997196691046	85.8924980943239	82.8021466826479	75.7240464972956	49.8905561225622
89.3876884615262	89.3756648753605	89.2340085246194	88.9318208993539	88.3986813003068	87.48746350133	85.8786021759569	82.7849061308651	75.6987504266513	49.8309711179617
89.3768687244695	89.3648939384739	89.2231994794665	88.9208351495971	88.3872803525458	87.4752231343895	85.8647232428467	82.7676852686036	75.6734804264145	49.7714251104206
89.366064467962	89.3541383410168	89.2124056602456	88.9098645822026	88.3758947073872	87.4629985386514	85.8508612632531	82.7504840599365	75.6482364513508	49.7119180313885
89.3552756659962	89.3433980568051	89.2016270402713	88.8989091697648	88.3645243365178	87.4507896845536	85.837016205516	82.7333024690318	75.6230184563467	49.652449812507
89.3445022925896	89.332673059684	89.190863592896	88.8879688849255	88.3531692116825	87.4385965426026	85.8231880380556	82.7161404601521	75.597826396409	49.5930203856093
89.3337443217852	89.3219633235287	89.1801152915095	88.8770437003745	88.3418293046846	87.426419083374	85.8093767293721	82.6989979976542	75.5726602266643	49.533629682719
89.3230017276516	89.3112688222443	89.1693821095394	88.8661335888489	88.3305045873855	87.4142572775119	85.7955822480451	82.6818750459886	75.5475199023588	49.4742776360494
89.3122744842831	89.3005895297658	89.1586640204512	88.8552385231335	88.3191950317048	87.4021110957288	85.7818045627333	82.6647715696994	75.5224053788572	49.4149641780031
89.3015625657998	89.2899254200584	89.1479609977482	88.8443584760606	88.3079006096197	87.3899805088055	85.7680436421748	82.6476875334239	75.497316611643	49.3556892411709
89.290865946348	89.2792764671176	89.1372730149714	88.8334934205102	88.2966212931657	87.3778654875909	85.7542994551861	82.6306229018919	75.4722535563176	49.2964527583312
89.2801846001003	89.2686426449692	89.1266000457001	88.8226433294096	88.2853570544356	87.3657660030016	85.7405719706626	82.6135776399258	75.4472161685997	49.2372546624492
89.2695185012554	89.2580239276698	89.1159420635515	88.8118081757339	88.27410786558	87.353682026022	85.7268611575775	82.5965517124403	75.4222044043253	49.1780948866762
89.2588676240389	89.2474202893063	89.1052990421806	88.8009879325055	88.2628736988071	87.3416135277039	85.7131669849823	82.5795450844416	75.3972182194469	49.118973364349
89.2482319427027	89.2368317039967	89.0946709552811	88.7901825727941	88.2516545263824	87.3295604791664	85.6994894220059	82.5625577210273	75.3722575700331	49.0598900289888
89.237611431526	89.2262581458895	89.0840577765843	88.7793920697172	88.2404503206286	87.3175228515959	85.6858284378549	82.5455895873861	75.3473224122683	49.0008448143009
89.2270060648147	89.2156995891645	89.0734594798603	88.7686163964393	88.2292610539257	87.3055006162454	85.6721840018129	82.5286406487976	75.3224127024521	48.9418376541738
89.216415816902	89.2051560080326	89.0628760389171	88.7578555261728	88.2180866987109	87.2934937444348	85.6585560832405	82.5117108706316	75.2975283969987	48.8828684826784
89.2058406621482	89.1946273767359	89.0523074276012	88.7471094321769	88.206927227478	87.2815022075506	85.6449446515749	82.494800218348	75.2726694524368	48.8239372340674
89.1952805749413	89.1841136695476	89.0417536197976	88.7363780877585	88.1957826127781	87.2695259770454	85.6313496763298	82.4779086574965	75.2478358254092	48.7650438427746
89.1847355296967	89.1736148607728	89.0312145894295	88.7256614662717	88.1846528272188	87.2575650244383	85.6177711270949	82.4610361537162	75.2230274726718	48.7061882434141
89.1742055008578	89.1631309247477	89.0206903104589	88.7149595411178	88.1735378434643	87.2456193213143	85.6042089735359	82.4441826727351	75.1982443510936	48.6473703707797
89.1636904628956	89.1526618358406	89.0101807568863	88.7042722857456	88.1624376342356	87.2336888393239	85.5906631853942	82.4273481803701	75.1734864176565	48.5885901598442
89.1531903903092	89.1422075684512	88.9996859027505	88.6935996736508	88.1513521723099	87.2217735501837	85.5771337324864	82.4105326425265	75.1487536294542	48.5298475457586
89.142705257626	89.1317680970113	88.9892057221293	88.6829416783764	88.1402814305208	87.2098734256754	85.5636205847042	82.3937360251978	75.1240459436922	48.4711424638517
89.1322350394015	89.1213433959847	88.978740189139	88.6722982735128	88.1292253817582	87.1979884376462	85.5501237120146	82.3769582944649	75.0993633176873	48.4124748496289
89.1217797102198	89.1109334398671	88.9682892779348	88.6616694326973	88.1181839989679	87.1861185580081	85.5366430844586	82.3601994164966	75.0747057088674	48.3538446387721
89.1113392446933	89.1005382031865	88.9578529627104	88.6510551296142	88.107157255152	87.1742637587383	85.5231786721522	82.3434593575486	75.0500730747704	48.2952517671385
89.1009136174635	89.0901576605032	88.9474312176986	88.6404553379952	88.0961451233682	87.1624240118785	85.5097304452851	82.3267380839633	75.0254653730447	48.2366961707604
89.0905028032003	89.0797917864098	88.9370240171708	88.6298700316188	88.0851475767303	87.1505992895351	85.4962983741212	82.3100355621699	75.0008825614479	48.1781777858443
89.0801067766029	89.0694405555315	88.9266313354375	88.6192991843106	88.0741645884075	87.1387895638787	85.4828824289977	82.2933517586835	74.976324597847	48.1196965487701
89.0697255123992	89.0591039425259	88.916253146848	88.6087427699431	88.0631961316247	87.1269948071442	85.4694825803256	82.2766866401053	74.9517914402177	48.0612523960908
89.0593589853467	89.0487819220833	88.9058894257907	88.5982007624359	88.0522421796623	87.1152149916305	85.4560987985888	82.2600401731219	74.9272830466441	48.0028452645314
89.0490071702319	89.0384744689269	88.8955401466928	88.5876731357554	88.0413027058561	87.1034500897003	85.4427310543441	82.2434123245051	74.9027993753182	47.9444750909886
89.0386700418709	89.0281815578125	88.8852052840208	88.5771598639148	88.0303776835971	87.09170007378	85.4293793182213	82.2268030611119	74.8783403845395	47.8861418125302
89.0283475751093	89.017903163529	88.87488481228	88.5666609209744	88.0194670863313	87.0799649163595	85.4160435609222	82.2102123498837	74.8539060327148	47.8278453663939
89.0180397448224	89.0076392608984	88.8645787060151	88.556176281041	88.0085708875601	87.0682445899919	85.4027237532211	82.1936401578463	74.8294962783574	47.7695856899874
89.0077465259153	88.9973898247754	88.8542869398096	88.5457059182684	87.9976890608395	87.0565390672935	85.3894198659642	82.1770864521095	74.805111080087	47.7113627208873
88.9974678933231	88.9871548300484	88.8440094882864	88.5352498068571	87.9868215797806	87.0448483209436	85.3761318700695	82.1605511998669	74.7807503966294	47.6531763968386
88.9872038220107	88.9769342516387	88.8337463261077	88.5248079210542	87.9759684180489	87.0331723236842	85.3628597365264	82.1440343683954	74.7564141868156	47.5950266557538
88.9769542869733	88.966728064501	88.8234974279745	88.5143802351536	87.965129549365	87.0215110483201	85.3496034363954	82.1275359250552	74.732102409582	47.5369134357128
88.9667192632363	88.9565362436236	88.8132627686276	88.5039667234957	87.9543049475035	87.0098644677183	85.3363629408085	82.1110558372891	74.7078150239695	47.478836674962
88.9564987258554	88.9463587640281	88.8030423228466	88.4935673604676	87.9434945862938	86.9982325548082	85.323138220968	82.0945940726227	74.6835519891237	47.4207963119134
88.9462926499168	88.9361956007698	88.7928360654508	88.4831821205028	87.9326984396195	86.9866152825814	85.309929248147	82.0781505986636	74.6593132642936	47.3627922851446
88.9361010105374	88.9260467289377	88.7826439712985	88.4728109780817	87.9219164814182	86.9750126240911	85.2967359936891	82.0617253831015	74.6350988088324	47.3048245333975
88.9259237828645	88.9159121236545	88.7724660152876	88.4624539077306	87.9111486856818	86.9634245524527	85.2835584290077	82.0453183937077	74.6109085821959	47.2468929955783
88.9157609420763	88.9057917600765	88.7623021723554	88.4521108840227	87.9003950264561	86.9518510408428	85.2703965255862	82.0289295983347	74.5867425439431	47.1889976107565
88.9056124633819	88.8956856133943	88.7521524174783	88.4417818815774	87.889655477841	86.9402920624998	85.2572502549777	82.0125589649164	74.5626006537353	47.1311383181644
88.8954783220214	88.8855936588321	88.7420167256725	88.4314668750605	87.8789300139899	86.9287475907231	85.2441195888048	81.9962064614672	74.5384828713357	47.0733150571966
88.8853584932658	88.8755158716482	88.7318950719935	88.4211658391842	87.8682186091099	86.9172175988732	85.2310044987591	81.9798720560821	74.5143891566092	47.0155277674093
88.8752529524174	88.8654522271352	88.7217874315362	88.4108787487068	87.8575212374618	86.9057020603717	85.2179049566013	81.9635557169364	74.4903194695222	46.9577763885196
88.8651616748097	88.8554027006195	88.7116937794351	88.4006055784329	87.8468378733599	86.8942009487007	85.2048209341609	81.9472574122852	74.4662737701417	46.9000608604053
88.8550846358077	88.8453672674621	88.7016140908641	88.3903463032135	87.8361684911716	86.8827142374032	85.1917524033359	81.9309771104633	74.4422520186355	46.8423811231037
88.8450218108076	88.835345903058	88.6915483410367	88.3801008979454	87.8255130653178	86.8712419000825	85.1786993360925	81.914714779885	74.4182541752713	46.7847371168118
88.8349731752373	88.8253385828367	88.681496505206	88.3698693375718	87.8148715702724	86.859783910402	85.1656617044653	81.8984703890434	74.3942802004168	46.7271287818849
88.8249387045562	88.815345282262	88.6714585586645	88.3596515970819	87.8042439805626	86.8483402420854	85.1526394805564	81.8822439065106	74.370330054539	46.6695560588366
88.8149183742556	88.8053659768324	88.6614344767445	88.3494476515107	87.7936302707681	86.8369108689163	85.1396326365359	81.8660353009373	74.346403698204	46.6120188883381
88.8049121598585	88.7954006420808	88.6514242348176	88.3392574759396	87.7830304155218	86.8254957647381	85.1266411446412	81.8498445410524	74.3225010920767	46.5545172112174
88.7949200369197	88.7854492535747	88.6414278082952	88.3290810454956	87.7724443895092	86.8140949034538	85.1136649771768	81.8336715956626	74.2986221969203	46.497050968459
88.7849419810261	88.7755117869162	88.6314451726283	88.3189183353517	87.7618721674684	86.8027082590258	85.1007041065144	81.8175164336527	74.2747669735958	46.4396201012032
88.7749779677966	88.7655882177423	88.6214763033075	88.3087693207267	87.7513137241902	86.7913358054758	85.0877585050925	81.8013790239845	74.2509353830621	46.3822245507457
88.7650279728822	88.7556785217245	88.6115211758631	88.2986339768854	87.7407690345175	86.7799775168847	85.074828145416	81.7852593356974	74.2271273863751	46.3248642585367
88.7550919719661	88.7457826745694	88.6015797658649	88.2885122791381	87.7302380733458	86.7686333673923	85.0619130000564	81.7691573379074	74.2033429446879	46.2675391661807
88.745169940764	88.7359006520184	88.5916520489224	88.278404202841	87.7197208156227	86.7573033311974	85.0490130416513	81.7530729998073	74.1795820192499	46.2102492154359
88.7352618550237	88.7260324298476	88.581738000685	88.2683097233959	87.7092172363479	86.7459873825571	85.0361282429042	81.7370062906663	74.1558445714069	46.1529943482134
88.7253676905256	88.7161779838685	88.5718375968414	88.2582288162503	87.6987273105731	86.7346854957874	85.0232585765843	81.7209571798295	74.1321305626006	46.0957745065769
88.7154874230826	88.7063372899273	88.5619508131203	88.248161456897	87.688251013402	86.7233976452623	85.0104040155264	81.704925636718	74.1084399543679	46.0385896327419
88.7056210285401	88.6965103239055	88.55207762529	88.2381076208747	87.6777883199899	86.7121238054142	84.9975645326308	81.6889116308286	74.0847727083413	45.9814396690757
88.6957684827763	88.6866970617195	88.5422180091583	88.2280672837674	87.6673392055439	86.7008639507334	84.9847401008626	81.6729151317332	74.0611287862478	45.9243245580962
88.6859297617021	88.6768974793211	88.532371940573	88.2180404212045	87.6569036453229	86.6896180557682	84.9719306932521	81.6569361090789	74.0375081499092	45.8672442424718
88.6761048412612	88.6671115526973	88.5225393954215	88.2080270088609	87.6464816146369	86.6783860951246	84.959136282894	81.6409745325875	74.0139107612411	45.8101986650206
88.6662936974302	88.6573392578702	88.5127203496308	88.1980270224568	87.6360730888475	86.6671680434659	84.9463568429478	81.6250303720556	73.9903365822533	45.7531877687101
88.6564963062186	88.6475805708974	88.5029147791678	88.1880404377575	87.6256780433676	86.6559638755132	84.9335923466373	81.6091035973537	73.9667855750487	45.6962114966567
88.646712643669	88.6378354678719	88.493122660039	88.178067230574	87.6152964536613	86.6447735660445	84.9208427672502	81.5931941784268	73.9432577018238	45.6392697921249
88.636942685857	88.6281039249218	88.4833439682906	88.1681073767619	87.6049282952436	86.6335970898953	84.9081080781381	81.5773020852932	73.9197529248674	45.5823625985269
88.6271864088913	88.618385918211	88.4735786800085	88.1581608522226	87.5945735436806	86.6224344219575	84.8953882527166	81.5614272880452	73.8962712065612	45.5254898594224
88.6174437889139	88.6086814239387	88.4638267713186	88.1482276329019	87.5842321745894	86.6112855371803	84.8826832644645	81.545569756848	73.8728125093788	45.4686515185174
88.6077148021002	88.5989904183397	88.454088218386	88.1383076947912	87.5739041636376	86.6001504105693	84.869993086924	81.5297294619401	73.8493767958858	45.4118475196645
88.5979994246586	88.5893128776843	88.4443629974161	88.1284010139267	87.5635894865436	86.5890290171865	84.8573176937005	81.5139063736327	73.8259640287393	45.3550778068618
88.5882976328312	88.5796487782783	88.4346510846537	88.1185075663894	87.5532881190765	86.5779213321506	84.8446570584621	81.4981004623095	73.8025741706873	45.2983423242526
88.5786094028934	88.5699980964635	88.4249524563832	88.1086273283055	87.5430000370557	86.566827330636	84.8320111549399	81.4823116984266	73.7792071845691	45.2416410161249
88.5689347111541	88.560360808617	88.415267088929	88.0987602758458	87.5327252163509	86.5557469878735	84.8193799569272	81.466540052512	73.7558630333143	45.1849738269108
88.5592735339558	88.5507368911518	88.4055949586551	88.0889063852259	87.5224636328823	86.5446802791498	84.8067634382798	81.4507854951656	73.7325416799426	45.1283407011864
88.5496258476746	88.5411263205165	88.3959360419651	88.0790656327064	87.5122152626201	86.533627179807	84.7941615729156	81.4350479970589	73.7092430875638	45.0717415836707
88.5399916287203	88.5315290731957	88.3862903153025	88.0692379945922	87.5019800815845	86.5225876652431	84.7815743348144	81.4193275289347	73.6859672193772	45.0151764192254
88.5303708535365	88.5219451257095	88.3766577551504	88.0594234472331	87.4917580658458	86.5115617109115	84.7690016980179	81.4036240616067	73.6627140386714	44.9586451528547
88.5207634986005	88.5123744546143	88.3670383380314	88.0496219670235	87.4815491915242	86.5005492923208	84.7564436366292	81.3879375659598	73.639483508824	44.9021477297043
88.5111695404233	88.5028170365019	88.3574320405082	88.0398335304021	87.4713534347895	86.4895503850348	84.7439001248127	81.3722680129492	73.6162755933012	44.8456840950611
88.50158895555	88.4932728480001	88.3478388391828	88.0300581138524	87.4611707718611	86.4785649646723	84.7313711367941	81.3566153736005	73.5930902556575	44.789254194353
88.4920217205596	88.4837418657729	88.3382587106971	88.0202956939022	87.4510011790082	86.467593006907	84.7188566468601	81.3409796190096	73.5699274595354	44.732857973148
88.4824678120649	88.4742240665199	88.3286916317326	88.0105462471234	87.4408446325494	86.4566344874672	84.7063566293581	81.3253607203423	73.5467871686654	44.6764953771541
88.4729272067129	88.4647194269771	88.3191375790103	88.0008097501327	87.4307011088525	86.4456893821359	84.6938710586961	81.3097586488337	73.523669346865	44.6201663522184
88.4633998811846	88.455227923916	88.3095965292911	87.9910861795907	87.4205705843346	86.4347576667504	84.6813999093426	81.2941733757889	73.5005739580391	44.5638708443272
88.4538858121952	88.4457495341445	88.3000684593753	87.9813755122023	87.410453035462	86.4238393172023	84.6689431558264	81.2786048725817	73.4775009661793	44.5076087996049
88.444384976494	88.4362842345064	88.2905533461031	87.9716777247168	87.4003484387502	86.4129343094374	84.6565007727362	81.2630531106552	73.4544503353639	44.451380164314
88.4348973508644	88.4268320018817	88.281051166354	87.9619927939273	87.3902567707633	86.4020426194555	84.6440727347205	81.247518061521	73.4314220297571	44.3951848848545
88.4254229121243	88.4173928131865	88.2715618970472	87.952320696671	87.3801780081147	86.3911642233102	84.6316590164878	81.2319996967594	73.4084160136093	44.3390229077634
88.4159616371256	88.4079666453728	88.2620855151418	87.9426614098292	87.3701121274661	86.3802990971087	84.6192595928058	81.2164979880189	73.3854322512563	44.2828941797142
88.4065135027548	88.3985534754289	88.2526219976359	87.9330149103272	87.3600591055282	86.369447217012	84.6068744385016	81.2010129070161	73.3624707071194	44.2267986475166
88.3970784859325	88.3891532803795	88.2431713215677	87.9233811751339	87.3500189190602	86.3586085592343	84.5945035284615	81.1855444255354	73.3395313457049	44.1707362581159
88.387656563614	88.379766037285	88.2337334640147	87.9137601812623	87.3399915448695	86.3477831000432	84.5821468376308	81.1700925154288	73.3166141316037	44.1147069585928
88.3782477127887	88.3703917232424	88.2243084020938	87.9041519057692	87.3299769598122	86.3369708157595	84.5698043410134	81.1546571486158	73.2937190294914	44.0587106961624
88.3688519104807	88.3610303153848	88.2148961129618	87.8945563257549	87.3199751407925	86.3261716827568	84.557476013672	81.1392382970829	73.2708460041275	44.0027474181744
88.3594691337488	88.3516817908815	88.2054965738146	87.8849734183634	87.3099860647628	86.3153856774617	84.5451618307275	81.1238359328837	73.2479950203556	43.9468170721124
88.3500993596859	88.3423461269381	88.1961097618879	87.8754031607826	87.3000097087234	86.3046127763536	84.5328617673592	81.1084500281384	73.2251660431027	43.8909196055932
88.3407425654197	88.3330233007964	88.1867356544566	87.8658455302435	87.2900460497229	86.2938529559643	84.5205757988045	81.0930805550338	73.2023590373793	43.8350549663669
88.3313987281127	88.3237132897346	88.1773742288354	87.856300504021	87.2800950648574	86.2831061928782	84.5083039003585	81.077727485823	73.1795739682786	43.7792231023159
88.3220678249618	88.3144160710672	88.1680254623781	87.8467680594332	87.2701567312711	86.2723724637319	84.4960460473743	81.0623907928251	73.1568108009771	43.7234239614549
88.3127498331986	88.3051316221448	88.158689332478	87.8372481738416	87.2602310261556	86.2616517452141	84.4838022152623	81.047070448425	73.1340695007331	43.6676574919302
88.3034447300896	88.2958599203547	88.1493658165681	87.8277408246512	87.2503179267503	86.2509440140659	84.4715723794904	81.0317664250735	73.1113500328876	43.6119236420196
88.2941524929358	88.2866009431202	88.1400548921203	87.81824598931	87.2404174103418	86.2402492470798	84.4593565155835	81.0164786952866	73.0886523628632	43.5562223601314
88.2848730990732	88.2773546679011	88.1307565366463	87.8087636453095	87.2305294542643	86.2295674211005	84.4471545991239	81.0012072316456	73.0659764561643	43.5005535948046
88.2756065258724	88.2681210721936	88.1214707276969	87.799293770184	87.2206540358993	86.218898513024	84.4349666057503	80.9859520067968	73.0433222783765	43.444917294708
88.2663527507389	88.2589001335301	88.1121974428622	87.7898363415113	87.2107911326754	86.208242499798	84.4227925111585	80.9707129934512	73.0206897951667	43.3893134086403
88.257111751113	88.2496918294795	88.1029366597717	87.7803913369119	87.2009407220682	86.1975993584215	84.4106322911004	80.9554901643846	72.9980789722824	43.3337418855291
88.2478835044701	88.2404961376473	88.0936883560943	87.7709587340495	87.1911027816003	86.1869690659446	84.3984859213847	80.940283492437	72.9754897755517	43.2782026744308
88.2386679883202	88.2313130356749	88.0844525095379	87.7615385106305	87.1812772888415	86.1763515994687	84.3863533778759	80.9250929505126	72.9529221708829	43.2226957245302
88.2294651802084	88.2221425012405	88.0752290978498	87.7521306444045	87.1714642214081	86.1657469361461	84.3742346364946	80.9099185115796	72.9303761242645	43.16722098514
88.2202750577146	88.2129845120587	88.0660180988164	87.7427351131635	87.161663556963	86.1551550531798	84.3621296732173	80.89476014867	72.9078516017646	43.1117784057005
88.2110975984539	88.2038390458802	88.0568194902636	87.7333518947425	87.151875273216	86.1445759278235	84.3500384640762	80.8796178348793	72.8853485695307	43.0563679357792
88.2019327800762	88.1947060804925	88.047633250056	87.7239809670191	87.1420993479233	86.1340095373817	84.337960985159	80.8644915433662	72.8628669937897	43.0009895250699
88.1927805802664	88.1855855937193	88.0384593560978	87.7146223079136	87.1323357588873	86.123455859209	84.3258972126085	80.8493812473529	72.8404068408472	42.9456431233933
88.1836409767446	88.1764775634208	88.029297786332	87.7052758953888	87.1225844839571	86.1129148707105	84.313847122623	80.8342869201241	72.8179680770876	42.8903286806957
88.1745139472658	88.1673819674935	88.0201485187408	87.69594170745	87.1128455010278	86.1023865493415	84.3018106914556	80.8192085350276	72.7955506689737	42.8350461470489
88.1653994696202	88.1582987838707	88.0110115313455	87.6866197221451	87.1031187880405	86.0918708726072	84.2897878954144	80.8041460654736	72.7731545830465	42.77979547265
88.1562975216328	88.1492279905217	88.0018868022065	87.677309917564	87.0934043229825	86.0813678180627	84.2777787108621	80.7890994849346	72.7507797859249	42.7245766078206
88.1472080811641	88.1401695654524	87.9927743094231	87.6680122718394	87.083702083887	86.070877363313	84.2657831142158	80.7740687669453	72.7284262443053	42.669389503007
88.1381311261093	88.1311234867053	87.9836740311336	87.658726763146	87.0740120488331	86.0603994860126	84.2538010819473	80.7590538851024	72.7060939249617	42.6142341087792
88.1290666343992	88.1220897323591	87.9745859455155	87.6494533697008	87.0643341959455	86.0499341638658	84.2418325905822	80.7440548130643	72.6837827947451	42.5591103758309
88.1200145839993	88.1130682805292	87.9655100307849	87.6401920697628	87.0546685033947	86.0394813746259	84.2298776167005	80.7290715245508	72.6614928205833	42.5040182549788
88.1109749529105	88.1040591093671	87.956446265197	87.6309428416334	87.0450149493965	86.0290410960957	84.2179361369358	80.7141039933433	72.639223969481	42.4489576971627
88.1019477191689	88.095062197061	87.9473946270459	87.6217056636556	87.0353735122125	86.0186133061271	84.2060081279756	80.6991521932843	72.616976208519	42.3939286534447
88.0929328608457	88.0860775218355	87.9383550946645	87.6124805142148	87.0257441701493	86.008197982621	84.1940935665608	80.6842160982771	72.5947495048544	42.338931075009
88.0839303560472	88.0771050619516	87.9293276464246	87.6032673717381	87.0161269015592	85.9977951035272	84.182192429486	80.669295682286	72.57254382572	42.2839649131613
88.0749401829152	88.0681447957066	87.9203122607367	87.5940662146943	87.0065216848392	85.9874046468442	84.1703046935987	80.6543909193357	72.5503591384245	42.2290301193289
88.0659623196264	88.0591967014343	87.9113089160501	87.5848770215942	86.9969284984316	85.9770265906191	84.1584303357997	80.6395017835114	72.5281954103517	42.1741266450598
88.0569967443929	88.0502607575052	87.9023175908529	87.5756997709903	86.9873473208239	85.9666609129477	84.1465693330428	80.6246282489586	72.5060526089608	42.1192544420227
88.048043435462	88.0413369423257	87.8933382636719	87.5665344414767	86.9777781305481	85.956307591974	84.1347216623343	80.6097702898826	72.4839307017856	42.0644134620065
88.0391023711164	88.032425234339	87.8843709130725	87.5573810116892	86.9682209061812	85.9459666058903	84.1228873007334	80.5949278805486	72.4618296564349	42.0096036569199
88.0301735296737	88.0235256120246	87.8754155176589	87.548239460305	86.958675626345	85.9356379329369	84.1110662253517	80.5801009952816	72.4397494405916	41.9548249787911
88.0212568894871	88.0146380538983	87.8664720560737	87.5391097660428	86.9491422697056	85.9253215514024	84.0992584133532	80.5652896084659	72.417690022013	41.9000773797674
88.012352428945	88.0057625385124	87.8575405069984	87.5299919076629	86.939620814974	85.9150174396231	84.0874638419538	80.550493694545	72.3956513685303	41.8453608121148
88.0034601264708	87.9968990444556	87.8486208491527	87.5208858639667	86.9301112409053	85.904725575983	84.0756824884216	80.5357132280216	72.3736334480482	41.7906752282177
87.9945799605236	87.9880475503528	87.8397130612951	87.5117916137971	86.9206135262992	85.8944459389138	84.0639143300768	80.5209481834574	72.351636228545	41.7360205805788
87.9857119095975	87.9792080348654	87.8308171222224	87.5027091360381	86.9111276499994	85.8841785068948	84.0521593442908	80.5061985354725	72.3296596780724	41.6813968218182
87.9768559522219	87.9703804766912	87.8219330107701	87.493638409615	86.9016535908939	85.8739232584526	84.040417508487	80.4914642587459	72.3077037647547	41.6268039046734
87.9680120669616	87.9615648545642	87.8130607058119	87.484579413494	86.8921913279146	85.8636801721611	84.0286888001401	80.4767453280148	72.2857684567894	41.5722417819989
87.9591802324166	87.9527611472548	87.8042001862599	87.4755321266826	86.8827408400377	85.8534492266414	84.0169731967759	80.4620417180744	72.2638537224461	41.5177104067659
87.9503604272224	87.9439693335697	87.7953514310647	87.466496528229	86.8733021062828	85.8432304005614	84.0052706759716	80.4473534037781	72.241959530067	41.4632097320619
87.9415526300495	87.9351893923521	87.7865144192151	87.4574725972227	86.8638751057137	85.8330236726362	83.9935812153551	80.4326803600371	72.2200858480663	41.4087397110902
87.9327568196038	87.9264213024811	87.7776891297383	87.4484603127937	86.8544598174376	85.8228290216277	83.9819047926053	80.4180225618202	72.1982326449298	41.35430029717
87.9239729746266	87.9176650428725	87.7688755416997	87.4394596541129	86.8450562206054	85.8126464263441	83.9702413854518	80.4033799841536	72.1763998892152	41.2998914437354
87.9152010738944	87.9089205924781	87.760073634203	87.4304706003921	86.8356642944115	85.8024758656404	83.9585909716745	80.3887526021209	72.1545875495515	41.2455131043358
87.906441096219	87.9001879302861	87.7512833863898	87.4214931308836	86.8262840180938	85.7923173184183	83.9469535291041	80.3741403908627	72.1327955946388	41.1911652326349
87.8976930204476	87.8914670353208	87.7425047774402	87.4125272248802	86.8169153709334	85.7821707636252	83.935329035621	80.3595433255765	72.1110239932481	41.1368477824109
87.8889568254625	87.8827578866429	87.7337377865723	87.4035728617157	86.8075583322545	85.7720361802553	83.9237174691562	80.3449613815167	72.0892727142212	41.0825607075557
87.8802324901815	87.8740604633493	87.7249823930421	87.3946300207639	86.7982128814248	85.7619135473484	83.9121188076903	80.3303945339941	72.0675417264703	41.0283039620749
87.8715199935574	87.865374744573	87.716238576144	87.3856986814391	86.7888789978549	85.7518028439906	83.900533029254	80.3158427583762	72.0458309989779	40.9740775000876
87.8628193145787	87.8567007094832	87.70750631521	87.3767788231963	86.779556660998	85.7417040493137	83.8889601119275	80.3013060300863	72.0241405007965	40.9198812758254
87.8541304322688	87.8480383372854	87.6987855896104	87.3678704255305	86.7702458503508	85.7316171424952	83.8774000338404	80.2867843246042	72.0024702010485	40.8657152436329
87.8454533256865	87.839387607221	87.6900763787532	87.3589734679768	86.7609465454522	85.7215421027582	83.865852773172	80.2722776174653	71.9808200689259	40.8115793579667
87.8367879739259	87.8307484985679	87.6813786620845	87.3500879301109	86.7516587258842	85.7114789093715	83.8543183081506	80.2577858842608	71.9591900736899	40.7574735733956
87.8281343561164	87.8221209906397	87.672692419088	87.3412137915483	86.7423823712712	85.7014275416489	83.8427966170537	80.2433091006375	71.9375801846711	40.7033978446
87.8194924514225	87.8135050627864	87.6640176292855	87.3323510319445	86.7331174612801	85.6913879789499	83.8312876782078	80.2288472422976	71.9159903712689	40.6493521263715
87.8108622390442	87.804900694394	87.6553542722364	87.3234996309952	86.7238639756203	85.6813602006787	83.8197914699881	80.2144002849984	71.8944206029515	40.5953363736129
87.8022436982165	87.7963078648846	87.6467023275378	87.3146595684358	86.7146218940434	85.671344186285	83.8083079708186	80.1999682045524	71.8728708492556	40.5413505413376
87.7936368082096	87.7877265537163	87.6380617748247	87.3058308240417	86.7053911963434	85.661339915263	83.7968371591718	80.1855509768269	71.8513410797862	40.4873945846693
87.7850415483293	87.7791567403832	87.6294325937696	87.2970133776281	86.6961718623563	85.651347367152	83.7853790135686	80.1711485777439	71.8298312642164	40.4334684588419
87.7764578979161	87.7705984044153	87.6208147640827	87.2882072090498	86.6869638719603	85.6413665215359	83.7739335125782	80.15676098328	71.8083413722873	40.3795721191991
87.7678858363462	87.762051525379	87.6122082655117	87.2794122982013	86.6777672050754	85.631397358043	83.7625006348179	80.1423881694661	71.7868713738075	40.3257055211941
87.7593253430306	87.7535160828761	87.6036130778419	87.2706286250167	86.6685818416637	85.6214398563464	83.7510803589531	80.1280301123875	71.7654212386531	40.2718686203889
87.7507763974157	87.7449920565448	87.5950291808962	87.2618561694698	86.6594077617289	85.6114939961633	83.7396726636969	80.1136867881834	71.7439909367676	40.2180613724548
87.7422389789831	87.7364794260591	87.5864565545347	87.2530949115736	86.6502449453165	85.6015597572552	83.7282775278103	80.099358173047	71.7225804381615	40.1642837331713
87.7337130672494	87.7279781711286	87.5778951786552	87.2443448313807	86.6410933725136	85.5916371194279	83.7168949301018	80.0850442432251	71.7011897129119	40.1105356584264
87.7251986417664	87.7194882714992	87.5693450331927	87.2356059089829	86.6319530234488	85.5817260625309	83.7055248494273	80.0707449750183	71.679818731163	40.0568171042158
87.7166956821211	87.7110097069525	87.5608060981196	87.2268781245114	86.6228238782922	85.5718265664579	83.6941672646903	80.0564603447805	71.658467463125	40.0031280266431
87.7082041679356	87.7025424573059	87.5522783534457	87.2181614581365	86.6137059172552	85.5619386111462	83.682822154841	80.0421903289188	71.6371358790747	39.949468381919
87.6997240788672	87.6940865024125	87.5437617792179	87.2094558900678	86.6045991205905	85.552062176577	83.6714894988772	80.0279349038935	71.6158239493546	39.8958381263614
87.6912553946082	87.6856418221613	87.5352563555204	87.2007614005539	86.595503468592	85.5421972427748	83.6601692758434	80.0136940462177	71.5945316443732	39.842237216395
87.6827980948859	87.6772083964773	87.5267620624746	87.1920779698824	86.5864189415946	85.5323437898077	83.6488614648308	79.9994677324575	71.5732589346048	39.7886656085507
87.6743521594628	87.6687862053207	87.5182788802389	87.1834055783798	86.5773455199743	85.5225017977873	83.6375660449773	79.9852559392315	71.5520057905888	39.735123259466
87.6659175681365	87.6603752286878	87.5098067890089	87.1747442064117	86.5682831841478	85.5126712468683	83.6262829954675	79.9710586432108	71.5307721829301	39.6816101258838
87.6574943007394	87.6519754466106	87.5013457690173	87.1660938343823	86.5592319145731	85.5028521172485	83.6150122955323	79.9568758211187	71.5095580822984	39.628126164653
87.6490823371393	87.6435868391565	87.4928958005336	87.1574544427347	86.5501916917484	85.4930443891688	83.6037539244489	79.9427074497308	71.4883634594284	39.5746713327276
87.6406816572386	87.6352093864288	87.4844568638645	87.1488260119507	86.5411624962129	85.483248042913	83.5925078615406	79.9285535058748	71.4671882851196	39.5212455871667
87.632292240975	87.6268430685662	87.4760289393534	87.1402085225507	86.5321443085463	85.4734630588078	83.5812740861767	79.9144139664301	71.4460325302355	39.4678488851341
87.6239140683211	87.6184878657431	87.4676120073808	87.1316019550937	86.5231371093687	85.4636894172226	83.5700525777725	79.9002888083277	71.4248961657042	39.4144811838982
87.6155471192843	87.6101437581695	87.4592060483639	87.1230062901771	86.5141408793407	85.4539270985692	83.558843315789	79.8861780085504	71.4037791625179	39.3611424408314
87.607191373907	87.6018107260907	87.4508110427567	87.1144215084369	86.5051555991631	85.4441760833021	83.5476462797329	79.8720815441323	71.3826814917324	39.3078326134101
87.5988468122667	87.5934887497877	87.4424269710498	87.1058475905473	86.4961812495771	85.4344363519182	83.5364614491563	79.8579993921586	71.3616031244674	39.2545516592143
87.5905134144756	87.585177809577	87.4340538137708	87.0972845172212	86.4872178113638	85.4247078849565	83.5252888036568	79.8439315297659	71.340544031906	39.2012995359275
87.5821911606809	87.5768778858103	87.4256915514838	87.0887322692092	86.4782652653446	85.4149906629983	83.5141283228771	79.8298779341415	71.3195041852946	39.1480762013361
87.5738800310646	87.568588958875	87.4173401647895	87.0801908273004	86.4693235923807	85.4052846666672	83.5029799865052	79.8158385825236	71.2984835559428	39.0948816133293
87.5655800058435	87.5603110091937	87.4089996343251	87.0716601723221	86.4603927733733	85.3955898766283	83.4918437742741	79.8018134522011	71.2774821152229	39.041715729899
87.5572910652694	87.5520440172244	87.4006699407644	87.0631402851395	86.4514727892632	85.3859062735888	83.4807196659616	79.7878025205132	71.2564998345701	38.9885785091393
87.5490131896286	87.5437879634605	87.3923510648177	87.0546311466558	86.4425636210312	85.3762338382978	83.4696076413903	79.7738057648497	71.2355366854822	38.9354699092462
87.5407463592424	87.5355428284306	87.3840429872318	87.0461327378122	86.4336652496975	85.3665725515458	83.4585076804274	79.7598231626505	71.2145926395192	38.8823898885176
87.5324905544669	87.5273085926986	87.3757456887897	87.0376450395877	86.424777656322	85.356922394165	83.4474197629847	79.7458546914055	71.1936676683034	38.8293384053528
87.5242457556928	87.5190852368636	87.3674591503108	87.0291680329991	86.415900822004	85.347283347029	83.4363438690184	79.7319003286546	71.1727617435191	38.7763154182524
87.5160119433455	87.5108727415599	87.3591833526509	87.0207016991011	86.4070347278821	85.3376553910527	83.4252799785287	79.7179600519876	71.1518748369122	38.7233208858176
87.5077890978853	87.5026710874571	87.3509182767019	87.0122460189857	86.3981793551342	85.3280385071924	83.4142280715605	79.7040338390436	71.1310069202905	38.6703547667508
87.4995771998068	87.4944802552599	87.342663903392	87.003800973783	86.3893346849777	85.3184326764454	83.4031881282021	79.6901216675116	71.1101579655232	38.6174170198545
87.4913762296396	87.4863002257079	87.3344202136855	86.9953665446602	86.3805006986687	85.30883787985	83.3921601285861	79.6762235151295	71.0893279445405	38.5645076040313
87.4831861679478	87.4781309795761	87.3261871885829	86.9869427128222	86.3716773775027	85.2992540984857	83.3811440528889	79.6623393596849	71.0685168293341	38.5116264782841
87.47500699533	87.4699724976743	87.3179648091206	86.9785294595112	86.3628647028138	85.2896813134723	83.3701398813304	79.6484691790139	71.0477245919562	38.4587736017151
87.4668386924195	87.4618247608474	87.3097530563712	86.970126766007	86.3540626559753	85.280119505971	83.359147594174	79.634612951002	71.02695120452	38.4059489335259
87.4586812398841	87.4536877499753	87.3015519114432	86.9617346136263	86.3452712183992	85.2705686571831	83.3481671717268	79.6207706535833	71.0061966391992	38.3531524330176
87.4505346184261	87.4455614459729	87.293361355481	86.9533529837234	86.3364903715361	85.2610287483507	83.3371985943391	79.6069422647404	70.9854608682277	38.3003840595899
87.4423988087823	87.4374458297898	87.2851813696648	86.9449818576895	86.3277200968753	85.2514997607563	83.3262418424042	79.5931277625047	70.9647438638999	38.2476437727412
87.4342737917241	87.4293408824108	87.2770119352107	86.9366212169529	86.3189603759447	85.2419816757226	83.3152968963587	79.5793271249557	70.94404559857	38.1949315320683
87.426159548057	87.4212465848553	87.2688530333706	86.928271042979	86.3102111903105	85.2324744746127	83.3043637366821	79.5655403302212	70.9233660446521	38.1422472972663
87.4180560586214	87.4131629181775	87.2607046454323	86.9199313172703	86.3014725215776	85.2229781388297	83.2934423438967	79.5517673564772	70.9027051746199	38.089591028128
87.4099633042917	87.4050898634667	87.2525667527189	86.9116020213659	86.2927443513887	85.2134926498168	83.2825326985676	79.5380081819475	70.8820629610068	38.0369626845441
87.4018812659769	87.3970274018465	87.2444393365894	86.9032831368418	86.2840266614252	85.204017989057	83.2716347813025	79.5242627849037	70.8614393764054	37.9843622265026
87.3938099246202	87.3889755144755	87.2363223784383	86.8949746453111	86.2753194334064	85.1945541380734	83.2607485727515	79.5105311436652	70.8408343934673	37.9317896140886
87.3857492611992	87.3809341825469	87.2282158596958	86.8866765284232	86.2666226490897	85.1851010784287	83.2498740536073	79.4968132365989	70.8202479849035	37.8792448074843
87.3776992567256	87.3729033872886	87.2201197618274	86.8783887678643	86.2579362902704	85.1756587917251	83.2390112046045	79.4831090421191	70.7996801234834	37.8267277669685
87.3696598922457	87.364883109963	87.212034066334	86.8701113453571	86.2492603387817	85.1662272596045	83.2281600065203	79.4694185386873	70.7791307820354	37.7742384529165
87.3616311488396	87.3568733318672	87.2039587547522	86.861844242661	86.2405947764947	85.1568064637482	83.2173204401736	79.4557417048123	70.758599933446	37.7217768258
87.353613007622	87.3488740343326	87.1958938086536	86.8535874415716	86.2319395853182	85.1473963858768	83.2064924864253	79.4420785190497	70.7380875506602	37.6693428461864
87.3456054497416	87.3408851987253	87.1878392096453	86.845340923921	86.2232947471986	85.1379970077504	83.1956761261783	79.4284289600021	70.7175936066813	37.616936474739
87.337608456381	87.3329068064459	87.1797949393696	86.8371046715777	86.2146602441199	85.1286083111678	83.184871340377	79.4147930063189	70.6971180745704	37.5645576722168
87.3296220087574	87.3249388389293	87.171760979504	86.8288786664464	86.2060360581036	85.1192302779672	83.1740781100074	79.4011706366959	70.6766609274465	37.5122063994737
87.3216460881217	87.3169812776448	87.1637373117612	86.8206628904677	86.1974221712085	85.1098628900256	83.163296416097	79.3875618298757	70.656222138486	37.4598826174592
87.3136806757589	87.309034104096	87.1557239178889	86.8124573256189	86.1888185655308	85.1005061292591	83.1525262397148	79.3739665646468	70.6358016809232	37.4075862872171
87.3057257529882	87.301097299821	87.14772077967	86.8042619539128	86.1802252232039	85.0911599776222	83.1417675619709	79.3603848198444	70.6153995280494	37.3553173698863
87.2978441786635	87.2932343611527	87.1397934525115	86.7961461093915	86.1717176054616	85.081909641502	83.1311217099305	79.3469474874051	70.5952144984973	37.3035864953288
87.2901926975417	87.2856036178883	87.1321053917442	86.7882826563889	86.1634838373301	85.0729675229854	83.1208412539156	79.3339808228695	70.5757422199791	37.2536686819193
87.2827702275945	87.2782039755976	87.1246554634	86.7806703881251	86.1555225929344	85.064332104374	83.1109243540553	79.3214823886766	70.5569789378291	37.2055567060335
87.2755756898133	87.2710343428475	87.1174425365576	86.7733081009517	86.1478325496166	85.0560018711604	83.1013691731282	79.3094497486598	70.5389209516979	37.1592431957913
87.2686080082089	87.264093631204	87.1104654833448	86.7661945943539	86.140412387936	85.0479753120225	83.0921738765758	79.297880470794	70.5215646009796	37.1147206569534
87.26186610981	87.2573807552339	87.10372317894	86.7593286709524	86.1332607916703	85.0402509188171	83.0833366326205	79.2867721289425	70.50490625468	37.0719814913996
87.2553489246634	87.2508946325067	87.0972145015741	86.7527091365046	86.1263764478154	85.032827186579	83.0748556124412	79.2761223039343	70.4889423043663	37.0310180104272
87.2490553858331	87.244634183596	87.0909383325316	86.7463347999067	86.1197580465856	85.0257026135247	83.0667289903747	79.265928584193	70.4736691592577	36.9918224444312
87.2429844293997	87.2385983320813	87.0848935561529	86.7402044731943	86.1134042814132	85.0188757010635	83.0589549441244	79.2561885660741	70.4590832428045	36.9543869500505
87.2371349944597	87.2327860045488	87.0790790598345	86.7343169715439	86.1073138489489	85.0123449538133	83.0515316549629	79.2468998540114	70.4451809903006	36.9187036155405
87.2315060231253	87.227196130593	87.073493734031	86.7286711132736	86.1014854490622	85.0061088796238	83.0444573079239	79.2380600605444	70.431958847217	36.8847644648968
87.2260964605234	87.2218276428174	87.0681364722562	86.7232657198442	86.0959177848423	85.0001659896023	83.0377300919782	79.2296668062722	70.4194132680351	36.8525614611031
87.2209052547955	87.2166794768355	87.0630061710831	86.7180996158592	86.0906095625997	84.9945147981449	83.0313482001932	79.2217177197662	70.4075407154305	36.822086508759
87.2159313570966	87.2117505712717	87.0581017301461	86.7131716290661	86.0855594918686	84.98915382297	83.0253098298762	79.2142104374599	70.3963376597002	36.7933314562702
87.2111737215946	87.2070398677619	87.0534220521403	86.7084805903564	86.08076628541	84.9840815851543	83.0196131827014	79.2071426035311	70.3858005783606	36.7662880977274
87.2066313054703	87.202546310954	87.0489660428232	86.7040253337661	86.0762286592149	84.9792966091708	83.0142564648219	79.2005118697824	70.3759259558653	36.740948174565
87.2021564203034	87.1981207143216	87.0445796752492	86.6996429474957	86.0717692900422	84.9745986422288	83.0090014815552	79.194010457482	70.3662461000517	36.7161080669868
87.1978954592377	87.1939109532441	87.0404156167995	86.6954948943592	86.0675639043244	84.9701860998494	83.0040841964952	79.1879432627506	70.3572245187508	36.6929611614427
87.1938473858009	87.1899159787296	87.0364727796814	86.6915800149837	86.0636112247875	84.9660575138118	82.9995028267655	79.1823079574598	70.3488576726969	36.6714991473962
87.1900111665346	87.1861347448015	87.0327500791681	86.6878971531449	86.0599099774146	84.9622114194561	82.995255594316	79.1771022186164	70.3411420403921	36.6517136465191
87.1863857709928	87.1825662084987	87.0292464335986	86.6844451557683	86.0564588914535	84.9586463557224	82.9913407258997	79.1723237290509	70.3340741146029	36.6335962197386
87.1829701717415	87.1792093298756	87.0259607643777	86.6812228729294	86.0532566994249	84.9553608651853	82.9877564530785	79.1679701778589	70.3276503999301	36.6171383724944
87.1797633443577	87.1760630720019	87.0228919959759	86.6782291578545	86.050302137131	84.9523534940873	82.9845010122467	79.164039260676	70.3218674111239	36.6023315587475
87.1767642674282	87.1731264009625	87.0200390559295	86.6754628669217	86.0475939436645	84.9496227923696	82.981572644664	79.1605286798402	70.3167216719179	36.589167184119
87.1739719225486	87.170398285857	87.0174008748399	86.6729228596617	86.045130861418	84.9471673137025	82.9789695964921	79.1574361444809	70.3122097142226	36.577636608422
87.1713852943223	87.1678776987991	87.0149763863736	86.6706079987587	86.0429116360933	84.9449856155149	82.9766901188334	79.1547593705595	70.3083280775693	36.5677311477688
87.1690033703592	87.1655636149164	87.012764527262	86.6685171500515	86.0409350167112	84.9430762590226	82.9747324677668	79.1524960808783	70.3050733087287	36.5594420763816
87.1668251412748	87.1634550123494	87.0107642373004	86.6666491825351	86.0391997556212	84.9414378092562	82.9730949043825	79.1506440050699	70.3024419614509	36.5527606281946
87.1648496006883	87.161550872251	87.0089744593478	86.6650029683614	86.0377046085116	84.9400688350885	82.9717756948136	79.149200879576	70.3004305962907	36.5476779983095
87.1630757452221	87.1598501787856	87.0073941393265	86.6635773828407	86.0364483344194	84.9389679092601	82.9707731102645	79.1481644476184	70.2990357804913	36.5441853443485
87.1615025744996	87.1583519191281	87.0060222262211	86.6623713044435	86.0354296957406	84.9381336084057	82.9700854270359	79.1475324591673	70.2982540879112	36.5422737877339
87.1601290911445	87.1570550834628	87.0048576720782	86.6613836148015	86.0346474582402	84.9375645130778	82.9697109265474	79.1473026709092	70.2980820989794	36.5419344149154
87.1589543007788	87.1559586649825	87.0038994320055	86.6606131987098	86.0341003910624	84.937259207771	82.9696478953567	79.1474728462141	70.2985164006715	36.5431582785607
87.1578407407193	87.1549238073067	87.0030041452904	86.6599084265637	86.0336234513821	84.9370313098833	82.9696746455231	79.1477565376786	70.2991216349313	36.5448242626824
87.1569246316601	87.154088108714	87.0023138662707	86.6594195323835	86.0333801395353	84.9370654272514	82.9700107267021	79.1484374436878	70.3003290668531	36.548042079168
87.1562049855795	87.1534505687903	87.0018275565444	86.6591454076612	86.0333692319038	84.9373601532025	82.9706544378397	79.1495133449637	70.3021352610237	36.5528027704227
87.1556808174522	87.1530101901278	87.001544180771	86.6590849470624	86.0335895082943	84.9379140851008	82.9716040830943	79.1509820268596	70.3045367993829	36.5590973298634
87.155351145248	87.1527659783238	87.0014627066706	86.659237048429	86.0340397519478	84.9387258243667	82.9728579717691	79.1528412800653	70.3075302779459	36.5669167086239
87.1552149899298	87.1527169419792	87.0015821050234	86.6596006127806	86.0347187495502	84.9397939764918	82.9744144182777	79.1550889010723	70.3111123045371	36.5762518205699
87.1552713754515	87.1528620926971	87.0019013496682	86.6601745443172	86.0356252912415	84.9411171510526	82.9762717421312	79.1577226924748	70.3152794972267	36.5870935461362
87.1555193287559	87.1532004450811	87.0024194175022	86.6609577504213	86.0367581706256	84.9426939617219	82.9784282679372	79.1607404631594	70.3200284832541	36.5994327353416
87.1559578797731	87.1537310167333	87.0031352884798	86.6619491416595	86.0381161847791	84.9445230262804	82.9808823254073	79.1641400284211	70.3253558982902	36.6132602102304
87.156586061418	87.1544528282533	87.0040479456115	86.6631476317855	86.0396981342606	84.9466029666269	82.9836322493674	79.1679192100282	70.331258385934	36.6285667669106
87.1574029095881	87.1553649032355	87.0051563749634	86.6645521377416	86.0415028231186	84.9489324087884	82.98667637977	79.1720758362554	70.3377325973739	36.645343177311
87.1584074631617	87.1564662682682	87.0064595656561	86.6661615796615	86.0435290589002	84.9515099829306	82.9900130617065	79.176607741895	70.3447751911615	36.6635801907375
87.1595987639951	87.1577559529308	87.0079565098632	86.6679748808719	86.0457756526588	84.9543343233668	82.9936406454185	79.1815127682545	70.3523828330647	36.683268535289
87.1609758569205	87.1592329897925	87.0096462028114	86.669990967895	86.0482414189617	84.9574040685677	82.9975574863078	79.1867887631459	70.3605521959767	36.7043989191718
87.1625377897438	87.1608964144097	87.0115276427784	86.6722087704504	86.0509251758973	84.9607178611701	83.0017619449455	79.1924335808706	70.3692799598627	36.7269620319414
87.1642836132417	87.1627452653245	87.0135998310926	86.6746272214576	86.0538257450825	84.9642743479859	83.0062523870785	79.1984450822008	70.3785628117332	36.7509485456906
87.1662123811597	87.1647785840622	87.0158617721317	86.6772452570374	86.0569419516694	84.9680721800102	83.0110271836356	79.2048211343606	70.3883974456374	36.7763491161982
87.168196264201	87.1668672464063	87.0181801555113	86.6799218818465	86.0601203355109	84.9719380698992	83.0158802487465	79.2112954940245	70.3983793450868	36.80212445039
87.1703619035563	87.1691391723126	87.0206870395276	86.6827967515184	86.0635128755306	84.9760436059249	83.0210156299432	79.2181317750777	70.4089090295361	36.8293017303131
87.1727083592979	87.1715934096822	87.0233814350731	86.6858688090445	86.067118404608	84.9803874485687	83.0264317105421	79.2253278612105	70.4199831746046	36.8578716387308
87.1752346944618	87.1742290093945	87.02626235609	86.68913700063	86.0709357591888	84.9849682625348	83.0321268790723	79.232881640716	70.4315984730002	36.8878248281319
87.1779399750447	87.1770450253049	87.0293288195683	86.6926002756959	86.0749637792897	84.9897847167569	83.0380995292047	79.2407910071469	70.4437516314974	36.9191519269629
87.1808232700011	87.1800405142425	87.0325798455454	86.6962575868808	86.0792013085049	84.9948354844014	83.0443480597124	79.2490538597495	70.4564393688512	36.9518435442903
87.1838836512409	87.1832145360076	87.0360144571045	86.7001078900425	86.0836471940104	85.0001192428689	83.0508708744508	79.2576681037462	70.4696584143606	36.9858902733673
87.1871201936257	87.1865661533697	87.0396316803736	86.7041501442597	86.0883002865694	85.0056346737951	83.0576663823511	79.2666316505139	70.4834055068829	37.0212826944342
87.1905319749665	87.1900944320644	87.0434305445245	86.7083833118334	86.0931594405365	85.0113804630512	83.064732997419	79.2759424176947	70.4976773941615	37.0580113769838
87.1941180760206	87.1937984407916	87.047410081771	86.7128063582889	86.0982235138615	85.0173553007443	83.0720691387391	79.2855983292587	70.5124708323691	37.0960668816479
87.1978775804884	87.1976772512127	87.0515693273685	86.7174182523764	86.1034913680937	85.0235578812175	83.0796732304796	79.2955973155371	70.5277825858038	37.1354397618187
87.2018095750103	87.2017299379478	87.055907319612	86.7222179660731	86.1089618683847	85.0299869030503	83.0875437018983	79.3059373132355	70.5436094266878	37.1761205650802
87.2059131491637	87.2059555785735	87.0604230998351	86.7272044745836	86.1146338834921	85.036641069059	83.0956789873471	79.316616265434	70.5599481350409	37.2180998345044
87.2101873954602	87.21035325362	87.0651157124087	86.7323767563416	86.1205062857817	85.0435190862971	83.1040775262766	79.3276321215798	70.576795498603	37.261368109849
87.2146314093415	87.2149220465686	87.0699842047396	86.7377337930104	86.1265779512303	85.0506196660555	83.1127377632387	79.3389828374748	70.5941483127923	37.3059159286832
87.2192442891772	87.2196610438488	87.0750276272689	86.7432745694843	86.1328477594282	85.0579415238631	83.1216581478889	79.3506663752617	70.6120033806884	37.3517338274596
87.223906704349	87.2244497073551	87.0801215376492	86.7488674764423	86.1391724782188	85.0653229431123	83.1306463919335	79.3624343936258	70.6299836632545	37.3978575008468
87.2287368482186	87.2294074219242	87.0853891781465	86.7546428385627	86.1456939210464	85.072924017597	83.1398928392152	79.3745327124596	70.6484623062527	37.4452388888183
87.2337338254248	87.2345332803208	87.0908296057359	86.7605996477527	86.1524109754918	85.0807434724874	83.149395951503	79.3869593099055	70.6674360989787	37.4938685854729
87.2388967435262	87.2398263782517	87.0964418804261	86.7667368991575	86.1593225327625	85.0887800372032	83.1591541956893	79.3997121687754	70.6869018475032	37.5437371711912
87.2442247129982	87.2452858143624	87.1022250652572	86.7730535911609	86.166427487694	85.0970324454136	83.1691660437222	79.4127892771472	70.7068563719312	37.5948352182632
87.2497168472294	87.2509106902344	87.1081782262995	86.7795487253856	86.173724738751	85.1054994350347	83.1794299725668	79.4261886287597	70.7272965045117	37.6471532950888
87.255372262518	87.2567001103822	87.1143004326515	86.7862213066929	86.1812131880281	85.1141797482251	83.1899444641844	79.439908223269	70.7482190883371	37.7006819693814
87.2611900780685	87.262653182251	87.1205907564387	86.7930703431833	86.1888917412505	85.1230721313813	83.2007080055225	79.4539460664115	70.7696209764527	37.755411810674
87.2671694159879	87.2687690162128	87.1270482728114	86.800094846196	86.196759307774	85.1321753351331	83.2117190885122	79.4683001701039	70.7914990312494	37.8113333923361
87.2733094012825	87.2750467255643	87.133672059943	86.8072938303088	86.2048148005852	85.1414881143385	83.2229762100686	79.4829685525015	70.8138501240535	37.8684372932445
87.2796091618539	87.2814854265234	87.1404611990284	86.8146663133377	86.213057136301	85.1510092280792	83.2344778720924	79.4979492380286	70.8366711348536	37.9267140992108
87.2860678284955	87.2880842382264	87.1474147742818	86.8222113163366	86.221485235168	85.1607374396559	83.2462225814727	79.5132402573905	70.8599589521223	37.9861544042324
87.2926845348892	87.2948422827245	87.1545318729348	86.8299278635966	86.2300980210614	85.1706715165843	83.2582088500887	79.5288396475748	70.8837104727031	38.0467488116191
87.299458417601	87.3017586849815	87.1618115852348	86.8378149826448	86.2388944214846	85.1808102305906	83.2704351948112	79.5447454518447	70.9079226017436	38.1084879350261
87.3063886160781	87.3088325728698	87.1692530044422	86.8458717042444	86.2478733675672	85.1911523576076	83.2829001375027	79.5609557197292	70.9325922526604	38.1713623994203
87.3134742726446	87.3160630771677	87.176855226829	86.8540970623929	86.2570337940637	85.2016966777705	83.2956022050167	79.5774685070098	70.9577163471255	38.2353628419937
87.3207145324979	87.3234493315562	87.1846173516763	86.8624900943212	86.2663746393522	85.2124419754132	83.308539929196	79.5942818757074	70.9832918150683	38.300479913037
87.3279986135111	87.3308794346098	87.1924238579173	86.8709286351094	86.2757629659762	85.2232381845741	83.3215349238334	79.6111655501728	71.0089694603853	38.3658267578755
87.3354362145431	87.3384641888867	87.2003891227407	86.8795336256879	86.2853303619916	85.234233830821	83.3347637284822	79.6283473978632	71.0350947142982	38.4322779840399
87.3430264869771	87.3462027343433	87.2085122519609	86.8883041103753	86.2950757738472	85.2454277080446	83.3482248867525	79.6458254964276	71.0616644981908	38.4998243260675
87.3507685850605	87.3540942138305	87.2167923543971	86.8972391367238	86.3049981516146	85.2568186143305	83.3619169472545	79.663597928278	71.0886757497494	38.5684565204006
87.3586616659011	87.3621377730905	87.2252285418718	86.9063377555175	86.3150964489852	85.2684053519553	83.3758384635354	79.6816627811168	71.1161254205585	38.6381653102468
87.3667048894633	87.3703325607529	87.2338199292076	86.9155990207708	86.3253696232682	85.2801867273799	83.3899879940424	79.7000181482857	71.1440104744424	38.7089414491908
87.3748974185637	87.378677728332	87.242565634225	86.925021989726	86.3358166353879	85.292161551243	83.4043641021011	79.7186621289934	71.1723278863259	38.7807757039324
87.3832384188677	87.3871724302229	87.2514647777396	86.9346057228521	86.3464364498805	85.3043286383523	83.4189653559041	79.7375928284611	71.2010746414532	38.8536588564141
87.391727058885	87.3958158236986	87.2605164835598	86.9443492838419	86.3572280348917	85.3166868076778	83.4337903285062	79.756808358011	71.2302477348567	38.9275817055183
87.4003625099659	87.4046070689058	87.2697198784836	86.9542517396102	86.3681903621727	85.3292348823426	83.4488375978216	79.7763068351201	71.2598441709983	39.0025350684612
87.4091439462971	87.4135453288618	87.2790740922962	86.9643121602915	86.3793224070767	85.3419716896167	83.4641057466238	79.796086383447	71.2898609635304	39.0785097819711
87.4180705448976	87.4226297694508	87.288578257767	86.9745296192372	86.3906231485559	85.3548960609086	83.4795933625456	79.8161451328449	71.3202951351399	39.1554967033116
87.4271414856148	87.4318595594207	87.2982315106467	86.984903193013	86.4020915691565	85.3680068317584	83.4952990380782	79.8364812193623	71.3511437174504	39.2334867111935
87.4363559511203	87.4412338703788	87.3080329896644	86.9954319613967	86.4137266550156	85.3813028418311	83.5112213705709	79.8570927852394	71.3824037509634	39.3124707066036
87.4457131269057	87.4507518767887	87.3179818365245	87.0061150073747	86.4255273958565	85.3947829349096	83.5273589622287	79.8779779788991	71.4140722850277	39.3924396135726
87.4552122012784	87.4604127559662	87.3280771959037	87.0169514171396	86.4374927849841	85.4084459588877	83.5437104201108	79.8991349549368	71.4461463778278	39.4733843798958
87.4648523653577	87.4702156880759	87.3383182154477	87.0279402800868	86.4496218192812	85.4222907657641	83.5602743561262	79.9205618741093	71.4786230963855	39.5552959778169
87.4745308582065	87.4800568758341	87.3485977460315	87.0389682954627	86.4617912253659	85.4361782294744	83.576885445024	79.9420454541889	71.5111795174787	39.6373615580509
87.4843494111881	87.4900390720506	87.359021849695	87.0501476018788	86.4741229975163	85.4502460174736	83.5937072607376	79.9637966817894	71.5441349469321	39.7203821783984
87.4943072215076	87.5001614630866	87.369589680577	87.0614772958014	86.4866161406162	85.4644929910955	83.6107384265631	79.9858137330607	71.5774864485771	39.8043489143041
87.5044034891714	87.5104232381423	87.3803003957784	87.0729564768922	86.4992696631157	85.4789180157656	83.6279775706558	80.0080947890327	71.6112311019583	39.8892528559919
87.514637416983	87.5208235892523	87.3911531553578	87.0845842480057	86.5120825770266	85.4935199609954	83.6454233259741	80.0306380360697	71.6453660002778	39.9750851125156
87.5250082105385	87.5313617112824	87.4021471223286	87.0963597151849	86.5250538979171	85.5082977003737	83.6630743302439	80.0534416661713	71.6798882489784	40.0618368147474
87.5355150782222	87.5420368019255	87.4132814626552	87.1082819876578	86.5381826449069	85.523250111558	83.6809292259388	80.0765038771687	71.7147949647698	40.1494991176259
87.5461572312025	87.5528480616973	87.4245553452495	87.1203501778334	86.551467840662	85.5383760762649	83.6989866602682	80.0998228728505	71.750083274961	40.2380632018836
87.5569338834271	87.5637946939327	87.435967941967	87.1325634012979	86.5649085113891	85.5536744802606	83.7172452851703	80.1233968630407	71.7857503170053	40.3275202754093
87.5678442516191	87.5748759047813	87.4475184276031	87.1449207768109	86.5785036868304	85.5691442133517	83.7357037573086	80.1472240636449	71.8217932381936	40.4178615743513
87.5788875552719	87.5860909032039	87.4592059798895	87.1574214263006	86.5922524002572	85.584784169376	83.7543607380701	80.1713026966747	71.858209195449	40.5090783640371
87.5900630166453	87.5974389009678	87.4710297794901	87.1700644748603	86.6061536884647	85.6005932461935	83.7732148935625	80.1956309902591	71.8949953551928	40.6011619397603
87.6013698607606	87.6089191126428	87.4829890099971	87.1828490507436	86.6202065917657	85.6165703456779	83.7922648946133	80.2202071786465	71.9321488932593	40.6941036274719
87.6128073153965	87.6205307555973	87.495082857927	87.1957742853604	86.6344101539845	85.6327143737079	83.8115094167668	80.2450295022012	71.9696669948446	40.7878947844004
87.6243746110842	87.6322730499935	87.5073105127167	87.2088393132717	86.6487634224505	85.649024240159	83.8309471402815	80.2700962073965	72.0075468544786	40.8825267996183
87.636070981103	87.6441452187836	87.5196711667188	87.2220432721858	86.6632654479925	85.6654988588954	83.8505767501263	80.2954055468065	72.0457856760137	40.9779910945687
87.647800715662	87.6560505888727	87.5320650308347	87.2352806547618	86.6778014548167	85.6820087249318	83.8702444119198	80.3207592019564	72.0840837205742	41.0735405501865
87.659658545032	87.6680848397986	87.5445908605738	87.2486558645528	86.6924850053455	85.698681959969	83.8901022960996	80.3463533018274	72.1227372647404	41.1699111604687
87.6716437084705	87.6802472006149	87.557247854703	87.2621680462471	86.7073151582495	85.7155174869319	83.9101490986648	80.3721861142508	72.1617435140696	41.2670944609235
87.6837554479714	87.6925369031534	87.5700352148941	87.2758163476672	86.7222909756807	85.7325142327169	83.9303835203361	80.3982559120565	72.2010996891786	41.3650820112608
87.6959930082604	87.7049531820192	87.5829521457198	87.2895999197649	86.7374115232662	85.7496711281837	83.9508042665063	80.4245609734574	72.2408030240182	41.4638653986839
87.7083556367898	87.7174952745866	87.5959978546489	87.3035179166162	86.7526758701014	85.7669871081466	83.9714100472089	80.4510995823031	72.2808507646835	41.5634362402986
87.7208425837345	87.7301624209945	87.6091715520416	87.317569495416	86.7680830887434	85.7844611113649	83.9921995770989	80.4778700282473	72.3212401685957	41.6637861849049
87.7334531019866	87.7429538641416	87.6224724511456	87.3317538164732	86.7836322552045	85.8020920805327	84.0131715754408	80.5048706068542	72.3619685039404	41.764906914356
87.7461864471508	87.7558688496821	87.6358997680906	87.346070043205	86.7993224489451	85.8198789622688	84.0343247661016	80.5320996196651	72.4030330492846	41.8667901446131
87.7590418775398	87.7689066260213	87.6494527218843	87.3605173421318	86.8151527528667	85.8378207071066	84.055657877546	80.5595553742379	72.4444310933172	41.9694276265841
87.772018654169	87.7820664443102	87.6631305344075	87.3750948828716	86.8311222533049	85.8559162694848	84.0771696428329	80.5872361841686	72.4861599346749	42.0728111468091
87.7851160407523	87.7953475584416	87.6769324304088	87.3898018381346	86.8472300400221	85.874164607737	84.0988587996126	80.6151403691007	72.5282168818278	42.1769325280351
87.7983333036964	87.8087492250449	87.6908576375006	87.4046373837175	86.8634752062004	85.8925646840832	84.1207240901238	80.6432662547276	72.5705992530051	42.2817836297106
87.8116697120968	87.8222707034814	87.7049053861534	87.4196006984978	86.8798568484341	85.91111546462	84.14276426119	80.6716121727893	72.6133043761502	42.3873563484206
87.8251245377322	87.8359112558396	87.7190749096912	87.4346909644282	86.8963740667224	85.929815919312	84.1649780642163	80.7001764610674	72.6563295888948	42.4936426182764
87.8386970550598	87.8496701469302	87.7333654442866	87.4499073665305	86.9130259644618	85.948665021983	84.1873642551847	80.7289574633771	72.6996722385462	42.6006344112712
87.8523865412102	87.8635466442815	87.7477762289553	87.4652490928899	86.9298116484384	85.967661750307	84.2099215946497	80.7579535295594	72.7433296820844	42.7083237376089
87.8661043529861	87.8774512146131	87.7622148508715	87.4806184468719	86.9466248593744	85.9866862422536	84.2325077672923	80.7869813484467	72.7870254543323	42.8160294606939
87.8799382066758	87.8914724512956	87.7767727457708	87.4961120827916	86.963570711764	86.0058570543844	84.2552635150876	80.8162221557166	72.8310327386099	42.9244224775047
87.8938873852566	87.9056096278317	87.7914491589544	87.5117291955536	86.9806483200007	86.0251731731149	84.2781876092858	80.8456743163289	72.875348898381	43.0334949174952
87.9079511743661	87.9198620204276	87.8062433385523	87.5274689831088	86.9978568018461	86.0446335886913	84.30127882572	80.8753362003506	72.9199713113627	43.1432389416762
87.9221288622969	87.9342289079877	87.8211545355178	87.5433306464479	87.0151952784223	86.0642372951828	84.3245359447627	80.9052061832667	72.9648973681499	43.2536467451243
87.9364197399916	87.9487095721096	87.8361820036226	87.5593133895951	87.0326628742042	86.083983290472	84.3479577512969	80.935282646187	73.0101244712659	43.3647105587944
87.9508231010378	87.9633032970794	87.8513249994508	87.5754164196023	87.0502587170121	86.1038705762457	84.3715430346985	80.9655639759821	73.0556500345076	43.4764226508475
87.9653382416625	87.9780093698658	87.8665827823939	87.5916389465423	87.0679819380041	86.1238981579837	84.3952905888236	80.9960485653714	73.1014714824967	43.588775327636
87.979964460727	87.9928270801156	87.8819546146452	87.6079801835026	87.0858316716679	86.1440650449497	84.4191992120005	81.0267348129784	73.1475862503714	43.701760934451
87.9947010597221	88.0077557201483	87.897439761194	87.6244393465788	87.1038070558133	86.1643702501803	84.4432677070238	81.057621123363	73.1939917835771	43.8153718560986
88.0095473427622	88.0227945849507	87.9130374898203	87.6410156548687	87.1219072315643	86.1848127904754	84.4674948811493	81.0887059070406	73.2406855377249	43.929600517356
88.0245026165804	88.0379429721716	87.928747071089	87.6577083304648	87.1401313433506	86.2053916863881	84.4918795460901	81.1199875804904	73.2876649784968	44.04443938334
88.0395661905233	88.0532001821168	87.9445677783444	87.6745165984486	87.1584785389003	86.2261059622157	84.516420518012	81.1514645661576	73.3349275815841	44.1598809598124
88.0547373765451	88.0685655177434	87.960498887704	87.6914396868834	87.1769479692311	86.2469546459895	84.5411166175295	81.1831352924516	73.3824708326473	44.2759177934382
88.0700154892032	88.0840382846548	87.9765396780533	87.7084768268079	87.1955387886427	86.2679367694659	84.565966669701	81.2149981937418	73.4302922272926	44.3925424720086
88.0853998456517	88.0996177910947	87.9926894310395	87.7256272522294	87.2142501547082	86.2890513681175	84.590969504024	81.2470517103514	73.4783892710581	44.5097476246365
88.100889765637	88.1153033479423	88.0089474310662	87.7428902001167	87.2330812282662	86.3102974811235	84.6161239544295	81.2792942885506	73.5267594794073	44.6275259219304
88.1164032135773	88.1310120979538	88.0252281623664	87.7601752769151	87.2519337127762	86.3315642623162	84.6412984763753	81.3115566523011	73.5751481585631	44.7452577084215
88.1320213498926	88.1468260112774	88.0416162192185	87.7775718940744	87.2709048266528	86.3529613277175	84.6666231296677	81.3440061172552	73.6238069138141	44.8635533980312
88.1477435000247	88.1627444046126	88.0581108921424	87.7950792951738	87.289993738069	86.3744877249228	84.6920967586173	81.3766411446854	73.6727332714525	44.9824057799279
88.1635689919925	88.1787665972782	88.0747114743965	87.812696726734	87.3091996184395	86.396142505214	84.7177182119803	81.4094602010661	73.7219247711473	45.1018076796463
88.1794971563862	88.1948919112062	88.0914172619719	87.8304234382099	87.3285216424118	86.4179247235514	84.7434863429208	81.442461758314	73.7713789649013	45.2217519608734
88.1955273263621	88.2111196709368	88.1082275535863	87.8482586819834	87.3479589878589	86.4398334385645	84.7694000089861	81.475644293949	73.8210934163311	45.342231526717
88.2116588376365	88.2274492036121	88.1251416506775	87.8662017133571	87.3675108358703	86.4618677125419	84.7954580720893	81.5090062912004	73.8710657001692	45.4632393206114
88.2278910284806	88.243879838971	88.1421588573975	87.8842517905464	87.3871763707446	86.4840266114219	84.8216593984971	81.5425462390759	73.9212934019209	45.5847683269692
88.2442232397144	88.260410909343	88.1592784806065	87.9024081746731	87.4069547799806	86.5063092047819	84.8480028588206	81.5762626324059	73.9717741176278	45.706811571655
88.2606548147015	88.277041749643	88.1764998298663	87.9206701297577	87.4268452542693	86.5287145658287	84.8744873280087	81.6101539718696	74.0225054537062	45.8293621223322
88.2771850993432	88.2937716973649	88.1938222174342	87.9390369227127	87.4468469874856	86.5512417713888	84.9011116853421	81.6442187640104	74.0734850268354	45.9524130887203
88.2938134420727	88.3106000925763	88.2112449582567	87.9575078233349	87.4669591766798	86.5738899018979	84.9278748144274	81.6784555212428	74.1247104638828	46.0759576227871
88.3105391938495	88.3275262779126	88.2287673699633	87.9760821042988	87.4871810220691	86.5966580413922	84.9547756031925	81.7128627618548	74.1761794018523	46.1999889188939
88.327361708154	88.3445495985708	88.2463887728597	87.9947590411487	87.5075117270294	86.6195452774984	84.9818129438809	81.7474390100065	74.2278894878504	46.3245002139053
88.344280340981	88.361669402304	88.2641084899221	88.0135379122919	87.5279504980865	86.6425507014247	85.0089857330468	81.7821827957266	74.2798383790632	46.4494847872736
88.3612944508346	88.3788850394154	88.2819258467901	88.0324179989908	87.5484965449077	86.6656734079516	85.0362928715491	81.8170926549078	74.3320237427419	46.574935961102
88.3744840550746	88.392230280035	88.2957363605182	88.0470505576074	87.5644181204017	86.6835891558727	85.0574478030513	81.8441336710501	74.3724396472048	46.6720588467534
88.3876650490563	88.4055663974453	88.3095365823954	88.0616708844708	87.5803245467414	86.701485476825	85.078576848995	81.8711379811257	74.4127949426249	46.7449216059104
88.4008376355565	88.4188936685814	88.323326926079	88.0762795959955	87.5962167040368	86.7193635493069	85.0996814396704	81.8981069687043	74.4520615510124	46.8059397145692
88.4140018072422	88.4322120858331	88.3371073838647	88.0908766848667	87.6120945863353	86.7372233706034	85.1207615801455	81.9250032667755	74.48989792734	46.8582468075642
88.427157556778	88.4455216416009	88.3508779480682	88.1054621438022	87.6279581877353	86.7550649381005	85.1418161444903	81.9517804203845	74.5261454159031	46.904008310102
88.4403048768269	88.4588223282961	88.3646386110257	88.1200359655519	87.6438075023869	86.7728882193484	85.1628426758193	81.9783903000717	74.5607584732532	46.9447377768832
88.4534437600503	88.4721141383402	88.3783893650931	88.1345981428989	87.6596425237683	86.7906931184642	85.1838374229339	82.0047873081833	74.5937595303796	46.9815076056718
88.4665741991088	88.4853970641658	88.3921302026473	88.1491486686421	87.6754632431829	86.8084794453165	85.2047955007438	82.0309305698392	74.625210014686	47.0150897185609
88.4796961866625	88.4986710982163	88.4058611160848	88.1636875355463	87.6912696475828	86.8262468905971	85.2257111053824	82.0567848811768	74.6551919416786	47.0460497562918
88.4928097153714	88.511936232946	88.419582097821	88.1782147362436	87.7070617168898	86.8439950078907	85.2465777429743	82.0823209124809	74.6837963953012	47.0748103730839
88.505914777896	88.5251924608201	88.4332931402863	88.1927302630776	87.7228394210093	86.8617232027082	85.267388448827	82.1075149838567	74.7111164763956	47.1016939591631
88.5190113668973	88.5384397743146	88.4469942359191	88.2072341078851	87.7386027167161	86.8794307278447	85.2881359849613	82.1323486137541	74.7372431305596	47.1269516388684
88.5320994750375	88.5516781659164	88.460685377154	88.2217262617155	87.7543515445716	86.89711668414	85.3088130107421	82.1568079644733	74.762262815123	47.15078308956
88.5451790949804	88.5649076281225	88.4743665564039	88.2362067144915	87.7700858260004	86.9147800256369	85.3294122254422	82.1808832596306	74.786256326229	47.1733502017339
88.5582502193915	88.5781281534393	88.4880377660356	88.2506754546156	87.7858054606223	86.9324195681583	85.3499264838867	82.20456821711	74.8092983446738	47.1947865903879
88.5713128409383	88.5913397343808	88.5016989983362	88.2651324685329	87.8015103239117	86.9500340004111	85.3703488875389	82.2278595211276	74.8314574152613	47.2152042977228
88.5843669522905	88.6045423634667	88.5153502454721	88.2795777402574	87.8172002652266	86.967621896837	85.3906728539155	82.2507563446388	74.8527961767367	47.2346985826461
88.5974125461205	88.6177360332191	88.5289914994378	88.2940112508726	87.8328751062323	86.985181731551	85.4108921673487	82.2732599257838	74.8733717262258	47.2533513971571
88.6104496151028	88.6309207361582	88.5426227519956	88.3084329780168	87.8485346397276	87.0027118928249	85.4310010139976	82.2953731976348	74.8932360456402	47.2712339532008
88.6234781519142	88.6440964647965	88.5562439946055	88.3228428953618	87.8641786288657	87.0202106976783	85.4509940037865	82.3171004680618	74.9124364457095	47.2884086526481
88.6364981492334	88.6572632116317	88.5698552183469	88.3372409720956	87.879806806754	87.0376764062362	85.4708661816552	82.3384471453148	74.9310160014484	47.3049305656394
88.6495095997404	88.6704209691381	88.5834564138297	88.351627172416	87.8954188764102	87.0551072355915	85.4906130302073	82.3594195044654	74.9490139644296	47.3208485840064
88.6625124961154	88.6835697297557	88.5970475710992	88.366001455044	87.9110145110448	87.0725013729811	85.5102304655479	82.3800244898387	74.9664661445111	47.3362063371784
88.6755068310379	88.6967094858775	88.6106286795315	88.3803637727623	87.926593354639	87.0898569881414	85.5297148278314	82.4002695488147	74.9834052581578	47.3510429314704
88.6884925971845	88.7098402298346	88.6241997277244	88.3947140719857	87.942155022784	87.1071722447539	85.5490628677921	82.4201624927488	74.9998612431923	47.3653935556782
88.7014697872272	88.7229619538796	88.6377607033804	88.4090522923671	87.9576991037492	87.1244453109324	85.5682717303193	82.4397113811932	75.0158615413539	47.3792899836479
88.7144383938304	88.7360746501674	88.6513115931869	88.423378366443	87.9732251597442	87.1416743687295	85.5873389359458	82.4589244260362	75.031431350868	47.3927609960574
88.7273984096476	88.7491783107332	88.6648523826921	88.4376922193209	87.9887327283442	87.1588576226678	85.6062623609622	82.4778099125965	75.0465938515921	47.4058327378016
88.7403498273177	88.7622729274694	88.6783830561778	88.4519937684112	88.0042213240471	87.1759933073145	85.6250402167298	82.4963761351007	75.0613704053972	47.4185290232709
88.7532926394599	88.7753584920992	88.6919035965321	88.4662829232042	88.0196904399344	87.193079693935	85.6436710286523	82.5146313443213	75.0757807343785	47.4308715988999
88.7662268386685	88.7884349961485	88.7054139851203	88.480559585092	88.0351395494098	87.2101150962683	85.6621536151659	82.5325837054663	75.089843079329	47.4428803702636
88.7791524175063	88.8015024309154	88.7189142016574	88.4948236472366	88.0505681079911	87.2270978754758	85.6804870670318	82.5502412646882	75.1035743407135	47.4545735994643
88.7920693684978	88.8145607874375	88.732404224082	88.5090749944822	88.0659755551335	87.2440264443161	85.6986707271443	82.5676119228153	75.1169902041653	47.4659680774097
88.8049776841206	88.8276100564581	88.7458840284326	88.523313503311	88.0813613160663	87.2608992706039	85.7167041710159	82.5847034151217	75.1301052523147	47.4770792747178
88.8178773567968	88.8406502283894	88.7593535887275	88.5375390418412	88.0967248036245	87.2777148800097	85.7345871880537	82.6015232961267	75.1429330645562	47.4879214743206
88.8307683788826	88.8536812932744	88.7728128768489	88.5517514698648	88.1120654200614	87.2944718582569	85.7523197637071	82.6180789285691	75.1554863061752	47.4985078883179
88.8436507426572	88.8667032407481	88.7862618624315	88.5659506389239	88.1273825588291	87.3111688527722	85.7699020625363	82.6343774758355	75.1677768080856	47.5088507612182
88.8565244403109	88.8797160599959	88.7997005127576	88.5801363924218	88.142675606316	87.327804573842	85.7873344122269	82.65042589723	75.1798156382757	47.5189614613731
88.8693894639317	88.8927197397119	88.8131287926577	88.5943085657686	88.1579439435315	87.3443777953265	85.8046172885597	82.6662309455721	75.1916131659299	47.5288505621368
88.8822458054912	88.9057142680559	88.8265466644178	88.6084669865567	88.1731869477323	87.3608873549789	85.8217513013281	82.6817991666898	75.2031791190698	47.5385279140625
88.8950934568295	88.9186996326095	88.839954087694	88.6226114747648	88.1884039939815	87.3773321544151	85.8387371811851	82.6971369004422	75.2145226364568	47.5480027092568
88.9079324096383	88.9316758203316	88.8533510194346	88.6367418429874	88.203594456638	87.3937111587762	85.8555757673939	82.7122502829688	75.2256523144081	47.5572835388603
88.9207626554444	88.9446428175133	88.8667374138094	88.6508578966874	88.218757710772	87.4100233961219	85.8722679964494	82.7271452499071	75.2365762490931	47.5663784444888
88.9335841855906	88.9576006097334	88.8801132221479	88.6649594344691	88.2338931335029	87.4262679565919	85.8888148915334	82.7418275403687	75.2473020748149	47.5752949643594
88.946396991217	88.9705491818126	88.8934783928842	88.6790462483693	88.2490001052605	87.4424439913666	85.9052175527643	82.7563027014929	75.2578369987131	47.5840401747263
88.9592010632406	88.9834885177688	88.9068328715116	88.6931181241634	88.264078010966	87.4585507114586	85.921477148199	82.7705760934328	75.268187832277	47.5926207271759
88.9719963923339	88.9964186007727	88.9201766005442	88.7071748416853	88.279126241135	87.4745873863612	85.9375949055462	82.7846528946507	75.2783610200082	47.6010428822538
88.9847829689034	89.0093394131031	88.9335095194871	88.721216175158	88.2941441929018	87.4905533425786	85.9535721045464	82.7985381074229	75.2883626655342	47.6093125398407
88.9975607830665	89.0222509361041	88.946831564815	88.7352418935328	88.3091312709661	87.5064479620607	85.9694100699801	82.8122365634709	75.2981985554364	47.61743526664
89.0103298246284	89.0351531501421	88.960142669958	88.7492517608356	88.3240868884648	87.5222706805613	85.9851101652595	82.8257529296523	75.3078741810266	47.6254163210963
89.0230900830573	89.0480460345644	88.9734427652963	88.7632455365182	88.3390104677693	87.5380209859387	86.0006737865685	82.839091713656	75.3173947582812	47.633260676022
89.0358415474604	89.0609295676588	88.9867317781614	88.7772229758122	88.3539014412114	87.553698416413	86.0161023575091	82.8522572696594	75.3267652461134	47.6409730391796
89.048584206558	89.0738037266145	89.0000096328459	88.7911838300848	88.36875925174	87.5693025587956	86.0313973242209	82.8652538039111	75.3359903631487	47.6485578720351
89.061318048658	89.0866684874843	89.0132762506192	88.8051278471949	88.3835833535116	87.5848330467022	86.0465601509373	82.8780853802128	75.3450746031478	47.6560194068719
89.0740430616294	89.0995238251488	89.0265315497513	88.8190547718468	88.3983732124161	87.6002895587602	86.061592315947	82.8907559252786	75.3540222492055	47.6633616624348
89.0867592328761	89.1123697132814	89.0397754455427	88.8329643459423	88.4131283065427	87.6156718168206	86.0764953079294	82.9032692339564	75.3628373868404	47.6705884582522
89.09946654931	89.125206124316	89.0530078503603	88.8468563089281	88.4278481265874	87.6309795841816	86.0912706226348	82.9156289742987	75.3715239160787	47.6777034277681
89.1121649973235	89.1380330294157	89.0662286736801	88.8607303981386	88.4425321762053	87.6462126638319	86.1059197598836	82.9278386924756	75.380085562623	47.6847100304008
89.1248545627631	89.1508503984442	89.0794378221349	88.8745863491328	88.457179972311	87.6613708967186	86.1204442208569	82.9399018175236	75.3885258881887	47.6916115626324
89.1375352309019	89.1636581999384	89.0926351995675	88.8884238960247	88.4717910453303	87.6764541600457	86.1348455056577	82.9518216659287	75.3968483000814	47.6984111682206
89.1502069864123	89.1764564010836	89.1058207070894	88.9022427718055	88.4863649394048	87.6914623656076	86.1491251111182	82.9636014460412	75.4050560600819	47.705111847617
89.1628698133394	89.1892449676903	89.1189942431433	88.9160427086588	88.5009012125546	87.7063954581593	86.1632845288345	82.9752442623237	75.4131522926974	47.7117164666627
89.1755236950738	89.2020238641738	89.1321557035709	88.9298234382661	88.5153994367988	87.7212534138289	86.1773252434086	82.9867531194337	75.4211399928344	47.7182277646291
89.188168614325	89.2147930535349	89.1453049816836	88.9435846921037	88.5298591982401	87.7360362385725	86.1912487308816	82.9981309261443	75.4290220329386	47.7246483616619
89.2008045530954	89.2275524973441	89.1584419683381	88.9573262017298	88.5442800971126	87.750743966674	86.2050564573401	83.0093804991043	75.4368011696494	47.7309807656808
89.2134314926542	89.2403021557263	89.171566552014	88.9710476990622	88.5586617477982	87.765376659291	86.2187498776823	83.0205045664449	75.444480050005	47.7372273787825
89.2260494135122	89.2530419873496	89.1846786188958	88.9847489166449	88.5730037788124	87.7799344030481	86.2323304345293	83.0315057712351	75.4520612172363	47.7433905031902
89.2386582953964	89.2657719494146	89.197778052956	88.9984295879053	88.5873058327625	87.7944173086774	86.2457995572691	83.0423866747908	75.459547116181	47.7494723467867
89.2512581172261	89.2784919976465	89.210864736042	89.0120894474006	88.6015675662801	87.8088255097069	86.2591586612213	83.0531497598444	75.4669400983481	47.7554750282668
89.2638488570891	89.2912020862899	89.2239385479642	89.025728231053	88.6157886499305	87.8231591611969	86.2724091469122	83.0637974335772	75.4742424266587	47.7614005819403
89.2764304922186	89.3039021681046	89.2369993665859	89.0393456763754	88.6299687681007	87.8374184385232	86.2855523994497	83.0743320305231	75.4814562798896	47.7672509622127
89.2890029989707	89.3165921943644	89.2500470679155	89.0529415226854	88.6441076188681	87.8516035362079	86.2985897879897	83.084755815345	75.4885837568387	47.7730280477715
89.3015663528036	89.3292721148576	89.2630815261985	89.0665155113095	88.6582049138513	87.8657146667964	86.3115226652847	83.0950709854926	75.4956268802371	47.7787336454984
89.3141205282559	89.3419418778891	89.2761026140119	89.0800673857761	88.6722603780455	87.8797520597801	86.3243523673082	83.1052796737439	75.5025876004217	47.7843694941313
89.3266654989278	89.3546014302856	89.2891102023584	89.0935968919988	88.6862737496439	87.8937159605631	86.337080212946	83.1153839506373	75.5094677987896	47.7899372676943
89.3392012374617	89.3672507174014	89.302104160761	89.1071037784484	88.7002447798457	87.9076066294737	86.3497075037504	83.1253858267978	75.5162692910474	47.7954385787122
89.3517277155242	89.3798896831269	89.3150843573589	89.1205877963163	88.7141732326536	87.9214243408176	86.3622355237487	83.1352872551621	75.5229938302699	47.8008749812273
89.3642449037895	89.3925182698988	89.328050659002	89.1340486996664	88.7280588846611	87.9351693819729	86.374665539303	83.1450901331086	75.5296431097838	47.8062479736322
89.3767527719233	89.4051364187119	89.3410029313462	89.1474862455782	88.7419015248313	87.9488420525258	86.3869987990143	83.1547963044942	75.5362187658848	47.8115590013317
89.389251288568	89.4177440691323	89.3539410389481	89.1609001942798	88.7557009542687	87.9624426634444	86.3992365336689	83.164407561604	75.5427223804024	47.8168094592468
89.4017404213285	89.4303411593132	89.3668648453591	89.1742903092727	88.7694569859836	87.9759715362916	86.4113799562195	83.1739256470181	75.5491554831211	47.8220006941711
89.4142201367603	89.4429276260111	89.3797742132186	89.187656357446	88.7831694446524	87.9894290024737	86.4234302618008	83.1833522553968	75.5555195540685	47.8271340069906
89.4266904003567	89.4555034046045	89.3926690043469	89.200998109183	88.7968381663733	88.0028154025245	86.4353886277734	83.1926890351916	75.5618160256773	47.832210654777
89.4391511765395	89.4680684291131	89.4055490798365	89.2143153384588	88.8104629984174	88.0161310854237	86.447256213795	83.2019375902826	75.5680462848322	47.8372318527608
89.4516024286486	89.4806226322197	89.4184143001427	89.2276078229296	88.8240437989792	88.0293764079483	86.4590341619138	83.2110994815468	75.5742116748059	47.8421987761948
89.4640441189344	89.4931659452914	89.4312645251724	89.2408753440146	88.837580436923	88.0425517340549	86.470723596684	83.220176228361	75.5803134970936	47.8471125621145
89.4764762085503	89.5056982984045	89.4440996143725	89.2541176869693	88.8510727915299	88.0556574342932	86.4823256252985	83.2291693100413	75.5863530131515	47.8519743110014
89.4888986575467	89.5182196203684	89.4569194268158	89.2673346409519	88.8645207522428	88.0686938852479	86.4938413377388	83.238080167223	75.5923314460452	47.8567850883566
89.5013114248666	89.5307298387519	89.4697238212856	89.2805259990828	88.8779242184124	88.0816614690095	86.5052718069387	83.2469102031835	75.5982499820139	47.86154592619
89.5137144683413	89.5432288799101	89.4825126563595	89.2936915584965	88.8912830990434	88.0945605726709	86.5166180889603	83.25566078511	75.6041097719547	47.8662578244304
89.5261077446882	89.5557166690122	89.4952857904899	89.3068311203876	88.9045973125412	88.1073915878506	86.5278812231815	83.2643332453163	75.6099119328334	47.8709217522623
89.5384912095094	89.5681931300705	89.5080430820844	89.31994449005	88.9178667864607	88.1201549102402	86.5390622324918	83.2729288824094	75.6156575490243	47.8755386493919
89.5508648172909	89.58065818597	89.5207843895831	89.3330314769107	88.9310914572569	88.1328509391752	86.5501621234977	83.2814489624091	75.6213476735846	47.8801094272503
89.5632285214039	89.5931117584989	89.5335095715345	89.3460918945568	88.9442712700368	88.1454800772289	86.5611818867329	83.2898947198226	75.6269833294668	47.8846349701332
89.5755822741066	89.6055537683795	89.5462184866695	89.3591255607582	88.9574061783153	88.1580427298276	86.572122496876	83.2982673586757	75.6325655106721	47.8891161362849
89.5879260265466	89.6179841353004	89.5589109939736	89.372132297484	88.9704961437722	88.1705393048862	86.5829849129719	83.306568053504	75.6380951833495	47.8935537589281
89.6002597287657	89.6304027779486	89.5715869527561	89.3851119309145	88.9835411360138	88.1829702124635	86.593770078657	83.3147979503035	75.6435732868423	47.8979486472421
89.6125833297043	89.6428096140425	89.5842462227188	89.3980642914483	88.9965411323367	88.1953358644368	86.6044789223879	83.3229581674451	75.6490007346856	47.9023015872943
89.6248967772079	89.6552045603654	89.5968886640212	89.4109892137052	89.0094961174954	88.2076366741938	86.6151123576717	83.3310497965527	75.6543784155582	47.9066133429263
89.6372000180339	89.6675875327992	89.6095141373448	89.4238865365241	89.0224060834739	88.2198730563415	86.6256712832985	83.339073903348	75.6597071941897	47.9108846565973
89.6494929978596	89.6799584463588	89.6221225039543	89.4367561029573	89.0352710292602	88.2320454264322	86.6361565835741	83.3470315284614	75.6649879122269	47.9151162501881
89.6617756612915	89.6923172152261	89.6347136257577	89.4495977602615	89.0480909606259	88.2441542007039	86.6465691285539	83.3549236882134	75.6702213890613	47.9193088257671
89.6740479518752	89.7046637527853	89.6472873653634	89.4624113598842	89.0608658899089	88.2561997958363	86.6569097742765	83.3627513753651	75.6754084226189	47.9234630663207
89.6863098121056	89.7169979716575	89.659843586136	89.4751967574474	89.0735958358005	88.2681826287206	86.6671793629962	83.3705155598408	75.6805497901156	47.9275796364498
89.6985611834397	89.7293197837361	89.6723821522495	89.487953812728	89.086280823137	88.2801031162426	86.6773787234156	83.3782171894237	75.6856462487793	47.9316591830355
89.7108020063081	89.7416291002217	89.6849029287388	89.500682389635	89.098920882695	88.2919616750784	86.6875086709167	83.3858571904251	75.6906985365402	47.9357023358734
89.7230322201292	89.7539258316575	89.6974057815489	89.5133823561841	89.1115160509913	88.3037587215029	86.6975700077896	83.3934364683287	75.6957073726917	47.9397097082806
89.7352517633226	89.7662098879648	89.7098905775822	89.5260535844697	89.1240663700874	88.3154946712089	86.7075635234609	83.4009559084121	75.7006734585229	47.9436818976753
89.7474605733248	89.7784811784783	89.7223571847442	89.5386959506341	89.1365718873978	88.3271699391378	86.7174899947191	83.4084163763445	75.7055974779245	47.9476194861305
89.7596585866044	89.7907396119808	89.734805471986	89.5513093348354	89.1490326555027	88.3387849393206	86.7273501859377	83.4158187187628	75.7104800979687	47.9515230409047
89.7718457386787	89.8029850967391	89.7472353093468	89.5638936212116	89.1614487319659	88.3503400847286	86.7371448492965	83.4231637638278	75.7153219694654	47.9553931149485
89.7840219641305	89.8152175405387	89.7596465679922	89.5764486978448	89.1738201791556	88.3618357871335	86.7468747249999	83.4304523217591	75.7201237274953	47.9592302473903
89.796187196626	89.8274368507185	89.7720391202529	89.5889744567218	89.1861470640708	88.3732724569769	86.7565405414927	83.4376851853516	75.724885991921	47.9630349640012
89.8083413689331	89.8396429342057	89.7844128396597	89.6014707936941	89.1984294581715	88.3846505032477	86.7661430156727	83.4448631304742	75.7296093678778	47.9668077776399
89.8204844129402	89.8518356975504	89.7967676009777	89.6139376084361	89.2106674372129	88.3959703333677	86.7756828531009	83.4519869165494	75.7342944462437	47.9705491886798
89.8326162596758	89.8640150469592	89.8091032802384	89.6263748044018	89.2228610810841	88.4072323530852	86.7851607482084	83.459057287018	75.738941804092	47.9742596854177
89.8447368393283	89.8761808883298	89.8214197547702	89.6387822887802	89.2350104736511	88.4184369663752	86.7945773845001	83.4660749697858	75.7435520051247	47.9779397444666
89.8568460812664	89.8883331272841	89.8337169032268	89.65115997245	89.2471157026036	88.4295845753474	86.8039334347555	83.4730406776565	75.7481256000897	47.9815898311315
89.8689439140604	89.9004716692017	89.8459946056145	89.6635077699325	89.2591768593063	88.4406755801596	86.8132295612263	83.4799551087483	75.7526631271814	47.9852103997709
89.8810302655029	89.912596419253	89.8582527433175	89.6758255993442	89.2711940386534	88.451710378938	86.8224664158307	83.4868189468973	75.7571651124254	47.9888018941435
89.8931050626315	89.924707282431	89.8704911991215	89.6881133823485	89.2831673389282	88.4626893677036	86.8316446403443	83.4936328620468	75.7616320700496	47.9923647477411
89.90516823175	89.9368041635846	89.8827098572361	89.7003710441062	89.2950968616655	88.4736129403033	86.8407648665883	83.5003975106234	75.7660645028396	47.9958993841085
89.9172196984513	89.948886967449	89.8949086033154	89.712598513226	89.3069827115186	88.484481488347	86.8498277166137	83.5071135359006	75.7704629024821	47.9994062171509
89.9292593876402	89.9609555986782	89.9070873244773	89.7247957217139	89.3188249961297	88.4952954011492	86.8588338028829	83.5137815683505	75.7748277498943	48.0028856514294
89.9412872235567	89.9730099618751	89.9192459093212	89.7369626049228	89.3306238260038	88.506055065676	86.8677837284477	83.5204022259832	75.7791595155419	48.0063380824452
89.9533031297985	89.9850499616221	89.9313842479445	89.7490991015007	89.3423793143869	88.5167608664954	86.8766780871242	83.5269761146763	75.7834586597447	48.009763896913
89.9653070293459	89.997075502511	89.9435022319574	89.7612051533396	89.3540915771467	88.5274131857334	86.8855174636641	83.5335038284919	75.7877256329715	48.0131634730238
89.9772988445841	90.0090864891723	89.9555997544968	89.7732807055238	89.3657607326581	88.5380124030327	86.8943024339238	83.5399859499849	75.791960876124	48.0165371806982
89.9892784973285	90.0210828263046	89.9676767102387	89.7853257062776	89.3773869016906	88.5485588955156	86.9030335650289	83.5464230505004	75.7961648208103	48.0198853818301
90.001245908848	90.0330644187022	89.9797329954093	89.7973401069136	89.3889702073004	88.5590530377513	86.9117114155368	83.5528156904617	75.8003378896092	48.0232084305212
90.0132009998895	90.0450311712837	89.9917685077952	89.8093238617805	89.4005107747248	88.5694952017254	86.9203365355956	83.5591644196498	75.8044804963241	48.0265066733074
90.0251436907023	90.0569829891189	90.003783146752	89.8212769282109	89.4120087312802	88.5798857568133	86.9289094670999	83.5654697774727	75.8085930462291	48.0297804493767
90.0370739010625	90.0689197774561	90.0157768132121	89.8331992664694	89.4234642062632	88.5902250697563	86.9374307438441	83.5717322932276	75.8126759363056	48.033030090779
90.0489915502976	90.0808414417478	90.0277494096914	89.8450908397005	89.4348773308544	88.600513504641	86.9459008916716	83.5779524863542	75.8167295554711	48.0362559226286
90.0608965573107	90.0927478876769	90.0397008402947	89.8569516138771	89.4462482380258	88.6107514228807	86.9543204286226	83.5841308666798	75.8207542847998	48.0394582632997
90.0727888406057	90.1046390211816	90.0516310107205	89.8687815577485	89.4575770624503	88.6209391832003	86.9626898650773	83.5902679346577	75.8247504977357	48.0426374246146
90.0846683183113	90.1165147484802	90.0635398282644	89.8805806427893	89.4688639404148	88.6310771416226	86.9710097038977	83.5963641815976	75.8287185602988	48.0457937120257
90.0965349082058	90.1283749760952	90.0754272018221	89.8923488431484	89.4801090097353	88.6411656514574	86.9792804405657	83.602420089889	75.832658831284	48.0489274247907
90.1083885277416	90.1402196108768	90.0872930418905	89.9040861355977	89.491312409675	88.651205063293	86.9875025633184	83.6084361332179	75.836571662453	48.0520388561423
90.1202290940693	90.1520485600257	90.0991372605695	89.9157924994823	89.5024742808656	88.661195724989	86.9956765532816	83.6144127767775	75.8404573987205	48.0551282934514
90.1320565240627	90.1638617311157	90.110959771561	89.9274679166697	89.5135947652298	88.6711379816715	87.0038028845992	83.6203504774714	75.844316378334	48.0581960183855
90.1438707343425	90.1756590321154	90.1227604901693	89.9391123715009	89.5246740059075	88.6810321757302	87.0118820245612	83.6262496841117	75.8481489330469	48.0612423070612
90.1556716413006	90.1874403714097	90.1345393332987	89.9507258507402	89.535712147184	88.6908786468165	87.0199144337282	83.6321108376109	75.8519553882874	48.0642674301919
90.1674591611242	90.1992056578203	90.1462962194516	89.9623083435271	89.54670933442	88.7006777318442	87.0279005660545	83.6379343711681	75.8557360633207	48.06727165323
90.1792332098197	90.2109548006258	90.1580310687257	89.9738598413274	89.557665713985	88.7104297649906	87.035840869007	83.6437207104498	75.8594912714062	48.0702552365054
90.1909937032361	90.2226877095816	90.1697438028099	89.9853803378858	89.5685814331918	88.7201350776998	87.0437357836833	83.6494702737653	75.8632213199503	48.0732184353584
90.2027405570889	90.2344042949389	90.1814343449808	89.9968698291778	89.5794566402338	88.7297939986869	87.0515857449266	83.655183472237	75.8669265106536	48.0761615002689
90.2144736869831	90.246104467463	90.1931026200969	90.0083283133634	89.590291484124	88.7394068539439	87.0593911814382	83.6608607099663	75.870607139654	48.0790846769811
90.2261930084368	90.2577881384513	90.2047485545938	90.0197557907407	89.6010861146369	88.7489739667459	87.0671525158881	83.6665023841938	75.8742634976644	48.0819882066246
90.2378984369034	90.2694552197512	90.216372076478	90.0311522636995	89.6118406822508	88.7584956576591	87.0748701650226	83.6721088854557	75.8778958701075	48.0848723258308
90.2495898877951	90.2811056237762	90.22797311532	90.0425177366768	89.6225553380936	88.76797224455	87.0825445397709	83.6776805977356	75.8815045372453	48.0877372668467
90.2612672765048	90.2927392635228	90.2395516022479	90.0538522161116	89.6332302338895	88.7774040425944	87.0901760453483	83.6832178986115	75.8850897743047	48.090583257644
90.2729305184284	90.3043560525864	90.251107469939	90.065155710401	89.6438655219083	88.7867913642886	87.0977650813578	83.6887211593998	75.8886518516002	48.0934105220258
90.284579528987	90.315955905176	90.2626406526125	90.0764282298565	89.6544613549151	88.7961345194608	87.1053120418898	83.6941907452938	75.8921910346514	48.0962192797289
90.2962142236482	90.3275387361298	90.2741510860206	90.0876697866612	89.6650178861235	88.8054338152831	87.1128173156193	83.6996270154996	75.8957075842984	48.0990097465239
90.3078345179479	90.3391044609289	90.2856387074397	90.0988803948274	89.6755352691489	88.8146895562845	87.1202812859017	83.7050303233677	75.8992017568126	48.1017821343118
90.319440327511	90.3506529957111	90.2971034556616	90.1100600701549	89.6860136579646	88.8239020443647	87.127704330866	83.7104010165211	75.9026738040049	48.1045366512175
90.3310315680726	90.3621842572847	90.308545270983	90.1212088301897	89.6964532068582	88.8330715788082	87.1350868235063	83.7157394369794	75.9061239733302	48.1072735016806
90.3426081554984	90.3736981631405	90.3199640951963	90.1323266941837	89.7068540703909	88.8421984562989	87.142429131772	83.7210459212809	75.9095525079895	48.1099928865437
90.3541700058045	90.3851946314647	90.3313598715788	90.1434136830544	89.7172164033574	88.8512829709358	87.1497316186551	83.7263208005996	75.9129596470282	48.1126950031376
90.3657170351782	90.3966735811507	90.3427325448825	90.1544698193462	89.7275403607473	88.8603254142485	87.1569946422766	83.7315644008604	75.9163456254319	48.1153800453641
90.3772491599968	90.4081349318101	90.3540820613227	90.1654951271911	89.7378260977078	88.8693260752136	87.1642185559709	83.7367770428507	75.9197106742195	48.1180482037768
90.388766296847	90.4195786037836	90.3654083685675	90.176489632271	89.7480737695086	88.8782852402714	87.1714037083683	83.7419590423291	75.9230550205339	48.1206996656587
90.4002683625442	90.431004518152	90.3767114157255	90.1874533617798	89.7582835315067	88.8872031933427	87.1785504434755	83.7471107101313	75.9263788877292	48.1233346150984
90.4117552741506	90.4424125967455	90.387991153335	90.1983863443873	89.7684555391139	88.8960802158468	87.1856591007559	83.7522323522728	75.929682495456	48.1259532330633
90.4232269489939	90.4538027621536	90.3992475333515	90.2092886102021	89.7785899477641	88.9049165867184	87.1927300152063	83.7573242700499	75.932966059745	48.1285556974711
90.4346833046849	90.465174937734	90.410480509136	90.2201601907366	89.7886869128831	88.9137125824263	87.1997635174335	83.7623867601367	75.9362297930865	48.1311421832593
90.4461242591353	90.4765290476215	90.4216900354425	90.2310011188715	89.7987465898587	88.9224684769912	87.2067599337287	83.7674201146807	75.9394739045094	48.1337128624526
90.4575497305747	90.4878650167362	90.4328760684054	90.2418114288218	89.8087691340121	88.9311845420044	87.2137195861408	83.7724246213958	75.942698599657	48.1362679042281
90.4689596375677	90.4991827707912	90.4440385655276	90.2525911561026	89.8187547005707	88.9398610466467	87.2206427925477	83.7774005636519	75.9459040808611	48.1388074749793
90.4803538990302	90.5104822362999	90.4551774856668	90.2633403374961	89.8287034446413	88.9484982577069	87.2275298667265	83.7823482205638	75.9490905472138	48.1413317383777
90.4917324342458	90.5217633405837	90.4662927890234	90.2740590110189	89.8386155211852	88.9570964396008	87.2343811184226	83.7872678670766	75.9522581946377	48.1438408554329
90.5030951628816	90.5330260117778	90.4773844371269	90.2847472158898	89.8484910849931	88.9656558543911	87.2411968534167	83.7921597740493	75.9554072159539	48.1463349845511
90.5144420050032	90.5442701788381	90.4884523928232	90.2954049924985	89.8583302906625	88.9741767618059	87.2479773735908	83.7970242083366	75.9585378009484	48.1488142815921
90.5257728810908	90.5554957715468	90.4994966202612	90.3060323823748	89.8681332925743	88.9826594192584	87.2547229769932	83.8018614328684	75.9616501364361	48.1512788999243
90.5370877120527	90.5667027205179	90.5105170848797	90.3166294281579	89.8779002448716	88.9911040818667	87.261433957902	83.8066717067273	75.9647444063243	48.1537289904784
90.5483864192408	90.5778909572025	90.5215137533936	90.3271961735668	89.8876313014389	88.9995110024729	87.2681106068867	83.811455285224	75.9678207916731	48.1561647018001
90.559668924464	90.5890604138937	90.532486593781	90.3377326633713	89.8973266158819	89.0078804316633	87.2747532108697	83.8162124199715	75.9708794707553	48.1585861801005
90.5709351500022	90.6002110237308	90.5434355752694	90.3482389433631	89.9069863415085	89.0162126177874	87.2813620531859	83.8209433589568	75.973920619114	48.1609935693062
90.5821850186192	90.6113427207035	90.5543606683221	90.3587150603279	89.9166106313105	89.0245078069781	87.2879374136411	83.8256483466112	75.9769444096195	48.1633870111068
90.5934184535763	90.6224554396561	90.565261844625	90.3691610620176	89.9261996379456	89.0327662431713	87.2944795685696	83.8303276238785	75.9799510125236	48.1657666450025
90.6046353786445	90.6335491162902	90.5761390770725	90.3795769971233	89.935753513721	89.0409881681254	87.3009887908903	83.8349814282825	75.9829405955134	48.1681326083492
90.6158357181169	90.6446236871688	90.5869923397544	90.3899629152491	89.945272410577	89.0491738214414	87.3074653501622	83.8396099939917	75.9859133237637	48.1704850364035
90.6270193968205	90.6556790897185	90.5978216079421	90.4003188668857	89.9547564800715	89.0573234405822	87.313909512638	83.844213551883	75.9888693599874	48.1728240623657
90.638186340128	90.6667152622322	90.6086268580746	90.4106449033853	89.964205873365	89.0654372608925	87.3203215413179	83.8487923296044	75.9918088644851	48.1751498174219
90.6493364739691	90.6777321438715	90.6194080677455	90.4209410769364	89.9736207412068	89.0735155156183	87.3267016960007	83.8533465516349	75.9947319951935	48.1774624307856
90.6604697248408	90.6887296746687	90.6301652156889	90.4312074405394	89.983001233921	89.0815584359264	87.3330502333357	83.8578764393446	75.9976389077325	48.1797620297372
90.6715860198188	90.6997077955284	90.6408982817662	90.4414440479827	89.9923475013942	89.0895662509242	87.3393674068721	83.8623822110518	76.0005297554508	48.1820487396635
90.6826852865671	90.7106664482289	90.6516072469523	90.4516509538191	90.0016596930622	89.0975391876786	87.3456534671085	83.8668640820801	76.0034046894706	48.1843226840953
90.6937674533482	90.7216055754237	90.6622920933218	90.461828213343	90.0109379578989	89.1054774712362	87.3519086615408	83.8713222648135	76.0062638587317	48.1865839847448
90.7048324490323	90.7325251206418	90.6729528040363	90.4719758825675	90.0201824444049	89.1133813246415	87.3581332347095	83.8757569687502	76.0091074100334	48.1888327615416
90.7158802031069	90.743425028289	90.68358936333	90.4820940182029	90.0293933005965	89.1212509689571	87.3643274282459	83.8801684005553	76.0119354880766	48.1910691326679
90.7269106456857	90.754305243648	90.694201756497	90.4921826776346	90.0385706739956	89.1290866232822	87.3704914809176	83.8845567641125	76.0147482355039	48.1932932145932
90.7379237075167	90.7651657128786	90.7047899698776	90.502241918902	90.0477147116202	89.136888504772	87.3766256286732	83.8889222605741	76.017545792939	48.1955051221072
90.7489193199912	90.7760063830177	90.715353990845	90.5122718006781	90.0568255599747	89.1446568286561	87.3827301046859	83.8932650884104	76.0203282990257	48.1977049683532
90.7598974151509	90.7868272019791	90.7258938077922	90.5222723822489	90.0659033650415	89.1523918082579	87.3888051393963	83.897585443458	76.0230958904652	48.1998928648593
90.7708579256963	90.7976281185529	90.7364094101186	90.5322437234938	90.0749482722724	89.160093655013	87.3948509605546	83.9018835189661	76.0258487020528	48.20206892157
90.7818007849934	90.8084090824047	90.746900788217	90.5421858848661	90.0839604265807	89.1677625784874	87.4008677932619	83.9061595056431	76.0285868667139	48.2042332468764
90.7927259270813	90.819170044075	90.7573679334609	90.5520989273736	90.0929399723337	89.1753987863968	87.4068558600108	83.9104135917013	76.0313105155389	48.2063859476457
90.8036332866783	90.8299109549777	90.7678108381907	90.5619829125608	90.1018870533458	89.1830024846243	87.412815380725	83.9146459629005	76.0340197778175	48.2085271292505
90.8145227991888	90.8406317673992	90.7782294957017	90.57183790249	90.1108018128714	89.1905738772385	87.4187465727985	83.9188568025916	76.036714781072	48.2106568955964
90.8253944007095	90.8513324344966	90.7886239002306	90.5816639597238	90.1196843935988	89.1981131665123	87.4246496511337	83.9230462917579	76.0393956510897	48.2127753491501
90.8362480280346	90.8620129102961	90.7989940469432	90.5914611473077	90.1285349376443	89.2056205529399	87.4305248281794	83.9272146090567	76.042062511955	48.214882590966
90.847083618662	90.8726731496912	90.8093399319217	90.6012295287527	90.1373535865464	89.2130962352556	87.4363723139671	83.9313619308592	76.0447154860805	48.2169787207127
90.8579011107983	90.8833131084407	90.8196615521519	90.6109691680194	90.1461404812605	89.2205404104505	87.4421923161479	83.93548843129	76.0473546942373	48.2190638366985
90.8687004433641	90.8939327431664	90.829958905511	90.6206801295009	90.154895762154	89.2279532737908	87.4479850400274	83.9395942822655	76.0499802555845	48.2211380358962
90.8794815559982	90.9045320113508	90.8402319907551	90.6303624780072	90.1636195690019	89.2353350188346	87.4537506886012	83.9436796535314	76.0525922876987	48.2232014139682
90.8902443890624	90.9151108713344	90.8504808075069	90.6400162787499	90.1723120409818	89.2426858374498	87.4594894625889	83.9477447126999	76.0551909066019	48.2252540652897
90.9009888836459	90.9256692823136	90.8607053562437	90.6496415973263	90.1809733166706	89.2500059198305	87.4652015604676	83.9517896252852	76.0577762267894	48.2272960829728
90.9117149815689	90.9362072043371	90.8709056382851	90.6592384997051	90.1896035340403	89.2572954545146	87.4708871785054	83.9558145547395	76.0603483612569	48.2293275588886
90.9224226253864	90.9467245983037	90.8810816557813	90.6688070522118	90.1982028304546	89.2645546284	87.4765465107933	83.9598196624867	76.062907421527	48.2313485836899
90.9331117583917	90.9572214259585	90.8912334117009	90.678347321514	90.2067713426658	89.271783626762	87.4821797492775	83.9638051079572	76.0654535176752	48.233359246833
90.9437823246195	90.9676976498904	90.9013609098193	90.687859374608	90.2153092068117	89.278982633269	87.4877870837906	83.96777104862	76.0679867583549	48.235359636599
90.9544342688492	90.9781532335281	90.911464154707	90.6973432788049	90.2238165584128	89.2861518299995	87.4933687020821	83.971717640016	76.0705072508225	48.2373498401144
90.965067536607	90.9885881411371	90.9215431517182	90.7067991017175	90.2322935323702	89.2932913974581	87.4989247898487	83.9756450357889	76.0730151009615	48.2393299433717
90.975682074169	90.999002337816	90.9315979069789	90.7162269112473	90.2407402629629	89.3004015145917	87.5044555307644	83.9795533877173	76.0755104133062	48.2413000312494
90.9862778285631	91.0093957894924	90.9416284273762	90.7256267755717	90.2491568838461	89.3074823588051	87.5099611065088	83.983442845744	76.0779932910647	48.243260187531
90.9968547475714	91.0197684629197	90.9516347205464	90.7349987631318	90.2575435280492	89.3145341059771	87.5154416967963	83.9873135580069	76.0804638361422	48.2452104949248
91.0074127797314	91.0301203256729	90.9616167948643	90.74434294262	90.2659003279743	89.3215569304761	87.520897479404	83.9911656708675	76.0829221491624	48.2471510350817
91.0179518743385	91.0404513461445	90.9715746594322	90.7536593829687	90.2742274153947	89.3285510051753	87.5263286301994	83.9949993289398	76.0853683294896	48.2490818886141
91.0284719814464	91.0507614935404	90.9815083240685	90.7629481533382	90.2825249214539	89.3355165014684	87.5317353231676	83.9988146751182	76.0878024752502	48.2510031351132
91.0389730518693	91.0610507378758	90.9914177992974	90.7722093231057	90.2907929766642	89.3424535892846	87.5371177304374	84.0026118506053	76.090224683353	48.2529148531669
91.0494550371821	91.0713190499709	91.0013030963381	90.7814429618545	90.2990317109063	89.3493624371037	87.5424760223085	84.0063909949385	76.0926350495098	48.2548171203765
91.0599178897215	91.0815664014465	91.011164227094	90.7906491393627	90.3072412534283	89.3562432119707	87.5478103672761	84.0101522460164	76.0950336682554	48.2567100133736
91.0703615625868	91.0917927647192	91.0210012041425	90.7998279255933	90.3154217328452	89.3630960795109	87.5531209320572	84.0138957401251	76.0974206329671	48.2585936078365
91.0807860096402	91.1019981129974	91.0308140407244	90.8089793906837	90.3235732771388	89.3699212039443	87.5584078816147	84.0176216119628	76.0997960358837	48.2604679785059
91.0911911855067	91.1121824202765	91.0406027507338	90.8181036049354	90.3316960136571	89.3767187481002	87.5636713791822	84.0213299946654	76.1021599681242	48.2623331992007
91.1015770455746	91.1223456613337	91.050367348708	90.827200638805	90.3397900691147	89.3834888734313	87.5689115862879	84.0250210198304	76.1045125197062	48.2641893428338
91.1119435459953	91.132487811724	91.0601078498172	90.8362705628938	90.3478555695927	89.3902317400277	87.5741286627784	84.028694817541	76.106853779564	48.2660364814261
91.1222906436829	91.1426088477749	91.0698242698549	90.8453134479393	90.3558926405386	89.3969475066315	87.5793227668416	84.0323515163894	76.1091838355658	48.2678746861223
91.1326182963137	91.1527087465817	91.079516625228	90.8543293648055	90.3639014067673	89.40363633065	87.5844940550296	84.0359912434999	76.1115027745313	48.2697040272044
91.1429264623256	91.1627874860021	91.0891849329469	90.8633183844745	90.3718819924612	89.4102983681697	87.5896426822811	84.0396141245512	76.1138106822483	48.2715245741062
91.1532151009176	91.172845044652	91.0988292106161	90.8722805780374	90.3798345211706	89.41693377397	87.5947688019437	84.0432202837988	76.1161076434893	48.2733363954274
91.1634841720486	91.1828814018998	91.1084494764249	90.8812160166866	90.387759115815	89.4235427015362	87.5998725657951	84.0468098440963	76.1183937420278	48.2751395589464
91.1737336364362	91.1928965378614	91.1180457491373	90.8901247717067	90.3956558986835	89.4301253030734	87.6049541240647	84.0503829269172	76.1206690606542	48.2769341316341
91.1839634555558	91.2028904333951	91.1276180480838	90.8990069144673	90.4035249914358	89.4366817295191	87.6100136254548	84.0539396523751	76.1229336811909	48.2787201796667
91.1941735916389	91.2128630700964	91.1371663931514	90.9078625164146	90.4113665151035	89.4432121305563	87.6150512171603	84.0574801392445	76.1251876845082	48.2804977684383
91.204364007672	91.2228144302929	91.1466908047749	90.9166916490641	90.419180590091	89.4497166546268	87.6200670448902	84.0610045049809	76.1274311505389	48.2822669625737
91.2145346673944	91.2327444970386	91.1561913039278	90.925494383993	90.4269673361768	89.4561954489432	87.6250612528865	84.0645128657403	76.1296641582927	48.2840278259402
91.224685535297	91.2426532541089	91.1656679121137	90.9342707928332	90.4347268725149	89.4626486595022	87.6300339839441	84.0680053363989	76.1318867858712	48.2857804216597
91.2348165766197	91.2525406859951	91.1751206513573	90.9430209472638	90.4424593176362	89.4690764310967	87.6349853794305	84.0714820305714	76.1340991104813	48.2875248121207
91.2449277573502	91.2624067778992	91.1845495441961	90.9517449190049	90.4501647894499	89.4754789073279	87.6399155793041	84.0749430606304	76.1363012084495	48.2892610589894
91.2550190442211	91.2722515157281	91.1939546136714	90.96044277981	90.4578434052455	89.4818562306182	87.6448247221331	84.0783885377239	76.1384931552351	48.2909892232211
91.265090404708	91.2820748860885	91.2033358833203	90.9691146014602	90.4654952816939	89.4882085422224	87.649712945114	84.0818185717938	76.1406750254436	48.2927093650713
91.2751418070271	91.2918768762812	91.2126933771674	90.9777604557576	90.4731205348494	89.4945359822402	87.6545803840896	84.0852332715933	76.14284689284	48.2944215441065
91.2851732201324	91.3016574742958	91.2220271197162	90.9863804145189	90.4807192801518	89.500838689628	87.6594271735664	84.0886327447041	76.1450088303609	48.2961258192149
91.2951846137135	91.3114166688048	91.2313371359414	90.9949745495697	90.4882916324278	89.5071168022102	87.6642534467325	84.0920170975533	76.1471609101277	48.2978222486167
91.3051759581926	91.3211544491584	91.2406234512806	91.0035429327383	90.4958377058931	89.513370456691	87.6690593354745	84.0953864354305	76.1493032034584	48.2995108898743
91.3151472247219	91.330870805379	91.2498860916266	91.0120856358501	90.5033576141548	89.5195997886657	87.6738449703946	84.0987408625035	76.15143578088	48.3011917999023
91.3250983851805	91.340565728155	91.2591250833195	91.020602730722	90.5108514702129	89.5258049326321	87.6786104808271	84.1020804818349	76.1535587121402	48.3028650349776
91.3350294121712	91.3502392088362	91.268340453139	91.0290942891569	90.5183193864627	89.5319860220016	87.6833559948548	84.1054053953975	76.1556720662188	48.3045306507485
91.344940279018	91.3598912394271	91.2775322282966	91.0375603829385	90.5257614746971	89.5381431891103	87.688081639325	84.10871570409	76.1577759113394	48.3061887022448
91.3548309597624	91.369521812582	91.2867004364284	91.046001083826	90.5331778461086	89.5442765652298	87.6927875398656	84.1120115077523	76.1598703149804	48.3078392438864
91.3647014291601	91.3791309215994	91.2958451055877	91.0544164635493	90.5405686112917	89.550386280578	87.6974738209006	84.11529290518	76.161955343886	48.3094823294931
91.374551662678	91.3887185604158	91.3049662642372	91.0628065938039	90.5479338802452	89.55647246433	87.7021406056653	84.1185599941396	76.164031064077	48.3111180122929
91.3843816364905	91.3982847236006	91.3140639412423	91.0711715462461	90.5552737623746	89.5625352446284	87.7067880162215	84.1218128713826	76.1660975408612	48.3127463449312
91.3941913274761	91.4078294063501	91.3231381658636	91.0795113924887	90.5625883664946	89.5685747485938	87.7114161734725	84.1250516326597	76.168154838844	48.314367379479
91.4039807132136	91.4173526044822	91.3321889677501	91.0878262040961	90.5698778008313	89.5745911023352	87.7160251971776	84.1282763727348	76.1702030219385	48.3159811674418
91.4137497719788	91.4268543144304	91.3412163769321	91.0961160525802	90.5771421730249	89.5805844309603	87.7206152059666	84.1314871853988	76.1722421533754	48.3175877597676
91.4234984827402	91.4363345332383	91.3502204238143	91.1043810093959	90.5843815901324	89.5865548585854	87.725186317354	84.1346841634826	76.174272295713	48.3191872068551
91.4332268251558	91.445793258554	91.3592011391692	91.1126211459371	90.5915961586296	89.5925025083455	87.7297386477528	84.1378673988708	76.1762935108464	48.3207795585614
91.442934779569	91.4552304886244	91.3681585541304	91.1208365335328	90.5987859844143	89.598427502404	87.7342723124885	84.1410369825143	76.1783058600178	48.3223648642104
91.4526223270045	91.4646462222896	91.3770927001856	91.1290272434428	90.6059511728085	89.6043299619627	87.7387874258125	84.1441930044434	76.1803094038248	48.3239431726001
91.4622894491644	91.4740404589772	91.3860036091707	91.1371933468544	90.6130918285616	89.6102100072715	87.7432841009153	84.1473355537801	76.1823042022304	48.3255145320101
91.4719361284245	91.4834131986966	91.394891313263	91.145334914878	90.6202080558522	89.6160677576378	87.7477624499402	84.1504647187502	76.1842903145711	48.3270789902095
91.4815623478297	91.4927644420336	91.4037558449748	91.1534520185444	90.6272999582917	89.6219033314356	87.7522225839953	84.1535805866961	76.1862677995666	48.3286365944633
91.49116809109	91.5020941901446	91.4125972371475	91.1615447288003	90.6343676389265	89.6277168461157	87.7566646131672	84.156683244088	76.1882367153279	48.3301873915407
91.5007533425765	91.5114024447513	91.4214155229451	91.1696131165058	90.6414112002411	89.6335084182141	87.7610886465329	84.1597727765362	76.1901971193659	48.331731427721
91.510318087317	91.5206892081344	91.4302107358481	91.1776572524306	90.6484307441604	89.6392781633615	87.7654947921725	84.1628492688019	76.1921490685996	48.3332687488014
91.5198623109918	91.529954483129	91.4389829096479	91.1856772072508	90.6554263720531	89.6450261962924	87.769883157181	84.1659128048094	76.1940926193648	48.3347994001031
91.5293859999291	91.5391982731181	91.4477320784403	91.193673051546	90.6623981847338	89.6507526308539	87.7742538476808	84.1689634676563	76.1960278274217	48.3363234264785
91.538889141101	91.5484205820278	91.4564582766202	91.2016448557961	90.6693462824667	89.6564575800143	87.7786069688328	84.1720013396254	76.1979547479627	48.3378408723173
91.5483717221189	91.5576214143213	91.4651615388753	91.2095926903784	90.6762707649677	89.6621411558725	87.782942624849	84.1750265021944	76.199873435621	48.3393517815532
91.5578337312289	91.5668007749936	91.4738419001808	91.2175166255649	90.6831717314074	89.6678034696658	87.7872609190028	84.1780390360476	76.2017839444771	48.3408561976702
91.5672751573076	91.5759586695657	91.4824993957937	91.2254167315194	90.6900492804145	89.673444631779	87.7915619536414	84.1810390210855	76.2036863280673	48.3423541637086
91.5766959898576	91.5850951040797	91.4911340612472	91.2332930782948	90.6969035100779	89.6790647517526	87.795845830196	84.1840265364353	76.2055806393906	48.3438457222715
91.5860962190024	91.5942100850926	91.4997459323452	91.2411457358305	90.7037345179503	89.6846639382915	87.8001126491934	84.187001660461	76.2074669309159	48.3453309155302
91.5954758354827	91.6033036196714	91.508335045157	91.2489747739501	90.7105424010504	89.6902422992725	87.8043625102664	84.1899644707733	76.2093452545896	48.3468097852307
91.6048348306509	91.6123757153875	91.5169014360121	91.2567802623585	90.7173272558666	89.6957999417533	87.8085955121647	84.1929150442395	76.2112156618422	48.348282372699
91.6141731964673	91.6214263803113	91.5254451414946	91.2645622706402	90.7240891783593	89.7013369719801	87.812811752765	84.1958534569927	76.2130782035951	48.3497487188472
91.6234909254947	91.6304556230066	91.5339661984383	91.2723208682563	90.730828263964	89.7068534953955	87.8170113290819	84.1987797844416	76.214932930268	48.3512088641788
91.6327880108942	91.6394634525257	91.5424646439216	91.2800561245428	90.7375446075945	89.7123496166468	87.8211943372775	84.2016941012795	76.216779891785	48.3526628487941
91.6420644464205	91.6484498784037	91.5509405152624	91.2877681087082	90.7442383036453	89.7178254395935	87.8253608726717	84.2045964814939	76.2186191375814	48.3541107123962
91.6513202264169	91.657414910653	91.5593938500132	91.2954568898314	90.7509094459952	89.723281067315	87.8295110297522	84.2074869983748	76.22045071661	48.3555524942957
91.6605553458107	91.6663585597587	91.567824685956	91.3031225368599	90.7575581280095	89.7287166021184	87.833644902184	84.2103657245242	76.2222746773476	48.356988233416
91.6697698001086	91.6752808366726	91.5762330610979	91.3107651186076	90.7641844425436	89.7341321455458	87.837762582819	84.2132327318645	76.2240910678013	48.3584179682988
91.6789635853917	91.6841817528085	91.5846190136657	91.318384703753	90.7707884819457	89.7395277983821	87.8418641637058	84.216088091647	76.2258999355145	48.3598417371089
91.6881366983109	91.6930613200364	91.592982582102	91.3259813608376	90.7773703380596	89.7449036606621	87.8459497360984	84.2189318744606	76.227701327573	48.3612595776392
91.6972891360821	91.7019195506781	91.6013238050598	91.3335551582638	90.7839301022279	89.7502598316778	87.850019390466	84.2217641502397	76.2294952906107	48.3626715273154
91.7064208964812	91.7107564575011	91.6096427213987	91.3411061642933	90.7904678652947	89.7555964099859	87.854073216502	84.224584988273	76.2312818708159	48.3640776232012
91.7155319778397	91.7195720537143	91.6179393701795	91.3486344470455	90.7969837176088	89.7609134934145	87.8581113031324	84.2273944572107	76.2330611139367	48.3654779020028
91.7246223790394	91.7283663529624	91.6262137906607	91.356140074496	90.8034777490263	89.7662111790706	87.8621337385251	84.2301926250733	76.2348330652869	48.3668724000736
91.7336920995079	91.7371393693208	91.6344660222935	91.363623114475	90.8099500489141	89.7714895633465	87.8661406100987	84.2329795592588	76.2365977697513	48.3682611534186
91.7427411392138	91.745891117291	91.6426961047175	91.3710836346656	90.8164007061521	89.7767487419275	87.8701320045303	84.2357553265505	76.2383552717913	48.3696441976992
91.7517694986616	91.7546216117948	91.6509040777569	91.3785217026028	90.8228298091369	89.7819888097979	87.8741080077649	84.2385199931249	76.2401056154504	48.3710215682374
91.7607771788874	91.7633308681702	91.6590899814159	91.3859373856718	90.829237445784	89.7872098612483	87.8780687050231	84.2412736245586	76.2418488443593	48.3723933000202
91.7697641814531	91.7720189021658	91.6672538558747	91.3933307511066	90.8356237035313	89.7924119898822	87.8820141808094	84.2440162858359	76.2435850017414	48.3737594277041
91.7787305084429	91.7806857299358	91.6753957414854	91.4007018659892	90.8419886693418	89.7975952886222	87.8859445189205	84.2467480413562	76.2453141304176	48.375119985619
91.7876761624572	91.7893313680357	91.683515678768	91.408050797248	90.8483324297063	89.8027598497169	87.8898598024531	84.2494689549409	76.2470362728115	48.3764750077724
91.7966011466086	91.7979558334169	91.6916137084063	91.4153776116564	90.8546550706468	89.8079057647475	87.8937601138118	84.2521790898403	76.2487514709545	48.3778245278538
91.8055054645168	91.8065591434218	91.6996898712444	91.4226823758323	90.8609566777188	89.8130331246337	87.8976455347168	84.2548785087408	76.2504597664906	48.3791685792383
91.8143891203038	91.8151413157794	91.7077442082822	91.4299651562366	90.8672373360147	89.8181420196403	87.9015161462118	84.2575672737713	76.2521612006811	48.380507194991
91.8232521185889	91.8237023686003	91.7157767606722	91.437226019172	90.8734971301664	89.8232325393835	87.9053720286713	84.2602454465105	76.2538558144096	48.3818404078703
91.8320944644844	91.8322423203716	91.7237875697155	91.4444650307825	90.8797361443484	89.8283047728367	87.9092132618079	84.2629130879926	76.2555436481865	48.3831682503324
91.8409161635901	91.8407611899529	91.731776676858	91.451682257052	90.8859544622804	89.8333588083372	87.9130399246802	84.2655702587148	76.2572247421535	48.3844907545345
91.849717221989	91.8492589965709	91.7397441236871	91.4588777638035	90.8921521672301	89.8383947335917	87.9168520956996	84.2682170186429	76.2588991360885	48.385807952339
91.8584976462427	91.8577357598151	91.7476899519275	91.4660516166983	90.8983293420167	89.8434126356826	87.9206498526374	84.2708534272179	76.2605668694097	48.3871198753168
91.8672574433858	91.8661914996331	91.7556142034385	91.473203881235	90.9044860690128	89.8484126010738	87.9244332726322	84.2734795433624	76.2622279811802	48.3884265547511
91.8759966209221	91.874626236326	91.7635169202099	91.480334622749	90.9106224301479	89.8533947156163	87.9282024321965	84.2760954254863	76.2638825101121	48.3897280216407
91.884715186819	91.8830399905438	91.7713981443585	91.4874439064113	90.9167385069111	89.8583590645545	87.9319574072237	84.2787011314932	76.2655304945711	48.3910243067038
91.8934131495035	91.8914327832808	91.7792579181253	91.4945317972281	90.9228343803537	89.8633057325315	87.9356982729951	84.2812967187863	76.2671719725804	48.3923154403813
91.902090517857	91.8998046358713	91.7870962838715	91.5015983600398	90.9289101310922	89.8682348035947	87.9394251041861	84.2838822442738	76.268806981825	48.3936014528403
91.9107473012106	91.9081555699849	91.7949132840758	91.5086436595208	90.9349658393108	89.8731463612019	87.9431379748732	84.2864577643755	76.2704355596557	48.394882373977
91.9193835093407	91.9164856076222	91.8027089613305	91.5156677601784	90.9410015847647	89.8780404882261	87.9468369585401	84.2890233350276	76.2720577430932	48.3961582334205
91.9279991524639	91.9247947711103	91.8104833583389	91.5226707263522	90.9470174467823	89.8829172669617	87.9505221280847	84.2915790116889	76.2736735688318	48.3974290605359
91.9365942412328	91.9330830830986	91.818236517912	91.5296526222141	90.9530135042683	89.8877767791294	87.9541935558248	84.2941248493461	76.2752830732437	48.3986948844274
91.9451687867309	91.9413505665541	91.8259684829649	91.536613511767	90.9589898357064	89.8926191058816	87.9578513135048	84.2966609025192	76.2768862923823	48.3999557339412
91.9537228004683	91.9495972447576	91.8336792965144	91.5435534588448	90.9649465191617	89.8974443278081	87.9614954723015	84.2991872252672	76.2784832619866	48.4012116376691
91.9622562943767	91.9578231412988	91.8413690016757	91.5504725271117	90.9708836322841	89.9022525249407	87.9651261028305	84.3017038711929	76.2800740174844	48.4024626239514
91.9707692808052	91.9660282800728	91.8490376416594	91.557370780062	90.9768012523102	89.907043776759	87.9687432751521	84.3042108934483	76.2816585939962	48.4037087208793
91.9792617725157	91.974212685275	91.8566852597684	91.5642482810192	90.9826994560665	89.911818162195	87.972347058777	84.30670834474	76.2832370263388	48.4049499562988
91.9877337826778	91.9823763813979	91.8643118993956	91.571105093136	90.988578319972	89.9165757596386	87.9759375226726	84.3091962773339	76.2848093490289	48.4061863578131
91.9961853248648	91.990519393226	91.8719176040202	91.5779412793938	90.9944379200408	89.9213166469423	87.9795147352682	84.3116747430605	76.2863755962865	48.4074179527852
92.0046164130491	91.9986417458325	91.8795024172056	91.5847569026024	91.0002783318846	89.9260409014262	87.9830787644612	84.3141437933194	76.2879358020382	48.4086447683413
92.0130270615974	92.0067434645747	91.8870663825963	91.5915520253997	91.0060996307157	89.9307485998831	87.9866296776225	84.3166034790847	76.2894899999212	48.4098668313733
92.0214172852666	92.01482457509	91.8946095439152	91.5983267102511	91.0119018913494	89.9354398185832	87.990167541602	84.3190538509095	76.291038223286	48.4110841685416
92.0297870991989	92.0228851032922	91.9021319449609	91.6050810194496	91.0176851882065	89.9401146332789	87.9936924227341	84.3214949589305	76.2925805052	48.4122968062776
92.0381365189177	92.0309250753673	91.9096336296052	91.6118150151154	91.0234495953161	89.9447731192096	87.9972043868432	84.323926852873	76.2941168784509	48.4135047707867
92.0464655603231	92.0389445177694	91.9171146417903	91.6185287591958	91.029195186318	89.9494153511061	88.000703499249	84.3263495820551	76.2956473755495	48.4147080880506
92.0547742396874	92.046943457217	91.9245750255263	91.6252223134645	91.0349220344656	89.9540414031959	88.0041898247717	84.3287631953925	76.2971720287334	48.4159067838302
92.0630625736509	92.0549219206891	91.9320148248887	91.6318957395223	91.040630212628	89.9586513492071	88.0076634277372	84.3311677414029	76.2986908699696	48.417100883668
92.0713305792171	92.0628799354214	91.9394340840157	91.6385490987959	91.0463197932929	89.9632452623734	88.0111243719824	84.3335632682105	76.3002039309579	48.4182904128905
92.079578273749	92.0708175289023	91.9468328471062	91.6451824525386	91.0519908485688	89.9678232154384	88.0145727208602	84.3359498235501	76.3017112431341	48.4194753966108
92.0878056749645	92.0787347288691	91.9542111584166	91.6517958618296	91.057643450188	89.97238528066	88.018008537244	84.3383274547715	76.3032128376724	48.4206558597311
92.0960128009319	92.0866315633045	91.9615690622594	91.6583893875744	91.0632776695085	89.976931529815	88.0214318835338	84.340696208844	76.3047087454889	48.421831826945
92.1041996700658	92.0945080604327	91.9689066029998	91.6649630905041	91.0688935775169	89.9814620342034	88.0248428216597	84.34305613236	76.3061989972443	48.4230033227399
92.1123663011232	92.1023642487157	91.9762238250543	91.671517031176	91.0744912448309	89.9859768646524	88.0282414130878	84.3454072715397	76.3076836233469	48.4241703713993
92.1205127131987	92.1102001568496	91.9835207728876	91.678051269973	91.0800707417012	89.9904760915211	88.0316277188244	84.3477496722348	76.3091626539551	48.4253329970054
92.1286389257208	92.1180158137612	91.9907974910111	91.6845658671038	91.0856321380147	89.9949597847046	88.0350017994209	84.3500833799326	76.3106361189805	48.4264912234408
92.1367449584473	92.1258112486042	91.9980540239799	91.6910608826028	91.0911755032964	89.9994280136379	88.0383637149784	84.35240843976	76.3121040480907	48.4276450743913
92.1448308314616	92.1335864907557	92.0052904163915	91.6975363763303	91.0967009067121	90.0038808473004	88.0417135251521	84.3547248964872	76.3135664707117	48.4287945733478
92.1528965651683	92.1413415698126	92.0125067128827	91.7039924079723	91.1022084170703	90.0083183542196	88.0450512891562	84.3570327945319	76.3150234160308	48.4299397436085
92.1609421802892	92.1490765155883	92.0197029581282	91.7104290370405	91.1076981028253	90.0127406024756	88.048377065768	84.3593321779628	76.3164749129992	48.4310806082814
92.1689676978594	92.156791358109	92.0268791968381	91.7168463228725	91.113170032079	90.0171476597047	88.0516909133324	84.3616230905034	76.3179209903346	48.4322171902858
92.1769731392229	92.1644861276103	92.0340354737559	91.7232443246317	91.1186242725837	90.0215395931035	88.0549928897667	84.3639055755358	76.3193616765239	48.433349512355
92.1849585260289	92.172160854534	92.0411718336567	91.7296231013076	91.1240608917437	90.0259164694329	88.058283052564	84.3661796761042	76.3207969998253	48.4344775970379
92.1929238802277	92.1798155695245	92.0482883213449	91.7359827117154	91.1294799566187	90.0302783550218	88.0615614587985	84.3684454349185	76.3222269882714	48.4356014667013
92.2008692240668	92.1874503034257	92.0553849816523	91.7423232144968	91.134881533925	90.0346253157711	88.0648281651287	84.3707028943583	76.3236516696712	48.4367211435318
92.208794580087	92.1950650872772	92.0624618594363	91.7486446681196	91.1402656900385	90.0389574171574	88.0680832278023	84.3729520964755	76.3250710716126	48.437836649538
92.2166999711182	92.2026599523116	92.0695189995778	91.7549471308779	91.1456324909969	90.0432747242367	88.07132670266	84.3751930829986	76.3264852214652	48.4389480065521
92.2245854202762	92.2102349299511	92.0765564469793	91.7612306608923	91.1509820025016	90.0475773016482	88.0745586451395	84.3774258953357	76.3278941463822	48.4400552362319
92.2324509509579	92.2177900518039	92.0835742465634	91.7674953161101	91.1563142899202	90.051865213618	88.0777791102797	84.3796505745781	76.3292978733027	48.441158360063
92.2402965868385	92.2253253496614	92.0905724432703	91.7737411543053	91.1616294182888	90.0561385239627	88.0809881527243	84.3818671615032	76.3306964289544	48.4422573993604
92.248122351867	92.2328408554949	92.0975510820566	91.779968233079	91.1669274523142	90.0603972960927	88.0841858267261	84.3840756965783	76.3320898398558	48.4433523752704
92.2559282702624	92.2403366014528	92.1045102078934	91.7861766098592	91.1722084563757	90.0646415930165	88.0873721861506	84.3862762199636	76.3334781323181	48.4444433087725
92.2637143665108	92.2478126198566	92.1114498657641	91.7923663419014	91.1774724945279	90.0688714773434	88.0905472844798	84.3884687715153	76.3348613324476	48.445530220681
92.2714806653606	92.2552689431991	92.1183701006634	91.7985374862887	91.1827196305025	90.0730870112876	88.0937111748163	84.390653390789	76.3362394661481	48.4466131316471
92.2792271918196	92.2627056041402	92.1252709575949	91.8046900999318	91.1879499277105	90.077288256671	88.0968639098864	84.3928301170424	76.3376125591227	48.4476920621603
92.2869539711509	92.2701226355045	92.1321524815698	91.8108242395693	91.1931634492444	90.0814752749275	88.1000055420444	84.394998989239	76.3389806368763	48.4487670325504
92.2946610288695	92.2775200702784	92.1390147176054	91.8169399617681	91.1983602578801	90.0856481271056	88.1031361232759	84.3971600460507	76.3403437247173	48.4498380629892
92.3023483907388	92.2848979416067	92.145857710723	91.8230373229235	91.2035404160796	90.0898068738719	88.1062557052014	84.3993133258606	76.3417018477599	48.4509051734918
92.3100160827666	92.2922562827901	92.1526815059467	91.8291163792594	91.2087039859925	90.0939515755149	88.1093643390799	84.4014588667667	76.3430550309261	48.4519683839189
92.3176641312021	92.299595127282	92.1594861483015	91.8351771868288	91.2138510294581	90.0980822919476	88.1124620758123	84.403596706584	76.3444032989479	48.4530277139779
92.325292562532	92.3069145086858	92.1662716828122	91.8412198015136	91.218981608008	90.1021990827112	88.1155489659453	84.4057268828481	76.345746676369	48.4540831832247
92.3329014034771	92.3142144607521	92.1730381545013	91.8472442790254	91.2240957828675	90.1063020069781	88.1186250596739	84.4078494328174	76.3470851875468	48.4551348110653
92.3404906809889	92.3214950173757	92.179785608388	91.8532506749054	91.2291936149583	90.1103911235551	88.1216904068459	84.4099643934764	76.3484188566546	48.4561826167576
92.3480604222463	92.3287562125929	92.1865140894863	91.8592390445248	91.2342751648999	90.1144664908866	88.1247450569643	84.4120718015382	76.3497477076832	48.4572266194124
92.3556106546516	92.335998080579	92.193223642804	91.8652094430852	91.239340493012	90.1185281670576	88.1277890591912	84.4141716934475	76.3510717644431	48.4582668379956
92.3631414058281	92.3432206556451	92.1999143133407	91.8711619256188	91.2443896593164	90.122576209797	88.1308224623507	84.4162641053831	76.352391050566	48.4593032913291
92.3706527036158	92.3504239722359	92.2065861460869	91.8770965469886	91.2494227235388	90.1266106764803	88.1338453149324	84.4183490732605	76.3537055895071	48.4603359980929
92.3781445760687	92.3576080649264	92.2132391860223	91.8830133618889	91.2544397451112	90.1306316241329	88.1368576650943	84.420426632735	76.3550154045464	48.461364976826
92.3856170514511	92.3647729684202	92.2198734781144	91.8889124248456	91.2594407831734	90.1346391094331	88.1398595606662	84.4224968192035	76.3563205187909	48.4623902459282
92.3930701582349	92.3719187175457	92.2264890673175	91.8947937902165	91.2644258965751	90.1386331887147	88.1428510491527	84.4245596678082	76.3576209551764	48.4634118236615
92.4005039250955	92.3790453472546	92.2330859985709	91.9006575121914	91.2693951438782	90.1426139179704	88.1458321777362	84.4266152134379	76.3589167364688	48.4644297281516
92.4079183809094	92.3861528926187	92.2396643167978	91.9065036447929	91.2743485833578	90.1465813528541	88.1488029932801	84.4286634907316	76.3602078852663	48.465443977389
92.4153135547506	92.3932413888275	92.2462240669042	91.9123322418762	91.2792862730052	90.1505355486845	88.1517635423317	84.4307045340803	76.3614944240009	48.4664545892306
92.4226894758876	92.4003108711858	92.2527652937773	91.9181433571299	91.2842082705289	90.1544765604474	88.1547138711253	84.4327383776296	76.3627763749401	48.4674615814012
92.43004617378	92.407361375111	92.2592880422844	91.9239370440764	91.2891146333569	90.1584044427985	88.1576540255848	84.4347650552824	76.3640537601885	48.4684649714945
92.4373836780758	92.4143929361309	92.2657923572716	91.9297133560716	91.2940054186387	90.1623192500666	88.1605840513271	84.436784600701	76.3653266016897	48.4694647769747
92.444702018608	92.4214055898811	92.2722782835629	91.935472346306	91.2988806832467	90.1662210362557	88.1635039936644	84.4387970473096	76.3665949212277	48.4704610151778
92.4520012253919	92.4283993721026	92.2787458659583	91.9412140678046	91.3037404837781	90.1701098550485	88.1664138976076	84.4408024282966	76.3678587404285	48.4714537033129
92.4592813286215	92.4353743186396	92.2851951492335	91.9469385734277	91.3085848765573	90.1739857598085	88.1693138078688	84.4428007766167	76.3691180807618	48.4724428584632
92.4665423586672	92.4423304654368	92.2916261781381	91.9526459158708	91.3134139176368	90.1778488035826	88.1722037688639	84.4447921249937	76.3703729635423	48.4734284975876
92.4737843460722	92.4492678485374	92.2980389973946	91.9583361476653	91.3182276627999	90.1816990391044	88.1750838247159	84.4467765059222	76.3716234099318	48.4744106375221
92.48100732155	92.4561865040806	92.3044336516975	91.9640093211787	91.3230261675616	90.1855365187961	88.1779540192568	84.4487539516703	76.3728694409401	48.4753892949804
92.4882113159814	92.4630864682993	92.3108101857119	91.9696654886152	91.3278094871712	90.1893612947715	88.1808143960313	84.4507244942814	76.374111077427	48.4763644865558
92.4953963604114	92.4699677775181	92.3171686440728	91.9753047020159	91.3325776766134	90.1931734188384	88.1836649982983	84.4526881655765	76.3753483401034	48.4773362287218
92.5025624860466	92.4768304681508	92.3235090713835	91.9809270132592	91.3373307906103	90.1969729425012	88.1865058690346	84.4546449971566	76.3765812495329	48.4783045378341
92.5097097242521	92.4836745766981	92.329831512215	91.9865324740614	91.3420688836231	90.2007599169634	88.1893370509367	84.4565950204044	76.3778098261335	48.4792694301308
92.516838106549	92.4905001397459	92.3361360111046	91.9921211359768	91.346792009854	90.2045343931299	88.1921585864237	84.4585382664868	76.3790340901788	48.4802309217343
92.5239476646113	92.4973071939626	92.3424226125554	91.9976930503985	91.3515002232475	90.2082964216097	88.1949705176399	84.4604747663566	76.3802540617992	48.4811890286521
92.5310384302634	92.5040957760973	92.3486913610347	92.0032482685584	91.3561935774924	90.2120460527183	88.197772886457	84.4624045507549	76.3814697609839	48.4821437667782
92.5381104354773	92.5108659229775	92.3549423009733	92.0087868415277	91.3608721260234	90.2157833364801	88.2005657344768	84.4643276502128	76.3826812075818	48.4830951518938
92.5451637123698	92.5176176715072	92.3611754767648	92.0143088202177	91.3655359220226	90.2195083226305	88.2033491030338	84.4662440950538	76.3838884213029	48.4840431996689
92.5521982931998	92.5243510586644	92.3673909327639	92.0198142553796	91.3701850184213	90.2232210606186	88.2061230331972	84.4681539153953	76.3850914217198	48.4849879256629
92.5592142103657	92.5310661214998	92.3735887132862	92.0253031976055	91.3748194679018	90.2269215996097	88.2088875657736	84.4700571411508	76.3862902282691	48.4859293453262
92.5662114964031	92.537762897134	92.379768862607	92.0307756973285	91.3794393228987	90.230609988487	88.2116427413093	84.471953802032	76.3874848602525	48.4868674740008
92.5731901839815	92.544441422756	92.3859314249603	92.036231804823	91.3840446356006	90.2342862758542	88.2143886000926	84.4738439275503	76.3886753368383	48.4878023269216
92.5801503059023	92.551101735621	92.3920764445381	92.0416715702055	91.3886354579519	90.2379505100382	88.217125182156	84.4757275470191	76.3898616770625	48.4887339192175
92.587091895096	92.5577438730486	92.3982039654892	92.0470950434348	91.393211841654	90.2416027390906	88.2198525272789	84.4776046895555	76.3910438998302	48.4896622659122
92.5940149846197	92.5643678724206	92.4043140319186	92.0525022743124	91.3977738381673	90.2452430107903	88.2225706749895	84.4794753840818	76.392222023917	48.4905873819255
92.6009196076548	92.5709737711794	92.4104066878867	92.057893312483	91.4023214987125	90.2488713726459	88.2252796645668	84.4813396593281	76.3933960679697	48.4915092820739
92.607805797504	92.577561606826	92.4164819774084	92.0632682074351	91.4068548742721	90.2524878718974	88.2279795350437	84.4831975438334	76.3945660505083	48.492427981072
92.6146735875895	92.5841314169179	92.4225399444519	92.0686270085011	91.4113740155923	90.2560925555186	88.2306703252081	84.4850490659475	76.3957319899266	48.4933434935334
92.6215230114501	92.5906832390677	92.4285806329386	92.0739697648579	91.4158789731841	90.2596854702195	88.233352073606	84.486894253833	76.3968939044935	48.4942558339715
92.6283541027388	92.5972171109407	92.4346040867416	92.0792965255274	91.420369797325	90.2632666624479	88.2360248185429	84.4887331354672	76.3980518123546	48.4951650168004
92.6351668952209	92.6037330702538	92.4406103496854	92.0846073393769	91.4248465380605	90.2668361783919	88.2386885980866	84.490565738643	76.3992057315329	48.4960710563363
92.6419614227708	92.610231154773	92.446599465545	92.0899022551195	91.4293092452055	90.2703940639817	88.2413434500686	84.4923920909716	76.4003556799301	48.496973966798
92.6487377193708	92.616711402312	92.452571478045	92.0951813213146	91.4337579683462	90.2739403648919	88.2439894120868	84.4942122198834	76.4015016753277	48.4978737623078
92.6554958191075	92.6231738507306	92.458526430859	92.1004445863681	91.4381927568408	90.2774751265434	88.2466265215071	84.4960261526303	76.4026437353885	48.4987704568928
92.6622357561705	92.6296185379327	92.4644643676088	92.1056920985333	91.4426136598217	90.2809983941052	88.2492548154656	84.4978339162867	76.403781877657	48.4996640644855
92.6689575648498	92.6360455018646	92.4703853318638	92.1109239059111	91.4470207261964	90.2845102124969	88.2518743308708	84.4996355377516	76.4049161195613	48.5005545989248
92.6756612795334	92.6424547805134	92.47628936714	92.1161400564502	91.4514140046494	90.2880106263903	88.2544851044051	84.5014310437501	76.4060464784136	48.5014420739567
92.6823469347053	92.6488464119055	92.4821765168998	92.1213405979482	91.4557935436431	90.2914996802114	88.2570871725274	84.5032204608349	76.4071729714116	48.5023265032354
92.6890145649431	92.6552204341046	92.4880468245508	92.1265255780511	91.4601593914198	90.2949774181424	88.2596805714743	84.5050038153878	76.4082956156392	48.5032079003243
92.6956642049163	92.6615768852103	92.4939003334455	92.1316950442548	91.4645115960027	90.2984438841236	88.2622653372628	84.5067811336215	76.4094144280683	48.5040862786962
92.7022958893834	92.6679158033566	92.4997370868803	92.1368490439047	91.4688502051972	90.3018991218552	88.2648415056916	84.5085524415809	76.4105294255588	48.5049616517351
92.7089096531903	92.6742372267099	92.5055571280951	92.1419876241966	91.4731752665928	90.3053431747994	88.2674091123431	84.5103177651448	76.4116406248606	48.5058340327361
92.7155055312682	92.6805411934679	92.5113605002729	92.147110832177	91.477486827564	90.3087760861821	88.2699681925856	84.5120771300273	76.4127480426141	48.5067034349067
92.7220835586311	92.6868277418576	92.5171472465385	92.1522187147438	91.4817849352717	90.3121978989947	88.2725187815749	84.5138305617791	76.4138516953512	48.5075698713678
92.7286437703743	92.6930969101344	92.5229174099585	92.1573113186463	91.4860696366648	90.3156086559961	88.2750609142558	84.5155780857895	76.4149515994965	48.5084333551539
92.735186201672	92.6993487365798	92.5286710335403	92.1623886904858	91.4903409784812	90.3190083997143	88.2775946253645	84.5173197272872	76.4160477713682	48.5092938992146
92.7417108877751	92.7055832595004	92.5344081602318	92.1674508767165	91.4945990072495	90.3223971724485	88.2801199494301	84.5190555113422	76.4171402271789	48.5101515164147
92.7482178640097	92.7118005172264	92.5401288329206	92.1724979236452	91.4988437692901	90.3257750162703	88.2826369207763	84.5207854628671	76.4182289830371	48.5110062195355
92.7547071657749	92.7180005481099	92.5458330944337	92.1775298774325	91.5030753107165	90.3291419730262	88.2851455735232	84.5225096066183	76.4193140549473	48.5118580212754
92.7611788285406	92.7241833905239	92.5515209875364	92.1825467840927	91.5072936774366	90.3324980843387	88.287645941589	84.5242279671978	76.4203954588119	48.5127069342505
92.7676328878459	92.7303490828602	92.5571925549326	92.1875486894945	91.511498915154	90.3358433916085	88.2901380586919	84.525940569054	76.4214732104313	48.5135529709957
92.7740693792972	92.7364976635286	92.5628478392633	92.1925356393614	91.5156910693694	90.3391779360158	88.2926219583514	84.5276474364837	76.4225473255052	48.5143961439649
92.7804883385659	92.7426291709552	92.5684868831069	92.1975076792721	91.5198701853817	90.3425017585222	88.2950976738905	84.529348593633	76.4236178196337	48.5152364655324
92.7868898013871	92.7487436435812	92.5741097289779	92.2024648546611	91.5240363082893	90.3458148998725	88.2975652384368	84.5310440644987	76.4246847083179	48.5160739479931
92.793273803557	92.7548411198613	92.5797164193273	92.207407210819	91.5281894829914	90.349117400596	88.3000246849245	84.5327338729297	76.4257480069606	48.5169086035634
92.7996403809321	92.7609216382627	92.5853069965411	92.2123347928931	91.5323297541892	90.3524093010085	88.302476046096	84.5344180426283	76.4268077308679	48.5177404443821
92.8059895694263	92.7669852372632	92.5908815029407	92.2172476458876	91.5364571663871	90.3556906412137	88.3049193545033	84.5360965971515	76.4278638952492	48.5185694825108
92.8123214050098	92.7730319553508	92.596439980782	92.2221458146644	91.5405717638938	90.3589614611049	88.3073546425098	84.537769559912	76.4289165152187	48.5193957299346
92.8186359237072	92.7790618310214	92.6019824722545	92.2270293439433	91.544673590824	90.3622218003666	88.3097819422918	84.5394369541799	76.429965605796	48.520219198563
92.8249331615956	92.7850749027783	92.6075090194819	92.2318982783024	91.548762691099	90.3654716984759	88.3122012858399	84.5410988030837	76.431011181907	48.5210399002305
92.831213154803	92.7910712091306	92.6130196645206	92.2367526621788	91.5528391084482	90.3687111947045	88.3146127049608	84.5427551296114	76.4320532583845	48.5218578466973
92.8374759395063	92.7970507885919	92.6185144493598	92.2415925398689	91.5569028864102	90.3719403281197	88.3170162312787	84.544405956612	76.4330918499696	48.5226730496498
92.8437215519303	92.8030136796791	92.623993415921	92.2464179555289	91.560954068334	90.3751591375863	88.3194118962367	84.5460513067966	76.4341269713117	48.5234855207015
92.849950028345	92.8089599209115	92.6294566060575	92.2512289531752	91.5649926973802	90.378367661768	88.3217997310985	84.5476912027393	76.4351586369701	48.5242952713932
92.8561614050651	92.8148895508092	92.6349040615539	92.2560255766848	91.5690188165221	90.3815659391289	88.3241797669498	84.5493256668791	76.4361868614142	48.5251023131944
92.8623557184472	92.8208026078921	92.6403358241259	92.2608078697958	91.5730324685467	90.3847540079351	88.3265520346995	84.5509547215201	76.4372116590247	48.5259066575031
92.8685330048891	92.8266991306786	92.6457519354198	92.265575876108	91.5770336960562	90.3879319062561	88.3289165650817	84.5525783888335	76.438233044094	48.5267083156472
92.8746933008277	92.8325791576847	92.6511524370118	92.2703296390832	91.5810225414688	90.3910996719661	88.3312733886566	84.5541966908582	76.4392510308274	48.5275072988844
92.8808366427376	92.8384427274228	92.6565373704081	92.2750692020455	91.58499904702	90.3942573427457	88.3336225358121	84.5558096495023	76.4402656333435	48.5283036184033
92.8869630671295	92.8442898784001	92.6619067770445	92.2797946081819	91.5889632547635	90.3974049560832	88.3359640367654	84.5574172865439	76.4412768656752	48.5290972853239
92.8930726105487	92.8501206491184	92.6672606982854	92.2845059005431	91.5929152065726	90.4005425492761	88.3382979215641	84.5590196236324	76.4422847417701	48.5298883106981
92.8991653095734	92.855935078072	92.6725991754241	92.2892031220431	91.5968549441409	90.4036701594325	88.3406242200875	84.5606166822895	76.4432892754916	48.5306767055104
92.9052412008133	92.8617332037475	92.6779222496824	92.2938863154605	91.6007825089839	90.4067878234724	88.3429429620486	84.5622084839104	76.4442904806197	48.5314624806784
92.9113003209083	92.867515064622	92.6832299622096	92.2985555234383	91.6046979424396	90.4098955781292	88.3452541769945	84.5637950497647	76.4452883708513	48.5322456470536
92.9173427065265	92.8732806991626	92.6885223540831	92.303210788485	91.6086012856698	90.4129934599508	88.3475578943085	84.5653764009976	76.4462829598011	48.5330262154214
92.9233683943635	92.8790301458251	92.6937994663072	92.3078521529742	91.6124925796611	90.4160815053016	88.3498541432111	84.5669525586307	76.4472742610025	48.5338041965026
92.9293774211401	92.884763443053	92.6990613398134	92.3124796591459	91.6163718652259	90.4191597503629	88.3521429527613	84.5685235435637	76.4482622879081	48.5345796009529
92.9353698236017	92.8904806292766	92.7043080154597	92.3170933491062	91.6202391830037	90.4222282311352	88.3544243518579	84.5700893765744	76.4492470538903	48.5353524393645
92.9413456385161	92.8961817429117	92.7095395340306	92.3216932648285	91.6240945734617	90.4252869834387	88.356698369241	84.5716500783206	76.4502285722423	48.5361227222657
92.9473049026728	92.9018668223589	92.7147559362363	92.326279448153	91.6279380768963	90.4283360429152	88.3589650334928	84.5732056693407	76.4512068561785	48.5368904601223
92.9532476528812	92.9075359060028	92.7199572627131	92.3308519407882	91.6317697334335	90.4313754450292	88.3612243730394	84.5747561700548	76.4521819188352	48.5376556633373
92.9591739259694	92.9131890322104	92.7251435540224	92.3354107843103	91.6355895830306	90.4344052250689	88.3634764161515	84.5763016007656	76.4531537732715	48.5384183422522
92.9650837587829	92.9188262393308	92.7303148506508	92.3399560201645	91.6393976654769	90.4374254181479	88.365721190946	84.5778419816593	76.4541224324696	48.539178507147
92.970977188183	92.9244475656939	92.7354711930099	92.3444876896649	91.6431940203946	90.4404360592062	88.3679587253874	84.579377332807	76.4550879093358	48.5399361682411
92.9768542510459	92.9300530496096	92.7406126214357	92.3490058339949	91.6469786872397	90.4434371830116	88.3701890472882	84.580907674165	76.4560502167009	48.5406913356933
92.9827149842609	92.935642729367	92.7457391761887	92.3535104942083	91.6507517053035	90.4464288241609	88.3724121843111	84.5824330255764	76.4570093673207	48.5414440196029
92.9885594247298	92.9412166432333	92.7508508974533	92.3580017112289	91.6545131137128	90.4494110170808	88.3746281639693	84.5839534067714	76.4579653738771	48.54219423001
92.994387609365	92.9467748294529	92.7559478253377	92.3624795258513	91.6582629514317	90.4523837960298	88.3768370136283	84.5854688373687	76.4589182489785	48.5429419768956
93.0001995750884	92.9523173262467	92.7610299998737	92.3669439787414	91.6620012572618	90.4553471950986	88.3790387605068	84.5869793368762	76.45986800516	48.5436872701828
93.0059953588306	92.9578441718112	92.7660974610164	92.3713951104368	91.6657280698437	90.4583012482119	88.3812334316777	84.5884849246921	76.4608146548848	48.5444301197368
93.011774997529	92.9633554043177	92.7711502486441	92.3758329613471	91.6694434276576	90.4612459891294	88.3834210540695	84.5899856201054	76.4617582105441	48.5451705353654
93.0175385281272	92.9688510619111	92.7761884025576	92.3802575717544	91.6731473690244	90.4641814514469	88.3856016544673	84.5914814422973	76.4626986844581	48.5459085268198
93.0232859875733	92.9743311827096	92.7812119624806	92.3846689818138	91.6768399321066	90.4671076685973	88.3877752595139	84.5929724103417	76.4636360888764	48.5466441037946
93.0290174128192	92.9797958048037	92.7862209680591	92.3890672315535	91.6805211549093	90.4700246738523	88.3899418957111	84.594458543206	76.4645704359787	48.5473772759288
93.034732840819	92.985244966255	92.7912154588613	92.3934523608757	91.6841910752808	90.4729325003228	88.3921015894203	84.5959398597524	76.4655017378753	48.5481080528058
93.0404323085284	92.990678705096	92.7961954743774	92.3978244095568	91.6878497309139	90.4758311809606	88.3942543668641	84.5974163787385	76.4664300066077	48.5488364439543
93.0461158529029	92.9960970593291	92.8011610540194	92.4021834172478	91.6914971593465	90.4787207485594	88.3964002541272	84.5988881188178	76.4673552541492	48.5495624588482
93.0517835108971	93.0015000669257	92.8061122371206	92.4065294234744	91.6951333979628	90.4816012357557	88.3985392771572	84.6003550985413	76.4682774924053	48.5502861069076
93.0574353194637	93.0068877658256	92.811049062936	92.4108624676383	91.6987584839939	90.4844726750299	88.4006714617661	84.6018173363577	76.4691967332144	48.5510073974989
93.0630713155521	93.012260193936	92.8159715706418	92.4151825890167	91.7023724545186	90.4873350987078	88.402796833631	84.6032748506142	76.4701129883486	48.5517263399354
93.0686915361075	93.0176173891312	92.820879799335	92.419489826763	91.7059753464648	90.4901885389612	88.4049154182952	84.6047276595579	76.4710262695136	48.5524429434778
93.0742960180696	93.0229593892515	92.8257737880336	92.4237842199076	91.7095671966097	90.4930330278091	88.4070272411693	84.6061757813359	76.4719365883497	48.5531572173342
93.079884798372	93.0282862321027	92.8306535756763	92.4280658073579	91.7131480415811	90.4958685971189	88.4091323275322	84.6076192339965	76.4728439564325	48.5538691706611
93.0854579139409	93.0335979554552	92.835519201122	92.4323346278987	91.7167179178583	90.4986952786075	88.4112307025319	84.6090580354901	76.4737483852727	48.5545788125636
93.0910154016939	93.0388945970436	92.8403707031504	92.4365907201928	91.7202768617724	90.5015131038418	88.4133223911867	84.6104922036695	76.4746498863174	48.5552861520957
93.0965572985393	93.0441761945655	92.8452081204611	92.4408341227813	91.7238249095078	90.5043221042405	88.4154074183861	84.6119217562909	76.4755484709503	48.5559911982607
93.102083641375	93.0494427856814	92.8500314916738	92.4450648740842	91.7273620971026	90.5071223110745	88.4174858088921	84.613346711015	76.4764441504921	48.5566939600118
93.1075944670875	93.0546944080138	92.8548408553281	92.4492830124004	91.7308884604496	90.5099137554682	88.4195575873392	84.6147670854072	76.4773369362012	48.5573944462527
93.1130898125509	93.0599310991465	92.8596362498834	92.4534885759087	91.7344040352971	90.5126964684006	88.4216227782366	84.6161828969386	76.4782268392739	48.5580926658372
93.118569714626	93.0651528966238	92.8644177137185	92.4576816026675	91.7379088572497	90.515470480706	88.4236814059683	84.6175941629869	76.4791138708453	48.5587886275704
93.1240342101593	93.0703598379504	92.869185285132	92.4618621306158	91.7414029617692	90.518235823075	88.4257334947941	84.6190009008368	76.4799980419897	48.5594823402089
93.1294833359822	93.0755519605901	92.8739390023418	92.4660301975732	91.744886384175	90.5209925260559	88.427779068851	84.6204031276809	76.4808793637206	48.560173812461
93.1349171289098	93.0807293019656	92.8786789034847	92.4701858412408	91.7483591596456	90.5237406200552	88.4298181521536	84.6218008606205	76.4817578469921	48.5608630529872
93.1403356257404	93.0858918994579	92.883405026617	92.4743290992008	91.7518213232187	90.5264801353386	88.4318507685953	84.6231941166662	76.4826335026982	48.5615500704004
93.1457388632542	93.0910397904056	92.8881174097139	92.4784600089178	91.7552729097923	90.5292111020323	88.433876941949	84.6245829127384	76.4835063416746	48.5622348732668
93.1511268782126	93.0961730121041	92.8928160906693	92.4825786077385	91.7587139541257	90.5319335501235	88.4358966958682	84.6259672656685	76.4843763746978	48.5629174701056
93.1564997073575	93.1012916018055	92.8975011072961	92.4866849328924	91.7621444908396	90.5346475094618	88.4379100538876	84.6273471921992	76.4852436124866	48.5635978693899
93.1618573874101	93.1063955967176	92.9021724973258	92.4907790214923	91.7655645544177	90.5373530097596	88.4399170394245	84.6287227089851	76.4861080657023	48.5642760795467
93.1671999550701	93.1114850340035	92.9068302984085	92.4948609105343	91.7689741792069	90.5400500805933	88.441917675779	84.6300938325939	76.4869697449487	48.5649521089575
93.1725274470153	93.1165599507811	92.9114745481129	92.4989306368987	91.772373399418	90.5427387514045	88.4439119861351	84.6314605795064	76.4878286607731	48.5656259659587
93.1778398999003	93.1216203841225	92.9161052839258	92.5029882373499	91.7757622491269	90.5454190515001	88.4458999935619	84.6328229661176	76.4886848236666	48.5662976588416
93.1831373503557	93.1266663710533	92.9207225432526	92.5070337485373	91.779140762275	90.548091010054	88.4478817210139	84.6341810087372	76.4895382440642	48.5669671958532
93.1884198349875	93.1316979485525	92.9253263634168	92.5110672069951	91.7825089726701	90.5507546561077	88.4498571913322	84.6355347235905	76.4903889323457	48.5676345851963
93.1936873903765	93.1367151535515	92.9299167816602	92.5150886491432	91.7858669139869	90.5534100185708	88.4518264272451	84.6368841268185	76.4912368988359	48.5682998350296
93.1989400530768	93.141718022934	92.9344938351424	92.5190981112873	91.789214619768	90.5560571262226	88.4537894513691	84.638229234479	76.4920821538051	48.5689629534688
93.2041778596158	93.1467065935349	92.9390575609414	92.5230956296195	91.7925521234245	90.5586960077123	88.4557462862097	84.6395700625473	76.4929247074694	48.5696239485861
93.2094008464932	93.1516809021408	92.9436079960528	92.5270812402182	91.7958794582366	90.5613266915601	88.4576969541619	84.6409066269162	76.4937645699911	48.570282828411
93.2146090501798	93.1566409854883	92.9481451773902	92.5310549790492	91.7991966573547	90.5639492061583	88.4596414775114	84.6422389433975	76.4946017514796	48.5709396009306
93.2198025071175	93.1615868802646	92.9526691417852	92.5350168819656	91.8025037537996	90.5665635797716	88.461579878435	84.6435670277217	76.4954362619909	48.5715942740898
93.2249812537181	93.1665186231063	92.9571799259868	92.5389669847082	91.8058007804634	90.5691698405385	88.4635121790017	84.6448908955394	76.4962681115289	48.5722468557918
93.2301453263625	93.1714362505992	92.9616775666621	92.542905322906	91.8090877701103	90.5717680164715	88.4654384011735	84.6462105624214	76.4970973100452	48.572897353898
93.2352947614005	93.1763397992781	92.9661621003957	92.5468319320766	91.8123647553774	90.5743581354587	88.4673585668057	84.6475260438595	76.4979238674399	48.5735457762289
93.2404295951496	93.1812293056257	92.9706335636896	92.5507468476265	91.815631768775	90.5769402252639	88.4692726976482	84.6488373552669	76.4987477935617	48.5741921305641
93.2455498638945	93.186104806073	92.9750919929639	92.5546501048514	91.8188888426874	90.5795143135276	88.4711808153459	84.6501445119791	76.4995690982084	48.5748364246426
93.2506556038865	93.1909663369979	92.9795374245556	92.5585417389369	91.8221360093738	90.582080427768	88.4730829414394	84.6514475292543	76.5003877911274	48.5754786661632
93.2557468513426	93.1958139347257	92.9839698947198	92.5624217849583	91.8253733009688	90.5846385953818	88.4749790973663	84.6527464222737	76.5012038820157	48.5761188627847
93.2608236424451	93.2006476355282	92.9883894396287	92.5662902778815	91.8286007494831	90.5871888436446	88.4768693044612	84.6540412061427	76.502017380521	48.5767570221263
93.2658860133409	93.2054674756231	92.992796095372	92.5701472525633	91.831818386804	90.5897311997119	88.4787535839568	84.6553318958908	76.5028282962412	48.5773931517679
93.2709340001406	93.2102734911742	92.997189897957	92.5739927437513	91.8350262446965	90.5922656906201	88.4806319569845	84.6566185064726	76.5036366387253	48.5780272592504
93.2759676389182	93.2150657182905	93.0015708833081	92.577826786085	91.8382243548032	90.5947923432869	88.4825044445753	84.6579010527681	76.5044424174738	48.5786593520759
93.2809869657104	93.2198441930258	93.0059390872673	92.5816494140954	91.8414127486458	90.5973111845122	88.4843710676603	84.6591795495836	76.5052456419389	48.579289437708
93.2859920165159	93.2246089513789	93.0102945455939	92.5854606622059	91.8445914576252	90.5998222409788	88.4862318470714	84.6604540116516	76.5060463215246	48.5799175235723
93.2909828272946	93.2293600292923	93.0146372939645	92.5892605647326	91.8477605130221	90.6023255392533	88.4880868035421	84.6617244536319	76.5068444655877	48.5805436170565
93.2959594339676	93.2340974626527	93.018967367973	92.5930491558845	91.850919945998	90.6048211057866	88.4899359577081	84.6629908901122	76.5076400834377	48.5811677255105
93.3009218724161	93.2388212872901	93.0232848031307	92.5968264697637	91.8540697875955	90.6073089669149	88.4917793301081	84.6642533356079	76.508433184337	48.5817898562472
93.3058701784808	93.2435315389776	93.0275896348662	92.6005925403663	91.8572100687392	90.60978914886	88.4936169411842	84.6655118045633	76.5092237775018	48.5824100165424
93.3108043879619	93.2482282534312	93.0318818985254	92.6043474015822	91.8603408202359	90.6122616777307	88.4954488112829	84.6667663113521	76.5100118721021	48.5830282136349
93.3157245366177	93.2529114663091	93.0361616293715	92.6080910871958	91.8634620727756	90.6147265795226	88.4972749606556	84.6680168702775	76.5107974772617	48.5836444547273
93.3206306601647	93.2575812132119	93.0404288625851	92.6118236308862	91.8665738569321	90.6171838801198	88.499095409459	84.6692634955729	76.5115806020595	48.5842587469858
93.325522794277	93.2622375296815	93.0446836332639	92.6155450662276	91.8696762031634	90.6196336052947	88.5009101777563	84.6705062014026	76.5123612555287	48.5848710975409
93.3304009745855	93.2668804512015	93.0489259764231	92.6192554266897	91.8727691418122	90.6220757807093	88.5027192855173	84.6717450018618	76.513139446658	48.5854815134872
93.3352652366773	93.2715100131966	93.0531559269953	92.622954745638	91.8758527031069	90.6245104319156	88.5045227526196	84.6729799109779	76.5139151843915	48.586090001884
93.3401156160957	93.2761262510322	93.0573735198303	92.6266430563339	91.8789269171619	90.6269375843565	88.5063205988484	84.6742109427099	76.5146884776291	48.5866965697553
93.3449521483391	93.2807292000141	93.0615787896954	92.6303203919357	91.8819918139782	90.6293572633661	88.508112843898	84.67543811095	76.5154593352268	48.5873012240904
93.3497748688609	93.2853188953885	93.0657717712751	92.6339867854982	91.8850474234441	90.6317694941707	88.509899507372	84.6766614295233	76.5162277659972	48.5879039718438
93.354583813069	93.2898953723413	93.0699524991714	92.6376422699736	91.8880937753356	90.6341743018895	88.5116806087837	84.6778809121885	76.5169937787096	48.5885048199357
93.3593790163249	93.294458665998	93.0741210079038	92.6412868782116	91.8911308993172	90.636571711535	88.5134561675573	84.6790965726385	76.5177573820904	48.5891037752522
93.3641605139436	93.2990088114234	93.0782773319093	92.6449206429596	91.8941588249424	90.6389617480138	88.5152262030279	84.6803084245007	76.5185185848233	48.5897008446453
93.3689283411932	93.3035458436215	93.0824215055421	92.6485435968634	91.8971775816539	90.6413444361271	88.5169907344425	84.6815164813376	76.5192773955499	48.5902960349336
93.3736825332941	93.3080697975346	93.0865535630742	92.6521557724674	91.9001871987849	90.6437198005717	88.5187497809602	84.6827207566469	76.5200338228695	48.5908893529021
93.3784231254188	93.312580708044	93.090673538695	92.6557572022146	91.9031877055589	90.6460878659403	88.5205033616534	84.6839212638627	76.5207878753401	48.5914808053028
93.3831501526912	93.3170786099689	93.0947814665115	92.6593479184477	91.9061791310909	90.6484486567221	88.5222514955076	84.6851180163549	76.521539561478	48.5920703988547
93.3878636501867	93.3215635380665	93.0988773805483	92.6629279534085	91.9091615043873	90.6508021973038	88.5239942014227	84.6863110274308	76.5222888897584	48.592658140244
93.3925636529309	93.3260355270318	93.1029613147477	92.6664973392389	91.9121348543469	90.6531485119698	88.5257314982131	84.6875003103345	76.523035868616	48.5932440361246
93.3972501959002	93.3304946114973	93.1070333029696	92.6700561079812	91.9150992097615	90.655487624903	88.5274634046084	84.688685878248	76.5237805064445	48.5938280931182
93.4019233140203	93.3349408260324	93.1110933789918	92.673604291578	91.9180545993161	90.6578195601856	88.5291899392541	84.6898677442914	76.5245228115979	48.5944103178144
93.4065830421668	93.339374205144	93.1151415765097	92.677141921873	91.9210010515895	90.6601443417992	88.5309111207118	84.6910459215232	76.5252627923897	48.594990716771
93.4112294151642	93.3437947832752	93.1191779291367	92.680669030611	91.9239385950552	90.6624619936259	88.5326269674602	84.6922204229411	76.5260004570942	48.5955692965143
93.4158624677854	93.348202594806	93.1232024704038	92.6841856494384	91.9268672580814	90.6647725394487	88.5343374978952	84.6933912614821	76.526735813946	48.5961460635395
93.4204822347518	93.3525976740526	93.1272152337604	92.6876918099037	91.9297870689319	90.6670760029522	88.5360427303308	84.6945584500229	76.5274688711407	48.5967210243103
93.4250887507326	93.3569800552672	93.1312162525733	92.6911875434573	91.9326980557664	90.6693724077227	88.5377426829996	84.6957220013804	76.5281996368351	48.5972941852599
93.4296820503444	93.3613497726381	93.1352055601278	92.6946728814523	91.9356002466413	90.6716617772496	88.539437374053	84.6968819283125	76.5289281191474	48.5978655527905
93.4342621681511	93.3657068602891	93.1391831896271	92.6981478551447	91.9384936695097	90.6739441349253	88.5411268215619	84.6980382435175	76.5296543261574	48.5984351332741
93.438829138663	93.3700513522793	93.1431491741926	92.7016124956937	91.9413783522225	90.6762195040459	88.5428110435176	84.6991909596358	76.530378265907	48.5990029330525
93.4433829963371	93.3743832826035	93.1471035468638	92.7050668341618	91.9442543225286	90.6784879078122	88.5444900578316	84.700340089249	76.5310999464001	48.5995689584372
93.4479237755763	93.3787026851913	93.1510463405987	92.7085109015156	91.9471216080752	90.6807493693298	88.5461638823369	84.7014856448813	76.5318193756035	48.6001332157102
93.4524515107292	93.383009593907	93.1549775882733	92.7119447286259	91.9499802364089	90.6830039116096	88.5478325347877	84.7026276389995	76.5325365614463	48.6006957111236
93.4569662360898	93.3873040425502	93.1588973226824	92.7153683462676	91.9528302349756	90.6852515575687	88.5494960328605	84.7037660840133	76.5332515118208	48.6012564509004
93.4614679858969	93.3915860648544	93.162805576539	92.7187817851208	91.9556716311212	90.6874923300309	88.5511543941545	84.7049009922756	76.5339642345827	48.6018154412341
93.4659567943342	93.3958556944879	93.1667023824748	92.7221850757704	91.958504452092	90.6897262517269	88.5528076361917	84.7060323760835	76.5346747375509	48.6023726882895
93.4704326955298	93.4001129650528	93.1705877730399	92.725578248707	91.9613287250356	90.6919533452953	88.5544557764181	84.7071602476777	76.5353830285083	48.6029281982025
93.4748957235555	93.4043579100857	93.1744617807033	92.7289613343267	91.9641444770009	90.6941736332828	88.5560988322034	84.7082846192438	76.5360891152016	48.6034819770802
93.4793459124273	93.4085905630565	93.1783244378526	92.7323343629318	91.9669517349386	90.6963871381448	88.557736820842	84.7094055029121	76.5367930053421	48.6040340310015
93.4837832961042	93.4128109573692	93.1821757767945	92.7356973647309	91.9697505257021	90.698593882246	88.5593697595534	84.7105229107582	76.5374947066051	48.6045843660172
93.4882079084887	93.4170191263612	93.1860158297543	92.7390503698392	91.9725408760474	90.700793887861	88.5609976654825	84.7116368548032	76.5381942266311	48.6051329881498
93.4926197834259	93.4212151033034	93.1898446288765	92.7423934082791	91.9753228126341	90.7029871771745	88.5626205557002	84.7127473470143	76.5388915730252	48.6056799033942
93.4970189547034	93.4253989213997	93.1936622062245	92.74572650998	91.9780963620254	90.7051737722823	88.5642384472039	84.713854399305	76.5395867533579	48.6062251177175
93.5014054560514	93.4295706137874	93.197468593781	92.7490497047792	91.980861550689	90.7073536951911	88.5658513569178	84.7149580235352	76.5402797751651	48.6067686370596
93.5057793211416	93.4337302135367	93.201263823448	92.7523630224216	91.9836184049971	90.7095269678199	88.5674593016935	84.7160582315123	76.5409706459483	48.6073104673327
93.510140583588	93.4378777536504	93.2050479270465	92.7556664925606	91.9863669512274	90.7116936119998	88.5690622983104	84.7171550349906	76.5416593731752	48.6078506144225
93.5144892769455	93.4420132670643	93.2088209363174	92.7589601447578	91.9891072155628	90.7138536494748	88.5706603634762	84.7182484456723	76.5423459642792	48.6083890841873
93.5188254347106	93.4461367866467	93.2125828829206	92.7622440084839	91.9918392240928	90.7160071019021	88.5722535138272	84.7193384752078	76.5430304266603	48.6089258824589
93.5231490903205	93.4502483451983	93.2163337984359	92.7655181131185	91.994563002813	90.7181539908528	88.573841765929	84.7204251351956	76.543712767685	48.6094610150427
93.5274602771533	93.4543479754523	93.2200737143627	92.7687824879507	91.9972785776263	90.7202943378124	88.5754251362767	84.721508437183	76.5443929946867	48.6099944877174
93.5317590285273	93.4584357100738	93.2238026621202	92.7720371621793	91.9999859743428	90.7224281641811	88.5770036412953	84.7225883926666	76.5450711149657	48.6105263062358
93.5360453777013	93.4625115816603	93.2275206730475	92.7752821649132	92.0026852186806	90.7245554912743	88.5785772973406	84.723665013092	76.5457471357896	48.6110564763246
93.5403193578737	93.4665756227413	93.2312277784034	92.7785175251714	92.005376336266	90.7266763403233	88.5801461206988	84.7247383098549	76.5464210643934	48.6115850036846
93.544581002183	93.4706278657782	93.234924009367	92.7817432718837	92.008059352634	90.7287907324754	88.5817101275877	84.7258082943005	76.5470929079799	48.612111893991
93.5488303437071	93.4746683431641	93.2386093970377	92.7849594338907	92.0107342932289	90.7308986887947	88.5832693341568	84.726874977725	76.5477626737195	48.6126371528936
93.5530674154631	93.4786970872238	93.2422839724347	92.7881660399442	92.0134011834044	90.7330002302625	88.5848237564876	84.7279383713747	76.5484303687511	48.6131607860167
93.5572922504072	93.4827141302139	93.2459477664979	92.7913631187076	92.0160600484242	90.7350953777775	88.5863734105943	84.7289984864473	76.5490960001815	48.6136827989595
93.5615048814347	93.4867195043224	93.2496008100876	92.7945506987557	92.0187109134626	90.7371841521566	88.587918312424	84.7300553340915	76.5497595750862	48.6142031972962
93.5657053413793	93.4907132416687	93.2532431339846	92.7977288085759	92.0213538036046	90.7392665741351	88.5894584778571	84.7311089254077	76.5504211005094	48.6147219865762
93.5698936630133	93.4946953743036	93.2568747688903	92.8008974765675	92.0239887438464	90.7413426643675	88.5909939227077	84.7321592714483	76.5510805834642	48.6152391723243
93.5740698790473	93.4986659342093	93.2604957454269	92.8040567310427	92.0266157590958	90.7434124434274	88.5925246627243	84.7332063832178	76.5517380309327	48.6157547600406
93.5782340221298	93.502624953299	93.2641060941375	92.8072066002265	92.029234874173	90.7454759318084	88.5940507135898	84.7342502716732	76.5523934498665	48.6162687552009
93.5823861248473	93.5065724634171	93.2677058454863	92.8103471122571	92.0318461138103	90.7475331499243	88.5955720909219	84.7352909477245	76.5530468471866	48.616781163257
93.5865262197241	93.5105084963392	93.2712950298583	92.8134782951863	92.034449502653	90.7495841181096	88.597088810274	84.7363284222345	76.5536982297836	48.6172919896365
93.590654339222	93.5144330837717	93.2748736775599	92.8166001769797	92.0370450652597	90.7516288566201	88.598600887135	84.7373627060197	76.5543476045182	48.617801239743
93.59477051574	93.518346257352	93.2784418188187	92.8197127855168	92.0396328261027	90.753667385633	88.6001083369298	84.7383938098501	76.5549949782211	48.6183089189567
93.5988747816144	93.5222480486483	93.2819994837837	92.8228161485916	92.0422128095682	90.7556997252476	88.60161117502	84.7394217444497	76.5556403576932	48.6188150326339
93.6029671691186	93.5261384891598	93.2855467025255	92.8259102939127	92.044785039957	90.7577258954855	88.6031094167039	84.740446520497	76.5562837497061	48.6193195861077
93.6070477104627	93.5300176103162	93.2890835050364	92.8289952491034	92.0473495414848	90.7597459162914	88.6046030772172	84.7414681486247	76.5569251610018	48.6198225846878
93.6111164377935	93.5338854434781	93.2926099212302	92.8320710417025	92.0499063382824	90.7617598075329	88.6060921717331	84.7424866394206	76.5575645982931	48.6203240336608
93.6151733831945	93.5377420199365	93.2961259809427	92.835137699164	92.0524554543962	90.7637675890015	88.6075767153627	84.7435020034274	76.5582020682643	48.6208239382904
93.6192185786855	93.5415873709134	93.2996317139318	92.8381952488579	92.0549969137888	90.7657692804127	88.6090567231556	84.7445142511433	76.5588375775702	48.6213223038175
93.6232520562225	93.5454215275609	93.3031271498774	92.8412437180699	92.0575307403389	90.7677649014065	88.6105322100998	84.7455233930223	76.5594711328377	48.62181913546
93.6272738476978	93.549244520962	93.3066123183815	92.8442831340022	92.0600569578422	90.7697544715478	88.6120031911229	84.7465294394741	76.5601027406646	48.6223144384137
93.6312839849394	93.55305638213	93.3100872489685	92.8473135237736	92.0625755900114	90.7717380103267	88.6134696810912	84.7475324008646	76.5607324076211	48.6228082178516
93.6352824997113	93.5568571420086	93.3135519710853	92.8503349144195	92.0650866604768	90.7737155371591	88.6149316948114	84.7485322875165	76.5613601402488	48.6233004789247
93.6392694237131	93.5606468314719	93.3170065141014	92.8533473328926	92.0675901927864	90.7756870713869	88.61638924703	84.7495291097087	76.5619859450616	48.6237912267618
93.6432447885803	93.5644254813246	93.320450907309	92.856350806063	92.0700862104066	90.7776526322784	88.6178423524338	84.7505228776777	76.5626098285457	48.6242804664697
93.6472086258833	93.5681931223015	93.3238851799228	92.8593453607182	92.0725747367224	90.7796122390289	88.6192910256508	84.7515136016167	76.5632317971598	48.6247682031334
93.6511609671284	93.5719497850678	93.3273093610809	92.8623310235639	92.0750557950378	90.7815659107607	88.6207352812498	84.7525012916768	76.563851857335	48.6252544418161
93.6551018437568	93.5756955002191	93.3307234798443	92.8653078212237	92.0775294085759	90.7835136665241	88.6221751337413	84.7534859579667	76.5644700154753	48.6257391875595
93.6590312871448	93.5794302982811	93.3341275651969	92.8682757802399	92.0799956004798	90.785455525297	88.6236105975774	84.7544676105531	76.5650862779577	48.6262224453839
93.6629493286039	93.58315420971	93.3375216460463	92.8712349270735	92.0824543938124	90.7873915059859	88.6250416871526	84.7554462594611	76.5657006511322	48.6267042202881
93.6668559993803	93.586867264892	93.3409057512233	92.8741852881041	92.0849058115571	90.7893216274259	88.6264684168037	84.7564219146743	76.5663131413222	48.6271845172501
93.6707513306551	93.5905694941437	93.3442799094823	92.8771268896311	92.0873498766182	90.7912459083815	88.6278908008103	84.7573945861351	76.5669237548245	48.6276633412264
93.6746353535439	93.5942609277119	93.3476441495016	92.8800597578729	92.0897866118208	90.7931643675462	88.6293088533953	84.7583642837447	76.5675324979094	48.6281406971529
93.6785080990974	93.5979415957735	93.3509984998829	92.8829839189679	92.0922160399117	90.7950770235438	88.6307225887247	84.7593310173637	76.5681393768211	48.6286165899445
93.6823695983001	93.6016115284358	93.3543429891522	92.8858993989746	92.0946381835594	90.7969838949281	88.6321320209088	84.7602947968124	76.5687443977778	48.6290910244957
93.6862198820716	93.6052707557361	93.3576776457595	92.8888062238717	92.0970530653544	90.7988850001834	88.6335371640014	84.7612556318707	76.5693475669714	48.6295640056803
93.6900589812653	93.608919307642	93.3610024980788	92.8917044195583	92.09946070781	90.8007803577253	88.6349380320011	84.7622135322782	76.5699488905685	48.6300355383516
93.6938869266692	93.6125572140515	93.3643175744088	92.8945940118544	92.1018611333619	90.8026699859001	88.6363346388511	84.7631685077352	76.5705483747098	48.6305056273427
93.6977037490052	93.6161845047924	93.3676229029722	92.8974750265011	92.1042543643694	90.8045539029863	88.6377269984397	84.7641205679021	76.5711460255107	48.6309742774667
93.7015094789296	93.619801209623	93.3709185119167	92.9003474891609	92.1066404231149	90.8064321271939	88.6391151246003	84.7650697224002	76.5717418490611	48.6314414935164
93.7053041470326	93.6234073582318	93.3742044293146	92.9032114254175	92.1090193318048	90.8083046766657	88.6404990311121	84.7660159808115	76.572335851426	48.6319072802649
93.7090877838382	93.6270029802375	93.3774806831629	92.9060668607769	92.1113911125697	90.8101715694767	88.6418787317003	84.7669593526795	76.5729280386453	48.6323716424653
93.7128604198044	93.6305881051888	93.3807473013839	92.9089138206668	92.1137557874646	90.8120328236353	88.6432542400362	84.7678998475085	76.573518416734	48.6328345848511
93.7166220853231	93.6341627625652	93.3840043118248	92.9117523304373	92.1161133784692	90.813888457083	88.6446255697377	84.7688374747649	76.5741069916824	48.6332961121363
93.7203728107199	93.6377269817758	93.3872517422581	92.9145824153612	92.1184639074885	90.8157384876951	88.6459927343694	84.7697722438767	76.5746937694562	48.6337562290153
93.724112626254	93.6412807921606	93.3904896203817	92.9174041006341	92.1208073963528	90.817582933281	88.6473557474434	84.770704164234	76.5752787559969	48.6342149401635
93.7278415621185	93.6448242229894	93.3937179738191	92.9202174113745	92.1231438668184	90.8194218115842	88.6487146224187	84.7716332451891	76.5758619572216	48.6346722502366
93.7315596484398	93.6483573034627	93.3969368301195	92.9230223726244	92.1254733405674	90.8212551402831	88.6500693727023	84.7725594960568	76.5764433790232	48.6351281638715
93.7352669152781	93.6518800627111	93.4001462167578	92.9258190093494	92.1277958392085	90.8230829369912	88.6514200116492	84.7734829261145	76.5770230272706	48.6355826856861
93.7389633926269	93.6553925297957	93.4033461611349	92.9286073464387	92.1301113842771	90.8249052192569	88.6527665525626	84.7744035446025	76.5776009078091	48.6360358202794
93.7426491104133	93.658894733708	93.4065366905777	92.9313874087057	92.1324199972355	90.8267220045648	88.6541090086941	84.7753213607245	76.5781770264601	48.6364875722316
93.7463240984978	93.6623867033698	93.4097178323395	92.9341592208881	92.1347216994734	90.8285333103352	88.6554473932444	84.7762363836471	76.5787513890214	48.6369379461043
93.7499883866741	93.6658684676336	93.4128896135998	92.9369228076482	92.1370165123082	90.8303391539246	88.6567817193632	84.7771486225007	76.5793240012675	48.6373869464404
93.7536420046696	93.6693400552821	93.4160520614647	92.939678193573	92.1393044569853	90.8321395526262	88.6581120001496	84.7780580863794	76.5798948689494	48.6378345777645
93.7572849821445	93.6728014950287	93.4192052029669	92.9424254031745	92.1415855546782	90.8339345236704	88.6594382486522	84.7789647843411	76.5804639977953	48.6382808445829
93.7609173486928	93.6762528155174	93.4223490650659	92.9451644608901	92.1438598264891	90.8357240842243	88.6607604778697	84.779868725408	76.5810313935101	48.6387257513836
93.7645391338414	93.6796940453227	93.4254836746481	92.9478953910827	92.1461272934491	90.837508251393	88.6620787007509	84.7807699185665	76.5815970617758	48.6391693026364
93.7681503670505	93.6831252129496	93.4286090585269	92.9506182180409	92.1483879765182	90.8392870422192	88.6633929301952	84.7816683727678	76.5821610082517	48.6396115027934
93.7717510777134	93.6865463468341	93.4317252434431	92.9533329659791	92.1506418965861	90.8410604736838	88.6647031790526	84.7825640969275	76.5827232385746	48.6400523562883
93.7753412951569	93.6899574753428	93.4348322560646	92.9560396590384	92.1528890744722	90.8428285627063	88.666009460124	84.7834570999264	76.5832837583585	48.6404918675375
93.7789210486407	93.6933586267728	93.4379301229869	92.958738321286	92.155129530926	90.8445913261448	88.6673117861618	84.7843473906104	76.5838425731954	48.6409300409393
93.7824903673576	93.6967498293524	93.4410188707332	92.9614289767159	92.1573632866273	90.8463487807964	88.6686101698698	84.7852349777905	76.5843996886547	48.6413668808747
93.7860492804335	93.7001311112405	93.4440985257545	92.964111649249	92.1595903621865	90.8481009433977	88.6699046239033	84.7861198702436	76.5849551102838	48.6418023917069
93.7895978169278	93.703502500527	93.4471691144294	92.9667863627335	92.1618107781449	90.8498478306249	88.6711951608702	84.787002076712	76.5855088436083	48.642236577782
93.7931360058324	93.7068640252327	93.450230663065	92.9694531409449	92.1640245549752	90.8515894590941	88.67248179333	84.7878816059041	76.5860608941317	48.6426694434286
93.7966638760728	93.7102157133094	93.4532831978964	92.9721120075863	92.1662317130813	90.8533258453616	88.6737645337953	84.7887584664942	76.5866112673358	48.6431009929581
93.8001814565073	93.7135575926401	93.4563267450868	92.9747629862888	92.1684322727991	90.8550570059243	88.675043394731	84.789632667123	76.5871599686809	48.6435312306649
93.8036887759274	93.7168896910387	93.4593613307284	92.9774061006114	92.1706262543965	90.8567829572199	88.6763183885553	84.7905042163977	76.5877070036055	48.6439601608263
93.8071858630577	93.7202120362505	93.4623869808417	92.9800413740417	92.1728136780737	90.8585037156269	88.6775895276397	84.791373122892	76.588252377527	48.6443877877027
93.8106727465558	93.7235246559517	93.465403721376	92.9826688299957	92.1749945639637	90.8602192974656	88.6788568243091	84.7922393951467	76.5887960958415	48.6448141155377
93.8141494550124	93.7268275777502	93.4684115782096	92.9852884918182	92.1771689321321	90.8619297189976	88.680120290842	84.7931030416692	76.5893381639239	48.6452391485583
93.8176160169513	93.7301208291848	93.47141057715	92.987900382783	92.179336802578	90.8636349964266	88.6813799394711	84.7939640709344	76.589878587128	48.6456628909746
93.8210724608295	93.7334044377261	93.4744007439336	92.9905045260931	92.1814981952336	90.8653351458984	88.6826357823833	84.7948224913845	76.5904173707867	48.6460853469803
93.824518815037	93.7366784307759	93.4773821042265	92.9931009448811	92.1836531299651	90.8670301835014	88.6838878317199	84.7956783114292	76.5909545202124	48.6465065207527
93.827955107897	93.7399428356677	93.4803546836242	92.9956896622093	92.1858016265725	90.8687201252665	88.6851360995769	84.7965315394458	76.5914900406963	48.6469264164527
93.8313813676656	93.7431976796664	93.4833185076516	92.9982707010698	92.1879437047903	90.8704049871678	88.6863805980053	84.7973821837799	76.5920239375096	48.647345038225
93.8347976225324	93.7464429899688	93.4862736017639	93.0008440843848	92.1900793842874	90.8720847851226	88.6876213390112	84.7982302527446	76.5925562159025	48.6477623901979
93.83820390062	93.7496787937033	93.4892199913459	93.003409835007	92.1922086846673	90.8737595349919	88.688858334556	84.7990757546216	76.5930868811052	48.6481784764839
93.841600229984	93.75290511793	93.4921577017126	93.0059679757197	92.1943316254688	90.8754292525803	88.690091596557	84.799918697661	76.5936159383276	48.6485933011794
93.8449866386135	93.7561219896412	93.4950867581093	93.0085185292369	92.196448226166	90.8770939536365	88.6913211368869	84.8007590900812	76.5941433927595	48.6490068683648
93.8483631544306	93.7593294357607	93.4980071857116	93.0110615182036	92.1985585061684	90.8787536538536	88.692546967375	84.8015969400697	76.5946692495706	48.6494191821048
93.8517298052909	93.7625274831448	93.5009190096258	93.0135969651962	92.2006624848217	90.8804083688693	88.6937690998064	84.8024322557827	76.5951935139108	48.6498302464483
93.855086618983	93.7657161585814	93.5038222548887	93.0161248927225	92.2027601814074	90.8820581142662	88.6949875459229	84.8032650453454	76.59571619091	48.6502400654285
93.858433623229	93.7688954887909	93.506716946468	93.018645323222	92.2048516151433	90.8837029055719	88.6962023174232	84.8040953168524	76.5962372856788	48.6506486430633
93.8617708456841	93.7720655004258	93.5096031092627	93.0211582790659	92.2069368051842	90.8853427582593	88.6974134259628	84.8049230783676	76.5967568033078	48.6510559833547
93.8650983139373	93.775226220071	93.5124807681024	93.0236637825578	92.2090157706213	90.8869776877471	88.6986208831542	84.8057483379244	76.5972747488683	48.6514620902897
93.8684160555104	93.7783776742437	93.5153499477484	93.0261618559334	92.2110885304833	90.8886077093997	88.6998247005675	84.8065711035261	76.5977911274123	48.6518669678397
93.8717240978591	93.7815198893937	93.5182106728933	93.0286525213613	92.213155103736	90.8902328385277	88.7010248897303	84.8073913831457	76.5983059439723	48.6522706199611
93.8750224683725	93.7846528919032	93.5210629681614	93.0311358009424	92.215215509283	90.8918530903881	88.7022214621281	84.8082091847264	76.5988192035621	48.652673050595
93.878311194373	93.7877767080871	93.5239068581086	93.0336117167108	92.2172697659658	90.8934684801843	88.7034144292042	84.8090245161813	76.5993309111758	48.6530742636675
93.8815903031166	93.790891364193	93.5267423672227	93.036080290634	92.2193178925638	90.8950790230668	88.7046038023604	84.8098373853941	76.5998410717891	48.6534742630896
93.884859821793	93.7939968864015	93.5295695199236	93.0385415446124	92.221359907795	90.8966847341331	88.7057895929568	84.8106478002189	76.6003496903584	48.6538730527576
93.8881197775255	93.7970933008258	93.5323883405634	93.0409955004805	92.2233958303158	90.8982856284279	88.7069718123119	84.8114557684804	76.6008567718217	48.6542706365528
93.891370197371	93.8001806335122	93.5351988534265	93.0434421800064	92.2254256787217	90.8998817209437	88.7081504717034	84.8122612979744	76.6013623210981	48.6546670183418
93.8946111083202	93.80325891044	93.5380010827298	93.0458816048921	92.2274494715471	90.9014730266206	88.7093255823679	84.8130643964671	76.6018663430881	48.6550622019766
93.8978425372974	93.8063281575218	93.5407950526229	93.0483137967742	92.2294672272657	90.9030595603468	88.7104971555012	84.8138650716962	76.602368842674	48.6554561912945
93.9010645111609	93.8093884006032	93.5435807871881	93.0507387772233	92.231478964291	90.9046413369589	88.7116652022585	84.8146633313707	76.6028698247195	48.6558489901184
93.9042770567027	93.8124396654634	93.5463583104407	93.053156567745	92.233484700976	90.9062183712419	88.7128297337547	84.8154591831707	76.60336929407	48.6562406022566
93.9074802006489	93.8154819778147	93.549127646329	93.0555671897796	92.2354844556142	90.9077906779296	88.7139907610647	84.8162526347479	76.6038672555529	48.6566310315033
93.9106739696593	93.8185153633032	93.5518888187348	93.0579706647026	92.2374782464388	90.9093582717046	88.7151482952231	84.817043693726	76.6043637139775	48.6570202816381
93.913858390328	93.8215398475084	93.5546418514729	93.0603670138246	92.239466091624	90.910921167199	88.7163023472249	84.8178323677001	76.6048586741348	48.6574083564267
93.917033489183	93.8245554559436	93.557386768292	93.0627562583918	92.2414480092846	90.9124793789942	88.7174529280256	84.8186186642375	76.6053521407983	48.6577952596203
93.9201992926864	93.8275622140558	93.5601235928744	93.0651384195861	92.2434240174762	90.914032921621	88.7186000485412	84.8194025908777	76.6058441187234	48.6581809949564
93.9233558272346	93.8305601472259	93.5628523488361	93.0675135185251	92.2453941341959	90.9155818095605	88.7197437196484	84.8201841551321	76.606334612648	48.6585655661583
93.9265031191581	93.8335492807687	93.5655730597272	93.0698815762626	92.2473583773821	90.9171260572437	88.720883952185	84.8209633644849	76.6068236272922	48.6589489769354
93.9296411947219	93.8365296399333	93.568285749032	93.0722426137888	92.2493167649148	90.9186656790518	88.7220207569501	84.8217402263927	76.6073111673587	48.6593312309833
93.9327700801253	93.8395012499027	93.5709904401691	93.0745966520303	92.251269314616	90.9202006893167	88.7231541447039	84.8225147482845	76.6077972375327	48.6597123319838
93.9358898015019	93.8424641357944	93.5736871564914	93.0769437118502	92.2532160442497	90.9217311023212	88.7242841261683	84.8232869375625	76.608281842482	48.6600922836051
93.9390003849198	93.84541832266	93.5763759212865	93.0792838140489	92.2551569715225	90.9232569322987	88.7254107120269	84.8240568016016	76.6087649868572	48.6604710895016
93.9421018563819	93.8483638354857	93.5790567577769	93.0816169793635	92.2570921140833	90.9247781934341	88.7265339129253	84.8248243477498	76.6092466752917	48.6608487533141
93.9451942418255	93.8513006991923	93.5817296891198	93.0839432284685	92.2590214895238	90.9262948998635	88.7276537394709	84.8255895833284	76.6097269124018	48.6612252786702
93.9482775671226	93.8542289386352	93.5843947384075	93.086262581976	92.2609451153789	90.9278070656749	88.7287702022338	84.826352515632	76.6102057027868	48.6616006691837
93.95135185808	93.8571485786045	93.5870519286676	93.0885750604356	92.2628630091266	90.9293147049078	88.7298833117461	84.8271131519287	76.6106830510291	48.6619749284554
93.9544171404395	93.8600596438253	93.5897012828629	93.090880684335	92.2647751881883	90.930817831554	88.7309930785028	84.82787149946	76.6111589616942	48.6623480600726
93.9574734398775	93.8629621589576	93.5923428238919	93.0931794740997	92.2666816699292	90.9323164595574	88.7320995129616	84.8286275654415	76.611633439331	48.6627200676093
93.9605207820055	93.8658561485964	93.5949765745885	93.0954714500938	92.2685824716582	90.9338106028144	88.7332026255434	84.8293813570623	76.6121064884715	48.6630909546265
93.9635591923702	93.868741637272	93.5976025577228	93.0977566326194	92.2704776106284	90.9353002751742	88.7343024266319	84.8301328814857	76.6125781136313	48.6634607246722
93.9665886964532	93.8716186494498	93.6002207960006	93.1000350419177	92.2723671040373	90.9367854904385	88.7353989265742	84.8308821458491	76.6130483193094	48.6638293812811
93.9696093196713	93.8744872095308	93.6028313120637	93.1023066981685	92.2742509690267	90.9382662623625	88.7364921356812	84.8316291572641	76.6135171099886	48.6641969279751
93.9726210873768	93.8773473418513	93.6054341284905	93.1045716214906	92.2761292226833	90.9397426046544	88.7375820642271	84.8323739228167	76.613984490135	48.6645633682633
93.9756240248571	93.8801990706833	93.6080292677956	93.1068298319424	92.2780018820386	90.9412145309761	88.7386687224501	84.8331164495673	76.6144504641987	48.6649287056417
93.9786181573351	93.8830424202344	93.6106167524301	93.1090813495211	92.2798689640694	90.9426820549428	88.7397521205524	84.8338567445511	76.6149150366136	48.6652929435939
93.9816035099693	93.8858774146481	93.6131966047821	93.1113261941641	92.2817304856978	90.9441451901241	88.7408322687003	84.8345948147779	76.6153782117974	48.6656560855904
93.9845801078536	93.8887040780038	93.6157688471763	93.1135643857483	92.2835864637913	90.9456039500432	88.7419091770245	84.8353306672323	76.6158399941519	48.6660181350894
93.9875479760179	93.8915224343169	93.6183335018746	93.1157959440905	92.2854369151635	90.9470583481777	88.7429828556201	84.836064308874	76.6163003880629	48.6663790955364
93.9905071394274	93.894332507539	93.6208905910759	93.118020888948	92.2872818565737	90.9485083979599	88.744053314547	84.8367957466378	76.6167593979004	48.6667389703642
93.9934576229834	93.8971343215577	93.6234401369167	93.1202392400181	92.2891213047275	90.9499541127766	88.7451205638297	84.8375249874337	76.6172170280185	48.6670977629934
93.9963994515232	93.8999279001974	93.6259821614706	93.122451016939	92.2909552762767	90.9513955059692	88.746184613458	84.8382520381471	76.6176732827557	48.6674554768323
93.9993326498198	93.9027132672185	93.6285166867491	93.1246562392893	92.29278378782	90.9528325908345	88.7472454733866	84.8389769056387	76.6181281664349	48.6678121152764
94.0022572425826	93.9054904463182	93.6310437347015	93.1268549265888	92.2946068559026	90.9542653806244	88.7483031535356	84.8396995967448	76.6185816833632	48.6681676817094
94.005173254457	93.9082594611303	93.6335633272148	93.1290470982982	92.2964244970168	90.9556938885462	88.7493576637904	84.8404201182776	76.6190338378326	48.6685221795026
94.0080807100247	93.9110203352257	93.6360754861143	93.1312327738197	92.298236727602	90.9571181277629	88.7504090140022	84.841138477025	76.6194846341195	48.6688756120152
94.0109796338037	93.9137730921117	93.6385802331634	93.1334119724966	92.3000435640452	90.9585381113931	88.7514572139881	84.8418546797506	76.6199340764848	48.6692279825941
94.0138700502485	93.916517755233	93.6410775900638	93.1355847136144	92.3018450226807	90.9599538525116	88.7525022735307	84.8425687331943	76.6203821691745	48.6695792945746
94.0167519837501	93.9192543479714	93.643567578456	93.1377510163999	92.3036411197907	90.9613653641492	88.753544202379	84.8432806440721	76.6208289164192	48.6699295512795
94.0196254586361	93.9219828936457	93.646050219919	93.1399109000223	92.3054318716053	90.9627726592932	88.7545830102481	84.8439904190761	76.6212743224345	48.6702787560201
94.0224904991708	93.9247034155125	93.6485255359707	93.1420643835929	92.3072172943029	90.9641757508873	88.7556187068197	84.844698064875	76.6217183914207	48.6706269120957
94.0253471295554	93.9274159367654	93.6509935480678	93.1442114861652	92.30899740401	90.965574651832	88.7566513017417	84.8454035881138	76.6221611275635	48.6709740227938
94.0281953739278	93.9301204805359	93.6534542776063	93.1463522267355	92.3107722168019	90.9669693749846	88.7576808046289	84.8461069954141	76.6226025350335	48.67132009139
94.0310352563632	93.9328170698932	93.6559077459215	93.1484866242427	92.3125417487026	90.9683599331595	88.758707225063	84.8468082933745	76.6230426179866	48.6716651211484
94.0338668008735	93.9355057278442	93.658353974288	93.1506146975687	92.3143060156847	90.9697463391284	88.7597305725924	84.8475074885698	76.6234813805637	48.6720091153216
94.036690031408	93.9381864773339	93.6607929839201	93.1527364655385	92.3160650336704	90.9711286056205	88.760750856733	84.8482045875523	76.6239188268913	48.6723520771502
94.0395049718533	93.9408593412451	93.6632247959718	93.1548519469202	92.3178188185307	90.9725067453224	88.7617680869676	84.8488995968511	76.6243549610811	48.6726940098636
94.0423116460332	93.9435243423992	93.6656494315368	93.1569611604257	92.3195673860865	90.9738807708786	88.7627822727466	84.8495925229723	76.6247897872304	48.6730349166797
94.0451100777092	93.9461815035554	93.6680669116492	93.1590641247101	92.3213107521082	90.9752506948916	88.7637934234881	84.8502833723994	76.6252233094219	48.6733748008049
94.04790029058	93.9488308474118	93.670477257283	93.1611608583727	92.323048932316	90.9766165299219	88.7648015485777	84.8509721515932	76.625655531724	48.6737136654342
94.0506823082824	93.9514723966046	93.6728804893524	93.1632513799566	92.3247819423802	90.9779782884884	88.7658066573688	84.8516588669919	76.6260864581907	48.6740515137514
94.0534561543906	93.9541061737091	93.6752766287125	93.1653357079489	92.3265097979213	90.9793359830683	88.7668087591831	84.8523435250113	76.6265160928617	48.6743883489291
94.0562218524169	93.9567322012389	93.6776656961586	93.1674138607812	92.3282325145102	90.9806896260977	88.7678078633101	84.8530261320448	76.6269444397624	48.6747241741286
94.0589794258113	93.9593505016467	93.680047712427	93.1694858568297	92.3299501076685	90.9820392299712	88.7688039790077	84.8537066944635	76.6273715029044	48.6750589924999
94.0617288979622	93.9619610973244	93.682422698195	93.1715517144151	92.3316625928684	90.9833848070428	88.7697971155023	84.8543852186165	76.6277972862849	48.6753928071822
94.0644702921959	93.9645640106029	93.6847906740806	93.173611451803	92.3333699855331	90.9847263696251	88.7707872819887	84.8550617108308	76.6282217938872	48.6757256213035
94.067203631777	93.9671592637521	93.6871516606435	93.1756650872039	92.3350723010369	90.9860639299905	88.7717744876305	84.8557361774113	76.6286450296806	48.6760574379809
94.0699289399086	93.9697468789815	93.6895056783843	93.1777126387738	92.3367695547055	90.9873975003705	88.7727587415599	84.8564086246412	76.6290669976206	48.6763882603203
94.072646239732	93.9723268784403	93.6918527477455	93.1797541246137	92.3384617618161	90.9887270929565	88.7737400528784	84.8570790587819	76.6294877016489	48.676718091417
94.0753555543275	93.9748992842168	93.694192889111	93.1817895627703	92.3401489375973	90.9900527198995	88.7747184306563	84.8577474860732	76.6299071456933	48.6770469343554
94.0780569067136	93.9774641183396	93.6965261228066	93.183818971236	92.3418310972297	90.9913743933106	88.7756938839333	84.8584139127332	76.6303253336681	48.677374792209
94.0807503198479	93.9800214027767	93.6988524691001	93.185842367949	92.3435082558461	90.9926921252609	88.7766664217183	84.8590783449587	76.6307422694738	48.6777016680406
94.0834358166268	93.9825711594363	93.7011719482014	93.1878597707936	92.3451804285311	90.9940059277819	88.7776360529898	84.8597407889251	76.6311579569974	48.6780275649023
94.0861134198856	93.9851134101667	93.7034845802625	93.1898711976003	92.3468476303219	90.9953158128656	88.7786027866959	84.8604012507864	76.6315724001124	48.6783524858357
94.0887831523989	93.9876481767563	93.7057903853779	93.191876666146	92.3485098762082	90.9966217924643	88.7795666317544	84.8610597366757	76.6319856026789	48.6786764338716
94.0914450368803	93.990175480934	93.7080893835847	93.1938761941539	92.3501671811322	90.9979238784913	88.7805275970531	84.8617162527046	76.6323975685436	48.6789994120304
94.0940990959828	93.9926953443691	93.7103815948626	93.1958697992942	92.3518195599893	90.9992220828208	88.7814856914495	84.8623708049642	76.6328083015398	48.6793214233218
94.0967453522988	93.9952077886714	93.7126670391343	93.1978574991837	92.3534670276276	91.0005164172881	88.7824409237717	84.8630233995243	76.6332178054876	48.6796424707454
94.0993838283603	93.9977128353917	93.7149457362652	93.1998393113865	92.3551095988486	91.0018068936895	88.7833933028176	84.863674042434	76.6336260841938	48.6799625572901
94.1020145466388	94.0002105060212	93.717217706064	93.2018152534138	92.3567472884071	91.0030935237829	88.7843428373558	84.864322739722	76.6340331414523	48.6802816859345
94.1046375295457	94.0027008219925	93.7194829682827	93.2037853427239	92.3583801110114	91.0043763192877	88.7852895361253	84.8649694973959	76.6344389810437	48.6805998596469
94.107252799432	94.005183804679	93.7217415426168	93.2057495967229	92.3600080813237	91.0056552918849	88.7862334078358	84.8656143214431	76.6348436067355	48.6809170813854
94.1098603785891	94.0076594753954	93.723993448705	93.2077080327647	92.3616312139597	91.0069304532174	88.7871744611675	84.8662572178305	76.6352470222826	48.6812333540979
94.1124602892481	94.0101278553978	93.7262387061301	93.2096606681506	92.3632495234896	91.00820181489	88.7881127047719	84.8668981925045	76.6356492314266	48.6815486807221
94.1150525535803	94.0125889658836	93.7284773344186	93.2116075201303	92.3648630244373	91.0094693884698	88.7890481472711	84.8675372513914	76.6360502378964	48.6818630641853
94.1176371936975	94.015042827992	93.730709353041	93.2135486059015	92.3664717312815	91.0107331854861	88.7899807972587	84.8681744003973	76.6364500454081	48.6821765074053
94.1202142316519	94.0174894628037	93.732934781412	93.2154839426102	92.3680756584552	91.0119932174305	88.7909106632993	84.8688096454081	76.6368486576651	48.6824890132893
94.1227836894359	94.0199288913414	93.7351536388905	93.217413547351	92.3696748203459	91.0132494957574	88.7918377539289	84.86944299229	76.6372460783581	48.6828005847348
94.1253455889829	94.0223611345696	93.73736594478	93.219337437167	92.3712692312965	91.0145020318838	88.792762077655	84.8700744468889	76.6376423111652	48.6831112246293
94.1278999521668	94.0247862133951	93.7395717183282	93.2212556290503	92.3728589056043	91.0157508371896	88.7936836429568	84.8707040150312	76.6380373597518	48.6834209358505
94.1304468008025	94.0272041486666	93.7417709787281	93.2231681399418	92.3744438575221	91.0169959230177	88.7946024582851	84.8713317025233	76.6384312277709	48.6837297212659
94.1329861566459	94.0296149611754	93.7439637451171	93.2250749867315	92.376024101258	91.0182373006741	88.7955185320626	84.8719575151521	76.638823918863	48.6840375837337
94.1355180413938	94.0320186716551	93.7461500365778	93.2269761862588	92.3775996509754	91.0194749814283	88.796431872684	84.872581458685	76.6392154366562	48.6843445261018
94.1380424766843	94.0344153007821	93.748329872138	93.2288717553125	92.3791705207936	91.0207089765131	88.797342488516	84.8732035388696	76.6396057847663	48.6846505512088
94.1405594840968	94.0368048691753	93.7505032707706	93.2307617106308	92.3807367247874	91.0219392971249	88.7982503878975	84.8738237614345	76.6399949667967	48.6849556618833
94.1430690851523	94.0391873973964	93.7526702513941	93.232646068902	92.3822982769879	91.0231659544239	88.7991555791398	84.8744421320888	76.6403829863386	48.6852598609445
94.145571301313	94.0415629059503	93.7548308328725	93.2345248467641	92.3838551913819	91.024388959534	88.8000580705264	84.8750586565222	76.640769846971	48.6855631512019
94.1480661539831	94.0439314152848	93.7569850340157	93.236398060805	92.3854074819128	91.0256083235432	88.8009578703136	84.8756733404055	76.6411555522609	48.6858655354553
94.1505536645082	94.046292945791	93.7591328735793	93.2382657275632	92.3869551624803	91.0268240575038	88.8018549867301	84.8762861893902	76.6415401057629	48.6861670164952
94.1530338541762	94.0486475178033	93.7612743702649	93.2401278635271	92.3884982469405	91.0280361724322	88.8027494279776	84.8768972091092	76.6419235110199	48.6864675971026
94.1555067442166	94.0509951515996	93.7634095427203	93.2419844851359	92.3900367491065	91.0292446793092	88.8036412022305	84.8775064051759	76.6423057715626	48.6867672800488
94.1579723558014	94.0533358674014	93.7655384095396	93.2438356087795	92.3915706827481	91.0304495890804	88.8045303176361	84.8781137831854	76.6426868909099	48.6870660680961
94.1604307100445	94.0556696853738	93.7676609892634	93.2456812507986	92.393100061592	91.0316509126557	88.8054167823151	84.8787193487137	76.6430668725687	48.6873639639972
94.1628818280024	94.057996625626	93.7697773003788	93.2475214274845	92.3946248993224	91.0328486609103	88.8063006043611	84.8793231073184	76.6434457200342	48.6876609704955
94.1653257306739	94.0603167082109	93.7718873613196	93.2493561550802	92.3961452095805	91.034042844684	88.807181791841	84.8799250645382	76.6438234367896	48.6879570903252
94.1677624390006	94.0626299531257	93.7739911904664	93.2511854497796	92.3976610059653	91.0352334747819	88.8080603527954	84.8805252258935	76.6442000263067	48.6882523262112
94.1701919738664	94.0649363803117	93.776088806147	93.2530093277281	92.399172302033	91.0364205619741	88.8089362952382	84.8811235968863	76.6445754920454	48.6885466808693
94.1726143560985	94.0672360096546	93.7781802266363	93.2548278050228	92.4006791112978	91.0376041169964	88.8098096271569	84.8817201829999	76.6449498374539	48.688840157006
94.1750296064668	94.0695288609847	93.7802654701562	93.2566408977122	92.4021814472319	91.0387841505498	88.8106803565129	84.8823149896998	76.6453230659691	48.6891327573187
94.1774377456841	94.0718149540767	93.7823445548764	93.258448621797	92.4036793232653	91.039960673301	88.8115484912413	84.8829080224329	76.6456951810161	48.689424484496
94.1798387944067	94.0740943086501	93.7844174989139	93.2602509932298	92.4051727527865	91.0411336958826	88.8124140392511	84.8834992866281	76.6460661860086	48.6897153412171
94.1822327732341	94.0763669443695	93.7864843203334	93.2620480279154	92.4066617491421	91.042303228893	88.8132770084255	84.8840887876963	76.646436084349	48.6900053301524
94.1846197027089	94.078632880844	93.7885450371478	93.2638397417107	92.4081463256373	91.0434692828964	88.8141374066219	84.8846765310303	76.6468048794281	48.6902944539633
94.1869996033178	94.0808921376284	93.7905996673174	93.2656261504254	92.4096264955359	91.0446318684236	88.8149952416717	84.8852625220051	76.6471725746255	48.6905827153022
94.1893724954906	94.0831447342222	93.7926482287511	93.2674072698216	92.4111022720606	91.0457909959711	88.8158505213809	84.8858467659777	76.6475391733096	48.6908701168127
94.1917383996011	94.0853906900707	93.7946907393058	93.2691831156141	92.4125736683927	91.0469466760024	88.8167032535297	84.8864292682876	76.6479046788372	48.6911566611296
94.1940973359672	94.0876300245644	93.7967272167868	93.2709537034708	92.4140406976729	91.048098918947	88.8175534458732	84.8870100342563	76.6482690945544	48.6914423508787
94.1964493248504	94.0898627570396	93.7987576789481	93.2727190490123	92.4155033730009	91.0492477352014	88.818401106141	84.8875890691878	76.6486324237956	48.6917271886772
94.1987943864566	94.0920889067783	93.8007821434922	93.2744791678129	92.4169617074359	91.0503931351286	88.8192462420373	84.8881663783688	76.6489946698846	48.6920111771335
94.2057882088358	94.0987280515841	93.80681972768	93.2797283188088	92.4213107953666	91.0538089400833	88.8217665801649	84.889888004011	76.6500749423082	48.6928580724029
