# Supplementary material for: A model of aerosol evaporation kinetics in a thermodenuder
Source: Copernicus journal article supplement (doi:10.5194/amt-3-579-2010), 2010-05-11
Supplement: Supplementary file 1 [file amt-3-579-2010-supplement.zip › Figure 6c Data.txt]

Distance
0
0.0523885021010821
0.104777004202164
0.157165506303246
0.209554008404328
0.26194251050541
0.314331012606492
0.366719514707574
0.419108016808657
0.471496518909739
0.523885021010821
0.576273523111903
0.628662025212985
0.681050527314067
0.733439029415149
0.785827531516231
0.838216033617313
0.890604535718395
0.942993037819477
0.995381539920559
1.04777004202164
1.10015854412272
1.15254704622381
1.20493554832489
1.25732405042597
1.30971255252705
1.36210105462813
1.41448955672922
1.4668780588303
1.51926656093138
1.57165506303246
1.62404356513354
1.67643206723463
1.72882056933571
1.78120907143679
1.83359757353787
1.88598607563895
1.93837457774004
1.99076307984112
2.0431515819422
2.09554008404328
2.14792858614436
2.20031708824545
2.25270559034653
2.30509409244761
2.35748259454869
2.40987109664978
2.46225959875086
2.51464810085194
2.56703660295302
2.6194251050541
2.67181360715519
2.72420210925627
2.77659061135735
2.82897911345843
2.88136761555951
2.9337561176606
2.98614461976168
3.03853312186276
3.09092162396384
3.14331012606492
3.19569862816601
3.24808713026709
3.30047563236817
3.35286413446925
3.40525263657033
3.45764113867142
3.5100296407725
3.56241814287358
3.61480664497466
3.66719514707574
3.71958364917683
3.77197215127791
3.82436065337899
3.87674915548007
3.92913765758115
3.98152615968224
4.03391466178332
4.0863031638844
4.13869166598548
4.19108016808657
4.24346867018765
4.29585717228873
4.34824567438981
4.40063417649089
4.45302267859198
4.50541118069306
4.55779968279414
4.61018818489522
4.6625766869963
4.71496518909739
4.76735369119847
4.81974219329955
4.87213069540063
4.92451919750171
4.9769076996028
5.02929620170388
5.08168470380496
5.13407320590604
5.18646170800712
5.23885021010821
5.29123871220929
5.34362721431037
5.39601571641145
5.44840421851254
5.50079272061362
5.5531812227147
5.60556972481578
5.65795822691686
5.71034672901795
5.76273523111903
5.81512373322011
5.86751223532119
5.91990073742227
5.97228923952336
6.02467774162444
6.07706624372552
6.1294547458266
6.18184324792768
6.23423175002877
6.28662025212985
6.33900875423093
6.39139725633201
6.44378575843309
6.49617426053418
6.54856276263526
6.60095126473634
6.65333976683742
6.7057282689385
6.75811677103959
6.81050527314067
6.86289377524175
6.91528227734283
6.96767077944391
7.020059281545
7.07244778364608
7.12483628574716
7.17722478784824
7.22961328994933
7.28200179205041
7.33439029415149
7.38677879625257
7.43916729835365
7.49155580045474
7.54394430255582
7.5963328046569
7.64872130675798
7.70110980885906
7.75349831096015
7.80588681306123
7.85827531516231
7.91066381726339
7.96305231936447
8.01544082146556
8.06782932356664
8.12021782566772
8.1726063277688
8.22499482986989
8.27738333197097
8.32977183407205
8.38216033617313
8.43454883827421
8.4869373403753
8.53932584247638
8.59171434457746
8.64410284667854
8.69649134877962
8.74887985088071
8.80126835298179
8.85365685508287
8.90604535718395
8.95843385928503
9.01082236138611
9.0632108634872
9.11559936558828
9.16798786768936
9.22037636979044
9.27276487189152
9.32515337399261
9.37754187609369
9.42993037819477
9.48231888029585
9.53470738239694
9.58709588449802
9.6394843865991
9.69187288870018
9.74426139080126
9.79664989290235
9.84903839500343
9.90142689710451
9.95381539920559
10.0062039013067
10.0585924034078
10.1109809055088
10.1633694076099
10.215757909711
10.2681464118121
10.3205349139132
10.3729234160142
10.4253119181153
10.4777004202164
10.5300889223175
10.5824774244186
10.6348659265197
10.6872544286207
10.7396429307218
10.7920314328229
10.844419934924
10.8968084370251
10.9491969391262
11.0015854412272
11.0539739433283
11.1063624454294
11.1587509475305
11.2111394496316
11.2635279517326
11.3159164538337
11.3683049559348
11.4206934580359
11.473081960137
11.5254704622381
11.5778589643391
11.6302474664402
11.6826359685413
11.7350244706424
11.7874129727435
11.8398014748445
11.8921899769456
11.9445784790467
11.9969669811478
12.0493554832489
12.10174398535
12.154132487451
12.2065209895521
12.2589094916532
12.3112979937543
12.3636864958554
12.4160749979564
12.4684635000575
12.5208520021586
12.5732405042597
12.6256290063608
12.6780175084619
12.7304060105629
12.782794512664
12.8351830147651
12.8875715168662
12.9399600189673
12.9923485210684
13.0447370231694
13.0971255252705
13.1495140273716
13.2019025294727
13.2542910315738
13.3066795336748
13.3590680357759
13.411456537877
13.4638450399781
13.5162335420792
13.5686220441803
13.6210105462813
13.6733990483824
13.7257875504835
13.7781760525846
13.8305645546857
13.8829530567867
13.9353415588878
13.9877300609889
14.04011856309
14.0925070651911
14.1448955672922
14.1972840693932
14.2496725714943
14.3020610735954
14.3544495756965
14.4068380777976
14.4592265798987
14.5116150819997
14.5640035841008
14.6163920862019
14.668780588303
14.7211690904041
14.7735575925051
14.8259460946062
14.8783345967073
14.9307230988084
14.9831116009095
15.0355001030106
15.0878886051116
15.1402771072127
15.1926656093138
15.2450541114149
15.297442613516
15.349831115617
15.4022196177181
15.4546081198192
15.5069966219203
15.5593851240214
15.6117736261225
15.6641621282235
15.7165506303246
15.7689391324257
15.8213276345268
15.8737161366279
15.9261046387289
15.97849314083
16.0308816429311
16.0832701450322
16.1356586471333
16.1880471492344
16.2404356513354
16.2928241534365
16.3452126555376
16.3976011576387
16.4499896597398
16.5023781618408
16.5547666639419
16.607155166043
16.6595436681441
16.7119321702452
16.7643206723463
16.8167091744473
16.8690976765484
16.9214861786495
16.9738746807506
17.0262631828517
17.0786516849528
17.1310401870538
17.1834286891549
17.235817191256
17.2882056933571
17.3405941954582
17.3929826975592
17.4453711996603
17.4977597017614
17.5501482038625
17.6025367059636
17.6549252080647
17.7073137101657
17.7597022122668
17.8120907143679
17.864479216469
17.9168677185701
17.9692562206711
18.0216447227722
18.0740332248733
18.1264217269744
18.1788102290755
18.2311987311766
18.2835872332776
18.3359757353787
18.3883642374798
18.4407527395809
18.493141241682
18.545529743783
18.5979182458841
18.6503067479852
18.7026952500863
18.7550837521874
18.8074722542885
18.8598607563895
18.9122492584906
18.9646377605917
19.0170262626928
19.0694147647939
19.121803266895
19.174191768996
19.2265802710971
19.2789687731982
19.3313572752993
19.3837457774004
19.4361342795014
19.4885227816025
19.5409112837036
19.5932997858047
19.6456882879058
19.6980767900069
19.7504652921079
19.802853794209
19.8552422963101
19.9076307984112
19.9600193005123
20.0124078026133
20.0647963047144
20.1171848068155
20.1695733089166
20.2219618110177
20.2743503131188
20.3267388152198
20.3791273173209
20.431515819422
20.4839043215231
20.5362928236242
20.5886813257253
20.6410698278263
20.6934583299274
20.7458468320285
20.7982353341296
20.8506238362307
20.9030123383317
20.9554008404328
21.0077893425339
21.060177844635
21.1125663467361
21.1649548488372
21.2173433509382
21.2697318530393
21.3221203551404
21.3745088572415
21.4268973593426
21.4792858614436
21.5316743635447
21.5840628656458
21.6364513677469
21.688839869848
21.7412283719491
21.7936168740501
21.8460053761512
21.8983938782523
21.9507823803534
22.0031708824545
22.0555593845556
22.1079478866566
22.1603363887577
22.2127248908588
22.2651133929599
22.317501895061
22.369890397162
22.4222788992631
22.4746674013642
22.5270559034653
22.5794444055664
22.6318329076675
22.6842214097685
22.7366099118696
22.7889984139707
22.8413869160718
22.8937754181729
22.9461639202739
22.998552422375
23.0509409244761
23.1033294265772
23.1557179286783
23.2081064307794
23.2604949328804
23.3128834349815
23.3652719370826
23.4176604391837
23.4700489412848
23.5224374433859
23.5748259454869
23.627214447588
23.6796029496891
23.7319914517902
23.7843799538913
23.8367684559923
23.8891569580934
23.9415454601945
23.9939339622956
24.0463224643967
24.0987109664977
24.1510994685988
24.2034879706999
24.255876472801
24.3082649749021
24.3606534770032
24.4130419791042
24.4654304812053
24.5178189833064
24.5702074854075
24.6225959875086
24.6749844896097
24.7273729917107
24.7797614938118
24.8321499959129
24.884538498014
24.9369270001151
24.9893155022161
25.0417040043172
25.0940925064183
25.1464810085194
25.1988695106205
25.2512580127216
25.3036465148226
25.3560350169237
25.4084235190248
25.4608120211259
25.513200523227
25.5655890253281
25.6179775274291
25.6703660295302
25.7227545316313
25.7751430337324
25.8275315358335
25.8799200379345
25.9323085400356
25.9846970421367
26.0370855442378
26.0894740463389
26.14186254844
26.194251050541
26.2466395526421
26.2990280547432
26.3514165568443
26.4038050589454
26.4561935610464
26.5085820631475
26.5609705652486
26.6133590673497
26.6657475694508
26.7181360715519
26.7705245736529
26.822913075754
26.8753015778551
26.9276900799562
26.9800785820573
27.0324670841583
27.0848555862594
27.1372440883605
27.1896325904616
27.2420210925627
27.2944095946638
27.3467980967648
27.3991865988659
27.451575100967
27.5039636030681
27.5563521051692
27.6087406072702
27.6611291093713
27.7135176114724
27.7659061135735
27.8182946156746
27.8706831177757
27.9230716198767
27.9754601219778
28.0278486240789
28.08023712618
28.1326256282811
28.1850141303822
28.2374026324832
28.2897911345843
28.3421796366854
28.3945681387865
28.4469566408876
28.4993451429886
28.5517336450897
28.6041221471908
28.6565106492919
28.708899151393
28.7612876534941
28.8136761555951
28.8660646576962
28.9184531597973
28.9708416618984
29.0232301639995
29.0756186661005
29.1280071682016
29.1803956703027
29.2327841724038
29.2851726745049
29.337561176606
29.389949678707
29.4423381808081
29.4947266829092
29.5471151850103
29.5995036871114
29.6518921892124
29.7042806913135
29.7566691934146
29.8090576955157
29.8614461976168
29.9138346997179
29.9662232018189
30.01861170392
30.0710002060211
30.1233887081222
30.1757772102233
30.2281657123244
30.2805542144254
30.3329427165265
30.3853312186276
30.4377197207287
30.4901082228298
30.5424967249308
30.5948852270319
30.647273729133
30.6996622312341
30.7520507333352
30.8044392354363
30.8568277375373
30.9092162396384
30.9616047417395
31.0139932438406
31.0663817459417
31.1187702480428
31.1711587501438
31.2235472522449
31.275935754346
31.3283242564471
31.3807127585482
31.4331012606492
31.4854897627503
31.5378782648514
31.5902667669525
31.6426552690536
31.6950437711547
31.7474322732557
31.7998207753568
31.8522092774579
31.904597779559
31.9569862816601
32.0093747837611
32.0617632858622
32.1141517879633
32.1665402900644
32.2189287921655
32.2713172942666
32.3237057963676
32.3760942984687
32.4284828005698
32.4808713026709
32.533259804772
32.585648306873
32.6380368089741
32.6904253110752
32.7428138131763
32.7952023152774
32.8475908173785
32.8999793194795
32.9523678215806
33.0047563236817
33.0571448257828
33.1095333278839
33.1619218299849
33.214310332086
33.2666988341871
33.3190873362882
33.3714758383893
33.4238643404904
33.4762528425914
33.5286413446925
33.5810298467936
33.6334183488947
33.6858068509958
33.7381953530968
33.7905838551979
33.842972357299
33.8953608594001
33.9477493615012
34.0001378636023
34.0525263657033
34.1049148678044
34.1573033699055
34.2096918720066
34.2620803741077
34.3144688762088
34.3668573783098
34.4192458804109
34.471634382512
34.5240228846131
34.5764113867142
34.6287998888153
34.6811883909163
34.7335768930174
34.7859653951185
34.8383538972196
34.8907423993207
34.9431309014217
34.9955194035228
35.0479079056239
35.100296407725
35.1526849098261
35.2050734119271
35.2574619140282
35.3098504161293
35.3622389182304
35.4146274203315
35.4670159224326
35.5194044245336
35.5717929266347
35.6241814287358
35.6765699308369
35.728958432938
35.781346935039
35.8337354371401
35.8861239392412
35.9385124413423
35.9909009434434
36.0432894455445
36.0956779476455
36.1480664497466
36.2004549518477
36.2528434539488
36.3052319560499
36.357620458151
36.410008960252
36.4623974623531
36.5147859644542
36.5671744665553
36.6195629686564
36.6719514707574
36.7243399728585
36.7767284749596
36.8291169770607
36.8815054791618
36.9338939812629
36.9862824833639
37.038670985465
37.0910594875661
37.1434479896672
37.1958364917683
37.2482249938693
37.3006134959704
37.3530019980715
37.4053905001726
37.4577790022737
37.5101675043748
37.5625560064758
37.6149445085769
37.667333010678
37.7197215127791
37.7721100148802
37.8244985169813
37.8768870190823
37.9292755211834
37.9816640232845
38.0340525253856
38.0864410274867
38.1388295295877
38.1912180316888
38.2436065337899
38.295995035891
38.3483835379921
38.4007720400932
38.4531605421942
38.5055490442953
38.5579375463964
38.6103260484975
38.6627145505986
38.7151030526996
38.7674915548007
38.8198800569018
38.8722685590029
38.924657061104
38.9770455632051
39.0294340653061
39.0818225674072
39.1342110695083
39.1865995716094
39.2389880737105
39.2913765758115
39.3437650779126
39.3961535800137
39.4485420821148
39.5009305842159
39.553319086317
39.605707588418
39.6580960905191
39.7104845926202
39.7628730947213
39.8152615968224
39.8676500989234
39.9200386010245
39.9724271031256
40.0248156052267
40.0772041073278
40.1295926094289
40.1819811115299
40.234369613631
40.2867581157321
40.3391466178332
40.3915351199343
40.4439236220354
40.4963121241364
40.5487006262375
40.6010891283386
40.6534776304397
40.7058661325408
40.7582546346419
40.8106431367429
40.863031638844
40.9154201409451
40.9678086430462
41.0201971451473
41.0725856472483
41.1249741493494
41.1773626514505
41.2297511535516
41.2821396556527
41.3345281577538
41.3869166598548
41.4393051619559
41.491693664057
41.5440821661581
41.5964706682592
41.6488591703602
41.7012476724613
41.7536361745624
41.8060246766635
41.8584131787646
41.9108016808657
41.9631901829667
42.0155786850678
42.0679671871689
42.12035568927
42.1727441913711
42.2251326934721
42.2775211955732
42.3299096976743
42.3822981997754
42.4346867018765
42.4870752039776
42.5394637060786
42.5918522081797
42.6442407102808
42.6966292123819
42.749017714483
42.801406216584
42.8537947186851
42.9061832207862
42.9585717228873
43.0109602249884
43.0633487270895
43.1157372291905
43.1681257312916
43.2205142333927
43.2729027354938
43.3252912375949
43.3776797396959
43.430068241797
43.4824567438981
43.5348452459992
43.5872337481003
43.6396222502014
43.6920107523024
43.7443992544035
43.7967877565046
43.8491762586057
43.9015647607068
43.9539532628079
44.0063417649089
44.05873026701
44.1111187691111
44.1635072712122
44.2158957733133
44.2682842754143
44.3206727775154
44.3730612796165
44.4254497817176
44.4778382838187
44.5302267859198
44.5826152880208
44.6350037901219
44.687392292223
44.7397807943241
44.7921692964252
44.8445577985262
44.8969463006273
44.9493348027284
45.0017233048295
45.0541118069306
45.1065003090317
45.1588888111327
45.2112773132338
45.2636658153349
45.316054317436
45.3684428195371
45.4208313216381
45.4732198237392
45.5256083258403
45.5779968279414
45.6303853300425
45.6827738321436
45.7351623342446
45.7875508363457
45.8399393384468
45.8923278405479
45.944716342649
45.9971048447501
46.0494933468511
46.1018818489522
46.1542703510533
46.2066588531544
46.2590473552555
46.3114358573565
46.3638243594576
46.4162128615587
46.4686013636598
46.5209898657609
46.573378367862
46.625766869963
46.6781553720641
46.7305438741652
46.7829323762663
46.8353208783674
46.8877093804685
46.9400978825695
46.9924863846706
47.0448748867717
47.0972633888728
47.1496518909739
47.2020403930749
47.254428895176
47.3068173972771
47.3592058993782
47.4115944014793
47.4639829035804
47.5163714056814
47.5687599077825
47.6211484098836
47.6735369119847
47.7259254140858
47.7783139161868
47.8307024182879
47.883090920389
47.9354794224901
47.9878679245912
48.0402564266923
48.0926449287933
48.1450334308944
48.1974219329955
48.2498104350966
48.3021989371977
48.3545874392987
48.4069759413998
48.4593644435009
48.511752945602
48.5641414477031
48.6165299498042
48.6689184519052
48.7213069540063
48.7736954561074
48.8260839582085
48.8784724603096
48.9308609624106
48.9832494645117
49.0356379666128
49.0880264687139
49.140414970815
49.1928034729161
49.2451919750171
49.2975804771182
49.3499689792193
49.4023574813204
49.4547459834215
49.5071344855226
49.5595229876236
49.6119114897247
49.6642999918258
49.7166884939269
49.769076996028
49.821465498129
49.8738540002301
49.9262425023312
49.9786310044323
50.0310195065334
50.0834080086345
50.1357965107355
50.1881850128366
50.2405735149377
50.2929620170388
50.3453505191399
50.397739021241
50.450127523342
50.5025160254431
50.5549045275442
50.6072930296453
50.6596815317464
50.7120700338474
50.7644585359485
50.8168470380496
50.8692355401507
50.9216240422518
50.9740125443529
51.0264010464539
51.078789548555
51.1311780506561
51.1835665527572
51.2359550548583
51.2883435569593
51.3407320590604
51.3931205611615
51.4455090632626
51.4978975653637
51.5502860674648
51.6026745695658
51.6550630716669
51.707451573768
51.7598400758691
51.8122285779702
51.8646170800712
51.9170055821723
51.9693940842734
52.0217825863745
52.0741710884756
52.1265595905767
52.1789480926777
52.2313365947788
52.2837250968799
52.336113598981
52.3885021010821
52.4408906031831
52.4932791052842
52.5456676073853
52.5980561094864
52.6504446115875
52.7028331136886
52.7552216157896
52.8076101178907
52.8599986199918
52.9123871220929
52.964775624194
53.017164126295
53.0695526283961
53.1219411304972
53.1743296325983
53.2267181346994
53.2791066368005
53.3314951389015
53.3838836410026
53.4362721431037
53.4886606452048
53.5410491473059
53.593437649407
53.645826151508
53.6982146536091
53.7506031557102
53.8029916578113
53.8553801599124
53.9077686620134
53.9601571641145
54.0125456662156
54.0649341683167
54.1173226704178
54.1697111725189
54.2220996746199
54.274488176721
54.3268766788221
54.3792651809232
54.4316536830243
54.4840421851253
54.5364306872264
54.5888191893275
54.6412076914286
54.6935961935297
54.7459846956308
54.7983731977318
54.8507616998329
54.903150201934
54.9555387040351
55.0079272061362
55.0603157082372
55.1127042103383
55.1650927124394
55.2174812145405
55.2698697166416
55.3222582187427
55.3746467208437
55.4270352229448
55.4794237250459
55.531812227147
55.5842007292481
55.6365892313492
55.6889777334502
55.7413662355513
55.7937547376524
55.8461432397535
55.8985317418546
55.9509202439557
56.0033087460567
56.0556972481578
56.1080857502589
56.16047425236
56.2128627544611
56.2652512565621
56.3176397586632
56.3700282607643
56.4224167628654
56.4748052649665
56.5271937670676
56.5795822691686
56.6319707712697
56.6843592733708
56.7367477754719
56.789136277573
56.841524779674
56.8939132817751
56.9463017838762
56.9986902859773
57.0510787880784
57.1034672901795
57.1558557922805
57.2082442943816
57.2606327964827
57.3130212985838
57.3654098006849
57.4177983027859
57.470186804887
57.5225753069881
57.5749638090892
57.6273523111903
57.6797408132914
57.7321293153924
57.7845178174935
57.8369063195946
57.8892948216957
57.9416833237968
57.9940718258979
58.0464603279989
58.0988488301
58.1512373322011
58.2036258343022
58.2560143364033
58.3084028385043
58.3607913406054
58.4131798427065
58.4655683448076
58.5179568469087
58.5703453490097
58.6227338511108
58.6751223532119
58.727510855313
58.7798993574141
58.8322878595152
58.8846763616162
58.9370648637173
58.9894533658184
59.0418418679195
59.0942303700206
59.1466188721216
59.1990073742227
59.2513958763238
59.3037843784249
59.356172880526
59.4085613826271
59.4609498847281
59.5133383868292
59.5657268889303
59.6181153910314
59.6705038931325
59.7228923952336
59.7752808973346
59.8276693994357
59.8800579015368
59.9324464036379
59.984834905739
60.03722340784
60.0896119099411
60.1420004120422
60.1943889141433
60.2467774162444
60.2991659183455
60.3515544204465
60.4039429225476
60.4563314246487
60.5087199267498
60.5611084288509
60.6134969309519
60.665885433053
60.7182739351541
60.7706624372552
60.8230509393563
60.8754394414574
60.9278279435584
60.9802164456595
61.0326049477606
61.0849934498617
61.1373819519628
61.1897704540639
61.2421589561649
61.294547458266
61.3469359603671
61.3993244624682
61.4517129645693
61.5041014666703
61.5564899687714
61.6088784708725
61.6612669729736
61.7136554750747
61.7660439771758
61.8184324792768
61.8708209813779
61.923209483479
61.9755979855801
62.0279864876812
62.0803749897822
62.1327634918833
62.1851519939844
62.2375404960855
62.2899289981866
62.3423175002877
62.3947060023887
62.4470945044898
62.4994830065909
62.551871508692
62.6042600107931
62.6566485128942
62.7090370149952
62.7614255170963
62.8138140191974
62.8662025212985
62.9185910233996
62.9709795255006
63.0233680276017
63.0757565297028
63.1281450318039
63.180533533905
63.2329220360061
63.2853105381071
63.3376990402082
63.3900875423093
63.4424760444104
63.4948645465115
63.5472530486126
63.5996415507136
63.6520300528147
63.7044185549158
63.7568070570169
63.809195559118
63.861584061219
63.9139725633201
63.9663610654212
64.0187495675223
64.0711380696234
64.1235265717245
64.1759150738255
64.2283035759266
64.2806920780277
64.3330805801288
64.3854690822299
64.4378575843309
64.490246086432
64.5426345885331
64.5950230906342
64.6474115927353
64.6998000948364
64.7521885969374
64.8045770990385
64.8569656011396
64.9093541032407
64.9617426053418
65.0141311074428
65.0665196095439
65.118908111645
65.1712966137461
65.2236851158472
65.2760736179482
65.3284621200493
65.3808506221504
65.4332391242515
65.4856276263526
65.5380161284537
65.5904046305547
65.6427931326558
65.6951816347569
65.747570136858
65.7999586389591
65.8523471410602
65.9047356431612
65.9571241452623
66.0095126473634
66.0619011494645
66.1142896515656
66.1666781536667
66.2190666557677
66.2714551578688
66.3238436599699
66.376232162071
66.4286206641721
66.4810091662731
66.5333976683742
66.5857861704753
66.6381746725764
66.6905631746775
66.7429516767785
66.7953401788796
66.8477286809807
66.9001171830818
66.9525056851829
67.004894187284
67.057282689385
67.1096711914861
67.1620596935872
67.2144481956883
67.2668366977894
67.3192251998905
67.3716137019915
67.4240022040926
67.4763907061937
67.5287792082948
67.5811677103959
67.6335562124969
67.685944714598
67.7383332166991
67.7907217188002
67.8431102209013
67.8954987230024
67.9478872251034
68.0002757272045
68.0526642293056
68.1050527314067
68.1574412335078
68.2098297356088
68.2622182377099
68.314606739811
68.3669952419121
68.4193837440132
68.4717722461143
68.5241607482154
68.5765492503164
68.6289377524175
68.6813262545186
68.7337147566197
68.7861032587208
68.8384917608218
68.8908802629229
68.943268765024
68.9956572671251
69.0480457692262
69.1004342713272
69.1528227734283
69.2052112755294
69.2575997776305
69.3099882797316
69.3623767818327
69.4147652839337
69.4671537860348
69.5195422881359
69.571930790237
69.6243192923381
69.6767077944392
69.7290962965402
69.7814847986413
69.8338733007424
69.8862618028435
69.9386503049446
69.9910388070456
70.0434273091467
70.0958158112478
70.1482043133489
70.20059281545
70.2529813175511
70.3053698196521
70.3577583217532
70.4101468238543
70.4625353259554
70.5149238280565
70.5673123301575
70.6197008322586
70.6720893343597
70.7244778364608
70.7768663385619
70.829254840663
70.881643342764
70.9340318448651
70.9864203469662
71.0388088490673
71.0911973511684
71.1435858532694
71.1959743553705
71.2483628574716
71.3007513595727
71.3531398616738
71.4055283637749
71.4579168658759
71.510305367977
71.5626938700781
71.6150823721792
71.6674708742803
71.7198593763814
71.7722478784824
71.8246363805835
71.8770248826846
71.9294133847857
71.9818018868868
72.0341903889878
72.0865788910889
72.13896739319
72.1913558952911
72.2437443973922
72.2961328994932
72.3485214015943
72.4009099036954
72.4532984057965
72.5056869078976
72.5580754099987
72.6104639120997
72.6628524142008
72.7152409163019
72.767629418403
72.8200179205041
72.8724064226052
72.9247949247062
72.9771834268073
73.0295719289084
73.0819604310095
73.1343489331106
73.1867374352116
73.2391259373127
73.2915144394138
73.3439029415149
73.396291443616
73.4486799457171
73.5010684478181
73.5534569499192
73.6058454520203
73.6582339541214
73.7106224562225
73.7630109583235
73.8153994604246
73.8677879625257
73.9201764646268
73.9725649667279
74.024953468829
74.07734197093
74.1297304730311
74.1821189751322
74.2345074772333
74.2868959793344
74.3392844814355
74.3916729835365
74.4440614856376
74.4964499877387
74.5488384898398
74.6012269919409
74.6536154940419
74.706003996143
74.7583924982441
74.8107810003452
74.8631695024463
74.9155580045473
74.9679465066484
75.0203350087495
75.0727235108506
75.1251120129517
75.1775005150528
75.2298890171539
75.2822775192549
75.334666021356
75.3870545234571
75.4394430255582
75.4918315276593
75.5442200297603
75.5966085318614
75.6489970339625
75.7013855360636
75.7537740381647
75.8061625402658
75.8585510423668
75.9109395444679
75.963328046569
76.0157165486701
76.0681050507712
76.1204935528722
76.1728820549733
76.2252705570744
76.2776590591755
76.3300475612766
76.3824360633777
76.4348245654787
76.4872130675798
76.5396015696809
76.591990071782
76.6443785738831
76.6967670759841
76.7491555780852
76.8015440801863
76.8539325822874
76.9063210843885
76.9587095864896
77.0110980885906
77.0634865906917
77.1158750927928
77.1682635948939
77.220652096995
77.273040599096
77.3254291011971
77.3778176032982
77.4302061053993
77.4825946075004
77.5349831096015
77.5873716117025
77.6397601138036
77.6921486159047
77.7445371180058
77.7969256201069
77.8493141222079
77.901702624309
77.9540911264101
78.0064796285112
78.0588681306123
78.1112566327134
78.1636451348144
78.2160336369155
78.2684221390166
78.3208106411177
78.3731991432188
78.4255876453199
78.4779761474209
78.530364649522
78.5827531516231
78.6351416537242
78.6875301558253
78.7399186579263
78.7923071600274
78.8446956621285
78.8970841642296
78.9494726663307
79.0018611684318
79.0542496705328
79.1066381726339
79.159026674735
79.2114151768361
79.2638036789372
79.3161921810382
79.3685806831393
79.4209691852404
79.4733576873415
79.5257461894426
79.5781346915437
79.6305231936447
79.6829116957458
79.7353001978469
79.787688699948
79.8400772020491
79.8924657041502
79.9448542062512
79.9972427083523
80.0496312104534
80.1020197125545
80.1544082146556
80.2067967167566
80.2591852188577
80.3115737209588
80.3639622230599
80.416350725161
80.468739227262
80.5211277293631
80.5735162314642
80.6259047335653
80.6782932356664
80.7306817377675
80.7830702398686
80.8354587419696
80.8878472440707
80.9402357461718
80.9926242482729
81.045012750374
81.097401252475
81.1497897545761
81.2021782566772
81.2545667587783
81.3069552608794
81.3593437629805
81.4117322650815
81.4641207671826
81.5165092692837
81.5688977713848
81.6212862734859
81.6736747755869
81.726063277688
81.7784517797891
81.8308402818902
81.8832287839913
81.9356172860924
81.9880057881934
82.0403942902945
82.0927827923956
82.1451712944967
82.1975597965978
82.2499482986989
82.3023368007999
82.354725302901
82.4071138050021
82.4595023071032
82.5118908092043
82.5642793113053
82.6166678134064
82.6690563155075
82.7214448176086
82.7738333197097
82.8262218218107
82.8786103239118
82.9309988260129
82.983387328114
83.0357758302151
83.0881643323162
83.1405528344172
83.1929413365183
83.2453298386194
83.2977183407205
83.3501068428216
83.4024953449226
83.4548838470237
83.5072723491248
83.5596608512259
83.612049353327
83.6644378554281
83.7168263575291
83.7692148596302
83.8216033617313
83.8739918638324
83.9263803659335
83.9787688680345
84.0311573701356
84.0835458722367
84.1359343743378
84.1883228764389
84.24071137854
84.293099880641
84.3454883827421
84.3978768848432
84.4502653869443
84.5026538890454
84.5550423911465
84.6074308932475
84.6598193953486
84.7122078974497
84.7645963995508
84.8169849016519
84.8693734037529
84.921761905854
84.9741504079551
85.0265389100562
85.0789274121573
85.1313159142584
85.1837044163594
85.2360929184605
85.2884814205616
85.3408699226627
85.3932584247638
85.4456469268649
85.4980354289659
85.550423931067
85.6028124331681
85.6552009352692
85.7075894373703
85.7599779394713
85.8123664415724
85.8647549436735
85.9171434457746
85.9695319478757
86.0219204499767
86.0743089520778
86.1266974541789
86.17908595628
86.2314744583811
86.2838629604822
86.3362514625832
86.3886399646843
86.4410284667854
86.4934169688865
86.5458054709876
86.5981939730887
86.6505824751897
86.7029709772908
86.7553594793919
86.807747981493
86.8601364835941
86.9125249856951
86.9649134877962
87.0173019898973
87.0696904919984
87.1220789940995
87.1744674962006
87.2268559983016
87.2792445004027
87.3316330025038
87.3840215046049
87.436410006706
87.4887985088071
87.5411870109081
87.5935755130092
87.6459640151103
87.6983525172114
87.7507410193125
87.8031295214136
87.8555180235146
87.9079065256157
87.9602950277168
88.0126835298179
88.065072031919
88.11746053402
88.1698490361211
88.2222375382222
88.2746260403233
88.3270145424244
88.3794030445254
88.4317915466265
88.4841800487276
88.5365685508287
88.5889570529298
88.6413455550309
88.6937340571319
88.746122559233
88.7985110613341
88.8508995634352
88.9032880655363
88.9556765676374
89.0080650697384
89.0604535718395
89.1128420739406
89.1652305760417
89.2176190781428
89.2700075802438
89.3223960823449
89.374784584446
89.4271730865471
89.4795615886482
89.5319500907492
89.5843385928503
89.6367270949514
89.6891155970525
89.7415040991536
89.7938926012547
89.8462811033557
89.8986696054568
89.9510581075579
90.003446609659
90.0558351117601
90.1082236138612
90.1606121159622
90.2130006180633
90.2653891201644
90.3177776222655
90.3701661243666
90.4225546264676
90.4749431285687
90.5273316306698
90.5797201327709
90.632108634872
90.6844971369731
90.7368856390741
90.7892741411752
90.8416626432763
90.8940511453774
90.9464396474785
90.9988281495796
91.0512166516806
91.1036051537817
91.1559936558828
91.2083821579839
91.260770660085
91.313159162186
91.3655476642871
91.4179361663882
91.4703246684893
91.5227131705904
91.5751016726914
91.6274901747925
91.6798786768936
91.7322671789947
91.7846556810958
91.8370441831969
91.8894326852979
91.941821187399
91.9942096895001
92.0465981916012
92.0989866937023
92.1513751958034
92.2037636979044
92.2561522000055
92.3085407021066
92.3609292042077
92.4133177063088
92.4657062084098
92.5180947105109
92.570483212612
92.6228717147131
92.6752602168142
92.7276487189153
92.7800372210163
92.8324257231174
92.8848142252185
92.9372027273196
92.9895912294207
93.0419797315217
93.0943682336228
93.1467567357239
93.199145237825
93.2515337399261
93.3039222420272
93.3563107441283
93.4086992462293
93.4610877483304
93.5134762504315
93.5658647525326
93.6182532546337
93.6706417567347
93.7230302588358
93.7754187609369
93.827807263038
93.8801957651391
93.9325842672401
93.9849727693412
94.0373612714423
94.0897497735434
94.1421382756445
94.1945267777456
94.2469152798466
94.2993037819477
94.3516922840488
94.4040807861499
94.456469288251
94.5088577903521
94.5612462924531
94.6136347945542
94.6660232966553
94.7184117987564
94.7708003008575
94.8231888029585
94.8755773050596
94.9279658071607
94.9803543092618
95.0327428113629
95.085131313464
95.137519815565
95.1899083176661
95.2422968197672
95.2946853218683
95.3470738239694
95.3994623260704
95.4518508281715
95.5042393302726
95.5566278323737
95.6090163344748
95.6614048365759
95.7137933386769
95.766181840778
95.8185703428791
95.8709588449802
95.9233473470813
95.9757358491823
96.0281243512834
96.0805128533845
96.1329013554856
96.1852898575867
96.2376783596877
96.2900668617888
96.3424553638899
96.394843865991
96.4472323680921
96.4996208701932
96.5520093722943
96.6043978743953
96.6567863764964
96.7091748785975
96.7615633806986
96.8139518827997
96.8663403849007
96.9187288870018
96.9711173891029
97.023505891204
97.0758943933051
97.1282828954061
97.1806713975072
97.2330598996083
97.2854484017094
97.3378369038105
97.3902254059116
97.4426139080126
97.4950024101137
97.5473909122148
97.5997794143159
97.652167916417
97.7045564185181
97.7569449206191
97.8093334227202
97.8617219248213
97.9141104269224
97.9664989290235
98.0188874311245
98.0712759332256
98.1236644353267
98.1760529374278
98.2284414395289
98.28082994163
98.333218443731
98.3856069458321
98.4379954479332
98.4903839500343
98.5427724521354
98.5951609542364
98.6475494563375
98.6999379584386
98.7523264605397
98.8047149626408
98.8571034647419

Radius_High_NoLoss
100	100	100	100	100	100	100	100	100	100
99.9998990669354	99.9998980474085	99.9998948613867	99.9998890845334	99.9998798415667	99.9998654225353	99.999842291997	99.9998020918382	99.9997196298729	99.9994687710581
99.9996968370574	99.9996937757589	99.9996842093242	99.9996668640659	99.9996391129261	99.9995958242779	99.9995263900388	99.9994057389137	99.9991583422152	99.9984065024762
99.9993929449344	99.9993868169235	99.9993676672937	99.9993329473432	99.9992774005614	99.9991907602564	99.9990518072662	99.9988104086298	99.9983156574522	99.996813220657
99.9989870234454	99.9989768011047	99.9989448570846	99.9988869413834	99.9987942892087	99.9986497838709	99.9984180560718	99.998015575259	99.9971911394277	99.9946888241631
99.9984787037738	99.9984633568275	99.9984153987881	99.9983284514706	99.9981893618552	99.9979724469126	99.9976246483606	99.9970207212642	99.9957843785472	99.992033108917
99.9978676154006	99.9978461109316	99.9977789107892	99.9976570811485	99.9974621997366	99.9971582995913	99.9966710958423	99.9958253376376	99.9940949801479	99.9888457864697
99.9971533860973	99.9971246885633	99.9970350097588	99.9968724322137	99.9966123823357	99.9962068905707	99.9955569103134	99.9944289236363	99.9921225564868	99.9851264973757
99.9963356419198	99.9962987131676	99.9961833106472	99.9959741047093	99.9956394873824	99.9951177670109	99.9942816039043	99.9928309861627	99.9898667212318	99.9808748210992
99.995414007201	99.9953678064804	99.9952234266752	99.9949616969189	99.9945430908538	99.9938904746161	99.9928446892834	99.991031038956	99.9873270856865	99.9760902834448
99.9943881045439	99.9943315885204	99.9941549693275	99.9938348053599	99.9933227669764	99.9925245576866	99.991245679812	99.9890286016996	99.9845032562131	99.9707723622121
99.9932575548143	99.9931896775812	99.992977548345	99.9925930247777	99.9919780882294	99.9910195591719	99.9894840896524	99.9868231991124	99.981394832485	99.9649204915646
99.9920219771341	99.9919416902232	99.9916907717164	99.9912359481402	99.9905086253492	99.9893750207238	99.9875594338314	99.9844143600642	99.9780014063119	99.9585340654581
99.9906809888733	99.9905872412658	99.9902942456716	99.9897631666315	99.9889139473344	99.9875904827489	99.9854712282664	99.981801616739	99.9743225608615	99.9516124403769
99.9892342056434	99.989125943779	99.9887875746735	99.9881742696473	99.9871936214535	99.9856654844571	99.9832189897559	99.9789845038569	99.9703578701535	99.94415493755
99.9876812412892	99.9875574090758	99.9871703614107	99.9864688447891	99.9853472132517	99.9835995639074	99.9808022359424	99.9759625579625	99.9661068987413	99.9361608447757
99.986021707882	99.9858812467038	99.9854422067896	99.9846464778597	99.9833742865596	99.981392258049	99.9782204852519	99.972735316776	99.9615692015229	99.9276294179442
99.984330463886	99.9841730727931	99.9836810938616	99.9827894442094	99.98136398685	99.9791434379407	99.9755908405425	99.969449882112	99.9569533934084	99.9189561383457
99.9825321679853	99.9823567856571	99.9818085438435	99.9808149551368	99.9792266309342	99.9767526707451	99.972795644085	99.9659586854004	99.9520504319408	99.9097439857257
99.9806264283873	99.9804319909893	99.9798241537652	99.9787225925785	99.9769617791503	99.9742194918365	99.9698344171801	99.9622612621047	99.9468597928012	99.8999922499298
99.9786128515011	99.9783982926931	99.9777275188523	99.9765119366626	99.9745689901636	99.9715434355837	99.9667066813973	99.9583571447239	99.9413809600799	99.8897001669718
99.9764910419297	99.9762552928737	99.9755182325181	99.9741825657051	99.9720478209757	99.9687240353624	99.9634119583765	99.954245863562	99.9356134206928	99.8788669271018
99.9742606024624	99.9740025918296	99.9731958863569	99.9717340562068	99.9693978269334	99.9657608235599	99.9599497696777	99.9499269471193	99.9295566605383	99.8674916806103
99.9719211340667	99.9716397880449	99.9707600701363	99.9691659828499	99.9666185617371	99.9626533315742	99.9563196366609	99.945399922237	99.9232101618594	99.8555735420416
99.9694722358805	99.9691664781809	99.9682103717903	99.9664779184953	99.9637095774483	99.9594010898093	99.9525210803805	99.9406643140868	99.9165734014384	99.8431115932841
99.9669135052037	99.9665822570678	99.9655463774121	99.96366943418	99.9606704244964	99.9560036276677	99.948553621489	99.9357196460658	99.9096458493661	99.8301048858665
99.9642445374907	99.9638867176966	99.9627676712468	99.9607400991144	99.9575006516846	99.9524604735394	99.9444167801445	99.9305654396368	99.9024269682073	99.8165524426864
99.9614649263416	99.9610794512109	99.9598738356849	99.9576894806794	99.9541998061951	99.9487711547893	99.9401100759184	99.9252012141399	99.8949162124408	99.8024532593316
99.9585742634945	99.9581600468985	99.9568644512546	99.9545171444246	99.9507674335935	99.9449351977423	99.9356330277038	99.9196264865938	99.8871130280873	99.7878063051071
99.9555721388168	99.9551280921835	99.9537390966156	99.9512226540653	99.9472030778321	99.9409521276657	99.9309851536226	99.9138407714952	99.8790168524663	99.7726105238447
99.9524581402975	99.9519831726177	99.9504973485519	99.9478055714803	99.9435062812524	99.9368214687508	99.9261659709318	99.9078435806259	99.8706271140418	99.7568648345535
99.949231854038	99.9487248718724	99.9471387819651	99.9442654567094	99.9396765845867	99.9325427440911	99.9211749959298	99.9016344228676	99.8619432323285	99.7405681319489
99.9458928642446	99.9453527717305	99.9436629698674	99.940601867951	99.9357135269586	99.9281154756601	99.9160117438613	99.8952128040299	99.852964617838	99.7237192868906
99.9424407532192	99.9418664520777	99.9400694833753	99.9368143615593	99.9316166458833	99.9235391842862	99.9106757288236	99.8885782266894	99.843690672053	99.7063171467479
99.9389562907793	99.9383475007935	99.9364424656241	99.9329917152004	99.9274821396971	99.9189216585265	99.9052933542997	99.8818894533692	99.8343464911866	99.6887886541959
99.9353581871984	99.9347138077947	99.9326972415128	99.92904460361	99.9232132464758	99.9141545444802	99.8997376802602	99.8749872114934	99.8247062937194	99.6707045779673
99.9316460206428	99.9309649488398	99.9288333780708	99.9249725792814	99.918809500632	99.9092373610768	99.8940082179804	99.8678709904589	99.8147694005841	99.652063829325
99.9278193673476	99.9271004977658	99.9248504404129	99.92077519286	99.9142704349642	99.9041696259778	99.8881044770966	99.8605402736148	99.8045351432774	99.6328652689494
99.923877801608	99.9231200264798	99.9207479917332	99.9164519931398	99.9095955806525	99.8989508555418	99.8820259654358	99.8529945393931	99.7940028578242	99.6131077150103
99.9198208957712	99.9190231049507	99.9165255932982	99.91200252706	99.9047844672518	99.8935805647857	99.8757721889057	99.8452332619966	99.7831718806053	99.5927899488696
99.9156482202271	99.9148093012009	99.9121828044403	99.9074263397017	99.8998366226851	99.8880582673446	99.8693426514181	99.8372559117925	99.7720415454747	99.5719107191294
99.9113593434002	99.9104781812979	99.9077191825517	99.9027229742835	99.8947515732354	99.8823834754322	99.8627368548352	99.8290619555121	99.7606111817684	99.5504687445219
99.9069538317407	99.9060293093463	99.903134283077	99.8978919721575	99.8895288435367	99.8765556998006	99.855954298925	99.8206508563244	99.7488801129303	99.5284627159848
99.9024312497153	99.9014622474794	99.8984276595075	99.8929328728049	99.8841679565639	99.8705744497016	99.8489944813227	99.8120220738309	99.7368476555636	99.505891298163
99.8977911597992	99.8967765558507	99.8935988633737	99.8878452138311	99.8786684336222	99.8644392328496	99.8418568974937	99.8031750640105	99.7245131187768	99.4827531305038
99.8930331224667	99.891971792626	99.8886474442395	99.882628530961	99.8730297943357	99.8581495553844	99.8345410406955	99.7941092791364	99.7118758037337	99.4590468280616
99.8881566961823	99.8870475139744	99.8835729496948	99.8772823580333	99.8672515566351	99.8517049218351	99.8270464019379	99.7848241676788	99.6989350033427	99.4347709820954
99.8831614373923	99.8820032740607	99.878374925349	99.8718062269951	99.861333236745	99.8451048350855	99.8193724699419	99.7753191741996	99.685690002043	99.4099241605141
99.8780469005152	99.8768386250366	99.8730529148245	99.8661996678959	99.8552743491703	99.8383487963384	99.8115187310952	99.7655937392481	99.672140075657	99.3845049082127
99.8728126379334	99.8715531170325	99.867606459749	99.8604622088814	99.849074406683	99.8314363050824	99.8034846694074	99.7556472992578	99.6582844912886	99.3585117473253
99.8674581999836	99.866146298149	99.8620350997495	99.8545933761869	99.8427329203069	99.824366859057	99.7952697664615	99.7454792864479	99.6441225072511	99.3319431774172
99.8620707068806	99.8607061718259	99.8564295969598	99.848688936414	99.8363536711552	99.8172567549496	99.7870104073925	99.7352609971705	99.6298970404882	99.3052604581841
99.8565624788624	99.8551441733861	99.8506986195961	99.842652541731	99.8298322897853	99.8099891142528	99.7785696376199	99.7248205238975	99.6153642555538	99.2779994081484
99.8509330618384	99.8494598465389	99.8448417030182	99.8364837144319	99.8231682837744	99.8025634311129	99.7699469324627	99.7141572829141	99.6005233270587	99.2501586031772
99.8451819996439	99.8436527329388	99.8388583805649	99.8301819748796	99.816361158896	99.7949791977829	99.7611417644814	99.7032706835053	99.5853734416828	99.2217365668076
99.8393088340314	99.8377223721778	99.8327481835466	99.8237468414974	99.8094104191031	99.7872359045848	99.7521536033396	99.6921601292102	99.5699137916652	99.1927317787674
99.8333131046613	99.8316683017761	99.826510641238	99.8171778307609	99.8023155665108	99.7793330398701	99.7429819157269	99.6808250185975	99.5541435702952	99.163142680961
99.8271943490929	99.8254900571742	99.8201452808702	99.810474457189	99.7950761013784	99.7712700899782	99.7336261653173	99.6692647457211	99.5380619687875	99.1329676816872
99.8209521027751	99.8191871717237	99.8136516276233	99.8036362333353	99.7876915220915	99.7630465391979	99.7240858127478	99.657478700365	99.5216681741139	99.1022051586194
99.8145858990372	99.812759176679	99.8070292046182	99.796662669778	99.7801613251433	99.754661869728	99.7143603156076	99.6454662681496	99.504961367499	99.0708534609193
99.8080952690798	99.8062056011882	99.800277532909	99.7895532751111	99.7724850051149	99.7461155616408	99.7044491284299	99.6332268305507	99.4879407233724	99.0389109107395
99.8014797419654	99.7995259722849	99.7933961314745	99.7823075559336	99.7646620546564	99.7374070928469	99.6943517026842	99.6207597648627	99.4706054086391	99.0063758042946
99.7947388446089	99.7927198148788	99.7863845172103	99.7749250168401	99.7566919644667	99.7285359390616	99.6840674867664	99.6080644441298	99.4529545821682	98.9732464126262
99.7878721017687	99.7857866517472	99.7792422049202	99.7674051604095	99.7485742232739	99.7195015737724	99.6735959259848	99.5951402370591	99.4349873944332	98.9395209821488
99.7808790360367	99.778726003526	99.7719687073077	99.7597474871943	99.7403083178147	99.7103034682074	99.6629364625428	99.5819865079245	99.4167029872566	98.9051977350369
99.7737591678291	99.7715373887004	99.7645635349676	99.7519514957097	99.7318937328146	99.700941091305	99.6520885355181	99.5686026164688	99.3981004936264	98.870274869498
99.766512015377	99.7642203235965	99.7570261963765	99.744016682422	99.7233299509669	99.6914139096843	99.6410515808382	99.5549879178064	99.3791790375624	98.8347505599604
99.7592310690007	99.7568692475002	99.7494540946373	99.7360458273766	99.7147283628174	99.6818467562985	99.6299720023946	99.5413263141518	99.3601995231935	98.7991209905479
99.7518222391564	99.7493891211273	99.7417492202178	99.7279355364522	99.7059769610375	99.6721141844652	99.6187027699274	99.5274331801458	99.3408999138404	98.7628864743173
99.7442850393645	99.7417794561573	99.7339110771088	99.7196853018786	99.6970752241461	99.6622156556897	99.6072433111898	99.5133078536272	99.3212792456497	98.7260452686586
99.7366189809302	99.7340397620834	99.7259391671566	99.7112946137977	99.6880226285541	99.6521506290318	99.5955930505189	99.4989496648646	99.301336567859	98.6885955753106
99.7288235729341	99.7261695462033	99.7178329900528	99.7027629602505	99.6788186485431	99.641918561073	99.5837514087076	99.4843579378905	99.2810709358439	98.6505355493921
99.7208983222221	99.7181683136093	99.7095920433251	99.6940898271642	99.669462756244	99.6315189058815	99.5717178029391	99.4695319913268	99.2604814062966	98.6118633057308
99.7128427333962	99.710035567179	99.7012158223274	99.6852746983391	99.6599544216155	99.6209511149758	99.5594916467597	99.4544711388703	99.2395670338787	98.572576923307
99.704656308804	99.7017708075658	99.6927038202294	99.6763170554348	99.650293112422	99.6102146372897	99.5470723500702	99.4391746895524	99.2183268688938	98.53267444838
99.6963385485292	99.6933735331885	99.6840555280069	99.6672163779569	99.6404782942114	99.5993089191385	99.5344593191287	99.4236419478525	99.196759955667	98.4921538966887
99.6878889503816	99.6848432402225	99.6752704344311	99.657972143243	99.6305094302935	99.5882334041865	99.5216519565554	99.4078722137181	99.1748653314126	98.4510132550027
99.6793070098871	99.676179422589	99.6663480260579	99.648583826448	99.6203859817164	99.5769875334166	99.5086496613359	99.3918647825248	99.1526420254395	98.4092504822136
99.6705922202772	99.6673815719455	99.6572877872177	99.6390509005306	99.610107407245	99.5655707451012	99.4954518288221	99.3756189450033	99.1300890585907	98.3668635101001
99.6617440724796	99.6584491776754	99.6480892000041	99.6293728362377	99.5996731633378	99.5539824747744	99.4820578507286	99.3591339871455	99.1072054428439	98.3238502438596
99.652762055107	99.6493817268781	99.638751744263	99.6195491020905	99.5890827041249	99.5422221552046	99.4684671151239	99.3424091901023	99.0839901810242	98.2802085624721
99.6436456544476	99.6401787043583	99.6292748975815	99.6095791643685	99.5783354813846	99.5302892163687	99.4546790064176	99.3254438300783	99.0604422665932	98.2359363189417
99.6343943544541	99.630839592616	99.619658135276	99.5994624870951	99.5674309445221	99.5181830854266	99.4406929053427	99.3082371782271	99.0365606834916	98.1910313404488
99.6250076367336	99.6213638718358	99.6099009303815	99.5891985320217	99.5563685405458	99.5059031866955	99.426508188935	99.2907885005508	99.0123444060176	98.1454914284349
99.6155862856617	99.6118533510022	99.6001082914322	99.5788981119876	99.5452683757341	99.4935841324113	99.4122827488809	99.2732961798025	98.988075062865	98.0998533531823
99.6060288727208	99.6022055774547	99.590174561978	99.5684497613394	99.534009688247	99.4810906476446	99.3978579902526	99.2555609814296	98.9634696578551	98.0535761890655
99.5963348744835	99.592420026418	99.5800992102266	99.5578529370759	99.5225919200021	99.4684221502517	99.3832332804659	99.2375821525092	98.9385270718572	98.0066578258512
99.5865037651434	99.5824961707694	99.5698817020669	99.5471070938708	99.5110145104391	99.4555780551357	99.3684079829759	99.2193589318603	98.9132461996027	97.9590960932249
99.5765350165045	99.5724334810281	99.5595215010566	99.5362116840565	99.4992768964966	99.4425577742174	99.353381457146	99.2008905514676	98.8876259422709	97.9108887703609
99.5664280979701	99.5622314253433	99.5490180684095	99.5251661576072	99.4873785125897	99.4293607164025	99.3381530581836	99.1821762373606	98.8616652023426	97.862033592615
99.5561824765322	99.5518894694835	99.5383708629832	99.5139699621227	99.4753187905869	99.415986287548	99.3227221371148	99.1632152101322	98.8353628800227	97.8125282562078
99.5457976167599	99.541407076825	99.5275793412658	99.5026225428113	99.4630971597872	99.402433890429	99.3070880407813	99.1440066852159	98.808717870749	97.7623704215034
99.5352729807888	99.5307837083402	99.5166429573633	99.4911233424729	99.4507130468961	99.3887029247078	99.2912501118467	99.1245498730075	98.7817290634526	97.7115577153037
99.5246080283094	99.520018822586	99.5055611629861	99.4794718014818	99.438165876003	99.3747927869032	99.2752076888062	99.1048439788854	98.7543953393383	97.6600877324493
99.5138022165556	99.5091118756922	99.494333407436	99.4676673577693	99.4254550685568	99.3607028703622	99.2589601059944	99.0848882031689	98.7267155710251	97.607958036931
99.5028550002937	99.4980623213494	99.4829591375921	99.4557094468066	99.4125800433428	99.3464325652331	99.2425066935899	99.0646817410389	98.6986886219348	97.5551661626543
99.4917658318102	99.4868696107971	99.4714377978977	99.4435975015865	99.3995402164586	99.3319812584394	99.2258467776148	99.044223782437	98.6703133458537	97.5017096139544
99.4805341609007	99.4755331928115	99.4597688303464	99.4313309526061	99.3863350012912	99.3173483336549	99.2089796799292	99.0235135119557	98.6415885866123	97.4475858659337
99.4691594348576	99.4640525136931	99.4479516744676	99.4189092278484	99.3729638084926	99.3025331712794	99.1919047182204	99.0025501087241	98.6125131778478	97.3927923646682
99.4576410984584	99.4524270172547	99.4359857673129	99.4063317527648	99.3594260459568	99.2875351484146	99.1746212059876	98.9813327462947	98.5830859428222	97.3373265273185
99.4459785939537	99.4406561448082	99.4238705434413	99.3935979502561	99.3457211187965	99.2723536388407	99.1571284525222	98.9598605925344	98.5533056942802	97.2811857421698
99.4342805408171	99.4288496219771	99.4117191819796	99.380827263801	99.3319784993445	99.257133768599	99.1395967124382	98.9383476407334	98.5234764772802	97.2249511200422
99.42243762742	99.4168970326943	99.3994178107439	99.3678995526508	99.3180680114234	99.2417296870389	99.1218549375146	98.9165789045345	98.4932926290251	97.168036686832
99.4104492906063	99.4047978129251	99.3869658590041	99.3548142342981	99.3039890541021	99.2261407602723	99.1039024261051	98.8945535311999	98.4627528627083	97.1104399218146
99.3983149646546	99.3925513960951	99.3743627534909	99.3415707236225	99.2897410235832	99.2103663509845	99.0857384720865	98.8722706590151	98.4318559058943	97.0521582386698
99.3860340812654	99.3801572130769	99.3616079183807	99.3281684328713	99.2753233131798	99.1944058184058	99.0673623647214	98.8497294187922	98.4006004926396	96.9931889956086
99.3736060695486	99.3676146921772	99.3487007752802	99.3146067716412	99.2607353132914	99.1782585182788	99.0487733885921	98.8269289347982	98.3689853580197	96.9335295024404
99.3610303560107	99.3549232591229	99.3356407432112	99.3008851468585	99.2459764113804	99.1619238028255	99.0299708235758	98.8038683252994	98.3370092343198	96.8731770255041
99.3483063645419	99.3420823370474	99.3224272385951	99.28700296276	99.2310459919477	99.1454010207142	99.0109539448423	98.780546702851	98.3046708483783	96.812128791105
99.3354335164032	99.3290913464774	99.3090596752368	99.2729596208735	99.2159434365085	99.1286895170288	98.9917220228621	98.7569631744209	98.2719689197278	96.7503819879036
99.3224112302132	99.3159497053185	99.2955374643092	99.2587545199983	99.2006681235675	99.1117886332382	98.9722743234175	98.7331168414074	98.2389021592871	96.6879337685679
99.3092389219349	99.3026568288414	99.2818600143371	99.2443870561855	99.1852194285948	99.0946977071686	98.9526101076118	98.7090067995895	98.2054692684363	96.6247812509038
99.2959160048622	99.2892121296674	99.2680267311805	99.2298566227178	99.1695967240007	99.0774160729763	98.9327286318745	98.6846321390383	98.1716689383541	96.5609215186159
99.2824418896063	99.2756150177548	99.254037018019	99.2151626100898	99.1537993791114	99.0599430611223	98.9126291479615	98.6599919440059	98.1374998495399	96.4963516218033
99.2688159840824	99.2618649003835	99.2398902753349	99.2003044059878	99.137826760144	99.0422779983465	98.8923109029492	98.6350852928031	98.1029606714602	96.4310685772646
99.2550376934954	99.2479611821411	99.2255859008965	99.1852813952692	99.1216782301822	99.0244202076447	98.8717731392234	98.6099112576741	98.0680500622828	96.3650693686639
99.2411064203261	99.2339032649076	99.2111232897411	99.1700929599426	99.1053531491515	99.0063690082433	98.8510150944631	98.5844689046717	98.0327666686712	96.2983509465947
99.2271386434662	99.2198088157196	99.1966238178563	99.1548672031577	99.0889903896338	98.9882800844168	98.8302194510453	98.5589879467872	97.9974371894633	96.2315397294584
99.213017143403	99.2055594295771	99.1819653693473	99.1394752764238	99.0724503209987	98.9699969582464	98.809202636115	98.5332375314421	97.961733053139	96.1640036998831
99.1987413167954	99.1911545025667	99.167147333425	99.1239165556348	99.0557322962086	98.9515189401819	98.7879638751567	98.5072167024961	97.9256528006605	96.0957398989714
99.1843105575328	99.176593428021	99.1521690965141	99.1081904137653	99.0388356649798	98.9328453367992	98.7665023886761	98.4809244941285	97.8891949875663	96.0267452959387
99.1697242567207	99.1618755965027	99.1370300422356	99.09229622085	99.0217597737576	98.913975450771	98.7448173920577	98.4543599324067	97.8523581756586	95.9570167987689
99.1549818026659	99.1470003957895	99.121729551389	99.076233343962	99.0045039656912	98.8949085808337	98.7229080954962	98.4275220362506	97.8151409272242	95.8865512616354
99.1400825808622	99.1319672108578	99.1062670019342	99.0600011471924	98.9870675806085	98.8756440217536	98.7007737039714	98.4004098179932	97.7775418010084	95.8153454900644
99.1250259739745	99.1167754238671	99.0906417689742	99.0435989916276	98.969449954991	98.8561810642933	98.6784134172453	98.3730222836757	97.7395593494028	95.7433962445182
99.1098113618246	99.1014244141439	99.0748532247359	99.0270262353291	98.9516504219479	98.8365189951797	98.6558264298708	98.3453584331662	97.7011921164735	95.6707002428696
99.0944381213752	99.0859135581653	99.0589007385528	99.0102822333108	98.9336683111901	98.8166570970731	98.633011931202	98.3174172601694	97.6624386365697	95.5972541620963
99.078905626715	99.0702422295427	99.0427836768455	98.9933663375179	98.9155029490046	98.7965946485381	98.6099691054034	98.2891977521651	97.6232974333352	95.523054639423
99.0632132490427	99.0544097990052	99.0265014031041	98.9762778968041	98.897153658228	98.7763309240161	98.5866971314542	98.2606988903057	97.5837670189979	95.4480982730704
99.0473603566516	99.0384156343829	99.0100532778685	98.9590162569103	98.8786197582209	98.7558651937985	98.5631951831463	98.2319196492911	97.5438458938516	95.3723816227238
99.0313463149133	99.0222591005902	98.9934386587098	98.9415807604421	98.8599005648415	98.7351967240007	98.5394624290771	98.202858997232	97.5035325458706	95.295901209798
99.0151704862619	99.0059395596085	98.9766569002114	98.923970746847	98.8409953904196	98.7143247765369	98.5154980326358	98.1735158955097	97.4628254504156	95.2186535175547
98.9988322301776	98.9894563704693	98.9597073539491	98.9061855523923	98.8219035437304	98.6932486090949	98.4913011519834	98.1438892986371	97.4217230700034	95.1406349911098
98.9823309031704	98.9728088892365	98.9425893684724	98.8882245101423	98.8026243299688	98.6719674751114	98.4668709400293	98.1139781541239	97.3802238541194	95.0618420373589
98.9657919843317	98.956123877222	98.9254337074219	98.8702256427662	98.7833073933175	98.6506491649757	98.4424043441227	98.0840302515336	97.3386806463971	94.9829539862951
98.9490891979751	98.9392737797987	98.9081088115658	98.8520501235057	98.7638022642228	98.6291250099628	98.4177034113789	98.0537964917778	97.2967384294893	94.9032850111811
98.932221894257	98.9222579466634	98.8906140229524	98.8336972784772	98.7441082399014	98.6073942535595	98.3927672811197	98.023275797781	97.2543955398166	94.8228316069109
98.9151894203101	98.9050757244896	98.8729486805392	98.8151664305167	98.724224613897	98.5854561348901	98.3675950871065	97.9924670818153	97.2116503282173	94.7415901887747
98.8979911202257	98.8877264569098	98.8551121201723	98.7964568991569	98.7041506760542	98.563309888685	98.3421859573863	97.9613692471427	97.168501151198	94.6595571036133
98.8806263350367	98.8702094844969	98.8371036745665	98.7775680006036	98.6838857124911	98.5409547452452	98.3165390142161	97.929981189024	97.1249463648453	94.576728637562
98.8630944027003	98.8525241447462	98.8189226732847	98.7584990477119	98.6634290055729	98.5183899304048	98.2906533740319	97.8983017953037	97.0809843205791	94.4931010214138
98.8453946580804	98.8346697720564	98.8005684427172	98.7392493499632	98.6427798338846	98.4956146654956	98.2645281474425	97.866329946714	97.0366133621814	94.4086704343174
98.8275264329299	98.8166456977109	98.7820403060609	98.7198182134406	98.6219374722034	98.4726281673109	98.2381624392345	97.8340645169962	96.9918318237064	94.3234330063041
98.8094890558727	98.7984512498591	98.7633375832985	98.7002049408054	98.6009011914705	98.449429648073	98.2115553483798	97.801504372904	96.9466380280018	94.237384819992
98.7912818523856	98.7800857534971	98.7444595911769	98.6804088312731	98.5796702587638	98.4260183154001	98.1847059680414	97.7686483741342	96.9010302856523	94.1505219117061
98.7729041447801	98.7615485304486	98.7254056431867	98.6604291805884	98.5582439372691	98.4023933722767	98.157613385574	97.7354953732133	96.8550068942153	94.0628402721832
98.754355252184	98.7428388993452	98.7061750495398	98.6402652810016	98.5366214862525	98.3785540170232	98.1302766825188	97.7020442153591	96.8085661376588	93.9743358469801
98.7356344905227	98.7239561756069	98.6867671171484	98.6199164212433	98.5148021610316	98.3544994432676	98.1026949345921	97.6682937383316	96.761706285938	93.8850045366649
98.7167411725003	98.7048996714227	98.6671811496033	98.5993818865001	98.4927852129473	98.3302288399166	98.074867211667	97.6342427722785	96.7144255946688	93.7948421968516
98.6976746075808	98.6856686957301	98.6474164471511	98.5786609583892	98.470569889336	98.3057413911282	98.0467925777495	97.599890139583	96.666722304867	93.7038446381178
98.6784341019689	98.6662625541951	98.6274723066732	98.5577529149338	98.4481554335004	98.2810362762835	98.0184700909491	97.5652346547144	96.6185946427323	93.6120076258342
98.6591548045384	98.6468177792283	98.607489579313	98.5368064404086	98.4257030720792	98.2562943126185	97.9901120663198	97.5305436201691	96.5704237963986	93.520068666814
98.6397007083314	98.6271969837793	98.5873265556145	98.5156719790862	98.4030506754089	98.2313337079376	97.9615050537438	97.4955482328911	96.5218260646185	93.4272827149742
98.6200711125624	98.6073994664656	98.56698252518	98.4943488011246	98.3801974777355	98.2061536303988	97.9326480961192	97.4602472801324	96.4727995527404	93.333645616473
98.6002653131234	98.5874245225682	98.5464567741727	98.4728361730019	98.3571427091714	98.1807532432608	97.9035402301107	97.4246395374162	96.4233423799349	93.2391531284343
98.5802826025638	98.5672714440108	98.5257485852937	98.4511333574911	98.3338855956666	98.155131704847	97.8741804859863	97.3887237702411	96.3734526700266	93.143800930562
98.56012227007	98.5469395193385	98.5048572377593	98.4292396136341	98.310425358979	98.1292881685064	97.8445678875344	97.3524987351237	96.3231285451077	93.047584633174
98.5397836014458	98.5264280336964	98.4837820072773	98.4071541967155	98.2867612166452	98.1032217825729	97.8147014520281	97.315963180198	96.272368121076	92.9504997827342
98.5192658790912	98.5057362688087	98.4625221660239	98.3848763582363	98.2628923819504	98.0769316903247	97.7845801902148	97.2791158455228	96.2211695045066	92.8525418656326
98.4985683819825	98.4848635029562	98.4410769826198	98.3624053458874	98.2388180638978	98.0504170299455	97.754203106317	97.2419554631973	96.1695307904448	92.7537063107355
98.4776903856507	98.463809010955	98.4194457221068	98.3397404035231	98.2145374671782	98.0236769344869	97.7235691980365	97.2044807573549	96.1174500608382	92.6539884910673
98.4566311621611	98.4425720641347	98.3976276459236	98.3168807711343	98.1900497921391	97.9967105318328	97.692677456555	97.1666904440793	96.0649253834094	92.5533837248776
98.4353899800918	98.4211519303153	98.3756220118815	98.293825684821	98.1653542347535	97.9695169446645	97.6615268665313	97.1285832312764	96.0119548108354	92.4518872762701
98.4139661045122	98.3995478737858	98.3534280741403	98.2705743767658	98.1404499865886	97.9420952904273	97.6301164060903	97.0901578185192	95.9585363801364	92.3494943555161
98.3923587969614	98.3777591552809	98.3310450831839	98.2471260752059	98.115336234775	97.914444681298	97.5984450468065	97.0514128968814	95.9046681122108	92.2462001191393
98.3705673154265	98.3557850319587	98.3084722857952	98.2234800044059	98.0900121619746	97.8865642241525	97.56651175368	97.0123471487657	95.8503480114712	92.141999669832
98.3485909143204	98.3336247573775	98.2857089250316	98.1996353846297	98.0644769463498	97.8584530205335	97.5343154851063	96.9729592477341	95.7955740655477	92.0368880562472
98.3264288444595	98.3112775814726	98.2627542401994	98.1755914321128	98.0387297615314	97.8301101666187	97.5018551928404	96.9332478583415	95.7403442450395	91.9308602726947
98.3044306189622	98.2890965926605	98.2399724927463	98.1517326807192	98.0131876162001	97.8020034313771	97.469680346043	96.8939053169477	95.6856477300617	91.8258427687134
98.2824512357488	98.2669353119019	98.2172125777277	98.1278996253683	97.9876775367232	97.7739387648027	97.4375629261897	96.8546441146882	95.6310731265244	91.7210309887736
98.2604907103368	98.2447937604284	98.1944745265931	98.1040923115847	97.9621995837249	97.7459162361269	97.4055029864615	96.8154642075238	95.5766198529785	91.6164226806676
98.2385490585038	98.222671959676	98.1717583709453	98.0803107849084	97.9367538175039	97.7179359134216	97.3735005762302	96.7763655294222	95.5222872746351	91.5120157586813
98.2166262962841	98.2005699312843	98.1490641425371	98.056555090888	97.911340298018	97.6899978635389	97.3415557404602	96.7373479920719	95.468074723535	91.4078082705156
98.1947224399663	98.1784876970952	98.1263918732675	98.0328252750736	97.8859590848666	97.6621021520337	97.3096685191485	96.6984114855971	95.413981512425	91.3037983729443
98.1728375060902	98.1564252791515	98.1037415951787	98.0091213830092	97.8606102372716	97.6342488430716	97.277838946838	96.6595558798464	95.3600069442763	91.1999843136799
98.1509715114442	98.1343826996959	98.0811133404523	97.9854434602255	97.8352938140572	97.6064379993264	97.2460670522209	96.6207810259765	95.3061503187837	91.096364417678
98.1291244730626	98.1123599811689	98.0585071414056	97.9617915522316	97.8100098736264	97.5786696818694	97.214352857836	96.5820867581524	95.2524109367753	90.9929370766352
98.107296408223	98.0903571462079	98.0359230304882	97.938165704507	97.7847584739362	97.5509439500567	97.1826963798554	96.5434728952521	95.1987881031762	90.8897007408047
98.0854873344438	98.0683742176451	98.0133610402782	97.914565962493	97.7595396724702	97.5232608614149	97.1510976279537	96.5049392425074	95.1452811289709	90.7866539125098
98.0636972694817	98.0464112185059	97.9908212034782	97.8909923715837	97.7343535262086	97.4956204715307	97.1195566052491	96.466485593045	95.0918893324754	90.6837951409159
98.0419262313293	98.0244681720073	97.9683035529114	97.8674449771166	97.7092000915971	97.4680228339444	97.0880733083074	96.4281117293074	95.0386120401312	90.5811230177438
98.0201742382124	98.0025451015557	97.9458081215174	97.8439238243622	97.6840794245135	97.4404680000506	97.0566477271984	96.3898174243485	94.9854485869722	90.4786361737003
97.9984413085882	97.9806420307453	97.9233349423485	97.820428958514	97.6589915802336	97.4129560190067	97.0252798455942	96.3516024430047	94.9323983168654	90.3763332754596
97.9767274611422	97.9587589833557	97.9008840485648	97.7969604246769	97.6339366133951	97.3854869376501	96.993969640904	96.3134665429469	94.8794605825992	90.2742130230775
97.9550327147864	97.9368959833501	97.8784554734298	97.7735182678562	97.6089145779615	97.3580608004247	96.9627170844347	96.2754094756221	94.8266347458661	90.1722741477474
97.9333570886568	97.915053054873	97.8560492503063	97.7501025329448	97.5839255271857	97.3306776493175	96.9315221415728	96.237430987093	94.7739201771771	90.0705154098331
97.9117006021109	97.8932302222479	97.8336654126509	97.7267132647109	97.5589695135728	97.3033375238041	96.900384771982	96.1995308187863	94.7213162557299	89.9689355971275
97.8900632747258	97.871427509975	97.8113039940095	97.7033505077845	97.5340465888439	97.2760404608043	96.869304929811	96.1617087081575	94.6688223692478	89.8675335232993
97.8684451262955	97.8496449427289	97.788965028012	97.6800143066443	97.5091568039	97.2487864946465	96.8382825639085	96.1239643892821	94.6164379138007	89.7663080264961
97.8468461768287	97.8278825453559	97.7666485483668	97.6567047056027	97.4843002087864	97.2215756570414	96.8073176180424	96.0862975933806	94.5641622936164	89.6652579680829
97.8252664465464	97.8061403428715	97.7443545888556	97.6334217487922	97.4594768526585	97.1944079770634	96.7764100311189	96.0487080492856	94.5119949208873	89.5643822314943
97.80370595588	97.7844183604578	97.7220831833276	97.6101654801499	97.434686783749	97.1672834811402	96.7455597374015	96.0111954838562	94.4599352155761	89.4636797211868
97.7821647254684	97.7627166234606	97.699834365693	97.5869359434027	97.4099300493352	97.1402021930495	96.7147666667274	95.9737596223469	94.4079826052228	89.3631493616785
97.7606427761558	97.7410351573869	97.6776081699179	97.5637331820515	97.3852066957092	97.1131641339227	96.684030744719	95.936400188736	94.3561365247558	89.2627900966646
97.7391401289896	97.7193739879013	97.655404630017	97.5405572393561	97.3605167681486	97.0861693222542	96.6533518929916	95.8991169060171	94.3043964163068	89.162600888202
97.7176568052175	97.6977331408237	97.6332237800478	97.5174081583193	97.3358603108894	97.0592177739167	96.6227300293544	95.8619094964598	94.2527617290302	89.0625807159528
97.6961928262858	97.6761126421255	97.6110656541032	97.4942859816706	97.3112373671008	97.0323095021813	96.5921650680053	95.8247776818417	94.2012319189293	88.9627285764833
97.6747482138359	97.6545125179271	97.5889302863054	97.4711907518509	97.286647978861	97.0054445177425	96.5616569197194	95.787721183655	94.1498064486862	88.8630434826102
97.6533229897028	97.6329327944939	97.5668177107979	97.4481225109966	97.2620921871355	96.9786228287464	96.5312054920305	95.7507397232913	94.0984847874994	88.763524462792
97.6319171759122	97.611373498233	97.5447279617394	97.4250813009234	97.2375700317571	96.9518444408232	96.5008106894045	95.7138330222068	94.047266410925	88.6641705605589
97.6105307946776	97.5898346556902	97.5226610732951	97.4020671631109	97.2130815514076	96.9251093571227	96.4704724134075	95.6770008020694	93.996150800725	88.564980833979
97.5891638683982	97.5683162935455	97.5006170796301	97.379080138687	97.188626783601	96.8984175783522	96.440190562865	95.6402427848907	93.9451374447202	88.4659543551577
97.567816419656	97.5468184386103	97.4785960149013	97.3561202684127	97.1642057646695	96.8717691028168	96.4099650340152	95.6035586931436	93.8942258366482	88.3670902097664
97.546488471213	97.5253411178226	97.4565979132497	97.3331875926666	97.13981852975	96.8451639264619	96.3797957206554	95.5669482498678	93.8434154760271	88.2683874965989
97.5251800460085	97.5038843582439	97.4346228087921	97.3102821514307	97.1154651127734	96.818602042917	96.3496825142807	95.5304111787644	93.7927058680231	88.169845327153
97.5038911671567	97.4824481870545	97.4126707356136	97.2874039842753	97.0911455464546	96.7920834435415	96.319625304218	95.4939472042796	93.742096523324	88.0714628252348
97.4826218579429	97.4610326315498	97.390741727759	97.264553130345	97.0668598622851	96.7656081174706	96.2896239777518	95.4575560516806	93.691586958016	87.9732391265848
97.4613721418217	97.4396377191356	97.3688358192246	97.241729628345	97.0426080905262	96.739176051663	96.2596784202453	95.4212374471227	93.6411766934652	87.8751733785228
97.4401420424131	97.4182634773244	97.34695304395	97.2189335165274	97.0183902602046	96.7127872309485	96.2297885152553	95.38499111771	93.5908652562039	87.7772647396122
97.4189315835	97.3969099337302	97.3250934358099	97.1961648326787	96.994206399109	96.6864416380767	96.1999541446411	95.3488167915484	93.5406521778196	87.6795123793399
97.3977407890247	97.3755771160644	97.3032570286053	97.1734236141065	96.9700565337876	96.6601392537655	96.1701751886688	95.3127141977945	93.4905369948487	87.5819154778127
97.3765696830861	97.3542650521312	97.2814438560551	97.1507098976278	96.9459406895482	96.6338800567495	96.1404515261103	95.2766830666974	93.4405192486733	87.4844732254675
97.3554182899363	97.3329737698225	97.2596539517882	97.1280237195573	96.921858890458	96.6076640238294	96.1107830343368	95.2407231296372	93.3905984854219	87.3871848227958
97.3342866339771	97.3117032971135	97.2378873493342	97.1053651156958	96.897811159346	96.5814911299196	96.0811695894083	95.2048341191585	93.3407742558731	87.2900494800803
97.3131747397569	97.2904536620575	97.2161440821157	97.08273412132	96.8737975178053	96.5553613480972	96.0516110661591	95.1690157690002	93.2910461153623	87.1930664171432
97.2920826319672	97.2692248927809	97.1944241834393	97.0601307711719	96.8498179861974	96.5292746496493	96.0221073382776	95.1332678141217	93.2414136236916	87.0962348631061
97.271010335439	97.2480170174786	97.1727276864875	97.0375550994491	96.825872583657	96.5032310041208	95.992658278384	95.0975899907262	93.1918763450429	86.9995540561597
97.2499578751392	97.2268300644081	97.1510546243103	97.0150071397954	96.8019613280978	96.4772303793609	95.9632637581026	95.0619820362811	93.1424338478932	86.9030232433433
97.2289252761671	97.205664061885	97.129405029817	96.9924869252924	96.7780842362191	96.4512727415696	95.9339236481315	95.026443689535	93.0930857049329	86.8066416803337
97.2079125637504	97.1845190382772	97.1077789357676	96.9699944884507	96.7542413235136	96.4253580553432	95.9046378183085	94.9909746905334	93.0438314929865	86.7104086312424
97.1869197632419	97.163395022	97.0861763747649	96.9475298612027	96.7304326042753	96.3994862837192	95.8754061376736	94.9555747806318	92.9946707929358	86.6143233684208
97.1659469001149	97.1422920415105	97.0645973792466	96.9250930748946	96.7066580916087	96.3736573882203	95.8462284745289	94.9202437025067	92.9456031896453	86.5183851722731
97.1449939999601	97.1212101253019	97.0430419814769	96.9026841602803	96.6829177974381	96.3478713288982	95.817104696495	94.8849812001647	92.8966282718901	86.4225933310768
97.124061088481	97.1001493018986	97.0215102135389	96.8803031475146	96.6592117325181	96.3221280643758	95.7880346705652	94.8497870189506	92.8477456322857	86.3269471408089
97.10314819149	97.0791095998502	97.0000021073268	96.8579500661473	96.6355399064442	96.2964275518891	95.7590182631566	94.8146609055534	92.7989548672196	86.2314459049798
97.0822553349044	97.0580910477258	96.9785176945381	96.8356249451183	96.6119023276641	96.2707697473282	95.7300553401588	94.7796026080109	92.7502555767858	86.1360889344724
97.061382544742	97.0370936741092	96.9570570066662	96.8133278127519	96.588299003489	96.2451546052774	95.7011457669805	94.7446118757137	92.70164736472	86.0408755473873
97.0405298471171	97.0161175075921	96.935620074993	96.791058696753	96.5647299401062	96.2195820790542	95.6722894085935	94.7096884594077	92.6531298383373	85.9458050688931
97.0196972682359	96.9951625767695	96.9142069305816	96.7688176242028	96.5411951425911	96.1940521207481	95.6434861295748	94.674832111195	92.604702608472	85.8508768310825
96.9988848343924	96.9742289102334	96.892817604269	96.7466046215549	96.5176946149205	96.1685646812577	95.6147357941467	94.6400425845351	92.5563652894178	85.7560901728329
96.9780925719638	96.9533165365673	96.8714521266597	96.7244197146326	96.494228359985	96.1431197103277	95.5860382662146	94.605319634244	92.508117498871	85.6614444396716
96.9573205074059	96.9324254843402	96.850110528118	96.7022629286254	96.470796379603	96.1177171565845	95.5573934094033	94.5706630164935	92.4599588578746	85.5669389836456
96.9365686672489	96.9115557821016	96.8287928387622	96.6801342880874	96.4473986745338	96.0923569675713	95.5288010870918	94.536072488809	92.4118889907635	85.4725731631958
96.9158370780925	96.8907074583749	96.8074990884575	96.6580338169347	96.4240352444918	96.0670390897821	95.5002611624458	94.5015478100675	92.3639075251122	85.3783463430351
96.8951257666016	96.8698805416523	96.78622930681	96.635961538444	96.4007060881598	96.0417634686951	95.4717734984491	94.4670887404938	92.316014091683	85.2842578940301
96.874434759501	96.8490750603888	96.7649835231602	96.6139174752509	96.377411203204	96.0165300488052	95.4433379579334	94.4326950416574	92.2682083243755	85.1903071930871
96.8537640835713	96.8282910429968	96.7437617665774	96.5919016493497	96.3541505862872	95.9913387736555	95.4149544036068	94.3983664764685	92.2204898601782	85.0964936230408
96.8331137656441	96.80752851784	96.7225640658533	96.5699140820921	96.330924233084	95.9661895858683	95.3866226980806	94.364102809173	92.1728583391206	85.0028165725473
96.8124838325967	96.7867875132278	96.701390449497	96.5479547941873	96.3077321382946	95.9410824271751	95.3583427038954	94.3299038053477	92.1253134042263	84.9092754359795
96.7918743113475	96.7660680574102	96.6802409457288	96.5260238057016	96.2845742956594	95.916017238446	95.3301142835453	94.2957692318951	92.0778547014685	84.8158696133258
96.7712852288516	96.7453701785716	96.6591155824756	96.5041211360594	96.2614506979736	95.890993959718	95.3019372995013	94.2616988570375	92.0304818797249	84.7225985100924
96.750716612095	96.7246939048252	96.638014387365	96.4822468040431	96.2383613371017	95.8660125302233	95.2738116142339	94.2276924503113	91.9831945907352	84.6294615372071
96.7301684880904	96.7040392642079	96.6169373877208	96.4604008277946	96.2153062039915	95.8410728884158	95.2457370902341	94.1937497825603	91.9359924890586	84.5364581109275
96.7096408838721	96.6834062846745	96.5958846105581	96.438583224816	96.1922852886892	95.8161749719977	95.2177135900337	94.1598706259298	91.8888752320328	84.4435876527499
96.6891338264907	96.6627949940923	96.5748560825784	96.416794011971	96.1692985803537	95.7913187179454	95.1897409762243	94.1260547538593	91.8418424797337	84.3508495893225
96.6686473430085	96.6422054202354	96.5538518301658	96.3950332054873	96.1463460672706	95.7665040625342	95.1618191114762	94.092301941076	91.7948938949364	84.2582433523597
96.6481814604943	96.6216375907798	96.5328718793818	96.3733008209573	96.1234277368671	95.7417309413625	95.1339478585556	94.0586119635872	91.7480291430768	84.1657683785594
96.6277362060182	96.6010915332977	96.5119162559618	96.3515968733413	96.1005435757258	95.7169992893759	95.1061270803412	94.0249845986736	91.701247892214	84.0734241095221
96.6073116066472	96.5805672752524	96.4909849853109	96.329921376969	96.0776935695992	95.6923090408898	95.0783566398404	93.9914196248816	91.6545498129938	83.9812099916727
96.5869076894395	96.5600648439929	96.4700780925003	96.3082743455428	96.0548777034239	95.6676601296121	95.0506364002041	93.9579168220155	91.607934578613	83.8891254761833
96.5665244814397	96.5395842667492	96.4491956022635	96.2866557921397	96.0320959613343	95.6430524886648	95.0229662247415	93.9244759711304	91.5614018647842	83.7971700188994
96.5461620096739	96.5191255706263	96.4283375389928	96.2650657292149	96.0093483266766	95.6184860506055	94.9953459769336	93.891096854524	91.5149513497018	83.7053430802668
96.5258203011445	96.4986887826001	96.4075039267364	96.2435041686043	95.9866347820229	95.5939607474476	94.9677755204465	93.857779255729	91.4685827140085	83.6136441252606
96.5054993828254	96.478273929512	96.3866947891945	96.2219711215283	95.9639553091847	95.5694765106806	94.9402547191437	93.8245229595048	91.4222956407621	83.5220726233168
96.4851992816564	96.4578810380638	96.3659101497172	96.2004665985948	95.9413098892262	95.54503327129	94.912783437098	93.7913277518303	91.3760898154042	83.4306280482642
96.4649200245391	96.4375101348132	96.3451500313009	96.1789906098026	95.9186985024783	95.5206309597756	94.8853615386031	93.7581934198951	91.329964925728	83.3393098782591
96.4446616383311	96.417161246169	96.3244144565865	96.1575431645457	95.8961211285515	95.4962695061705	94.8579888881842	93.7251197520916	91.2839206618484	83.2481175957211
96.4244241498415	96.396834398386	96.3037034478558	96.1361242716164	95.8735777463491	95.4719488400589	94.8306653506082	93.6921065380072	91.2379567161711	83.1570506872705
96.4042075858256	96.3765296175609	96.28301702703	96.1147339392098	95.8510683340804	95.4476688905934	94.8033907908936	93.659153568416	91.1920727833638	83.0661086436671
96.3840119729805	96.3562469296275	96.2623552156673	96.0933721749274	95.8285928692735	95.4234295865125	94.7761650743197	93.6262606352704	91.1462685603267	82.9752909597504
96.3638373379394	96.3359863603522	96.2417180349604	96.0720389857816	95.8061513287882	95.3992308561567	94.7489880664357	93.5934275316935	91.1005437461648	82.8845971343816
96.3436837072675	96.3157479353295	96.221105505735	96.0507343781995	95.7837436888283	95.3750726274846	94.7218596330688	93.5606540519701	91.05489804216	82.7940266703864
96.3235511074567	96.2955316799779	96.2005176484479	96.0294583580278	95.761369924954	95.350954828089	94.6947796403324	93.5279399915394	91.0093311517436	82.7035790744994
96.3034395649207	96.2753376195357	96.1799544831853	96.0082109305368	95.7390300120947	95.3268773852114	94.6677479546339	93.4952851469863	90.9638427804701	82.6132538573094
96.2833491059907	96.2551657790565	96.1594160296612	95.9869921004253	95.7167239245606	95.3028402257575	94.6407644426814	93.4626893160334	90.9184326359909	82.5230505332067
96.2632797569102	96.2350161834054	96.138902307216	95.9658018718248	95.6944516360548	95.2788432763112	94.6138289714911	93.4301522975328	90.8731004280286	82.4329686203305
96.2432315438303	96.214888857255	96.1184133348153	95.9446402483041	95.6722131196852	95.2548864631486	94.5869414083937	93.3976738914581	90.827845868352	82.3430076405182
96.2232044928053	96.1947838250813	96.0979491310488	95.9235072328745	95.6500083479762	95.230969712252	94.5601016210404	93.3652538988959	90.7826686707517	82.2531671192559
96.2031986297879	96.1747011111601	96.077509714129	95.9024028279943	95.6278372928801	95.2070929493224	94.5333094774089	93.3328921220385	90.7375685510153	82.163446585629
96.1832139806246	96.154640739563	96.0570951018907	95.8813270355736	95.6056999257882	95.1832560997934	94.5065648458093	93.300588364175	90.6925452269043	82.073845572275
96.1632505710512	96.1346027341538	96.0367053117897	95.860279856979	95.5835962175425	95.1594590888427	94.4798675948888	93.2683424296837	90.6475984181305	81.9843636153367
96.1433084266882	96.1145871185852	96.0163403609026	95.8392612930389	95.5615261384462	95.1357018414049	94.4532175936371	93.2361541240243	90.6027278463332	81.8950002544161
96.1233875730365	96.094593916295	95.9960002659258	95.8182713440484	95.5394896582749	95.1119842821834	94.4266147113912	93.2040232537295	90.557933235057	81.8057550325301
96.103488035473	96.0746231505025	95.9756850431751	95.797310009774	95.5174867462871	95.0883063356615	94.4000588178396	93.1719496263975	90.5132143097293	81.7166274960664
96.0836098392461	96.0546748442057	95.9553947085859	95.7763772894587	95.4955173712346	95.064667926114	94.3735497830265	93.1399330506837	90.4685707976392	81.6276171947405
96.0637530094715	96.0347490201778	95.9351292777119	95.7554731818274	95.4735815013733	95.0410689776179	94.3470874773564	93.1079733362934	90.4240024279158	81.5387236815536
96.0439175711281	96.0148457009639	95.9148887657259	95.7345976850914	95.4516791044732	95.0175094140631	94.3206717715973	93.0760702939736	90.3795089315076	81.4499465127511
96.0241035490536	95.9949649088779	95.894673187419	95.7137507969541	95.429810147828	94.9939891591625	94.2943025368844	93.0442237355054	90.3350900411623	81.3612852477828
96.0043109679404	95.975106666	95.8744825572012	95.6929325146155	95.407974598266	94.9705081364624	94.2679796447234	93.0124334736965	90.2907454914057	81.2727394492622
95.9845398523317	95.955270994173	95.8543168891011	95.672142834778	95.3861724221588	94.9470662693522	94.241702966994	92.9806993223732	90.2464750185232	81.1843086829287
95.9647902266175	95.9354579150003	95.8341761967662	95.6513817536506	95.3644035854316	94.9236634810733	94.2154723759525	92.9490210963732	90.2022783605392	81.0959925176087
95.9450621150303	95.9156674498425	95.8140604934631	95.6306492669551	95.3426680535725	94.9002996947294	94.1892877442346	92.9173986115378	90.1581552571988	81.0077905251783
95.9253555416417	95.895899619815	95.7939697920781	95.6099453699304	95.3209657916413	94.8769748332943	94.1631489448584	92.8858316847045	90.1141054499484	80.9197022805267
95.9056705303583	95.8761544457856	95.7739041051176	95.5892700573378	95.2992967642794	94.8536888196216	94.1370558512263	92.8543201336996	90.0701286819179	80.8317273615205
95.8860071049181	95.8564319483714	95.7538634447082	95.5686233234665	95.2776609357184	94.8304415764527	94.1110083371276	92.8228637773307	90.0262246979018	80.7438653489676
95.8663652888865	95.8367321479373	95.7338478225978	95.5480051621384	95.2560582697887	94.807233026425	94.0850062767407	92.7914624353797	89.982393244342	80.6561158265831
95.8467451056531	95.8170550645926	95.7138572501559	95.5274155667133	95.2344887299288	94.7840630920805	94.0590495446347	92.7601159285951	89.9386340693098	80.5684783809553
95.8271465784279	95.7974007181897	95.6938917383747	95.5068545300938	95.2129522791935	94.7609316958728	94.0331380157717	92.7288240786851	89.8949469224888	80.4809526015116
95.8075697302378	95.7777691283213	95.6739512978696	95.486322044731	95.191448880262	94.7378387601753	94.0072715655082	92.6975867083104	89.8513315551578	80.3935380804865
95.7880145839233	95.7581603143186	95.6540359388799	95.4658181026286	95.169978495447	94.7147842072884	93.9814500695967	92.666403641077	89.8077877201742	80.3062344128888
95.7684811621349	95.7385742952489	95.6341456712704	95.4453426953491	95.1485410867021	94.6917679594469	93.9556734041871	92.6352747015292	89.7643151719577	80.2190411964702
95.7489694873303	95.7190110899142	95.6142805045316	95.4248958140179	95.1271366156301	94.6687899388266	93.9299414458282	92.6041997151426	89.7209136664736	80.1319580316942
95.7294795817704	95.6994707168489	95.5944404477814	95.4044774493288	95.1057650434909	94.6458500675512	93.9042540714687	92.5731785083173	89.6775829612173	80.0449845217052
95.710011467517	95.6799531943181	95.5746255097656	95.384087591549	95.0844263312091	94.6229482676993	93.8786111584585	92.5422109083708	89.6343228151986	79.958120272299
95.6905651664292	95.660458540316	95.5548356988595	95.3637262305238	95.0631204393817	94.6000844613105	93.8530125845493	92.5112967435313	89.5911329889261	79.871364891893
95.6711407001603	95.6409867725641	95.5350710230692	95.3433933556821	95.0418473282856	94.5772585703915	93.827458227896	92.4804358429311	89.548013244392	79.7847179914972
95.6517380901554	95.6215379085097	95.5153314900323	95.3230889560406	95.0206069578848	94.5544705169227	93.8019479670571	92.4496280365996	89.5049633450574	79.6981791846857
95.6323573576477	95.6021119653243	95.4956171070198	95.3028130202093	94.9993992878377	94.5317202228638	93.7764816809953	92.4188731554568	89.4619830558371	79.611748087569
95.6129985236567	95.5827089599023	95.475927880937	95.2825655363963	94.9782242775044	94.5090076101593	93.7510592490786	92.3881710313068	89.4190721430857	79.5254243187658
95.5936616089844	95.5633289088596	95.4562638183254	95.2623464924124	94.9570818859532	94.4863326007447	93.7256805510801	92.357521496831	89.3762303745828	79.4392074993767
95.5743466342136	95.5439718285321	95.4366249253635	95.242155875676	94.935972071968	94.4636951165516	93.7003454671792	92.326924385582	89.3334575195191	79.353097252957
95.5550536197045	95.5246377349748	95.4170112078689	95.2219936732182	94.9148947940545	94.4410950795127	93.6750538779612	92.2963795319768	89.2907533484827	79.2670932054907
95.5357825855927	95.5053266439604	95.3974226712994	95.2018598716871	94.8938500104472	94.4185324115677	93.6498056644181	92.2658867712907	89.2481176334451	79.1811949853647
95.5165335517863	95.4860385709781	95.377859320755	95.1817544573529	94.8728376791159	94.3960070346677	93.6246007079485	92.2354459396507	89.2055501477481	79.0954022233436
95.4973065379641	95.4667735312331	95.3583211609789	95.1616774161124	94.8518577577718	94.3735188707801	93.5994388903577	92.2050568740299	89.1630506660904	79.0097145525444
95.4781015635726	95.447531539645	95.3388081963598	95.1416287334937	94.8309102038739	94.3510678418938	93.574320093858	92.1747194122402	89.1206189645145	78.9241316084125
95.4589186478243	95.4283126108472	95.3193204309329	95.1216083946611	94.8099949746354	94.3286538700231	93.5492442010684	92.1444333929272	89.0782548203939	78.838653028697
95.4397578096949	95.409116759186	95.2998578683824	95.1016163844192	94.7891120270293	94.3062768772128	93.5242110950147	92.1141986555637	89.0359580124202	78.7532784534275
95.4206190679219	95.3899439987199	95.2804205120423	95.0816526872177	94.7682613177948	94.2839367855423	93.4992206591292	92.0840150404434	88.9937283205911	78.6680075248901
95.401502441002	95.3707943432188	95.2610083648989	95.0617172871562	94.747442803443	94.2616335171297	93.4742727772507	92.0538823886754	88.9515655261974	78.5828398876049
95.3824079471891	95.3516678061633	95.2416214295925	95.0418101679882	94.7266564402623	94.2393669941362	93.449367333624	92.023800542178	88.9094694118116	78.4977751883031
95.3633356044929	95.3325644007442	95.2222597084186	95.0219313131258	94.7059021843248	94.2171371387697	93.4245042128997	91.9937693436727	88.8674397612751	78.4128130759047
95.3442854306764	95.3134841398619	95.2029232033307	95.0020807056444	94.6851799914908	94.1949438732891	93.399683300134	91.9637886366788	88.825476359687	78.3279532014964
95.3252574432545	95.2944270361259	95.1836119159414	94.9822583282864	94.6644898174153	94.1727871200079	93.3749044807879	91.9338582655072	88.7835789933924	78.2431952183104
95.3062516594921	95.2753931018542	95.1643258475245	94.9624641634662	94.6438316175526	94.1506668012977	93.3501676407272	91.9039780752548	88.7417474499706	78.1585387817026
95.2872680964024	95.2563823490735	95.1450649990172	94.942698193274	94.6232053471619	94.1285828395921	93.3254726662216	91.8741479117989	88.699981518224	78.0739835491318
95.2683067707456	95.2373947895179	95.1258293710216	94.9229603994807	94.6026109613123	94.1065351573897	93.3008194439443	91.8443676217917	88.6582809881669	77.9895291801392
95.2493676990269	95.2184304346297	95.106618963807	94.9032507635412	94.5820484148879	94.084523677258	93.2762078609715	91.8146370526543	88.6166456510144	77.9051753363278
95.2304508974953	95.1994892955584	95.0874337773115	94.8835692665995	94.5615176625929	94.0625483218363	93.2516378047815	91.7849560525718	88.5750752991717	77.8209216813424
95.2115563821422	95.1805713831608	95.0682738111446	94.8639158894923	94.5410186589563	94.0406090138391	93.2271091632544	91.7553244704872	88.5335697262232	77.7367678808498
95.1926841687	95.1616767080009	95.0491390645885	94.8442906127535	94.5205513583367	94.0187056760588	93.202621824671	91.7257421560964	88.492128726922	77.6527136025195
95.1738342726405	95.1428052803498	95.0300295366004	94.8246934166177	94.5001157149273	93.9968382313693	93.1781756777124	91.6962089598427	88.4507520971795	77.5687585160043
95.1550067091743	95.1239571101858	95.010945225815	94.8051242810249	94.4797116827601	93.9750066027283	93.153770611459	91.6667247329115	88.4094396340549	77.4849022929214
95.136201493249	95.1051322071938	94.9918861305455	94.7855831856239	94.4593392157108	93.9532107131805	93.1294065153898	91.6372893272249	88.3681911357454	77.401144606834
95.1174186395485	95.0863305807665	94.9728522487868	94.7660701097769	94.4389982675029	93.9314504858602	93.1050832793814	91.6079025954367	88.3270064015758	77.3174851332324
95.0986581624916	95.0675522400032	94.9538435782168	94.7465850325627	94.4186887917125	93.9097258439941	93.0808007937073	91.5785643909269	88.2858852319889	77.2339235495166
95.0799200762313	95.0487971937112	94.9348601161988	94.7271279327812	94.3984107417723	93.8880367109036	93.0565589490369	91.5492745677971	88.2448274285355	77.1504595349779
95.0612043946537	95.0300654504049	94.9159018597835	94.7076987889568	94.3781640709759	93.8663830100078	93.0323576364346	91.5200329808648	88.2038327938648	77.0670927707811
95.042511131377	95.0113570183069	94.8969688057111	94.6882975793425	94.3579487324819	93.8447646648253	93.008196747359	91.4908394856587	88.162901131715	76.9838229399481
95.0238402997511	94.9926719053476	94.8780609504136	94.6689242819235	94.3377646793182	93.823181598977	92.9840761736614	91.4616939384137	88.1220322469038	76.9006497273396
95.0051919128561	94.9740101191661	94.8591782900165	94.6495788744209	94.3176118643857	93.8016337361884	92.9599958075857	91.4325961960657	88.0812259453191	76.8175728196391
94.9865659835022	94.9553716671102	94.8403208203414	94.6302613342957	94.2974902404622	93.7801210002916	92.9359555417663	91.4035461162472	88.04048203391	76.7345919053356
94.9679625242289	94.9367565562368	94.8214885369077	94.6109716387519	94.2773997602068	93.7586433152276	92.911955269228	91.3745435572818	87.9998003206777	76.6517066747078
94.949381547304	94.9181647933125	94.8026814349352	94.5917097647407	94.2573403761629	93.7372006050483	92.8879948833842	91.3455883781799	87.9591806146661	76.5689168198073
94.9308230647235	94.8995963848139	94.7838995093458	94.5724756889634	94.2373120407626	93.7157927939187	92.8640742780362	91.3166804386337	87.9186227259538	76.4862220344429
94.9122870882108	94.8810513369284	94.7651427547658	94.5532693878758	94.2173147063297	93.6944198061185	92.8401933473723	91.2878195990124	87.8781264656449	76.403622014165
94.8937736292163	94.8625296555544	94.7464111655283	94.5340908376909	94.1973483250841	93.6730815660447	92.8163519859661	91.2590057203577	87.8376916458603	76.3211164562496
94.875282698917	94.8440313463019	94.7277047356749	94.5149400143828	94.1774128491444	93.6517779982126	92.7925500887756	91.2302386643789	87.7973180797295	76.2387050596834
94.8568143082161	94.8255564144935	94.7090234589583	94.49581689369	94.157508230532	93.6305090272582	92.7687875511423	91.2015182934488	87.757005581382	76.1563875251482
94.8383684677426	94.8071048651645	94.6903673288441	94.4767214511187	94.1376344211744	93.6092745779396	92.7450642687896	91.1728444705983	87.7167539659392	76.0741635550064
94.8199451878511	94.788676703064	94.671736338513	94.4576536619465	94.1177913729083	93.5880745751389	92.7213801378222	91.1442170595127	87.676563049506	75.992032853286
94.8015444786217	94.7702719326553	94.6531304808635	94.4386135012251	94.0979790374828	93.5669089438638	92.6977350547239	91.1156359245268	87.6364326491627	75.9099951256658
94.7831663498594	94.7518905581171	94.6345497485131	94.4196009437843	94.0781973665632	93.5457776092489	92.6741289163576	91.0871009306204	87.5963625829573	75.8280500794616
94.7648108110944	94.7335325833435	94.6159941338013	94.4006159642345	94.0584463117334	93.5246804965577	92.6505616199632	91.0586119434142	87.5563526698972	75.7461974236116
94.7464778715819	94.7151980119455	94.5974636287914	94.3816585369707	94.0387258244995	93.5036175311836	92.6270330631565	91.0301688291652	87.5164027299419	75.6644368686625
94.7281675403015	94.6968868472515	94.5789582252726	94.3627286361748	94.0190358562925	93.4825886386515	92.6035431439282	91.0017714547624	87.4765125839945	75.5827681267555
94.7098798259582	94.6785990923083	94.5604779147624	94.3438262358196	93.9993763584717	93.4615937446195	92.5800917606426	90.9734196877224	87.4366820538949	75.501190911613
94.6916147369814	94.6603347498817	94.5420226885085	94.3249513096713	93.9797472823272	93.4406327748796	92.5566788120361	90.9451133961856	87.396910962412	75.4197049385249
94.6733722815256	94.6420938224578	94.5235925374912	94.3061038312927	93.960148579083	93.4197056553596	92.5333041972161	90.9168524489114	87.3571991332358	75.3383099243352
94.6551524674704	94.6238763122434	94.5051874524251	94.2872837740464	93.9405801998996	93.3988123121239	92.5099678156596	90.8886367152744	87.3175463909707	75.257005587429
94.6369553024203	94.6056822211676	94.4868074237621	94.2684911110976	93.9210420958772	93.377952671375	92.4866695672118	90.8604660652602	87.2779525611278	75.1757916477195
94.6187807937054	94.5875115508822	94.4684524416925	94.2497258154172	93.901534218058	93.3571266594545	92.4634093520853	90.8323403694611	87.2384174701179	75.0946678266352
94.6006289483812	94.5693643027629	94.450122496148	94.2309878597847	93.8820565174289	93.3363342028441	92.4401870708582	90.8042594990725	87.1989409452443	75.0136338471073
94.582499773229	94.5512404779106	94.4318175768032	94.2122772167911	93.8626089449243	93.3155752281673	92.417002624473	90.7762233258881	87.1595228146959	74.9326894335566
94.5643932747564	94.5331400771519	94.4135376730783	94.1935938588416	93.8431914514288	93.2948496621895	92.3938559142351	90.7482317222967	87.1201629075401	74.8518343118823
94.5463094591971	94.5150631010407	94.3952827741408	94.1749377581586	93.8238039877792	93.2741574318196	92.370746841812	90.7202845612778	87.0808610537159	74.7710682094487
94.5282483325118	94.4970095498588	94.3770528689077	94.1563088867846	93.8044465047675	93.2534984641112	92.3476753092313	90.6923817163978	87.0416170840274	74.6903908550736
94.5102099003885	94.4789794236175	94.3588479460478	94.1377072165848	93.785118953143	93.2328726862628	92.3246412188796	90.6645230618058	87.0024308301366	74.6098019790166
94.4921941682424	94.4609727220581	94.3406679939837	94.1191327192498	93.7658212836148	93.2122800256192	92.3016444735015	90.6367084722304	86.9633021245572	74.5293013129667
94.4742011412172	94.4429894446538	94.3225130008939	94.1005853662984	93.7465534468543	93.1917204096723	92.2786849761974	90.6089378229753	86.924230800648	74.4488885900315
94.4562308241849	94.4250295906101	94.3043829547149	94.0820651290803	93.7273153934971	93.1711937660619	92.2557626304232	90.5812109899156	86.885216692606	74.3685635447249
94.4382832217468	94.4070931588666	94.2862778431433	94.0635719787787	93.7081070741458	93.1507000225765	92.2328773399881	90.5535278494943	86.8462596354605	74.2883259129564
94.4203583382335	94.3891801480978	94.2681976536378	94.0451058864128	93.6889284393716	93.130239107154	92.2100290090534	90.5258882787183	86.8073594650664	74.2081754320192
94.4024561777061	94.3712905567145	94.2501423734216	94.0266668228406	93.6697794397169	93.1098109478824	92.1872175421316	90.4982921551549	86.7685160180979	74.12811184058
94.3845767439565	94.3534243828647	94.2321119894839	94.0082547587613	93.6506600256974	93.0894154730008	92.1644428440844	90.4707393569277	86.7297291320426	74.048134878667
94.366720040508	94.3355816244356	94.2141064885826	93.9898696647179	93.6315701478041	93.0690526108998	92.1417048201218	90.4432297627139	86.6909986451951	73.9682442876601
94.3488860706161	94.317762279054	94.1961258572461	93.9715115110995	93.6125097565052	93.0487222901222	92.1190033758003	90.4157632517395	86.6523243966509	73.8884398102793
94.3310748372691	94.2999663440878	94.178170081775	93.9531802681441	93.5934788022484	93.0284244393635	92.0963384170219	90.3883397037767	86.6137062263005	73.8087211905747
94.3132863431889	94.2821938166479	94.1602391482448	93.9348759059408	93.5744772354628	93.0081589874729	92.0737098500324	90.3609589991398	86.5751439748234	73.7290881739158
94.2955205908317	94.2644446935885	94.1423330425075	93.9165983944324	93.5555050065606	92.9879258634533	92.0511175814205	90.3336210186821	86.5366374836823	73.6495405069811
94.2777775823887	94.2467189715092	94.1244517501936	93.8983477034172	93.5365620659394	92.9677249964626	92.0285615181157	90.3063256437919	86.498186595117	73.5700779377482
94.2600573197872	94.229016646756	94.1065952567145	93.8801238025524	93.5176483639839	92.9475563158132	92.0060415673875	90.2790727563895	86.459791152139	73.4907002154831
94.2423598046908	94.2113377154226	94.088763547264	93.8619266613553	93.4987638510674	92.9274197509734	91.9835576368439	90.2518622389236	86.4214509985255	73.4114070907308
94.2246850385011	94.1936821733519	94.0709566068208	93.8437562492064	93.4799084775542	92.9073152315675	91.9611096344296	90.224693974368	86.3831659788141	73.3321983153051
94.207033022358	94.1760500161371	94.0531744201501	93.8256125353513	93.4610821938011	92.8872426873762	91.9386974684253	90.197567846218	86.3449359382967	73.2530736422788
94.1894037571404	94.1584412391235	94.035416971806	93.807495488903	93.4422849501589	92.8672020483369	91.9163210474458	90.1704837384873	86.3067607230145	73.1740328259742
94.1717972434677	94.1408558374094	94.0176842461328	93.7894050788443	93.4235166969744	92.8471932445447	91.8939802804389	90.1434415357046	86.2686401797521	73.0950756219535
94.1542134817004	94.1232938058477	93.9999762272679	93.7713412740295	93.404777384592	92.827216206252	91.8716750766835	90.1164411229103	86.2305741560325	73.016201787009
94.1366524719412	94.1057551390474	93.9822928991428	93.7533040431873	93.3860669633553	92.8072708638692	91.8494053457892	90.0894823856534	86.1925625001114	72.9374110791544
94.1191142140356	94.0882398313749	93.964634245486	93.7352933549223	93.3673853836089	92.7873571479654	91.8271709976938	90.0625652099879	86.1546050609719	72.8587032576151
94.1015987075734	94.0707478769553	93.9470002498239	93.7173091777173	93.3487325956994	92.767474989268	91.8049719426627	90.0356894824701	86.1167016883197	72.7800780828188
94.0841059518894	94.0532792696739	93.9293908954838	93.6993514799357	93.3301085499778	92.7476243186635	91.7828080912872	90.008855090155	86.0788522325773	72.7015353163873
94.0666359460644	94.0358340031778	93.9118061655949	93.6814202298231	93.3115131968003	92.7278050671976	91.7606793544832	89.9820619205934	86.0410565448792	72.6230747211265
94.0491886889266	94.0184120708771	93.8942460430909	93.6635153955096	93.2929464865302	92.7080171660755	91.7385856434898	89.9553098618285	86.0033144770669	72.5446960610186
94.0317641790522	94.0010134659464	93.8767105107115	93.6456369450117	93.2744083695391	92.6882605466622	91.7165268698678	89.9285988023934	85.9656258816836	72.4663991012123
94.0143624147667	93.9836381813264	93.8591995510044	93.6277848462346	93.2558987962086	92.6685351404825	91.6945029454987	89.9019286313073	85.9279906119692	72.3881836080149
93.9969833941462	93.966286209725	93.8417131463272	93.6099590669736	93.2374177169314	92.6488408792215	91.672513782583	89.8752992380728	85.8904085218556	72.3100493488836
93.979627115018	93.9489575436192	93.8242512788495	93.5921595749166	93.2189650821131	92.6291776947246	91.6505592936386	89.8487105126729	85.8528794659617	72.2319960924164
93.9622935749623	93.9316521752561	93.8068139305541	93.5743863376458	93.2005408421731	92.6095455189976	91.6286393915003	89.8221623455682	85.8154032995886	72.1540236083446
93.9449827713128	93.914370096655	93.7894010832397	93.5566393226395	93.1821449475462	92.5899442842071	91.6067539893174	89.7956546276934	85.7779798787146	72.0761316675238
93.9276947011584	93.8971112996081	93.7720127185221	93.538918497274	93.1637773486838	92.5703739226804	91.5849030005531	89.7691872504546	85.7406090599907	71.998320041926
93.9104293613439	93.8798757756825	93.7546488178364	93.5212238288259	93.1454379960554	92.5508343669058	91.5630863389827	89.7427601057267	85.7032907007358	71.9205885046316
93.8931867484715	93.8626635162217	93.7373093624387	93.5035552844731	93.1271268401494	92.5313255495327	91.5413039186926	89.71637308585	85.666024658932	71.8429368298207
93.8759668589017	93.8454745123467	93.7199943334078	93.4859128312974	93.1088438314749	92.5118474033714	91.5195556540786	89.6900260836276	85.6288107932202	71.7653647927658
93.858769688755	93.8283087549579	93.7027037116472	93.4682964362859	93.0905889205623	92.4923998613936	91.4978414598447	89.6637189923226	85.591648962895	71.6878721698238
93.8415952339124	93.8111662347363	93.6854374778867	93.4507060663327	93.0723620579651	92.4729828567322	91.4761612510019	89.6374517056549	85.554539027901	71.6104587384278
93.8244434900173	93.7940469421451	93.6681956126845	93.4331416882411	93.0541631942605	92.4535963226814	91.4545149428665	89.611224117799	85.5174808488277	71.5331242770798
93.8073144524763	93.7769508674314	93.6509780964286	93.4156032687247	93.0359922800511	92.4342401926969	91.4329024510592	89.5850361233805	85.4804742869051	71.4558685653429
93.7902081164609	93.7598780006273	93.6337849093388	93.3980907744097	93.0178492659654	92.4149144003957	91.4113236915034	89.5588876174739	85.4435192039997	71.3786913838335
93.7731244769081	93.7428283315517	93.6166160314682	93.380604171836	92.9997341026595	92.3956188795561	91.3897785804241	89.5327784955997	85.4066154626097	71.3015925142142
93.7560635285224	93.7258018498116	93.5994714427055	93.3631434274595	92.9816467408177	92.376353564118	91.3682670343465	89.5067086537215	85.3697629258609	71.2245717391861
93.7390252657766	93.7087985448038	93.5823511227759	93.3457085076534	92.9635871311538	92.3571183881825	91.3467889700944	89.4806779882436	85.3329614575026	71.1476288424816
93.7220096829131	93.6918184057164	93.5652550512437	93.3282993787096	92.9455552244121	92.3379132860122	91.3253443047896	89.4546863960079	85.296210921903	71.0707636088569
93.7050167739457	93.6748614215302	93.5481832075133	93.3109160068408	92.9275509713684	92.3187381920311	91.3039329558496	89.4287337742918	85.2595111840453	70.9939758240852
93.68804653266	93.65792758102	93.5311355708312	93.2935583581819	92.909574322831	92.2995930408242	91.2825548409872	89.4028200208051	85.2228621095234	70.917265274949
93.6710989526158	93.6410168727568	93.5141121202879	93.2762263987914	92.8916252296417	92.2804777671382	91.2612098782087	89.3769450336877	85.1862635645379	70.8406317492337
93.6541740271475	93.6241292851083	93.4971128348192	93.2589200946531	92.8737036426765	92.2613923058806	91.2398979858126	89.3511087115067	85.149715415892	70.7640750357201
93.6372717493659	93.6072648062414	93.4801376932079	93.2416394116777	92.8558095128472	92.2423365921201	91.2186190823884	89.3253109532541	85.1132175309873	70.6875949241775
93.6203921121596	93.5904234241231	93.4631866740858	93.2243843157043	92.8379427911014	92.2233105610865	91.1973730868154	89.2995516583441	85.07676977782	70.6111912053572
93.6035351081961	93.5736051265222	93.4462597559352	93.2071547725018	92.8201034284242	92.2043141481705	91.1761599182613	89.2738307266107	85.040372024977	70.5348636709855
93.586700729923	93.5568099010107	93.4293569170901	93.1899507477702	92.8022913758387	92.1853472889234	91.1549794961808	89.2481480583049	85.0040241416317	70.4586121137568
93.5698889695699	93.5400377349655	93.4124781357386	93.1727722071426	92.7845065844068	92.1664099190576	91.1338317403145	89.2225035540927	84.9677259975404	70.3824363273273
93.5530998191495	93.5232886155699	93.3956233899239	93.1556191161862	92.7667490052305	92.1475019744459	91.1127165706876	89.1968971150519	84.931477463038	70.3063361063079
93.5363332704584	93.5065625298147	93.3787926575462	93.1384914404039	92.7490185894519	92.1286233911213	91.0916339076086	89.1713286426706	84.8952784090349	70.2303112462583
93.5195893150797	93.4898594645002	93.3619859163642	93.1213891452357	92.7313152882552	92.1097741052775	91.0705836716679	89.1457980388439	84.8591287070126	70.1543615436802
93.5028679443832	93.4731794062374	93.3452031439967	93.10431219606	92.7136390528662	92.0909540532681	91.0495657837367	89.1203052058717	84.8230282290201	70.0784867960105
93.4861691495272	93.4565223414499	93.3284443179242	93.0872605581951	92.6959898345542	92.072163171607	91.0285801649657	89.0948500464569	84.7869768476704	70.0026868016158
93.4694929214603	93.4398882563746	93.3117094154905	93.0702341969006	92.678367584632	92.0534013969675	91.0076267367838	89.069432463702	84.7509744361365	69.9269613597855
93.4528392509222	93.4232771370641	93.294998413904	93.0532330773785	92.660772254457	92.0346686661831	90.986705420897	89.0440523611078	84.7150208681481	69.8513102707256
93.4362081284451	93.4066889693876	93.2783112902397	93.0362571647749	92.643203795432	92.0159649162464	90.9658161392868	89.01870964257	84.6791160179876	69.7757333355528
93.4195995443557	93.3901237390328	93.2616480214405	93.019306424181	92.6256621590056	91.9972900843094	90.9449588142096	88.9934042123779	84.6432597604868	69.7002303562881
93.4030134887759	93.3735814315068	93.2450085843184	93.0023808206344	92.6081472966734	91.9786441076834	90.9241333681945	88.9681359752113	84.6074519710233	69.6248011358512
93.3864499516246	93.3570620321382	93.2283929555567	92.9854803191209	92.5906591599781	91.9600269238385	90.9033397240431	88.9429048361386	84.5716925255167	69.5494454780537
93.3699089226191	93.3405655260783	93.2118011117108	92.9686048845749	92.5731977005108	91.9414384704035	90.8825778048276	88.9177107006145	84.5359813004257	69.474163187594
93.3533903912762	93.3240918983027	93.1952330292102	92.9517544818815	92.555762869911	91.9228786851657	90.8618475338898	88.8925534744775	84.5003181727439	69.3989540700509
93.3368943469138	93.3076411336124	93.1786886843599	92.9349290758772	92.5383546198679	91.9043475060707	90.8411488348398	88.8674330639482	84.4647030199971	69.323817931878
93.3204207786526	93.291213216636	93.1621680533416	92.9181286313513	92.5209729021207	91.8858448712222	90.820481631555	88.8423493756263	84.4291357202393	69.2487545803976
93.3039696754169	93.2748081318303	93.1456711122153	92.9013531130472	92.5036176684592	91.8673707188818	90.7998458481786	88.8173023164892	84.3936161520497	69.1737638237954
93.2875410259364	93.2584258634824	93.129197836921	92.8846024856633	92.4862888707246	91.8489249874685	90.7792414091187	88.7922917938891	84.3581441945292	69.0988454711145
93.2711348187478	93.2420663957111	93.1127482032798	92.8678767138548	92.4689864608098	91.8305076155589	90.7586682390467	88.7673177155514	84.322719727297	69.02399933225
93.2547510421956	93.2257297124679	93.0963221869956	92.851175762234	92.4517103906605	91.8121185418866	90.7381262628965	88.7423799895722	84.2873426304876	68.9492252179431
93.238389684434	93.209415797539	93.0799197636562	92.8344995953723	92.4344606122751	91.793757705342	90.7176154058633	88.7174785244163	84.2520127847473	68.8745229397759
93.2220507334283	93.1931246345465	93.063540908735	92.8178481778007	92.4172370777059	91.7754250449722	90.6971355934019	88.692613228915	84.2167300712312	68.7998923101659
93.205734176956	93.1768562069498	93.0471855975924	92.8012214740114	92.4000397390593	91.7571204999806	90.6766867512264	88.667784012264	84.1814943715996	68.7253331423602
93.1894400026084	93.1606104980472	93.0308538054771	92.7846194484585	92.3828685484964	91.7388440097266	90.6562688053081	88.6429907840216	84.1463055680152	68.6508452504307
93.1731681977922	93.1443874909771	93.0145455075273	92.7680420655595	92.3657234582337	91.7205955137257	90.6358816818749	88.618233454106	84.1111635431399	68.5764284492681
93.1569187497305	93.1281871687197	92.9982606787724	92.751489289696	92.3486044205432	91.7023749516487	90.6155253074103	88.5935119327938	84.0760681801316	68.5020825545774
93.1406916454646	93.1120095140984	92.9819992941343	92.7349610852153	92.3315113877534	91.6841822633216	90.5951996086514	88.5688261307177	84.041019362641	68.4278073828717
93.1244868718551	93.0958545097808	92.9657613284286	92.7184574164308	92.3144443122495	91.6660173887254	90.5749045125887	88.5441759588646	84.0060169748086	68.353602751468
93.1083044155836	93.0797221382809	92.9495467563659	92.7019782476236	92.2974031464741	91.647880267996	90.5546399464645	88.5195613285735	83.971060901262	68.2794684784815
93.0921442631539	93.0636123819598	92.9333555525536	92.6855235430433	92.2803878429273	91.6297708414235	90.5344058377718	88.4949821515334	83.9361510271124	68.2054043828202
93.0760064008933	93.0475252230273	92.9171876914965	92.669093266909	92.2633983541676	91.6116890494521	90.5142021142529	88.4704383397816	83.9012872379516	68.1314102841808
93.0598908149543	93.0314606435436	92.9010431475987	92.6526873834106	92.2464346328123	91.5936348326798	90.494028703899	88.4459298057013	83.8664694198497	68.0574860030427
93.043797491316	93.0154186254203	92.8849218951649	92.6363058567093	92.2294966315374	91.5756081318581	90.4738855349482	88.4214564620203	83.8316974593513	67.9836313606636
93.0277264157852	92.9993991504221	92.868823908401	92.619948650939	92.2125843030788	91.5576088878918	90.4537725358851	88.3970182218081	83.7969712434731	67.9098461790744
93.0116775739979	92.983402200168	92.8527491614165	92.6036157302073	92.1956976002324	91.5396370418384	90.4336896354392	88.3726149984751	83.7622906597009	67.8361302810743
92.995650951421	92.9674277561328	92.8366976282247	92.5873070585962	92.1788364758542	91.5216925349081	90.4136367625841	88.3482467057697	83.7276555959867	67.762483490226
92.9796465333531	92.9514757996483	92.8206692827446	92.571022600163	92.1620008828613	91.5037753084633	90.3936138465362	88.323913257777	83.6930659407458	67.6889056308509
92.9636643049266	92.9355463119048	92.804664098802	92.5547623189419	92.145190774232	91.4858853040182	90.3736208167535	88.2996145689166	83.6585215828541	67.6153965280243
92.9477042511085	92.9196392739528	92.7886820501309	92.538526178944	92.1284061030059	91.4680224632388	90.353657602935	88.275350553941	83.6240224116454	67.5419560075707
92.9317663567022	92.9037546667035	92.7727231103743	92.522314144159	92.111646822285	91.4501867279423	90.3337241350191	88.2511211279335	83.5895683169081	67.468583896059
92.9158506063485	92.887892470931	92.756787253086	92.5061261785558	92.0949128852334	91.4323780400969	90.3138203431827	88.2269262063064	83.555159188883	67.3952800207983
92.8999569845274	92.8720526672733	92.7408744517313	92.4899622460832	92.0782042450779	91.4145963418213	90.29394615784	88.2027657047993	83.5207949182606	67.3220442098326
92.8840854755591	92.8562352362336	92.7249846796886	92.4738223106712	92.0615208551086	91.3968415753846	90.2741015096418	88.1786395394771	83.4864753961777	67.2488762919369
92.8682360636055	92.8404401581817	92.7091179102506	92.4577063362317	92.0448626686788	91.3791136832058	90.2542863294739	88.1545476267284	83.4522005142155	67.1757760966121
92.8524087326717	92.8246674133554	92.6932741166249	92.4416142866593	92.0282296392056	91.3614126078536	90.2345005484566	88.1304898832635	83.4179701643967	67.1027434540811
92.8366034666073	92.8089169818618	92.6774532719362	92.4255461258321	92.0116217201705	91.3437382920459	90.2147440979431	88.1064662261127	83.3837842391823	67.0297781952838
92.8208202491077	92.7931888436785	92.6616553492265	92.409501817613	91.995038865119	91.3260906786495	90.1950169095188	88.0824765726247	83.34964263147	66.9568801518731
92.8050590637153	92.777482978655	92.6458803214569	92.3934813258499	91.9784810276617	91.3084697106799	90.175318915	88.0585208404644	83.3155452345907	66.8840491562103
92.7893198938213	92.761799366514	92.6301281615084	92.3774846143771	91.961948161474	91.2908753313008	90.1556500464334	88.0345989476116	83.2814919423062	66.8112850413607
92.7736027226668	92.7461379868529	92.6143988421834	92.3615116470157	91.9454402202967	91.2733074838237	90.1360102360942	88.0107108123592	83.247482648807	66.7385876410896
92.7579075333438	92.7304988191445	92.5986923362065	92.3455623875748	91.9289571579366	91.2557661117077	90.1163994164857	87.9868563533113	83.2135172487093	66.6659567898576
92.7422343087973	92.7148818427393	92.5830086162258	92.3296367998518	91.9124989282659	91.2382511585593	90.0968175203381	87.9630354893815	83.1795956370524	66.593392322817
92.726583031826	92.6992870368655	92.5673476548139	92.3137348476337	91.8960654852236	91.2207625681314	90.0772644806076	87.9392481397914	83.1457177092968	66.5208940758067
92.710953685084	92.6837143806315	92.5517094244693	92.2978564946977	91.8796567828146	91.2033002843239	90.0577402304751	87.9154942240687	83.1118833613212	66.4484618853489
92.6953462510816	92.6681638530263	92.5360938976172	92.2820017048118	91.8632727751111	91.1858642511824	90.0382447033454	87.8917736620459	83.07809248942	66.3760955886446
92.6797607121876	92.6526354329213	92.5205010466108	92.2661704417358	91.846913416252	91.1684544128985	90.0187778328461	87.8680863738581	83.0443449903013	66.3037950235692
92.6641970506296	92.6371290990712	92.5049308437321	92.2503626692221	91.8305786604437	91.1510707138091	89.9993395528266	87.8444322799418	83.0106407610841	66.2315600286691
92.648655248496	92.6216448301155	92.4893832611934	92.2345783510161	91.81426846196	91.1337130983962	89.9799297973572	87.8208113010329	82.976979699296	66.159390443157
92.6331352877368	92.6061826045795	92.4738582711382	92.2188174508573	91.7979827751426	91.1163815112865	89.960548500728	87.7972233581654	82.9433617028708	66.0872861069084
92.6176371501654	92.5907424008759	92.458355845642	92.2030799324799	91.781721554401	91.099075897251	89.941195597448	87.7736683726698	82.9097866701463	66.0152468604574
92.6021608174595	92.5753241973056	92.4428759567137	92.1873657596135	91.7654847542132	91.0817962012047	89.921871022244	87.7501462661711	82.8762544998616	65.9432725449929
92.5867062711629	92.5599279720593	92.4274185762966	92.1716748959838	91.7492723291255	91.064542368206	89.9025747100597	87.7266569605877	82.842765091155	65.8713630023543
92.5712734926859	92.5445537032185	92.4119836762694	92.1560073053134	91.7330842337531	91.0473143434568	89.8833065960547	87.7032003781293	82.8093183435619	65.7995180750282
92.5558624633077	92.5292013687568	92.396571228447	92.1403629513224	91.7169204227798	91.0301120723017	89.8640666156035	87.6797764412959	82.7759141570118	65.7277376061442
92.5404731641768	92.513870946541	92.3811812045819	92.1247417977292	91.7007808509587	91.0129355002278	89.8448547042948	87.6563850728758	82.742552431827	65.6560214394711
92.5251055763127	92.4985624143325	92.3658135763649	92.1091438082511	91.6846654731122	90.9957845728643	89.8256707979301	87.6330261959443	82.7092330687193	65.5843694194132
92.509759680607	92.4832757497883	92.3504683154265	92.0935689466049	91.6685742441322	90.9786592359822	89.8065148325228	87.6096997338621	82.6759559687888	65.5127813910066
92.494435457825	92.4680109304622	92.3351453933374	92.0780171765077	91.6525071189803	90.9615594354938	89.7873867442979	87.5864056102737	82.6427210335207	65.4412571999153
92.4791328886063	92.4527679338062	92.3198447816099	92.0624884616777	91.6364640526879	90.9444851174524	89.76828646969	87.5631437491058	82.6095281647838	65.3697966924277
92.4638519534669	92.4375467371713	92.3045664516985	92.0469827658344	91.6204450003565	90.9274362280521	89.7492139453434	87.5399140745662	82.5763772648279	65.2983997154527
92.4485926327995	92.4223473178092	92.2893103750015	92.0315000526996	91.6044499171581	90.9104127136271	89.7301691081105	87.5167165111419	82.5432682362818	65.2270661165164
92.4333549068758	92.4071696528727	92.2740765228612	92.016040285998	91.5884787583347	90.8934145206514	89.7111518950509	87.4935509835977	82.5102009821512	65.1557957437581
92.4181387558468	92.3920137194176	92.2588648665654	92.0006034294578	91.572531479199	90.8764415957387	89.6921622434309	87.470417416975	82.4771754058163	65.084588445927
92.4029441597445	92.3768794944035	92.2436753773482	91.9851894468111	91.5566080351347	90.8594938856417	89.6732000907222	87.4473157365898	82.4441914110298	65.0134440723786
92.3877710984831	92.361766954695	92.2285080263909	91.969798301795	91.5407083815959	90.8425713372519	89.6542653746011	87.4242458680319	82.4112489019152	64.9423624730711
92.3726195518603	92.3466760770626	92.2133627848229	91.9544299581517	91.5248324741083	90.8256738975991	89.6353580329475	87.4012077371629	82.3783477829637	64.8713434985618
92.3574894995581	92.3316068381842	92.1982396237227	91.9390843796294	91.5089802682684	90.8088015138513	89.6164780038441	87.378201270115	82.3454879590334	64.800387000004
92.3423809211445	92.3165592146461	92.183138514119	91.9237615299827	91.4931517197441	90.791954133314	89.5976252255756	87.3552263932897	82.312669335346	64.7294928291431
92.3272937960745	92.301533182944	92.1680594269913	91.9084613729736	91.4773467842749	90.7751317034297	89.5787996366277	87.332283033356	82.2798918174856	64.6586608383135
92.3122281036912	92.2865287194842	92.1530023332709	91.8931838723713	91.4615654176716	90.7583341717783	89.5600011756859	87.3093711172496	82.2471553113965	64.5878908804351
92.2971838232271	92.2715458005846	92.1379672038419	91.8779289919537	91.4458075758172	90.7415614860757	89.5412297816351	87.2864905721709	82.2144597233807	64.5171828090098
92.2821609338055	92.2565844024761	92.1229540095421	91.8626966955072	91.4300732146661	90.7248135941743	89.5224853935584	87.2636413255838	82.1818049600967	64.4465364781186
92.267159414441	92.241644501303	92.1079627211637	91.8474869468278	91.4143622902449	90.7080904440618	89.5037679507366	87.2408233052146	82.1491909285567	64.3759517424175
92.2521792440417	92.226726073125	92.0929933094544	91.8322997097213	91.3986747586523	90.6913919838617	89.4850773926467	87.2180364390503	82.1166175361251	64.3054284571352
92.2372204014093	92.2118290939176	92.0780457451182	91.8171349480038	91.383010576059	90.6747181618323	89.4664136589616	87.1952806553373	82.0840846905166	64.2349664780689
92.2222828652412	92.1969535395734	92.063119998816	91.8019926255028	91.3673696987084	90.6580689263664	89.4477766895488	87.1725558825803	82.0515922997939	64.1645656615816
92.2073666141308	92.1820993859031	92.048216041167	91.7868727060571	91.3517520829158	90.6414442259911	89.4291664244701	87.1498620495406	82.019140272366	64.0942258645989
92.1924716265695	92.1672666086367	92.033333842749	91.7717751535174	91.3361576850695	90.6248440093674	89.4105828039801	87.127199085235	81.9867285169862	64.0239469446055
92.177597880947	92.1524551834242	92.0184733740997	91.7566999317474	91.3205864616301	90.6082682252897	89.3920257685258	87.1045669189343	81.9543569427503	63.9537287596422
92.1627453555532	92.1376650858373	92.0036346057171	91.7416470046236	91.3050383691309	90.5917168226856	89.3734952587455	87.0819654801624	81.9220254590946	63.8835711683028
92.1479140285788	92.1228962913694	91.9888175080607	91.7266163360361	91.2895133641782	90.5751897506152	89.354991215468	87.0593946986944	81.889733975794	63.8134740297308
92.1331038781167	92.1081487754379	91.9740220515523	91.7116078898893	91.2740114034511	90.5586869582711	89.336513579712	87.0368545045557	81.8574824029603	63.7434372036165
92.118314882163	92.0934225133839	91.9592482065763	91.6966216301021	91.2585324437016	90.5422083949778	89.318062292685	87.0143448280206	81.8252706510401	63.6734605501939
92.1035470186181	92.0787174804745	91.9444959434813	91.6816575206085	91.2430764417547	90.5257540101915	89.2996372957825	86.9918655996112	81.7930986308133	63.6035439302375
92.088800265288	92.0640336519026	91.9297652325801	91.666715525358	91.2276433545086	90.5093237534993	89.2812385305872	86.9694167500956	81.760966253391	63.5336872050594
92.0740745998851	92.049371002789	91.9150560441514	91.6517956083163	91.2122331389347	90.4929175746195	89.2628659388683	86.9469982104874	81.7288734302136	63.4638902365061
92.0593700000295	92.0347295081824	91.9003683484396	91.6368977334657	91.1968457520776	90.4765354234005	89.2445194625805	86.9246099120439	81.6968200730494	63.3941528869558
92.0446864432502	92.0201091430611	91.8857021156563	91.6220218648051	91.1814811510553	90.4601772498211	89.2261990438633	86.9022517862648	81.6648060939925	63.3244750193154
92.0300239069858	92.0055098823338	91.8710573159808	91.6071679663514	91.1661392930591	90.4438430039895	89.2079046250402	86.8799237648915	81.6328314054611	63.2548564970171
92.015382368586	91.9909317008404	91.856433919561	91.592336002139	91.1508201353538	90.4275326361434	89.1896361486178	86.8576257799053	81.6008959201957	63.1852971840161
92.0007618053123	91.9763745733529	91.8418318965139	91.5775259362209	91.1355236352777	90.4112460966494	89.171393557285	86.8353577635266	81.5689995512576	63.1157969447874
91.9861621943392	91.961838474577	91.8272512169266	91.5627377326688	91.1202497502425	90.3949833360026	89.1531767939123	86.8131196482133	81.5371422120268	63.0463556443227
91.9715835127557	91.9473233791521	91.812691850857	91.5479713555738	91.1049984377338	90.3787443048265	89.134985801551	86.7909113666599	81.5053238162004	62.9769731481281
91.9570257375655	91.9328292616531	91.7981537683346	91.5332267690464	91.0897696553105	90.3625289538722	89.1168205234324	86.7687328517963	81.473544277791	62.9076493222207
91.9424888456887	91.9183560965908	91.7836369393608	91.5185039372177	91.0745633606056	90.3463372340183	89.0986809029669	86.7465840367863	81.4418035111252	62.8383840331261
91.9279728139625	91.9039038584131	91.7691413339105	91.5038028242388	91.0593795113255	90.3301690962705	89.0805668837433	86.7244648550268	81.4101014308412	62.7691771478757
91.9134776191426	91.8894725215057	91.754666921932	91.4891233942821	91.0442180652505	90.3140244917613	89.0624784095282	86.7023752401464	81.3784379518878	62.7000285340034
91.8990032379038	91.8750620601935	91.740213673348	91.4744656115413	91.0290789802348	90.2979033717493	89.0444154242649	86.6803151260043	81.3468129895225	62.6309380595433
91.8845496468414	91.8606724487408	91.7257815580564	91.4598294402319	91.0139622142063	90.2818056876194	89.0263778720729	86.6582844466891	81.3152264593099	62.5619055930272
91.8701168224716	91.8463036613528	91.711370545931	91.4452148445916	90.9988677251668	90.2657313908816	89.0083656972469	86.6362831365177	81.28367827712	62.4929310034809
91.8557047412336	91.8319556721764	91.6969806068222	91.4306217888806	90.9837954711921	90.2496804331717	88.9903788442563	86.6143111300341	81.2521683591266	62.4240141604227
91.8413133794894	91.8176284553007	91.6826117105575	91.4160502373823	90.9687454104319	90.2336527662498	88.9724172577442	86.5923683620084	81.2206966218055	62.3551549338598
91.8269427135255	91.8033219847585	91.6682638269423	91.4015001544031	90.9537175011097	90.2176483420009	88.954480882527	86.5704547674355	81.1892629819333	62.2863531942862
91.8125927195538	91.7890362345266	91.6539369257607	91.3869715042736	90.9387117015233	90.2016671124339	88.936569663593	86.548570281534	81.1578673565855	62.2176088126796
91.7982633737126	91.7747711785273	91.6396309767761	91.3724642513483	90.9237279700443	90.1857090296815	88.9186835461026	86.5267148397452	81.1265096631349	62.1489216604993
91.7839546520671	91.7605267906286	91.6253459497319	91.3579783600063	90.9087662651182	90.1697740459997	88.9008224753866	86.504888377732	81.0951898192503	62.080291609683
91.7696665306111	91.7463030446455	91.6110818143519	91.3435137946513	90.8938265452647	90.1538621137675	88.8829863969461	86.4830908313776	81.0639077428945	62.0117185326449
91.7553989852676	91.7320999143408	91.5968385403414	91.3290705197128	90.8789087690775	90.1379731854868	88.8651752564516	86.4613221367845	81.0326633523232	61.9432023022724
91.7411519918897	91.7179173734258	91.5826160973875	91.3146484996455	90.8640128952243	90.1221072137815	88.847388999742	86.4395822302737	81.0014565660832	61.8747427919242
91.7269255262615	91.7037553955615	91.56841445516	91.3002476989302	90.849138882447	90.1062641513974	88.8296275728244	86.417871048383	80.970287303011	61.8063398754273
91.7127195640995	91.6896139543588	91.5542335833117	91.285868082074	90.8342866895613	90.0904439512021	88.811890921873	86.3961885278666	80.939155482231	61.7379934270746
91.698534081053	91.67549302338	91.5400734514795	91.2715096136108	90.8194562754572	90.0746465661842	88.7941789932284	86.3745346056936	80.9080610231544	61.6697033216227
91.6843690527052	91.6613925761395	91.5259340292847	91.2571722581013	90.8046475990987	90.0588719494531	88.776491733397	86.3529092190471	80.8770038454776	61.601469434289
91.6702244545744	91.6473125861041	91.5118152863336	91.2428559801338	90.7898606195237	90.0431200542388	88.7588290890502	86.3313123053232	80.8459838691802	61.5332916407495
91.6561002621146	91.6332530266944	91.4977171922183	91.2285607443242	90.7750952958445	90.0273908338913	88.7411910070239	86.3097438021296	80.8150010145243	61.4651698171361
91.6419964507164	91.6192138712855	91.4836397165173	91.2142865153163	90.7603515872471	90.0116842418804	88.7235774343176	86.2882036472852	80.7840552020526	61.3971038400346
91.6279129957083	91.6051950932075	91.469582828796	91.2000332577826	90.7456294529917	89.9960002317952	88.7059883180937	86.2666917788185	80.7531463525868	61.329093586482
91.613849872357	91.5911966657468	91.4555464986074	91.1858009364239	90.7309288524126	89.9803387573439	88.6884236056768	86.2452081349667	80.7222743872267	61.2611389339638
91.5998070558689	91.5772185621464	91.4415306954924	91.1715895159702	90.7162497449181	89.9646997723533	88.6708832445533	86.223752654175	80.6914392273481	61.1932397604124
91.5857845213906	91.5632607556069	91.4275353889811	91.1573989611808	90.7015920899903	89.9490832307687	88.65336718237	86.2023252750952	80.6606407946019	61.1253959442041
91.5717822440099	91.5493232192874	91.4135605485924	91.1432292368447	90.6869558471856	89.933489086653	88.6358753669346	86.1809259365848	80.6298790109124	61.0576073641568
91.5578001987568	91.5354059263061	91.3996061438356	91.1290803077808	90.6723409761342	89.9179172941871	88.6184077462136	86.1595545777062	80.5991537984758	60.989873899528
91.5438383606041	91.521508849741	91.3856721442101	91.1149521388381	90.6577474365403	89.9023678076689	88.6009642683328	86.1382111377253	80.5684650797592	60.9221954300124
91.5298967044686	91.507631962631	91.3717585192066	91.1008446948963	90.6431751881822	89.8868405815132	88.583544881576	86.1168955561111	80.5378127774989	60.8545718357393
91.5159752052116	91.4937752379765	91.3578652383073	91.0867579408659	90.6286241909117	89.8713355702514	88.5661495343846	86.0956077725341	80.507196814699	60.7870029972705
91.5020738376402	91.4799386487397	91.3439922709866	91.0726918416885	90.614094404655	89.8558527285311	88.5487781753567	86.0743477268657	80.4766171146301	60.7194887955982
91.4881925765075	91.4661221678462	91.3301395867117	91.0586463623373	90.5995857894119	89.8403920111157	88.5314307532466	86.0531153591772	80.4460736008281	60.6520291121426
91.4743313965143	91.4523257681851	91.316307154943	91.0446214678169	90.585098305256	89.8249533728841	88.5141072169642	86.0319106097386	80.4155661970925	60.5846238287496
91.4604902723092	91.4385494226099	91.3024949451348	91.0306171231641	90.5706319123349	89.8095367688304	88.4968075155742	86.010733419018	80.3850948274854	60.5172728276886
91.4466691784897	91.4247931039393	91.2887029267358	91.016633293448	90.5561865708699	89.7941421540633	88.4795315982954	85.9895837276804	80.3546594163299	60.4499759916504
91.4328680896032	91.4110567849579	91.2749310691896	91.00266994377	90.5417622411559	89.7787694838062	88.4622794145004	85.9684614765868	80.324259888209	60.382733203745
91.4190869801474	91.3973404384168	91.261179341935	90.9887270392647	90.5273588835618	89.7634187133964	88.4450509137145	85.9473666067933	80.293896167964	60.3155443474993
91.4053258245717	91.3836440370347	91.2474477144073	90.9748045450994	90.5129764585301	89.7480897982851	88.4278460456153	85.9262990595502	80.2635681806934	60.248409306855
91.3915845972774	91.3699675534979	91.2337361560378	90.9609024264749	90.4986149265768	89.7327826940366	88.4106647600322	85.9052587763009	80.2332758517516	60.1813279661665
91.3778632726188	91.3563109604618	91.2200446362549	90.9470206486258	90.4842742482917	89.7174973563288	88.3935070069454	85.8842456986812	80.2030191067476	60.1143002101986
91.3641618249042	91.3426742305511	91.2063731244848	90.9331591768201	90.4699543843381	89.7022337409518	88.3763727364856	85.8632597685183	80.1727978715436	60.0473259241247
91.3504802283963	91.3290573363605	91.1927215901514	90.9193179763603	90.4556552954527	89.6869918038084	88.3592618989331	85.8423009278298	80.1426120722537	59.9804049935245
91.3368184573131	91.3154602504556	91.1790900026772	90.9054970125833	90.441376942446	89.6717715009133	88.3421744447175	85.8213691188229	80.112461635243	59.9135373043817
91.3231764858289	91.3018829453736	91.165478331484	90.8916962508602	90.4271192862017	89.656572788393	88.3251103244167	85.8004642838935	80.0823464871256	59.8467227430823
91.3095542880748	91.2883253936236	91.1518865459928	90.8779156565975	90.412882287677	89.6413956224851	88.3080694887567	85.7795863656253	80.0522665547644	59.7799611964124
91.2959518381396	91.2747875676877	91.1383146156246	90.8641551952363	90.3986659079024	89.6262399595386	88.2910518886105	85.7587353067888	80.0222217652689	59.713252551556
91.2823691100706	91.2612694400216	91.1247625098012	90.8504148322533	90.3844701079818	89.6111057560129	88.274057474998	85.7379110503405	79.9922120459942	59.6465966960931
91.2688060778741	91.2477709830548	91.1112301979451	90.8366945331608	90.3702948490923	89.595992968478	88.257086199085	85.7171135394221	79.9622373245404	59.5799935179979
91.2552627155167	91.234292169192	91.0977176494803	90.8229942635069	90.3561400924843	89.5809015536135	88.2401380121827	85.6963427173597	79.9322975287505	59.5134429056362
91.2417389969252	91.2208329708132	91.0842248338328	90.8093139888755	90.3420057994812	89.5658314682092	88.2232128657473	85.6755985276625	79.9023925867096	59.446944747764
91.2282348959884	91.2073933602743	91.0707517204309	90.795653674887	90.3278919314797	89.5507826691639	88.2063107113792	85.6548809140224	79.8725224267438	59.3804989335253
91.2147503865568	91.1939733099083	91.0572982787058	90.7820132871981	90.3137984499494	89.5357551134855	88.1894315008222	85.634189820313	79.8426869774189	59.31410535245
91.2012854424442	91.1805727920254	91.043864478092	90.7683927915025	90.2997253164331	89.5207487582906	88.1725751859635	85.6135251905886	79.812886167539	59.247763894452
91.1878400374277	91.1671917789136	91.0304502880278	90.7547921535304	90.2856724925464	89.5057635608042	88.1557417188325	85.5928869690836	79.7831199261458	59.1814744498275
91.1744141452488	91.15383024284	91.0170556779555	90.7412113390494	90.2716399399777	89.4907994783593	88.1389310516007	85.5722751002115	79.7533881825169	59.1152369092528
91.1610077396143	91.1404881560505	91.0036806173224	90.7276503138644	90.2576276204885	89.4758564683965	88.1221431365806	85.5516895285641	79.723690866165	59.0490511637824
91.1476207941965	91.1271654907711	90.9903250755805	90.7141090438177	90.2436354959129	89.4609344884638	88.1053779262257	85.5311301989107	79.6940279068364	58.9829171048473
91.1342532826342	91.1138622192082	90.9769890221877	90.7005874947895	90.2296635281578	89.4460334962165	88.0886353731294	85.5105970561972	79.6643992345104	58.9168346242528
91.1209051785336	91.1005783135492	90.9636724266076	90.6870856326979	90.2157116792028	89.4311534494162	88.0719154300249	85.4900900455454	79.6348047793975	58.8508036141768
91.1075764554686	91.0873137459634	90.9503752583103	90.6736034234992	90.2017799110998	89.4162943059313	88.0552180497841	85.469609112252	79.6052444719389	58.7848239671682
91.0942670869814	91.0740684886021	90.9370974867727	90.660140833188	90.1878681859736	89.4014560237359	88.0385431854177	85.4491542017881	79.5757182428047	58.7188955761444
91.080977046584	91.0608425135995	90.9238390814789	90.6466978277973	90.1739764660213	89.3866385609102	88.0218907900739	85.4287252597981	79.5462260228935	58.6530183343901
91.0677063077577	91.0476357930734	90.9106000119207	90.633274373399	90.1601047135124	89.3718418756396	88.0052608170383	85.4083222320989	79.5167677433307	58.5871921355549
91.0544548439548	91.0344482991254	90.8973802475979	90.6198704361039	90.1462528907889	89.3570659262147	87.9886532197333	85.3879450646792	79.4873433354677	58.521416873652
91.0412226285986	91.0212800038419	90.8841797580188	90.6064859820619	90.1324209602648	89.3423106710308	87.9720679517176	85.3675937036991	79.4579527308805	58.4556924430561
91.0280096350844	91.0081308792943	90.8709985127007	90.593120977462	90.1186088844265	89.3275760685879	87.9555049666852	85.3472680954884	79.4285958613693	58.3900187385016
91.0148158367802	90.9950008975398	90.8578364811699	90.5797753885331	90.1048166258325	89.3128620774898	87.9389642184654	85.3269681865467	79.3992726589564	58.324395655081
91.0016412070269	90.9818900306219	90.8446936329625	90.5664491815431	90.0910441471134	89.2981686564445	87.9224456610219	85.306693923542	79.369983055886	58.2588230882428
90.9884857191394	90.9687982505708	90.8315699376248	90.5531423228004	90.0772914109716	89.2834957642633	87.9059492484527	85.2864452533106	79.3407269846227	58.1933009337902
90.9753493464072	90.9557255294043	90.8184653647134	90.5398547786528	90.0635583801818	89.2688433598607	87.8894749349888	85.2662221228556	79.3115043778504	58.127829087879
90.9622320620948	90.9426718391279	90.8053798837957	90.5265865154887	90.0498450175902	89.2542114022543	87.8730226749945	85.2460244793465	79.2823151684717	58.0624074470158
90.9491338394425	90.9296371517358	90.7923134644504	90.5133374997365	90.036151286115	89.2395998505641	87.8565924229661	85.2258522701185	79.2531592896061	57.9970359080565
90.936054651667	90.9166214392111	90.7792660762678	90.5001076978653	90.0224771487459	89.2250086640125	87.840184133532	85.2057054426716	79.2240366745895	57.9317143682047
90.9229944719619	90.9036246735265	90.7662376888501	90.4868970763848	90.0088225685446	89.2104378019237	87.8237977614518	85.1855839446701	79.1949472569732	57.8664427250095
90.9099532734985	90.8906468266447	90.7532282718118	90.4737056018455	89.995187508644	89.1958872237238	87.807433261616	85.1654877239414	79.1658909705226	57.8012208763644
90.8969310294264	90.877687870519	90.7402377947803	90.4605332408387	89.9815719322486	89.1813568889399	87.7910905890451	85.1454167284756	79.136867749216	57.7360487205051
90.883927712874	90.864747777094	90.7272662273959	90.4473799599972	89.9679758026343	89.1668467572006	87.7747696988896	85.1253709064247	79.1078775272444	57.6709261560081
90.8709432969491	90.8518265183056	90.7143135393124	90.4342457259947	89.9543990831485	89.1523567882348	87.7584705464291	85.1053502061021	79.0789202390093	57.605853081789
90.8579777547394	90.8389240660822	90.7013797001972	90.4211305055466	89.9408417372096	89.137886941872	87.7421930870718	85.0853545759811	79.0499958191228	57.5408293971009
90.8450310593135	90.8260403923446	90.688464679732	90.4080342654097	89.9273037283073	89.1234371780419	87.7259372763541	85.0653839646953	79.021104202406	57.4758550015327
90.8321031837211	90.8131754690068	90.675568447613	90.3949569723826	89.9137850200025	89.1090074567741	87.7097030699403	85.0454383210369	78.992245323888	57.4109297950071
90.8191941009936	90.8003292679765	90.6626909735512	90.3818985933058	89.9002855759268	89.0945977381974	87.6934904236216	85.0255175939564	78.9634191188052	57.3460536777799
90.8063037841448	90.7875017611555	90.6498322272725	90.3688590950618	89.8868053597831	89.08020798254	87.677299293316	85.0056217325621	78.9346255226	57.2812265504375
90.7934322061716	90.7746929204403	90.6369921785188	90.3558384445751	89.8733443353448	89.0658381501292	87.6611296350676	84.985750686119	78.9058644709203	57.2164483138957
90.7805793400542	90.7619027177224	90.6241707970474	90.3428366088125	89.8599024664565	89.0514882013906	87.644981405046	84.9659044040482	78.8771358996179	57.1517188693979
90.767745158757	90.749131124889	90.611368052632	90.3298535547836	89.8464797170331	89.0371580968483	87.6288545595462	84.9460828359263	78.8484397447479	57.0870381185138
90.7549296352289	90.7363781138232	90.5985839150627	90.31688924954	89.8330760510603	89.0228477971245	87.6127490549878	84.9262859314849	78.8197759425678	57.0224059631378
90.7421327424042	90.7236436564048	90.5858183541464	90.3039436601764	89.8196914325942	89.0085572629389	87.5966648479144	84.9065136406093	78.7911444295364	56.957822305487
90.7293544532028	90.7109277245106	90.5730713397072	90.2910167538301	89.8063258257616	88.9942864551089	87.5806018949934	84.8867659133384	78.762545142313	56.8932870481002
90.7165947405308	90.6982302900147	90.5603428415867	90.2781084976815	89.7929791947592	88.9800353345488	87.5645601530153	84.8670426998638	78.7339780177561	56.8288000938362
90.7038535772812	90.6855513247894	90.5476328296441	90.2652188589537	89.7796515038544	88.96580386227	87.5485395788935	84.8473439505292	78.705442992923	56.764361345872
90.6911309363345	90.6728908007052	90.5349412737569	90.2523478049135	89.7663427173846	88.9515919993802	87.5325401296633	84.8276696158295	78.6769400050683	56.6999707077015
90.6784267905587	90.6602486896315	90.5222681438207	90.2394953028706	89.7530527997573	88.9373997070836	87.516561762482	84.8080196464104	78.6484689916436	56.6356280831342
90.6657411128107	90.6476249634368	90.5096134097502	90.2266613201783	89.73978171545	88.9232269466802	87.5006044346281	84.7883939930676	78.6200298902961	56.5713333762931
90.6530738759359	90.6350195939896	90.4969770414786	90.2138458242335	89.7265294290101	88.9090736795657	87.4846681035007	84.7687926067462	78.5916226388677	56.5070864916139
90.6404250527694	90.6224325531584	90.4843590089589	90.2010487824765	89.7132959050549	88.8949398672314	87.4687527266194	84.7492154385399	78.5632471753945	56.4428873338431
90.6277946161362	90.6098638128123	90.4717592821633	90.1882701623916	89.7000811082713	88.8808254712635	87.4528582616236	84.7296624396906	78.5349034381054	56.3787358080364
90.6151825388518	90.5973133448216	90.4591778310842	90.1755099315069	89.686885003416	88.8667304533432	87.436984666272	84.7101335615875	78.5065913654215	56.3146318195577
90.6025887937226	90.5847811210578	90.4466146257338	90.1627680573945	89.6737075553153	88.8526547752459	87.4211318984423	84.6906287557665	78.4783108959554	56.2505752740774
90.5900133535465	90.5722671133945	90.434069636145	90.1500445076706	89.6605487288648	88.8385983988417	87.4052999161305	84.6711479739099	78.4500619685097	56.1865660775706
90.5774561911134	90.5597712937075	90.4215428323715	90.1373392499955	89.6474084890295	88.8245612860945	87.3894886774507	84.6516911678452	78.4218445220766	56.1226041363165
90.5649172792058	90.5472936338753	90.4090341844879	90.124652252074	89.6342868008439	88.8105433990618	87.3736981406344	84.6322582895448	78.3936584958371	56.0586893568961
90.5523965905989	90.5348341057796	90.39654366259	90.1119834816551	89.6211836294114	88.7965446998946	87.3579282640304	84.6128492911252	78.3655038291597	55.9948216461913
90.5398940980615	90.5223926813055	90.3840712367953	90.0993329065324	89.6080989399047	88.7825651508369	87.3421790061037	84.5934641248469	78.3373804615998	55.9310009113833
90.5274097743563	90.5099693323423	90.3716168772433	90.086700494544	89.5950326975654	88.7686047142259	87.3264503254358	84.5741027431128	78.3092883328991	55.8672270599512
90.5149435922403	90.4975640307834	90.3591805540953	90.0740862135729	89.5819848677042	88.754663352491	87.3107421807238	84.5547650984686	78.2812273829841	55.8034999996708
90.5024955244655	90.485176748527	90.3467622375351	90.0614900315467	89.5689554157004	88.7407410281541	87.2950545307801	84.5354511436014	78.2531975519658	55.7398196386129
90.4900655437792	90.4728074574764	90.3343618977691	90.048911916438	89.5559443070022	88.7268377038291	87.2793873345318	84.5161608313395	78.2251987801388	55.6761858851422
90.4776536229243	90.4604561295407	90.3219795050268	90.0363518362642	89.5429515071263	88.7129533422215	87.2637405510205	84.4968941146518	78.19723100798	55.6125986479156
90.4652597346403	90.4481227366345	90.3096150295606	90.0238097590879	89.5299769816581	88.6990879061285	87.2481141394016	84.477650946647	78.1692941761485	55.5490578358814
90.4528838516632	90.4358072506789	90.2972684416465	90.011285653017	89.5170206962513	88.6852413584383	87.232508058944	84.4584312805731	78.1413882254842	55.4855633582772
90.440525946726	90.4235096436019	90.2849397115839	89.9987794862042	89.5040826166279	88.6714136621302	87.2169222690298	84.4392350698168	78.113513097007	55.4221151246292
90.4281859925598	90.411229887338	90.2726288096964	89.9862912268478	89.4911627085784	88.6576047802741	87.2013567291536	84.4200622679028	78.0856687319165	55.3587130447507
90.4158639618932	90.3989679538296	90.2603357063316	89.9738208431917	89.4782609379613	88.6438146760301	87.1858113989222	84.4009128284935	78.0578550715906	55.2953570287404
90.4035598274536	90.3867238150266	90.2480603718616	89.9613683035248	89.4653772707031	88.6300433126487	87.1702862380543	84.3817867053879	78.0300720575848	55.2320469869816
90.3912735619672	90.3744974428874	90.2358027766829	89.9489335761819	89.4525116727984	88.6162906534701	87.1547812063797	84.3626838525217	78.0023196316319	55.1687828301406
90.3790051381598	90.3622888093785	90.2235628912172	89.9365166295433	89.4396641103096	88.6025566619241	87.1392962638392	84.3436042239659	77.9745977356405	55.1055644691655
90.3667545287566	90.3500978864755	90.211340685911	89.9241174320352	89.4268345493669	88.5888413015298	87.1238313704842	84.3245477739272	77.9469063116946	55.0423918152847
90.3545217064833	90.3379246461632	90.1991361312364	89.9117359521293	89.4140229561681	88.5751445358954	87.108386486476	84.3055144567463	77.9192453020528	54.9792647800061
90.3423066440661	90.325769060436	90.1869491976909	89.8993721583433	89.4012292969786	88.5614663287178	87.0929615720857	84.2865042268984	77.8916146491474	54.916183275115
90.3301093142324	90.3136311012982	90.1747798557979	89.8870260192408	89.3884535381314	88.5478066437825	87.0775565876935	84.2675170389918	77.8640142955838	54.8531472126739
90.3179296897108	90.3015107407644	90.1626280761068	89.8746975034315	89.3756956460267	88.5341654449631	87.0621714937884	84.248552847768	77.8364441841393	54.7901565050201
90.3057677432318	90.2894079508597	90.1504938291931	89.8623865795711	89.362955587132	88.5205426962215	87.046806250968	84.2296116081004	77.8089042577631	54.7272110647656
90.2936234475286	90.2773227036204	90.138377085659	89.8500932163614	89.3502333279821	88.506938361607	87.0314608199376	84.2106932749944	77.7813944595746	54.6643108047946
90.2814967753364	90.2652549710939	90.1262778161333	89.8378173825503	89.3375288351787	88.4933524052566	87.0161351615104	84.1917978035868	77.7539147328634	54.6014556382635
90.2693876993941	90.2532047253391	90.1141959912716	89.8255590469323	89.3248420753907	88.4797847913945	87.0008292366066	84.1729251491445	77.7264650210882	54.5386454785988
90.2572961924436	90.2411719384273	90.1021315817568	89.8133181783478	89.3121730153536	88.4662354843316	86.9855430062531	84.154075267065	77.6990452678759	54.4758802394961
90.245222227231	90.2291565824415	90.0900845582988	89.801094745684	89.29952162187	88.4527044484658	86.9702764315833	84.1352481128751	77.6716554170213	54.413159834919
90.2331657765063	90.2171586294778	90.0780548916354	89.7888887178741	89.2868878618088	88.4391916482813	86.9550294738366	84.1164436422307	77.6442954124861	54.350484179098
90.2211268130244	90.2051780516449	90.0660425525319	89.7767000638983	89.2742717021058	88.4256970483486	86.9398020943578	84.097661810916	77.6169651983978	54.2878531865289
90.2091053095452	90.1932148210648	90.0540475117816	89.7645287527829	89.2616731097631	88.4122206133239	86.9245942545972	84.0789025748433	77.5896647190499	54.2252667719718
90.1971012388337	90.1812689098732	90.0420697402058	89.752374753601	89.2490920518491	88.3987623079493	86.9094059161094	84.0601658900521	77.5623939189002	54.1627248504502
90.1851145736611	90.1693402902194	90.0301092086544	89.7402380354725	89.2365284954988	88.3853220970523	86.8942370405539	84.041451712709	77.5351527425705	54.1002273372492
90.1731452868043	90.1574289342671	90.0181658880057	89.7281185675639	89.2239824079129	88.3718999455455	86.8790875896938	84.0227599991067	77.507941134846	54.037774147915
90.161193351047	90.1455348141942	90.0062397491665	89.7160163190885	89.2114537563585	88.3584958184263	86.8639575253961	84.0040907056638	77.4807590406744	53.9753651982532
90.1492587391795	90.1336579021938	89.9943307630729	89.7039312593062	89.1989425081685	88.3451096807771	86.8488468096309	83.9854437889241	77.4536064051653	53.913000404328
90.1373414239996	90.1217981704735	89.9824389006899	89.6918633575241	89.1864486307419	88.3317414977644	86.8337554044711	83.9668192055562	77.4264831735891	53.8506796824608
90.1254413783124	90.1099555912568	89.9705641330116	89.6798125830961	89.173972091543	88.3183912346391	86.8186832720921	83.948216912353	77.399389291377	53.788402949229
90.1135585749312	90.0981301367825	89.9587064310619	89.6677789054229	89.1615128581022	88.3050588567359	86.8036303747714	83.929636866231	77.3723247041197	53.7261701214654
90.1016929866772	90.0863217793053	89.9468657658943	89.6557622939525	89.1490708980151	88.2917443294732	86.7885966748883	83.91107902423	77.3452893575669	53.6639811162563
90.0898445863806	90.0745304910965	89.9350421085918	89.6437627181797	89.1366461789431	88.278447618353	86.7735821349231	83.8925433435124	77.3182831976267	53.6018358509409
90.0780133468804	90.0627562444436	89.9232354302678	89.6317801476465	89.1242386686126	88.2651686889601	86.7585867174575	83.8740297813629	77.2913061703648	53.53973424311
90.0661992410247	90.0509990116509	89.9114457020657	89.6198145519421	89.1118483348154	88.2519075069626	86.7436103851734	83.8555382951879	77.2643582220038	53.477676210605
90.0544022416717	90.0392587650399	89.8996728951593	89.6078659007027	89.0994751454085	88.2386640381112	86.7286531008532	83.8370688425148	77.2374392989228	53.4156616715166
90.0426223216892	90.0275354769493	89.8879169807528	89.5959341636118	89.0871190683137	88.2254382482391	86.7137148273787	83.8186213809918	77.2105493476561	53.3536905441837
90.0308594539555	90.0158291197356	89.8761779300813	89.5840193104003	89.0747800715179	88.2122301032616	86.6987955277317	83.8001958683875	77.1836883148931	53.2917627471928
90.0191136113593	90.0041396657729	89.8644557144107	89.572121310846	89.0624581230729	88.1990395691761	86.6838951649928	83.7817922625899	77.1568561474777	53.2298781993761
90.0073847668004	89.9924670874538	89.8527503050377	89.5602401347744	89.0501531910949	88.1858666120616	86.6690137023414	83.7634105216063	77.1300527924069	53.1680368198111
89.99567289319	89.980811357189	89.8410616732906	89.5483757520581	89.0378652437649	88.1727111980787	86.6541511030552	83.7450506035628	77.1032781968311	53.1062385278191
89.9839779634507	89.9691724474081	89.8293897905286	89.5365281326173	89.0255942493285	88.1595732934693	86.63930733051	83.7267124667037	77.0765323080525	53.0444832429645
89.9722999505171	89.9575503305594	89.8177346281429	89.5246972464195	89.0133401760955	88.1464528645563	86.6244823481793	83.7083960693911	77.0498150735253	52.9827708850534
89.9606388273359	89.9459449791106	89.8060961575558	89.5128830634796	89.0011029924401	88.1333498777433	86.6096761196339	83.6901013701042	77.0231264408545	52.9211013741327
89.9489945668664	89.9343563655487	89.7944743502219	89.5010855538601	88.9888826668006	88.1202642995145	86.5948886085413	83.6718283274393	76.9964663577953	52.859474630489
89.9373671420809	89.9227844623805	89.7828691776276	89.4893046876708	88.9766791676796	88.1071960964344	86.5801197786659	83.6535769001088	76.9698347722528	52.7978905746478
89.9257565259645	89.9112292421326	89.7712806112913	89.4775404350692	88.9644924636433	88.0941452351478	86.5653695938683	83.635347046941	76.943231632281	52.7363491273721
89.9141626915159	89.899690677352	89.7597086227638	89.4657927662604	88.9523225233222	88.0811116823789	86.5506380181047	83.6171387268798	76.9166568860823	52.6748502096614
89.9025856117477	89.8881687406058	89.7481531836283	89.4540616514969	88.9401693154101	88.0680954049321	86.5359250154273	83.5989518989836	76.8901104820068	52.6133937427511
89.8910252596862	89.876663404482	89.7366142655005	89.4423470610789	88.9280328086648	88.0550963696906	86.5212305499831	83.5807865224257	76.863592368552	52.5519796481109
89.8794816083723	89.8651746415895	89.7250918400289	89.4306489653543	88.9159129719076	88.0421145436172	86.5065545860141	83.5626425564931	76.8371024943616	52.4906078474443
89.8679546308613	89.8537024245582	89.7135858788949	89.4189673347185	88.9038097740231	88.0291498937534	86.4918970878569	83.5445199605866	76.8106408082253	52.4292782626873
89.8564443002234	89.8422467260395	89.7020963538125	89.4073021396146	88.8917231839594	88.0162023872194	86.4772580199421	83.5264186942198	76.7842072590783	52.3679908160073
89.844950589544	89.8308075187063	89.6906232365294	89.3956533505336	88.8796531707276	88.0032719912141	86.4626373467942	83.5083387170191	76.757801796	52.3067454298025
89.8334734719241	89.8193847752533	89.6791664988261	89.3840209380138	88.8675997034021	87.9903586730144	86.4480350330313	83.490279988723	76.7314243682142	52.2455420267007
89.8220129204803	89.8079784683974	89.6677261125166	89.3724048726416	88.8555627511204	87.9774623999752	86.4334510433644	83.4722424691819	76.7050749250882	52.184380529558
89.8105689083451	89.7965885708777	89.6563020494486	89.360805125051	88.8435422830826	87.9645831395295	86.4188853425976	83.4542261183574	76.6787534161318	52.1232608614584
89.7991414086673	89.7852150554556	89.6448942815031	89.3492216659236	88.8315382685519	87.9517208591875	86.4043378956273	83.4362308963218	76.6524597909974	52.0621829457126
89.7877303946125	89.7738578949156	89.6335027805953	89.3376544659891	88.819550676854	87.9388755265369	86.389808667442	83.4182567632579	76.6261939994788	52.0011467058566
89.7763358393627	89.7625170620647	89.622127518674	89.3261034960247	88.8075794773774	87.9260471092427	86.3752976231223	83.4003036794586	76.5999559915109	51.9401520656517
89.7649577161173	89.7511925297332	89.6107684677222	89.3145687268556	88.7956246395728	87.9132355750464	86.3608047278401	83.3823716053261	76.5737457171692	51.8791989490824
89.7535959980927	89.739884270775	89.5994255997568	89.3030501293545	88.7836861329534	87.9004408917666	86.3463299468583	83.3644605013719	76.5475631266689	51.8182872803564
89.7422506585233	89.7285922580671	89.5880988868292	89.2915476744423	88.7717639270947	87.887663027298	86.3318732455311	83.3465703282159	76.5214081703645	51.7574169839032
89.730921670661	89.7173164645106	89.5767883010253	89.2800613330874	88.7598579916343	87.8749019496118	86.3174345893027	83.3287010465865	76.4952807987494	51.6965879843732
89.7196090077759	89.7060568630305	89.5654938144651	89.2685910763064	88.747968296272	87.8621576267551	86.3030139437078	83.3108526173197	76.469180962455	51.6358002066368
89.7083126431564	89.6948134265757	89.5542153993036	89.2571368751633	88.7360948107692	87.8494300268507	86.2886112743711	83.2930250013591	76.4431086122501	51.5750535757834
89.6970325501095	89.6835861281199	89.5429530277304	89.2456987007703	88.7242375049496	87.8367191180973	86.2742265470065	83.2752181597549	76.4170636990409	51.5143480171209
89.6857687019612	89.672374940661	89.53170667197	89.2342765242872	88.7123963486981	87.8240248687686	86.2598597274173	83.2574320536643	76.3910461738696	51.4536834561741
89.6745210720562	89.6611798372217	89.5204763042818	89.2228703169219	88.7005713119616	87.8113472472136	86.2455107814959	83.2396666443501	76.3650559879145	51.3930598186842
89.6632896337589	89.6500007908499	89.5092618969602	89.2114800499301	88.6887623647485	87.7986862218563	86.231179675223	83.2219218931813	76.3390930924893	51.3324770306079
89.652074360453	89.6388377746184	89.4980634223349	89.2001056946153	88.6769694771283	87.7860417611954	86.2168663746678	83.2041977616318	76.313157439042	51.2719350181166
89.6408752255421	89.6276907616253	89.486880852771	89.1887472223288	88.6651926192321	87.773413833804	86.2025708459874	83.1864942112805	76.2872489791553	51.2114337075949
89.6296922024498	89.6165597249944	89.4757141606686	89.1774046044699	88.6534317612521	87.7608024083295	86.1882930554267	83.1688112038109	76.2613676645452	51.1509730256406
89.6185252646198	89.6054446378751	89.4645633184638	89.1660778124858	88.6416868734415	87.7482074534936	86.1740329693177	83.1511487010104	76.235513447061	51.0905528990631
89.6073743855164	89.5943454734425	89.4534282986279	89.1547668178715	88.6299579261145	87.7356289380915	86.1597905540798	83.13350666477	76.2096862786843	51.0301732548828
89.5962395386247	89.583262204898	89.4423090736681	89.1434715921699	88.6182448896462	87.7230668309925	86.1455657762188	83.1158850570842	76.183886111529	50.9698340203303
89.5851206974504	89.5721948054692	89.4312056161272	89.1321921069718	88.6065477344724	87.7105211011388	86.1313586023274	83.09828384005	76.1581128978402	50.9095351228454
89.5740178355208	89.56114324841	89.4201178985841	89.1209283339157	88.5948664310896	87.6979917175464	86.1171689990839	83.0807029758672	76.1323665899941	50.8492764900763
89.5629309263841	89.5501075070008	89.4090458936535	89.1096802446883	88.5832009500548	87.685478649304	86.1029969332528	83.0631424268373	76.1066471404972	50.7890580498787
89.5518599436102	89.539087554549	89.3979895739865	89.0984478110237	88.5715512619854	87.6729818655731	86.0888423716842	83.0456021553639	76.0809545019859	50.7288797303149
89.540804860791	89.5280833643888	89.3869489122699	89.0872310047043	88.5599173375593	87.6605013355881	86.0747052813132	83.0280821239514	76.0552886272258	50.668741459653
89.5297656515401	89.5170949098814	89.3759238812271	89.0760297975602	88.5482991475143	87.6480370286554	86.0605856291599	83.0105822952054	76.0296494691116	50.6086431663663
89.5187422894935	89.5061221644154	89.3649144536178	89.0648441614692	88.5366966626485	87.635588914154	86.0464833823293	82.9931026318318	76.004036980666	50.548584779132
89.5077347483095	89.4951651014066	89.353920602238	89.0536740683571	88.5251098538201	87.6231569615346	86.0323985080104	82.9756430966368	75.9784511150397	50.4885662268307
89.4967430016691	89.4842236942986	89.3429422999204	89.0425194901974	88.5135386919469	87.6107411403199	86.0183309734765	82.958203652526	75.9528918255105	50.4285874385453
89.4857670232759	89.4732979165626	89.3319795195341	89.0313803990117	88.5019831480067	87.598341420104	86.0042807460847	82.9407842625046	75.9273590654829	50.3686483435606
89.4748067868567	89.4623877416978	89.3210322339852	89.020256766869	88.490443193037	87.5859577705526	85.9902477932754	82.9233848896767	75.9018527884878	50.308748871362
89.4638622661616	89.4514931432313	89.3101004162162	89.0091485658864	88.4789187981345	87.5735901614024	85.9762320825724	82.906005497245	75.8763729481817	50.248888951635
89.4529334349638	89.4406140947185	89.2991840392068	88.9980557682288	88.4674099344559	87.5612385624611	85.9622335815823	82.8886460485103	75.8509194983464	50.1890685142644
89.4420202670604	89.429750569743	89.2882830759735	88.9869783461086	88.4559165732168	87.5489029436074	85.9482522579943	82.8713065068712	75.8254923928884	50.1292874893331
89.4311227362719	89.4189025419173	89.2773974995697	88.9759162717863	88.4444386856923	87.5365832747903	85.9342880795799	82.8539868358238	75.8000915858383	50.0695458071219
89.4202408164432	89.408069984882	89.266527283086	88.96486951757	88.4329762432164	87.5242795260293	85.9203410141929	82.8366869989615	75.7747170313506	50.0098433981082
89.4093744814432	89.3972528723069	89.2556723996502	88.9538380558155	88.4215292171824	87.5119916674142	85.9064110297686	82.8194069599741	75.7493686837029	49.9501801929654
89.3985237051649	89.3864511778905	89.2448328224272	88.9428218589264	88.4100975790422	87.4997196691046	85.8924980943239	82.8021466826479	75.7240464972956	49.8905561225622
89.3876884615262	89.3756648753605	89.2340085246194	88.9318208993539	88.3986813003068	87.48746350133	85.8786021759569	82.7849061308651	75.6987504266513	49.8309711179617
89.3768687244695	89.3648939384739	89.2231994794665	88.9208351495971	88.3872803525458	87.4752231343895	85.8647232428467	82.7676852686036	75.6734804264145	49.7714251104206
89.366064467962	89.3541383410168	89.2124056602456	88.9098645822026	88.3758947073872	87.4629985386514	85.8508612632531	82.7504840599365	75.6482364513508	49.7119180313885
89.3552756659962	89.3433980568051	89.2016270402713	88.8989091697648	88.3645243365178	87.4507896845536	85.837016205516	82.7333024690318	75.6230184563467	49.652449812507
89.3445022925896	89.332673059684	89.190863592896	88.8879688849255	88.3531692116825	87.4385965426026	85.8231880380556	82.7161404601521	75.597826396409	49.5930203856093
89.3337443217852	89.3219633235287	89.1801152915095	88.8770437003745	88.3418293046846	87.426419083374	85.8093767293721	82.6989979976542	75.5726602266643	49.533629682719
89.3230017276516	89.3112688222443	89.1693821095394	88.8661335888489	88.3305045873855	87.4142572775119	85.7955822480451	82.6818750459886	75.5475199023588	49.4742776360494
89.3122744842831	89.3005895297658	89.1586640204512	88.8552385231335	88.3191950317048	87.4021110957288	85.7818045627333	82.6647715696994	75.5224053788572	49.4149641780031
89.3015625657998	89.2899254200584	89.1479609977482	88.8443584760606	88.3079006096197	87.3899805088055	85.7680436421748	82.6476875334239	75.497316611643	49.3556892411709
89.290865946348	89.2792764671176	89.1372730149714	88.8334934205102	88.2966212931657	87.3778654875909	85.7542994551861	82.6306229018919	75.4722535563176	49.2964527583312
89.2801846001003	89.2686426449692	89.1266000457001	88.8226433294096	88.2853570544356	87.3657660030016	85.7405719706626	82.6135776399258	75.4472161685997	49.2372546624492
89.2695185012554	89.2580239276698	89.1159420635515	88.8118081757339	88.27410786558	87.353682026022	85.7268611575775	82.5965517124403	75.4222044043253	49.1780948866762
89.2588676240389	89.2474202893063	89.1052990421806	88.8009879325055	88.2628736988071	87.3416135277039	85.7131669849823	82.5795450844416	75.3972182194469	49.118973364349
89.2482319427027	89.2368317039967	89.0946709552811	88.7901825727941	88.2516545263824	87.3295604791664	85.6994894220059	82.5625577210273	75.3722575700331	49.0598900289888
89.237611431526	89.2262581458895	89.0840577765843	88.7793920697172	88.2404503206286	87.3175228515959	85.6858284378549	82.5455895873861	75.3473224122683	49.0008448143009
89.2270060648147	89.2156995891645	89.0734594798603	88.7686163964393	88.2292610539257	87.3055006162454	85.6721840018129	82.5286406487976	75.3224127024521	48.9418376541738
89.216415816902	89.2051560080326	89.0628760389171	88.7578555261728	88.2180866987109	87.2934937444348	85.6585560832405	82.5117108706316	75.2975283969987	48.8828684826784
89.2058406621482	89.1946273767359	89.0523074276012	88.7471094321769	88.206927227478	87.2815022075506	85.6449446515749	82.494800218348	75.2726694524368	48.8239372340674
89.1952805749413	89.1841136695476	89.0417536197976	88.7363780877585	88.1957826127781	87.2695259770454	85.6313496763298	82.4779086574965	75.2478358254092	48.7650438427746
89.1847355296967	89.1736148607728	89.0312145894295	88.7256614662717	88.1846528272188	87.2575650244383	85.6177711270949	82.4610361537162	75.2230274726718	48.7061882434141
89.1742055008578	89.1631309247477	89.0206903104589	88.7149595411178	88.1735378434643	87.2456193213143	85.6042089735359	82.4441826727351	75.1982443510936	48.6473703707797
89.1636904628956	89.1526618358406	89.0101807568863	88.7042722857456	88.1624376342356	87.2336888393239	85.5906631853942	82.4273481803701	75.1734864176565	48.5885901598442
89.1531903903092	89.1422075684512	88.9996859027505	88.6935996736508	88.1513521723099	87.2217735501837	85.5771337324864	82.4105326425265	75.1487536294542	48.5298475457586
89.142705257626	89.1317680970113	88.9892057221293	88.6829416783764	88.1402814305208	87.2098734256754	85.5636205847042	82.3937360251978	75.1240459436922	48.4711424638517
89.1322350394015	89.1213433959847	88.978740189139	88.6722982735128	88.1292253817582	87.1979884376462	85.5501237120146	82.3769582944649	75.0993633176873	48.4124748496289
89.1217797102198	89.1109334398671	88.9682892779348	88.6616694326973	88.1181839989679	87.1861185580081	85.5366430844586	82.3601994164966	75.0747057088674	48.3538446387721
89.1113392446933	89.1005382031865	88.9578529627104	88.6510551296142	88.107157255152	87.1742637587383	85.5231786721522	82.3434593575486	75.0500730747704	48.2952517671385
89.1009136174635	89.0901576605032	88.9474312176986	88.6404553379952	88.0961451233682	87.1624240118785	85.5097304452851	82.3267380839633	75.0254653730447	48.2366961707604
89.0905028032003	89.0797917864098	88.9370240171708	88.6298700316188	88.0851475767303	87.1505992895351	85.4962983741212	82.3100355621699	75.0008825614479	48.1781777858443
89.0801067766029	89.0694405555315	88.9266313354375	88.6192991843106	88.0741645884075	87.1387895638787	85.4828824289977	82.2933517586835	74.976324597847	48.1196965487701
89.0697255123992	89.0591039425259	88.916253146848	88.6087427699431	88.0631961316247	87.1269948071442	85.4694825803256	82.2766866401053	74.9517914402177	48.0612523960908
89.0593589853467	89.0487819220833	88.9058894257907	88.5982007624359	88.0522421796623	87.1152149916305	85.4560987985888	82.2600401731219	74.9272830466441	48.0028452645314
89.0490071702319	89.0384744689269	88.8955401466928	88.5876731357554	88.0413027058561	87.1034500897003	85.4427310543441	82.2434123245051	74.9027993753182	47.9444750909886
89.0386700418709	89.0281815578125	88.8852052840208	88.5771598639148	88.0303776835971	87.09170007378	85.4293793182213	82.2268030611119	74.8783403845395	47.8861418125302
89.0283475751093	89.017903163529	88.87488481228	88.5666609209744	88.0194670863313	87.0799649163595	85.4160435609222	82.2102123498837	74.8539060327148	47.8278453663939
89.0180397448224	89.0076392608984	88.8645787060151	88.556176281041	88.0085708875601	87.0682445899919	85.4027237532211	82.1936401578463	74.8294962783574	47.7695856899874
89.0077465259153	88.9973898247754	88.8542869398096	88.5457059182684	87.9976890608395	87.0565390672935	85.3894198659642	82.1770864521095	74.805111080087	47.7113627208873
88.9974678933231	88.9871548300484	88.8440094882864	88.5352498068571	87.9868215797806	87.0448483209436	85.3761318700695	82.1605511998669	74.7807503966294	47.6531763968386
88.9872038220107	88.9769342516387	88.8337463261077	88.5248079210542	87.9759684180489	87.0331723236842	85.3628597365264	82.1440343683954	74.7564141868156	47.5950266557538
88.9769542869733	88.966728064501	88.8234974279745	88.5143802351536	87.965129549365	87.0215110483201	85.3496034363954	82.1275359250552	74.732102409582	47.5369134357128
88.9667192632363	88.9565362436236	88.8132627686276	88.5039667234957	87.9543049475035	87.0098644677183	85.3363629408085	82.1110558372891	74.7078150239695	47.478836674962
88.9564987258554	88.9463587640281	88.8030423228466	88.4935673604676	87.9434945862938	86.9982325548082	85.323138220968	82.0945940726227	74.6835519891237	47.4207963119134
88.9462926499168	88.9361956007698	88.7928360654508	88.4831821205028	87.9326984396195	86.9866152825814	85.309929248147	82.0781505986636	74.6593132642936	47.3627922851446
88.9361010105374	88.9260467289377	88.7826439712985	88.4728109780817	87.9219164814182	86.9750126240911	85.2967359936891	82.0617253831015	74.6350988088324	47.3048245333975
88.9259237828645	88.9159121236545	88.7724660152876	88.4624539077306	87.9111486856818	86.9634245524527	85.2835584290077	82.0453183937077	74.6109085821959	47.2468929955783
88.9157609420763	88.9057917600765	88.7623021723554	88.4521108840227	87.9003950264561	86.9518510408428	85.2703965255862	82.0289295983347	74.5867425439431	47.1889976107565
88.9056124633819	88.8956856133943	88.7521524174783	88.4417818815774	87.889655477841	86.9402920624998	85.2572502549777	82.0125589649164	74.5626006537353	47.1311383181644
88.8954783220214	88.8855936588321	88.7420167256725	88.4314668750605	87.8789300139899	86.9287475907231	85.2441195888048	81.9962064614672	74.5384828713357	47.0733150571966
88.8853584932658	88.8755158716482	88.7318950719935	88.4211658391842	87.8682186091099	86.9172175988732	85.2310044987591	81.9798720560821	74.5143891566092	47.0155277674093
88.8752529524174	88.8654522271352	88.7217874315362	88.4108787487068	87.8575212374618	86.9057020603717	85.2179049566013	81.9635557169364	74.4903194695222	46.9577763885196
88.8651616748097	88.8554027006195	88.7116937794351	88.4006055784329	87.8468378733599	86.8942009487007	85.2048209341609	81.9472574122852	74.4662737701417	46.9000608604053
88.8550846358077	88.8453672674621	88.7016140908641	88.3903463032135	87.8361684911716	86.8827142374032	85.1917524033359	81.9309771104633	74.4422520186355	46.8423811231037
88.8450218108076	88.835345903058	88.6915483410367	88.3801008979454	87.8255130653178	86.8712419000825	85.1786993360925	81.914714779885	74.4182541752713	46.7847371168118
88.8349731752373	88.8253385828367	88.681496505206	88.3698693375718	87.8148715702724	86.859783910402	85.1656617044653	81.8984703890434	74.3942802004168	46.7271287818849
88.8249387045562	88.815345282262	88.6714585586645	88.3596515970819	87.8042439805626	86.8483402420854	85.1526394805564	81.8822439065106	74.370330054539	46.6695560588366
88.8149183742556	88.8053659768324	88.6614344767445	88.3494476515107	87.7936302707681	86.8369108689163	85.1396326365359	81.8660353009373	74.346403698204	46.6120188883381
88.8049121598585	88.7954006420808	88.6514242348176	88.3392574759396	87.7830304155218	86.8254957647381	85.1266411446412	81.8498445410524	74.3225010920767	46.5545172112174
88.7949200369197	88.7854492535747	88.6414278082952	88.3290810454956	87.7724443895092	86.8140949034538	85.1136649771768	81.8336715956626	74.2986221969203	46.497050968459
88.7849419810261	88.7755117869162	88.6314451726283	88.3189183353517	87.7618721674684	86.8027082590258	85.1007041065144	81.8175164336527	74.2747669735958	46.4396201012032
88.7749779677966	88.7655882177423	88.6214763033075	88.3087693207267	87.7513137241902	86.7913358054758	85.0877585050925	81.8013790239845	74.2509353830621	46.3822245507457
88.7650279728822	88.7556785217245	88.6115211758631	88.2986339768854	87.7407690345175	86.7799775168847	85.074828145416	81.7852593356974	74.2271273863751	46.3248642585367
88.7550919719661	88.7457826745694	88.6015797658649	88.2885122791381	87.7302380733458	86.7686333673923	85.0619130000564	81.7691573379074	74.2033429446879	46.2675391661807
88.745169940764	88.7359006520184	88.5916520489224	88.278404202841	87.7197208156227	86.7573033311974	85.0490130416513	81.7530729998073	74.1795820192499	46.2102492154359
88.7352618550237	88.7260324298476	88.581738000685	88.2683097233959	87.7092172363479	86.7459873825571	85.0361282429042	81.7370062906663	74.1558445714069	46.1529943482134
88.7253676905256	88.7161779838685	88.5718375968414	88.2582288162503	87.6987273105731	86.7346854957874	85.0232585765843	81.7209571798295	74.1321305626006	46.0957745065769
88.7154874230826	88.7063372899273	88.5619508131203	88.248161456897	87.688251013402	86.7233976452623	85.0104040155264	81.704925636718	74.1084399543679	46.0385896327419
88.7056210285401	88.6965103239055	88.55207762529	88.2381076208747	87.6777883199899	86.7121238054142	84.9975645326308	81.6889116308286	74.0847727083413	45.9814396690757
88.6957684827763	88.6866970617195	88.5422180091583	88.2280672837674	87.6673392055439	86.7008639507334	84.9847401008626	81.6729151317332	74.0611287862478	45.9243245580962
88.6859297617021	88.6768974793211	88.532371940573	88.2180404212045	87.6569036453229	86.6896180557682	84.9719306932521	81.6569361090789	74.0375081499092	45.8672442424718
88.6761048412612	88.6671115526973	88.5225393954215	88.2080270088609	87.6464816146369	86.6783860951246	84.959136282894	81.6409745325875	74.0139107612411	45.8101986650206
88.6662936974302	88.6573392578702	88.5127203496308	88.1980270224568	87.6360730888475	86.6671680434659	84.9463568429478	81.6250303720556	73.9903365822533	45.7531877687101
88.6564963062186	88.6475805708974	88.5029147791678	88.1880404377575	87.6256780433676	86.6559638755132	84.9335923466373	81.6091035973537	73.9667855750487	45.6962114966567
88.646712643669	88.6378354678719	88.493122660039	88.178067230574	87.6152964536613	86.6447735660445	84.9208427672502	81.5931941784268	73.9432577018238	45.6392697921249
88.636942685857	88.6281039249218	88.4833439682906	88.1681073767619	87.6049282952436	86.6335970898953	84.9081080781381	81.5773020852932	73.9197529248674	45.5823625985269
88.6271864088913	88.618385918211	88.4735786800085	88.1581608522226	87.5945735436806	86.6224344219575	84.8953882527166	81.5614272880452	73.8962712065612	45.5254898594224
88.6174437889139	88.6086814239387	88.4638267713186	88.1482276329019	87.5842321745894	86.6112855371803	84.8826832644645	81.545569756848	73.8728125093788	45.4686515185174
88.6077148021002	88.5989904183397	88.454088218386	88.1383076947912	87.5739041636376	86.6001504105693	84.869993086924	81.5297294619401	73.8493767958858	45.4118475196645
88.5979994246586	88.5893128776843	88.4443629974161	88.1284010139267	87.5635894865436	86.5890290171865	84.8573176937005	81.5139063736327	73.8259640287393	45.3550778068618
88.5882976328312	88.5796487782783	88.4346510846537	88.1185075663894	87.5532881190765	86.5779213321506	84.8446570584621	81.4981004623095	73.8025741706873	45.2983423242526
88.5786094028934	88.5699980964635	88.4249524563832	88.1086273283055	87.5430000370557	86.566827330636	84.8320111549399	81.4823116984266	73.7792071845691	45.2416410161249
88.5689347111541	88.560360808617	88.415267088929	88.0987602758458	87.5327252163509	86.5557469878735	84.8193799569272	81.466540052512	73.7558630333143	45.1849738269108
88.5592735339558	88.5507368911518	88.4055949586551	88.0889063852259	87.5224636328823	86.5446802791498	84.8067634382798	81.4507854951656	73.7325416799426	45.1283407011864
88.5496258476746	88.5411263205165	88.3959360419651	88.0790656327064	87.5122152626201	86.533627179807	84.7941615729156	81.4350479970589	73.7092430875638	45.0717415836707
88.5399916287203	88.5315290731957	88.3862903153025	88.0692379945922	87.5019800815845	86.5225876652431	84.7815743348144	81.4193275289347	73.6859672193772	45.0151764192254
88.5303708535365	88.5219451257095	88.3766577551504	88.0594234472331	87.4917580658458	86.5115617109115	84.7690016980179	81.4036240616067	73.6627140386714	44.9586451528547
88.5207634986005	88.5123744546143	88.3670383380314	88.0496219670235	87.4815491915242	86.5005492923208	84.7564436366292	81.3879375659598	73.639483508824	44.9021477297043
88.5111695404233	88.5028170365019	88.3574320405082	88.0398335304021	87.4713534347895	86.4895503850348	84.7439001248127	81.3722680129492	73.6162755933012	44.8456840950611
88.50158895555	88.4932728480001	88.3478388391828	88.0300581138524	87.4611707718611	86.4785649646723	84.7313711367941	81.3566153736005	73.5930902556575	44.789254194353
88.4920217205596	88.4837418657729	88.3382587106971	88.0202956939022	87.4510011790082	86.467593006907	84.7188566468601	81.3409796190096	73.5699274595354	44.732857973148
88.4824678120649	88.4742240665199	88.3286916317326	88.0105462471234	87.4408446325494	86.4566344874672	84.7063566293581	81.3253607203423	73.5467871686654	44.6764953771541
88.4729272067129	88.4647194269771	88.3191375790103	88.0008097501327	87.4307011088525	86.4456893821359	84.6938710586961	81.3097586488337	73.523669346865	44.6201663522184
88.4633998811846	88.455227923916	88.3095965292911	87.9910861795907	87.4205705843346	86.4347576667504	84.6813999093426	81.2941733757889	73.5005739580391	44.5638708443272
88.4538858121952	88.4457495341445	88.3000684593753	87.9813755122023	87.410453035462	86.4238393172023	84.6689431558264	81.2786048725817	73.4775009661793	44.5076087996049
88.444384976494	88.4362842345064	88.2905533461031	87.9716777247168	87.4003484387502	86.4129343094374	84.6565007727362	81.2630531106552	73.4544503353639	44.451380164314
88.4348973508644	88.4268320018817	88.281051166354	87.9619927939273	87.3902567707633	86.4020426194555	84.6440727347205	81.247518061521	73.4314220297571	44.3951848848545
88.4254229121243	88.4173928131865	88.2715618970472	87.952320696671	87.3801780081147	86.3911642233102	84.6316590164878	81.2319996967594	73.4084160136093	44.3390229077634
88.4159616371256	88.4079666453728	88.2620855151418	87.9426614098292	87.3701121274661	86.3802990971087	84.6192595928058	81.2164979880189	73.3854322512563	44.2828941797142
88.4065135027548	88.3985534754289	88.2526219976359	87.9330149103272	87.3600591055282	86.369447217012	84.6068744385016	81.2010129070161	73.3624707071194	44.2267986475166
88.3970784859325	88.3891532803795	88.2431713215677	87.9233811751339	87.3500189190602	86.3586085592343	84.5945035284615	81.1855444255354	73.3395313457049	44.1707362581159
88.387656563614	88.379766037285	88.2337334640147	87.9137601812623	87.3399915448695	86.3477831000432	84.5821468376308	81.1700925154288	73.3166141316037	44.1147069585928
88.3782477127887	88.3703917232424	88.2243084020938	87.9041519057692	87.3299769598122	86.3369708157595	84.5698043410134	81.1546571486158	73.2937190294914	44.0587106961624
88.3688519104807	88.3610303153848	88.2148961129618	87.8945563257549	87.3199751407925	86.3261716827568	84.557476013672	81.1392382970829	73.2708460041275	44.0027474181744
88.3594691337488	88.3516817908815	88.2054965738146	87.8849734183634	87.3099860647628	86.3153856774617	84.5451618307275	81.1238359328837	73.2479950203556	43.9468170721124
88.3500993596859	88.3423461269381	88.1961097618879	87.8754031607826	87.3000097087234	86.3046127763536	84.5328617673592	81.1084500281384	73.2251660431027	43.8909196055932
88.3407425654197	88.3330233007964	88.1867356544566	87.8658455302435	87.2900460497229	86.2938529559643	84.5205757988045	81.0930805550338	73.2023590373793	43.8350549663669
88.3313987281127	88.3237132897346	88.1773742288354	87.856300504021	87.2800950648574	86.2831061928782	84.5083039003585	81.077727485823	73.1795739682786	43.7792231023159
88.3220678249618	88.3144160710672	88.1680254623781	87.8467680594332	87.2701567312711	86.2723724637319	84.4960460473743	81.0623907928251	73.1568108009771	43.7234239614549
88.3127498331986	88.3051316221448	88.158689332478	87.8372481738416	87.2602310261556	86.2616517452141	84.4838022152623	81.047070448425	73.1340695007331	43.6676574919302
88.3034447300896	88.2958599203547	88.1493658165681	87.8277408246512	87.2503179267503	86.2509440140659	84.4715723794904	81.0317664250735	73.1113500328876	43.6119236420196
88.2941524929358	88.2866009431202	88.1400548921203	87.81824598931	87.2404174103418	86.2402492470798	84.4593565155835	81.0164786952866	73.0886523628632	43.5562223601314
88.2848730990732	88.2773546679011	88.1307565366463	87.8087636453095	87.2305294542643	86.2295674211005	84.4471545991239	81.0012072316456	73.0659764561643	43.5005535948046
88.2756065258724	88.2681210721936	88.1214707276969	87.799293770184	87.2206540358993	86.218898513024	84.4349666057503	80.9859520067968	73.0433222783765	43.444917294708
88.2663527507389	88.2589001335301	88.1121974428622	87.7898363415113	87.2107911326754	86.208242499798	84.4227925111585	80.9707129934512	73.0206897951667	43.3893134086403
88.257111751113	88.2496918294795	88.1029366597717	87.7803913369119	87.2009407220682	86.1975993584215	84.4106322911004	80.9554901643846	72.9980789722824	43.3337418855291
88.2478835044701	88.2404961376473	88.0936883560943	87.7709587340495	87.1911027816003	86.1869690659446	84.3984859213847	80.940283492437	72.9754897755517	43.2782026744308
88.2386679883202	88.2313130356749	88.0844525095379	87.7615385106305	87.1812772888415	86.1763515994687	84.3863533778759	80.9250929505126	72.9529221708829	43.2226957245302
88.2294651802084	88.2221425012405	88.0752290978498	87.7521306444045	87.1714642214081	86.1657469361461	84.3742346364946	80.9099185115796	72.9303761242645	43.16722098514
88.2202750577146	88.2129845120587	88.0660180988164	87.7427351131635	87.161663556963	86.1551550531798	84.3621296732173	80.89476014867	72.9078516017646	43.1117784057005
88.2110975984539	88.2038390458802	88.0568194902636	87.7333518947425	87.151875273216	86.1445759278235	84.3500384640762	80.8796178348793	72.8853485695307	43.0563679357792
88.2019327800762	88.1947060804925	88.047633250056	87.7239809670191	87.1420993479233	86.1340095373817	84.337960985159	80.8644915433662	72.8628669937897	43.0009895250699
88.1927805802664	88.1855855937193	88.0384593560978	87.7146223079136	87.1323357588873	86.123455859209	84.3258972126085	80.8493812473529	72.8404068408472	42.9456431233933
88.1836409767446	88.1764775634208	88.029297786332	87.7052758953888	87.1225844839571	86.1129148707105	84.313847122623	80.8342869201241	72.8179680770876	42.8903286806957
88.1745139472658	88.1673819674935	88.0201485187408	87.69594170745	87.1128455010278	86.1023865493415	84.3018106914556	80.8192085350276	72.7955506689737	42.8350461470489
88.1653994696202	88.1582987838707	88.0110115313455	87.6866197221451	87.1031187880405	86.0918708726072	84.2897878954144	80.8041460654736	72.7731545830465	42.77979547265
88.1562975216328	88.1492279905217	88.0018868022065	87.677309917564	87.0934043229825	86.0813678180627	84.2777787108621	80.7890994849346	72.7507797859249	42.7245766078206
88.1472080811641	88.1401695654524	87.9927743094231	87.6680122718394	87.083702083887	86.070877363313	84.2657831142158	80.7740687669453	72.7284262443053	42.669389503007
88.1381311261093	88.1311234867053	87.9836740311336	87.658726763146	87.0740120488331	86.0603994860126	84.2538010819473	80.7590538851024	72.7060939249617	42.6142341087792
88.1290666343992	88.1220897323591	87.9745859455155	87.6494533697008	87.0643341959455	86.0499341638658	84.2418325905822	80.7440548130643	72.6837827947451	42.5591103758309
88.1200145839993	88.1130682805292	87.9655100307849	87.6401920697628	87.0546685033947	86.0394813746259	84.2298776167005	80.7290715245508	72.6614928205833	42.5040182549788
88.1109749529105	88.1040591093671	87.956446265197	87.6309428416334	87.0450149493965	86.0290410960957	84.2179361369358	80.7141039933433	72.639223969481	42.4489576971627
88.1019477191689	88.095062197061	87.9473946270459	87.6217056636556	87.0353735122125	86.0186133061271	84.2060081279756	80.6991521932843	72.616976208519	42.3939286534447
88.0929328608457	88.0860775218355	87.9383550946645	87.6124805142148	87.0257441701493	86.008197982621	84.1940935665608	80.6842160982771	72.5947495048544	42.338931075009
88.0839303560472	88.0771050619516	87.9293276464246	87.6032673717381	87.0161269015592	85.9977951035272	84.182192429486	80.669295682286	72.57254382572	42.2839649131613
88.0749401829152	88.0681447957066	87.9203122607367	87.5940662146943	87.0065216848392	85.9874046468442	84.1703046935987	80.6543909193357	72.5503591384245	42.2290301193289
88.0659623196264	88.0591967014343	87.9113089160501	87.5848770215942	86.9969284984316	85.9770265906191	84.1584303357997	80.6395017835114	72.5281954103517	42.1741266450598
88.0569967443929	88.0502607575052	87.9023175908529	87.5756997709903	86.9873473208239	85.9666609129477	84.1465693330428	80.6246282489586	72.5060526089608	42.1192544420227
88.048043435462	88.0413369423257	87.8933382636719	87.5665344414767	86.9777781305481	85.956307591974	84.1347216623343	80.6097702898826	72.4839307017856	42.0644134620065
88.0391023711164	88.032425234339	87.8843709130725	87.5573810116892	86.9682209061812	85.9459666058903	84.1228873007334	80.5949278805486	72.4618296564349	42.0096036569199
88.0301735296737	88.0235256120246	87.8754155176589	87.548239460305	86.958675626345	85.9356379329369	84.1110662253517	80.5801009952816	72.4397494405916	41.9548249787911
88.0212568894871	88.0146380538983	87.8664720560737	87.5391097660428	86.9491422697056	85.9253215514024	84.0992584133532	80.5652896084659	72.417690022013	41.9000773797674
88.012352428945	88.0057625385124	87.8575405069984	87.5299919076629	86.939620814974	85.9150174396231	84.0874638419538	80.550493694545	72.3956513685303	41.8453608121148
88.0034601264708	87.9968990444556	87.8486208491527	87.5208858639667	86.9301112409053	85.904725575983	84.0756824884216	80.5357132280216	72.3736334480482	41.7906752282177
87.9945799605236	87.9880475503528	87.8397130612951	87.5117916137971	86.9206135262992	85.8944459389138	84.0639143300768	80.5209481834574	72.351636228545	41.7360205805788
87.9857119095975	87.9792080348654	87.8308171222224	87.5027091360381	86.9111276499994	85.8841785068948	84.0521593442908	80.5061985354725	72.3296596780724	41.6813968218182
87.9768559522219	87.9703804766912	87.8219330107701	87.493638409615	86.9016535908939	85.8739232584526	84.040417508487	80.4914642587459	72.3077037647547	41.6268039046734
87.9680120669616	87.9615648545642	87.8130607058119	87.484579413494	86.8921913279146	85.8636801721611	84.0286888001401	80.4767453280148	72.2857684567894	41.5722417819989
87.9591802324166	87.9527611472548	87.8042001862599	87.4755321266826	86.8827408400377	85.8534492266414	84.0169731967759	80.4620417180744	72.2638537224461	41.5177104067659
87.9503604272224	87.9439693335697	87.7953514310647	87.466496528229	86.8733021062828	85.8432304005614	84.0052706759716	80.4473534037781	72.241959530067	41.4632097320619
87.9415526300495	87.9351893923521	87.7865144192151	87.4574725972227	86.8638751057137	85.8330236726362	83.9935812153551	80.4326803600371	72.2200858480663	41.4087397110902
87.9327568196038	87.9264213024811	87.7776891297383	87.4484603127937	86.8544598174376	85.8228290216277	83.9819047926053	80.4180225618202	72.1982326449298	41.35430029717
87.9239729746266	87.9176650428725	87.7688755416997	87.4394596541129	86.8450562206054	85.8126464263441	83.9702413854518	80.4033799841536	72.1763998892152	41.2998914437354
87.9152010738944	87.9089205924781	87.760073634203	87.4304706003921	86.8356642944115	85.8024758656404	83.9585909716745	80.3887526021209	72.1545875495515	41.2455131043358
87.906441096219	87.9001879302861	87.7512833863898	87.4214931308836	86.8262840180938	85.7923173184183	83.9469535291041	80.3741403908627	72.1327955946388	41.1911652326349
87.8976930204476	87.8914670353208	87.7425047774402	87.4125272248802	86.8169153709334	85.7821707636252	83.935329035621	80.3595433255765	72.1110239932481	41.1368477824109
87.8889568254625	87.8827578866429	87.7337377865723	87.4035728617157	86.8075583322545	85.7720361802553	83.9237174691562	80.3449613815167	72.0892727142212	41.0825607075557
87.8802324901815	87.8740604633493	87.7249823930421	87.3946300207639	86.7982128814248	85.7619135473484	83.9121188076903	80.3303945339941	72.0675417264703	41.0283039620749
87.8715199935574	87.865374744573	87.716238576144	87.3856986814391	86.7888789978549	85.7518028439906	83.900533029254	80.3158427583762	72.0458309989779	40.9740775000876
87.8628193145787	87.8567007094832	87.70750631521	87.3767788231963	86.779556660998	85.7417040493137	83.8889601119275	80.3013060300863	72.0241405007965	40.9198812758254
87.8541304322688	87.8480383372854	87.6987855896104	87.3678704255305	86.7702458503508	85.7316171424952	83.8774000338404	80.2867843246042	72.0024702010485	40.8657152436329
87.8454533256865	87.839387607221	87.6900763787532	87.3589734679768	86.7609465454522	85.7215421027582	83.865852773172	80.2722776174653	71.9808200689259	40.8115793579667
87.8367879739259	87.8307484985679	87.6813786620845	87.3500879301109	86.7516587258842	85.7114789093715	83.8543183081506	80.2577858842608	71.9591900736899	40.7574735733956
87.8281343561164	87.8221209906397	87.672692419088	87.3412137915483	86.7423823712712	85.7014275416489	83.8427966170537	80.2433091006375	71.9375801846711	40.7033978446
87.8194924514225	87.8135050627864	87.6640176292855	87.3323510319445	86.7331174612801	85.6913879789499	83.8312876782078	80.2288472422976	71.9159903712689	40.6493521263715
87.8108622390442	87.804900694394	87.6553542722364	87.3234996309952	86.7238639756203	85.6813602006787	83.8197914699881	80.2144002849984	71.8944206029515	40.5953363736129
87.8022436982165	87.7963078648846	87.6467023275378	87.3146595684358	86.7146218940434	85.671344186285	83.8083079708186	80.1999682045524	71.8728708492556	40.5413505413376
87.7936368082096	87.7877265537163	87.6380617748247	87.3058308240417	86.7053911963434	85.661339915263	83.7968371591718	80.1855509768269	71.8513410797862	40.4873945846693
87.7850415483293	87.7791567403832	87.6294325937696	87.2970133776281	86.6961718623563	85.651347367152	83.7853790135686	80.1711485777439	71.8298312642164	40.4334684588419
87.7764578979161	87.7705984044153	87.6208147640827	87.2882072090498	86.6869638719603	85.6413665215359	83.7739335125782	80.15676098328	71.8083413722873	40.3795721191991
87.7678858363462	87.762051525379	87.6122082655117	87.2794122982013	86.6777672050754	85.631397358043	83.7625006348179	80.1423881694661	71.7868713738075	40.3257055211941
87.7593253430306	87.7535160828761	87.6036130778419	87.2706286250167	86.6685818416637	85.6214398563464	83.7510803589531	80.1280301123875	71.7654212386531	40.2718686203889
87.7507763974157	87.7449920565448	87.5950291808962	87.2618561694698	86.6594077617289	85.6114939961633	83.7396726636969	80.1136867881834	71.7439909367676	40.2180613724548
87.7422389789831	87.7364794260591	87.5864565545347	87.2530949115736	86.6502449453165	85.6015597572552	83.7282775278103	80.099358173047	71.7225804381615	40.1642837331713
87.7337130672494	87.7279781711286	87.5778951786552	87.2443448313807	86.6410933725136	85.5916371194279	83.7168949301018	80.0850442432251	71.7011897129119	40.1105356584264
87.7251986417664	87.7194882714992	87.5693450331927	87.2356059089829	86.6319530234488	85.5817260625309	83.7055248494273	80.0707449750183	71.679818731163	40.0568171042158
87.7166956821211	87.7110097069525	87.5608060981196	87.2268781245114	86.6228238782922	85.5718265664579	83.6941672646903	80.0564603447805	71.658467463125	40.0031280266431
87.7082041679356	87.7025424573059	87.5522783534457	87.2181614581365	86.6137059172552	85.5619386111462	83.682822154841	80.0421903289188	71.6371358790747	39.949468381919
87.6997240788672	87.6940865024125	87.5437617792179	87.2094558900678	86.6045991205905	85.552062176577	83.6714894988772	80.0279349038935	71.6158239493546	39.8958381263614
87.6912553946082	87.6856418221613	87.5352563555204	87.2007614005539	86.595503468592	85.5421972427748	83.6601692758434	80.0136940462177	71.5945316443732	39.842237216395
87.6827980948859	87.6772083964773	87.5267620624746	87.1920779698824	86.5864189415946	85.5323437898077	83.6488614648308	79.9994677324575	71.5732589346048	39.7886656085507
87.6743521594628	87.6687862053207	87.5182788802389	87.1834055783798	86.5773455199743	85.5225017977873	83.6375660449773	79.9852559392315	71.5520057905888	39.735123259466
87.6659175681365	87.6603752286878	87.5098067890089	87.1747442064117	86.5682831841478	85.5126712468683	83.6262829954675	79.9710586432108	71.5307721829301	39.6816101258838
87.6574943007394	87.6519754466106	87.5013457690173	87.1660938343823	86.5592319145731	85.5028521172485	83.6150122955323	79.9568758211187	71.5095580822984	39.628126164653
87.6490823371393	87.6435868391565	87.4928958005336	87.1574544427347	86.5501916917484	85.4930443891688	83.6037539244489	79.9427074497308	71.4883634594284	39.5746713327276
87.6406816572386	87.6352093864288	87.4844568638645	87.1488260119507	86.5411624962129	85.483248042913	83.5925078615406	79.9285535058748	71.4671882851196	39.5212455871667
87.632292240975	87.6268430685662	87.4760289393534	87.1402085225507	86.5321443085463	85.4734630588078	83.5812740861767	79.9144139664301	71.4460325302355	39.4678488851341
87.6239140683211	87.6184878657431	87.4676120073808	87.1316019550937	86.5231371093687	85.4636894172226	83.5700525777725	79.9002888083277	71.4248961657042	39.4144811838982
87.6155471192843	87.6101437581695	87.4592060483639	87.1230062901771	86.5141408793407	85.4539270985692	83.558843315789	79.8861780085504	71.4037791625179	39.3611424408314
87.607191373907	87.6018107260907	87.4508110427567	87.1144215084369	86.5051555991631	85.4441760833021	83.5476462797329	79.8720815441323	71.3826814917324	39.3078326134101
87.5988468122667	87.5934887497877	87.4424269710498	87.1058475905473	86.4961812495771	85.4344363519182	83.5364614491563	79.8579993921586	71.3616031244674	39.2545516592143
87.5905134144756	87.585177809577	87.4340538137708	87.0972845172212	86.4872178113638	85.4247078849565	83.5252888036568	79.8439315297659	71.340544031906	39.2012995359275
87.5821911606809	87.5768778858103	87.4256915514838	87.0887322692092	86.4782652653446	85.4149906629983	83.5141283228771	79.8298779341415	71.3195041852946	39.1480762013361
87.5738800310646	87.568588958875	87.4173401647895	87.0801908273004	86.4693235923807	85.4052846666672	83.5029799865052	79.8158385825236	71.2984835559428	39.0948816133293
87.5655800058435	87.5603110091937	87.4089996343251	87.0716601723221	86.4603927733733	85.3955898766283	83.4918437742741	79.8018134522011	71.2774821152229	39.041715729899
87.5572910652694	87.5520440172244	87.4006699407644	87.0631402851395	86.4514727892632	85.3859062735888	83.4807196659616	79.7878025205132	71.2564998345701	38.9885785091393
87.5490131896286	87.5437879634605	87.3923510648177	87.0546311466558	86.4425636210312	85.3762338382978	83.4696076413903	79.7738057648497	71.2355366854822	38.9354699092462
87.5407463592424	87.5355428284306	87.3840429872318	87.0461327378122	86.4336652496975	85.3665725515458	83.4585076804274	79.7598231626505	71.2145926395192	38.8823898885176
87.5324905544669	87.5273085926986	87.3757456887897	87.0376450395877	86.424777656322	85.356922394165	83.4474197629847	79.7458546914055	71.1936676683034	38.8293384053528
87.5242457556928	87.5190852368636	87.3674591503108	87.0291680329991	86.415900822004	85.347283347029	83.4363438690184	79.7319003286546	71.1727617435191	38.7763154182524
87.5160119433455	87.5108727415599	87.3591833526509	87.0207016991011	86.4070347278821	85.3376553910527	83.4252799785287	79.7179600519876	71.1518748369122	38.7233208858176
87.5077890978853	87.5026710874571	87.3509182767019	87.0122460189857	86.3981793551342	85.3280385071924	83.4142280715605	79.7040338390436	71.1310069202905	38.6703547667508
87.4995771998068	87.4944802552599	87.342663903392	87.003800973783	86.3893346849777	85.3184326764454	83.4031881282021	79.6901216675116	71.1101579655232	38.6174170198545
87.4913762296396	87.4863002257079	87.3344202136855	86.9953665446602	86.3805006986687	85.30883787985	83.3921601285861	79.6762235151295	71.0893279445405	38.5645076040313
87.4831861679478	87.4781309795761	87.3261871885829	86.9869427128222	86.3716773775027	85.2992540984857	83.3811440528889	79.6623393596849	71.0685168293341	38.5116264782841
87.47500699533	87.4699724976743	87.3179648091206	86.9785294595112	86.3628647028138	85.2896813134723	83.3701398813304	79.6484691790139	71.0477245919562	38.4587736017151
87.4668386924195	87.4618247608474	87.3097530563712	86.970126766007	86.3540626559753	85.280119505971	83.359147594174	79.634612951002	71.02695120452	38.4059489335259
87.4586812398841	87.4536877499753	87.3015519114432	86.9617346136263	86.3452712183992	85.2705686571831	83.3481671717268	79.6207706535833	71.0061966391992	38.3531524330176
87.4505346184261	87.4455614459729	87.293361355481	86.9533529837234	86.3364903715361	85.2610287483507	83.3371985943391	79.6069422647404	70.9854608682277	38.3003840595899
87.4423988087823	87.4374458297898	87.2851813696648	86.9449818576895	86.3277200968753	85.2514997607563	83.3262418424042	79.5931277625047	70.9647438638999	38.2476437727412
87.4342737917241	87.4293408824108	87.2770119352107	86.9366212169529	86.3189603759447	85.2419816757226	83.3152968963587	79.5793271249557	70.94404559857	38.1949315320683
87.426159548057	87.4212465848553	87.2688530333706	86.928271042979	86.3102111903105	85.2324744746127	83.3043637366821	79.5655403302212	70.9233660446521	38.1422472972663
87.4180560586214	87.4131629181775	87.2607046454323	86.9199313172703	86.3014725215776	85.2229781388297	83.2934423438967	79.5517673564772	70.9027051746199	38.089591028128
87.4099633042917	87.4050898634667	87.2525667527189	86.9116020213659	86.2927443513887	85.2134926498168	83.2825326985676	79.5380081819475	70.8820629610068	38.0369626845441
87.4018812659769	87.3970274018465	87.2444393365894	86.9032831368418	86.2840266614252	85.204017989057	83.2716347813025	79.5242627849037	70.8614393764054	37.9843622265026
87.3938099246202	87.3889755144755	87.2363223784383	86.8949746453111	86.2753194334064	85.1945541380734	83.2607485727515	79.5105311436652	70.8408343934673	37.9317896140886
87.3857492611992	87.3809341825469	87.2282158596958	86.8866765284232	86.2666226490897	85.1851010784287	83.2498740536073	79.4968132365989	70.8202479849035	37.8792448074843
87.3776992567256	87.3729033872886	87.2201197618274	86.8783887678643	86.2579362902704	85.1756587917251	83.2390112046045	79.4831090421191	70.7996801234834	37.8267277669685
87.3696598922457	87.364883109963	87.212034066334	86.8701113453571	86.2492603387817	85.1662272596045	83.2281600065203	79.4694185386873	70.7791307820354	37.7742384529165
87.3616311488396	87.3568733318672	87.2039587547522	86.861844242661	86.2405947764947	85.1568064637482	83.2173204401736	79.4557417048123	70.758599933446	37.7217768258
87.353613007622	87.3488740343326	87.1958938086536	86.8535874415716	86.2319395853182	85.1473963858768	83.2064924864253	79.4420785190497	70.7380875506602	37.6693428461864
87.3456054497416	87.3408851987253	87.1878392096453	86.845340923921	86.2232947471986	85.1379970077504	83.1956761261783	79.4284289600021	70.7175936066813	37.616936474739
87.337608456381	87.3329068064459	87.1797949393696	86.8371046715777	86.2146602441199	85.1286083111678	83.184871340377	79.4147930063189	70.6971180745704	37.5645576722168
87.3296220087574	87.3249388389293	87.171760979504	86.8288786664464	86.2060360581036	85.1192302779672	83.1740781100074	79.4011706366959	70.6766609274465	37.5122063994737
87.3216460881217	87.3169812776448	87.1637373117612	86.8206628904677	86.1974221712085	85.1098628900256	83.163296416097	79.3875618298757	70.656222138486	37.4598826174592
87.3136806757589	87.309034104096	87.1557239178889	86.8124573256189	86.1888185655308	85.1005061292591	83.1525262397148	79.3739665646468	70.6358016809232	37.4075862872171
87.3057257529882	87.301097299821	87.14772077967	86.8042619539128	86.1802252232039	85.0911599776222	83.1417675619709	79.3603848198444	70.6153995280494	37.3553173698863
87.2978441786635	87.2932343611527	87.1397934525115	86.7961461093915	86.1717176054616	85.081909641502	83.1311217099305	79.3469474874051	70.5952144984973	37.3035864953288
87.2901926975417	87.2856036178883	87.1321053917442	86.7882826563889	86.1634838373301	85.0729675229854	83.1208412539156	79.3339808228695	70.5757422199791	37.2536686819193
87.2827702275945	87.2782039755976	87.1246554634	86.7806703881251	86.1555225929344	85.064332104374	83.1109243540553	79.3214823886766	70.5569789378291	37.2055567060335
87.2755756898133	87.2710343428475	87.1174425365576	86.7733081009517	86.1478325496166	85.0560018711604	83.1013691731282	79.3094497486598	70.5389209516979	37.1592431957913
87.2686080082089	87.264093631204	87.1104654833448	86.7661945943539	86.140412387936	85.0479753120225	83.0921738765758	79.297880470794	70.5215646009796	37.1147206569534
87.26186610981	87.2573807552339	87.10372317894	86.7593286709524	86.1332607916703	85.0402509188171	83.0833366326205	79.2867721289425	70.50490625468	37.0719814913996
87.2553489246634	87.2508946325067	87.0972145015741	86.7527091365046	86.1263764478154	85.032827186579	83.0748556124412	79.2761223039343	70.4889423043663	37.0310180104272
87.2490553858331	87.244634183596	87.0909383325316	86.7463347999067	86.1197580465856	85.0257026135247	83.0667289903747	79.265928584193	70.4736691592577	36.9918224444312
87.2429844293997	87.2385983320813	87.0848935561529	86.7402044731943	86.1134042814132	85.0188757010635	83.0589549441244	79.2561885660741	70.4590832428045	36.9543869500505
87.2371349944597	87.2327860045488	87.0790790598345	86.7343169715439	86.1073138489489	85.0123449538133	83.0515316549629	79.2468998540114	70.4451809903006	36.9187036155405
87.2315060231253	87.227196130593	87.073493734031	86.7286711132736	86.1014854490622	85.0061088796238	83.0444573079239	79.2380600605444	70.431958847217	36.8847644648968
87.2260964605234	87.2218276428174	87.0681364722562	86.7232657198442	86.0959177848423	85.0001659896023	83.0377300919782	79.2296668062722	70.4194132680351	36.8525614611031
87.2209052547955	87.2166794768355	87.0630061710831	86.7180996158592	86.0906095625997	84.9945147981449	83.0313482001932	79.2217177197662	70.4075407154305	36.822086508759
87.2159313570966	87.2117505712717	87.0581017301461	86.7131716290661	86.0855594918686	84.98915382297	83.0253098298762	79.2142104374599	70.3963376597002	36.7933314562702
87.2111737215946	87.2070398677619	87.0534220521403	86.7084805903564	86.08076628541	84.9840815851543	83.0196131827014	79.2071426035311	70.3858005783606	36.7662880977274
87.2066313054703	87.202546310954	87.0489660428232	86.7040253337661	86.0762286592149	84.9792966091708	83.0142564648219	79.2005118697824	70.3759259558653	36.740948174565
87.2021564203034	87.1981207143216	87.0445796752492	86.6996429474957	86.0717692900422	84.9745986422288	83.0090014815552	79.194010457482	70.3662461000517	36.7161080669868
87.1978954592377	87.1939109532441	87.0404156167995	86.6954948943592	86.0675639043244	84.9701860998494	83.0040841964952	79.1879432627506	70.3572245187508	36.6929611614427
87.1938473858009	87.1899159787296	87.0364727796814	86.6915800149837	86.0636112247875	84.9660575138118	82.9995028267655	79.1823079574598	70.3488576726969	36.6714991473962
87.1900111665346	87.1861347448015	87.0327500791681	86.6878971531449	86.0599099774146	84.9622114194561	82.995255594316	79.1771022186164	70.3411420403921	36.6517136465191
87.1863857709928	87.1825662084987	87.0292464335986	86.6844451557683	86.0564588914535	84.9586463557224	82.9913407258997	79.1723237290509	70.3340741146029	36.6335962197386
87.1829701717415	87.1792093298756	87.0259607643777	86.6812228729294	86.0532566994249	84.9553608651853	82.9877564530785	79.1679701778589	70.3276503999301	36.6171383724944
87.1797633443577	87.1760630720019	87.0228919959759	86.6782291578545	86.050302137131	84.9523534940873	82.9845010122467	79.164039260676	70.3218674111239	36.6023315587475
87.1767642674282	87.1731264009625	87.0200390559295	86.6754628669217	86.0475939436645	84.9496227923696	82.981572644664	79.1605286798402	70.3167216719179	36.589167184119
87.1739719225486	87.170398285857	87.0174008748399	86.6729228596617	86.045130861418	84.9471673137025	82.9789695964921	79.1574361444809	70.3122097142226	36.577636608422
87.1713852943223	87.1678776987991	87.0149763863736	86.6706079987587	86.0429116360933	84.9449856155149	82.9766901188334	79.1547593705595	70.3083280775693	36.5677311477688
87.1690033703592	87.1655636149164	87.012764527262	86.6685171500515	86.0409350167112	84.9430762590226	82.9747324677668	79.1524960808783	70.3050733087287	36.5594420763816
87.1668251412748	87.1634550123494	87.0107642373004	86.6666491825351	86.0391997556212	84.9414378092562	82.9730949043825	79.1506440050699	70.3024419614509	36.5527606281946
87.1648496006883	87.161550872251	87.0089744593478	86.6650029683614	86.0377046085116	84.9400688350885	82.9717756948136	79.149200879576	70.3004305962907	36.5476779983095
87.1630757452221	87.1598501787856	87.0073941393265	86.6635773828407	86.0364483344194	84.9389679092601	82.9707731102645	79.1481644476184	70.2990357804913	36.5441853443485
87.1615025744996	87.1583519191281	87.0060222262211	86.6623713044435	86.0354296957406	84.9381336084057	82.9700854270359	79.1475324591673	70.2982540879112	36.5422737877339
87.1601290911445	87.1570550834628	87.0048576720782	86.6613836148015	86.0346474582402	84.9375645130778	82.9697109265474	79.1473026709092	70.2980820989794	36.5419344149154
87.1589543007788	87.1559586649825	87.0038994320055	86.6606131987098	86.0341003910624	84.937259207771	82.9696478953567	79.1474728462141	70.2985164006715	36.5431582785607
87.1578407407193	87.1549238073067	87.0030041452904	86.6599084265637	86.0336234513821	84.9370313098833	82.9696746455231	79.1477565376786	70.2991216349313	36.5448242626824
87.1569246316601	87.154088108714	87.0023138662707	86.6594195323835	86.0333801395353	84.9370654272514	82.9700107267021	79.1484374436878	70.3003290668531	36.548042079168
87.1562049855795	87.1534505687903	87.0018275565444	86.6591454076612	86.0333692319038	84.9373601532025	82.9706544378397	79.1495133449637	70.3021352610237	36.5528027704227
87.1556808174522	87.1530101901278	87.001544180771	86.6590849470624	86.0335895082943	84.9379140851008	82.9716040830943	79.1509820268596	70.3045367993829	36.5590973298634
87.155351145248	87.1527659783238	87.0014627066706	86.659237048429	86.0340397519478	84.9387258243667	82.9728579717691	79.1528412800653	70.3075302779459	36.5669167086239
87.1552149899298	87.1527169419792	87.0015821050234	86.6596006127806	86.0347187495502	84.9397939764918	82.9744144182777	79.1550889010723	70.3111123045371	36.5762518205699
87.1552713754515	87.1528620926971	87.0019013496682	86.6601745443172	86.0356252912415	84.9411171510526	82.9762717421312	79.1577226924748	70.3152794972267	36.5870935461362
87.1555193287559	87.1532004450811	87.0024194175022	86.6609577504213	86.0367581706256	84.9426939617219	82.9784282679372	79.1607404631594	70.3200284832541	36.5994327353416
87.1559578797731	87.1537310167333	87.0031352884798	86.6619491416595	86.0381161847791	84.9445230262804	82.9808823254073	79.1641400284211	70.3253558982902	36.6132602102304
87.156586061418	87.1544528282533	87.0040479456115	86.6631476317855	86.0396981342606	84.9466029666269	82.9836322493674	79.1679192100282	70.331258385934	36.6285667669106
87.1574029095881	87.1553649032355	87.0051563749634	86.6645521377416	86.0415028231186	84.9489324087884	82.98667637977	79.1720758362554	70.3377325973739	36.645343177311
87.1584074631617	87.1564662682682	87.0064595656561	86.6661615796615	86.0435290589002	84.9515099829306	82.9900130617065	79.176607741895	70.3447751911615	36.6635801907375
87.1595987639951	87.1577559529308	87.0079565098632	86.6679748808719	86.0457756526588	84.9543343233668	82.9936406454185	79.1815127682545	70.3523828330647	36.683268535289
87.1609758569205	87.1592329897925	87.0096462028114	86.669990967895	86.0482414189617	84.9574040685677	82.9975574863078	79.1867887631459	70.3605521959767	36.7043989191718
87.1625377897438	87.1608964144097	87.0115276427784	86.6722087704504	86.0509251758973	84.9607178611701	83.0017619449455	79.1924335808706	70.3692799598627	36.7269620319414
87.1642836132417	87.1627452653245	87.0135998310926	86.6746272214576	86.0538257450825	84.9642743479859	83.0062523870785	79.1984450822008	70.3785628117332	36.7509485456906
87.1662123811597	87.1647785840622	87.0158617721317	86.6772452570374	86.0569419516694	84.9680721800102	83.0110271836356	79.2048211343606	70.3883974456374	36.7763491161982
87.168196264201	87.1668672464063	87.0181801555113	86.6799218818465	86.0601203355109	84.9719380698992	83.0158802487465	79.2112954940245	70.3983793450868	36.80212445039
87.1703619035563	87.1691391723126	87.0206870395276	86.6827967515184	86.0635128755306	84.9760436059249	83.0210156299432	79.2181317750777	70.4089090295361	36.8293017303131
87.1727083592979	87.1715934096822	87.0233814350731	86.6858688090445	86.067118404608	84.9803874485687	83.0264317105421	79.2253278612105	70.4199831746046	36.8578716387308
87.1752346944618	87.1742290093945	87.02626235609	86.68913700063	86.0709357591888	84.9849682625348	83.0321268790723	79.232881640716	70.4315984730002	36.8878248281319
87.1779399750447	87.1770450253049	87.0293288195683	86.6926002756959	86.0749637792897	84.9897847167569	83.0380995292047	79.2407910071469	70.4437516314974	36.9191519269629
87.1808232700011	87.1800405142425	87.0325798455454	86.6962575868808	86.0792013085049	84.9948354844014	83.0443480597124	79.2490538597495	70.4564393688512	36.9518435442903
87.1838836512409	87.1832145360076	87.0360144571045	86.7001078900425	86.0836471940104	85.0001192428689	83.0508708744508	79.2576681037462	70.4696584143606	36.9858902733673
87.1871201936257	87.1865661533697	87.0396316803736	86.7041501442597	86.0883002865694	85.0056346737951	83.0576663823511	79.2666316505139	70.4834055068829	37.0212826944342
87.1905319749665	87.1900944320644	87.0434305445245	86.7083833118334	86.0931594405365	85.0113804630512	83.064732997419	79.2759424176947	70.4976773941615	37.0580113769838
87.1941180760206	87.1937984407916	87.047410081771	86.7128063582889	86.0982235138615	85.0173553007443	83.0720691387391	79.2855983292587	70.5124708323691	37.0960668816479
87.1978775804884	87.1976772512127	87.0515693273685	86.7174182523764	86.1034913680937	85.0235578812175	83.0796732304796	79.2955973155371	70.5277825858038	37.1354397618187
87.2018095750103	87.2017299379478	87.055907319612	86.7222179660731	86.1089618683847	85.0299869030503	83.0875437018983	79.3059373132355	70.5436094266878	37.1761205650802
87.2059131491637	87.2059555785735	87.0604230998351	86.7272044745836	86.1146338834921	85.036641069059	83.0956789873471	79.316616265434	70.5599481350409	37.2180998345044
87.2101873954602	87.21035325362	87.0651157124087	86.7323767563416	86.1205062857817	85.0435190862971	83.1040775262766	79.3276321215798	70.576795498603	37.261368109849
87.2146314093415	87.2149220465686	87.0699842047396	86.7377337930104	86.1265779512303	85.0506196660555	83.1127377632387	79.3389828374748	70.5941483127923	37.3059159286832
87.2192442891772	87.2196610438488	87.0750276272689	86.7432745694843	86.1328477594282	85.0579415238631	83.1216581478889	79.3506663752617	70.6120033806884	37.3517338274596
87.223906704349	87.2244497073551	87.0801215376492	86.7488674764423	86.1391724782188	85.0653229431123	83.1306463919335	79.3624343936258	70.6299836632545	37.3978575008468
87.2287368482186	87.2294074219242	87.0853891781465	86.7546428385627	86.1456939210464	85.072924017597	83.1398928392152	79.3745327124596	70.6484623062527	37.4452388888183
87.2337338254248	87.2345332803208	87.0908296057359	86.7605996477527	86.1524109754918	85.0807434724874	83.149395951503	79.3869593099055	70.6674360989787	37.4938685854729
87.2388967435262	87.2398263782517	87.0964418804261	86.7667368991575	86.1593225327625	85.0887800372032	83.1591541956893	79.3997121687754	70.6869018475032	37.5437371711912
87.2442247129982	87.2452858143624	87.1022250652572	86.7730535911609	86.166427487694	85.0970324454136	83.1691660437222	79.4127892771472	70.7068563719312	37.5948352182632
87.2497168472294	87.2509106902344	87.1081782262995	86.7795487253856	86.173724738751	85.1054994350347	83.1794299725668	79.4261886287597	70.7272965045117	37.6471532950888
87.255372262518	87.2567001103822	87.1143004326515	86.7862213066929	86.1812131880281	85.1141797482251	83.1899444641844	79.439908223269	70.7482190883371	37.7006819693814
87.2611900780685	87.262653182251	87.1205907564387	86.7930703431833	86.1888917412505	85.1230721313813	83.2007080055225	79.4539460664115	70.7696209764527	37.755411810674
87.2671694159879	87.2687690162128	87.1270482728114	86.800094846196	86.196759307774	85.1321753351331	83.2117190885122	79.4683001701039	70.7914990312494	37.8113333923361
87.2733094012825	87.2750467255643	87.133672059943	86.8072938303088	86.2048148005852	85.1414881143385	83.2229762100686	79.4829685525015	70.8138501240535	37.8684372932445
87.2796091618539	87.2814854265234	87.1404611990284	86.8146663133377	86.213057136301	85.1510092280792	83.2344778720924	79.4979492380286	70.8366711348536	37.9267140992108
87.2860678284955	87.2880842382264	87.1474147742818	86.8222113163366	86.221485235168	85.1607374396559	83.2462225814727	79.5132402573905	70.8599589521223	37.9861544042324
87.2926845348892	87.2948422827245	87.1545318729348	86.8299278635966	86.2300980210614	85.1706715165843	83.2582088500887	79.5288396475748	70.8837104727031	38.0467488116191
87.299458417601	87.3017586849815	87.1618115852348	86.8378149826448	86.2388944214846	85.1808102305906	83.2704351948112	79.5447454518447	70.9079226017436	38.1084879350261
87.3063886160781	87.3088325728698	87.1692530044422	86.8458717042444	86.2478733675672	85.1911523576076	83.2829001375027	79.5609557197292	70.9325922526604	38.1713623994203
87.3134742726446	87.3160630771677	87.176855226829	86.8540970623929	86.2570337940637	85.2016966777705	83.2956022050167	79.5774685070098	70.9577163471255	38.2353628419937
87.3207145324979	87.3234493315562	87.1846173516763	86.8624900943212	86.2663746393522	85.2124419754132	83.308539929196	79.5942818757074	70.9832918150683	38.300479913037
87.3279986135111	87.3308794346098	87.1924238579173	86.8709286351094	86.2757629659762	85.2232381845741	83.3215349238334	79.6111655501728	71.0089694603853	38.3658267578755
87.3354362145431	87.3384641888867	87.2003891227407	86.8795336256879	86.2853303619916	85.234233830821	83.3347637284822	79.6283473978632	71.0350947142982	38.4322779840399
87.3430264869771	87.3462027343433	87.2085122519609	86.8883041103753	86.2950757738472	85.2454277080446	83.3482248867525	79.6458254964276	71.0616644981908	38.4998243260675
87.3507685850605	87.3540942138305	87.2167923543971	86.8972391367238	86.3049981516146	85.2568186143305	83.3619169472545	79.663597928278	71.0886757497494	38.5684565204006
87.3586616659011	87.3621377730905	87.2252285418718	86.9063377555175	86.3150964489852	85.2684053519553	83.3758384635354	79.6816627811168	71.1161254205585	38.6381653102468
87.3667048894633	87.3703325607529	87.2338199292076	86.9155990207708	86.3253696232682	85.2801867273799	83.3899879940424	79.7000181482857	71.1440104744424	38.7089414491908
87.3748974185637	87.378677728332	87.242565634225	86.925021989726	86.3358166353879	85.292161551243	83.4043641021011	79.7186621289934	71.1723278863259	38.7807757039324
87.3832384188677	87.3871724302229	87.2514647777396	86.9346057228521	86.3464364498805	85.3043286383523	83.4189653559041	79.7375928284611	71.2010746414532	38.8536588564141
87.391727058885	87.3958158236986	87.2605164835598	86.9443492838419	86.3572280348917	85.3166868076778	83.4337903285062	79.756808358011	71.2302477348567	38.9275817055183
87.4003625099659	87.4046070689058	87.2697198784836	86.9542517396102	86.3681903621727	85.3292348823426	83.4488375978216	79.7763068351201	71.2598441709983	39.0025350684612
87.4091439462971	87.4135453288618	87.2790740922962	86.9643121602915	86.3793224070767	85.3419716896167	83.4641057466238	79.796086383447	71.2898609635304	39.0785097819711
87.4180705448976	87.4226297694508	87.288578257767	86.9745296192372	86.3906231485559	85.3548960609086	83.4795933625456	79.8161451328449	71.3202951351399	39.1554967033116
87.4271414856148	87.4318595594207	87.2982315106467	86.984903193013	86.4020915691565	85.3680068317584	83.4952990380782	79.8364812193623	71.3511437174504	39.2334867111935
87.4363559511203	87.4412338703788	87.3080329896644	86.9954319613967	86.4137266550156	85.3813028418311	83.5112213705709	79.8570927852394	71.3824037509634	39.3124707066036
87.4457131269057	87.4507518767887	87.3179818365245	87.0061150073747	86.4255273958565	85.3947829349096	83.5273589622287	79.8779779788991	71.4140722850277	39.3924396135726
87.4552122012784	87.4604127559662	87.3280771959037	87.0169514171396	86.4374927849841	85.4084459588877	83.5437104201108	79.8991349549368	71.4461463778278	39.4733843798958
87.4648523653577	87.4702156880759	87.3383182154477	87.0279402800868	86.4496218192812	85.4222907657641	83.5602743561262	79.9205618741093	71.4786230963855	39.5552959778169
87.4745308582065	87.4800568758341	87.3485977460315	87.0389682954627	86.4617912253659	85.4361782294744	83.576885445024	79.9420454541889	71.5111795174787	39.6373615580509
87.4843494111881	87.4900390720506	87.359021849695	87.0501476018788	86.4741229975163	85.4502460174736	83.5937072607376	79.9637966817894	71.5441349469321	39.7203821783984
87.4943072215076	87.5001614630866	87.369589680577	87.0614772958014	86.4866161406162	85.4644929910955	83.6107384265631	79.9858137330607	71.5774864485771	39.8043489143041
87.5044034891714	87.5104232381423	87.3803003957784	87.0729564768922	86.4992696631157	85.4789180157656	83.6279775706558	80.0080947890327	71.6112311019583	39.8892528559919
87.514637416983	87.5208235892523	87.3911531553578	87.0845842480057	86.5120825770266	85.4935199609954	83.6454233259741	80.0306380360697	71.6453660002778	39.9750851125156
87.5250082105385	87.5313617112824	87.4021471223286	87.0963597151849	86.5250538979171	85.5082977003737	83.6630743302439	80.0534416661713	71.6798882489784	40.0618368147474
87.5355150782222	87.5420368019255	87.4132814626552	87.1082819876578	86.5381826449069	85.523250111558	83.6809292259388	80.0765038771687	71.7147949647698	40.1494991176259
87.5461572312025	87.5528480616973	87.4245553452495	87.1203501778334	86.551467840662	85.5383760762649	83.6989866602682	80.0998228728505	71.750083274961	40.2380632018836
87.5569338834271	87.5637946939327	87.435967941967	87.1325634012979	86.5649085113891	85.5536744802606	83.7172452851703	80.1233968630407	71.7857503170053	40.3275202754093
87.5678442516191	87.5748759047813	87.4475184276031	87.1449207768109	86.5785036868304	85.5691442133517	83.7357037573086	80.1472240636449	71.8217932381936	40.4178615743513
87.5788875552719	87.5860909032039	87.4592059798895	87.1574214263006	86.5922524002572	85.584784169376	83.7543607380701	80.1713026966747	71.858209195449	40.5090783640371
87.5900630166453	87.5974389009678	87.4710297794901	87.1700644748603	86.6061536884647	85.6005932461935	83.7732148935625	80.1956309902591	71.8949953551928	40.6011619397603
87.6013698607606	87.6089191126428	87.4829890099971	87.1828490507436	86.6202065917657	85.6165703456779	83.7922648946133	80.2202071786465	71.9321488932593	40.6941036274719
87.6128073153965	87.6205307555973	87.495082857927	87.1957742853604	86.6344101539845	85.6327143737079	83.8115094167668	80.2450295022012	71.9696669948446	40.7878947844004
87.6243746110842	87.6322730499935	87.5073105127167	87.2088393132717	86.6487634224505	85.649024240159	83.8309471402815	80.2700962073965	72.0075468544786	40.8825267996183
87.636070981103	87.6441452187836	87.5196711667188	87.2220432721858	86.6632654479925	85.6654988588954	83.8505767501263	80.2954055468065	72.0457856760137	40.9779910945687
87.647800715662	87.6560505888727	87.5320650308347	87.2352806547618	86.6778014548167	85.6820087249318	83.8702444119198	80.3207592019564	72.0840837205742	41.0735405501865
87.659658545032	87.6680848397986	87.5445908605738	87.2486558645528	86.6924850053455	85.698681959969	83.8901022960996	80.3463533018274	72.1227372647404	41.1699111604687
87.6716437084705	87.6802472006149	87.557247854703	87.2621680462471	86.7073151582495	85.7155174869319	83.9101490986648	80.3721861142508	72.1617435140696	41.2670944609235
87.6837554479714	87.6925369031534	87.5700352148941	87.2758163476672	86.7222909756807	85.7325142327169	83.9303835203361	80.3982559120565	72.2010996891786	41.3650820112608
87.6959930082604	87.7049531820192	87.5829521457198	87.2895999197649	86.7374115232662	85.7496711281837	83.9508042665063	80.4245609734574	72.2408030240182	41.4638653986839
87.7083556367898	87.7174952745866	87.5959978546489	87.3035179166162	86.7526758701014	85.7669871081466	83.9714100472089	80.4510995823031	72.2808507646835	41.5634362402986
87.7208425837345	87.7301624209945	87.6091715520416	87.317569495416	86.7680830887434	85.7844611113649	83.9921995770989	80.4778700282473	72.3212401685957	41.6637861849049
87.7334531019866	87.7429538641416	87.6224724511456	87.3317538164732	86.7836322552045	85.8020920805327	84.0131715754408	80.5048706068542	72.3619685039404	41.764906914356
87.7461864471508	87.7558688496821	87.6358997680906	87.346070043205	86.7993224489451	85.8198789622688	84.0343247661016	80.5320996196651	72.4030330492846	41.8667901446131
87.7590418775398	87.7689066260213	87.6494527218843	87.3605173421318	86.8151527528667	85.8378207071066	84.055657877546	80.5595553742379	72.4444310933172	41.9694276265841
87.772018654169	87.7820664443102	87.6631305344075	87.3750948828716	86.8311222533049	85.8559162694848	84.0771696428329	80.5872361841686	72.4861599346749	42.0728111468091
87.7851160407523	87.7953475584416	87.6769324304088	87.3898018381346	86.8472300400221	85.874164607737	84.0988587996126	80.6151403691007	72.5282168818278	42.1769325280351
87.7983333036964	87.8087492250449	87.6908576375006	87.4046373837175	86.8634752062004	85.8925646840832	84.1207240901238	80.6432662547276	72.5705992530051	42.2817836297106
87.8116697120968	87.8222707034814	87.7049053861534	87.4196006984978	86.8798568484341	85.91111546462	84.14276426119	80.6716121727893	72.6133043761502	42.3873563484206
87.8251245377322	87.8359112558396	87.7190749096912	87.4346909644282	86.8963740667224	85.929815919312	84.1649780642163	80.7001764610674	72.6563295888948	42.4936426182764
87.8386970550598	87.8496701469302	87.7333654442866	87.4499073665305	86.9130259644618	85.948665021983	84.1873642551847	80.7289574633771	72.6996722385462	42.6006344112712
87.8523865412102	87.8635466442815	87.7477762289553	87.4652490928899	86.9298116484384	85.967661750307	84.2099215946497	80.7579535295594	72.7433296820844	42.7083237376089
87.8661043529861	87.8774512146131	87.7622148508715	87.4806184468719	86.9466248593744	85.9866862422536	84.2325077672923	80.7869813484467	72.7870254543323	42.8160294606939
87.8799382066758	87.8914724512956	87.7767727457708	87.4961120827916	86.963570711764	86.0058570543844	84.2552635150876	80.8162221557166	72.8310327386099	42.9244224775047
87.8938873852566	87.9056096278317	87.7914491589544	87.5117291955536	86.9806483200007	86.0251731731149	84.2781876092858	80.8456743163289	72.875348898381	43.0334949174952
87.9079511743661	87.9198620204276	87.8062433385523	87.5274689831088	86.9978568018461	86.0446335886913	84.30127882572	80.8753362003506	72.9199713113627	43.1432389416762
87.9221288622969	87.9342289079877	87.8211545355178	87.5433306464479	87.0151952784223	86.0642372951828	84.3245359447627	80.9052061832667	72.9648973681499	43.2536467451243
87.9364197399916	87.9487095721096	87.8361820036226	87.5593133895951	87.0326628742042	86.083983290472	84.3479577512969	80.935282646187	73.0101244712659	43.3647105587944
87.9508231010378	87.9633032970794	87.8513249994508	87.5754164196023	87.0502587170121	86.1038705762457	84.3715430346985	80.9655639759821	73.0556500345076	43.4764226508475
87.9653382416625	87.9780093698658	87.8665827823939	87.5916389465423	87.0679819380041	86.1238981579837	84.3952905888236	80.9960485653714	73.1014714824967	43.588775327636
87.979964460727	87.9928270801156	87.8819546146452	87.6079801835026	87.0858316716679	86.1440650449497	84.4191992120005	81.0267348129784	73.1475862503714	43.701760934451
87.9947010597221	88.0077557201483	87.897439761194	87.6244393465788	87.1038070558133	86.1643702501803	84.4432677070238	81.057621123363	73.1939917835771	43.8153718560986
88.0095473427622	88.0227945849507	87.9130374898203	87.6410156548687	87.1219072315643	86.1848127904754	84.4674948811493	81.0887059070406	73.2406855377249	43.929600517356
88.0245026165804	88.0379429721716	87.928747071089	87.6577083304648	87.1401313433506	86.2053916863881	84.4918795460901	81.1199875804904	73.2876649784968	44.04443938334
88.0395661905233	88.0532001821168	87.9445677783444	87.6745165984486	87.1584785389003	86.2261059622157	84.516420518012	81.1514645661576	73.3349275815841	44.1598809598124
88.0547373765451	88.0685655177434	87.960498887704	87.6914396868834	87.1769479692311	86.2469546459895	84.5411166175295	81.1831352924516	73.3824708326473	44.2759177934382
88.0700154892032	88.0840382846548	87.9765396780533	87.7084768268079	87.1955387886427	86.2679367694659	84.565966669701	81.2149981937418	73.4302922272926	44.3925424720086
88.0853998456517	88.0996177910947	87.9926894310395	87.7256272522294	87.2142501547082	86.2890513681175	84.590969504024	81.2470517103514	73.4783892710581	44.5097476246365
88.100889765637	88.1153033479423	88.0089474310662	87.7428902001167	87.2330812282662	86.3102974811235	84.6161239544295	81.2792942885506	73.5267594794073	44.6275259219304
88.1164032135773	88.1310120979538	88.0252281623664	87.7601752769151	87.2519337127762	86.3315642623162	84.6412984763753	81.3115566523011	73.5751481585631	44.7452577084215
88.1320213498926	88.1468260112774	88.0416162192185	87.7775718940744	87.2709048266528	86.3529613277175	84.6666231296677	81.3440061172552	73.6238069138141	44.8635533980312
88.1477435000247	88.1627444046126	88.0581108921424	87.7950792951738	87.289993738069	86.3744877249228	84.6920967586173	81.3766411446854	73.6727332714525	44.9824057799279
88.1635689919925	88.1787665972782	88.0747114743965	87.812696726734	87.3091996184395	86.396142505214	84.7177182119803	81.4094602010661	73.7219247711473	45.1018076796463
88.1794971563862	88.1948919112062	88.0914172619719	87.8304234382099	87.3285216424118	86.4179247235514	84.7434863429208	81.442461758314	73.7713789649013	45.2217519608734
88.1955273263621	88.2111196709368	88.1082275535863	87.8482586819834	87.3479589878589	86.4398334385645	84.7694000089861	81.475644293949	73.8210934163311	45.342231526717
88.2116588376365	88.2274492036121	88.1251416506775	87.8662017133571	87.3675108358703	86.4618677125419	84.7954580720893	81.5090062912004	73.8710657001692	45.4632393206114
88.2278910284806	88.243879838971	88.1421588573975	87.8842517905464	87.3871763707446	86.4840266114219	84.8216593984971	81.5425462390759	73.9212934019209	45.5847683269692
88.2442232397144	88.260410909343	88.1592784806065	87.9024081746731	87.4069547799806	86.5063092047819	84.8480028588206	81.5762626324059	73.9717741176278	45.706811571655
88.2606548147015	88.277041749643	88.1764998298663	87.9206701297577	87.4268452542693	86.5287145658287	84.8744873280087	81.6101539718696	74.0225054537062	45.8293621223322
88.2771850993432	88.2937716973649	88.1938222174342	87.9390369227127	87.4468469874856	86.5512417713888	84.9011116853421	81.6442187640104	74.0734850268354	45.9524130887203
88.2938134420727	88.3106000925763	88.2112449582567	87.9575078233349	87.4669591766798	86.5738899018979	84.9278748144274	81.6784555212428	74.1247104638828	46.0759576227871
88.3105391938495	88.3275262779126	88.2287673699633	87.9760821042988	87.4871810220691	86.5966580413922	84.9547756031925	81.7128627618548	74.1761794018523	46.1999889188939
88.327361708154	88.3445495985708	88.2463887728597	87.9947590411487	87.5075117270294	86.6195452774984	84.9818129438809	81.7474390100065	74.2278894878504	46.3245002139053
88.344280340981	88.361669402304	88.2641084899221	88.0135379122919	87.5279504980865	86.6425507014247	85.0089857330468	81.7821827957266	74.2798383790632	46.4494847872736
88.3612944508346	88.3788850394154	88.2819258467901	88.0324179989908	87.5484965449077	86.6656734079516	85.0362928715491	81.8170926549078	74.3320237427419	46.574935961102
88.3744840550746	88.392230280035	88.2957363605182	88.0470505576074	87.5644181204017	86.6835891558727	85.0574478030513	81.8441336710501	74.3724396472048	46.6720588467534
88.3876650490563	88.4055663974453	88.3095365823954	88.0616708844708	87.5803245467414	86.701485476825	85.078576848995	81.8711379811257	74.4127949426249	46.7689719964323
88.4008376355565	88.4188936685814	88.323326926079	88.0762795959955	87.5962167040368	86.7193635493069	85.0996814396704	81.8981069687043	74.4530894025214	46.8656804952699
88.4140018072422	88.4322120858331	88.3371073838647	88.0908766848667	87.6120945863353	86.7372233706034	85.1207615801455	81.9250406448637	74.4933231682259	46.9621848159485
88.427157556778	88.4455216416009	88.3508779480682	88.1054621438022	87.6279581877353	86.7550649381005	85.1418172752905	81.9519390243976	74.5334963655354	47.0584854529614
88.4403048768269	88.4588223282961	88.3646386110257	88.1200359655519	87.6438075023869	86.7728882492759	85.1628485299064	81.9788021249135	74.5736091083627	47.1545829169177
88.4534437600503	88.4721141383402	88.3783893650931	88.1345981428989	87.6596425244925	86.7906933016939	85.1838553488183	82.005629966149	74.613661501525	47.2504777301958
88.4665741991088	88.4853970641658	88.3921302026473	88.1491486686588	87.675463248307	86.8084800930023	85.2048377369412	82.0324225694545	74.6536536428731	47.3461704236245
88.4796961866625	88.4986710982163	88.4058611160852	88.1636875356804	87.6912696681381	86.8262486209317	85.2257956993259	82.0591799574028	74.6935856249168	47.4416615339494
88.4928097153714	88.511936232946	88.4195820978245	88.1782147368456	87.7070617783465	86.8439988832963	85.2467292411898	82.0859021534937	74.7334575360684	47.5369516019001
88.505914777896	88.5251924608201	88.4332931403034	88.1927302650699	87.722839573346	86.8617308779947	85.2676383679369	82.1125891819328	74.7732694615907	47.6320411707141
88.5190113668973	88.5384397743151	88.4469942359813	88.2072341133022	87.7386030476043	86.879444603012	85.2885230851699	82.1392410674641	74.8130214843228	47.7269307850119
88.5320994750375	88.5516781659184	88.4606853773381	88.2217262745253	87.7543521956424	86.8971400564217	85.3093833986963	82.1658578352452	74.8527136852347	47.8216209899389
88.5451790949806	88.564907628129	88.474366556875	88.2362067417557	87.7700870120357	86.9148172363875	85.3302193145306	82.1924395107542	74.8923461438507	47.9161123305115
88.5582502193919	88.5781281534572	88.4880377671142	88.2506755080443	87.7858074914139	86.9324761411658	85.3510308388933	82.2189861197194	74.9319189385741	48.0104053511206
88.5713128409393	88.5913397344248	88.5016990005991	88.2651325664759	87.8015136284616	86.950116769107	85.3718179782079	82.2454976880685	74.971432146935	48.1045005951528
88.5843669522931	88.6045423635651	88.5153502498947	88.2795779101703	87.8172054179188	86.9677391186576	85.3925807390975	82.2719742418897	75.0108858457805	48.1983986047048
88.5974125461266	88.6177360334234	88.5289915075874	88.2940115322814	87.832882854581	86.9853431883615	85.4133191283788	82.2984158074042	75.0502801114202	48.2920999203666
88.6104496151162	88.6309207365565	88.542622766285	88.3084334259983	87.8485459333001	87.0029289768614	85.4340331530576	82.3248224109458	75.0896150197377	48.3856050810585
88.6234781519417	88.6440964655337	88.5562440186175	88.3228435845451	87.8641946489846	87.0204964829	85.4547228203226	82.3511940789458	75.1288906462765	48.4789146239096
88.636498149287	88.6572632129358	88.5698552572363	88.337242001181	87.8798289966002	87.0380457053207	85.4753881375398	82.3775308379225	75.1681070663056	48.572029084167
88.64950959984	88.6704209713562	88.583456474815	88.3516286692009	87.8954489711701	87.0555766430683	85.4960291122471	82.4038327144737	75.2072643548703	48.6649489951296
88.662512496293	88.6835697334006	88.5970476640492	88.3660035819351	87.911054567776	87.0730892951898	85.5166457521485	82.4300997352716	75.2463625868312	48.7576748881
88.6755068313429	88.696709491687	88.6106288176568	88.38036673275	87.926645781558	87.0905836608347	85.5372380651095	82.4563319270589	75.2854018368944	48.850207292351
88.688492597692	88.7098402388462	88.6241999283782	88.394718115048	87.9422226077153	87.108059739255	85.5578060591513	82.4825293166466	75.3243821796346	48.9425467351022
88.7014697880473	88.7229619675216	88.637760988976	88.4090577222679	87.9577850415068	87.1255175298055	85.5783497424468	82.5086919309123	75.3633036895136	49.0346937415061
88.7144383951218	88.7360746703695	88.6513119922356	88.4233855478849	87.9733330782516	87.1429570319441	85.5988691233157	82.5348197967991	75.4021664408942	49.1266488346396
88.7273984116342	88.7491783400593	88.6648529309652	88.4377015854113	87.9888667133288	87.1603782452309	85.6193642102208	82.5609129413153	75.4409705080516	49.2184125355003
88.7403498303091	88.7622729692734	88.6783837979958	88.4520058283962	88.0043859421789	87.1777811693288	85.6398350117633	82.5869713915335	75.4797159651813	49.3099853630081
88.7532926438775	88.7753585507075	88.6919045861814	88.4662982704259	88.0198907603035	87.1951658040025	85.6602815366802	82.6129951745912	75.5184028864069	49.4013678340074
88.7662268450772	88.7884350770708	88.7054152883994	88.4805789051244	88.0353811632657	87.2125321491188	85.6807037938397	82.6389843176901	75.5570313457849	49.4925604632736
88.7791524266524	88.8015025410859	88.7189158975503	88.4948477261533	88.0508571466907	87.2298802046456	85.7011017922389	82.6649388480963	75.5956014173095	49.5835637635197
88.7920693813548	88.8145609354893	88.7324064065581	88.5091047272122	88.0663187062663	87.247209970652	85.7214755410003	82.6908587931404	75.634113174916	49.6743782454057
88.8049777019431	88.8276102530312	88.7458868083705	88.523349902039	88.0817658377426	87.264521447307	85.7418250493689	82.7167441802172	75.6725666924834	49.7650044175471
88.8178773811835	88.8406504864757	88.7593570959589	88.53758324441	88.0971985369329	87.2818146348797	85.7621503267098	82.7425950367858	75.7109620438373	49.8554427865262
88.8307684118503	88.8536816286013	88.7728172623186	88.5518047481401	88.1126167997134	87.2990895337384	85.7824513825054	82.7684113903696	75.7492993027515	49.9456938569022
88.8436507867255	88.8667036722004	88.7862673004691	88.5660144070832	88.1280206220242	87.3163461443497	85.8027282263533	82.7941932685559	75.7875785429497	50.0357581312227
88.8565244985993	88.8797166100802	88.7997072034539	88.5802122151324	88.1434099998686	87.3335844672783	85.8229808679638	82.8199406989962	75.825799838107	50.1256361100352
88.8693895402705	88.8927204350621	88.813136964341	88.5943981662201	88.158784929314	87.3508045031862	85.8432093171579	82.8456537094054	75.8639632618512	50.2153282918988
88.8822459045465	88.9057151399826	88.826556576223	88.6085722543185	88.1741454064918	87.3680062528316	85.8634135838654	82.8713323275619	75.9020688877635	50.304835173396
88.8950935842435	88.9187007176927	88.839966032217	88.6227344734395	88.1894914275978	87.3851897170691	85.8835936781227	82.8969765813075	75.9401167893798	50.3941572491445
88.9079325721869	88.9316771610586	88.8533653254651	88.636884817635	88.2048229888917	87.402354896848	85.9037496100713	82.9225864985466	75.9781070401913	50.4832950118095
88.9207628612113	88.9446444629616	88.8667544491344	88.6510232809974	88.2201400866981	87.4195017932123	85.9238813899559	82.9481621072462	76.0160397136452	50.5722489521151
88.9335844441609	88.9576026162985	88.8801333964172	88.6651498576594	88.235442717406	87.4366304072996	85.9439890281228	82.9737034354354	76.0539148831457	50.6610195588568
88.9463973138893	88.9705516139812	88.8935021605308	88.6792645417945	88.2507308774689	87.4537407403407	85.9640725350184	82.9992105112051	76.0917326220539	50.7496073189129
88.9592014632605	88.9834914489375	88.9068607347185	88.6933673276173	88.2660045634052	87.4708327936585	85.9841319211875	83.0246833627074	76.1294930036889	50.8380127172567
88.9719968851482	88.996422114111	88.920209112249	88.7074582093833	88.281263771798	87.4879065686677	86.0041671972721	83.0501220181556	76.1671961013283	50.926236236968
88.9847835724366	89.0093436024611	88.9335472864167	88.7215371813894	88.2965084992952	87.5049620668737	86.02417837401	83.075526505823	76.2048419882082	51.0142783592447
88.9975615180204	89.0222559069633	88.9468752505422	88.735604237974	88.3117387426097	87.5219992898722	86.0441654622333	83.1008968540431	76.242430737524	51.102139563415
89.0103307148049	89.0351590206093	88.9601929979722	88.7496593735173	88.3269544985189	87.5390182393484	86.0641284728673	83.1262330912091	76.2799624224306	51.1898203269479
89.0230911557064	89.0480529364073	88.9735005220797	88.7637025824413	88.3421557638653	87.5560189170762	86.0840674169291	83.1515352457729	76.3174371160429	51.2773211254655
89.0358428336522	89.0609376473821	88.9867978162641	88.7777338592102	88.3573425355561	87.5730013249176	86.1039823055267	83.1768033462452	76.3548548914358	51.3646424327537
89.0485857415809	89.0738131465749	89.0000848739516	88.7917531983303	88.3725148105632	87.5899654648219	86.1238731498577	83.2020374211945	76.3922158216449	51.4517847207738
89.0613198724427	89.0866794270442	89.013361688595	88.8057605943503	88.3876725859235	87.6069113388254	86.143739961208	83.2272374992471	76.4295199796666	51.5387484596734
89.0740452191993	89.0995364818652	89.0266282536744	88.8197560418618	88.4028158587382	87.6238389490501	86.1635827509511	83.2524036090864	76.466767438458	51.6255341177974
89.0867617748243	89.1123843041304	89.0398845626967	88.8337395354988	88.4179446261735	87.6407482977036	86.1834015305469	83.2775357794522	76.5039582709379	51.7121421616988
89.0994695323032	89.1252228869497	89.0531306091962	88.8477110699383	88.4330588854598	87.6576393870781	86.2031963115407	83.3026340391404	76.5410925499863	51.7985730561498
89.1121684846339	89.1380522234503	89.0663663867349	88.8616706399004	88.4481586338923	87.67451221955	86.2229671055621	83.3276984170026	76.5781703484449	51.8848272641522
89.1248586248267	89.1508723067773	89.0795918889021	88.8756182401484	88.4632438688303	87.6913667975788	86.2427139243244	83.3527289419454	76.6151917391172	51.970905246948
89.1375399459043	89.1636831300934	89.0928071093151	88.8895538654887	88.4783145876975	87.7082031237072	86.2624367796234	83.3777256429301	76.6521567947689	52.0568074640301
89.1502124409023	89.1764846865795	89.106012041619	88.9034775107714	88.4933707879818	87.7250212005597	86.2821356833365	83.4026885489719	76.6890655881276	52.1425343731523
89.1628761028691	89.1892769694344	89.1192066794871	88.9173891708902	88.5084124672349	87.7418210308425	86.301810647422	83.4276176891399	76.7259181918832	52.22808643034
89.1755309248664	89.2020599718754	89.1323910166211	88.9312888407823	88.5234396230729	87.7586026173428	86.3214616839182	83.452513092556	76.7627146786883	52.3134640899001
89.188176899969	89.2148336871382	89.1455650467509	88.9451765154289	88.5384522531752	87.7753659629279	86.3410888049425	83.4773747883951	76.7994551211577	52.3986678044312
89.2008140212654	89.227598108477	89.1587287636351	88.9590521898551	88.5534503552853	87.7921110705449	86.3606920226906	83.5022028058839	76.8361395918688	52.4836980248335
89.2134422818575	89.2403532291648	89.1718821610609	88.9729158591299	88.5684339272098	87.8088379432202	86.380271349436	83.5269971743011	76.8727681633618	52.5685552003187
89.2260616748612	89.2530990424937	89.1850252328447	88.9867675183666	88.583402966819	87.8255465840584	86.3998267975288	83.5517579229764	76.9093409081396	52.65323977842
89.2386721934063	89.2658355417747	89.1981579728315	89.0006071627227	88.5983574720463	87.8422369962424	86.4193583793951	83.5764850812903	76.945857898668	52.7377522050016
89.2512738306368	89.2785627203382	89.211280374896	89.0144347874	88.6132974408883	87.8589091830323	86.4388661075365	83.6011786786737	76.9823192073754	52.8220929242682
89.2638665797111	89.2912805715339	89.224392432942	89.0282503876448	88.6282228714043	87.8755631477652	86.4583499945291	83.6258387446072	77.0187249066533	52.9062623787748
89.276450433802	89.3039890887311	89.2374941409026	89.0420539587477	88.6431337617166	87.8921988938543	86.4778100530229	83.6504653086208	77.0550750688561	52.9902610094362
89.2890253860971	89.3166882653189	89.2505854927409	89.0558454960441	88.65803011001	87.9088164247888	86.4972462957412	83.6750584002932	77.0913697663011	53.0740892555357
89.3015914297988	89.3293780947061	89.2636664824495	89.0696249949139	88.6729119145316	87.9254157441329	86.5166587354798	83.699618049252	77.1276090712684	53.1577475547354
89.3141485581245	89.3420585703216	89.2767371040512	89.0833924507819	88.6877791735908	87.9419968555256	86.5360473851063	83.7241442851723	77.1637930560013	53.2412363430844
89.3266967643069	89.3547296856148	89.2897973515987	89.0971478591174	88.7026318855592	87.9585597626801	86.5554122575597	83.7486371377772	77.1999217927059	53.3245560550284
89.339236041594	89.367391434055	89.3028472191749	89.1108912154348	88.7174700488702	87.975104469383	86.5747533658493	83.7730966368365	77.2359953535511	53.4077071234187
89.3517663832493	89.3800438091322	89.3158867008931	89.1246225152933	88.7322936620188	87.9916309794944	86.5940707230549	83.7975228121671	77.272013810669	53.4906899795211
89.3642877825521	89.3926868043572	89.3289157908972	89.138341754297	88.7471027235618	88.0081392969468	86.6133643423252	83.8219156936318	77.3079772361542	53.5735050530245
89.3768002327975	89.4053204132614	89.3419344833614	89.1520489280951	88.7618972321169	88.0246294257448	86.6326342368778	83.8462753111394	77.3438857020645	53.65615277205
89.3893037272967	89.4179446293974	89.3549427724911	89.1657440323819	88.7766771863633	88.0411013699649	86.6518804199986	83.870601694644	77.3797392804201	53.7386335631596
89.401798259377	89.4305594463387	89.3679406525222	89.1794270628965	88.7914425850412	88.0575551337545	86.6711029050409	83.8948948741448	77.4155380432043	53.8209478513645
89.4142838223822	89.4431648576802	89.3809281177219	89.1930980154234	88.8061934269511	88.0739907213318	86.6903017054253	83.9191548796854	77.4512820623627	53.903096060134
89.4267604096725	89.4557608570383	89.3939051623883	89.2067568857922	88.8209297109545	88.0904081369853	86.7094768346385	83.9433817413537	77.4869714098039	53.9850786114037
89.439228014625	89.4683474380508	89.4068717808508	89.2204036698776	88.8356514359732	88.106807385073	86.7286283062335	83.967575489281	77.5226061573987	54.0668959255842
89.4516866306333	89.4809245943774	89.4198279674705	89.2340383635996	88.850358600989	88.1231884700226	86.7477561338283	83.9917361536424	77.5581863769805	54.148548421569
89.4641362511085	89.4934923196997	89.4327737166396	89.2476609629233	88.8650512050437	88.1395513963301	86.766860331106	84.0158637646554	77.5937121403451	54.2300365167433
89.4765768694785	89.5060506077212	89.4457090227823	89.2612714638593	88.8797292472391	88.1558961685604	86.7859409118139	84.0399583525802	77.6291835192505	54.3113606269917
89.4890084791887	89.5185994521677	89.4586338803541	89.2748698624631	88.8943927267363	88.1722227913459	86.8049978897631	84.0640199477191	77.6646005854171	54.3925211667067
89.501431073702	89.5311388467872	89.4715482838428	89.2884561548358	88.9090416427559	88.1885312693869	86.8240312788279	84.0880485804162	77.6999634105271	54.4735185487964
89.5138446464991	89.5436687853505	89.484452227768	89.3020303371237	88.9236759945776	88.2048216074505	86.8430410929456	84.1120442810567	77.735272066225	54.5543531846928
89.5262491910782	89.5561892616506	89.4973457066814	89.3155924055182	88.93829578154	88.2210938103706	86.8620273461154	84.1360070800667	77.770526624117	54.6350254843596
89.5386447009557	89.5687002695036	89.5102287151668	89.3291423562564	88.9529010030408	88.2373478830471	86.8809900523985	84.1599370079128	77.8057271557712	54.7155358562999
89.5510311696662	89.5812018027484	89.5231012478404	89.3426801856204	88.9674916585358	88.253583830446	86.8999292259174	84.183834095102	77.8408737327173	54.7958847075644
89.5634085907626	89.5936938552469	89.5359632993508	89.3562058899375	88.9820677475394	88.2698016575984	86.9188448808554	84.2076983721806	77.8759664264465	54.8760724437586
89.5757769578161	89.6061764208843	89.5488148643792	89.3697194655806	88.9966292696241	88.2860013696005	86.9377370314562	84.2315298697345	77.9110053084117	54.956099469051
89.5881362644166	89.6186494935692	89.5616559376392	89.3832209089677	89.0111762244204	88.3021829716132	86.9566056920231	84.2553286183885	77.9459904500268	55.0359661861802
89.6004865041728	89.6311130672335	89.5744865138773	89.3967102165622	89.0257086116163	88.3183464688614	86.9754508769191	84.279094648806	77.980921922667	55.115672996463
89.6128276707124	89.6435671358329	89.5873065878728	89.4101873848726	89.0402264309577	88.3344918666337	86.994272600566	84.3028279916885	78.0157997976686	55.1952202998012
89.6251597576819	89.6560116933468	89.6001161544377	89.4236524104527	89.0547296822474	88.3506191702823	87.0130708774443	84.3265286777754	78.0506241463287	55.2746084946899
89.6374827587474	89.6684467337784	89.6129152084173	89.4371052899016	89.0692183653456	88.3667283852223	87.0318457220922	84.3501967378436	78.0853950399053	55.353837978224
89.6497966675941	89.6808722511552	89.6257037446897	89.4505460198636	89.0836924801694	88.3828195169314	87.050597149106	84.373832202707	78.120112549617	55.4329091461059
89.6621014779268	89.6932882395286	89.6384817581664	89.4639745970281	89.0981520266924	88.3988925709495	87.0693251731388	84.3974351032161	78.1547767466427	55.5118223926531
89.6743971834702	89.7056946929744	89.6512492437921	89.4773910181298	89.112597004945	88.4149475528783	87.0880298089006	84.4210054702579	78.1893877021219	55.5905781108046
89.6866837779687	89.7180916055929	89.6640061965446	89.4907952799484	89.1270274150136	88.4309844683813	87.1067110711578	84.4445433347554	78.2239454871542	55.669176692129
89.6989612551864	89.730478971509	89.6767526114357	89.5041873793088	89.1414432570407	88.4470033231826	87.1253689747327	84.468048727667	78.2584501727991	55.7476185268306
89.711229608908	89.7428567848722	89.6894884835101	89.517567313081	89.155844531225	88.4630041230676	87.1440035345028	84.4915216799865	78.2929018300761	55.8259040037573
89.7234888329383	89.7552250398568	89.7022138078465	89.53093507818	89.1702312378206	88.4789868738816	87.1626147654012	84.5149622227425	78.3273005299645	55.9040335104071
89.7357389211025	89.7675837306622	89.7149285795571	89.5442906715657	89.184603377137	88.4949515815303	87.1812026824153	84.5383703869983	78.3616463434031	55.9820074329349
89.7479798672463	89.7799328515128	89.7276327937879	89.5576340902432	89.1989609495392	88.5108982519789	87.1997673005869	84.561746203851	78.3959393412899	56.0598261561601
89.7602116652363	89.7922723966583	89.7403264457186	89.5709653312625	89.2133039554472	88.5268268912519	87.2183086350117	84.5850897044318	78.4301795944824	56.1374900635725
89.7724343089599	89.8046023603736	89.7530095305631	89.5842843917184	89.2276323953357	88.5427375054328	87.2368267008388	84.6084009199054	78.4643671737972	56.2149995373398
89.7846477923255	89.8169227369591	89.7656820435689	89.5975912687505	89.2419462697342	88.5586301006639	87.2553215132704	84.6316798814693	78.4985021500095	56.2923549583139
89.7968521092626	89.8292335207409	89.7783439800178	89.6108859595435	89.2562455792267	88.5745046831455	87.2737930875616	84.654926620354	78.5325845938536	56.3695567060378
89.8090472537221	89.8415347060707	89.7909953352255	89.6241684613266	89.2705303244512	88.5903612591361	87.2922414390195	84.6781411678222	78.5666145760221	56.4466051587522
89.8212332196763	89.8538262873261	89.803636104542	89.637438771374	89.2848005061001	88.6061998349516	87.3106665830033	84.701323555169	78.6005921671661	56.5235006934019
89.8334100011191	89.8661082589104	89.8162662833515	89.6506968870041	89.2990561249194	88.6220204169655	87.3290685349239	84.7244738137207	78.634517437895	56.6002436856425
89.8455775920659	89.8783806152534	89.8288858670724	89.6639428055806	89.3132971817088	88.6378230116079	87.347447310243	84.7475919748354	78.6683904587761	56.676834509847
89.8577359865543	89.8906433508107	89.8414948511576	89.6771765245111	89.3275236773214	88.6536076253658	87.3658029244735	84.770678069902	78.7022113003346	56.753273539112
89.8698851786437	89.9028964600643	89.8540932310944	89.6903980412484	89.3417356126637	88.6693742647823	87.3841353931786	84.7937321303401	78.7359800330534	56.829561145264
89.8820251624156	89.9151399375227	89.8666810024042	89.7036073532891	89.3559329886951	88.6851229364567	87.4024447319714	84.8167541875997	78.769696727373	56.9056976988661
89.8941559319738	89.9273737777208	89.8792581606435	89.7168044581749	89.3701158064278	88.7008536470437	87.420730956515	84.8397442731606	78.8033614536911	56.9816835692241
89.9062774814445	89.9395979752202	89.8918247014029	89.7299893534912	89.3842840669269	88.7165664032536	87.4389940825217	84.8627024185325	78.8369742823627	57.0575191243928
89.9183898049766	89.9518125246092	89.9043806203077	89.7431620368684	89.3984377713096	88.7322612118517	87.4572341257529	84.8856286552543	78.8705352836997	57.133204731182
89.9304928967412	89.9640174205028	89.9169259130182	89.7563225059805	89.4125769207458	88.7479380796578	87.4754511020184	84.9085230148939	78.9040445279706	57.2087407551631
89.9425867509326	89.9762126575434	89.929460575229	89.7694707585462	89.426701516457	88.7635970135463	87.4936450271767	84.9313855290478	78.9375020854009	57.2841275606747
89.954671361768	89.9883982303999	89.9419846026697	89.782606792328	89.4408115597168	88.7792380204458	87.5118159171338	84.9542162293409	78.9709080261722	57.3593655108292
89.9667467234875	90.0005741337687	89.9544979911045	89.7957306051327	89.4549070518504	88.7948611073386	87.5299637878437	84.9770151474261	79.0042624204224	57.4344549675183
89.9788128303543	90.0127403623733	89.9670007363328	89.808842194811	89.4689879942346	88.8104662812604	87.5480886553074	84.9997823149838	79.0375653382455	57.5093962914195
89.9908696766553	90.0248969109649	89.9794928341885	89.8219415592575	89.4830543882973	88.8260535493002	87.5661905355729	85.0225177637219	79.0708168496914	57.5841898420018
90.0029172567002	90.0370437743216	89.9919742805408	89.8350286964109	89.4971062355176	88.8416229186001	87.5842694447348	85.0452215253752	79.1040170247657	57.6588359775315
90.0149555648229	90.0491809472496	90.0044450712934	89.8481036042534	89.5111435374254	88.8571743963544	87.6023253989339	85.0678936317052	79.1371659334292	57.7333350550783
90.0269845953807	90.0613084245825	90.0169052023856	89.8611662808113	89.5251662956013	88.8727079898102	87.6203584143569	85.0905341144999	79.1702636455984	57.807687430521
90.0390043427545	90.0734262011816	90.0293546697912	89.8742167241543	89.5391745116766	88.8882237062662	87.6383685072363	85.1131430055731	79.2033102311446	57.8818934585533
90.0510148013494	90.0855342719362	90.0417934695194	89.8872549323959	89.5531681873326	88.9037215530732	87.6563556938494	85.1357203367644	79.2363057598943	57.9559534926895
90.0630159655945	90.0976326317636	90.0542215976145	89.900280903693	89.567147324301	88.9192015376333	87.6743199905188	85.1582661399389	79.2692503016284	58.0298678852706
90.075007829943	90.1097212756089	90.0666390501557	89.9132946362461	89.5811119243633	88.9346636673996	87.6922614136116	85.1807804469865	79.3021439260827	58.1036369874692
90.0869903888724	90.1218001984456	90.0790458232576	89.9262961282992	89.5950619893508	88.9501079498765	87.7101799795392	85.2032632898221	79.3349867029471	58.1772611492958
90.0989636368846	90.1338693952752	90.09144191307	89.9392853781393	89.6089975211443	88.9655343926187	87.7280757047569	85.225714700385	79.3677787018658	58.2507407196043
90.110927568506	90.1459288611276	90.1038273157777	89.952262384097	89.622918521674	88.9809430032312	87.7459486057636	85.2481347106385	79.4005199924368	58.3240760460971
90.1228821782877	90.1579785910611	90.1162020276011	89.9652271445459	89.6368249929192	88.9963337893694	87.7637986991016	85.2705233525698	79.4332106442123	58.3972674753312
90.1348274608053	90.1700185801625	90.1285660447955	89.9781796579029	89.6507169369084	89.0117067587381	87.7816260013562	85.2928806581895	79.4658507266975	58.4703153527233
90.1467634106596	90.1820488235472	90.1409193636519	89.9911199226278	89.6645943557187	89.0270619190918	87.7994305291555	85.3152066595315	79.4984403093515	58.5432200225554
90.1586900224761	90.1940693163592	90.1532619804962	90.0040479372233	89.678457251476	89.0423992782344	87.8172122991696	85.3375013886525	79.5309794615865	58.6159818279802
90.1706072909055	90.2060800537711	90.1655938916899	90.0169637002353	89.6923056263545	89.0577188440183	87.8349713281112	85.3597648776317	79.5634682527675	58.6886011110265
90.1825152106237	90.2180810309845	90.1779150936299	90.0298672102521	89.7061394825767	89.073020624345	87.8527076327344	85.3819971585707	79.5959067522126	58.7610782126042
90.1944137763317	90.2300722432299	90.1902255827484	90.0427584659051	89.7199588224131	89.0883046271644	87.8704212298349	85.4041982635929	79.6282950291924	58.8334134725101
90.2063029827561	90.2420536857667	90.2025253555128	90.0556374658682	89.7337636481823	89.1035708604745	87.8881121362495	85.4263682248435	79.6606331529301	58.905607229433
90.218182824649	90.2540253538833	90.2148144084263	90.068504208858	89.7475539622504	89.118819332321	87.905780368856	85.4485070744888	79.6929211926009	58.9776598209588
90.230053296788	90.2659872428972	90.2270927380273	90.0813586936334	89.761329767031	89.1340500507977	87.9234259445725	85.4706148447163	79.7251592173325	59.0495715835757
90.2419143939764	90.2779393481553	90.2393603408895	90.0942009189959	89.7750910649853	89.1492630240454	87.9410488803577	85.4926915677342	79.7573472962041	59.1213428526794
90.2537661110434	90.2898816650337	90.2516172136224	90.1070308837894	89.7888378586214	89.1644582602522	87.95864919321	85.5147372757711	79.7894854982468	59.1929739625784
90.2656084428441	90.3018141889376	90.2638633528707	90.1198485868998	89.8025701504945	89.1796357676531	87.9762269001675	85.5367520010757	79.8215738924431	59.2644652464988
90.2774413842596	90.3137369153019	90.2760987553147	90.1326540272556	89.8162879432066	89.1947955545295	87.9937820183078	85.5587357759167	79.8536125477269	59.3358170365896
90.2892649301971	90.325649839591	90.28832341767	90.1454472038269	89.8299912394062	89.2099376292095	88.0113145647475	85.580688632582	79.8856015329833	59.4070296639276
90.30107907559	90.3375529572985	90.300537336688	90.1582281156263	89.8436800417885	89.2250620000671	88.0288245566421	85.6026106033791	79.9175409170481	59.4781034585225
90.3128838153979	90.3494462639479	90.3127405091553	90.1709967617082	89.8573543530948	89.2401686755221	88.0463120111854	85.6245017206342	79.9494307687083	59.5490387493215
90.3246791446071	90.3613297550925	90.3249329318941	90.1837531411686	89.8710141761124	89.2552576640401	88.0637769456096	85.6463620166921	79.9812711567009	59.619835864215
90.3364650582301	90.373203426315	90.3371146017622	90.1964972531456	89.8846595136747	89.270328974132	88.0812193771848	85.6681915239162	80.0130621497138	59.6904951300405
90.348241551306	90.3850672732281	90.3492855156527	90.2092290968189	89.8982903686608	89.2853826143538	88.0986393232186	85.6899902746878	80.0448038163849	59.7610168725884
90.3600086189009	90.3969212914745	90.3614456704945	90.2219486714098	89.9119067439953	89.3004185933062	88.1160368010563	85.7117583014059	80.076496225302	59.8314014166061
90.3717662561072	90.4087654767266	90.3735950632516	90.2346559761811	89.9255086426482	89.3154369196349	88.13341182808	85.7334956364871	80.1081394450029	59.9016490858033
90.3835144580445	90.4205998246869	90.385733690924	90.2473510104371	89.9390960676348	89.3304376020297	88.1507644217086	85.7552023123652	80.139733543975	59.9717602028565
90.3952532198592	90.4324243310879	90.3978615505469	90.2600337735234	89.9526690220153	89.3454206492246	88.1680945993977	85.7768783614907	80.1712785906551	60.0417350894138
90.4069825367247	90.4442389916923	90.4099786391909	90.2727042648269	89.9662275088949	89.3603860699976	88.1854023786391	85.7985238163311	80.2027746534295	60.1115740660999
90.4187024038417	90.4560438022929	90.4220849539625	90.2853624837756	89.9797715314234	89.3753338731702	88.2026877769605	85.8201387093698	80.2342218006333	60.1812774525202
90.4304128164379	90.4678387587128	90.4341804920033	90.2980084298389	89.9933010927952	89.3902640676075	88.2199508119255	85.8417230731065	80.2656201005507	60.2508455672659
90.4421137697683	90.4796238568051	90.4462652504906	90.3106421025268	90.006816196249	89.4051766622176	88.2371915011327	85.8632769400567	80.2969696214146	60.3202787279185
90.4538052591153	90.4913990924536	90.4583392266372	90.3232635013906	90.0203168450677	89.4200716659519	88.2544098622164	85.8848003427511	80.3282704314064	60.3895772510544
90.4654872797889	90.5031644615723	90.4704024176913	90.3358726260221	90.0338030425783	89.434949087804	88.2716059128454	85.906293313736	80.3595225986559	60.4587414522495
90.4771598271264	90.5149199601056	90.4824548209367	90.3484694760542	90.0472747921515	89.4498089368105	88.2887796707234	85.9277558855723	80.3907261912413	60.5277716460835
90.4888228964927	90.5266655840284	90.4944964336924	90.3610540511601	90.0607320972017	89.4646512220499	88.3059311535881	85.9491880908356	80.4218812771884	60.5966681461449
90.5004764832807	90.5384013293461	90.5065272533132	90.3736263510539	90.0741749611869	89.4794759526429	88.3230603792116	85.9705899621161	80.4529879244711	60.6654312650348
90.5121205829105	90.5501271920947	90.5185472771891	90.3861863754901	90.0876033876083	89.494283137752	88.3401673653998	85.9919615320178	80.484046201011	60.7340613143722
90.5237551908306	90.561843168341	90.5305565027457	90.3987341242635	90.1010173800103	89.5090727865812	88.3572521299918	86.0133028331587	80.5150561746771	60.8025586047974
90.5353803025171	90.573549254182	90.5425549274438	90.4112695972092	90.1144169419805	89.5238449083759	88.3743146908606	86.0346138981702	80.5460179132857	60.8709234459775
90.5469959134741	90.5852454457459	90.5545425487798	90.4237927942027	90.1278020771491	89.5385995124225	88.3913550659116	86.055894759697	80.5769314846003	60.9391561466096
90.5586020192337	90.5969317391914	90.5665193642855	90.4363037151596	90.141172789189	89.5533366080483	88.4083732730835	86.077145450397	80.6077969563311	61.0072570144264
90.5701986153564	90.6086081307079	90.578485371528	90.4488023600353	90.1545290818157	89.5680562046215	88.4253693303472	86.0983660029406	80.6386143961355	61.0752263561994
90.5817856974305	90.6202746165159	90.5904405681098	90.4612887288254	90.167870958787	89.5827583115506	88.4423432557058	86.1195564500107	80.6693838716171	61.1430644777437
90.5933632610728	90.6319311928665	90.6023849516687	90.4737628215653	90.1811984239027	89.5974429382841	88.4592950671948	86.1407168243024	80.7001054503263	61.2107716839225
90.6049313019284	90.6435778560419	90.614318519878	90.4862246383302	90.194511481005	89.6121100943108	88.476224782881	86.1618471585228	80.7307791997595	61.2783482786507
90.6164898156707	90.6552146023551	90.626241270446	90.498674179235	90.2078101339776	89.6267597891591	88.4931324208629	86.1829474853906	80.7614051873594	61.3457945648997
90.6280387980017	90.6668414281502	90.6381532011166	90.511111444434	90.221094386746	89.6413920323971	88.5100179992703	86.2040178376359	80.7919834805143	61.4131108447011
90.6395782446517	90.6784583298023	90.6500543096688	90.5235364341213	90.2343642432772	89.6560068336322	88.5268815362637	86.2250582479998	80.8225141465587	61.4802974191514
90.6511081513797	90.6900653037174	90.6619445939171	90.5359491485302	90.2476197075796	89.6706042025108	88.5437230500348	86.2460687492345	80.8529972527723	61.5473545884155
90.6626285139734	90.7016623463328	90.6738240517108	90.5483495879334	90.2608607837028	89.6851841487184	88.5605425588053	86.2670493741027	80.8834328663805	61.6142826517313
90.6741393282491	90.7132494541167	90.6856926809348	90.5607377526427	90.2740874757374	89.699746681979	88.5773400808274	86.2880001553773	80.9138210545538	61.6810819074136
90.6856405900519	90.7248266235686	90.6975504795091	90.5731136430094	90.2872997878147	89.7142918120551	88.5941156343833	86.3089211258416	80.9441618844077	61.7477526528581
90.6971322952557	90.7363938512191	90.7093974453888	90.5854772594234	90.3004977241071	89.7288195487477	88.6108692377849	86.3298123182883	80.974455423003	61.8142951845455
90.7086144397633	90.74795113363	90.7212335765641	90.5978286023138	90.3136812888273	89.7433299018955	88.6276009093734	86.3506737655201	81.0047017373447	61.8807097980456
90.7200870195064	90.7594984673944	90.7330588710605	90.6101676721485	90.3268504862284	89.7578228813753	88.6443106675196	86.3715055003488	81.034900894383	61.9469967880211
90.7315500304457	90.7710358491365	90.7448733269385	90.6224944694342	90.3400053206038	89.7722984971015	88.660998530623	86.3923075555952	81.0650529610121	62.0131564482317
90.743003468571	90.7825632755119	90.7566769422936	90.6348089947162	90.3531457962868	89.7867567590258	88.6776645171121	86.413079964089	81.0951580040705	62.0791890715377
90.7544473299009	90.7940807432077	90.7684697152564	90.6471112485786	90.366271917651	89.8011976771372	88.6943086454438	86.4338227586685	81.1252160903412	62.1450949499047
90.7658816104836	90.8055882489418	90.7802516439926	90.6594012316436	90.3793836891094	89.8156212614617	88.7109309341033	86.4545359721801	81.1552272865507	62.2108743744064
90.7773063063962	90.817085789464	90.7920227267027	90.6716789445722	90.3924811151147	89.8300275220619	88.7275314016039	86.4752196374785	81.1851916593695	62.2765276352295
90.788721413745	90.8285733615552	90.8037829616223	90.6839443880635	90.4055642001591	89.8444164690374	88.7441100664865	86.4958737874261	81.2151092754118	62.3420550216767
90.8001269286657	90.8400509620277	90.8155323470219	90.6961975628547	90.4186329487741	89.8587881125237	88.7606669473199	86.5164984548926	81.2449802012352	62.4074568221713
90.8115228473234	90.8515185877254	90.8272708812069	90.7084384697215	90.4316873655303	89.8731424626929	88.7772020627	86.5370936727555	81.2748045033405	62.4727333242601
90.8229091659124	90.8629762355233	90.8389985625177	90.7206671094772	90.4447274550373	89.8874795297528	88.7937154312499	86.5576594738989	81.3045822481719	62.5378848146182
90.8342858806566	90.8744239023282	90.8507153893292	90.7328834829733	90.4577532219433	89.901799323947	88.8102070716195	86.5781958912139	81.3343135021165	62.6029115790516
90.8456529878092	90.8858615850781	90.8624213600513	90.7450875910991	90.4707646709356	89.9161018555548	88.8266770024853	86.5987029575983	81.3639983315044	62.6678139025022
90.8570104836531	90.8972892807428	90.8741164731289	90.7572794347814	90.4837618067397	89.9303871348907	88.8431252425504	86.619180705956	81.3936368026081	62.7325920690502
90.8683583645006	90.9087069863232	90.8858007270413	90.7694590149851	90.4967446341195	89.9446551723046	88.8595518105438	86.639629169197	81.423228981643	62.7972463619189
90.8796966266936	90.9201146988521	90.8974741203025	90.7816263327122	90.5097131578773	89.9589059781811	88.8759567252206	86.6600483802374	81.4527749347668	62.8617770634777
90.8910252666037	90.9315124153937	90.9091366514616	90.7937813890024	90.5226673828531	89.9731395629396	88.8923400053616	86.6804383719985	81.4822747280794	62.9261844552459
90.9023442806323	90.9429001330435	90.9207883191018	90.8059241849329	90.5356073139251	89.9873559370343	88.9087016697731	86.7007991774073	81.5117284276228	62.9904688178963
90.9136536652103	90.954277848929	90.9324291218413	90.8180547216178	90.5485329560091	90.0015551109536	88.9250417372866	86.7211308293957	81.5411360993811	63.054630431259
90.9249534167984	90.9656455602088	90.9440590583327	90.8301730002086	90.5614443140587	90.01573709522	88.9413602267585	86.7414333609007	81.5704978092802	63.1186695743247
90.9362435318871	90.9770032640736	90.955678127263	90.8422790218939	90.5743413930646	90.0299019003901	88.9576571570703	86.7617068048638	81.5998136231876	63.1825865252485
90.9475240069967	90.9883509577451	90.9672863273541	90.8543727878993	90.5872241980552	90.0440495370542	88.9739325471278	86.7819511942309	81.6290836069123	63.2463815613531
90.9587948386775	90.9996886384771	90.9788836573619	90.8664542994871	90.6000927340956	90.0581800158363	88.9901864158614	86.8021665619522	81.6583078262048	63.3100549591326
90.9700560235095	91.0110163035548	90.9904701160769	90.8785235579567	90.6129470062883	90.0722933473937	89.0064187822254	86.8223529409818	81.6874863467569	63.373606994256
90.9813075581026	91.0223339502949	91.0020457023242	90.8905805646439	90.6257870197724	90.0863895424169	89.0226296651982	86.8425103642775	81.7166192342013	63.4370379415704
90.9925494390969	91.0336415760459	91.0136104149629	90.9026253209214	90.6386127797237	90.1004686116294	89.0388190837817	86.8626388648005	81.7457065541119	63.500348075105
91.0037816631622	91.0449391781878	91.0251642528865	90.9146578281981	90.6514242913548	90.1145305657876	89.0549870570015	86.8827384755156	81.7747483720033	63.5635376680737
91.0150042269984	91.0562267541323	91.036707215023	90.9266780879196	90.6642215599144	90.1285754156805	89.0711336039062	86.9028092293902	81.8037447533308	63.6266069928794
91.0262171273356	91.0675043013227	91.0482393003342	90.9386861015676	90.6770045906874	90.1426031721293	89.0872587435676	86.9228511593948	81.8326957634902	63.6895563211166
91.0374203609337	91.0787718172339	91.0597605078165	90.9506818706602	90.6897733889952	90.1566138459878	89.1033624950803	86.9428642985023	81.8616014678179	63.7523859235754
91.0486139245829	91.0900292993726	91.0712708365002	90.9626653967515	90.7025279601948	90.1706074481417	89.1194448775615	86.9628486796882	81.8904619315905	63.8150960702446
91.0597978151033	91.1012767452769	91.0827702854496	90.9746366814318	90.7152683096791	90.1845839895085	89.1355059101506	86.9828043359298	81.9192772200246	63.8776870303148
91.0709720293454	91.1125141525166	91.0942588537634	90.9865957263271	90.7279944428767	90.1985434810374	89.1515456120095	87.0027313002067	81.948047398277	63.9401590721824
91.0821365641896	91.1237415186933	91.105736540574	90.9985425330995	90.7407063652517	90.2124859337092	89.1675640023218	87.0226296054998	81.9767725314444	64.0025124634519
91.0932914165468	91.13495884144	91.1172033450478	91.0104771034466	90.7534040823034	90.2264113585359	89.183561100293	87.0424992847916	82.0054526845631	64.0647474709401
91.1044365833578	91.1461661184216	91.1286592663854	91.0223994391019	90.7660875995666	90.2403197665607	89.1995369251499	87.0623403710661	82.0340879226091	64.1268643606789
91.1155720615937	91.1573633473343	91.1401043038208	91.0343095418343	90.7787569226111	90.2542111688576	89.2154914961409	87.082152897308	82.062678310498	64.1888633979186
91.1266978482561	91.1685505259062	91.1515384566224	91.0462074134482	90.7914120570414	90.2680855765316	89.2314248325353	87.1019368965029	82.0912239130847	64.2507448471311
91.1378139403764	91.179727651897	91.1629617240919	91.0580930557833	90.804053008497	90.2819430007179	89.2473369536235	87.121692401637	82.1197247951633	64.3125089720133
91.1489203350168	91.1908947230977	91.174374105565	91.0699664707147	90.816679782652	90.2957834525824	89.2632278787164	87.1414194456971	82.1481810214669	64.3741560354899
91.1600170292694	91.2020517373314	91.1857756004111	91.0818276601526	90.829292385215	90.3096069433212	89.2790976271455	87.1611180616697	82.1765926566679	64.435686299717
91.1711040202569	91.2131986924525	91.1971662080331	91.0936766260422	90.8418908219289	90.3234134841601	89.2949462182626	87.1807882825416	82.2049597653773	64.497100026085
91.182181305132	91.224335586347	91.2085459278675	91.1055133703639	90.8544750985709	90.3372030863551	89.3107736714394	87.2004301412994	82.233282412145	64.5583974752217
91.1932488810782	91.2354624169326	91.2199147593846	91.1173378951328	90.8670452209522	90.3509757611916	89.3265800060677	87.2200436709289	82.2615606614594	64.6195789069957
91.204306745309	91.2465791821586	91.231272702088	91.1291502023987	90.8796011949179	90.3647315199848	89.3423652415589	87.2396289044155	82.2897945777475	64.680644580519
91.2153548950684	91.2576858800057	91.2426197555148	91.1409502942465	90.8921430263469	90.3784703740788	89.3581293973436	87.2591858747435	82.3179842253747	64.7415947541506
91.2263933276308	91.2687825084864	91.2539559192356	91.1527381727951	90.9046707211518	90.3921923348471	89.3738724928721	87.2787146148964	82.3461296686446	64.8024296854993
91.237422040301	91.2798690656445	91.265281192854	91.1645138401985	90.9171842852786	90.4058974136921	89.3895945476134	87.298215157856	82.3742309717989	64.8631496314266
91.2484410304142	91.2909455495555	91.2765955760075	91.1762772986447	90.9296837247067	90.4195856220448	89.4052955810556	87.3176875366029	82.4022881990175	64.9237548480502
91.259450295336	91.3020119583265	91.2878990683664	91.1880285503561	90.9421690454488	90.4332569713651	89.4209756127053	87.3371317841158	82.430301414418	64.9842455907464
91.2704498324624	91.313068290096	91.2991916696343	91.1997675975894	90.9546402535506	90.446911473141	89.4366346620876	87.3565479333716	82.4582706820559	65.0446221141537
91.2814396392199	91.3241145430339	91.3104733795481	91.2114944426354	90.9670973550905	90.460549138889	89.4522727487459	87.3759360173449	82.4861960659244	65.1048846721751
91.2924197130655	91.3351507153419	91.3217441978777	91.2232090878188	90.9795403561802	90.4741699801534	89.4678898922416	87.3952960690082	82.5140776299544	65.165033517982
91.3033900514865	91.3461768052529	91.3330041244261	91.2349115354982	90.9919692629636	90.4877740085067	89.4834861121541	87.4146281213313	82.541915438014	65.225068904016
91.3143506520008	91.3571928110314	91.3442531590293	91.2466017880664	91.0043840816173	90.5013612355488	89.4990614280802	87.4339322072814	82.5697095539088	65.2849910819928
91.3253015121566	91.3681987309732	91.3554913015562	91.2582798479494	91.0167848183504	90.5149316729075	89.5146158596345	87.4532083598226	82.5974600413816	65.3448003029046
91.3362426295327	91.3791945634059	91.3667185519085	91.2699457176071	91.0291714794039	90.5284853322376	89.5301494264487	87.472456611916	82.6251669641124	65.4044968170232
91.3471740017384	91.390180306688	91.3779349100212	91.2815993995331	91.0415440710512	90.5420222252214	89.5456621481716	87.4916769965192	82.6528303857181	65.4640808739026
91.3580956264133	91.4011559592097	91.3891403758614	91.293240896254	91.0539025995975	90.555542363568	89.5611540444689	87.5108695465867	82.6804503697526	65.5235527223822
91.3690075012276	91.4121215193926	91.4003349494296	91.3048702103301	91.06624707138	90.5690457590135	89.5766251350231	87.5300342950688	82.7080269797068	65.5829126105896
91.379909623882	91.4230769856895	91.4115186307586	91.3164873443549	91.0785774927674	90.5825324233208	89.592075439533	87.5491712749121	82.7355602790078	65.6421607859432
91.3908019921077	91.4340223565847	91.4226914199139	91.3280923009549	91.0908938701599	90.596002368279	89.607504977714	87.5682805190591	82.7630503310199	65.7012974951552
91.401684603666	91.4449576305937	91.4338533169936	91.3396850827898	91.1031962099894	90.6094556057038	89.6229137692974	87.5873620604481	82.7904971990435	65.7603229842343
91.4125574563493	91.4558828062634	91.4450043221283	91.3512656925521	91.1154845187188	90.6228921474371	89.6383018340306	87.6064159320126	82.8179009463155	65.8192374984888
91.42342054798	91.4667978821718	91.4561444354812	91.3628341329674	91.1277588028423	90.6363120053466	89.6536691916767	87.6254421666818	82.8452616360092	65.8780412825288
91.4342738764111	91.4777028569284	91.4672736572478	91.3743904067937	91.140019068885	90.6497151913262	89.6690158620143	87.6444407973798	82.872579331234	65.9367345802693
91.4451174395261	91.4885977291737	91.4783919876558	91.385934516822	91.1522653234029	90.663101717295	89.6843418648375	87.6634118570256	82.8998540950353	65.9953176349332
91.455951235239	91.4994824975796	91.4894994269655	91.3974664658758	91.1644975729827	90.6764715951982	89.6996472199556	87.6823553785332	82.9270859903949	66.0537906890535
91.4667752614942	91.5103571608491	91.5005959754692	91.4089862568108	91.1767158242419	90.6898248370058	89.7149319471928	87.701271394811	82.95427508023	66.1121539844762
91.4775895162664	91.5212217177163	91.5116816334915	91.4204938925155	91.1889200838281	90.7031614547133	89.7301960663883	87.7201599387618	82.9814214273939	66.1704077623631
91.4883939975611	91.5320761669467	91.5227564013891	91.4319893759104	91.2011103584195	90.7164814603412	89.7454395973957	87.7390210432826	83.0085250946757	66.2285522631947
91.499188703414	91.5429205073364	91.5338202795507	91.4434727099482	91.2132866547245	90.7297848659348	89.7606625600834	87.7578547412644	83.0355861447998	66.2865877267721
91.5099736318912	91.5537547377132	91.5448732683973	91.4549438976138	91.2254489794815	90.7430716835642	89.7758649743337	87.7766610655922	83.0626046404265	66.3445143922205
91.5207487810893	91.5645788569355	91.5559153683814	91.466402941924	91.2375973394587	90.7563419253238	89.7910468600434	87.7954400491444	83.0895806441512	66.4023324979914
91.5315141491354	91.575392863893	91.5669465799876	91.4778498459275	91.2497317414542	90.7695956033327	89.806208237123	87.814191724793	83.1165142185049	66.4600422818653
91.5422697341869	91.5861967575063	91.5779669037326	91.4892846127047	91.2618521922959	90.7828327297339	89.8213491254967	87.8329161254033	83.1434054259538	66.5176439809541
91.5530155344316	91.596990536727	91.5889763401644	91.500707245368	91.273958698841	90.7960533166947	89.8364695451023	87.8516132838338	83.1702543288991	66.5751378317044
91.5637515480877	91.6077742005375	91.5999748898631	91.5121177470611	91.2860512679763	90.8092573764062	89.8515695158912	87.8702832329357	83.1970609896774	66.6325240698991
91.5744777734038	91.6185477479515	91.6109625534402	91.5235161209593	91.2981299066176	90.8224449210831	89.8666490578277	87.8889260055532	83.2238254705599	66.6898029306607
91.5851942086588	91.6293111780132	91.6219393315389	91.5349023702693	91.3101946217101	90.8356159629638	89.8817081908893	87.907541634523	83.2505478337532	66.7469746484536
91.5959008521621	91.6400644897979	91.632905224834	91.5462764982292	91.322245420228	90.8487705143103	89.8967469350664	87.9261301526742	83.2772281413982	66.8040394570867
91.6065977022532	91.6508076824115	91.6438602340317	91.5576385081083	91.3342823091741	90.8619085874075	89.911765310362	87.944691592828	83.3038664555709	66.8609975897157
91.6172847573021	91.6615407549911	91.6548043598697	91.5689884032067	91.3463052955802	90.8750301945636	89.9267633367917	87.9632259877979	83.3304628382818	66.9178492788459
91.6279620157091	91.6722637067041	91.6657376031168	91.5803261868561	91.3583143865066	90.8881353481097	89.9417410343833	87.9817333703893	83.357017351476	66.9745947563348
91.6386294759048	91.682976536749	91.6766599645734	91.5916518624186	91.3703095890422	90.9012240603997	89.9566984231768	88.000213773399	83.3835300570332	67.0312342533941
91.6492871363499	91.6936792443549	91.6875714450709	91.6029654332874	91.382290910304	90.9142963438101	89.9716355232243	88.0186672296156	83.4100010167673	67.0877680005925
91.6599349955356	91.7043718287814	91.6984720454721	91.6142669028864	91.3942583574375	90.92735221074	89.9865523545897	88.0370937718192	83.4364302924267	67.1441962278583
91.6705730519832	91.7150542893191	91.7093617666707	91.6255562746701	91.4062119376162	90.9403916736106	90.0014489373484	88.0554934327808	83.4628179456941	67.2005191644814
91.6812013042442	91.7257266252888	91.7202406095915	91.6368335521235	91.4181516580415	90.9534147448655	90.0163252915875	88.0738662452626	83.4891640381862	67.2567370391163
91.6918197509005	91.7363888360421	91.7311085751904	91.6480987387622	91.4300775259426	90.9664214369702	90.0311814374053	88.0922122420178	83.5154686314539	67.3128500797841
91.7024283905641	91.7470409209612	91.7419656644541	91.6593518381319	91.4419895485766	90.9794117624119	90.0460173949112	88.11053145579	83.5417317869821	67.3688585138749
91.713027221877	91.7576828794586	91.7528118784001	91.6705928538088	91.453887733228	90.9923857336997	90.0608331842258	88.1288239193137	83.5679535661897	67.4247625681506
91.7236162435116	91.7683147109775	91.7636472180769	91.681821789399	91.4657720872088	91.0053433633644	90.0756288254801	88.1470896653136	83.5941340304294	67.4805624687468
91.7341954541702	91.7789364149913	91.7744716845634	91.693038648539	91.4776426178585	91.0182846639579	90.0904043388161	88.1653287265045	83.6202732409877	67.5362584411754
91.7447648525855	91.7895479910039	91.7852852789696	91.7042434348949	91.4894993325434	91.0312096480534	90.1051597443863	88.1835411355916	83.6463712590851	67.5918507103272
91.7553244375201	91.8001494385496	91.7960880024357	91.7154361521629	91.5013422386573	91.0441183282454	90.1198950623533	88.2017269252697	83.6724281458753	67.6473395004736
91.7658742077665	91.810740757193	91.8068798561327	91.7266168040689	91.5131713436206	91.0570107171492	90.1346103128899	88.2198861282235	83.6984439624459	67.7027250352697
91.7764141621477	91.8213219465289	91.817660841262	91.7377853943684	91.5249866548808	91.0698868274009	90.149305516179	88.2380187771271	83.724418769818	67.7580075377561
91.7869442995163	91.8318930061825	91.8284309590552	91.7489419268466	91.5367881799119	91.0827466716572	90.1639806924132	88.2561249046442	83.7503526289461	67.8131872303614
91.7974646187551	91.842453935809	91.8391902107747	91.7600864053182	91.5485759262146	91.0955902625956	90.1786358617949	88.2742045434278	83.776245600718	67.8682643349044
91.8079751187768	91.8530047350939	91.8499385977127	91.7712188336271	91.5603499013159	91.1084176129135	90.193271044536	88.2922577261199	83.8020977459551	67.9232390725964
91.8184757985241	91.8635454037529	91.8606761211919	91.7823392156467	91.5721101127692	91.1212287353288	90.2078862608576	88.3102844853513	83.8279091254116	67.9781116640438
91.8289666569697	91.8740759415316	91.8714027825651	91.7934475552794	91.5838565681541	91.1340236425796	90.2224815309901	88.3282848537419	83.8536797997754	68.0328823292499
91.8394476931159	91.8845963482058	91.8821185832151	91.8045438564569	91.5955892750763	91.1468023474235	90.2370568751728	88.3462588639001	83.8794098296671	68.0875512876172
91.8499189059953	91.8951066235813	91.8928235245548	91.8156281231397	91.6073082411673	91.1595648626382	90.2516123136541	88.3642065484228	83.9050992756407	68.1421187579502
91.8603802946699	91.9056067674937	91.903517608027	91.8267003593173	91.6190134740845	91.1723112010209	90.2661478666909	88.3821279398952	83.930748198183	68.1965849584568
91.8708318582319	91.9160967798086	91.9142008351044	91.8377605690081	91.6307049815111	91.1850413753883	90.2806635545488	88.4000230708908	83.9563566577137	68.2509501067512
91.8812735958031	91.9265766604217	91.9248732072895	91.848808756259	91.6423827711557	91.1977553985764	90.2951593975016	88.417891973971	83.9819247145855	68.3052144198556
91.8917055065351	91.9370464092583	91.9355347261146	91.8598449251457	91.6540468507525	91.2104532834404	90.3096354158317	88.4357346816851	84.0074524290839	68.359378114203
91.9021275896091	91.9475060262736	91.9461853931417	91.8708690797725	91.6656972280609	91.2231350428546	90.3240916298291	88.4535512265703	84.0329398614271	68.4134414056386
91.9125398442363	91.9579555114524	91.9568252099623	91.8818812242718	91.6773339108656	91.2358006897121	90.3385280597921	88.4713416411512	84.0583870717661	68.4674045094227
91.9229422696573	91.9683948648094	91.9674541781976	91.8928813628046	91.6889569069764	91.248450236925	90.3529447260267	88.4891059579399	84.0837941201845	68.5212676402325
91.9333348651426	91.9788240863889	91.9780722994981	91.90386949956	91.7005662242278	91.2610836974237	90.3673416488465	88.506844209436	84.1091610666984	68.575031012164
91.9437176299919	91.9892431762648	91.9886795755438	91.9148456387555	91.7121618704795	91.2737010841572	90.3817188485725	88.5245564281258	84.1344879712566	68.628694838735
91.9540905635349	91.9996521345406	91.9992760080442	91.9258097846362	91.7237438536157	91.2863024100929	90.3960763455333	88.5422426464832	84.1597748937403	68.6822593328861
91.9644536651308	92.0100509613495	92.0098615987378	91.9367619414755	91.7353121815452	91.2988876882164	90.4104141600642	88.5599028969684	84.1850218939631	68.7357247069838
91.974806934168	92.0204396568538	92.0204363493926	91.9477021135746	91.7468668622015	91.3114569315313	90.4247323125081	88.5775372120286	84.210229031671	68.789091172822
91.9851503700648	92.0308182212456	92.0310002618055	91.9586303052624	91.7584079035421	91.324010153059	90.4390308232142	88.5951456240977	84.2353963665423	68.8423589416244
91.9954839722686	92.0411866547462	92.0415533378026	91.9695465208955	91.7699353135491	91.336547365839	90.4533097125389	88.6127281655957	84.2605239581876	68.8955282240463
92.0058077402564	92.0515449576065	92.0520955792389	91.9804507648579	91.7814491002283	91.3490685829281	90.4675690008449	88.6302848689293	84.2856118661497	68.9485992301771
92.0161216735347	92.0618931301063	92.0626269879986	91.9913430415614	91.7929492716099	91.3615738174008	90.4818087085014	88.647815766491	84.3106601499037	69.0015721695419
92.0264257716392	92.072231172555	92.0731475659944	92.0022233554449	91.8044358357478	91.3740630823489	90.4960288558839	88.6653208906596	84.3356688688566	69.0544472511041
92.0367200341347	92.0825590852912	92.083657315168	92.0130917109746	91.8159088007196	91.3865363908814	90.5102294633742	88.6828002737995	84.3606380823476	69.1072246832666
92.0470044606159	92.0928768686824	92.0941562374899	92.0239481126442	91.8273681746266	91.3989937561244	90.5244105513597	88.7002539482612	84.385567849648	69.1599046738749
92.057279050706	92.1031845231255	92.1046443349592	92.0347925649742	91.8388139655936	91.4114351912209	90.538572140234	88.7176819463805	84.4104582299609	69.2124874302182
92.067543804058	92.1134820490463	92.1151216096034	92.045625072512	91.8502461817688	91.423860709331	90.5527142503963	88.7350843004788	84.4353092824216	69.2649731590321
92.0777987203538	92.1237694468998	92.1255880634789	92.0564456398323	91.8616648313238	91.436270323631	90.5668369022512	88.7524610428629	84.460121066097	69.3173620665
92.0880437993044	92.1340467171697	92.1360436986702	92.0672542715362	91.8730699224532	91.4486640473143	90.5809401162091	88.7698122058247	84.484893639986	69.3696543582555
92.0982790406502	92.1443138603688	92.1464885172903	92.0780509722519	91.8844614633747	91.4610418935901	90.5950239126852	88.7871378216413	84.5096270630193	69.4218502393845
92.1085044441603	92.1545708770388	92.1569225214806	92.0888357466339	91.895839462329	91.4734038756845	90.6090883121003	88.8044379225746	84.5343213940594	69.4739499144266
92.118720009633	92.1648177677501	92.1673457134106	92.0996085993634	91.9072039275795	91.4857500068392	90.6231333348798	88.8217125408715	84.5589766919005	69.5259535873776
92.1289257368956	92.1750545331021	92.1777580952781	92.1103695351479	91.9185548674124	91.4980803003123	90.6371590014542	88.8389617087633	84.5835930152684	69.5778614616914
92.1391216258043	92.1852811737226	92.188159669309	92.1211185587214	91.9298922901364	91.5103947693776	90.6511653322586	88.8561854584662	84.6081704228207	69.6296737402816
92.1493076762443	92.1954976902683	92.1985504377571	92.1318556748441	91.9412162040827	91.5226934273247	90.6651523477327	88.8733838221805	84.6327089731465	69.6813906255237
92.1594838881296	92.2057040834245	92.2089304029043	92.1425808883023	91.9525266176049	91.5349762874587	90.6791200683207	88.8905568320911	84.6572087247665	69.7330123192571
92.1696502614029	92.215900353905	92.2192995670602	92.1532942039084	91.9638235390788	91.5472433631004	90.6930685144711	88.9077045203669	84.6816697361329	69.7845390227867
92.1798067960359	92.2260865024522	92.2296579325625	92.1639956265007	91.9751069769022	91.5594946675858	90.7069977066365	88.9248269191607	84.7060920656294	69.8359709368852
92.189953492029	92.2362625298369	92.2400055017764	92.1746851609435	91.986376939495	91.5717302142661	90.7209076652734	88.9419240606096	84.7304757715712	69.8873082617948
92.2000903494113	92.2464284368583	92.2503422770949	92.1853628121267	91.9976334352991	91.5839500165077	90.7347984108425	88.9589959768342	84.7548209122048	69.938551197229
92.2102173682405	92.2565842243441	92.2606682609385	92.1960285849659	92.008876472778	91.5961540876919	90.748669963808	88.9760426999388	84.7791275457084	69.9896999423745
92.2203345486029	92.2667298931502	92.2709834557554	92.2066824844026	92.020106060417	91.6083424412149	90.7625223446379	88.9930642620113	84.8033957301912	70.0407546958934
92.2304418906136	92.2768654441607	92.2812878640212	92.2173245154033	92.0313222067229	91.6205150904875	90.7763555738035	89.0100606951232	84.8276255236939	70.0917156559245
92.240539394416	92.2869908782881	92.2915814882388	92.2279546829604	92.0425249202237	91.6326720489352	90.7901696717797	89.0270320313289	84.8518169841884	70.1425830200857
92.2506270601822	92.2971061964728	92.3018643309384	92.2385729920912	92.0537142094692	91.6448133299978	90.8039646590443	89.0439783026664	84.875970169578	70.1933569854755
92.2607048881125	92.3072113996836	92.3121363946776	92.2491794478384	92.06489008303	91.6569389471295	90.8177405560784	89.0608995411564	84.9000851376972	70.2440377486751
92.2707728784359	92.3173064889171	92.3223976820411	92.2597740552698	92.0760525494979	91.6690489137989	90.8314973833662	89.0777957788029	84.9241619463115	70.2946255057497
92.2808310314095	92.3273914651979	92.3326481956408	92.2703568194782	92.0872016174858	91.6811432434883	90.8452351613943	89.0946670475924	84.9482006531178	70.345120452251
92.290879347319	92.3374663295788	92.3428879381153	92.2809277455815	92.0983372956274	91.6932219496942	90.8589539106525	89.1115133794943	84.972201315744	70.3955227832185
92.3009178264781	92.3475310831401	92.3531169121306	92.2914868387222	92.109459592577	91.7052850459268	90.8726536516328	89.1283348064606	84.9961639917493	70.4458326931818
92.310946469229	92.3575857269903	92.3633351203792	92.3020341040677	92.1205685170098	91.7173325457102	90.8863344048297	89.1451313604256	85.0200887386238	70.4960503761616
92.3209652759419	92.3676302622653	92.3735425655808	92.31256954681	92.1316640776214	91.7293644625818	90.8999961907402	89.1619030733062	85.0439756137887	70.5461760256725
92.3309742470151	92.3776646901291	92.3837392504814	92.3230931721656	92.1427462831279	91.7413808100926	90.9136390298633	89.1786499770014	85.0678246745963	70.5962098347237
92.3409733828752	92.3876890117731	92.3939251778541	92.3336049853757	92.1538151422656	91.7533816018069	90.9272629427002	89.1953721033923	85.0916359783298	70.6461519958216
92.3509626839768	92.3977032284165	92.4041003504983	92.3441049917056	92.164870663791	91.7653668513022	90.9408679497538	89.2120694843421	85.1154095822037	70.6960027009714
92.3609421508024	92.4077073413057	92.41426477124	92.3545931964451	92.1759128564809	91.7773365721691	90.954454071529	89.2287421516959	85.139145543363	70.7457621416783
92.3709117838626	92.417701351715	92.4244184429317	92.365069604908	92.1869417291318	91.7892907780111	90.9680213285324	89.2453901372805	85.1628439188839	70.79543050895
92.3808715836956	92.4276852609459	92.4345613684522	92.3755342224324	92.1979572905603	91.8012294824447	90.981569741272	89.2620134729045	85.1865047657736	70.8450079932979
92.3908215508679	92.4376590703275	92.4446935507068	92.3859870543804	92.2089595496026	91.8131526990988	90.9950993302574	89.2786121903581	85.2101281409701	70.894494784739
92.4007616859736	92.4476227812158	92.4548149926267	92.3964281061377	92.2199485151147	91.8250604416152	91.0086101159993	89.2951863214127	85.2337141013422	70.9438910727977
92.4106919896345	92.4575763949946	92.4649256971696	92.4068573831143	92.230924195972	91.836952723648	91.0221021190099	89.3117358978214	85.2572627036896	70.9931970465074
92.4206124625002	92.4675199130746	92.475025667319	92.4172748907435	92.2418866010694	91.8488295588638	91.035575359802	89.3282609513183	85.2807740047431	71.0424128944122
92.4305231052481	92.4774533368936	92.4851149060846	92.4276806344826	92.2528357393212	91.8606909609413	91.0490298588898	89.3447615136188	85.3042480611638	71.0915388045686
92.440423918583	92.4873766679167	92.4951934165019	92.4380746198123	92.2637716196608	91.8725369435714	91.0624656367881	89.3612376164192	85.3276849295441	71.1405749645473
92.4503149032374	92.4972899076359	92.5052612016325	92.4484568522366	92.2746942510408	91.8843675204568	91.0758827140124	89.3776892913967	85.351084666407	71.1895215614346
92.4601960599713	92.5071930575703	92.5153182645635	92.4588273372831	92.2856036424327	91.8961827053125	91.0892811110788	89.3941165702096	85.3744473282061	71.2383787818344
92.4700673895721	92.5170861192657	92.5253646084079	92.4691860805026	92.296499802827	91.9079825118648	91.1026608485039	89.4105194844966	85.3977729713261	71.2871468118696
92.4799288928549	92.5269690942951	92.5354002363042	92.4795330874691	92.307382741233	91.9197669538519	91.1160219468046	89.4268980658771	85.4210616520822	71.3358258371838
92.4897805706618	92.5368419842579	92.5454251514167	92.4898683637796	92.3182524666786	91.9315360450235	91.1293644264979	89.443252345951	85.4443134267204	71.3844160429432
92.4996224238624	92.5467047907806	92.555439356935	92.5001919150542	92.3291089882104	91.9432897991407	91.1426883081012	89.4595823562988	85.4675283514174	71.4329176138379
92.5094544533538	92.5565575155162	92.5654428560742	92.5105037469359	92.3399523148932	91.9550282299758	91.1559936121316	89.4758881284811	85.4907064822806	71.4813307340836
92.5192766600599	92.5664001601443	92.5754356520747	92.5208038650906	92.3507824558104	91.9667513513124	91.1692803591062	89.4921696940387	85.5138478753481	71.5296555874235
92.529089044932	92.5762327263713	92.5854177482023	92.5310922752067	92.3615994200638	91.9784591769451	91.1825485695419	89.5084270844925	85.5369525865886	71.5778923571294
92.5388916089486	92.5860552159298	92.5953891477478	92.5413689829954	92.3724032167729	91.9901517206795	91.1957982639552	89.5246603313436	85.5600206719016	71.6260412260037
92.5486843531151	92.5958676305791	92.6053498540273	92.5516339941905	92.3831938550757	92.001828996332	91.2090294628619	89.5408694660729	85.5830521871172	71.6741023763812
92.558467278464	92.6056699721047	92.6152998703819	92.5618873145481	92.3939713441279	92.0134910177297	91.2222421867777	89.5570545201409	85.6060471879961	71.7220759901299
92.5682403860548	92.6154622423186	92.6252392001776	92.5721289498468	92.404735693103	92.0251377987103	91.2354364562171	89.5732155249881	85.6290057302296	71.7699622486535
92.5780036769738	92.6252444430589	92.6351678468054	92.5823589058874	92.4154869111924	92.0367693531222	91.2486122916941	89.5893525120344	85.6519278694398	71.8177613328922
92.5877571523343	92.63501657619	92.6450858136812	92.592577188493	92.4262250076051	92.0483856948238	91.2617697137216	89.6054655126795	85.6748136611793	71.8654734233249
92.5975008132763	92.6447786436025	92.6549931042455	92.6027838035086	92.4369499915676	92.059986837684	91.2749087428116	89.6215545583022	85.6976631609313	71.9130986999702
92.6072346609666	92.6545306472129	92.6648897219635	92.6129787568014	92.4476618723236	92.071572795582	91.2880293994747	89.6376196802607	85.7204764241096	71.9606373423887
92.6169586965987	92.664272588964	92.674775670325	92.6231620542604	92.4583606591346	92.0831435824067	91.3011317042206	89.6536609098926	85.7432535060587	72.0080895296836
92.6266729213928	92.6740044708244	92.6846509528446	92.6333337017965	92.4690463612788	92.0946992120572	91.3142156775574	89.6696782785146	85.7659944620535	72.0554554405029
92.6363773365956	92.6837262947885	92.694515573061	92.6434937053423	92.4797189880519	92.1062396984424	91.3272813399917	89.6856718174222	85.7886993472998	72.1027352530408
92.6460719434805	92.6934380628768	92.7043695345374	92.6536420708521	92.4903785487665	92.1177650554807	91.3403287120285	89.7016415578901	85.8113682169336	72.1499291450393
92.655756743347	92.7031397771353	92.7142128408614	92.6637788043017	92.5010250527519	92.1292752971004	91.3533578141712	89.7175875311719	85.8340011260218	72.1970372937892
92.6654317375216	92.7128314396359	92.7240454956448	92.6739039116883	92.5116585093546	92.1407704372392	91.3663686669214	89.7335097684997	85.8565981295617	72.2440598761325
92.6750969273566	92.7225130524762	92.7338675025235	92.6840173990307	92.5222789279374	92.1522504898439	91.3793612907786	89.7494083010845	85.8791592824813	72.2909970684632
92.6847523142312	92.7321846177793	92.7436788651576	92.6941192723687	92.5328863178801	92.1637154688711	91.3923357062405	89.7652831601159	85.901684639639	72.3378490467288
92.6943978995504	92.7418461376938	92.753479587231	92.7042095377637	92.5434806885786	92.1751653882861	91.4052919338025	89.7811343767619	85.9241742558239	72.3846159864326
92.7040336847456	92.7514976143938	92.7632696724517	92.7142882012978	92.5540620494454	92.1866002620635	91.4182299939579	89.796961982169	85.9466281857558	72.4312980626339
92.7136596712743	92.7611390500789	92.7730491245516	92.7243552690744	92.5646304099095	92.1980201041869	91.4311499071975	89.8127660074618	85.9690464840847	72.4778954499507
92.7232758606203	92.7707704469739	92.7828179472863	92.7344107472178	92.5751857794157	92.2094249286486	91.4440516940098	89.8285464837436	85.9914292053915	72.5244083225604
92.7328822542931	92.7803918073289	92.7925761444351	92.7444546418729	92.5857281674252	92.2208147494496	91.4569353748807	89.8443034420953	86.0137764041876	72.5708368542016
92.7424788538286	92.7900031334194	92.8023237198011	92.7544869592058	92.5962575834151	92.2321895805998	91.4698009702933	89.8600369135763	86.0360881349149	72.6171812181755
92.7520656607882	92.799604427546	92.8120606772107	92.7645077054028	92.6067740368784	92.2435494361173	91.4826485007282	89.8757469292238	86.058364451946	72.6634415873471
92.7616426767594	92.8091956920341	92.821787020514	92.7745168866713	92.6172775373239	92.254894330029	91.4954779866629	89.8914335200529	86.0806054095838	72.7096181341473
92.7712099033557	92.8187769292345	92.8315027535845	92.7845145092386	92.6277680942761	92.2662242763697	91.5082894485722	89.9070967170565	86.1028110620622	72.7557110305734
92.780767342216	92.8283481415228	92.8412078803188	92.794500579353	92.6382457172751	92.2775392891828	91.5210829069274	89.9227365512053	86.1249814635453	72.8017204481915
92.7903149950052	92.8379093312995	92.8509024046372	92.8044751032826	92.6487104158766	92.2888393825195	91.5338583821972	89.9383530534477	86.1471166681281	72.8476465581371
92.7998528634136	92.8474605009901	92.8605863304827	92.8144380873162	92.6591621996516	92.3001245704392	91.5466158948465	89.9539462547095	86.1692167298361	72.8934895311172
92.8093809491573	92.8570016530445	92.8702596618219	92.8243895377625	92.6696010781864	92.3113948670091	91.5593554653371	89.969516185894	86.1912817026251	72.9392495374111
92.8188992539778	92.8665327899379	92.8799224026439	92.8343294609501	92.6800270610826	92.3226502863043	91.5720771141274	89.9850628778821	86.2133116403821	72.9849267468723
92.8284077796423	92.8760539141695	92.8895745569614	92.844257863228	92.6904401579569	92.3338908424076	91.5847808616721	90.0005863615317	86.2353065969242	73.0305213289298
92.8379065279431	92.8855650282636	92.8992161288094	92.8541747509647	92.7008403784409	92.3451165494092	91.5974667284222	90.0160866676784	86.2572666259993	73.076033452589
92.847395500698	92.8950661347688	92.908847122246	92.8640801305487	92.7112277321812	92.3563274214071	91.6101347348249	90.0315638271345	86.279191781286	73.1214632864339
92.8568746997502	92.9045572362581	92.9184675413522	92.8739740083882	92.7216022288393	92.3675234725064	91.6227849013238	90.0470178706897	86.3010821163934	73.166810998628
92.866344126968	92.914038335329	92.9280773902313	92.8838563909109	92.7319638780914	92.3787047168198	91.6354172483583	90.0624488291106	86.3229376848615	73.2120767569155
92.875803784245	92.9235094346033	92.9376766730094	92.8937272845641	92.7423126896282	92.3898711684668	91.6480317963638	90.0778567331407	86.3447585401606	73.2572607286232
92.8852536734998	92.9329705367272	92.9472653938351	92.9035866958146	92.752648673155	92.4010228415744	91.6606285657716	90.0932416135003	86.366544735692	73.3023630806614
92.8946937966762	92.9424216443707	92.9568435568795	92.9134346311486	92.7629718383917	92.4121597502762	91.6732075770086	90.1086035008867	86.3882963247874	73.3473839795255
92.904124155743	92.9518627602285	92.9664111663359	92.9232710970715	92.7732821950723	92.4232819087131	91.6857688504975	90.1239424259738	86.4100133607094	73.3923235912974
92.9135447526939	92.9612938870188	92.9759682264201	92.9330961001079	92.7835797529452	92.4343893310325	91.6983124066565	90.139258419412	86.4316958966512	73.4371820816466
92.9229555895473	92.9707150274843	92.9855147413699	92.9429096468015	92.7938645217729	92.4454820313887	91.7108382658994	90.1545515118284	86.4533439857367	73.4819596158317
92.9323566683469	92.9801261843913	92.9950507154454	92.9527117437151	92.804136511332	92.4565600239422	91.7233464486352	90.1698217338266	86.4749576810206	73.5266563587017
92.9417479911607	92.9895273605301	93.0045761529287	92.9625023974303	92.8143957314131	92.4676233228606	91.7358369752681	90.1850691159865	86.4965370354882	73.5712724746974
92.9511295600817	92.9989185587149	93.014091058124	92.9722816145476	92.8246421918205	92.4786719423174	91.7483098661978	90.2002936888643	86.5180821020557	73.6158081278526
92.9605013772274	93.0082997817834	93.0235954353572	92.9820494016864	92.8348759023724	92.4897058964926	91.7607651418189	90.2154954829927	86.53959293357	73.6602634817955
92.9698634447401	93.0176710325973	93.0330892889763	92.9918057654846	92.8450968729008	92.5007251995725	91.773202822521	90.2306745288804	86.5610695828088	73.70463869975
92.9792157647863	93.0270323140416	93.0425726233509	93.0015507125989	92.855305113251	92.5117298657493	91.7856229286885	90.2458308570123	86.5825121024806	73.748933944537
92.9885583395573	93.0363836290251	93.0520454428724	93.0112842497042	92.8655006332821	92.5227199092214	91.798025480701	90.2609644978493	86.6039205452246	73.7931493785757
92.9978911712687	93.0457249804799	93.0615077519537	93.0210063834941	92.8756834428664	92.533695344193	91.8104104989324	90.2760754818282	86.6252949636109	73.8372851638848
93.0072142621603	93.0550563713616	93.0709595550293	93.0307171206804	92.8858535518897	92.5446561848743	91.8227780037515	90.291163839362	86.6466354101405	73.8813414620839
93.0165276144964	93.0643778046492	93.0804008565552	93.0404164679933	92.8960109702507	92.5556024454809	91.8351280155215	90.3062296008393	86.6679419372453	73.9253184343949
93.0258312305654	93.0736892833449	93.0898316610087	93.050104432181	92.9061557078616	92.5665341402343	91.8474605546002	90.3212727966245	86.6892145972878	73.969216241643
93.0351251126799	93.0829908104743	93.0992519728887	93.0597810200099	92.9162877746475	92.5774512833615	91.8597756413397	90.3362934570579	86.7104534425617	74.0130350442581
93.0444092631768	93.0922823890857	93.108661796715	93.0694462382643	92.9264071805463	92.588353889095	91.8720732960864	90.3512916124551	86.7316585252915	74.0567750022762
93.0536836844166	93.1015640222511	93.1180611370287	93.0791000937465	92.9365139355089	92.5992419716725	91.8843535391809	90.3662672931076	86.7528298976325	74.1004362753403
93.0629483787843	93.1108357130651	93.1274499983921	93.0887425932767	92.946608049499	92.610115545337	91.8966163909578	90.3812205292822	86.7739676116712	74.1440190227022
93.0722033486884	93.1200974646453	93.1368283853883	93.0983737436927	92.9566895324928	92.6209746243369	91.9088618717461	90.3961513512214	86.7950717194248	74.1875234032231
93.0814485965616	93.1293492801324	93.1461963026217	93.10799355185	92.9667583944793	92.6318192229252	91.9210900018682	90.4110597891428	86.8161422728418	74.2309495753755
93.0906841248601	93.1385911626898	93.1555537547172	93.1176020246218	92.9768146454599	92.6426493553604	91.9333008016407	90.4259458732395	86.8371793238014	74.2742976972438
93.0999099360642	93.1478231155036	93.1649007463207	93.1271991688987	92.9868582954482	92.6534650359057	91.9454942913739	90.4408096336796	86.858182924114	74.3175679265262
93.1091260326774	93.1570451417825	93.1742372820988	93.1367849915888	92.9968893544706	92.6642662788289	91.9576704913718	90.4556511006069	86.8791531255211	74.3607604205352
93.1183324172273	93.1662572447583	93.1835633667388	93.1463594996174	93.0069078325651	92.6750530984028	91.969829421932	90.4704703041398	86.9000899796951	74.4038753361996
93.1275290922647	93.1754594276847	93.1928790049484	93.1559226999271	93.0169137397824	92.6858255089046	91.9819711033455	90.485267274372	86.9209935382396	74.4469128300651
93.136716060364	93.1846516938384	93.202184201456	93.1654745994778	93.0269070861849	92.6965835246162	91.9940955558968	90.5000420413722	86.9418638526894	74.4898730582957
93.1458933241233	93.1938340465183	93.2114789610104	93.1750152052464	93.0368878818471	92.7073271598239	92.0062027998639	90.5147946351841	86.9627009745102	74.5327561766751
93.1550608861635	93.2030064890457	93.2207632883805	93.1845445242267	93.0468561368553	92.7180564288183	92.0182928555178	90.5295250858261	86.9835049550992	74.5755623406075
93.1642187491294	93.2121690247643	93.2300371883559	93.1940625634295	93.0568118613076	92.7287713458944	92.030365743123	90.5442334232916	87.0042758457845	74.6182917051194
93.1733669156886	93.2213216570397	93.2393006657461	93.2035693298826	93.0667550653138	92.7394719253511	92.0424214829367	90.5589196775487	87.0250136978256	74.6609444248601
93.1825053885322	93.2304643892601	93.2485537253808	93.2130648306303	93.0766857589953	92.7501581814916	92.0544600952095	90.5735838785402	87.0457185624132	74.7035206541035
93.1916341703741	93.2395972248355	93.2577963721098	93.2225490727337	93.0866039524851	92.7608301286231	92.0664816001847	90.5882260561836	87.0663904906691	74.7460205467487
93.2007532639516	93.2487201671979	93.2670286108029	93.2320220632705	93.0965096559275	92.7714877810566	92.0784860180986	90.6028462403709	87.0870295336466	74.7884442563218
93.2098626720247	93.2578332198015	93.2762504463497	93.2414838093349	93.1064028794782	92.7821311531071	92.0904733691802	90.6174444609687	87.1076357423303	74.8307919359765
93.2189623973765	93.2669363861222	93.2854618836598	93.2509343180375	93.1162836333041	92.7927602590931	92.1024436736513	90.6320207478181	87.128209167636	74.8730637384957
93.2280524428129	93.2760296696577	93.2946629276624	93.2603735965052	93.1261519275833	92.803375113337	92.1143969517262	90.6465751307345	87.148749860411	74.9152598162924
93.2371328111626	93.2851130739277	93.3038535833065	93.2698016518815	93.1360077725052	92.8139757301646	92.1263332236118	90.6611076395078	87.169257871434	74.9573803214109
93.2462035052771	93.2941866024733	93.3130338555606	93.2792184913256	93.1458511782698	92.8245621239052	92.1382525095075	90.6756183039021	87.1897332514151	74.9994254055281
93.2552645280305	93.3032502588574	93.3222037494129	93.2886241220131	93.1556821550884	92.8351343088915	92.150154829605	90.6901071536558	87.2101760509957	75.0413952199545
93.2643158823195	93.3123040466643	93.3313632698709	93.2980185511356	93.1655007131827	92.8456922994595	92.1620402040885	90.7045742184817	87.2305863207491	75.0832899156353
93.2733575710635	93.3213479695001	93.3405124219617	93.3074017859006	93.1753068627857	92.8562361099485	92.1739086531342	90.7190195280662	87.2509641111796	75.1251096431518
93.2823895972043	93.3303820309919	93.3496512107314	93.3167738335315	93.1851006141405	92.8667657547009	92.1857601969106	90.7334431120705	87.2713094727234	75.1668545527222
93.291411963706	93.3394062347885	93.3587796412457	93.3261347012674	93.1948819775011	92.8772812480622	92.1975948555782	90.7478450001292	87.2916224557481	75.2085247942029
93.3004246735551	93.3484205845598	93.3678977185893	93.3354843963632	93.2046509631319	92.8877826043806	92.2094126492897	90.7622252218514	87.311903110553	75.2501205170897
93.3094277297607	93.357425083997	93.377005447866	93.3448229260894	93.2144075813078	92.8982698380077	92.2212135981894	90.7765838068198	87.3321514873691	75.2916418705187
93.3184211353537	93.3664197368125	93.3861028341986	93.3541502977321	93.2241518423138	92.9087429632973	92.2329977224139	90.7909207845911	87.3523676363588	75.3330890032678
93.3274048933875	93.3754045467396	93.3951898827288	93.3634665185927	93.2338837564454	92.9192019946065	92.2447650420911	90.8052361846958	87.3725516076165	75.3744620637572
93.3363790069373	93.3843795175328	93.4042665986175	93.3727715959881	93.243603334008	92.9296469462946	92.256515577341	90.8195300366383	87.3927034511681	75.4157612000512
93.3453434791006	93.3933446529676	93.413332987044	93.3820655372506	93.2533105853173	92.9400778327237	92.2682493482751	90.8338023698965	87.4128232169713	75.4569865598586
93.3542983129969	93.4022999568401	93.4223890532065	93.3913483497275	93.2630055206989	92.9504946682584	92.2799663749964	90.8480532139223	87.4329109549158	75.4981382905345
93.3632435117672	93.4112454329675	93.431434802322	93.4006200407814	93.2726881504881	92.9608974672654	92.2916666775995	90.862282598141	87.4529667148229	75.5392165390809
93.372179078575	93.4201810851876	93.4404702396258	93.40988061779	93.2823584850304	92.9712862441141	92.3033502761703	90.8764905519515	87.4729905464458	75.5802214521478
93.3811050166049	93.4291069173589	93.449495370372	93.4191300881459	93.2920165346809	92.9816610131758	92.3150171907862	90.8906771047263	87.4929824994697	75.6211531760347
93.3900213290638	93.4380229333606	93.458510199833	93.4283684592566	93.3016623098041	92.9920217888242	92.3266674415158	90.9048422858114	87.5129426235116	75.6620118566912
93.3989280191798	93.4469291370924	93.4675147332995	93.4375957385446	93.3112958207745	93.0023685854351	92.3383010484189	90.9189861245263	87.5328709681205	75.7027976397183
93.407825090203	93.4558255324745	93.4765089760805	93.4468119334469	93.3209170779757	93.012701417386	92.3499180315464	90.9331086501637	87.5527675827774	75.7435106703695
93.4167125454046	93.4647121234474	93.4854929335035	93.4560170514154	93.3305260918011	93.0230202990565	92.3615184109403	90.9472098919898	87.5726325168954	75.7841510935517
93.4255903880777	93.473588913972	93.4944666109138	93.4652110999165	93.3401228726531	93.0333252448282	92.3731022066337	90.9612898792441	87.5924658198197	75.8247190538266
93.4344586215364	93.4824559080296	93.5034300136749	93.474394086431	93.3497074309435	93.0436162690841	92.3846694386506	90.9753486411393	87.6122675408273	75.8652146954112
93.4433172491165	93.4913131096217	93.5123831471684	93.4835660184545	93.3592797770933	93.0538933862092	92.3962201270056	90.9893862068614	87.6320377291276	75.9056381621794
93.4521662741747	93.5001605227697	93.5213260167938	93.4927269034965	93.3688399215326	93.0641566105899	92.4077542917045	91.0034026055695	87.6517764338623	75.9459895976627
93.4610057000893	93.5089981515153	93.5302586279684	93.5018767490812	93.3783878747004	93.0744059566142	92.4192719527435	91.0173978663959	87.671483704105	75.9862691450516
93.4698355302593	93.5178259999202	93.5391809861271	93.5110155627469	93.3879236470447	93.0846414386716	92.4307731301096	91.0313720184459	87.6911595888617	76.026476947196
93.4786557681052	93.5266440720659	93.548093096723	93.5201433520457	93.3974472490224	93.0948630711529	92.4422578437804	91.0453250907978	87.7108041370708	76.0666131466071
93.4874664170682	93.5354523720539	93.5569949652264	93.5292601245443	93.4069586910991	93.1050708684502	92.453726113724	91.059257112503	87.7304173976027	76.1066778854575
93.4962674806106	93.5442509040055	93.5658865971254	93.538365887823	93.4164579837492	93.1152648449567	92.4651779598989	91.0731681125858	87.7499994192606	76.1466713055832
93.5050589622156	93.5530396720617	93.5747679979254	93.5474606494761	93.4259451374556	93.1254450150671	92.476613402254	91.0870581200436	87.7695502507798	76.1865935484838
93.5138408653872	93.5618186803832	93.5836391731496	93.5565444171119	93.4354201627097	93.1356113931768	92.4880324607287	91.1009271638463	87.789069940828	76.2264447553238
93.5226131936499	93.5705879331503	93.5925001283381	93.565617198352	93.4448830700117	93.1457639936823	92.4994351552525	91.114775272937	87.8085585380057	76.2662250669339
93.5313759505493	93.5793474345628	93.6013508690486	93.5746790008323	93.4543338698696	93.1559028309811	92.510821505745	91.1286024762314	87.8280160908455	76.3059346238115
93.5401291396514	93.58809718884	93.6101914008559	93.5837298322017	93.4637725728004	93.1660279194715	92.5221915321161	91.1424088026178	87.847442647813	76.3455735661223
93.5488727645427	93.5968372002206	93.6190217293518	93.5927697001231	93.4731991893286	93.1761392735526	92.5335452542658	91.1561942809576	87.866838257306	76.3851420337006
93.5576068288304	93.6055674729626	93.6278418601456	93.6017986122725	93.4826137299875	93.1862369076239	92.544882692084	91.1699589400847	87.8862029676553	76.424640166051
93.5663313361419	93.6142880113433	93.636651798863	93.6108165763395	93.4920162053181	93.196320836086	92.5562038654504	91.1837028088054	87.905536827124	76.4640681023488
93.5750462901251	93.6229988196594	93.6454515511472	93.6198236000269	93.5014066258695	93.2063910733397	92.567508794235	91.1974259158989	87.9248398839083	76.5034259814415
93.5837516944482	93.6316999022262	93.6542411226578	93.6288196910508	93.5107850021986	93.2164476337864	92.5787974982971	91.2111282901169	87.9441121861369	76.5427139418493
93.5924475527995	93.6403912633787	93.6630205190715	93.6378048571402	93.5201513448704	93.2264905318279	92.5900699974862	91.2248099601834	87.9633537818714	76.5819321217666
93.6011338688877	93.6490729074705	93.6717897460815	93.6467791060375	93.5295056644575	93.2365197818663	92.6013263116413	91.2384709547952	87.9825647191064	76.6210806590624
93.6098106464414	93.6577448388742	93.6805488093977	93.6557424454979	93.5388479715402	93.2465353983039	92.6125664605909	91.2521113026214	88.001745045769	76.6601596912819
93.6184778892093	93.6664070619813	93.6892977147467	93.6646948832896	93.5481782767063	93.2565373955433	92.6237904641532	91.2657310323034	88.0208948097196	76.6991693556468
93.6271356009602	93.6750595812021	93.6980364678715	93.6736364271936	93.5574965905515	93.2665257879872	92.634998342136	91.2793301724552	88.0400140587516	76.738109789057
93.6357837854824	93.6837024009657	93.7067650745314	93.6825670850038	93.5668029236787	93.2765005900383	92.6461901143365	91.2929087516629	88.059102840591	76.7769811280909
93.6444224465847	93.6923355257197	93.7154835405022	93.6914868645265	93.5760972866981	93.2864618160991	92.6573658005411	91.3064667984851	88.0781612028972	76.8157835090067
93.653051588095	93.7009589599305	93.724191871576	93.7003957735809	93.5853796902275	93.2964094805724	92.6685254205257	91.3200043414526	88.0971891932628	76.8545170677434
93.6616712138614	93.7095727080828	93.7328900735611	93.7092938199988	93.5946501448917	93.3063435978605	92.6796689940555	91.3335214090683	88.1161868592133	76.8931819399214
93.6702813277514	93.7181767746799	93.7415781522819	93.7181810116242	93.6039086613228	93.3162641823655	92.6907965408849	91.3470180298075	88.1351542482075	76.9317782608441
93.6788819336522	93.7267711642435	93.7502561135788	93.7270573563138	93.61315525016	93.3261712484893	92.7019080807573	91.3604942321176	88.1540914076374	76.970306165498
93.6874730354705	93.7353558813136	93.7589239633084	93.7359228619363	93.6223899220495	93.3360648106334	92.7130036334053	91.3739500444181	88.1729983848283	77.0087657885544
93.6960546371323	93.7439309304485	93.7675817073431	93.744777536373	93.6316126876443	93.3459448831988	92.7240832185506	91.3873854951005	88.191875227039	77.0471572643699
93.7046267425832	93.7524963162246	93.7762293515712	93.7536213875172	93.6408235576046	93.355811480586	92.7351468559038	91.4008006125287	88.2107219814613	77.0854807269873
93.7131893557879	93.7610520432364	93.7848669018968	93.7624544232744	93.6500225425971	93.3656646171949	92.7461945651645	91.4141954250384	88.2295386952209	77.123736310137
93.7217424807307	93.7695981160967	93.7934943642396	93.771276651562	93.6592096532953	93.3755043074247	92.757226366021	91.4275699609371	88.2483254153765	77.1619241472374
93.7302861214148	93.7781345394361	93.8021117445353	93.7800880803095	93.6683849003796	93.3853305656742	92.7682422781506	91.4409242485048	88.2670821889207	77.200044371396
93.7388202818626	93.7866613179031	93.8107190487347	93.7888887174583	93.6775482945365	93.3951434063409	92.7792423212193	91.4542583159929	88.2858090627795	77.2380971154104
93.7473449661155	93.7951784561642	93.8193162828045	93.7976785709615	93.6866998464596	93.4049428438217	92.7902265148816	91.4675721916251	88.3045060838123	77.2760825117691
93.7558601782341	93.8036859589036	93.8279034527267	93.8064576487841	93.6958395668485	93.4147288925128	92.801194878781	91.4808659035967	88.3231732988126	77.3140006926528
93.7643659222977	93.8121838308231	93.8364805644986	93.8152259589027	93.7049674664093	93.424501566809	92.8121474325493	91.4941394800751	88.3418107545073	77.3518517899344
93.7728622024046	93.8206720766425	93.8450476241329	93.8239835093055	93.7140835558544	93.4342608811043	92.823084195807	91.5073929491995	88.3604184975571	77.3896359351809
93.7813490226719	93.8291507010989	93.8536046376576	93.8327303079922	93.7231878459026	93.4440068497914	92.834005188163	91.5206263390806	88.3789965745565	77.4273532596539
93.7898263872353	93.837619708947	93.8621516111157	93.8414663629741	93.7322803472785	93.4537394872621	92.8449104292147	91.5338396778012	88.3975450320339	77.4650038943102
93.7982943002494	93.8460791049591	93.8706885505654	93.8501916822739	93.7413610707131	93.4634588079067	92.8557999385477	91.5470329934156	88.4160639164516	77.5025879698033
93.8067527658873	93.8545288939246	93.87921546208	93.8589062739254	93.7504300269432	93.4731648261143	92.8666737357361	91.5602063139501	88.4345532742057	77.5401056164836
93.8152017883404	93.8629690806505	93.8877323517475	93.8676101459738	93.7594872267119	93.4828575562724	92.8775318403423	91.5733596674023	88.4530131516265	77.5775569644001
93.8236413718191	93.871399669961	93.8962392256712	93.8763033064755	93.7685326807676	93.4925370127674	92.8883742719166	91.5864930817418	88.4714435949783	77.6149421433004
93.8320715205517	93.8798206666974	93.9047360899687	93.8849857634981	93.7775663998651	93.5022032099839	92.8992010499979	91.5996065849097	88.4898446504593	77.6522612826323
93.8404922387852	93.8882320757181	93.9132229507728	93.89365752512	93.7865883947645	93.5118561623051	92.9100121941129	91.6127002048186	88.5082163642021	77.6895145115443
93.8489035307846	93.8966339018988	93.9216998142309	93.9023185994307	93.7955986762319	93.5214958841125	92.9208077237765	91.6257739693527	88.5265587822733	77.7267019588866
93.8573054008334	93.9050261501319	93.9301666865047	93.9109689945307	93.8045972550387	93.5311223897859	92.9315876584915	91.638827906368	88.5448719506739	77.7638237532118
93.865697853233	93.9134088253271	93.9386235737709	93.9196087185311	93.8135841419621	93.5407356937033	92.9423520177488	91.6518620436917	88.563155915339	77.8008800227761
93.874080892303	93.9217819324104	93.9470704822203	93.928237779554	93.8225593477845	93.5503358102409	92.9531008210271	91.6648764091227	88.5814107221383	77.83787089554
93.8824545223811	93.9301454763252	93.9555074180584	93.936856185732	93.8315228832939	93.5599227537731	92.9638340877929	91.6778710304313	88.5996364168757	77.8747964991687
93.8908187478229	93.9384994620313	93.9639343875048	93.9454639452085	93.8404747592836	93.5694965386721	92.9745518375008	91.6908459353592	88.6178330452896	77.911656961034
93.8991735730017	93.9468438945051	93.9723513967936	93.9540610661373	93.8494149865521	93.5790571793084	92.9852540895928	91.7038011516197	88.6360006530529	77.9484524082141
93.907519002309	93.9551787787398	93.980758452173	93.9626475566828	93.858343575903	93.5886046900502	92.9959408634988	91.7167367068973	88.6541392857731	77.985182967495
93.9158550401537	93.9635041197452	93.9891555599052	93.9712234250197	93.8672605381454	93.5981390852637	93.0066121786363	91.729652628848	88.6722489889922	78.0218487653712
93.9241816909627	93.9718199225472	93.9975427262667	93.9797886793332	93.8761658840929	93.6076603793127	93.0172680544105	91.7425489450992	88.6903298081869	78.0584499280468
93.9324989591803	93.9801261921884	94.0059199575479	93.9883433278185	93.8850596245645	93.617168586559	93.027908510214	91.7554256832495	88.7083817887686	78.0949865814359
93.9408068492684	93.9884229337277	94.0142872600531	93.9968873786814	93.893941770384	93.6266637213619	93.0385335654272	91.7682828708688	88.7264049760836	78.1314588511636
93.9491053657066	93.9967101522403	94.0226446401007	94.0054208401376	93.90281233238	93.6361457980784	93.0491432394176	91.7811205354985	88.7443994154127	78.167866862567
93.9573945129918	94.0049878528173	94.0309921040224	94.0139437204128	93.9116713213861	93.645614831063	93.0597375515405	91.7939387046512	88.7623651519719	78.2042107406961
93.9656742956381	94.0132560405664	94.0393296581643	94.0224560277429	93.9205187482404	93.6550708346677	93.0703165211382	91.8067374058105	88.7803022309119	78.2404906103141
93.9739447181773	94.0215147206111	94.0476573088855	94.0309577703736	93.9293546237857	93.6645138232421	93.0808801675406	91.8195166664315	88.7982106973184	78.2767065958988
93.9822057851582	94.0297638980909	94.0559750625593	94.0394489565607	93.9381789588694	93.673943811133	93.0914285100648	91.8322765139404	88.8160905962122	78.3128588216431
93.9904575011467	94.0380035781614	94.0642829255721	94.0479295945694	93.9469917643436	93.6833608126846	93.1019615680152	91.8450169757346	88.8339419725492	78.348947411456
93.998699870726	94.0462337659938	94.0725809043239	94.056399692675	93.9557930510645	93.6927648422383	93.1124793606832	91.8577380791827	88.8517648712204	78.3849724889633
94.0069328984963	94.0544544667754	94.0808690052282	94.0648592591623	93.9645828298932	93.7021559141327	93.1229819073475	91.8704398516245	88.8695593370518	78.4209341775084
94.0151565890748	94.0626656857092	94.0891472347118	94.0733083023257	93.9733611116946	93.7115340427038	93.1334692272739	91.8831223203706	88.8873254148049	78.4568326001531
94.0233709470955	94.0708674280137	94.0974155992146	94.0817468304693	93.9821279073383	93.7208992422843	93.1439413397153	91.8957855127033	88.9050631491764	78.4926678796787
94.0315759772095	94.0790596989232	94.1056741051898	94.0901748519064	93.9908832276979	93.7302515272042	93.1543982639114	91.9084294558753	88.9227725847984	78.5284401385863
94.0397716840845	94.0872425036875	94.1139227591039	94.0985923749599	93.999627083651	93.7395909117904	93.1648400190891	91.9210541771109	88.9404537662383	78.564149499098
94.0479580724049	94.0954158475718	94.1221615674363	94.106999407962	94.0083594860797	93.7489174103667	93.1752666244621	91.9336597036053	88.958106737999	78.5997960831574
94.0561351468719	94.1035797358568	94.1303905366794	94.115395959254	94.0170804458697	93.7582310372538	93.1856780992311	91.9462460625245	88.975731544519	78.6353800124308
94.0643029122033	94.1117341738386	94.1386096733385	94.1237820371868	94.0257899739108	93.7675318067692	93.1960744625834	91.958813281006	88.9933282301723	78.6709014083076
94.0724613731333	94.1198791668286	94.146818983932	94.1321576501201	94.0344880810969	93.7768197332271	93.2064557336933	91.9713613861578	89.0108968392685	78.7063603919012
94.0806105344128	94.1280147201533	94.1550184749908	94.1405228064226	94.0431747783253	93.7860948309385	93.2168219317219	91.9838904050592	89.0284374160529	78.74175708405
94.0887504008089	94.1361408391544	94.1632081530587	94.1488775144724	94.0518500764973	93.795357114211	93.2271730758169	91.9964003647603	89.0459500047066	78.7770916053177
94.0968809771051	94.1442575291888	94.1713880246923	94.1572217826562	94.0605139865181	93.8046065973486	93.2375091851125	92.0088912922824	89.0634346493465	78.8123640759947
94.1050022681012	94.1523647956284	94.1795580964605	94.1655556193697	94.0691665192961	93.8138432946521	93.2478302787299	92.0213632146173	89.0808913940252	78.8475746160983
94.1131142786133	94.1604626438599	94.187718374945	94.1738790330175	94.0778076857437	93.8230672204186	93.2581363757765	92.0338161587282	89.0983202827315	78.8827233453738
94.1212170134735	94.1685510792852	94.1958688667399	94.1821920320127	94.0864374967764	93.8322783889417	93.2684274953467	92.0462501515489	89.1157213593899	78.9178103832955
94.1293104775302	94.1766301073208	94.2040095784516	94.1904946247773	94.0950559633136	93.8414768145113	93.2787036565209	92.0586652199842	89.133094667861	78.9528358490666
94.1373946756476	94.1846997333981	94.2121405166992	94.1987868197419	94.1036630962777	93.8506625114137	93.2889648783663	92.0710613909097	89.1504402519415	78.9877998616211
94.1454696127059	94.1927599629632	94.2202616881136	94.2070686253455	94.1122589065946	93.8598354939315	93.2992111799364	92.083438691172	89.1677581553643	79.0227025396237
94.1535352936014	94.2008108014767	94.2283730993382	94.2153400500358	94.1208434051936	93.8689957763432	93.3094425802712	92.0957971475884	89.1850484217983	79.0575440014708
94.161591723246	94.2088522544141	94.2364747570287	94.2236011022687	94.1294166030069	93.8781433729238	93.3196590983968	92.108136786947	89.202311094849	79.0923243652915
94.1696389065675	94.216884327265	94.2445666678525	94.2318517905088	94.1379785109701	93.8872782979442	93.3298607533259	92.120457636007	89.2195462180578	79.1270437489481
94.1776768485094	94.224907025534	94.2526488384893	94.2400921232286	94.1465291400218	93.8964005656715	93.3400475640572	92.1327597214981	89.2367538349029	79.1617022700369
94.1857055540308	94.2329203547395	94.2607212756308	94.2483221089091	94.1550685011037	93.9055101903686	93.3502195495759	92.1450430701209	89.2539339887985	79.196300045889
94.1937250281065	94.2409243204147	94.2687839859804	94.2565417560393	94.1635966051603	93.9146071862945	93.3603767288531	92.1573077085469	89.2710867230956	79.230837193571
94.2017352757266	94.2489189281067	94.2768369762534	94.2647510731165	94.1721134631391	93.9236915677039	93.3705191208463	92.1695536634181	89.2882120810816	79.2653138298858
94.2097363018969	94.2569041833772	94.284880253177	94.272950068646	94.1806190859906	93.9327633488476	93.3806467444989	92.1817809613475	89.3053101059806	79.2997300713732
94.2177281116384	94.2648800918017	94.29291382349	94.2811387511409	94.1891134846678	93.941822543972	93.3907596187405	92.1939896289187	89.3223808409532	79.3340860343109
94.2257107099875	94.2728466589699	94.3009376939428	94.2893171291224	94.1975966701267	93.9508691673192	93.4008577624869	92.2061796926862	89.339424329097	79.3683818347148
94.233684101996	94.2808038904855	94.3089518712974	94.2974852111195	94.2060686533258	93.9599032331272	93.4109411946394	92.218351179175	89.3564406134461	79.4026175883404
94.2416482927306	94.2887517919663	94.3169563623275	94.3056430056691	94.2145294452263	93.9689247556293	93.4210099340857	92.2305041148811	89.3734297369717	79.4367934106827
94.2496032872735	94.2966903690437	94.324951173818	94.3137905213156	94.2229790567919	93.9779337490548	93.4310639996995	92.2426385262708	89.3903917425816	79.4709094169777
94.2575490907217	94.3046196273631	94.3329363125653	94.3219277666113	94.2314174989888	93.9869302276282	93.4411034103399	92.2547544397814	89.4073266731208	79.5049657222026
94.2654857081874	94.3125395725837	94.3409117853771	94.3300547501161	94.2398447827857	93.9959142055695	93.4511281848524	92.2668518818208	89.4242345713713	79.5389624410768
94.2734131447975	94.3204502103784	94.3488775990725	94.3381714803972	94.2482609191537	94.0048856970944	93.4611383420678	92.2789308787675	89.4411154800521	79.5728996880624
94.2813314056941	94.3283515464335	94.3568337604816	94.3462779660296	94.256665919066	94.0138447164136	93.4711339008033	92.2909914569709	89.4579694418193	79.6067775773653
94.289240496034	94.3362435864491	94.3647802764458	94.3543742155955	94.2650597934985	94.0227912777335	93.4811148798612	92.3030336427506	89.4747964992664	79.6405962229354
94.2971404209887	94.3441263361388	94.3727171538175	94.3624602376846	94.2734425534288	94.0317253952556	93.49108129803	92.3150574623973	89.4915966949241	79.6743557384676
94.3050311857444	94.3519998012296	94.3806443994601	94.3705360408939	94.281814209837	94.0406470831766	93.5010331740836	92.3270629421721	89.5083700712601	79.7080562374027
94.3129127955021	94.3598639874619	94.388562020248	94.3786016338275	94.2901747737052	94.0495563556884	93.5109705267817	92.3390501083068	89.52511667068	79.7416978329275
94.3207852554772	94.3677189005894	94.3964700230664	94.3866570250968	94.2985242560176	94.0584532269782	93.5208933748696	92.3510189870037	89.5418365355265	79.7752806379764
94.3286485708998	94.375564546379	94.4043684148115	94.3947022233205	94.3068626677602	94.0673377112281	93.530801737078	92.3629696044358	89.55852970808	79.808804765231
94.3365027470141	94.383400930611	94.41225720239	94.4027372371238	94.3151900199211	94.0762098226154	93.5406956321234	92.3749019867468	89.5751962305582	79.8422703271219
94.3443477890792	94.3912280590787	94.4201363927197	94.4107620751396	94.3235063234903	94.0850695753121	93.5505750787076	92.3868161600507	89.5918361451168	79.8756774358286
94.3521837023681	94.3990459375883	94.4280059927286	94.4187767460073	94.3318115894594	94.0939169834856	93.560440095518	92.3987121504324	89.6084494938489	79.9090262032805
94.3600104921682	94.4068545719594	94.4358660093557	94.4267812583733	94.3401058288221	94.1027520612978	93.5702907012274	92.4105899839472	89.6250363187854	79.9423167411577
94.3678281637812	94.4146539680243	94.4437164495501	94.4347756208908	94.3483890525734	94.1115748229058	93.5801269144941	92.422449686621	89.6415966618952	79.9755491608914
94.3756367225229	94.4224441316282	94.4515573202717	94.4427598422198	94.3566612717103	94.1203852824611	93.5899487539616	92.4342912844503	89.6581305650849	80.0087235736649
94.3834361737232	94.4302250686292	94.4593886284907	94.4507339310269	94.3649224972311	94.1291834541103	93.5997562382589	92.4461148034021	89.674638070199	80.041840090414
94.3912265227257	94.4379967848981	94.4672103811875	94.4586978959856	94.373172740136	94.1379693519947	93.6095493860002	92.457920269414	89.6911192190202	80.0748988218278
94.3990077748886	94.4457592863185	94.475022585353	94.4666517457757	94.3814120114264	94.14674299025	93.6193282157851	92.4697077083941	89.707574053269	80.1078998783495
94.4067799355833	94.4535125787865	94.4828252479881	94.4745954890836	94.3896403221052	94.1555043830068	93.6290927461985	92.4814771462212	89.7240026146044	80.140843370177
94.4145430101956	94.4612566682109	94.4906183761039	94.4825291346024	94.3978576831767	94.1642535443901	93.6388429958103	92.4932286087444	89.7404049446231	80.1737294072633
94.4222970041247	94.468991560513	94.4984019767219	94.4904526910312	94.4060641056465	94.1729904885195	93.6485789831757	92.5049621217834	89.7567810848606	80.2065580993176
94.4300419227837	94.4767172616266	94.5061760568731	94.4983661670758	94.4142596005216	94.1817152295093	93.6583007268352	92.5166777111286	89.7731310767902	80.2393295558058
94.4377777715993	94.4844337774977	94.5139406235989	94.5062695714481	94.42244417881	94.1904277814678	93.6680082453142	92.5283754025406	89.7894549618238	80.272043885951
94.4455045560118	94.492141114085	94.5216956839505	94.5141629128664	94.430617851521	94.1991281584981	93.6777015571234	92.5400552217509	89.805752781312	80.3047011987344
94.4532222814749	94.499839277359	94.5294412449888	94.522046200055	94.4387806296651	94.2078163746975	93.6873806807585	92.5517171944612	89.8220245765434	80.337301602896
94.460930953456	94.5075282733029	94.5371773137847	94.5299194417444	94.4469325242537	94.2164924441575	93.6970456347001	92.5633613463439	89.8382703887454	80.3698452069348
94.4686305774358	94.5152081079117	94.5449038974187	94.5377826466712	94.4550735462991	94.2251563809641	93.706696437414	92.5749877030416	89.8544902590843	80.4023321191102
94.4763211589083	94.5228787871927	94.5526210029812	94.5456358235779	94.463203706815	94.2338081991973	93.716333107351	92.586596290168	89.8706842286646	80.4347624474419
94.4840027033807	94.5305403171652	94.5603286375718	94.5534789812131	94.4713230168155	94.2424479129314	93.7259556629467	92.5981871333066	89.8868523385299	80.4671362997111
94.4916752163737	94.5381927038603	94.5680268082999	94.5613121283312	94.4794314873158	94.2510755362349	93.7355641226217	92.6097602580119	89.9029946296625	80.4994537834609
94.499338703421	94.5458359533214	94.5757155222846	94.5691352736924	94.487529129332	94.2596910831704	93.7451585047816	92.6213156898086	89.9191111429836	80.531715005997
94.5069931700693	94.5534700716032	94.5833947866541	94.5769484260627	94.4956159538807	94.2682945677942	93.7547388278166	92.6328534541921	89.9352019193533	80.5639200743883
94.5146386218785	94.5610950647728	94.591064608546	94.5847515942139	94.5036919719794	94.2768860041571	93.7643051101021	92.6443735766281	89.9512669995709	80.5960690954677
94.5222750644215	94.5687109389086	94.5987249951075	94.5925447869234	94.511757194646	94.2854654063037	93.773857369998	92.655876082553	89.9673064243745	80.6281621758325
94.529902503284	94.5763177001008	94.6063759534948	94.6003280129742	94.5198116328993	94.2940327882723	93.7833956258492	92.6673609973735	89.9833202344415	80.6601994218452
94.5375209440645	94.5839153544512	94.6140174908734	94.6081012811548	94.5278552977585	94.3025881640953	93.7929198959852	92.6788283464667	89.9993084703886	80.6921809396343
94.5451303923746	94.5915039080734	94.6216496144179	94.6158646002594	94.5358882002432	94.311131547799	93.8024301987204	92.6902781551806	90.0152711727716	80.7241068350944
94.5527308538383	94.5990833670921	94.629272331312	94.6236179790874	94.5439103513735	94.3196629534034	93.8119265523538	92.7017104488332	90.0312083820856	80.7559772138874
94.5603223340926	94.6066537376437	94.6368856487485	94.6313614264437	94.5519217621701	94.3281823949222	93.8214089751691	92.7131252527133	90.0471201387654	80.787792181443
94.5679048387868	94.6142150258758	94.6444895739291	94.6390949511385	94.5599224436537	94.3366898863629	93.8308774854345	92.72452259208	90.0630064831848	80.8195518429589
94.575478373583	94.6217672379476	94.6520841140644	94.6468185619873	94.5679124068455	94.3451854417267	93.8403321014032	92.7359024921629	90.0788674556576	80.8512563034021
94.5830429441556	94.6293103800292	94.6596692763738	94.6545322678109	94.5758916627669	94.3536690750084	93.8497728413127	92.7472649781621	90.0947030964368	80.882905667509
94.5905985561918	94.6368444583022	94.6672450680856	94.6622360774351	94.5838602224396	94.3621408001964	93.8591997233852	92.7586100752484	90.1105134457154	80.9145000397862
94.5981452153907	94.6443694789592	94.6748114964369	94.669929999691	94.5918180968852	94.3706006312727	93.8686127658273	92.7699378085627	90.1262985436259	80.9460395245113
94.6056829274641	94.6518854482039	94.6823685686733	94.6776140434145	94.5997652971255	94.3790485822127	93.8780119868303	92.7812482032165	90.1420584302406	80.9775242257331
94.6132116981359	94.659392372251	94.6899162920491	94.6852882174466	94.6077018341825	94.3874846669855	93.88739740457	92.7925412842919	90.1577931455717	81.0089542472727
94.6207315331422	94.6668902573262	94.6974546738271	94.6929525306335	94.6156277190781	94.3959088995534	93.8967690372065	92.8038170768415	90.1735027295715	81.0403296927237
94.6282424382314	94.6743791096662	94.7049837212788	94.700606991826	94.623542962834	94.4043212938723	93.9061269028846	92.8150756058881	90.1891872221319	81.0716506654529
94.6357444191637	94.6818589355183	94.712503441684	94.7082516098798	94.631447576472	94.4127218638912	93.9154710197334	92.8263168964252	90.2048466630852	81.1029172686014
94.6432374817115	94.6893297411408	94.7200138423309	94.7158863936553	94.6393415710136	94.4211106235528	93.9248014058662	92.8375409734169	90.2204810922036	81.1341296050843
94.6507216316593	94.6967915328028	94.7275149305161	94.723511352018	94.6472249574803	94.4294875867927	93.9341180793812	92.8487478617976	90.2360905491997	81.1652877775922
94.6581968748032	94.7042443167838	94.7350067135443	94.7311264938376	94.6550977468932	94.4378527675401	93.9434210583604	92.859937586472	90.251675073726	81.1963918885912
94.6656632169515	94.7116880993741	94.7424891987287	94.7387318279887	94.6629599502731	94.4462061797171	93.9527103608704	92.8711101723158	90.2672347053756	81.2274420403236
94.6731206639239	94.7191228868745	94.7499623933905	94.7463273633505	94.6708115786406	94.4545478372391	93.9619860049622	92.8822656441747	90.2827694836821	81.258438334809
94.6805692215522	94.7265486855963	94.7574263048591	94.7539131088066	94.6786526430158	94.4628777540147	93.9712480086709	92.8934040268651	90.298279448119	81.2893808738441
94.6880088956797	94.7339655018614	94.7648809404718	94.7614890732451	94.6864831544183	94.4711959439454	93.9804963900161	92.904525345174	90.313764638101	81.320269759004
94.6954396921612	94.7413733420019	94.772326307574	94.7690552655584	94.6943031238675	94.4795024209261	93.9897311670012	92.9156296238587	90.3292250929829	81.3511050916422
94.7028616168633	94.7487722123603	94.7797624135192	94.7766116946436	94.7021125623819	94.4877971988444	93.9989523576143	92.926716887647	90.3446608520602	81.3818869728917
94.710274675664	94.7561621192892	94.7871892656685	94.7841583694017	94.7099114809797	94.496080291581	94.0081599798275	92.9377871612375	90.3600719545694	81.4126155036653
94.7176788744527	94.7635430691517	94.7946068713909	94.7916952987382	94.7176998906784	94.5043517130096	94.017354051597	92.9488404692989	90.3754584396874	81.4432907846563
94.7250742191302	94.770915068321	94.8020152380634	94.7992224915627	94.7254778024949	94.5126114769966	94.0265345908634	92.9598768364707	90.3908203465323	81.473912916339
94.7324607156087	94.7782781231801	94.8094143730705	94.8067399567891	94.7332452274453	94.5208595974016	94.0357016155511	92.9708962873628	90.4061577141627	81.5044819989693
94.7398383698115	94.7856322401225	94.8168042838045	94.8142477033352	94.7410021765449	94.5290960880768	94.0448551435688	92.9818988465556	90.4214705815787	81.5349981325853
94.7472071876733	94.7929774255512	94.8241849776651	94.821745740123	94.7487486608084	94.5373209628673	94.0539951928094	92.9928845386001	90.4367589877209	81.565461417008
94.7545671751398	94.8003136858796	94.8315564620599	94.8292340760785	94.7564846912494	94.545534235611	94.0631217811497	93.0038533880178	90.4520229714715	81.5958719518416
94.7619183381679	94.8076410275307	94.8389187444037	94.8367127201315	94.7642102788808	94.5537359201383	94.0722349264505	93.0148054193007	90.4672625716534	81.6262298364743
94.7692606827255	94.8149594569372	94.8462718321188	94.8441816812158	94.7719254347146	94.5619260302726	94.0813346465569	93.0257406569113	90.4824778270312	81.6565351700789
94.7765942147916	94.822268980542	94.8536157326351	94.8516409682691	94.7796301697615	94.5701045798298	94.0904209592977	93.0366591252827	90.4976687763106	81.6867880516132
94.7839189403558	94.8295696047972	94.8609504533896	94.8590905902328	94.7873244950316	94.5782715826185	94.099493882486	93.0475608488186	90.5128354581385	81.7169885798205
94.7912348654189	94.8368613361649	94.8682760018266	94.8665305560521	94.7950084215336	94.5864270524398	94.1085534339185	93.0584458518932	90.5279779111037	81.7471368532306
94.7985419959923	94.8441441811167	94.8755923853979	94.8739608746758	94.8026819602753	94.5945710030875	94.1175996313762	93.0693141588512	90.543096173736	81.7772329701599
94.8058403380983	94.8514181461336	94.8828996115622	94.8813815550564	94.8103451222632	94.6027034483477	94.1266324926237	93.0801657940079	90.5581902845071	81.8072770287121
94.8131298977697	94.8586832377062	94.8901976877853	94.88879260615	94.8179979185027	94.6108244019992	94.13565203541	93.0910007816491	90.5732602818304	81.837269126779
94.8204106810503	94.8659394623346	94.8974866215403	94.8961940369164	94.8256403599978	94.6189338778132	94.1446582774674	93.1018191460314	90.5883062040608	81.8672093620406
94.827682693994	94.8731868265281	94.9047664203072	94.9035858563186	94.8332724577515	94.6270318895534	94.1536512365126	93.1126209113818	90.6033280894951	81.8970978319662
94.8349459426656	94.8804253368054	94.9120370915729	94.9109680733231	94.8408942227651	94.6351184509756	94.1626309302457	93.1234061018979	90.6183259763718	81.9269346338145
94.8422004331402	94.8876549996945	94.9192986428313	94.9183406969001	94.8485056660388	94.6431935758283	94.171597376351	93.1341747417478	90.6332999028717	81.9567198646344
94.8494461715033	94.8948758217324	94.9265510815831	94.9257037360227	94.8561067985714	94.6512572778521	94.1805505924965	93.1449268550704	90.6482499071171	81.9864536212653
94.856683163851	94.9020878094656	94.9337944153359	94.9330571996677	94.8636976313599	94.65930957078	94.1894905963339	93.1556624659751	90.6631760271728	82.0161360003381
94.8639114162892	94.9092909694493	94.9410286516039	94.9404010968148	94.8712781754002	94.6673504683372	94.1984174054988	93.166381598542	90.6780783010453	82.0457670982754
94.8711309349346	94.9164853082481	94.9482537979081	94.9477354364472	94.8788484416864	94.6753799842411	94.2073310376106	93.1770842768216	90.6929567666836	82.0753470112921
94.8783417259137	94.9236708324353	94.9554698617761	94.955060227551	94.8864084412112	94.6833981322015	94.2162315102723	93.1877705248353	90.7078114619788	82.1048758353958
94.8855437953634	94.9308475485932	94.9626768507421	94.9623754791155	94.8939581849654	94.69140492592	94.2251188410706	93.1984403665748	90.7226424247644	82.1343536663878
94.8927371494303	94.9380154633131	94.9698747723469	94.9696812001332	94.9014976839385	94.6994003790907	94.2339930475763	93.2090938260029	90.7374496928164	82.1637805998632
94.8999217942716	94.9451745831951	94.9770636341378	94.9769773995993	94.9090269491179	94.7073845053995	94.2428541473434	93.2197309270527	90.752233303853	82.1931567312116
94.9070977360538	94.9523249148478	94.9842434436684	94.9842640865122	94.9165459914895	94.7153573185246	94.2517021579099	93.230351693628	90.7669932955351	82.2224821556177
94.9142649809538	94.9594664648887	94.9914142084987	94.9915412698732	94.9240548220374	94.7233188321361	94.2605370967973	93.2409561496033	90.7817297054661	82.2517569680616
94.9214235351583	94.9665992399442	94.9985759361952	94.9988089586862	94.9315534517436	94.731269059896	94.2693589815109	93.251544318824	90.7964425711922	82.2809812633198
94.9285734048634	94.9737232466488	95.0057286343306	95.0060671619582	94.9390418915886	94.7392080154585	94.2781678295396	93.2621162251057	90.8111319302022	82.3101551359652
94.9357145962755	94.980838491646	95.0128723104837	95.0133158886989	94.9465201525507	94.7471357124697	94.2869636583557	93.2726718922352	90.8257978199279	82.3392786803678
94.9428471156103	94.9879449815875	95.0200069722396	95.0205551479207	94.9539882456064	94.7550521645675	94.2957464854154	93.2832113439696	90.8404402777437	82.3683519906956
94.9499709690934	94.9950427231336	95.0271326271896	95.0277849486385	94.96144618173	94.7629573853817	94.3045163281583	93.2937346040369	90.855059340967	82.3973751609144
94.9570861629596	95.0021317229528	95.0342492829309	95.0350052998702	94.968893971894	94.770851388534	94.3132732040076	93.3042416961359	90.8696550468585	82.4263482847892
94.9641927034535	95.0092119877223	95.0413569470668	95.0422162106358	94.9763316270687	94.7787341876378	94.3220171303701	93.314732643936	90.8842274326215	82.4552714558838
94.9712905968294	95.0162835241271	95.0484556272067	95.0494176899583	94.9837591582222	94.7866057962986	94.3307481246362	93.3252074710773	90.8987765354029	82.4841447675623
94.9783798493504	95.0233463388608	95.0555453309657	95.0566097468628	94.9911765763207	94.7944662281133	94.3394662041796	93.3356662011707	90.9133023922925	82.5129683129886
94.9854604672895	95.030400438625	95.0626260659648	95.0637923903771	94.9985838923278	94.8023154966707	94.3481713863578	93.3461088577979	90.9278050403235	82.5417421851277
94.9925324569288	95.0374458301295	95.0696978398311	95.0709656295313	95.0059811172053	94.8101536155513	94.3568636885114	93.3565354645113	90.9422845164725	82.570466476746
94.9995958245597	95.0444825200922	95.0767606601971	95.0781294733577	95.0133682619124	94.8179805983273	94.365543127965	93.3669460448341	90.9567408576593	82.5991412804116
95.0066505764826	95.0515105152388	95.0838145347012	95.0852839308912	95.020745337406	94.8257964585624	94.3742097220263	93.3773406222603	90.9711741007475	82.627766688495
95.0136967190073	95.0585298223032	95.0908594709876	95.0924290111687	95.0281123546409	94.833601209812	94.3828634879864	93.3877192202547	90.985584282544	82.6563427931697
95.0207342584527	95.0655404480271	95.0978954767058	95.0995647232294	95.0354693245693	94.8413948656231	94.3915044431202	93.3980818622529	90.9999714397994	82.6848696864125
95.0277632011465	95.0725423991602	95.1049225595112	95.1066910761147	95.0428162581409	94.8491774395344	94.4001326046857	93.4084285716613	91.0143356092081	82.713347460004
95.0347835534255	95.0795356824597	95.1119407270644	95.1138080788681	95.050153166303	94.8569489450758	94.4087479899244	93.4187593718571	91.028676827408	82.7417762055294
95.0417953216356	95.0865203046908	95.1189499870318	95.120915740535	95.0574800600006	94.8647093957689	94.4173506160613	93.4290742861884	91.0429951309812	82.7701560143787
95.0487985121313	95.0934962726264	95.125950347085	95.1280140701631	95.0647969501758	94.8724588051269	94.4259405003047	93.4393733379741	91.0572905564534	82.7984869777474
95.055793131276	95.100463593047	95.1329418149011	95.1351030768019	95.0721038477684	94.8801971866541	94.4345176598462	93.449656550504	91.0715631402943	82.8267691866367
95.0627791854421	95.1074222727406	95.1399243981624	95.1421827695029	95.0794007637153	94.8879245538465	94.4430821118608	93.4599239470387	91.0858129189178	82.8550027318546
95.0697566810104	95.1143723185029	95.1468981045565	95.1492531573194	95.086687708951	94.8956409201914	94.4516338735071	93.4701755508099	91.1000399286817	82.8831877040155
95.0767256243705	95.1213137371371	95.1538629417764	95.1563142493068	95.0939646944071	94.9033462991675	94.4601729619266	93.4804113850199	91.1142442058882	82.9113241935417
95.0836860219206	95.1282465354536	95.1608189175199	95.163366054522	95.1012317310127	94.9110407042448	94.4686993942444	93.490631472842	91.1284257867835	82.9394122906632
95.0906378800675	95.1351707202705	95.1677660394904	95.1704085820238	95.1084888296938	94.9187241488845	94.477213187569	93.5008358374206	91.1425847075583	82.9674520854183
95.0975812052265	95.1420862984131	95.1747043153961	95.1774418408727	95.1157360013738	94.9263966465392	94.4857143589918	93.5110245018708	91.1567210043476	82.9954436676544
95.1045160038212	95.1489932767139	95.1816337529502	95.184465840131	95.1229732569733	94.9340582106529	94.4942029255879	93.5211974892788	91.1708347132308	83.0233871270281
95.1114422822839	95.1558916620128	95.1885543598709	95.1914805888623	95.1302006074098	94.9417088546605	94.5026789044155	93.5313548227015	91.184925870232	83.0512825530059
95.1183600470549	95.1627814611568	95.1954661438816	95.1984860961321	95.1374180635981	94.9493485919883	94.5111423125161	93.5414965251672	91.1989945113196	83.0791300348648
95.1252693045831	95.1696626810001	95.2023691127102	95.2054823710073	95.1446256364499	94.9569774360539	94.5195931669143	93.5516226196748	91.2130406724069	83.1069296616925
95.1321700613254	95.176535328404	95.2092632740898	95.2124694225564	95.1518233368739	94.9645954002657	94.5280314846182	93.5617331291944	91.227064389352	83.134681522388
95.139062323747	95.1833994102366	95.2161486357579	95.2194472598492	95.159011175776	94.9722024980235	94.536457282619	93.5718280766669	91.2410656979574	83.1623857056623
95.1459460983213	95.1902549333733	95.2230252054571	95.226415891957	95.1661891640586	94.9797987427181	94.544870577891	93.5819074850045	91.2550446339708	83.1900423000386
95.1528213915298	95.1971019046962	95.2298929909345	95.2333753279524	95.1733573126214	94.9873841477315	94.5532713873919	93.5919713770902	91.2690012330848	83.2176513938526
95.1596882098618	95.2039403310945	95.236751999942	95.2403255769095	95.1805156323608	94.9949587264365	94.5616597280625	93.6020197757782	91.2829355309368	83.2452130752537
95.1665465598149	95.2107702194641	95.2436022402358	95.2472666479035	95.18766413417	95.0025224921972	94.5700356168268	93.6120527038936	91.2968475631095	83.2727274322047
95.1733964478943	95.2175915767076	95.250443719577	95.2541985500109	95.194802828939	95.0100754583684	94.5783990705921	93.6220701842326	91.3107373651307	83.3001945524828
95.1802378806134	95.2244044097346	95.2572764457311	95.2611212923094	95.2019317275547	95.0176176382961	94.5867501062486	93.6320722395627	91.3246049724733	83.3276145236796
95.1870708644933	95.2312087254611	95.2641004264679	95.268034883878	95.2090508409005	95.0251490453173	94.5950887406699	93.6420588926223	91.3384504205555	83.3549874332022
95.1938954060628	95.2380045308099	95.2709156695619	95.2749393337965	95.2161601798567	95.0326696927596	94.6034149907127	93.6520301661209	91.3522737447409	83.382313368273
95.2007115118586	95.2447918327103	95.2777221827916	95.281834651146	95.2232597553	95.0401795939419	94.6117288732167	93.6619860827392	91.3660749803386	83.4095924159307
95.2075191884248	95.2515706380983	95.2845199739402	95.2887208450086	95.230349578104	95.0476787621737	94.6200304050049	93.671926665129	91.379854162603	83.4368246630304
95.2143184423135	95.2583409539161	95.291309050795	95.2955979244674	95.2374296591387	95.0551672107554	94.6283196028833	93.6818519359132	91.3936113267341	83.4640101962443
95.2211092800841	95.2651027871127	95.2980894211474	95.3024658986063	95.2445000092706	95.0626449529783	94.636596483641	93.6917619176861	91.4073465078777	83.491149102062
95.2278917083035	95.2718561446432	95.3048610927932	95.3093247765104	95.2515606393629	95.0701120021245	94.6448610640505	93.701656633013	91.4210597411251	83.5182414667911
95.2346657335464	95.2786010334691	95.3116240735323	95.3161745672654	95.2586115602752	95.0775683714668	94.6531133608669	93.7115361044303	91.4347510615134	83.5452873765576
95.2414313623945	95.2853374605583	95.3183783711685	95.3230152799579	95.2656527828636	95.0850140742688	94.6613533908287	93.7214003544458	91.4484205040257	83.5722869173064
95.2481886014372	95.2920654328848	95.32512399351	95.3298469236753	95.2726843179804	95.0924491237848	94.6695811706574	93.7312494055385	91.4620681035906	83.5992401748016
95.2549374572711	95.298784957429	95.3318609483686	95.3366695075059	95.2797061764745	95.09987353326	94.6777967170577	93.7410832801586	91.4756938950832	83.6261472346272
95.2616779365	95.3054960411772	95.3385892435604	95.3434830405383	95.2867183691912	95.1072873159299	94.686000046717	93.7509020007275	91.4892979133242	83.6530081821873
95.2684100457352	95.312198691122	95.3453088869051	95.3502875318622	95.2937209069718	95.1146904850211	94.6941911763062	93.7607055896379	91.5028801930807	83.6798231027068
95.2751337915947	95.3188929142619	95.3520198862265	95.3570829905677	95.3007138006542	95.1220830537506	94.702370122479	93.770494069254	91.5164407690658	83.7065920812318
95.2818491807041	95.3255787176014	95.3587222493522	95.3638694257454	95.3076970610724	95.129465035326	94.710536901872	93.7802674619109	91.5299796759389	83.7333152026298
95.2885562196958	95.3322561081512	95.3654159841133	95.3706468464867	95.3146706990566	95.1368364429456	94.7186915311052	93.7900257899154	91.5434969483058	83.7599925515904
95.2952549152093	95.3389250929277	95.3721010983451	95.3774152618834	95.3216347254334	95.1441972897983	94.7268340267812	93.7997690755454	91.5569926207186	83.7866242126258
95.3019452738911	95.345585678953	95.3787775998862	95.3841746810275	95.3285891510252	95.1515475890634	94.734964405486	93.8094973410503	91.5704667276758	83.813210270071
95.3086273023946	95.3522378732554	95.3854454965789	95.3909251130119	95.3355339866507	95.1588873539108	94.7430826837883	93.8192106086506	91.5839193036226	83.8397508080845
95.3153010073802	95.3588816828687	95.3921047962693	95.3976665669295	95.3424692431248	95.166216597501	94.75118887824	93.8289089005387	91.5973503829506	83.8662459106484
95.3219663955148	95.3655171148324	95.3987555068069	95.4043990518738	95.3493949312583	95.173535332985	94.7592830053759	93.8385922388777	91.6107599999982	83.8926956615695
95.3286234734725	95.3721441761918	95.4053976360447	95.4111225769383	95.356311061858	95.180843573504	94.7673650817137	93.8482606458028	91.6241481890505	83.9191001444787
95.3352722479338	95.3787628739978	95.4120311918391	95.4178371512171	95.3632176457269	95.18814133219	94.7754351237543	93.8579141434201	91.6375149843394	83.9454594428327
95.3419127255861	95.3853732153068	95.4186561820501	95.4245427838043	95.3701146936636	95.1954286221651	94.7834931479813	93.8675527538074	91.6508604200436	83.9717736399132
95.3485449131233	95.3919752071809	95.425272614541	95.4312394837944	95.3770022164631	95.2027054565422	94.7915391708616	93.877176499014	91.664184530289	83.9980428188283
95.3551688172459	95.3985688566874	95.4318804971783	95.4379272602818	95.3838802249159	95.2099718484241	94.7995732088447	93.8867854010606	91.6774873491481	84.0242670625125
95.361784444661	95.4051541708992	95.4384798378321	95.4446061223611	95.3907487298085	95.2172278109043	94.8075952783633	93.8963794819393	91.6907689106408	84.050446453727
95.3683918020822	95.4117311568947	95.4450706443754	95.4512760791272	95.3976077419233	95.2244733570667	94.8156053958329	93.9059587636138	91.7040292487341	84.0765810750606
95.3749908962294	95.4182998217573	95.4516529246847	95.4579371396747	95.4044572720385	95.2317084999851	94.823603577652	93.9155232680195	91.7172683973421	84.1026710089296
95.3815817338292	95.4248601725762	95.4582266866394	95.4645893130984	95.411297330928	95.2389332527241	94.8315898402021	93.925073017063	91.7304863903262	84.1287163375788
95.3881643216141	95.4314122164454	95.4647919381221	95.4712326084931	95.4181279293614	95.2461476283383	94.8395641998476	93.9346080326227	91.7436832614954	84.1547171430812
95.3947386663233	95.4379559604642	95.4713486870187	95.4778670349532	95.4249490781042	95.2533516398726	94.8475266729356	93.9441283365486	91.7568590446058	84.1806735073392
95.401304774702	95.4444914117373	95.4778969412178	95.4844926015734	95.4317607879175	95.2605453003621	94.8554772757964	93.9536339506622	91.7700137733612	84.2065855120845
95.4078626535018	95.4510185773743	95.4844367086112	95.491109317448	95.4385630695579	95.2677286228323	94.8634160247432	93.9631248967566	91.7831474814128	84.2324532388788
95.4144123094803	95.4575374644899	95.4909679970935	95.4977171916713	95.4453559337778	95.2749016202987	94.8713429360719	93.9726011965965	91.7962602023597	84.2582767691139
95.4209537494012	95.4640480802037	95.4974908145623	95.5043162333371	95.4521393913253	95.2820643057671	94.8792580260615	93.9820628719185	91.8093519697485	84.2840561840127
95.4274869800344	95.4705504316406	95.5040051689182	95.5109064515391	95.4589134529437	95.2892166922335	94.8871613109738	93.9915099444306	91.8224228170735	84.309791564629
95.4340120081557	95.4770445259301	95.5105110680643	95.5174878553708	95.4656781293723	95.2963587926839	94.8950528070535	94.0009424358126	91.8354727777771	84.3354829918481
95.4405288405469	95.4835303702068	95.5170085199067	95.5240604539251	95.4724334313454	95.3034906200945	94.9029325305282	94.0103603677159	91.8485018852493	84.3611305463877
95.4470374839957	95.49000797161	95.5234975323541	95.5306242562948	95.4791793695932	95.3106121874316	94.9108004976084	94.0197637617639	91.8615101728285	84.3867343087974
95.4535379452958	95.4964773372838	95.5299781133182	95.5371792715722	95.4859159548411	95.3177235076517	94.9186567244874	94.0291526395513	91.8744976738007	84.4122943594601
95.4600302312465	95.5029384743773	95.536450270713	95.543725508849	95.4926431978102	95.3248245937011	94.9265012273415	94.0385270226449	91.8874644214003	84.4378107785916
95.4665143486531	95.509391390044	95.5429140124552	95.5502629772166	95.4993611092166	95.3319154585165	94.9343340223298	94.0478869325833	91.9004104488097	84.4632836462416
95.4729903043264	95.5158360914422	95.5493693464642	95.5567916857659	95.506069699772	95.3389961150244	94.9421551255943	94.0572323908765	91.9133357891599	84.4887130422938
95.4794581050832	95.5222725857348	95.5558162806618	95.5633116435871	95.5127689801835	95.3460665761414	94.9499645532598	94.0665634190069	91.9262404755298	84.5140990464663
95.4859177577457	95.5287008800891	95.5622548229724	95.5698228597698	95.5194589611533	95.353126854774	94.957762321434	94.0758800384282	91.9391245409469	84.5394417383121
95.4923692691418	95.5351209816774	95.5686849813227	95.5763253434032	95.5261396533791	95.3601769638187	94.9655484462075	94.0851822705662	91.9519880183872	84.5647411972197
95.4988126461048	95.5415328976759	95.575106763642	95.5828191035756	95.5328110675536	95.3672169161622	94.9733229436536	94.0944701368186	91.9648309407752	84.5899975024131
95.5052478954738	95.5479366352657	95.5815201778619	95.5893041493747	95.5394732143649	95.3742467246808	94.9810858298287	94.1037436585549	91.977653340984	84.6152107329525
95.511675024093	95.554332201632	95.5879252319161	95.5957804898876	95.5461261044963	95.3812664022409	94.9888371207718	94.1130028571165	91.9904552518353	84.6403809677346
95.5180940388123	95.5607196039645	95.5943219337409	95.6022481342003	95.5527697486262	95.3882759616989	94.9965768325048	94.1222477538167	92.0032367060996	84.665508285493
95.5245049464869	95.5670988494572	95.6007102912747	95.6087070913984	95.5594041574282	95.3952754159008	95.0043049810326	94.1314783699409	92.0159977364963	84.6905927647986
95.5309077539771	95.5734699453083	95.6070903124581	95.6151573705663	95.5660293415708	95.4022647776829	95.0120215823427	94.1406947267463	92.0287383756935	84.7156344840602
95.5373024681489	95.5798328987203	95.613462005234	95.6215989807878	95.572645311718	95.4092440598709	95.0197266524057	94.1498968454622	92.0414586563085	84.7406335215246
95.5436890958732	95.5861877168999	95.6198253775473	95.6280319311456	95.5792520785284	95.4162132752806	95.0274202071747	94.1590847472898	92.0541586109072	84.765589955277
95.5500676440261	95.5925344070578	95.6261804373448	95.6344562307216	95.585849652656	95.4231724367177	95.0351022625859	94.1682584534023	92.066838272005	84.7905038632417
95.556438119489	95.5988729764089	95.6325271925758	95.6408718885966	95.5924380447495	95.4301215569776	95.0427728345583	94.1774179849452	92.0794976720664	84.8153753231823
95.5628005291484	95.605203432172	95.6388656511913	95.6472789138507	95.5990172654528	95.4370606488453	95.0504319389936	94.1865633630357	92.0921368435048	84.840204412702
95.5691548798956	95.6115257815703	95.6451958211443	95.6536773155624	95.6055873254048	95.4439897250959	95.0580795917764	94.1956946087633	92.1047558186832	84.8649912092442
95.5755011786273	95.6178400318305	95.6515177103898	95.6600671028096	95.612148235239	95.4509087984941	95.0657158087741	94.2048117431895	92.117354629914	84.8897357900928
95.5818394322448	95.6241461901834	95.6578313268845	95.666448284669	95.6187000055842	95.4578178817944	95.0733406058368	94.213914787348	92.1299333094587	84.9144382323726
95.5881696476545	95.6304442638638	95.6641366785873	95.672820870216	95.6252426470637	95.4647169877409	95.0809539987978	94.2230037622447	92.1424918895287	84.9390986130495
95.5944918317676	95.6367342601102	95.6704337734587	95.679184868525	95.6317761702959	95.4716061290676	95.0885560034727	94.2320786888574	92.1550304022846	84.9637170089313
95.6008059915003	95.643016186165	95.6767226194608	95.6855402886689	95.6383005858939	95.4784853184981	95.0961466356603	94.2411395881364	92.1675488798369	84.9882934966676
95.6071121337734	95.6492900492741	95.6830032245578	95.6918871397198	95.6448159044657	95.4853545687456	95.103725911142	94.2501864810039	92.1800473542458	85.0128281527508
95.6134102655125	95.6555558566874	95.6892755967153	95.6982254307481	95.651322136614	95.4922138925131	95.1112938456822	94.2592193883546	92.192525857521	85.0373210535159
95.619700393648	95.6618136156585	95.6955397439008	95.7045551708232	95.6578192929363	95.4990633024933	95.1188504550279	94.2682383310552	92.2049844216224	85.0617722751409
95.6259825251147	95.6680633334443	95.7017956740831	95.710876369013	95.6643073840246	95.5059028113682	95.126395754909	94.2772433299448	92.2174230784595	85.0861818936479
95.6322566668524	95.6743050173055	95.708043395233	95.717189034384	95.6707864204659	95.5127324318099	95.1339297610382	94.2862344058347	92.2298418598921	85.1105499849025
95.6385228258051	95.6805386745064	95.7142829153226	95.7234931760014	95.6772564128417	95.5195521764797	95.141452489111	94.2952115795087	92.2422407977297	85.1348766246149
95.6447810089215	95.6867643123147	95.7205142423253	95.7297888029289	95.6837173717282	95.5263620580287	95.1489639548058	94.3041748717226	92.2546199237322	85.15916188834
95.6510312231548	95.6929819380016	95.7267373842164	95.7360759242287	95.6901693076961	95.5331620890975	95.1564641737836	94.3131243032048	92.2669792696096	85.1834058514778
95.6572734754627	95.6991915588417	95.7329523489724	95.7423545489616	95.6966122313109	95.5399522823164	95.1639531616884	94.3220598946559	92.279318867022	85.2076085892737
95.663507772807	95.705393182113	95.7391591445712	95.7486246861867	95.7030461531325	95.546732650305	95.171430934147	94.330981666749	92.2916387475801	85.2317701768191
95.6697341221542	95.7115868150969	95.745357778992	95.7548863449616	95.7094710837154	95.5535032056727	95.1788975067688	94.3398896401296	92.3039389428448	85.2558906890516
95.675952530475	95.7177724650778	95.7515482602155	95.7611395343424	95.7158870336087	95.5602639610182	95.1863528951461	94.3487838354155	92.3162194843274	85.2799702007554
95.6821630047443	95.7239501393439	95.7577305962235	95.7673842633835	95.7222940133558	95.5670149289298	95.1937971148541	94.3576642731972	92.32848040349	85.3040087865616
95.6883655519412	95.730119845186	95.7639047949991	95.7736205411375	95.7286920334948	95.5737561219853	95.2012301814508	94.3665309740373	92.340721731745	85.3280065209489
95.6945601790491	95.7362815898987	95.7700708645267	95.7798483766556	95.735081104558	95.5804875527519	95.2086521104768	94.3753839584712	92.3529435004557	85.3519634782434
95.7007468930556	95.7424353807791	95.7762288127918	95.7860677789869	95.7414612370725	95.5872092337865	95.2160629174557	94.3842232470067	92.3651457409359	85.3758797326195
95.7069257009522	95.748581225128	95.782378647781	95.7922787571791	95.7478324415593	95.5939211776351	95.2234626178939	94.3930488601241	92.3773284844504	85.3997553581001
95.7130966097346	95.7547191302488	95.788520377482	95.7984813202779	95.7541947285343	95.6006233968334	95.2308512272804	94.4018608182763	92.3894917622149	85.4235904285568
95.7192596264026	95.7608491034481	95.7946540098836	95.8046754773272	95.7605481085073	95.6073159039064	95.2382287610872	94.4106591418888	92.4016356053958	85.4473850177105
95.7254147579596	95.7669711520355	95.8007795529757	95.8108612373691	95.7668925919827	95.6139987113686	95.245595234769	94.4194438513596	92.4137600451107	85.4711391991316
95.7315620114134	95.7730852833236	95.806897014749	95.8170386094437	95.7732281894591	95.6206718317237	95.2529506637634	94.4282149670594	92.4258651124282	85.4948530462404
95.7377013937754	95.7791915046276	95.8130064031952	95.8232076025895	95.7795549114296	95.6273352774651	95.2602950634908	94.4369725093315	92.437950838368	85.5185266323077
95.7438329120609	95.7852898232659	95.8191077263072	95.8293682258426	95.7858727683811	95.6339890610753	95.2676284493543	94.4457164984919	92.4500172539013	85.5421600304546
95.7499565732892	95.7913802465596	95.8252009920783	95.8355204882375	95.7921817707953	95.6406331950263	95.2749508367398	94.4544469548292	92.4620643899501	85.5657533136534
95.756072384483	95.7974627818325	95.8312862085031	95.8416643988066	95.7984819291476	95.6472676917793	95.2822622410161	94.4631638986049	92.4740922773881	85.589306554728
95.7621803526691	95.8035374364111	95.8373633835767	95.8477999665801	95.804773253908	95.6538925637851	95.2895626775348	94.4718673500529	92.4861009470403	85.6128198263535
95.7682804848779	95.809604217625	95.8434325252951	95.8539272005863	95.8110557555405	95.6605078234836	95.2968521616304	94.4805573293801	92.4980904296832	85.6362932010576
95.7743727881432	95.8156631328058	95.8494936416551	95.8600461098515	95.8173294445032	95.667113483304	95.3041307086199	94.4892338567661	92.5100607560448	85.6597267512202
95.7804572695026	95.8217141892883	95.855546740654	95.8661567033996	95.8235943312483	95.6737095556648	95.3113983338033	94.4978969523634	92.5220119568049	85.683120549074
95.7865339359974	95.8277573944097	95.86159183029	95.8722589902524	95.8298504262224	95.6802960529741	95.3186550524636	94.5065466362971	92.5339440625947	85.7064746667048
95.7926027946721	95.8337927555096	95.8676289185617	95.8783529794299	95.8360977398658	95.6868729876287	95.3259008798663	94.5151829286652	92.5458571039973	85.7297891760521
95.798663852575	95.8398202799303	95.8736580134686	95.8844386799494	95.8423362826131	95.6934403720153	95.3331358312599	94.5238058495388	92.5577511115477	85.7530641489091
95.8047171167577	95.8458399750165	95.8796791230106	95.8905161008262	95.8485660648928	95.6999982185093	95.3403599218756	94.5324154189615	92.5696261157328	85.7762996569233
95.8228302175509	95.8638521577512	95.8976946194532	95.9086987757186	95.8672029531225	95.7196146542308	95.3619671811107	94.5581642185561	92.6051374122434	85.8457701062036
