# Supplementary material for: A model of aerosol evaporation kinetics in a thermodenuder
Source: Copernicus journal article supplement (doi:10.5194/amt-3-579-2010), 2010-05-11
Supplement: Supplementary file 1 [file amt-3-579-2010-supplement.zip › Figure 6d Data.txt]

Distance
0
0.0523885021010821
0.104777004202164
0.157165506303246
0.209554008404328
0.26194251050541
0.314331012606492
0.366719514707574
0.419108016808657
0.471496518909739
0.523885021010821
0.576273523111903
0.628662025212985
0.681050527314067
0.733439029415149
0.785827531516231
0.838216033617313
0.890604535718395
0.942993037819477
0.995381539920559
1.04777004202164
1.10015854412272
1.15254704622381
1.20493554832489
1.25732405042597
1.30971255252705
1.36210105462813
1.41448955672922
1.4668780588303
1.51926656093138
1.57165506303246
1.62404356513354
1.67643206723463
1.72882056933571
1.78120907143679
1.83359757353787
1.88598607563895
1.93837457774004
1.99076307984112
2.0431515819422
2.09554008404328
2.14792858614436
2.20031708824545
2.25270559034653
2.30509409244761
2.35748259454869
2.40987109664978
2.46225959875086
2.51464810085194
2.56703660295302
2.6194251050541
2.67181360715519
2.72420210925627
2.77659061135735
2.82897911345843
2.88136761555951
2.9337561176606
2.98614461976168
3.03853312186276
3.09092162396384
3.14331012606492
3.19569862816601
3.24808713026709
3.30047563236817
3.35286413446925
3.40525263657033
3.45764113867142
3.5100296407725
3.56241814287358
3.61480664497466
3.66719514707574
3.71958364917683
3.77197215127791
3.82436065337899
3.87674915548007
3.92913765758115
3.98152615968224
4.03391466178332
4.0863031638844
4.13869166598548
4.19108016808657
4.24346867018765
4.29585717228873
4.34824567438981
4.40063417649089
4.45302267859198
4.50541118069306
4.55779968279414
4.61018818489522
4.6625766869963
4.71496518909739
4.76735369119847
4.81974219329955
4.87213069540063
4.92451919750171
4.9769076996028
5.02929620170388
5.08168470380496
5.13407320590604
5.18646170800712
5.23885021010821
5.29123871220929
5.34362721431037
5.39601571641145
5.44840421851254
5.50079272061362
5.5531812227147
5.60556972481578
5.65795822691686
5.71034672901795
5.76273523111903
5.81512373322011
5.86751223532119
5.91990073742227
5.97228923952336
6.02467774162444
6.07706624372552
6.1294547458266
6.18184324792768
6.23423175002877
6.28662025212985
6.33900875423093
6.39139725633201
6.44378575843309
6.49617426053418
6.54856276263526
6.60095126473634
6.65333976683742
6.7057282689385
6.75811677103959
6.81050527314067
6.86289377524175
6.91528227734283
6.96767077944391
7.020059281545
7.07244778364608
7.12483628574716
7.17722478784824
7.22961328994933
7.28200179205041
7.33439029415149
7.38677879625257
7.43916729835365
7.49155580045474
7.54394430255582
7.5963328046569
7.64872130675798
7.70110980885906
7.75349831096015
7.80588681306123
7.85827531516231
7.91066381726339
7.96305231936447
8.01544082146556
8.06782932356664
8.12021782566772
8.1726063277688
8.22499482986989
8.27738333197097
8.32977183407205
8.38216033617313
8.43454883827421
8.4869373403753
8.53932584247638
8.59171434457746
8.64410284667854
8.69649134877962
8.74887985088071
8.80126835298179
8.85365685508287
8.90604535718395
8.95843385928503
9.01082236138611
9.0632108634872
9.11559936558828
9.16798786768936
9.22037636979044
9.27276487189152
9.32515337399261
9.37754187609369
9.42993037819477
9.48231888029585
9.53470738239694
9.58709588449802
9.6394843865991
9.69187288870018
9.74426139080126
9.79664989290235
9.84903839500343
9.90142689710451
9.95381539920559
10.0062039013067
10.0585924034078
10.1109809055088
10.1633694076099
10.215757909711
10.2681464118121
10.3205349139132
10.3729234160142
10.4253119181153
10.4777004202164
10.5300889223175
10.5824774244186
10.6348659265197
10.6872544286207
10.7396429307218
10.7920314328229
10.844419934924
10.8968084370251
10.9491969391262
11.0015854412272
11.0539739433283
11.1063624454294
11.1587509475305
11.2111394496316
11.2635279517326
11.3159164538337
11.3683049559348
11.4206934580359
11.473081960137
11.5254704622381
11.5778589643391
11.6302474664402
11.6826359685413
11.7350244706424
11.7874129727435
11.8398014748445
11.8921899769456
11.9445784790467
11.9969669811478
12.0493554832489
12.10174398535
12.154132487451
12.2065209895521
12.2589094916532
12.3112979937543
12.3636864958554
12.4160749979564
12.4684635000575
12.5208520021586
12.5732405042597
12.6256290063608
12.6780175084619
12.7304060105629
12.782794512664
12.8351830147651
12.8875715168662
12.9399600189673
12.9923485210684
13.0447370231694
13.0971255252705
13.1495140273716
13.2019025294727
13.2542910315738
13.3066795336748
13.3590680357759
13.411456537877
13.4638450399781
13.5162335420792
13.5686220441803
13.6210105462813
13.6733990483824
13.7257875504835
13.7781760525846
13.8305645546857
13.8829530567867
13.9353415588878
13.9877300609889
14.04011856309
14.0925070651911
14.1448955672922
14.1972840693932
14.2496725714943
14.3020610735954
14.3544495756965
14.4068380777976
14.4592265798987
14.5116150819997
14.5640035841008
14.6163920862019
14.668780588303
14.7211690904041
14.7735575925051
14.8259460946062
14.8783345967073
14.9307230988084
14.9831116009095
15.0355001030106
15.0878886051116
15.1402771072127
15.1926656093138
15.2450541114149
15.297442613516
15.349831115617
15.4022196177181
15.4546081198192
15.5069966219203
15.5593851240214
15.6117736261225
15.6641621282235
15.7165506303246
15.7689391324257
15.8213276345268
15.8737161366279
15.9261046387289
15.97849314083
16.0308816429311
16.0832701450322
16.1356586471333
16.1880471492344
16.2404356513354
16.2928241534365
16.3452126555376
16.3976011576387
16.4499896597398
16.5023781618408
16.5547666639419
16.607155166043
16.6595436681441
16.7119321702452
16.7643206723463
16.8167091744473
16.8690976765484
16.9214861786495
16.9738746807506
17.0262631828517
17.0786516849528
17.1310401870538
17.1834286891549
17.235817191256
17.2882056933571
17.3405941954582
17.3929826975592
17.4453711996603
17.4977597017614
17.5501482038625
17.6025367059636
17.6549252080647
17.7073137101657
17.7597022122668
17.8120907143679
17.864479216469
17.9168677185701
17.9692562206711
18.0216447227722
18.0740332248733
18.1264217269744
18.1788102290755
18.2311987311766
18.2835872332776
18.3359757353787
18.3883642374798
18.4407527395809
18.493141241682
18.545529743783
18.5979182458841
18.6503067479852
18.7026952500863
18.7550837521874
18.8074722542885
18.8598607563895
18.9122492584906
18.9646377605917
19.0170262626928
19.0694147647939
19.121803266895
19.174191768996
19.2265802710971
19.2789687731982
19.3313572752993
19.3837457774004
19.4361342795014
19.4885227816025
19.5409112837036
19.5932997858047
19.6456882879058
19.6980767900069
19.7504652921079
19.802853794209
19.8552422963101
19.9076307984112
19.9600193005123
20.0124078026133
20.0647963047144
20.1171848068155
20.1695733089166
20.2219618110177
20.2743503131188
20.3267388152198
20.3791273173209
20.431515819422
20.4839043215231
20.5362928236242
20.5886813257253
20.6410698278263
20.6934583299274
20.7458468320285
20.7982353341296
20.8506238362307
20.9030123383317
20.9554008404328
21.0077893425339
21.060177844635
21.1125663467361
21.1649548488372
21.2173433509382
21.2697318530393
21.3221203551404
21.3745088572415
21.4268973593426
21.4792858614436
21.5316743635447
21.5840628656458
21.6364513677469
21.688839869848
21.7412283719491
21.7936168740501
21.8460053761512
21.8983938782523
21.9507823803534
22.0031708824545
22.0555593845556
22.1079478866566
22.1603363887577
22.2127248908588
22.2651133929599
22.317501895061
22.369890397162
22.4222788992631
22.4746674013642
22.5270559034653
22.5794444055664
22.6318329076675
22.6842214097685
22.7366099118696
22.7889984139707
22.8413869160718
22.8937754181729
22.9461639202739
22.998552422375
23.0509409244761
23.1033294265772
23.1557179286783
23.2081064307794
23.2604949328804
23.3128834349815
23.3652719370826
23.4176604391837
23.4700489412848
23.5224374433859
23.5748259454869
23.627214447588
23.6796029496891
23.7319914517902
23.7843799538913
23.8367684559923
23.8891569580934
23.9415454601945
23.9939339622956
24.0463224643967
24.0987109664977
24.1510994685988
24.2034879706999
24.255876472801
24.3082649749021
24.3606534770032
24.4130419791042
24.4654304812053
24.5178189833064
24.5702074854075
24.6225959875086
24.6749844896097
24.7273729917107
24.7797614938118
24.8321499959129
24.884538498014
24.9369270001151
24.9893155022161
25.0417040043172
25.0940925064183
25.1464810085194
25.1988695106205
25.2512580127216
25.3036465148226
25.3560350169237
25.4084235190248
25.4608120211259
25.513200523227
25.5655890253281
25.6179775274291
25.6703660295302
25.7227545316313
25.7751430337324
25.8275315358335
25.8799200379345
25.9323085400356
25.9846970421367
26.0370855442378
26.0894740463389
26.14186254844
26.194251050541
26.2466395526421
26.2990280547432
26.3514165568443
26.4038050589454
26.4561935610464
26.5085820631475
26.5609705652486
26.6133590673497
26.6657475694508
26.7181360715519
26.7705245736529
26.822913075754
26.8753015778551
26.9276900799562
26.9800785820573
27.0324670841583
27.0848555862594
27.1372440883605
27.1896325904616
27.2420210925627
27.2944095946638
27.3467980967648
27.3991865988659
27.451575100967
27.5039636030681
27.5563521051692
27.6087406072702
27.6611291093713
27.7135176114724
27.7659061135735
27.8182946156746
27.8706831177757
27.9230716198767
27.9754601219778
28.0278486240789
28.08023712618
28.1326256282811
28.1850141303822
28.2374026324832
28.2897911345843
28.3421796366854
28.3945681387865
28.4469566408876
28.4993451429886
28.5517336450897
28.6041221471908
28.6565106492919
28.708899151393
28.7612876534941
28.8136761555951
28.8660646576962
28.9184531597973
28.9708416618984
29.0232301639995
29.0756186661005
29.1280071682016
29.1803956703027
29.2327841724038
29.2851726745049
29.337561176606
29.389949678707
29.4423381808081
29.4947266829092
29.5471151850103
29.5995036871114
29.6518921892124
29.7042806913135
29.7566691934146
29.8090576955157
29.8614461976168
29.9138346997179
29.9662232018189
30.01861170392
30.0710002060211
30.1233887081222
30.1757772102233
30.2281657123244
30.2805542144254
30.3329427165265
30.3853312186276
30.4377197207287
30.4901082228298
30.5424967249308
30.5948852270319
30.647273729133
30.6996622312341
30.7520507333352
30.8044392354363
30.8568277375373
30.9092162396384
30.9616047417395
31.0139932438406
31.0663817459417
31.1187702480428
31.1711587501438
31.2235472522449
31.275935754346
31.3283242564471
31.3807127585482
31.4331012606492
31.4854897627503
31.5378782648514
31.5902667669525
31.6426552690536
31.6950437711547
31.7474322732557
31.7998207753568
31.8522092774579
31.904597779559
31.9569862816601
32.0093747837611
32.0617632858622
32.1141517879633
32.1665402900644
32.2189287921655
32.2713172942666
32.3237057963676
32.3760942984687
32.4284828005698
32.4808713026709
32.533259804772
32.585648306873
32.6380368089741
32.6904253110752
32.7428138131763
32.7952023152774
32.8475908173785
32.8999793194795
32.9523678215806
33.0047563236817
33.0571448257828
33.1095333278839
33.1619218299849
33.214310332086
33.2666988341871
33.3190873362882
33.3714758383893
33.4238643404904
33.4762528425914
33.5286413446925
33.5810298467936
33.6334183488947
33.6858068509958
33.7381953530968
33.7905838551979
33.842972357299
33.8953608594001
33.9477493615012
34.0001378636023
34.0525263657033
34.1049148678044
34.1573033699055
34.2096918720066
34.2620803741077
34.3144688762088
34.3668573783098
34.4192458804109
34.471634382512
34.5240228846131
34.5764113867142
34.6287998888153
34.6811883909163
34.7335768930174
34.7859653951185
34.8383538972196
34.8907423993207
34.9431309014217
34.9955194035228
35.0479079056239
35.100296407725
35.1526849098261
35.2050734119271
35.2574619140282
35.3098504161293
35.3622389182304
35.4146274203315
35.4670159224326
35.5194044245336
35.5717929266347
35.6241814287358
35.6765699308369
35.728958432938
35.781346935039
35.8337354371401
35.8861239392412
35.9385124413423
35.9909009434434
36.0432894455445
36.0956779476455
36.1480664497466
36.2004549518477
36.2528434539488
36.3052319560499
36.357620458151
36.410008960252
36.4623974623531
36.5147859644542
36.5671744665553
36.6195629686564
36.6719514707574
36.7243399728585
36.7767284749596
36.8291169770607
36.8815054791618
36.9338939812629
36.9862824833639
37.038670985465
37.0910594875661
37.1434479896672
37.1958364917683
37.2482249938693
37.3006134959704
37.3530019980715
37.4053905001726
37.4577790022737
37.5101675043748
37.5625560064758
37.6149445085769
37.667333010678
37.7197215127791
37.7721100148802
37.8244985169813
37.8768870190823
37.9292755211834
37.9816640232845
38.0340525253856
38.0864410274867
38.1388295295877
38.1912180316888
38.2436065337899
38.295995035891
38.3483835379921
38.4007720400932
38.4531605421942
38.5055490442953
38.5579375463964
38.6103260484975
38.6627145505986
38.7151030526996
38.7674915548007
38.8198800569018
38.8722685590029
38.924657061104
38.9770455632051
39.0294340653061
39.0818225674072
39.1342110695083
39.1865995716094
39.2389880737105
39.2913765758115
39.3437650779126
39.3961535800137
39.4485420821148
39.5009305842159
39.553319086317
39.605707588418
39.6580960905191
39.7104845926202
39.7628730947213
39.8152615968224
39.8676500989234
39.9200386010245
39.9724271031256
40.0248156052267
40.0772041073278
40.1295926094289
40.1819811115299
40.234369613631
40.2867581157321
40.3391466178332
40.3915351199343
40.4439236220354
40.4963121241364
40.5487006262375
40.6010891283386
40.6534776304397
40.7058661325408
40.7582546346419
40.8106431367429
40.863031638844
40.9154201409451
40.9678086430462
41.0201971451473
41.0725856472483
41.1249741493494
41.1773626514505
41.2297511535516
41.2821396556527
41.3345281577538
41.3869166598548
41.4393051619559
41.491693664057
41.5440821661581
41.5964706682592
41.6488591703602
41.7012476724613
41.7536361745624
41.8060246766635
41.8584131787646
41.9108016808657
41.9631901829667
42.0155786850678
42.0679671871689
42.12035568927
42.1727441913711
42.2251326934721
42.2775211955732
42.3299096976743
42.3822981997754
42.4346867018765
42.4870752039776
42.5394637060786
42.5918522081797
42.6442407102808
42.6966292123819
42.749017714483
42.801406216584
42.8537947186851
42.9061832207862
42.9585717228873
43.0109602249884
43.0633487270895
43.1157372291905
43.1681257312916
43.2205142333927
43.2729027354938
43.3252912375949
43.3776797396959
43.430068241797
43.4824567438981
43.5348452459992
43.5872337481003
43.6396222502014
43.6920107523024
43.7443992544035
43.7967877565046
43.8491762586057
43.9015647607068
43.9539532628079
44.0063417649089
44.05873026701
44.1111187691111
44.1635072712122
44.2158957733133
44.2682842754143
44.3206727775154
44.3730612796165
44.4254497817176
44.4778382838187
44.5302267859198
44.5826152880208
44.6350037901219
44.687392292223
44.7397807943241
44.7921692964252
44.8445577985262
44.8969463006273
44.9493348027284
45.0017233048295
45.0541118069306
45.1065003090317
45.1588888111327
45.2112773132338
45.2636658153349
45.316054317436
45.3684428195371
45.4208313216381
45.4732198237392
45.5256083258403
45.5779968279414
45.6303853300425
45.6827738321436
45.7351623342446
45.7875508363457
45.8399393384468
45.8923278405479
45.944716342649
45.9971048447501
46.0494933468511
46.1018818489522
46.1542703510533
46.2066588531544
46.2590473552555
46.3114358573565
46.3638243594576
46.4162128615587
46.4686013636598
46.5209898657609
46.573378367862
46.625766869963
46.6781553720641
46.7305438741652
46.7829323762663
46.8353208783674
46.8877093804685
46.9400978825695
46.9924863846706
47.0448748867717
47.0972633888728
47.1496518909739
47.2020403930749
47.254428895176
47.3068173972771
47.3592058993782
47.4115944014793
47.4639829035804
47.5163714056814
47.5687599077825
47.6211484098836
47.6735369119847
47.7259254140858
47.7783139161868
47.8307024182879
47.883090920389
47.9354794224901
47.9878679245912
48.0402564266923
48.0926449287933
48.1450334308944
48.1974219329955
48.2498104350966
48.3021989371977
48.3545874392987
48.4069759413998
48.4593644435009
48.511752945602
48.5641414477031
48.6165299498042
48.6689184519052
48.7213069540063
48.7736954561074
48.8260839582085
48.8784724603096
48.9308609624106
48.9832494645117
49.0356379666128
49.0880264687139
49.140414970815
49.1928034729161
49.2451919750171
49.2975804771182
49.3499689792193
49.4023574813204
49.4547459834215
49.5071344855226
49.5595229876236
49.6119114897247
49.6642999918258
49.7166884939269
49.769076996028
49.821465498129
49.8738540002301
49.9262425023312
49.9786310044323
50.0310195065334
50.0834080086345
50.1357965107355
50.1881850128366
50.2405735149377
50.2929620170388
50.3453505191399
50.397739021241
50.450127523342
50.5025160254431
50.5549045275442
50.6072930296453
50.6596815317464
50.7120700338474
50.7644585359485
50.8168470380496
50.8692355401507
50.9216240422518
50.9740125443529
51.0264010464539
51.078789548555
51.1311780506561
51.1835665527572
51.2359550548583
51.2883435569593
51.3407320590604
51.3931205611615
51.4455090632626
51.4978975653637
51.5502860674648
51.6026745695658
51.6550630716669
51.707451573768
51.7598400758691
51.8122285779702
51.8646170800712
51.9170055821723
51.9693940842734
52.0217825863745
52.0741710884756
52.1265595905767
52.1789480926777
52.2313365947788
52.2837250968799
52.336113598981
52.3885021010821
52.4408906031831
52.4932791052842
52.5456676073853
52.5980561094864
52.6504446115875
52.7028331136886
52.7552216157896
52.8076101178907
52.8599986199918
52.9123871220929
52.964775624194
53.017164126295
53.0695526283961
53.1219411304972
53.1743296325983
53.2267181346994
53.2791066368005
53.3314951389015
53.3838836410026
53.4362721431037
53.4886606452048
53.5410491473059
53.593437649407
53.645826151508
53.6982146536091
53.7506031557102
53.8029916578113
53.8553801599124
53.9077686620134
53.9601571641145
54.0125456662156
54.0649341683167
54.1173226704178
54.1697111725189
54.2220996746199
54.274488176721
54.3268766788221
54.3792651809232
54.4316536830243
54.4840421851253
54.5364306872264
54.5888191893275
54.6412076914286
54.6935961935297
54.7459846956308
54.7983731977318
54.8507616998329
54.903150201934
54.9555387040351
55.0079272061362
55.0603157082372
55.1127042103383
55.1650927124394
55.2174812145405
55.2698697166416
55.3222582187427
55.3746467208437
55.4270352229448
55.4794237250459
55.531812227147
55.5842007292481
55.6365892313492
55.6889777334502
55.7413662355513
55.7937547376524
55.8461432397535
55.8985317418546
55.9509202439557
56.0033087460567
56.0556972481578
56.1080857502589
56.16047425236
56.2128627544611
56.2652512565621
56.3176397586632
56.3700282607643
56.4224167628654
56.4748052649665
56.5271937670676
56.5795822691686
56.6319707712697
56.6843592733708
56.7367477754719
56.789136277573
56.841524779674
56.8939132817751
56.9463017838762
56.9986902859773
57.0510787880784
57.1034672901795
57.1558557922805
57.2082442943816
57.2606327964827
57.3130212985838
57.3654098006849
57.4177983027859
57.470186804887
57.5225753069881
57.5749638090892
57.6273523111903
57.6797408132914
57.7321293153924
57.7845178174935
57.8369063195946
57.8892948216957
57.9416833237968
57.9940718258979
58.0464603279989
58.0988488301
58.1512373322011
58.2036258343022
58.2560143364033
58.3084028385043
58.3607913406054
58.4131798427065
58.4655683448076
58.5179568469087
58.5703453490097
58.6227338511108
58.6751223532119
58.727510855313
58.7798993574141
58.8322878595152
58.8846763616162
58.9370648637173
58.9894533658184
59.0418418679195
59.0942303700206
59.1466188721216
59.1990073742227
59.2513958763238
59.3037843784249
59.356172880526
59.4085613826271
59.4609498847281
59.5133383868292
59.5657268889303
59.6181153910314
59.6705038931325
59.7228923952336
59.7752808973346
59.8276693994357
59.8800579015368
59.9324464036379
59.984834905739
60.03722340784
60.0896119099411
60.1420004120422
60.1943889141433
60.2467774162444
60.2991659183455
60.3515544204465
60.4039429225476
60.4563314246487
60.5087199267498
60.5611084288509
60.6134969309519
60.665885433053
60.7182739351541
60.7706624372552
60.8230509393563
60.8754394414574
60.9278279435584
60.9802164456595
61.0326049477606
61.0849934498617
61.1373819519628
61.1897704540639
61.2421589561649
61.294547458266
61.3469359603671
61.3993244624682
61.4517129645693
61.5041014666703
61.5564899687714
61.6088784708725
61.6612669729736
61.7136554750747
61.7660439771758
61.8184324792768
61.8708209813779
61.923209483479
61.9755979855801
62.0279864876812
62.0803749897822
62.1327634918833
62.1851519939844
62.2375404960855
62.2899289981866
62.3423175002877
62.3947060023887
62.4470945044898
62.4994830065909
62.551871508692
62.6042600107931
62.6566485128942
62.7090370149952
62.7614255170963
62.8138140191974
62.8662025212985
62.9185910233996
62.9709795255006
63.0233680276017
63.0757565297028
63.1281450318039
63.180533533905
63.2329220360061
63.2853105381071
63.3376990402082
63.3900875423093
63.4424760444104
63.4948645465115
63.5472530486126
63.5996415507136
63.6520300528147
63.7044185549158
63.7568070570169
63.809195559118
63.861584061219
63.9139725633201
63.9663610654212
64.0187495675223
64.0711380696234
64.1235265717245
64.1759150738255
64.2283035759266
64.2806920780277
64.3330805801288
64.3854690822299
64.4378575843309
64.490246086432
64.5426345885331
64.5950230906342
64.6474115927353
64.6998000948364
64.7521885969374
64.8045770990385
64.8569656011396
64.9093541032407
64.9617426053418
65.0141311074428
65.0665196095439
65.118908111645
65.1712966137461
65.2236851158472
65.2760736179482
65.3284621200493
65.3808506221504
65.4332391242515
65.4856276263526
65.5380161284537
65.5904046305547
65.6427931326558
65.6951816347569
65.747570136858
65.7999586389591
65.8523471410602
65.9047356431612
65.9571241452623
66.0095126473634
66.0619011494645
66.1142896515656
66.1666781536667
66.2190666557677
66.2714551578688
66.3238436599699
66.376232162071
66.4286206641721
66.4810091662731
66.5333976683742
66.5857861704753
66.6381746725764
66.6905631746775
66.7429516767785
66.7953401788796
66.8477286809807
66.9001171830818
66.9525056851829
67.004894187284
67.057282689385
67.1096711914861
67.1620596935872
67.2144481956883
67.2668366977894
67.3192251998905
67.3716137019915
67.4240022040926
67.4763907061937
67.5287792082948
67.5811677103959
67.6335562124969
67.685944714598
67.7383332166991
67.7907217188002
67.8431102209013
67.8954987230024
67.9478872251034
68.0002757272045
68.0526642293056
68.1050527314067
68.1574412335078
68.2098297356088
68.2622182377099
68.314606739811
68.3669952419121
68.4193837440132
68.4717722461143
68.5241607482154
68.5765492503164
68.6289377524175
68.6813262545186
68.7337147566197
68.7861032587208
68.8384917608218
68.8908802629229
68.943268765024
68.9956572671251
69.0480457692262
69.1004342713272
69.1528227734283
69.2052112755294
69.2575997776305
69.3099882797316
69.3623767818327
69.4147652839337
69.4671537860348
69.5195422881359
69.571930790237
69.6243192923381
69.6767077944392
69.7290962965402
69.7814847986413
69.8338733007424
69.8862618028435
69.9386503049446
69.9910388070456
70.0434273091467
70.0958158112478
70.1482043133489
70.20059281545
70.2529813175511
70.3053698196521
70.3577583217532
70.4101468238543
70.4625353259554
70.5149238280565
70.5673123301575
70.6197008322586
70.6720893343597
70.7244778364608
70.7768663385619
70.829254840663
70.881643342764
70.9340318448651
70.9864203469662
71.0388088490673
71.0911973511684
71.1435858532694
71.1959743553705
71.2483628574716
71.3007513595727
71.3531398616738
71.4055283637749
71.4579168658759
71.510305367977
71.5626938700781
71.6150823721792
71.6674708742803
71.7198593763814
71.7722478784824
71.8246363805835
71.8770248826846
71.9294133847857
71.9818018868868
72.0341903889878
72.0865788910889
72.13896739319
72.1913558952911
72.2437443973922
72.2961328994932
72.3485214015943
72.4009099036954
72.4532984057965
72.5056869078976
72.5580754099987
72.6104639120997
72.6628524142008
72.7152409163019
72.767629418403
72.8200179205041
72.8724064226052
72.9247949247062
72.9771834268073
73.0295719289084
73.0819604310095
73.1343489331106
73.1867374352116
73.2391259373127
73.2915144394138
73.3439029415149
73.396291443616
73.4486799457171
73.5010684478181
73.5534569499192
73.6058454520203
73.6582339541214
73.7106224562225
73.7630109583235
73.8153994604246
73.8677879625257
73.9201764646268
73.9725649667279
74.024953468829
74.07734197093
74.1297304730311
74.1821189751322
74.2345074772333
74.2868959793344
74.3392844814355
74.3916729835365
74.4440614856376
74.4964499877387
74.5488384898398
74.6012269919409
74.6536154940419
74.706003996143
74.7583924982441
74.8107810003452
74.8631695024463
74.9155580045473
74.9679465066484
75.0203350087495
75.0727235108506
75.1251120129517
75.1775005150528
75.2298890171539
75.2822775192549
75.334666021356
75.3870545234571
75.4394430255582
75.4918315276593
75.5442200297603
75.5966085318614
75.6489970339625
75.7013855360636
75.7537740381647
75.8061625402658
75.8585510423668
75.9109395444679
75.963328046569
76.0157165486701
76.0681050507712
76.1204935528722
76.1728820549733
76.2252705570744
76.2776590591755
76.3300475612766
76.3824360633777
76.4348245654787
76.4872130675798
76.5396015696809
76.591990071782
76.6443785738831
76.6967670759841
76.7491555780852
76.8015440801863
76.8539325822874
76.9063210843885
76.9587095864896
77.0110980885906
77.0634865906917
77.1158750927928
77.1682635948939
77.220652096995
77.273040599096
77.3254291011971
77.3778176032982
77.4302061053993
77.4825946075004
77.5349831096015
77.5873716117025
77.6397601138036
77.6921486159047
77.7445371180058
77.7969256201069
77.8493141222079
77.901702624309
77.9540911264101
78.0064796285112
78.0588681306123
78.1112566327134
78.1636451348144
78.2160336369155
78.2684221390166
78.3208106411177
78.3731991432188
78.4255876453199
78.4779761474209
78.530364649522
78.5827531516231
78.6351416537242
78.6875301558253
78.7399186579263
78.7923071600274
78.8446956621285
78.8970841642296
78.9494726663307
79.0018611684318
79.0542496705328
79.1066381726339
79.159026674735
79.2114151768361
79.2638036789372
79.3161921810382
79.3685806831393
79.4209691852404
79.4733576873415
79.5257461894426
79.5781346915437
79.6305231936447
79.6829116957458
79.7353001978469
79.787688699948
79.8400772020491
79.8924657041502
79.9448542062512
79.9972427083523
80.0496312104534
80.1020197125545
80.1544082146556
80.2067967167566
80.2591852188577
80.3115737209588
80.3639622230599
80.416350725161
80.468739227262
80.5211277293631
80.5735162314642
80.6259047335653
80.6782932356664
80.7306817377675
80.7830702398686
80.8354587419696
80.8878472440707
80.9402357461718
80.9926242482729
81.045012750374
81.097401252475
81.1497897545761
81.2021782566772
81.2545667587783
81.3069552608794
81.3593437629805
81.4117322650815
81.4641207671826
81.5165092692837
81.5688977713848
81.6212862734859
81.6736747755869
81.726063277688
81.7784517797891
81.8308402818902
81.8832287839913
81.9356172860924
81.9880057881934
82.0403942902945
82.0927827923956
82.1451712944967
82.1975597965978
82.2499482986989
82.3023368007999
82.354725302901
82.4071138050021
82.4595023071032
82.5118908092043
82.5642793113053
82.6166678134064
82.6690563155075
82.7214448176086
82.7738333197097
82.8262218218107
82.8786103239118
82.9309988260129
82.983387328114
83.0357758302151
83.0881643323162
83.1405528344172
83.1929413365183
83.2453298386194
83.2977183407205
83.3501068428216
83.4024953449226
83.4548838470237
83.5072723491248
83.5596608512259
83.612049353327
83.6644378554281
83.7168263575291
83.7692148596302
83.8216033617313
83.8739918638324
83.9263803659335
83.9787688680345
84.0311573701356
84.0835458722367
84.1359343743378
84.1883228764389
84.24071137854
84.293099880641
84.3454883827421
84.3978768848432
84.4502653869443
84.5026538890454
84.5550423911465
84.6074308932475
84.6598193953486
84.7122078974497
84.7645963995508
84.8169849016519
84.8693734037529
84.921761905854
84.9741504079551
85.0265389100562
85.0789274121573
85.1313159142584
85.1837044163594
85.2360929184605
85.2884814205616
85.3408699226627
85.3932584247638
85.4456469268649
85.4980354289659
85.550423931067
85.6028124331681
85.6552009352692
85.7075894373703
85.7599779394713
85.8123664415724
85.8647549436735
85.9171434457746
85.9695319478757
86.0219204499767
86.0743089520778
86.1266974541789
86.17908595628
86.2314744583811
86.2838629604822
86.3362514625832
86.3886399646843
86.4410284667854
86.4934169688865
86.5458054709876
86.5981939730887
86.6505824751897
86.7029709772908
86.7553594793919
86.807747981493
86.8601364835941
86.9125249856951
86.9649134877962
87.0173019898973
87.0696904919984
87.1220789940995
87.1744674962006
87.2268559983016
87.2792445004027
87.3316330025038
87.3840215046049
87.436410006706
87.4887985088071
87.5411870109081
87.5935755130092
87.6459640151103
87.6983525172114
87.7507410193125
87.8031295214136
87.8555180235146
87.9079065256157
87.9602950277168
88.0126835298179
88.065072031919
88.11746053402
88.1698490361211
88.2222375382222
88.2746260403233
88.3270145424244
88.3794030445254
88.4317915466265
88.4841800487276
88.5365685508287
88.5889570529298
88.6413455550309
88.6937340571319
88.746122559233
88.7985110613341
88.8508995634352
88.9032880655363
88.9556765676374
89.0080650697384
89.0604535718395
89.1128420739406
89.1652305760417
89.2176190781428
89.2700075802438
89.3223960823449
89.374784584446
89.4271730865471
89.4795615886482
89.5319500907492
89.5843385928503
89.6367270949514
89.6891155970525
89.7415040991536
89.7938926012547
89.8462811033557
89.8986696054568
89.9510581075579
90.003446609659
90.0558351117601
90.1082236138612
90.1606121159622
90.2130006180633
90.2653891201644
90.3177776222655
90.3701661243666
90.4225546264676
90.4749431285687
90.5273316306698
90.5797201327709
90.632108634872
90.6844971369731
90.7368856390741
90.7892741411752
90.8416626432763
90.8940511453774
90.9464396474785
90.9988281495796
91.0512166516806
91.1036051537817
91.1559936558828
91.2083821579839
91.260770660085
91.313159162186
91.3655476642871
91.4179361663882
91.4703246684893
91.5227131705904
91.5751016726914
91.6274901747925
91.6798786768936
91.7322671789947
91.7846556810958
91.8370441831969
91.8894326852979
91.941821187399
91.9942096895001
92.0465981916012
92.0989866937023
92.1513751958034
92.2037636979044
92.2561522000055
92.3085407021066
92.3609292042077
92.4133177063088
92.4657062084098
92.5180947105109
92.570483212612
92.6228717147131
92.6752602168142
92.7276487189153
92.7800372210163
92.8324257231174
92.8848142252185
92.9372027273196
92.9895912294207
93.0419797315217
93.0943682336228
93.1467567357239
93.199145237825
93.2515337399261
93.3039222420272
93.3563107441283
93.4086992462293
93.4610877483304
93.5134762504315
93.5658647525326
93.6182532546337
93.6706417567347
93.7230302588358
93.7754187609369
93.827807263038
93.8801957651391
93.9325842672401
93.9849727693412
94.0373612714423
94.0897497735434
94.1421382756445
94.1945267777456
94.2469152798466
94.2993037819477
94.3516922840488
94.4040807861499
94.456469288251
94.5088577903521
94.5612462924531
94.6136347945542
94.6660232966553
94.7184117987564
94.7708003008575
94.8231888029585
94.8755773050596
94.9279658071607
94.9803543092618
95.0327428113629
95.085131313464
95.137519815565
95.1899083176661
95.2422968197672
95.2946853218683
95.3470738239694
95.3994623260704
95.4518508281715
95.5042393302726
95.5566278323737
95.6090163344748
95.6614048365759
95.7137933386769
95.766181840778
95.8185703428791
95.8709588449802
95.9233473470813
95.9757358491823
96.0281243512834
96.0805128533845
96.1329013554856
96.1852898575867
96.2376783596877
96.2900668617888
96.3424553638899
96.394843865991
96.4472323680921
96.4996208701932
96.5520093722943
96.6043978743953
96.6567863764964
96.7091748785975
96.7615633806986
96.8139518827997
96.8663403849007
96.9187288870018
96.9711173891029
97.023505891204
97.0758943933051
97.1282828954061
97.1806713975072
97.2330598996083
97.2854484017094
97.3378369038105
97.3902254059116
97.4426139080126
97.4950024101137
97.5473909122148
97.5997794143159
97.652167916417
97.7045564185181
97.7569449206191
97.8093334227202
97.8617219248213
97.9141104269224
97.9664989290235
98.0188874311245
98.0712759332256
98.1236644353267
98.1760529374278
98.2284414395289
98.28082994163
98.333218443731
98.3856069458321
98.4379954479332
98.4903839500343
98.5427724521354
98.5951609542364
98.6475494563375
98.6999379584386
98.7523264605397
98.8047149626408
98.8571034647419

Radius_Low_Absorbent
100	100	100	100	100	100	100	100	100	100
99.9999933719717	99.9999933050219	99.9999930958039	99.9999927164524	99.99999210949	99.9999911626287	99.9999896437054	99.9999870038652	99.999981588808	99.9999651156303
99.9999798954887	99.9999796924186	99.9999790578254	99.9999779071922	99.9999760661868	99.9999731942376	99.9999685872008	99.9999605804609	99.9999441569436	99.9998941995435
99.9999593431323	99.9999589324805	99.9999576491961	99.9999553223736	99.999951599489	99.9999457918666	99.9999364756715	99.9999202850177	99.999887076003	99.9997860671667
99.9999314802805	99.9999307882223	99.9999286255453	99.9999247042375	99.9999184302248	99.9999086429629	99.9998929430742	99.9998656587343	99.9998096979631	99.9996394957504
99.9998968241639	99.999895782106	99.9998925256829	99.9998866212392	99.9998771742916	99.9998624374563	99.9998387981654	99.9997977171353	99.9997134635982	99.9994572195401
99.9998543919217	99.9998529213498	99.9998483258226	99.9998399933782	99.9998266617546	99.9998058651383	99.9997725057825	99.9997145343737	99.9995956466924	99.9992340760153
99.9998039268544	99.9998019466692	99.9997957585997	99.9997845386428	99.9997665871772	99.9997385840566	99.9996936654786	99.9996156086754	99.9994555386336	99.9989687260977
99.9997451641793	99.999742590615	99.9997345482309	99.9997199661418	99.9996966355067	99.9996602414954	99.9996018642139	99.9995004225289	99.9992924085643	99.9986597882192
99.9996778307886	99.9996745773294	99.9996644102624	99.9996459758386	99.9996164817859	99.9995704736534	99.999496675979	99.999368442211	99.9991055026877	99.9983058370935
99.9996025380139	99.9995985243282	99.9995859815327	99.9995632396121	99.9995268539695	99.999470095999	99.9993790567451	99.9992208683121	99.9988965241727	99.9979101025905
99.9995181328075	99.9995132669256	99.9994980609835	99.9994704904569	99.9994263795495	99.9993575714741	99.9992472056117	99.9990554418113	99.9986622748906	99.9974665266906
99.9994243165607	99.9994185035065	99.9994003376015	99.9993674003233	99.9993147032315	99.9992325023236	99.9991006568496	99.9988715793079	99.9984019306362	99.9969735504464
99.9993207813311	99.9993139230284	99.9992924906524	99.9992536309082	99.9991914586172	99.9990944783646	99.9989389301925	99.9986686792069	99.9981146414471	99.9964295659767
99.9992072095647	99.9991992047405	99.9991741893913	99.9991288333504	99.9990562678743	99.9989430766181	99.998761530404	99.9984461211748	99.997799530828	99.9958329150284
99.9990843229159	99.9990750775982	99.9990461855841	99.9989938007802	99.9989099903331	99.9987792597388	99.998569586067	99.9982053226643	99.9974586091767	99.9951874092836
99.9989507701927	99.9989401767719	99.9989070717789	99.9988470484675	99.998751017635	99.9986012265602	99.9983609869011	99.9979436366335	99.9970881286304	99.9944859486092
99.998806204418	99.9987941517921	99.9987564865863	99.9986881952291	99.9985789369449	99.9984085149309	99.9981351918442	99.9976603853666	99.9966871313732	99.9937267207128
99.9986502678482	99.9986366413143	99.9985940574039	99.9985168480545	99.9983933226199	99.9982006483663	99.9978916430649	99.9973548701419	99.996254629865	99.9929078568892
99.9984825916553	99.9984672727984	99.9984194000845	99.998332601757	99.9981937358307	99.9979771356252	99.9976297654663	99.9970263706097	99.9957896059564	99.9920274303641
99.9983040266784	99.9982869056918	99.9982334009702	99.9981363914493	99.9979811897469	99.9977391117202	99.9973508897516	99.996676558064	99.995294429726	99.9910899343313
99.9981129912815	99.9980939423959	99.9980344125709	99.9979264791849	99.9977538017135	99.9974844683276	99.9970525458185	99.9963023340916	99.9947647138851	99.9900870567211
99.9979090827238	99.9978879761164	99.9978220154189	99.997702422523	99.997511092559	99.99721266906	99.9967341057456	99.9959029121591	99.9941993465343	99.9890166932475
99.9976918858582	99.9976685875286	99.9975957771256	99.9974637653948	99.9972525683535	99.9969231610145	99.9963949222858	99.9954774815156	99.9935971815193	99.9878766746188
99.99746236892	99.9974367546642	99.9973567063287	99.9972115719396	99.9969793820688	99.9966172358367	99.9960365098103	99.9950279440877	99.992960915757	99.9866721134389
99.9972187414181	99.9971906689617	99.9971029379874	99.9969438747162	99.9966894024514	99.9962925068224	99.9956560720905	99.994550792325	99.9922855823934	99.9853935991771
99.9969605502653	99.9969298727745	99.9968340001978	99.9966601759778	99.996382090439	99.9959483705617	99.9952529027733	99.9940451414067	99.9915699303923	99.984038763907
99.9966873284982	99.9966538944404	99.9965494066043	99.996359962735	99.9960568904626	99.9955842051726	99.9948262738866	99.993510079417	99.9908126704023	99.9826051669744
99.9963985948734	99.9963622478734	99.9962486559779	99.9960427063109	99.9957132299659	99.9951993697623	99.9943754352083	99.9929446665563	99.9900124736294	99.9810902928848
99.996095488479	99.9960560836874	99.99593293494	99.9957096586247	99.9953524653837	99.9947953839331	99.9939021683929	99.9923511403594	99.9891725126709	99.9795001556537
99.9957759175585	99.9957332890151	99.9956000646406	99.9953585211969	99.9949721068681	99.9943694594225	99.9934032067615	99.9917254030566	99.9882869846347	99.9778237599928
99.9954393572205	99.9953933336839	99.9952494983915	99.9949887174036	99.9945715299411	99.9939208972321	99.9928777320833	99.9910664296132	99.9873544400367	99.9760583618261
99.9950852666145	99.9950356714011	99.9948806728823	99.9945996530894	99.9941500911403	99.9934489771173	99.9923249012583	99.9903731638248	99.9863733853162	99.9742011333957
99.9947130884689	99.9946597392885	99.9944930077005	99.9941907160602	99.9937071274696	99.9929529569725	99.9917438455976	99.9896445174154	99.9853422815487	99.9722491608459
99.9943241612792	99.9942668893851	99.9940878971966	99.9937633773981	99.9932442328323	99.9924346224523	99.9911366586908	99.9888831195862	99.9842648564874	99.9702095102459
99.9939160439524	99.9938546559618	99.9936627986391	99.9933149547637	99.9927585015657	99.9918907196541	99.9904995283125	99.9880841881148	99.9831343377066	99.9680693483045
99.993488129055	99.9934224254736	99.9932170793709	99.9928447808593	99.9922492110026	99.9913204396915	99.9898315076017	99.9872465367472	99.9819490475462	99.9658254983309
99.9930397908163	99.992969565854	99.9927500876365	99.9923521682442	99.9917156166629	99.9907229492651	99.9891316211195	99.9863689434089	99.9807072576926	99.9634746874284
99.9925703846027	99.9924954259838	99.9922611520345	99.9918364087563	99.9911569516273	99.9900973899622	99.9883988640273	99.9854501491766	99.9794071877096	99.9610135437342
99.9920814813743	99.9920015927197	99.9917519090824	99.9912992289737	99.9905750866359	99.9894458575923	99.9876356935458	99.9844932398232	99.9780532125215	99.9584503597347
99.9915702353821	99.9914851915922	99.9912193945427	99.9907375019081	99.9899666343595	99.9887645588618	99.9868376654764	99.9834926402213	99.9766374365075	99.9557701725043
99.9910359444011	99.9909455133116	99.9906628770319	99.9901504561325	99.9893307593696	99.9880525586819	99.9860036852176	99.9824469789362	99.9751579199049	99.9529693082114
99.9904778851592	99.9903818273294	99.9900816032451	99.9895372970991	99.9886666012	99.987308893941	99.9851326253613	99.9813548434093	99.9736126647939	99.9500439825124
99.9898978390291	99.9897959330444	99.9894774288946	99.9888999826465	99.9879762811672	99.9865359411798	99.984227272256	99.9802197326621	99.9720066318478	99.9470035979832
99.989292594873	99.9891845869103	99.9888470091387	99.9882349842835	99.9872559770112	99.9857294200437	99.9832826110281	99.9790353555499	99.9703309111081	99.9438312682008
99.9886613651859	99.9885469934998	99.9881895237732	99.9875414369012	99.9865047518546	99.9848882818977	99.9822974141426	99.9778001740036	99.9685833269294	99.9405228717728
99.9880033389938	99.9878823336803	99.9875041281503	99.9868184496094	99.9857216409004	99.9840114468572	99.9812704174775	99.9765126040899	99.966761638803	99.9370741639811
99.9873176811881	99.9871897639421	99.9867899524856	99.9860651050052	99.9849056506404	99.9830978029012	99.9802003192854	99.9751710147118	99.9648635394953	99.9334807732827
99.9866064781881	99.9864713918176	99.9860491702691	99.9852836961971	99.9840592656633	99.9821501335542	99.9790903830517	99.9737795039764	99.9628948388899	99.9297537114051
99.9858659935728	99.9857234431755	99.9852778895014	99.9844701174898	99.9831780384436	99.9811634582405	99.9779347734538	99.972330751308	99.9608451686442	99.9258733256879
99.9850953186189	99.9849450001505	99.9844751637262	99.9836233706118	99.9822608878977	99.9801365669154	99.9767320739745	99.9708229817371	99.9587120177356	99.9218348579478
99.9842935177117	99.9841351177159	99.9836400184798	99.9827424277505	99.9813067009504	99.9790682137252	99.9754808261687	99.9692543677305	99.9564928007873	99.9176334085458
99.9834596275891	99.9832928229191	99.9827714505026	99.9818262307208	99.9803143316343	99.9779571159983	99.9741795284819	99.9676230277124	99.9541848559489	99.913263932395
99.9825960891687	99.9824205813789	99.9818720025787	99.9808774622529	99.9792866867003	99.9768065302141	99.9728319988728	99.965933755979	99.9517949799304	99.9087393111531
99.9816985592881	99.9815140060974	99.9809371506974	99.9798913499312	99.97821859638	99.9756106669572	99.9714314542755	99.9641780427597	99.9493111195155	99.9040366955336
99.9807659903985	99.9805720389874	99.9799658038118	99.9788667429768	99.9771088144304	99.9743681313111	99.9699762617057	99.9623538417063	99.9467303794041	99.8991505972324
99.9797973041689	99.9795935908698	99.9789568388143	99.9778024567943	99.9759560579857	99.9730774873641	99.9684647401756	99.9604590462836	99.9440497791391	99.8940753658099
99.9787913906256	99.9785775406047	99.9779090996404	99.9766972720269	99.9747590065338	99.9717372570628	99.9668951593505	99.9584914880877	99.9412662506947	99.8888051841407
99.9777511021996	99.9775267694888	99.9768255577631	99.9755543236897	99.973521056883	99.9703512459008	99.9652719808261	99.9564567695521	99.9383877362778	99.8833551044271
99.9766713955892	99.9764361833166	99.9757009598693	99.9743680700078	99.9722362058249	99.9689127310745	99.9635873278229	99.9543450084876	99.9354002380085	99.8776985867441
99.9755510644067	99.9753045635637	99.9745340494753	99.9731371857047	99.9709030181367	99.9674201061204	99.9618393196367	99.9521538479504	99.9323004206638	99.8718293062506
99.974388867061	99.9741306561481	99.973323533431	99.971860306829	99.9695200167101	99.965871717686	99.9600260206541	99.9498808621421	99.9290848515738	99.8657407523959
99.9731835257804	99.9729131704431	99.9720680809029	99.9705360296815	99.9680856813881	99.9642658642274	99.9581454388261	99.9475235544986	99.9257499978781	99.859426223734
99.971938370172	99.9716554697512	99.970771160456	99.9691680137312	99.9666039772305	99.9626069878489	99.956202782074	99.9450884645196	99.9223051300171	99.8529032892015
99.9706475498092	99.970351644592	99.9694266780286	99.9677498302682	99.965067940207	99.9608872896761	99.9541889126709	99.9425641276576	99.9187340077066	99.8461411516369
99.9693096767355	99.969000293045	99.9680331880232	99.9662799545412	99.9634759190569	99.9591049213952	99.9521016666833	99.9399478318003	99.915032792513	99.8391325283772
99.9679233227716	99.967599972562	99.9665892029481	99.9647568176083	99.9618262146584	99.9572579811102	99.9499388174248	99.9372367861331	99.9111975345816	99.8318699241853
99.9664922473658	99.9661544806369	99.9650986391501	99.9631845513678	99.9601233039522	99.9553514843833	99.9477062451046	99.9344383742549	99.907238700759	99.8243731750788
99.965009874526	99.9646571748969	99.9635546467714	99.9615559297878	99.9583593591521	99.9533766649563	99.945393678368	99.9315397089418	99.9031380343671	99.8166076544033
99.9634746536242	99.9631064891121	99.9619556107814	99.9598692493968	99.9565325354305	99.9513314578079	99.9429986994743	99.9285377597525	99.8988912457938	99.8085652199362
99.9618849893416	99.9615008119117	99.9602998696002	99.9581227576222	99.9546409347781	99.9492137383747	99.9405188209435	99.9254294087687	99.8944939215533	99.8002374928585
99.9602392404423	99.9598384855454	99.958585713822	99.9563146514429	99.952682604544	99.9470213209168	99.9379514836399	99.922211448193	99.8899415208306	99.7916158512022
99.9585417866606	99.958123934071	99.9568177059687	99.9544497444981	99.9506627603389	99.9447600485193	99.9353035379028	99.918892479678	99.8852462369997	99.7827234021054
99.9567850131225	99.9563494657412	99.9549879140081	99.952519669112	99.9485723375884	99.942419769717	99.9325630890581	99.9154575786405	99.8803869254441	99.7735200315522
99.9549671388804	99.9545132816864	99.9530944830119	99.9505224687599	99.9464092173775	99.9399981126136	99.9297273599163	99.911903263745	99.8753586572811	99.7639963777492
99.9530863320046	99.9526135315416	99.951135504949	99.9484561309012	99.944171220117	99.9374926373774	99.9267934937079	99.9082259538142	99.8701563621734	99.7541428083578
99.951140708195	99.9506483120436	99.9491090172389	99.946318585453	99.9418561038902	99.9349008343878	99.9237585519103	99.9044219651037	99.8647748244054	99.7439494130263
99.9491353643051	99.9486227716276	99.9470203294533	99.9441154342221	99.9394699382885	99.9322295034309	99.920630506428	99.9005013074517	99.8592282333082	99.7334430805273
99.9470614910126	99.9465280120308	99.9448602653249	99.9418369969051	99.9370022366858	99.9294669002863	99.9173955959462	99.8964467133254	99.853492122507	99.7225773817351
99.9449170447456	99.9443619691131	99.9426266963738	99.9394810284148	99.9344505676019	99.9266103030725	99.914050633277	99.8922541869655	99.8475608333914	99.7113415606549
99.9426999238246	99.9421225200409	99.9403174335933	99.9370452198147	99.9318124303935	99.9236569124599	99.9105923404962	99.8879196187444	99.8414285459379	99.6997245520556
99.9404079668891	99.9398074816977	99.9379302258113	99.9345271965896	99.9290852533803	99.920603849571	99.9070173464805	99.8834387820759	99.8350892742532	99.6877149729579
99.938047098996	99.9374228391045	99.9354712453693	99.9319334708025	99.9262760924162	99.9174590190819	99.9033349184213	99.8788233130892	99.8285595127362	99.6753440793658
99.9356071387798	99.934958308091	99.9329298867527	99.9292528543173	99.9233728273055	99.9142088470395	99.8995291505069	99.8740532522615	99.8218109775676	99.6625581799384
99.9330857434635	99.9324115222948	99.930303709818	99.9264827732685	99.920372670419	99.9108502127353	99.8955963882614	99.8691240173648	99.8148371777232	99.6493449254635
99.930480504095	99.9297800485105	99.9275902054899	99.9236205810713	99.9172727553506	99.9073799072386	99.8915328738323	99.8640308963999	99.8076314381087	99.6356916133903
99.9277980890768	99.9270706226284	99.9247963204807	99.9206736067805	99.9140810231647	99.9038068269089	99.887349036983	99.8587869851452	99.800212321907	99.6216334195553
99.9250270877308	99.9242717187399	99.9219101686951	99.9176293112471	99.9107838899559	99.9001157582527	99.8830270501942	99.8533699114768	99.7925481232199	99.6071101382362
99.9221648900166	99.9213807005224	99.9189290315902	99.9144848269061	99.9073782499238	99.8963032242278	99.8785628414204	99.8477745689312	99.7846316064641	99.5921079926944
99.9192088125551	99.918394857574	99.9158501142267	99.9112372055952	99.9038609099523	99.8923656499968	99.8739522240038	99.8419957071291	99.7764553318206	99.5766128133937
99.916156096665	99.9153114034308	99.9126705432241	99.9078834163971	99.9002285872693	99.8882993603036	99.8691908935943	99.8360279279071	99.7680116496338	99.5606100272331
99.9130144797153	99.912138153768	99.9093983788755	99.9044319632367	99.8964904959074	99.8841146775837	99.8642909517651	99.829886426052	99.7593220982101	99.5441404463869
99.9097707961078	99.9088618100137	99.9060199069545	99.900868378252	99.8926309623017	99.8797940475555	99.8592318271601	99.8235453842914	99.7503500838789	99.5271345529683
99.9064220584453	99.9054793546776	99.9025320158243	99.8971893791607	99.8886464313455	99.8753334899189	99.8540088578784	99.8169989554052	99.7410873183161	99.5095765471504
99.9029651959291	99.9019876860251	99.8989315069662	99.8933915920163	99.8845332486175	99.8707289131237	99.8486172516092	99.8102411283546	99.7315252805107	99.491450180475
99.8993970521398	99.8983836158359	99.8952150926676	99.8894715487671	99.8802876577347	99.8659761114014	99.8430520821444	99.8032657238994	99.7216552104099	99.4727387435596
99.8957265954777	99.8946762032758	99.8913921156322	99.8854391063293	99.8759203386908	99.8610870494661	99.8373273763223	99.796090354055	99.7115020723812	99.4534895394047
99.8919386495306	99.8908501186202	99.8874467668976	99.8812775868049	99.8714132233741	99.8560414905677	99.8314194181495	99.7886852525291	99.7010236682153	99.4336223618356
99.8880297979374	99.8869019110782	99.8833754879547	99.8769832364285	99.8667622458217	99.8508348821202	99.8253228748017	99.7810437291728	99.6902105105268	99.4131191005633
99.8839965295632	99.8828280341267	99.879174621561	99.87255219726	99.8619632271891	99.8454625450694	99.8190322651657	99.7731589074715	99.6790528469603	99.3919611329004
99.8798352359923	99.8786248429776	99.874840409128	99.8679805044261	99.8570118727579	99.839919670536	99.8125419558941	99.7650237195807	99.667540652976	99.3701293097147
99.8755563018754	99.8743028273814	99.8703836687192	99.8632795714033	99.8519205490489	99.8342201126071	99.8058681887605	99.756658558424	99.6557028344419	99.3476784014005
99.8711422487627	99.8698443322801	99.865786193213	99.8584301900647	99.8466684463629	99.8283405630909	99.7989836467624	99.7480291347365	99.6434907715839	99.3245159411153
99.8665891730229	99.8652454146812	99.8610439164614	99.8534280710115	99.8412509183065	99.8222758190606	99.7918822344258	99.7391277997121	99.6308936119023	99.3006211797964
99.8618930634057	99.8605020228829	99.8561526601949	99.8482688065344	99.8356631902721	99.8160205339148	99.7845576877606	99.7299466926417	99.6179002012797	99.2759727830855
99.8570655712879	99.8556259261827	99.8511245620731	99.842965202335	99.8299191372529	99.8095902516472	99.7770282296446	99.7205086937643	99.6045429708362	99.2506322007453
99.8520871620574	99.8505973925433	99.8459392729136	99.8374957901973	99.8239955005583	99.8029589202342	99.7692633257992	99.7107754720077	99.5907675599723	99.2244959918002
99.8469534979749	99.8454120404644	99.84059227429	99.8318558034669	99.8178871165647	99.796120757114	99.7612562008144	99.7007385234093	99.5765618970946	99.1975410432332
99.8416601222959	99.8400653682341	99.8350789237856	99.8260403446462	99.8115886798359	99.7890698207848	99.7529998928052	99.6903891094033	99.5619135763641	99.1697435912857
99.8362024561531	99.8345527507782	99.8293944517432	99.8200443819619	99.805094739398	99.7818000066224	99.7444872484895	99.6797182506124	99.5468098486203	99.1410792035619
99.8305939664983	99.8288877913459	99.8235528871754	99.813882716566	99.79842133231	99.7743292807304	99.7357393302154	99.6687523922972	99.5312881979985	99.1116189027464
99.8248121915279	99.8230478010561	99.8175308313536	99.8075306625663	99.7915417130942	99.7666276842143	99.7267210221425	99.6574474464425	99.5152860835711	99.081243588382
99.8188521820322	99.8170277807324	99.8113231287477	99.8009827809637	99.7844499893682	99.7586886176547	99.7174245903245	99.6457937028486	99.4987897121566	99.0499267958565
99.812708853827	99.8108225948531	99.8049244831888	99.7942334843326	99.7771401078528	99.7505053012578	99.7078420891065	99.6337811847758	99.4817849102416	99.0176413168068
99.8063769842346	99.8044269679948	99.7983294542001	99.7872770329443	99.7696058501649	99.7420707701281	99.6979653555565	99.6213996419103	99.4642571136693	98.9843591785719
99.7998721232572	99.7978566075408	99.7915542407881	99.7801305173811	99.7618657339593	99.7334057693276	99.6878187098424	99.6086796098082	99.4462496040054	98.9501623876556
99.7931684656808	99.791085447308	99.7845719609608	99.7727655762989	99.7538890306564	99.7244758765362	99.6773618010569	99.5955704205188	99.4276904850733	98.9149139035307
99.7862603690006	99.7841077877757	99.7773767367729	99.7651760082414	99.7456690212975	99.7152735655838	99.6665858072914	99.5820609936816	99.4085640049751	98.8785834301663
99.7791420377168	99.7769177748703	99.76996253085	99.7573554434748	99.7371988044749	99.7057911057043	99.6554816663852	99.5681399462065	99.3888539790984	98.8411398209165
99.7718075193636	99.7695093959541	99.7623231422478	99.7492973396121	99.7284712915797	99.6960205561929	99.6440400696256	99.5537955843014	99.3685437783855	98.802551054884
99.7642747515935	99.7619007702281	99.7544772572834	99.7410214114527	99.7195078436119	99.6859858474621	99.6322890714398	99.5390631320275	99.3476833297765	98.7629117292923
99.7565141133741	99.7540619769794	99.7463940184003	99.7324951025437	99.7102731854007	99.6756474617399	99.6201823434573	99.5238844059475	99.3261900445577	98.7220642569563
99.7485191765851	99.7459865230661	99.7380667289652	99.7237113472544	99.7007596609523	99.6649968219304	99.6077098294055	99.5082467697737	99.3040459424592	98.6799739586327
99.7402833397797	99.737667740251	99.7294885117121	99.7146628892694	99.6909594074848	99.6540251189688	99.5948612004669	99.4921372434652	99.2812325508834	98.6366051814005
99.7317998237047	99.7290987806756	99.7206523040682	99.7053422766492	99.6808643500609	99.6427233057833	99.5816258481497	99.4755424941865	99.2577308915439	98.591921271396
99.7230893002275	99.7203005254326	99.7115796406972	99.6957722293254	99.6704991057605	99.6311189605354	99.5680361032502	99.458503115191	99.2335985016834	98.5460312451952
99.7141177966473	99.7112386579521	99.70223513002	99.6859154061854	99.6598232134352	99.619166752658	99.5540388169631	99.4409523444745	99.2087405781604	98.4987539884274
99.7048779950807	99.7019057862394	99.6926111480863	99.6757637626164	99.6488279553224	99.6068569138014	99.5396225330069	99.4228757792003	99.1831366053082	98.4500498024426
99.6953623813818	99.692294320029	99.6826998663859	99.6653090380291	99.6375043793838	99.5941794127089	99.5247754860083	99.4042586262456	99.1567655072044	98.3998778727827
99.6855940627487	99.6824276003977	99.6725253565758	99.654576629005	99.6258800028822	99.5811650766098	99.5095338157843	99.38514626131	99.1296915996289	98.3483600607167
99.6755351933493	99.6722673982762	99.6620481914798	99.6435249355113	99.6139097481149	99.5677633996644	99.4938382997559	99.3654642798888	99.1018091887405	98.2952942217296
99.6651776646289	99.6618055228999	99.6512599230147	99.6321450427566	99.6015839533285	99.5539635540135	99.4776762357046	99.3451967052865	99.0730954949958	98.2406361459827
99.6545131514572	99.6510335647076	99.6401518773427	99.6204277975609	99.5888926981237	99.5397544214389	99.4610345798459	99.3243271290795	99.0435271178627	98.1843403788375
99.6435331065649	99.6399428897184	99.6287151490645	99.6083638022144	99.5758257967765	99.525124585835	99.4438999379174	99.3028386997647	99.0130800188678	98.1263601853399
99.6322641138651	99.6285603509216	99.6169774316949	99.5959822745445	99.5624149069343	99.5101095129207	99.4263138876753	99.2807836208087	98.9818281922029	98.0668357644716
99.6206628307083	99.6168421664991	99.6048935704141	99.5832355695508	99.5486083976772	99.4946513494212	99.4082085813748	99.258076630268	98.9496504587335	98.005534985072
99.608720037232	99.6047790229629	99.5924539586569	99.570113549024	99.5343952796951	99.4787377768252	99.3895695626413	99.2346995330007	98.916520840143	97.942407213323
99.5964262685154	99.592361359244	99.579648734375	99.5566058049194	99.5197642708171	99.4623561476828	99.370381987832	99.2106336436649	98.8824126508672	97.8774003849155
99.5837718083	99.5795793603466	99.5664677734819	99.5427016524204	99.5047037884621	99.4454934770881	99.350630615934	99.1858597738082	98.8472984787091	97.8104609636326
99.5707872116606	99.5664638906276	99.5529429064539	99.5284346740826	99.4892502195708	99.4281905290625	99.3303632362697	99.1604379262057	98.8112633735328	97.7417500966293
99.5574228796064	99.5529648481809	99.5390224590357	99.5137503437369	99.4733444725561	99.410381083814	99.309502176499	99.13427046473	98.7741684870415	97.6710013132527
99.5436683350638	99.5390716493441	99.5246955138759	99.4986371386134	99.4569740551673	99.3920511343253	99.2880309915132	99.1073366752396	98.7359841970838	97.5981565911177
99.5295128237538	99.5247734303843	99.5099508645753	99.4830832305848	99.4401261436148	99.3731863009781	99.2659327971113	99.0796152868611	98.6966800754971	97.5231562604349
99.5149453071028	99.5100590403327	99.4947770082842	99.4670764783285	99.4227875740321	99.3537718219068	99.2431902585362	99.0510844572876	98.6562248658757	97.4459389554883
99.5000008720632	99.4949639213126	99.4792104965889	99.4506554454691	99.4050001305239	99.333854507742	99.2198582541001	99.0218130905219	98.6147162362061	97.3666897318092
99.4846228034327	99.4794307825833	99.4631922392797	99.4337577776951	99.3866962328782	99.3133586172371	99.1958479265461	98.991689453828	98.5719951825948	97.2851027812459
99.4687992022347	99.4634476038545	99.4467098362377	99.4163703856221	99.3678616875991	99.2922682308756	99.1711405759176	98.9606899718881	98.5280279288728	97.2011115636635
99.4525178559888	99.4470020480766	99.4297505603827	99.398479834361	99.3484819258994	99.2705670070802	99.1457170043308	98.9287904368354	98.4827797794548	97.1146476368531
99.4358178755232	99.4301336219981	99.4123551552189	99.380129110306	99.3286035241634	99.2483071255046	99.1196383848226	98.8960676567531	98.436359606903	97.0259172865407
99.4186362270117	99.4127786516636	99.3944579453057	99.3612489072316	99.3081513625512	99.2254043858712	99.0928059193812	98.8623973616982	98.3885904555708	96.9345795107594
99.4009597492719	99.3949238414477	99.3760452140425	99.3418247444688	99.2871097360944	99.2018411684006	99.0651989013218	98.827753425263	98.3394348313443	96.8405600584272
99.3827749354317	99.3765555464311	99.3571028842364	99.3218417602113	99.2654625256657	99.1775993872535	99.0367960735748	98.7921090206297	98.2888542184737	96.7437825413505
99.3640679241022	99.3576597634766	99.337616508876	99.3012847017382	99.2431931873079	99.1526604784416	99.0075756142548	98.7554366019213	98.2368090509098	96.6441683688207
99.3448835537801	99.3382817850131	99.3176327983609	99.2802028509848	99.2203551189937	99.1270842642875	98.9776076569543	98.7178242290698	98.1834241531526	96.5419540444888
99.3251498411869	99.3183488959847	99.2970767494889	99.2585170535561	99.1968625183875	99.1007745562643	98.9467793096008	98.6791298438638	98.1284970605782	96.4367483080622
99.3048518522534	99.2978460093464	99.2759327961439	99.2362108736041	99.172697555443	99.0737113423209	98.9150670386852	98.6393237188905	98.0719850089122	96.3284658317672
99.2839742620024	99.276757643045	99.2541849643461	99.2132674440283	99.1478419312342	99.0458740823039	98.8824466861611	98.5983753299907	98.0138440656721	96.2170188057726
99.2625013445632	99.255067909923	99.2318168618092	99.1896694554	99.1222768658535	99.0172416942218	98.8488934529975	98.5562533348894	97.9540290970163	96.1023168601484
99.2404844590266	99.2328286890583	99.2088819919241	99.1654733568635	99.0960635234843	98.9878827015733	98.814487674677	98.5130586046459	97.8926830902593	95.9846308971002
99.2178414588923	99.209956997853	99.1852947576146	99.1405888076009	99.0691039650496	98.9576872909745	98.7791004322275	98.4686288338818	97.8295744868029	95.8635119618951
99.1945554053647	99.1864357234463	99.1610375008224	99.1149971594842	99.0413779545449	98.9266327393686	98.7427049838421	98.4229301974004	97.7646544921829	95.738861839421
99.1706089175649	99.1622473062257	99.1360921020954	99.0886792763369	99.0128647249918	98.8946957250538	98.705273878595	98.3759279627615	97.6978729738273	95.6105794196774
99.145984161222	99.1373737283911	99.1104399687537	99.0616155213711	98.9835429646922	98.861852312049	98.6667789376573	98.3275864657283	97.6291784225341	95.4785606039105
99.1207399124928	99.1118743612395	99.08414233117	99.03387049648	98.9534826721036	98.8281809219205	98.6273121021063	98.2780211517717	97.5587344888781	95.3431154115306
99.094782488826	99.0856545673931	99.0571015660433	99.0053411599922	98.9225721249018	98.793556262016	98.5867262332568	98.227046672518	97.4862764254238	95.2037285703115
99.0680926841935	99.0586949427354	99.0292976487099	98.9760063599641	98.8907883621933	98.7579525355968	98.5449909454684	98.1746245344866	97.4117485247413	95.06028680283
99.040650792495	99.0309755777556	99.0007100324142	98.9458443919427	98.8581078215339	98.7213432669186	98.5020750472791	98.1207152098325	97.3350935433962	94.9126734384798
99.012522156127	99.0025624765377	98.9714067881984	98.9149270755114	98.8246083225781	98.6838156407756	98.4580807550827	98.0654470482309	97.2564934266477	94.7612331094587
98.984387767249	98.9741435586843	98.942097489355	98.8840032705191	98.7911016493481	98.6462797636931	98.4140763077567	98.010164305435	97.1778633833294	94.6096588710911
98.956250388993	98.9457216162356	98.9127850174382	98.8530760212638	98.7575911080485	98.6087393533613	98.3700660865293	97.9548725127398	97.0992112554185	94.4579651549366
98.9281100208774	98.917296649425	98.8834693739743	98.8221453319312	98.7240767083484	98.5711944300812	98.3260501293026	97.8995717232613	97.0205370011947	94.3061510209698
98.8999666624528	98.8888686585158	98.8541505605405	98.7912112068023	98.6905584600885	98.5336450143911	98.2820284738677	97.8442619853665	96.9418405490223	94.1542155865334
98.8718203133019	98.8604376438016	98.8248285787666	98.7602736502555	98.6570363732805	98.4960911270525	98.2380011577468	97.7889433418005	96.8631218061958	94.0021580134611
98.8436709730395	98.8320036056072	98.7955034303349	98.7293326667668	98.6235104581068	98.458532789032	98.1939682180131	97.7336158293031	96.7843806652872	93.8499774984812
98.8155186413123	98.8035665442891	98.7661751169815	98.6983882609113	98.5899807249193	98.4209700214795	98.1499296911117	97.6782794785505	96.7056170086972	93.6976732660164
98.7873633177987	98.7751264602362	98.7368436404968	98.6674404373635	98.5564471842373	98.3834028457002	98.1058856126904	97.6229343143026	96.6268307119153	93.5452445627342
98.7592050022094	98.7466833538704	98.7075090027266	98.6364892008983	98.5229098467456	98.3458312831246	98.061836017449	97.5675803556767	96.5480216458528	93.3926906533857
98.731043694287	98.7182372256473	98.6781712055726	98.6055345563921	98.4893687232915	98.3082553552746	98.0177809390089	97.512217616491	96.4691896785091	93.2400108175936
98.7028793938059	98.6897880760566	98.6488302509932	98.5745765088226	98.4558238248803	98.270675083728	97.9737204098053	97.4568461056428	96.3903346761584	93.0872043473447
98.674712100573	98.661335905623	98.6194861410045	98.5436150632698	98.4222751626713	98.2330904900812	97.9296544609996	97.4014658274953	96.3114565041918	92.9342705450085
98.6465418144272	98.6328807149067	98.5901388776806	98.5126502249164	98.3887227479717	98.1955015959119	97.8855831224124	97.3460767822571	96.2325550277118	92.7812087217504
98.6183685352399	98.6044225045038	98.560788463155	98.4816819990474	98.3551665922306	98.1579084227418	97.8415064224745	97.2906789663469	96.153630111949	92.6280181962444
98.5901922629148	98.5759612750473	98.5314348996206	98.4507103910509	98.3216067070322	98.1203109919994	97.7974243881934	97.2352723727347	96.0746816225506	92.474698293614
98.5620129973886	98.5474970272074	98.5020781893309	98.4197354064172	98.2880431040874	98.0827093249844	97.753337045134	97.1798569912591	95.9957094257768	92.3212483445499
98.5338307386308	98.519029761692	98.4727183346005	98.3887570507388	98.2544757952264	98.0451034428339	97.7092444174114	97.1244328089197	95.9167133886322	92.1676676845649
98.5056454866439	98.4905594792478	98.4433553378056	98.3577753297099	98.220904792389	98.0074933664895	97.6651465276936	97.0689998101429	95.8376933789487	92.0139556533567
98.4774572414638	98.4620861806604	98.413989201385	98.3267902491255	98.1873301076158	97.9698791166666	97.6210433972131	97.0135579770242	95.758649265436	91.8601115942583
98.44926600316	98.433609866755	98.3846199278401	98.2958018148803	98.1537517530384	97.9322607138264	97.5769350457848	96.958107289548	95.6795809177074	91.7061348537565
98.4210717718358	98.4051305383971	98.3552475197361	98.2648100329678	98.1201697408691	97.8946381781488	97.5328214918301	96.9026477257856	95.600488206288	91.5520247810687
98.3928745476285	98.3766481964928	98.3258719797017	98.2338149094788	98.086584083391	97.8570115295091	97.4887027524055	96.8471792620742	95.5213710026124	91.3977807277662
98.36467433071	98.3481628419898	98.2964933104302	98.2028164505997	98.0529947929473	97.819380787455	97.444578843234	96.7917018731783	95.4422291790124	91.2434020474362
98.3364711212868	98.3196744758776	98.2671115146796	98.171814662611	98.0194018819309	97.7817459711875	97.4004497787405	96.7362155324345	95.3630626087	91.0888880953779
98.3082649196002	98.291183099188	98.2377265952728	98.1408095518849	97.9858053627739	97.7441070995424	97.3563155720878	96.680720211883	95.2838711657466	90.9342382283265
98.2800557259271	98.2626887129959	98.2083385550981	98.1098011248834	97.952205247937	97.7064641909752	97.3121762352144	96.6252158823848	95.2046547250585	90.7794518042007
98.2518435405798	98.2341913184198	98.1789473971092	98.0787893881561	97.9186015498988	97.6688172635467	97.2680317788736	96.5697025137284	95.1254131623525	90.6245281818728
98.2236283639067	98.2056909166219	98.1495531243254	98.0477743483374	97.884994281146	97.631166334911	97.2238822126724	96.5141800747252	95.0461463541295	90.4694667209557
98.1954101962924	98.1771875088091	98.1201557398316	98.0167560121439	97.8513834541625	97.5935114223053	97.1797275451106	96.458648533296	94.9668541776483	90.3142667816068
98.1671890381582	98.1486810962332	98.0907552467786	97.9857343863716	97.8177690814202	97.5558525425413	97.1355677836197	96.4031078565491	94.8875365108992	90.1589277243461
98.1389648899626	98.1201716801915	98.0613516483825	97.9547094778931	97.7841511753688	97.5181897119976	97.0914029346011	96.3475580108506	94.8081932325782	90.003448909887
98.1107377522012	98.0916592620271	98.0319449479251	97.9236812936544	97.7505297484262	97.4805229466146	97.0472330034644	96.2919989618884	94.7288242220609	89.8478296989783
98.0825076254075	98.0631438431294	98.0025351487533	97.8926498406717	97.7169048129699	97.442852261889	97.0030579946637	96.2364306747299	94.6494293593783	89.6920694522563
98.054274510153	98.0346254249344	97.9731222542789	97.8616151260282	97.6832763813273	97.4051776728715	96.958877911734	96.1808531138741	94.5700085251916	89.5361675301062
98.0260384070477	98.0061040089254	97.9437062679786	97.8305771568706	97.649644465768	97.3674991941642	96.914692757326	96.1252662432997	94.4905616007691	89.3801232925316
97.9977993167404	97.977579596633	97.9142871933929	97.799535940406	97.6160090784949	97.3298168399194	96.8705025332403	96.0696700265077	94.4110884679632	89.2239360990315
97.9695572399194	97.9490521896356	97.8848650341263	97.768491483898	97.5823702316366	97.2921306238393	96.8263072404598	96.0140644265609	94.3315890091876	89.0676053084841
97.9413121773121	97.9205217895597	97.8554397938464	97.7374437946634	97.5487279372399	97.2544405591769	96.7821068791821	95.9584494061196	94.2520631073967	88.9111302790365
97.9130641296862	97.8919883980801	97.8260114762832	97.7063928800684	97.5150822072624	97.216746658737	96.7379014488493	95.9028249274746	94.1725106460641	88.7545103680003
97.8848130978495	97.8634520169204	97.7965800852287	97.6753387475252	97.481433053566	97.1790489348786	96.6936909481781	95.8471909525762	94.0929315091629	88.5977449317519
97.8565590826505	97.8349126478528	97.7671456245358	97.6442814044885	97.4477804879098	97.141347399517	96.6494753751878	95.7915474430619	94.013325581146	88.4408333256379
97.8283020849788	97.806370292699	97.7377080981181	97.6132208584512	97.4141245219449	97.1036420641277	96.6052547272273	95.735894360281	93.9336927469281	88.2837749038844
97.8000421057651	97.7778249533296	97.7082675099481	97.5821571169415	97.3804651672078	97.0659329397493	96.5610290010018	95.6802316653174	93.8540328918665	88.1265690195105
97.771779145982	97.7492766316647	97.6788238640572	97.5510901875187	97.3468024351151	97.0282200369884	96.5167981925971	95.6245593190104	93.7743459017449	87.9692150242453
97.7435132066441	97.720725329674	97.6493771645342	97.52002007777	97.3131363369587	96.9905033660233	96.4725622975043	95.5688772819738	93.6946316627556	87.8117122684479
97.7152442888081	97.6921710493768	97.6199274155244	97.4889467953066	97.2794668839008	96.9527829366095	96.4283213106422	95.5131855146134	93.614890061484	87.6540601010307
97.6869723935736	97.6636137928421	97.5904746212285	97.45787034776	97.2457940869696	96.9150587580844	96.3840752263798	95.4574839771428	93.5351209848923	87.4962578693858
97.658697522083	97.6350535621884	97.5610187859017	97.4267907427789	97.2121179570546	96.8773308393726	96.3398240385572	95.4017726295988	93.4553243203047	87.3383049193134
97.630419675522	97.6064903595843	97.5315599138519	97.3957079880254	97.1784385049035	96.8395991889918	96.2955677405054	95.3460514318544	93.3754999553929	87.1802005949531
97.6021388551196	97.5779241872478	97.5020980094394	97.3646220911714	97.1447557411182	96.8018638150582	96.2513063250664	95.2903203436314	93.2956477781615	87.0219442387169
97.5738550621488	97.5493550474465	97.472633077075	97.3335330598955	97.1110696761514	96.7641247252926	96.2070397846109	95.2345793245122	93.2157676769348	86.8635351912247
97.5455682979263	97.5207829424978	97.4431651212188	97.3024409018795	97.0773803203041	96.7263819270262	96.1627681110563	95.1788283339503	93.1358595403433	86.7049727912413
97.5172785638133	97.4922078747683	97.4136941463791	97.2713456248052	97.0436876837221	96.6886354272069	96.1184912958837	95.1230673312797	93.0559232573113	86.5462563756158
97.4889858612153	97.4636298466738	97.3842201571108	97.2402472363508	97.0099917763942	96.6508852324053	96.0742093301538	95.0672962757246	92.9759587170438	86.3873852792216
97.4606901915825	97.4350488606794	97.3547431580144	97.2091457441882	96.9762926081496	96.613131348821	96.0299222045227	95.0115151264072	92.8959658090155	86.2283588348989
97.4323915564098	97.406464919299	97.325263153734	97.1780411559797	96.9425901886557	96.5753737822886	95.9856299092564	94.9557238423555	92.8159444229586	86.0691763733981
97.4040899572372	97.377878025095	97.2957801489566	97.146933479375	96.9088845274167	96.5376125382844	95.9413324342447	94.8999223825106	92.7358944488516	85.9098372233244
97.3757853956497	97.3492881806783	97.2662941484101	97.115822722008	96.8751756337717	96.4998476219322	95.8970297690156	94.8441107057329	92.6558157769088	85.7503407110839
97.3474778732778	97.3206953887077	97.2368051568619	97.0847088914944	96.8414635168932	96.4620790380097	95.8527219027474	94.7882887708087	92.5757082975695	85.5906861608309
97.3191673917971	97.2920996518899	97.2073131791178	97.0535919954285	96.8077481857861	96.4243067909548	95.8084088242815	94.7324565364552	92.495571901488	85.4308728944157
97.2908539529287	97.263500972979	97.17781822002	97.0224720413806	96.7740296492868	96.3865308848717	95.7640905221341	94.6766139613261	92.4154064795234	85.2709002313337
97.2625375584393	97.2348993547759	97.148320284446	96.9913490368943	96.7403079160617	96.348751323537	95.7197669845075	94.6207610040161	92.3352119227304	85.1107674886758
97.2342182101413	97.2062948001282	97.1188193773069	96.9602229894839	96.7065829946072	96.3109681104056	95.6754381993014	94.5648976230657	92.2549881223496	84.9504739810788
97.2058959098924	97.1776873119298	97.0893155035459	96.9290939066322	96.6728548932488	96.2731812486171	95.6311041541228	94.5090237769649	92.1747349697988	84.7900190206772
97.1775706595961	97.1490768931201	97.0598086681369	96.8979617957876	96.6391236201405	96.2353907410013	95.5867648362961	94.4531394241571	92.0944523566642	84.6294019170554
97.1492424612014	97.1204635466838	97.0302988760826	96.8668266643622	96.605389183265	96.1975965900845	95.5424202328728	94.3972445230428	92.0141401746914	84.4686219772007
97.1209113167031	97.0918472756502	97.0007861324133	96.835688519729	96.5716515904331	96.1597987980948	95.4980703306404	94.3413390319826	91.9337983157778	84.3076785054568
97.0925772281412	97.0632280830931	96.9712704421856	96.8045473692205	96.537910849284	96.1219973669684	95.4537151161316	94.2854229093002	91.8534266719641	84.1465708034784
97.0642401976013	97.0346059721295	96.9417518104802	96.7734032201257	96.5041669672849	96.0841922983544	95.409354575632	94.2294961132851	91.7730251354265	83.9852981701849
97.0359002272145	97.0059809459199	96.912230242401	96.7422560796888	96.470419951732	96.0463835936211	95.364988695189	94.1735586021956	91.6925935984694	83.8238599017166
97.0075573191567	96.9773530076669	96.8827057430732	96.7111059551068	96.43666980975	96.0085712538611	95.3206174606188	94.1176103342604	91.6121319535175	83.6622552913895
96.9792114756494	96.9487221606151	96.8531783176419	96.6799528535279	96.4029165482928	95.9707552798967	95.2762408575141	94.0616512676813	91.5316400931088	83.500483629652
96.9508626989586	96.9200884080504	96.8236479712707	96.6487967820494	96.3691601741441	95.932935672285	95.2318588712514	94.0056813606352	91.4511179098879	83.3385442040403
96.9225109913954	96.8914517532992	96.7941147091402	96.6176377477162	96.3354006939176	95.8951124313231	95.1874714869976	93.9497005712754	91.3705652965984	83.1764362991361
96.8941563553152	96.8628121997278	96.7645785364463	96.5864757575191	96.301638114058	95.8572855570535	95.1430786897163	93.8937088577338	91.2899821460769	83.014159196523
96.8657987931179	96.8341697507417	96.735039458399	96.555310818393	96.2678724408416	95.8194550492686	95.0986804641746	93.8377061781224	91.2093683512462	82.8517121747439
96.8374383072475	96.8055244097849	96.7054974802206	96.5241429372156	96.2341036803768	95.7816209075158	95.0542767949489	93.7816924905344	91.1287238051088	82.6890945092587
96.8090749001916	96.7768761803392	96.6759526071448	96.4929721208059	96.2003318386053	95.7437831311022	95.0098676664306	93.7256677530458	91.0480484007412	82.5263054724019
96.7807085744816	96.7482250659237	96.6464048444147	96.4617983759227	96.1665569213026	95.7059417190993	94.9654530628317	93.6696319237164	90.9673420312873	82.3633443333406
96.7523393326921	96.7195710700935	96.6168541972817	96.4306217092635	96.1327789340794	95.6680966703476	94.9210329681904	93.6135849605909	90.8866045899526	82.2002103580327
96.7239671774406	96.6909141964394	96.5873006710041	96.3994421274628	96.0989978823821	95.6302479834611	94.8766073663759	93.5575268217	90.8058359699988	82.0369028091852
96.6955921113871	96.662254448587	96.5577442708456	96.3682596370913	96.0652137714942	95.5923956568315	94.8321762410934	93.501457465061	90.7250360647378	81.8734209462125
96.667214137234	96.633591830196	96.5281850020739	96.3370742446547	96.0314266065372	95.5545396886329	94.7877395758892	93.445376848679	90.6442047675264	81.7097640251952
96.6388332577255	96.6049263449593	96.4986228699597	96.3058859565923	95.9976363924715	95.5166800768255	94.7432973541548	93.3892849305472	90.5633419717605	81.5459312988383
96.6104494756472	96.5762579966021	96.4690578797748	96.2746947792765	95.9638431340981	95.4788168191601	94.6988495591316	93.333181668648	90.4824475708705	81.3819220164304
96.5820627938257	96.5475867888814	96.4394900367913	96.2435007190112	95.9300468360593	95.440949913182	94.654396173915	93.277067020953	90.4015214583156	81.2177354238022
96.5536732151285	96.5189127255849	96.4099193462802	96.2123037820314	95.8962475028398	95.4030793562348	94.6099371814585	93.2209409454241	90.3205635275791	81.0533707632854
96.5252807424629	96.4902358105303	96.3803458135099	96.181103974502	95.8624451387684	95.3652051454647	94.5654725645776	93.1648034000134	90.2395736721631	80.8888272736714
96.4968853787762	96.4615560475646	96.3507694437452	96.1499013025171	95.8286397480189	95.3273272778235	94.5210023059537	93.1086543426642	90.158551785584	80.7241041901703
96.4684871270547	96.4328734405627	96.321190242246	96.1186957720992	95.7948313346114	95.2894457500731	94.4765263881376	93.0524937313107	90.0774977613678	80.5592007443696
96.4400859903237	96.4041879934276	96.2916082142661	96.0874873891988	95.7610199024139	95.2515605587886	94.4320447935529	92.9963215238785	89.9964114930451	80.3941161641931
96.4116819716464	96.3754997100883	96.2620233650519	96.056276159693	95.7272054551428	95.2136717003619	94.3875575044996	92.9401376782853	89.9152928741467	80.2288496738594
96.3832750741239	96.3468085944999	96.2324356998414	96.0250620893854	95.6933879963653	95.1757791710053	94.3430645031574	92.8839421524403	89.8341417981995	80.0634004938412
96.3548653008945	96.3181146506424	96.2028452238632	95.9938451840056	95.6595675294998	95.1378829667548	94.2985657715883	92.827734904245	89.7529581587215	79.8977678408232
96.326452655133	96.2894178825199	96.1732519423348	95.9626254492083	95.6257440578176	95.0999830834732	94.2540612917402	92.7715158915928	89.6717418492182	79.7319509276613
96.2980371400502	96.2607182941594	96.1436558604622	95.9314028905729	95.5919175844444	95.0620795168534	94.2095510454497	92.7152850723696	89.5904927631778	79.5659489633405
96.2696187588924	96.2320158896106	96.1140569834384	95.900177513603	95.5580881123614	95.0241722624219	94.1650350144446	92.6590424044533	89.5092107940674	79.399761152934
96.2411975149408	96.2033106729445	96.0844553164424	95.8689493237264	95.5242556444066	94.9862613155413	94.1205131803468	92.6027878457144	89.4278958353287	79.2333866975606
96.212773411511	96.1746026482525	96.0548508646385	95.8377183262939	95.4904201832764	94.9483466714136	94.075985524675	92.5465213540153	89.3465477803745	79.0668247943436
96.1843464519518	96.1458918196461	96.0252436331746	95.8064845265797	95.4565817315269	94.9104283250832	94.0314520288472	92.4902428872109	89.2651665225842	78.9000746363681
96.1559166396455	96.1171781912555	95.995633627182	95.7752479297805	95.4227402915749	94.8725062714395	93.9869126741828	92.4339524031479	89.1837519553003	78.7331354126396
96.1274839780066	96.0884617672288	95.9660208517739	95.7440085410158	95.3888958656998	94.8345805052201	93.9423674419052	92.3776498596654	89.1023039718245	78.566006308041
96.0990484704813	96.0597425517313	95.9364053120446	95.7127663653269	95.3550484560445	94.7966510210129	93.8978163131444	92.3213352145939	89.0208224654141	78.3986865032906
96.0706101205469	96.0310205489448	95.9067870130687	95.6815214076774	95.3211980646172	94.7587178132596	93.8532592689383	92.2650084257562	88.9393073292783	78.2311751748989
96.0421689317111	96.0022957630661	95.8771659599	95.6502736729525	95.2873446932922	94.7207808762575	93.8086962902357	92.2086694509662	88.8577584565746	78.0634714951263
96.0137249075114	95.9735681983069	95.8475421575707	95.619023165959	95.2534883438117	94.6828402041626	93.7641273578978	92.1523182480294	88.7761757404051	77.89557463194
95.9852780515144	95.9448378588924	95.8179156110907	95.5877698914252	95.2196290177868	94.6448957909919	93.7195524527003	92.0959547747424	88.6945590738132	77.72748374897
95.956828367315	95.9161047490607	95.7882863254465	95.5565138540007	95.1857667166993	94.6069476306257	93.6749715553354	92.039578988893	88.6129083497802	77.5591980054668
95.9283758585357	95.887368873062	95.7586543056005	95.5252550582564	95.1519014419025	94.5689957168103	93.6303846464134	91.9831908482593	88.531223461222	77.3907165562565
95.8999205288262	95.8586302351574	95.7290195564902	95.4939935086842	95.1180331946228	94.5310400431601	93.5857917064648	91.9267903106101	88.4495043009854	77.2220385516977
95.8714623818622	95.8298888396186	95.6993820830274	95.4627292096973	95.084161975961	94.4930806031599	93.5411927159418	91.8703773337043	88.3677507618452	77.0531631376369
95.8430014213453	95.8011446907265	95.6697418900974	95.4314621656297	95.0502877868934	94.455117390167	93.4965876552196	91.8139518752909	88.2859627365007	76.8840894553642
95.8145376510016	95.7723977927709	95.6400989825586	95.4001923807367	95.0164106282735	94.4171503974136	93.4519765045988	91.7575138931083	88.204140117573	76.7148166415684
95.7860710745815	95.7436481500493	95.610453365241	95.3689198591946	94.9825305008329	94.3791796180091	93.4073592443064	91.7010633448842	88.1222827976012	76.5453438282923
95.7576016958587	95.7148957668661	95.5808050429465	95.337644605101	94.9486474051828	94.3412050449414	93.3627358544972	91.6446001883354	88.0403906690396	76.3756701428872
95.7291295186296	95.6861406475319	95.5511540204473	95.3063666224742	94.9147613418152	94.3032266710798	93.3181063152555	91.5881243811675	87.958463624255	76.2057947079673
95.7006545467125	95.6573827963628	95.5215003024858	95.2750859152543	94.8808723111039	94.2652444891764	93.2734706065967	91.5316358810741	87.8765015555231	76.035716641364
95.672176783947	95.6286222176793	95.491843893774	95.2438024873023	94.8469803133063	94.2272584918683	93.2288287084679	91.475134645737	87.7945043550259	75.8654350560799
95.6436962341928	95.5998589158058	95.4621847989923	95.2125163424009	94.8130853485642	94.1892686716795	93.18418060075	91.4186206328255	87.7124719148487	75.6949490602417
95.6152129013297	95.5710928950696	95.4325230227896	95.181227484254	94.7791874169051	94.1512750210225	93.1395262632585	91.3620937999965	87.630404126977	75.5242577570543
95.5867267892562	95.5423241598001	95.4028585697819	95.1499359164876	94.7452865182436	94.1132775322006	93.094865675745	91.3055541048934	87.548300883294	75.3533602447527
95.558237901889	95.5135527143283	95.3731914445527	95.1186416426493	94.7113826523822	94.0752761974089	93.0501988178979	91.2490015051464	87.4661620755775	75.1822556165553
95.5297462431625	95.4847785629856	95.3435216516516	95.0873446662084	94.677475819013	94.0372710087368	93.0055256693442	91.1924359583717	87.3839875954971	75.0109429606158
95.5012518170275	95.4560017101035	95.3138491955943	95.0560449905569	94.6435660177185	93.9992619581693	92.96084620965	91.1358574221714	87.3017773346118	74.8394213599747
95.4727546274509	95.4272221600124	95.2841740808615	95.0247426190088	94.6096532479729	93.9612490375887	92.9161604183219	91.079265854133	87.2195311843668	74.6676898925116
95.4442546784149	95.3984399170413	95.254496311899	94.9934375548006	94.5757375091434	93.9232322387761	92.8714682748081	91.0226612118288	87.1372490360909	74.4957476308955
95.4157519739159	95.3696549855166	95.2248158931171	94.9621298010917	94.5418188004907	93.8852115534132	92.826769758499	90.9660434528159	87.0549307809942	74.3235936425356
95.3872465179642	95.3408673697617	95.1951328288895	94.9308193609644	94.5078971211712	93.8471869730838	92.7820648487286	90.9094125346354	86.9725763101651	74.1512269895323
95.3587383145831	95.3120770740962	95.1654471235538	94.8995062374239	94.4739724702372	93.8091584892752	92.7373535247752	90.8527684148123	86.8901855145676	73.9786467286265
95.3302273678081	95.2832841028349	95.1357587814101	94.8681904333993	94.4400448466383	93.7711260933798	92.6926357658623	90.796111050855	86.8077582850393	73.8058519111491
95.3017136816859	95.2544884602877	95.1060678067212	94.8368719517431	94.4061142492226	93.7330897766962	92.6479115511595	90.7394404002548	86.7252945122881	73.6328415829707
95.2731972602744	95.2256901507584	95.0763742037121	94.8055507952315	94.3721806767377	93.6950495304312	92.6031808597834	90.6827564204854	86.6427940868903	73.4596147844498
95.244678107641	95.1968891785439	95.0466779765693	94.7742269665653	94.3382441278317	93.6570053457007	92.5584436707985	90.6260590690028	86.5602568992875	73.2861705503812
95.2161562278628	95.1680855479341	95.0169791294407	94.7429004683694	94.3043046010544	93.6189572135312	92.5136999632176	90.5693483032446	86.4776828397848	73.1125079099441
95.187631625025	95.1392792632106	94.9872776664348	94.7115713031937	94.270362094858	93.5809051248612	92.4689497160032	90.5126240806297	86.3950717985476	72.9386258866492
95.1591043032209	95.1104703286465	94.9575735916211	94.6802394735127	94.2364166075987	93.5428490705424	92.4241929080676	90.4558863585579	86.3124236655999	72.7645234982859
95.1305742665507	95.0816587485055	94.9278669090289	94.6489049817266	94.2024681375372	93.5047890413408	92.379429518274	90.3991350944092	86.2297383308213	72.5901997568684
95.1020415191209	95.0528445270412	94.8981576226475	94.6175678301609	94.1685166828399	93.4667250279384	92.3346595254371	90.3423702455437	86.1470156839449	72.4156536685825
95.0735060650438	95.0240276684967	94.8684457364256	94.586228021067	94.1345622415798	93.4286570209339	92.2898829083236	90.2855917693012	86.0642556145549	72.2408842337304
95.0449679084363	94.9952081771037	94.838731254271	94.5548855566228	94.1006048117377	93.3905850108442	92.2450996456534	90.2287996230003	85.9814580120841	72.0658904466763
95.0164270534197	94.9663860570819	94.8090141800506	94.5235404389321	94.066644391203	93.3525089881055	92.2003097160994	90.1719937639386	85.8986227658119	71.8906712957907
94.9878835041186	94.9375613126388	94.7792945175897	94.4921926700261	94.0326809777746	93.3144289430743	92.1555130982888	90.1151741493917	85.8157497648616	71.7152257633947
94.9593372646604	94.9087339479684	94.7495722706718	94.4608422518627	93.9987145691618	93.2763448660286	92.1107097708033	90.0583407366131	85.7328388981983	71.5395528257035
94.9307883391746	94.8799039672513	94.7198474430386	94.4294891863274	93.9647451629857	93.238256747169	92.0658997121801	90.0014934828337	85.6498900546267	71.3636514527696
94.902236731792	94.8510713746534	94.6901200383895	94.3981334752336	93.9307727567794	93.2001645766198	92.0210829009117	89.9446323452612	85.5669031227885	71.1875206084253
94.873682446644	94.8222361743259	94.6603900603812	94.3667751203225	93.8967973479893	93.1620683444299	91.9762593154474	89.8877572810799	85.4838779911608	71.0111592502247
94.8451254878621	94.7933983704045	94.6306575126277	94.3354141232639	93.8628189339762	93.1239680405739	91.9314289341928	89.8308682474503	85.400814548053	70.8345663293853
94.816565859577	94.764557967009	94.6009223987002	94.3040504856563	93.8288375120155	93.0858636549531	91.8865917355113	89.7739652015081	85.3177126816056	70.6577407907288
94.7880035659179	94.7357149682422	94.5711847221266	94.2726842090273	93.794853079299	93.0477551773964	91.8417476977236	89.7170481003646	85.234572279787	70.4806815726217
94.7594386110123	94.70686937819	94.5414444863911	94.2413152948341	93.7608656329348	93.0096425976615	91.7968967991091	89.6601169011056	85.1513932303921	70.3033876069153
94.7308709989845	94.6780212009207	94.5117016949345	94.2099437444633	93.7268751699489	92.9715259054354	91.7520390179056	89.6031715607913	85.0681754210396	70.1258578188843
94.7023007339558	94.649170440484	94.4819563511538	94.178569559232	93.6928816872855	92.9334050903357	91.7071743323102	89.5462120364556	84.9849187391703	69.9480911271664
94.6737278200433	94.6203171009113	94.4522084584018	94.1471927403875	93.6588851818083	92.8952801419112	91.6623027204795	89.4892382851061	84.9016230720445	69.7700864436995
94.6451522613593	94.5914611862142	94.4224580199872	94.1158132891079	93.6248856503009	92.8571510496431	91.6174241605301	89.4322502637232	84.8182883067404	69.59184267366
94.6165740620109	94.562602700385	94.3927050391744	94.0844312065026	93.5908830894677	92.8190178029456	91.5725386305391	89.3752479292597	84.7349143301515	69.4133587153993
94.5879932260994	94.5337416473955	94.3629495191829	94.0530464936123	93.556877495935	92.7808803911666	91.5276461085441	89.3182312386407	84.6515010289848	69.2346334603801
94.5594097577191	94.5048780311967	94.3331914631879	94.0216591514098	93.5228688662512	92.7427388035891	91.4827465725439	89.2612001487631	84.5680482897585	69.055665793112
94.5308236609573	94.4760118557183	94.3034308743195	93.9902691807999	93.4888571968882	92.7045930294314	91.437840000499	89.2041546164947	84.4845559988001	68.876454591087
94.5022349398936	94.4471431248686	94.2736677556629	93.9588765826198	93.4548424842417	92.666443057848	91.3929263703313	89.1470945986743	84.4010240422445	68.6969987247133
94.4736435985989	94.4182718425333	94.2439021102583	93.9274813576398	93.420824724632	92.6282888779308	91.3480056599254	89.0900200521111	84.3174523060313	68.5172970572493
94.4450496411352	94.3893980125756	94.2141339411004	93.8960835065635	93.3868039143051	92.5901304787093	91.3030778471278	89.0329309335839	84.2338406759035	68.3373484447368
94.4164530715548	94.3605216388357	94.1843632511386	93.8646830300277	93.3527800494331	92.5519678491517	91.2581429097483	88.9758271998415	84.150189037405	68.1571517359334
94.3878538938998	94.3316427251302	94.1545900432769	93.8332799286036	93.3187531261147	92.5138009781652	91.2132008255594	88.9187088076012	84.0664972758789	67.9767057722438
94.3592521122013	94.3027612752516	94.1248143203737	93.8018742027964	93.2847231403765	92.4756298545975	91.1682515722972	88.8615757135495	83.9827652764652	67.7960093876516
94.3306477304793	94.2738772929681	94.0950360852418	93.7704658530458	93.2506900881732	92.4374544672365	91.1232951276614	88.8044278743405	83.8989929240988	67.615061408649
94.3020407527416	94.2449907820231	94.0652553406478	93.7390548797269	93.2166539653885	92.3992748048119	91.0783314693155	88.7472652465966	83.8151801035077	67.4338606541668
94.2734311829835	94.2161017461347	94.035472089313	93.7076412831496	93.1826147678359	92.361090855995	91.0333605748875	88.6900877869071	83.7313266992111	67.2524059355031
94.2448190251874	94.1872101889954	94.0056863339125	93.6762250635599	93.1485724912589	92.3229026094001	90.9883824219695	88.6328954518284	83.647432595517	67.0706960562518
94.2162042833217	94.1583161142717	93.9758980770751	93.6448062211395	93.1145271313322	92.2847100535848	90.9433969881185	88.5756881978834	83.5634976765206	66.8887298122298
94.187586961341	94.1294195256036	93.946107321384	93.6133847560068	93.0804786836621	92.2465131770504	90.8984042508562	88.518465981561	83.4795218261023	66.7065059914038
94.1589670631849	94.1005204266044	93.916314069376	93.5819606682164	93.0464271437869	92.2083119682431	90.8534041876697	88.4612287593156	83.3955049279254	66.5240233738163
94.130344592778	94.0716188208601	93.8865183235416	93.5505339577604	93.0123725071781	92.1701064155539	90.8083967760112	88.4039764875671	83.3114468654347	66.3412807315107
94.1017195540289	94.0427147119292	93.8567200863251	93.519104624568	92.9783147692406	92.1318965073197	90.7633819932988	88.3467091226998	83.2273475218541	66.158276828456
94.07309195083	94.0138081033424	93.8269193601246	93.4876726685063	92.9442539253132	92.0936822318239	90.7183598169159	88.2894266210626	83.1432067801849	65.9750104204698
94.044461787057	93.9848989986021	93.7971161472918	93.4562380893803	92.9101899706697	92.0554635772964	90.6733302242122	88.2321289389682	83.0590245232039	65.791480255142
94.0158290665683	93.955987401182	93.7673104501318	93.4248008869335	92.8761229005191	92.0172405319148	90.6282931925035	88.1748160326928	82.9748006334612	65.607685071756
93.9871937932044	93.927073314527	93.7375022709034	93.3933610608482	92.8420527100061	91.9790130838046	90.5832486990718	88.1174878584758	82.8905349932788	65.4236236012103
93.9585559707876	93.8981567420526	93.7076916118191	93.3619186107455	92.8079793942123	91.9407812210397	90.5381967211657	88.0601443725191	82.8062274847479	65.239294565939
93.9299156031215	93.869237687145	93.6778784750446	93.3304735361862	92.7739029481558	91.902544931643	90.4931372360004	88.0027855309871	82.7218779897279	65.0546966798309
93.9012726939905	93.8403161531601	93.6480628626992	93.2990258366707	92.7398233667926	91.8643042035872	90.4480702207579	87.9454112900057	82.637486389844	64.8698286481486
93.8726272471592	93.8113921434238	93.6182447768559	93.2675755116393	92.705740645017	91.8260590247946	90.4029956525872	87.8880216056624	82.5530525664851	64.6846891674458
93.8439792663721	93.7824656612316	93.5884242195409	93.236122560473	92.6716547776617	91.7878093831383	90.3579135086044	87.8306164340057	82.4685764008025	64.4992769254849
93.8153287553532	93.753536709848	93.5586011927339	93.2046669824934	92.6375657594987	91.7495552664423	90.312823765893	87.7731957310447	82.3840577737076	64.3135906011522
93.7866757178054	93.7246052925064	93.528775698368	93.173208776963	92.6034735852398	91.7112966624819	90.2677264015036	87.7157594527486	82.2994965658701	64.1276288643739
93.7580201574101	93.6956714124089	93.4989477383299	93.1417479430857	92.5693782495372	91.6730335589845	90.2226213924546	87.6583075550464	82.2148926577162	63.9413903760296
93.7293620778268	93.6667350727259	93.4691173144597	93.1102844800073	92.5352797469835	91.6347659436297	90.1775087157318	87.6008399938265	82.1302459294268	63.754873787866
93.7007014826929	93.6377962765958	93.4392844285507	93.0788183868154	92.5011780721131	91.5964938040499	90.1323883482889	87.5433567249362	82.0455562609352	63.5680777424092
93.6720383756227	93.608855027125	93.4094490823501	93.0473496625398	92.4670732194019	91.558217127831	90.0872602670474	87.4858577041814	81.960823531926	63.381000872876
93.6433727602076	93.5799113273872	93.3796112775583	93.0158783061532	92.4329651832681	91.519935902512	90.0421244488969	87.4283428873261	81.8760476218325	63.1936418030841
93.6147046400153	93.5509651804235	93.3497710158292	92.9844043165712	92.3988539580727	91.4816501155864	89.9969808706949	87.3708122300919	81.7912284098353	63.0059991473625
93.5860340185897	93.522016589242	93.3199282987702	92.9529276926524	92.36473953812	91.443359754502	89.9518295092673	87.3132656881581	81.7063657748601	62.8180715104587
93.5573608994503	93.4930655568176	93.2900831279423	92.9214484331993	92.330621917658	91.4050648066615	89.9066703414079	87.2557032171605	81.6214595955764	62.6298574874472
93.5286852860918	93.4641120860918	93.2602355048601	92.889966536958	92.2965010908789	91.3667652594227	89.8615033438792	87.1981247726916	81.536509750395	62.4413556636354
93.5000071819839	93.4351561799725	93.2303854309917	92.8584820026189	92.2623770519195	91.3284611000991	89.816328493412	87.1405303103003	81.4515161174667	62.2525646144694
93.4713265905709	93.4061978413336	93.2005329077588	92.8269948288169	92.2282497948616	91.2901523159604	89.7711457667057	87.0829197854908	81.3664785746801	62.063482905438
93.442643515271	93.3772370730147	93.1706779365367	92.7955050141316	92.1941193137328	91.2518388942323	89.7259551404281	87.0252931537229	81.2813969996599	61.8741090919765
93.4139579594765	93.3482738778215	93.1408205186546	92.7640125570877	92.1599856025064	91.2135208220974	89.6807565912158	86.9676503704113	81.1962712697652	61.6844417193685
93.3852699265531	93.3193082585249	93.1109606553951	92.7325174561553	92.1258486551023	91.1751980866954	89.6355500956742	86.9099913909252	81.1111012620873	61.4944793226476
93.3565794198395	93.2903402178611	93.081098347995	92.7010197097501	92.0917084653871	91.1368706751234	89.5903356303774	86.852316170588	81.0258868534485	61.3042204264969
93.3278864426474	93.2613697585314	93.0512335976444	92.6695193162337	92.0575650271746	91.0985385744361	89.5451131718682	86.7946246646768	80.9406279203994	61.1136635451487
93.2991909982606	93.232396883202	93.0213664054876	92.6380162739142	92.0234183342264	91.0602017716466	89.4998826966586	86.7369168284223	80.855324339218	60.9228071822816
93.2704930899355	93.2034215945036	92.9914967726226	92.606510581046	91.9892683802522	91.021860253726	89.4546441812293	86.6791926170079	80.7699759859071	60.731649830918
93.2417927209	93.1744438950317	92.9616247001016	92.5750022358303	91.95511515891	90.9835140076044	89.4093976020303	86.6214519855697	80.684582736193	60.5401899733189
93.2130898943534	93.145463787346	92.9317501889305	92.5434912364155	91.9209586638067	90.9451630201708	89.3641429354802	86.5636948891962	80.5991444655236	60.348426080879
93.1843846134666	93.1164812739702	92.9018732400694	92.5119775808974	91.8867988884986	90.9068072782737	89.3188801579672	86.5059212829276	80.5136610490662	60.1563566140194
93.1556768813811	93.0874963573923	92.8719938544326	92.4804612673193	91.8526358264913	90.868446768721	89.2736092458483	86.4481311217554	80.4281323617062	59.9639800220798
93.1269667012089	93.0585090400639	92.8421120328883	92.4489422936726	91.8184694712408	90.8300814782807	89.2283301754497	86.3903243606225	80.342558278045	59.7712947432094
93.0982540760326	93.0295193244004	92.8122277762592	92.4174206578969	91.7842998161532	90.7917113936808	89.1830429230669	86.3325009544221	80.2569386723981	59.5782992042564
93.0695390089047	93.0005272127806	92.7823410853221	92.38589635788	91.7501268545855	90.7533365016102	89.1377474649646	86.2746608579982	80.1712734187938	59.3849918206563
93.0408215028474	92.9715327075468	92.7524519608083	92.3543693914589	91.7159505798457	90.7149567887181	89.0924437773767	86.2168040261443	80.0855623909706	59.191370996319
93.0121015608525	92.9425358110044	92.7225604034034	92.3228397564192	91.6817709851933	90.676572241615	89.0471318365065	86.1589304136037	79.999805462376	58.9974351235144
92.9833791858809	92.913536525422	92.6926664137475	92.291307450496	91.6475880638397	90.6381828468727	89.0018116185263	86.1010399750688	79.9140025061645	58.8031825827574
92.9546543808625	92.8845348530311	92.6627699924352	92.2597724713739	91.6134018089483	90.5997885910243	88.9564830995781	86.0431326651809	79.828153395196	58.6086117426903
92.9259271486958	92.855530796026	92.6328711400159	92.2282348166873	91.5792122136352	90.5613894605652	88.911146255773	85.9852084385297	79.7422580020333	58.4137209599655
92.8971974922481	92.8265243565637	92.6029698569935	92.1966944840207	91.5450192709691	90.5229854419523	88.8658010631915	85.9272672496529	79.6563161989413	58.2185085791255
92.8684654143545	92.7975155367639	92.5730661438268	92.1651514709087	91.5108229739721	90.4845765216053	88.8204474978834	85.8693090530362	79.5703278578843	58.0229729324818
92.8397309178184	92.7685043387085	92.5431600009293	92.1336057748367	91.4766233156196	90.446162685906	88.7750855358681	85.8113338031122	79.4842928505249	57.8271123399935
92.8109940054106	92.739490764442	92.5132514286694	92.1020573932408	91.4424202888409	90.4077439211993	88.729715153134	85.7533414542608	79.3982110482216	57.630925109143
92.7822546798698	92.710474815971	92.4833404273707	92.0705063235084	91.4082138865195	90.369320213793	88.6843363256392	85.6953319608085	79.3120823220274	57.4344095348109
92.7535129439017	92.6814564952642	92.4534269973116	92.0389525629778	91.3740041014933	90.3308915499582	88.638949029311	85.637305277028	79.2259065426878	57.2375638991502
92.7247688001791	92.6524358042524	92.4235111387258	92.0073961089393	91.3397909265548	90.2924579159291	88.5935532400462	85.5792613571378	79.1396835806391	57.0403864714575
92.696022251342	92.6234127448282	92.3935928518021	91.9758369586347	91.3055743544517	90.2540192979042	88.5481489337108	85.5212001553021	79.0534133060066	56.8428755080444
92.6672732999966	92.5943873188463	92.3636721366848	91.9442751092579	91.2713543778871	90.2155756820452	88.5027360861403	85.4631216256301	78.9670955886028	56.6450292521059
92.6385219487159	92.5653595281228	92.3337489934734	91.9127105579553	91.2371309895196	90.1771270544783	88.4573146731397	85.4050257221761	78.8807302979252	56.4468459335887
92.609768200039	92.5363293744355	92.303823422223	91.8811433018254	91.2029041819639	90.1386734012939	88.4118846704831	85.3469123989386	78.7943173031554	56.2483237690566
92.581012056471	92.5072968595241	92.273895422944	91.8495733379199	91.1686739477908	90.1002147085468	88.366446053914	85.2887816098604	78.7078564731562	56.0494609615557
92.5522535204831	92.4782619850893	92.2439649956027	91.8180006632433	91.1344402795275	90.0617509622566	88.3209987991455	85.2306333088279	78.6213476764708	55.8502557004768
92.5234925945122	92.4492247527936	92.214032140121	91.7864252747532	91.1002031696584	90.0232821484078	88.2755428818596	85.172467449671	78.5347907813203	55.6507061614172
92.4947292809604	92.4201851642605	92.1840968563767	91.7548471693608	91.0659626106244	89.9848082529496	88.2300782777081	85.1142839861629	78.4481856556021	55.4508105060403
92.4659635821955	92.3911432210751	92.1541591442033	91.723266343931	91.0317185948241	89.946329261797	88.1846049623116	85.056082872019	78.3615321668883	55.2505668819337
92.4371955005504	92.3620989247834	92.1242190033905	91.6916827952824	90.9974711146136	89.9078451608299	88.1391229112605	84.9978640608977	78.2748301824237	55.0499734224659
92.4084250383228	92.3330522768927	92.0942764336838	91.660096520188	90.9632201623068	89.8693559358941	88.093632100114	84.939627506399	78.1880795691238	54.8490282466412
92.3796521977757	92.3040032788712	92.0643314347852	91.6285075153749	90.9289657301758	89.8308615728011	88.0481325044008	84.8813731620647	78.1012801935736	54.6477294589526
92.3508769811363	92.2749519321484	92.0343840063527	91.5969157775249	90.894707810451	89.7923620573283	88.0026240996187	84.8231009813781	78.0144319220251	54.4460751492334
92.3220993905968	92.2458982381144	92.0044341480008	91.5653213032744	90.8604463953214	89.7538573752193	87.9571068612349	84.7648109177634	77.927534620396	54.2440633925071
92.2933194283135	92.2168421981204	91.9744818593001	91.533724089215	90.826181476935	89.7153475121837	87.9115807646857	84.7065029245856	77.8405881542676	54.0416922488352
92.2645370964071	92.1877838134784	91.9445271397781	91.5021241318935	90.7919130473986	89.6768324538979	87.8660457853763	84.6481769551499	77.7535923888832	53.8389597631635
92.2357523969625	92.1587230854612	91.9145699889189	91.4705214278118	90.7576410987787	89.6383121860046	87.8205018986814	84.5898329627016	77.6665471891463	53.6358639651666
92.2069653320284	92.1296600153025	91.8846104061629	91.4389159734278	90.7233656231012	89.5997866941133	87.7749490799445	84.5314709004259	77.5794524196184	53.4324028690903
92.1781759036176	92.1005946041964	91.8546483909079	91.407307765155	90.6890866123519	89.5612559638006	87.7293873044785	84.473090721447	77.4923079445178	53.2285744735926
92.1493841137064	92.071526853298	91.824683942508	91.3756967993629	90.6548040584764	89.5227199806097	87.683816547565	84.4146923788283	77.4051136277174	53.0243767615827
92.120589964235	92.0424567637228	91.7947170602748	91.3440830723775	90.620517953381	89.4841787300512	87.6382367844549	84.3562758255722	77.3178693327427	52.8198077000578
92.0917934571067	92.0133843365471	91.7647477434766	91.312466580481	90.5862282889321	89.4456321976032	87.5926479903679	84.2978410146191	77.2305749227708	52.6148652399383
92.0629945941887	91.9843095728078	91.734775991339	91.2808473199122	90.551935056957	89.407080368711	87.5470501404927	84.2393878988477	77.1432302606276	52.4095473159014
92.034193377311	91.9552324735021	91.7048018030451	91.2492252868669	90.5176382492441	89.3685232287875	87.501443209987	84.1809164310743	77.0558352087868	52.2038518462117
92.0053898082671	91.9261530395879	91.6748251777351	91.2176004774978	90.4833378575425	89.3299607632135	87.4558271739774	84.1224265640529	76.9683896293676	51.9977767325512
91.9765838888133	91.8970712719836	91.6448461145067	91.1859728879149	90.449033873563	89.2913929573375	87.4102020075592	84.0639182504745	76.880893384133	51.791319859846
91.9477756206692	91.8679871715682	91.6148646124152	91.1543425141855	90.414726288978	89.2528197964759	87.3645676857968	84.005391442967	76.7933463344882	51.5844790960922
91.9189650055169	91.8389007391809	91.5848806704738	91.1227093523346	90.3804150954215	89.2142412659134	87.318924183723	83.9468460940945	76.7057483414785	51.3772522921785
91.8901520450016	91.8098119756215	91.554894287653	91.0910733983449	90.3461002844895	89.1756573509029	87.2732714763397	83.8882821563578	76.6180992657877	51.1696372817078
91.861336740731	91.7807208816504	91.5249054628816	91.0594346481573	90.3117818477402	89.1370680366655	87.2276095386175	83.8296995821934	76.5303989677362	50.9616318808163
91.8325190942754	91.751627457988	91.494914195046	91.0277930976704	90.2774597766943	89.0984733083909	87.1819383454956	83.7710983239732	76.4426473072793	50.7532338879902
91.8036991071677	91.7225317053155	91.464920482991	90.9961487427417	90.2431340628349	89.0598731512374	87.1362578718817	83.7124783340047	76.3548441440051	50.5444410838806
91.7748767809033	91.6934336242743	91.4349243255192	90.9645015791868	90.2088046976078	89.0212675503318	87.0905680926525	83.6538395645303	76.2669893371332	50.3352512311163
91.7460521169398	91.6643332154665	91.4049257213919	90.9328516027801	90.174471672422	88.98265649077	87.0448689826529	83.5951819677271	76.1790827455124	50.1256620741143
91.7172251166971	91.6352304794541	91.3749246693282	90.9011988092551	90.1401349786495	88.9440399576166	86.9991605166965	83.5365054957067	76.091124227619	49.9156713388875
91.6883957815575	91.6061254167599	91.3449211680061	90.869543194304	90.1057946076255	88.9054179359052	86.9534426695655	83.4778101005148	76.0031136415553	49.7052767328516
91.6595641128653	91.577018027867	91.314915216062	90.8378847535785	90.0714505506488	88.8667904106388	86.9077154160105	83.4190957341309	75.9150508450475	49.4944759446279
91.630730111927	91.5479083132189	91.284906812091	90.8062234826897	90.0371027989819	88.8281573667892	86.8619787307505	83.3603623484681	75.8269356954439	49.2832666438453
91.601893780011	91.5187962732194	91.2548959546468	90.7745593772081	90.0027513438512	88.7895187892981	86.8162325884728	83.3016098953729	75.7387680497132	49.0716464809393
91.5730551183479	91.4896819082329	91.224882642242	90.742892432664	89.9683961764469	88.7508746630761	86.7704769638334	83.2428383266245	75.6505477644427	48.8596130869487
91.5442141281299	91.4605652185842	91.1948668733484	90.7112226445477	89.9340372879237	88.7122249730036	86.7247118314563	83.1840475939352	75.5622746958364	48.6471640733097
91.5153708105113	91.4314462045582	91.1648486463965	90.6795500083096	89.8996746694003	88.6735697039306	86.678937165934	83.1252376489496	75.4739486997133	48.4342970316484
91.4865251666082	91.4023248664008	91.1348279597762	90.6478745193602	89.8653083119603	88.6349088406768	86.633152941827	83.0664084432443	75.3855696315055	48.2210095335699
91.4576771974983	91.3732012043178	91.1048048118365	90.6161961730705	89.8309382066519	88.5962423680318	86.5873591336643	83.0075599283282	75.2971373462566	48.0072991304455
91.4288269042213	91.344075218476	91.0747792008859	90.5845149647721	89.7965643444879	88.5575702707549	86.5415557159429	82.9486920556416	75.2086516986194	47.7931633531974
91.3999742877784	91.3149469090023	91.0447511251921	90.5528308897572	89.7621867164464	88.5188925335756	86.495742663128	82.8898047765562	75.1201125428548	47.5785997120804
91.3711193491325	91.2858162759843	91.0147205829828	90.521143943279	89.7278053134706	88.4802091411934	86.449919949653	82.830898042375	75.0315197328295	47.3636056964619
91.342262089208	91.25668331947	90.9846875724448	90.4894541205519	89.6934201264689	88.441520078278	86.4040875499192	82.7719718043316	74.9428731220144	47.1481787745984
91.3134025088912	91.2275480394681	90.9546520917251	90.4577614167511	89.6590311463155	88.4028253294694	86.358245438296	82.7130260135907	74.8541725634826	46.9323163934101
91.2845406090295	91.1984104359478	90.9246141389303	90.4260658270136	89.6246383638498	88.3641248793779	86.312393589121	82.6540606212469	74.765417909908	46.7160159782525
91.2556763904321	91.1692705088389	90.894573712127	90.3943673464375	89.5902417698775	88.3254187125841	86.2665319766995	82.5950755783253	74.6766090135631	46.4992749326854
91.2268098538697	91.1401282580318	90.8645308093421	90.362665970083	89.5558413551697	88.2867068136393	86.2206605753048	82.5360708357806	74.5877457263175	46.2820906382392
91.1979410000744	91.1109836833776	90.8344854285622	90.3309616929717	89.521437110464	88.2479891670654	86.1747793591783	82.4770463444974	74.4988278996358	46.0644604541785
91.1690698297396	91.081836784688	90.8044375677346	90.2992545100875	89.487029026464	88.2092657573547	86.1288883025291	82.4180020552898	74.4098553845762	45.8463817172634
91.1401963435205	91.0526875617357	90.7743872247666	90.2675444163762	89.4526170938397	88.1705365689705	86.0829873795341	82.3589379189007	74.3208280317885	45.6278517415067
91.1113205420334	91.0235360142537	90.7443343975263	90.235831406746	89.4182013032277	88.1318015863469	86.0370765643383	82.2998538860024	74.2317456915122	45.4088678179299
91.082442425856	90.9943821419361	90.714279083842	90.2041154760674	89.3837816452312	88.0930607938888	85.9911558310541	82.2407499071959	74.1426082135751	45.1894272143152
91.0535619955276	90.9652259444378	90.6842212815029	90.1723966191735	89.3493581104202	88.054314175972	85.945225153762	82.1816259330104	74.053415447391	44.9695271749553
91.0246792515486	90.9360674213743	90.6541609882589	90.1406748308601	89.3149306893315	88.0155617169437	85.89928450651	82.1224819139039	73.9641672419584	44.7491649203997
90.9957941943809	90.9069065723223	90.6240982018206	90.1089501058858	89.2804993724691	87.9768034011218	85.8533338633139	82.0633178002621	73.8748634458586	44.5283376471985
90.9669068244479	90.8777433968192	90.59403291986	90.0772224389723	89.246064150304	87.9380392127955	85.8073731981573	82.0041335423989	73.7855039072536	44.307042527643
90.9380171421341	90.8485778943634	90.5639651400096	90.0454918248041	89.2116250132749	87.8992691362255	85.7614024849913	81.9449290905558	73.6960884738851	44.0852767095035
90.9091251477853	90.8194100644145	90.5338948598633	90.0137582580294	89.1771819517875	87.8604931556436	85.7154216977346	81.8857043949019	73.6066169930717	43.8630373157636
90.8802308417091	90.7902399063927	90.5038220769764	89.9820217332595	89.1427349562153	87.821711255253	85.6694308102737	81.8264594055334	73.5170893117081	43.6403214443522
90.8513342241738	90.7610674196798	90.4737467888654	89.9502822450693	89.1082840168994	87.7829234192285	85.6234297964625	81.767194072474	73.4275052762628	43.4171261678713
90.8224352954097	90.7318926036185	90.4436689930081	89.9185397879972	89.073829124149	87.7441296317164	85.5774186301226	81.707908345674	73.3378647327767	43.1934485333218
90.7935340556079	90.7027154575125	90.4135886868442	89.8867943565458	89.0393702682408	87.7053298768344	85.5313972850432	81.6486021750106	73.2481675268608	42.969285561825
90.7646305049212	90.673535980627	90.3835058677747	89.8550459451811	89.0049074394199	87.6665241386722	85.4853657349809	81.5892755102879	73.1584135036953	42.7446342483418
90.7357246434636	90.6443541721883	90.3534205331627	89.8232945483336	88.9704406278994	87.627712401291	85.4393239536599	81.5299283012359	73.068602508027	42.5194915613881
90.7068164713107	90.6151700313842	90.3233326803329	89.7915401603979	88.935969823861	87.588894648724	85.393271914772	81.4705604975114	72.9787343841683	42.2938544427469
90.6779059884992	90.5859835573635	90.2932423065719	89.7597827757326	88.9014950174544	87.5500708649761	85.3472095919763	81.411172048697	72.888808975995	42.0677198071775
90.6489931950274	90.5567947492368	90.2631494091285	89.7280223886611	88.8670161987982	87.5112410340242	85.3011369588996	81.3517629043014	72.7988261269449	41.8410845421205
90.6200780908549	90.527603606076	90.2330539852137	89.6962589934712	88.8325333579794	87.4724051398172	85.2550539891362	81.2923330137592	72.7087856800157	41.6139455074002
90.5911606759028	90.4984101269144	90.2029560320005	89.6644925844155	88.798046485054	87.433563166276	85.2089606562476	81.2328823264305	72.6186874777639	41.3862995349231
90.5622409500537	90.469214310747	90.1728555466244	89.6327231557114	88.7635555700467	87.3947150972939	85.162856933763	81.1734107916011	72.5285313623025	41.1581434283727
90.5333189131516	90.4400161565304	90.1427525261834	89.6009507015412	88.7290606029513	87.355860916736	85.1167427951792	81.1139183584823	72.4383171752997	40.9294739629011
90.5043945650019	90.4108156631829	90.1126469677378	89.5691752160522	88.6945615737307	87.3170006084399	85.0706182139603	81.0544049762106	72.3480447579771	40.7002878848171
90.4754679053717	90.3816128295844	90.0825388683108	89.5373966933571	88.660058472317	87.2781341562155	85.0244831635378	80.9948705938477	72.2577139511081	40.4705819112696
90.4465389339896	90.3524076545768	90.0524282248881	89.5056151275336	88.6255512886116	87.2392615438451	84.9783376173108	80.9353151603806	72.1673245950162	40.2403527299289
90.4176076505456	90.3232001369635	90.0223150344184	89.4738305126252	88.5910400124854	87.2003827550834	84.9321815486461	80.875738624721	72.0768765295731	40.0095969986627
90.3886740546914	90.2939902755101	89.9921992938131	89.4420428426407	88.5565246337787	87.1614977736576	84.8860149308776	80.8161409357057	71.9863695941976	39.7783113452095
90.3597381460404	90.264778068944	89.962080999947	89.4102521115547	88.5220051423016	87.1226065832675	84.8398377373071	80.7565220420963	71.8958036278536	39.5464923668467
90.3307999241675	90.2355635159546	89.9319601496575	89.3784583133074	88.4874815278339	87.0837091675857	84.7936499412035	80.6968818925791	71.8051784690485	39.3141366300564
90.3018593886093	90.2063466151935	89.9018367397456	89.3466614418051	88.4529537801252	87.0448055102571	84.7474515158037	80.6372204357652	71.7144939558316	39.0812406701858
90.2729165388642	90.1771273652743	89.8717107669755	89.3148614909201	88.4184218888952	87.0058955948998	84.701242434312	80.57753762019	71.6237499257927	38.8478009911041
90.2439713743923	90.1479057647728	89.8415822280748	89.2830584544907	88.3838858438335	86.9669794051046	84.6550226699001	80.5178333943138	71.5329462160604	38.6138140648554
90.2150238946153	90.118681812227	89.8114511197346	89.2512523263215	88.3493456346	86.9280569244351	84.6087921957075	80.4581077065213	71.4420826633002	38.3792763313069
90.186074098917	90.0894555061373	89.7813174386094	89.2194431001836	88.3148012508247	86.8891281364279	84.5625509848415	80.3983605051215	71.3511591037137	38.1441841977933
90.1571219866429	90.0602268449665	89.7511811813177	89.1876307698144	88.2802526821081	86.8501930245927	84.5162990103767	80.3385917383482	71.2601753730361	37.9085340387561
90.1281675571004	90.0309958271397	89.7210423444416	89.1558153289179	88.2456999180211	86.8112515724123	84.4700362453557	80.2788013543592	71.1691313065355	37.6723221953791
90.0992108095586	90.0017624510445	89.6909009245272	89.1239967711649	88.2111429481053	86.7723037633426	84.4237626627888	80.218989301237	71.078026739011	37.4355449752189
90.070251743249	89.9725267150313	89.6607569180843	89.0921750901929	88.1765817618728	86.7333495808128	84.3774782356541	80.1591555269884	70.9868615047912	37.198198651831
90.0412903573647	89.9432886174128	89.6306103215871	89.0603502796063	88.1420163488064	86.6943890082253	84.3311829368973	80.0992999795446	70.8956354377327	36.9602794643907
90.0123266510611	89.9140481564645	89.6004611314737	89.0285223329768	88.1074466983599	86.655422028956	84.2848767394325	80.0394226067613	70.8043483712187	36.7217836173093
89.9833606234556	89.8848053304247	89.5703093441467	88.9966912438427	88.0728727999581	86.6164486263541	84.2385596161412	79.9795233564185	70.7130001381577	36.4827072798457
89.9543922736275	89.8555601374945	89.5401549559727	88.9648570057101	88.0382946429967	86.5774687837425	84.1922315398733	79.9196021762208	70.6215905709817	36.2430465857118
89.9254216006188	89.826312575838	89.5099979632832	88.9330196120521	88.0037122168426	86.5384824844175	84.1458924834464	79.8596590137974	70.530119501645	36.0027976326733
89.8964486034331	89.7970626435819	89.4798383623737	88.9011790563094	87.9691255108339	86.4994897116491	84.0995424196466	79.7996938167019	70.4385867616229	35.7619564821453
89.8674732810368	89.7678103388162	89.4496761495048	88.86933533189	87.9345345142802	86.460490448681	84.053181321228	79.7397065324127	70.3469921819101	35.5205191587815
89.8384956323582	89.738555659594	89.4195113209015	88.83748843217	87.8999392164624	86.4214846787309	84.0068091609128	79.6796971083328	70.2553355930195	35.2784816500577
89.8095156562882	89.7092986039314	89.3893438727538	88.8056383504929	87.8653396066328	86.38247238499	83.9604259113918	79.6196654917902	70.1636168249807	35.0358399058502
89.7805333516801	89.6800391698079	89.3591738012165	88.7737850801702	87.8307356740155	86.3434535506238	83.9140315453242	79.5596116300377	70.0718357073389	34.7925898380068
89.7515487173495	89.650777355166	89.3290011024094	88.7419286144813	87.7961274078063	86.3044281587717	83.8676260353376	79.4995354702532	69.9799920691533	34.5487273199117
89.7225617520746	89.6215131579118	89.2988257724175	88.7100689466739	87.7615147971728	86.2653961925472	83.8212093540282	79.4394369595397	69.8880857389963	34.3042481860446
89.6935724545963	89.5922465759149	89.2686478072907	88.6782060699635	87.7268978312544	86.2263576350378	83.774781473961	79.3793160449257	69.7961165449518	34.0591482315314
89.6645808236179	89.5629776070081	89.2384672030446	88.6463399775343	87.6922764991625	86.1873124693057	83.7283423676697	79.3191726733649	69.7040843146141	33.8134232116887
89.6355868578053	89.5337062489879	89.2082839556598	88.6144706625385	87.6576507899808	86.1482606783871	83.681892007657	79.2590067917367	69.6119888750868	33.5670688415603
89.6065905557875	89.5044324996146	89.1780980610825	88.582598118097	87.6230206927648	86.1092022452928	83.6354303663944	79.1988183468464	69.5198300529816	33.3200807954462
89.5775919161559	89.4751563566119	89.1479095152243	88.5507223372992	87.5883861965427	86.0701371530079	83.5889574163228	79.1386072854253	69.4276076744172	33.0724547064229
89.5485909374649	89.4458778176676	89.1177183139628	88.5188433132033	87.5537472903147	86.0310653844924	83.5424731298522	79.0783735541308	69.335321565018	32.8241861658553
89.5195876182317	89.4165968804331	89.0875244531408	88.486961038836	87.5191039630537	85.9919869226808	83.495977479362	79.0181170995468	69.2429715499132	32.5752707228995
89.4905819569366	89.3873135425239	89.0573279285674	88.4550755071932	87.484456203705	85.9529017504826	83.4494704372012	78.9578378681838	69.1505574537358	32.3257038839959
89.4615739520226	89.3580278015193	89.0271287360174	88.4231867112395	87.4498040011865	85.9138098507818	83.4029519756883	78.8975358064794	69.0580791006213	32.0754811123526
89.4325636018961	89.3287396549628	88.9969268712314	88.3912946439087	87.4151473443891	85.8747112064377	83.3564220671118	78.8372108607981	68.9655363142069	31.8245978274177
89.4035509049264	89.2994491003622	88.9667223299165	88.3593992981039	87.3804862221763	85.8356058002847	83.3098806837299	78.7768629774322	68.8729289176306	31.5730494043405
89.374535859446	89.270156135189	88.9365151077457	88.3275006666971	87.3458206233846	85.7964936151322	83.2633277977712	78.7164921026015	68.7802567335302	31.3208311734213
89.3455184637508	89.2408607568796	88.9063052003582	88.2955987425301	87.3111505368235	85.7573746337648	83.2167633814343	78.6560981824541	68.6875195840425	31.0679384195477
89.3164987160996	89.2115629628344	88.8760926033599	88.2636935184139	87.2764759512755	85.7182488389428	83.1701874068885	78.5956811630665	68.5947172908023	30.8143663816181
89.287476614715	89.1822627504182	88.8458773123227	88.231784987129	87.2417968554966	85.6791162134017	83.1235998462737	78.5352409904439	68.5018496749417	30.5601102519507
89.2584521577828	89.1529601169604	88.8156593227854	88.1998731414258	87.2071132382158	85.6399767398527	83.0770006717003	78.4747776105208	68.4089165570893	30.3051651756772
89.2294253434522	89.1236550597552	88.7854386302532	88.1679579740243	87.1724250881357	85.6008304009827	83.0303898552502	78.4142909691612	68.3159177573695	30.0495262501202
89.2003961698362	89.094347576061	88.7552152301982	88.1360394776142	87.1377323939323	85.5616771794544	82.9837673689763	78.353781012159	68.2228530954019	29.7931885241535
89.1713646350111	89.0650376631013	88.7249891180591	88.1041176448554	87.1030351442551	85.5225170579064	82.9371331849027	78.2932476852388	68.1297223903004	29.5361469975429
89.142330737017	89.0357253180642	88.6947602892417	88.0721924683778	87.0683333277275	85.4833500189535	82.8904872750256	78.2326909340557	68.036525460673	29.278396620268
89.1132944738578	89.0064105381028	88.6645287391185	88.0402639407812	87.0336269329465	85.4441760451865	82.8438296113127	78.1721107041963	67.943262124621	29.0199322918217
89.0842558435012	88.9770933203351	88.6342944630293	88.0083320546359	86.9989159484831	85.4049951191725	82.797160165704	78.1115069411792	67.8499321997384	28.7607488604868
89.0552148438785	88.9477736618442	88.604057456281	87.9763968024824	86.9642003628823	85.3658072234552	82.7504789101119	78.0508795904552	67.7565355031117	28.5008411225874
89.0261714728852	88.9184515596781	88.5738177141476	87.9444581768315	86.929480164663	85.3266123405548	82.7037858164212	77.990228597408	67.6630718513196	28.2402038217137
88.9971257283808	88.8891270108502	88.5435752318708	87.9125161701648	86.8947553423185	85.2874104529679	82.6570808564898	77.9295539073549	67.5695410604322	27.9788316479173
88.9680776081886	88.8598000123391	88.5133300046592	87.8805707749343	86.8600258843162	85.2482015431685	82.6103640021486	77.8688554655471	67.4759429460111	27.716719236875
88.9390271100962	88.8304705610886	88.4830820276894	87.8486219835627	86.8252917790982	85.208985593607	82.5636352252021	77.8081332171706	67.3822773231092	27.453861169019
88.9099742318554	88.8011386540082	88.4528312961053	87.8166697884435	86.7905530150806	85.1697625867113	82.5168944974283	77.7473871073467	67.2885440062701	27.1902519686292
88.8809189711823	88.7718042879725	88.4225778050185	87.7847141819412	86.7558095806544	85.1305325048863	82.4701417905793	77.6866170811328	67.1947428095288	26.9258861028861
88.8518613257571	88.742467459822	88.3923215495084	87.7527551563912	86.7210614641855	85.0912953305146	82.4233770763816	77.6258230835228	67.1008735464107	26.6607579808792
88.8228012932247	88.7131281663627	88.3620625246224	87.7207927041	86.6863086540141	85.0520510459562	82.3766003265365	77.5650050594482	67.0069360299322	26.3948619525691
88.7937388711941	88.6837864043662	88.3318007253756	87.6888268173452	86.6515511384557	85.0127996335488	82.3298115127199	77.5041629537785	66.9129300726009	26.1281923076965
88.7646740572392	88.6544421705702	88.3015361467514	87.6568574883758	86.6167889058007	84.973541075608	82.2830106065834	77.4432967113222	66.8188554864152	25.8607432746357
88.7356068488982	88.6250954616779	88.2712687837011	87.6248847094121	86.5820219443147	84.9342753544277	82.2361975797541	77.3824062768276	66.7247120828651	25.5925090191863
88.7065372436742	88.5957462743588	88.2409986311443	87.5929084726459	86.5472502422384	84.8950024522798	82.1893724038354	77.3214915949836	66.6304996729321	25.3234836432976
88.6774652390349	88.5663946052481	88.2107256839689	87.5609287702404	86.512473787788	84.8557223514147	82.1425350504069	77.2605526104206	66.53621806709	25.0536611837195
88.6483908324129	88.5370404509473	88.1804499370311	87.5289455943307	86.4776925691551	84.8164350340614	82.0956854910253	77.1995892677112	66.4418670753048	24.7830356105735
88.6193140212055	88.5076838080242	88.1501713851558	87.4969589370236	86.4429065745069	84.7771404824276	82.0488236972242	77.1386015113716	66.3474465070356	24.5116008258347
88.5902348027751	88.4783246730124	88.1198900231361	87.4649687903975	86.4081157919863	84.7378386787003	82.0019496405153	77.0775892858619	66.2529561712353	24.2393506617181
88.5611531744491	88.4489630424124	88.089605845734	87.432975146503	86.3733202097122	84.6985296050452	81.9550632923883	77.0165525355878	66.1583958763511	23.9662788789587
88.53206913352	88.4195989126907	88.0593188476802	87.4009779973627	86.338519815779	84.6592132436079	81.9081646243112	76.9554912049013	66.0637654303251	23.6923791649755
88.5029826772454	88.3902322802805	88.0290290236743	87.3689773349713	86.3037145982577	84.6198895765132	81.8612536077313	76.8944052381017	65.9690646405959	23.4176451319072
88.4738938028483	88.3608631415815	87.9987363683845	87.3369731512958	86.2689045451951	84.5805585858659	81.8143302140755	76.8332945794369	65.8742933140986	23.142070314508
88.4448025075167	88.3314914929601	87.9684408764483	87.3049654382754	86.2340896446146	84.5412202537507	81.7673944147504	76.7721591731044	65.7794512572666	22.8656481678879
88.4157087884043	88.3021173307494	87.9381425424722	87.2729541878218	86.1992698845158	84.5018745622328	81.7204461811433	76.7109989632526	65.6845382760327	22.5883720650832
88.3866126426301	88.2727406512492	87.9078413610319	87.2409393918193	86.164445252875	84.4625214933576	81.6734854846226	76.6498138939822	65.5895541758298	22.3102352944382
88.3575140672786	88.2433614507264	87.8775373266723	87.2089210421247	86.1296157376453	84.4231610291514	81.6265122965382	76.5886039093471	65.4944987615931	22.0312310567796
88.3284130594	88.2139797254147	87.8472304339075	87.1768991305678	86.0947813267565	84.3837931516214	81.5795265882222	76.5273689533559	65.399371837761	21.7513524623609
88.2993096160101	88.184595471515	87.8169206772214	87.144873648951	86.0599420081154	84.3444178427561	81.5325283309892	76.4661089699734	65.3041732082766	21.4705925275537
88.2702037340905	88.1552086851951	87.7866080510672	87.1128445890497	86.0250977696059	84.3050350845254	81.4855174961375	76.4048239031217	65.2089026765901	21.1889441712571
88.2410954105884	88.1258193625902	87.7562925498677	87.0808119426123	85.9902485990894	84.265644858881	81.4384940549491	76.3435136966822	65.1135600456598	20.9064002109961
88.2119846424173	88.0964274998028	87.7259741680154	87.0487757013604	85.9553944844044	84.2262471477565	81.3914579786906	76.2821782944962	65.0181451179547	20.6229533586743
88.1828714264563	88.0670330929026	87.6956528998727	87.0167358569889	85.920535413367	84.186841933068	81.3444092386137	76.2208176403676	64.9226576954562	20.3385962159425
88.1537557595507	88.0376361379268	87.6653287397719	86.984692401166	85.8856713737713	84.1474291967141	81.2973478059562	76.1594316780634	64.8270975796602	20.053321269141
88.124637638512	88.0082366308802	87.635001682015	86.9526453255333	85.8508023533888	84.1080089205761	81.2502736519423	76.0980203513162	64.7314645715799	19.7671208837667
88.0955170601177	87.9788345677353	87.6046717208744	86.9205946217061	85.8159283399694	84.0685810865187	81.2031867477836	76.0365836038253	64.6357584717478	19.479987298411
88.0663940211117	87.9494299444319	87.5743388505925	86.8885402812732	85.781049321241	84.0291456763901	81.1560870646797	75.975121379259	64.5399790802186	19.1919126181071
88.0372685182042	87.920022756878	87.5440030653818	86.8564822957974	85.7461652849099	83.9897026720223	81.1089745738189	75.9136336212558	64.4441261965715	18.9028888070179
88.0081405480718	87.8906130009493	87.5136643594254	86.8244206568152	85.7112762186607	83.9502520552313	81.0618492463791	75.8521202734269	64.3481996199138	18.6129076803854
87.9790101073577	87.8612006724893	87.4833227268767	86.7923553558373	85.6763821101569	83.9107938078176	81.0147110535285	75.7905812793577	64.2521991488833	18.3219608956548
87.9498771926716	87.8317857673095	87.4529781618596	86.7602863843482	85.6414829470408	83.8713279115668	80.9675599664266	75.7290165826099	64.1561245816516	18.0300399426701
87.9207418005897	87.8023682811899	87.4226306584685	86.7282137338071	85.6065787169335	83.8318543482494	80.9203959562247	75.6674261267237	64.0599757159279	17.7371361328296
87.8916039276552	87.7729482098781	87.3922802107687	86.696137395647	85.5716694074355	83.7923730996215	80.8732189940672	75.6058098552196	63.9637523489619	17.4432405870689
87.862463570378	87.7435255490904	87.3619268127963	86.6640573612758	85.5367550061267	83.7528841474252	80.8260290510922	75.544167711601	63.8674542775478	17.1483442225238
87.8333207252347	87.7141002945113	87.3315704585579	86.6319736220758	85.5018355005663	83.7133874733889	80.7788260984326	75.482499639356	63.7710812980283	16.8524377377025
87.804175388669	87.6846724417935	87.3012111420315	86.5998861694039	85.4669108782936	83.6738830592276	80.7316101072167	75.42080558196	63.6746332062982	16.555511595973
87.7750275570918	87.6552419865586	87.2708488571661	86.5677949945919	85.4319811268274	83.6343708866437	80.6843810485697	75.3590854828781	63.5781097978089	16.2575560071393
87.7458772268808	87.6258089243964	87.2404835978816	86.5357000889466	85.397046233667	83.5948509373267	80.6371388936144	75.2973392855672	63.4815108675728	15.9585609068512
87.7167243943811	87.5963732508656	87.2101153580695	86.5036014437498	85.3621061862919	83.5553231929544	80.5898836134721	75.2355669334792	63.3848362101678	15.6585159335472
87.687569055905	87.5669349614937	87.1797441315924	86.4714990502584	85.3271609721621	83.5157876351929	80.5426151792642	75.1737683700626	63.2880856197418	15.3574104025857
87.658411207732	87.5374940517767	87.1493699122843	86.4393928997047	85.2922105787184	83.4762442456971	80.4953335621125	75.1119435387663	63.1912588900184	15.0552332771642
87.6292508461094	87.5080505171801	87.118992693951	86.4072829832963	85.2572549933826	83.4366930061114	80.448038733141	75.0500923830413	63.0943558143014	14.7519731355584
87.6000879672515	87.4786043531377	87.0886124703698	86.3751692922166	85.2222942035576	83.3971338980697	80.4007306634768	74.9882148463445	62.9973761854802	14.4476181341359
87.5709225673406	87.4491555550529	87.0582292352897	86.3430518176244	85.1873281966277	83.3575669031964	80.3534093242514	74.9263108721408	62.9003197960361	14.1421559655051
87.5417546425265	87.4197041182981	87.0278429824316	86.3109305506545	85.1523569599591	83.3179920031068	80.3060746866015	74.8643804039065	62.8031864380472	13.8355738110448
87.5125841889267	87.390250038215	86.9974537054882	86.2788054824177	85.1173804808994	83.2784091794071	80.2587267216709	74.8024233851325	62.7059759031951	13.5278582869293
87.4834112026265	87.3607933101145	86.9670613981245	86.2466766040006	85.0823987467788	83.2388184136958	80.2113654006113	74.740439759327	62.608687982771	13.2189953825923
87.4542356796792	87.3313339292771	86.9366660539772	86.2145439064662	85.0474117449095	83.1992196875636	80.1639906945839	74.6784294700192	62.5113224676819	12.9089703903793
87.4250576161061	87.3018718909526	86.9062676666557	86.1824073808541	85.0124194625865	83.1596129825939	80.1166025747605	74.6163924607624	62.413879148458	12.5977678248894
87.3958770078963	87.2724071903607	86.8758662297413	86.1502670181799	84.9774218870877	83.119998280364	80.0692010123253	74.5543286751378	62.316357815259	12.2853713302096
87.3666938510073	87.2429398226905	86.8454617367881	86.1181228094364	84.942419005674	83.0803755624452	80.0217859784759	74.4922380567575	62.2187582578818	11.9717635728717
87.3375081413649	87.213469783101	86.8150541813226	86.0859747455927	84.9074108055897	83.0407448104033	79.974357444425	74.4301205492684	62.121080265768	11.6569261179038
87.3083198748627	87.183997066721	86.7846435568437	86.0538228175951	84.8723972740629	83.0011060057997	79.926915381402	74.3679760963561	62.0233236280113	11.3408392847694
87.2791290473633	87.1545216686493	86.7542298568235	86.0216670163671	84.8373783983056	82.9614591301916	79.8794597606543	74.3058046417485	61.925488133366	11.0234819792641
87.2499356546973	87.1250435839548	86.7238130747065	85.9895073328091	84.8023541655141	82.921804165133	79.8319905534493	74.2436061292199	61.8275735702549	10.7048314965219
87.220739692664	87.0955628076763	86.6933932039104	85.9573437577993	84.767324562869	82.882141092175	79.7845077310755	74.1813805025949	61.7295797267784	10.3848632891078
87.1915411570315	87.0660793348229	86.6629702378259	85.9251762821931	84.7322895775361	82.8424698928668	79.7370112648446	74.1191277057527	61.6315063907229	10.0635506926712
87.1623400435362	87.0365931603742	86.6325441698169	85.893004896824	84.6972491966661	82.8027905487563	79.6895011260933	74.0568476826312	61.5333533495702	9.74086459967094
87.1331363478838	87.0071042792798	86.6021149932206	85.8608295925029	84.6622034073953	82.7631030413908	79.6419772861846	73.9945403772316	61.4351203905069	9.41677306912745
87.1039300657484	86.97761268646	86.5716827013474	85.8286503600193	84.6271521968457	82.7234073523178	79.5944397165101	73.9322057336227	61.3368073004346	9.09124085696874
87.0747211927732	86.9481183768058	86.5412472874814	85.7964671901405	84.5920955521255	82.6837034630857	79.5468883884917	73.8698436959458	61.2384138659791	8.76422884701544
87.0455097245707	86.9186213451785	86.5108087448803	85.7642800736124	84.5570334603293	82.6439913552447	79.4993232735835	73.8074542084191	61.1399398735018	8.43569335654187
87.0162956567221	86.8891215864105	86.4803670667754	85.7320890011595	84.5219659085386	82.6042710103473	79.4517443432738	73.7450372153426	61.04138510911	8.10558528199752
86.9870789847782	86.8596190953048	86.4499222463718	85.6998939634848	84.4868928838219	82.5645424099497	79.4041515690872	73.6825926611035	60.9427493586679	7.77384903890154
86.9578597042586	86.8301138666354	86.4194742768489	85.6676949512704	84.4518143732355	82.5248055356121	79.3565449225863	73.6201204901807	60.8440324078083	7.44042123365684
86.9286378106529	86.8006058951473	86.3890231513598	85.6354919551778	84.4167303638234	82.4850603688997	79.3089243753746	73.5576206471507	60.7452340419443	7.1052289818047
86.8994132994196	86.7710951755567	86.3585688630319	85.6032849658472	84.3816408426179	82.4453068913839	79.2612898990979	73.4950930766924	60.6463540462813	6.76818775349534
86.870186165987	86.7415817025509	86.3281114049669	85.5710739738989	84.3465457966401	82.4055450846428	79.2136414654469	73.4325377235931	60.5473922058301	6.42919857697574
86.840956405753	86.7120654707886	86.2976507702411	85.5388589699324	84.3114452129001	82.3657749302623	79.1659790461596	73.3699545327537	60.448348305419	6.08814435529463
86.8117240140853	86.6825464748998	86.2671869519051	85.5066399445275	84.2763390783975	82.3259964098372	79.1183026130235	73.307343449195	60.3492221297083	5.74488493430809
86.7824889863211	86.653024709486	86.2367199429843	85.4744168882439	84.2412273801218	82.2862095049721	79.0706121378778	73.2447044180632	60.2500134632028	5.3992503737215
86.7532513177678	86.6235001691204	86.206249736479	85.4421897916215	84.206110105053	82.2464141972823	79.0229075926165	73.1820373846365	60.1507220902673	5.05103156727211
86.7240110037027	86.5939728483478	86.1757763253642	85.409958645181	84.1709872401616	82.206610468395	78.9751889491904	73.1193422943309	60.0513477951406	4.69996683918155
86.6947680393731	86.5644427416847	86.1452997025901	85.3777234394236	84.1358587724095	82.1667982999501	78.9274561796098	73.0566190927071	59.9518903619509	4.34572222665837
86.6655224199963	86.5349098436198	86.1148198610822	85.3454841648317	84.1007246887504	82.1269776736018	78.8797092559473	72.9938677254764	59.8523495747321	3.98786145860903
86.6362741407602	86.5053741486133	86.0843367937411	85.3132408118686	84.0655849761301	82.0871485710192	78.8319481503407	72.9310881385085	59.7527252174397	3.6257983105326
86.6070231968228	86.475835651098	86.0538504934431	85.2809933709792	84.030439621487	82.0473109738876	78.7841728349952	72.8682802778376	59.6530170739683	3.2587170328259
86.5777695833124	86.4462943454784	86.0233609530399	85.2487418325901	83.9952886117527	82.00746486391	78.7363832821871	72.80544408967	59.5532249281699	2.88543062345617
86.548513295328	86.4167502261317	85.9928681653589	85.2164861871095	83.9601319338524	81.9676102228078	78.6885794642662	72.7425795203914	59.4533485638725	2.50410626230116
86.5192543279392	86.3872032874071	85.9623721232036	85.1842264249281	83.9249695747058	81.9277470323223	78.6407613536589	72.6796865165746	59.3533877649004	2.11166856532061
86.4899926761862	86.3576535236266	85.9318728193534	85.1519625364187	83.8898015212269	81.8878752742161	78.5929289228716	72.6167650249872	59.2533423150956	1.70226388733573
86.46072833508	86.3281009290847	85.9013702465638	85.1196945119369	83.8546277603252	81.8479949302742	78.5450821444934	72.5538149926001	59.1532119983414	1.26202926703035
86.4314612996023	86.2985454980485	85.8708643975667	85.0874223418212	83.8194482789062	81.8081059823052	78.4972209912	72.4908363665955	59.0529965985877	0.735840354528825
86.4021915647062	86.268987224758	85.8403552650704	85.0551460163931	83.7842630638714	81.7682084121432	78.4493454357567	72.4278290943767	58.9526958998796	0
86.3729191253153	86.2394261034262	85.8098428417599	85.0228655259577	83.7490721021196	81.7283022016486	78.4014554510218	72.3647931235764	58.8523096863877	0
86.3436439763248	86.2098621282389	85.7793271202968	84.9905808608038	83.7138753805473	81.6883873327098	78.3535510099506	72.3017284020675	58.751837742982	0
86.3143661126009	86.1802952933552	85.7488080933198	84.958292011204	83.6786728860489	81.6484637872449	78.3056320855987	72.2386348779953	58.6512798543413	0
86.2850855289812	86.1507255929073	85.7182857534444	84.9259989674155	83.6434646055179	81.6085315472028	78.257698651127	72.1755124997705	58.5506358060334	0
86.2558022202746	86.1211530210009	85.6877600932638	84.8937017196799	83.6082505258472	81.568590594565	78.2097506798056	72.1123612161077	58.4499053839629	0
86.2265161812619	86.0915775717152	85.6572311053481	84.8614002582236	83.5730306339299	81.5286409113473	78.1617881450188	72.0491809760369	58.3490883739754	0
86.197227406695	86.0619992391027	85.6266987822453	84.8290945732583	83.53780491666	81.4886824796015	78.1138110202708	71.9859717288985	58.2481845615723	0
86.1679358912981	86.0324180171899	85.5961631164811	84.7967846549813	83.502573360933	81.4487152814168	78.06581927919	71.9227334243268	58.1471937317066	0
86.1386416297666	86.0028338999769	85.5656241005588	84.7644704935755	83.4673359536467	81.4087392989224	78.0178128955331	71.8594660122281	58.0461156686359	0
86.1093446167683	85.9732468814379	85.5350817269603	84.7321520792102	83.4320926817019	81.3687545142884	77.9697918431878	71.7961694427544	57.944950155817	0
86.0800448469428	85.943656955521	85.5045359881453	84.6998294020409	83.3968435320032	81.3287609097287	77.9217560961747	71.7328436662768	57.8436969758307	0
86.0507423149019	85.9140641161485	85.4739868765522	84.6675024522103	83.3615884914599	81.2887584675018	77.8737056286477	71.6694886333584	57.7423559103271	0
86.0214370152295	85.884468357217	85.4434343845979	84.6351712198479	83.3263275469864	81.2487471699132	77.8256404148941	71.6061042947276	57.6409267399869	0
85.992128942482	85.8548696725977	85.4128785046782	84.6028356950711	83.2910606855034	81.208726999317	77.7775604293335	71.5426906012537	57.5394092444938	0
85.9628180911881	85.825268056136	85.3823192291678	84.5704958679851	83.2557878939388	81.168697938117	77.729465646516	71.4792475039234	57.4378032025145	0
85.9335044558491	85.7956635016521	85.3517565504208	84.5381517286833	83.220509159228	81.1286599687686	77.6813560411195	71.4157749538191	57.3361083916843	0
85.9041880309389	85.7660560029412	85.3211904607705	84.5058032672479	83.1852244683153	81.0886130737797	77.6332315879473	71.3522729020991	57.2343245885967	0
85.874868810904	85.736445553773	85.2906209525299	84.4734504737501	83.1499338081544	81.0485572357122	77.5850922619241	71.2887412999795	57.1324515687965	0
85.8455467901641	85.7068321478927	85.2600480179917	84.4410933382507	83.1146371657095	81.0084924371824	77.5369380380931	71.2251800987174	57.0304891067739	0
85.8162219631115	85.6772157790204	85.2294716494287	84.4087318508002	83.0793345279557	80.9684186608623	77.4887688916113	71.1615892495959	56.9284369759606	0
85.7868943241117	85.6475964408515	85.1988918390939	84.3763660014397	83.0440258818803	80.9283358894801	77.4405847977456	71.0979687039104	56.8262949487269	0
85.7575638675035	85.6179741270571	85.1683085792208	84.3439957802006	83.0087112144831	80.8882441058205	77.392385731869	71.0343184129562	56.7240627963796	0
85.7282305875988	85.5883488312838	85.1377218620235	84.3116211771059	82.9733905127778	80.8481432927255	77.3441716694554	70.9706383280169	56.6217402891593	0
85.6988944786829	85.5587205471537	85.107131679697	84.2792421821699	82.9380637637919	80.8080334330943	77.2959425860761	70.9069284003547	56.5193271962396	0
85.6695555350149	85.5290892682651	85.0765380244174	84.2468587853988	82.9027309545683	80.7679145098834	77.2476984573946	70.8431885812007	56.4168232857252	0
85.6402137508271	85.4994549881921	85.0459408883423	84.2144709767917	82.8673920721655	80.7277865061068	77.1994392591628	70.7794188217466	56.3142283246504	0
85.6108691203259	85.4698177004852	85.0153402636106	84.1820787463401	82.8320471036583	80.6876494048357	77.1511649672165	70.7156190731369	56.2115420789779	0
85.5815216376913	85.4401773986709	84.9847361423432	84.1496820840291	82.7966960361386	80.6475031891981	77.1028755574712	70.6517892864621	56.1087643135973	0
85.5521712970775	85.4105340762526	84.9541285166432	84.1172809798375	82.7613388567159	80.6073478423789	77.0545710059177	70.5879294127522	56.0058947923236	0
85.5228180926127	85.3808877267099	84.9235173785956	84.0848754237383	82.7259755525178	80.5671833476192	77.0062512886184	70.524039402971	55.9029332778956	0
85.4934620183994	85.3512383434994	84.8929027202686	84.0524654056991	82.6906061106908	80.5270096882157	76.9579163817031	70.4601192080107	55.7998795319742	0
85.4641030685142	85.3215859200546	84.8622845337125	84.0200509156827	82.6552305184006	80.4868268475202	76.909566261365	70.396168778687	55.6967333151409	0
85.4347412370085	85.2919304497862	84.8316628109613	83.9876319436474	82.6198487628327	80.4466348089392	76.8612009038574	70.3321880657349	55.5934943868954	0
85.4053765179081	85.2622719260819	84.8010375440319	83.9552084795473	82.5844608311926	80.4064335559327	76.8128202854898	70.2681770198044	55.4901625056543	0
85.3760089052135	85.232610342307	84.7704087249249	83.922780513333	82.5490667107066	80.3662230720138	76.7644243826242	70.2041355914567	55.3867374287483	0
85.3466383929003	85.2029456918045	84.7397763456251	83.8903480349519	82.5136663886216	80.3260033407479	76.7160131716723	70.1400637311609	55.2832189124208	0
85.3172649749189	85.1732779678948	84.7091403981008	83.8579110343485	82.4782598522062	80.2857743457515	76.6675866290915	70.0759613892909	55.1796067118247	0
85.2878886451947	85.1436071638767	84.6785008743053	83.8254695014653	82.4428470887504	80.2455360706918	76.6191447313824	70.011828516122	55.0759005810206	0
85.2585093976285	85.1139332730267	84.6478577661762	83.7930234262423	82.407428085566	80.2052884992851	76.5706874550854	69.9476650618288	54.972100272974	0
85.2291272260966	85.0842562885997	84.6172110656362	83.7605727986183	82.3720028299869	80.1650316152968	76.5222147767779	69.883470976482	54.8682055395529	0
85.1997421244507	85.0545762038293	84.586560764593	83.7281176085307	82.3365713093696	80.1247654025394	76.4737266730713	69.8192462100468	54.7642161315247	0
85.170354086518	85.0248930119273	84.5559068549401	83.6956578459164	82.3011335110928	80.0844898448723	76.4252231206088	69.7549907123798	54.6601317985537	0
85.1409631061019	84.9952067060847	84.5252493285565	83.6631935007116	82.2656894225579	80.0442049262002	76.3767040960623	69.690704433228	54.5559522891978	0
85.1115691769814	84.9655172794712	84.4945881773074	83.6307245628525	82.2302390311891	80.0039106304728	76.3281695761301	69.626387322226	54.4516773509058	0
85.0821722929117	84.935824725236	84.4639233930442	83.5982510222756	82.1947823244336	79.9636069416829	76.2796195375344	69.5620393288946	54.3473067300142	0
85.0527724476244	84.9061290365073	84.433254967605	83.5657728689182	82.1593192897615	79.9232938438661	76.2310539570193	69.4976604026392	54.2428401717437	0
85.0233696348272	84.8764302063933	84.4025828928147	83.5332900927184	82.1238499146656	79.8829713210994	76.1824728113481	69.4332504927481	54.1382774201963	0
84.9939638482046	84.8467282279815	84.3719071604852	83.5008026836156	82.0883741866621	79.8426393575002	76.1338760773016	69.3688095483911	54.0336182183514	0
84.9645550814176	84.8170230943397	84.3412277624161	83.468310631551	82.0528920932901	79.8022979372254	76.085263731676	69.304337518618	53.9288623080628	0
84.9351433281042	84.7873147985157	84.3105446903946	83.4358139264675	82.0174036221116	79.7619470444702	76.0366357512806	69.2398343523573	53.8240094300549	0
84.9057285818792	84.7576033335376	84.2798579361957	83.4033125583105	81.9819087607116	79.7215866634671	75.9879921129362	69.1752999984153	53.719059323919	0
84.8763108363349	84.7278886924141	84.2491674915828	83.3708065170276	81.946407496698	79.6812167784852	75.9393327934734	69.1107344054742	53.6140117281096	0
84.8468900850404	84.6981708681347	84.2184733483078	83.3382957925694	81.9108998177016	79.6408373738286	75.8906577697305	69.0461375220918	53.5088663799407	0
84.8174663215428	84.6684498536698	84.1877754981114	83.3057803748897	81.8753857113756	79.600448433836	75.8419670185521	68.9815092967	53.4036230155817	0
84.7880395393665	84.6387256419707	84.1570739327233	83.2732602539452	81.8398651653962	79.5600499428792	75.7932605167873	68.9168496776036	53.2982813700537	0
84.7586097320139	84.6089982259705	84.1263686438625	83.2407354196965	81.8043381674619	79.5196418853626	75.7445382412882	68.8521586129799	53.1928411772254	0
84.7291768929652	84.5792675985834	84.0956596232377	83.208205862108	81.7688047052934	79.4792242457219	75.6958001689088	68.7874360508773	53.0873021698086	0
84.6997410156787	84.5495337527057	84.0649468625472	83.1756715711478	81.7332647666337	79.4387970084229	75.6470462765026	68.7226819392148	52.9816640793547	0
84.6703020935914	84.5197966812155	84.0342303534798	83.1431325367887	81.6977183392479	79.3983601579614	75.5982765409225	68.6578962257806	52.8759266362499	0
84.6408601201182	84.490056376973	84.0035100877143	83.1105887490076	81.6621654109226	79.3579136788614	75.5494909390182	68.5930788582321	52.7700895697112	0
84.6114150886531	84.460312832821	83.9727860569202	83.0780401977862	81.6266059694663	79.3174575556747	75.5006894476358	68.5282297840943	52.664152607782	0
84.5819669925687	84.4305660415846	83.9420582527581	83.0454868731109	81.5910400027088	79.2769917729796	75.4518720436162	68.4633489507596	52.5581154773275	0
84.5525158252167	84.400815996072	83.9113266668795	83.0129287649733	81.5554674985012	79.2365163153805	75.403038703794	68.3984363054868	52.4519779040302	0
84.5230615799278	84.3710626890742	83.8805912909273	82.98036586337	81.5198884447154	79.1960311675065	75.3541894049962	68.3334917954006	52.3457396123856	0
84.4936042500123	84.3413061133654	83.8498521165361	82.9477981583031	81.4843028292442	79.155536314011	75.3053241240414	68.2685153674909	52.2394003256974	0
84.4641438287598	84.3115462617035	83.8191091353322	82.9152256397799	81.4487106400007	79.1150317395706	75.2564428377384	68.2035069686118	52.1329597660726	0
84.4346803094398	84.2817831268296	83.7883623389342	82.8826482978136	81.4131118649186	79.0745174288842	75.2075455228853	68.1384665454815	52.0264176544174	0
84.4052136853015	84.2520167014691	83.7576117189528	82.8500661224231	81.3775064919514	79.0339933666724	75.1586321562685	68.0733940446812	51.9197737104315	0
84.3757439495744	84.2222469783311	83.7268572669915	82.817479103633	81.3418945090722	78.9934595376765	75.1097027146618	68.008289412655	51.8130276526041	0
84.3462710954681	84.1924739501093	83.6960989746463	82.7848872314742	81.3062759042739	78.9529159266579	75.0607571748253	67.9431525957088	51.7061791982084	0
84.3167951161726	84.1626976094816	83.6653368335065	82.7522904959834	81.2706506655684	78.9123625183972	75.0117955135047	67.87798354001	51.5992280632968	0
84.2873160048587	84.1329179491108	83.6345708351543	82.7196888872037	81.2350187809866	78.8717992976934	74.9628177074303	67.812782191587	51.4921739626962	0
84.2578337546779	84.1031349616445	83.6038009711658	82.6870823951844	81.199380238578	78.8312262493633	74.9138237333163	67.7475484963285	51.3850166100024	0
84.2283483587628	84.0733486397153	83.5730272331102	82.6544710099811	81.1637350264107	78.7906433582406	74.8648135678595	67.6822823999831	51.2777557175753	0
84.1988598102271	84.0435589759416	83.542249612551	82.621854721656	81.1280831325706	78.7500506091754	74.8157871877393	67.6169838481586	51.1703909965334	0
84.169368102166	84.0137659629267	83.5114681010456	82.5892335202778	81.0924245451616	78.7094479870333	74.7667445696163	67.5516527863215	51.0629221567491	0
84.1398732276562	83.9839695932602	83.4806826901455	82.5566073959217	81.0567592523051	78.6688354766948	74.7176856901319	67.486289159797	50.955348906843	0
84.1103751797561	83.9541698595173	83.4498933713971	82.5239763386696	81.0210872421398	78.6282130630545	74.6686105259073	67.4208929137675	50.8476709541785	0
84.0808739515062	83.9243667542595	83.419100136341	82.4913403386101	80.9854085028211	78.5875807310207	74.619519053543	67.3554639932731	50.7398880048568	0
84.0513695359292	83.8945602700346	83.388302976513	82.4586993858384	80.9497230225213	78.5469384655144	74.5704112496182	67.2900023432107	50.631999763711	0
84.02186192603	83.8647503993772	83.3575018834436	82.4260534704567	80.9140307894289	78.506286251469	74.52128709069	67.2245079083333	50.5240059343011	0
83.9923511147961	83.8349371348084	83.3266968486589	82.3934025825737	80.8783317917487	78.4656240738296	74.4721465532927	67.1589806332499	50.4159062189079	0
83.9628370951977	83.8051204688365	83.29588786368	82.3607467123053	80.8426260177009	78.4249519175521	74.4229896139373	67.0934204624249	50.307700318528	0
83.9333198601882	83.7753003939568	83.2650749200238	82.328085849774	80.8069134555214	78.3842697676029	74.3738162491109	67.0278273401777	50.1993879328677	0
83.9037994027037	83.7454769026522	83.234258009203	82.2954199851092	80.7711940934612	78.3435776089582	74.3246264352762	66.9622012106821	50.0909687603376	0
83.874275715664	83.7156499873929	83.203437122726	82.2627491084471	80.7354679197864	78.3028754266037	74.2754201488707	66.8965420179658	49.9824424980466	0
83.8447487919722	83.6858196406373	83.1726122520975	82.230073209931	80.6997349227772	78.2621632055333	74.2261973663064	66.8308497059103	49.8738088417966	0
83.8152186245152	83.6559858548315	83.141783388818	82.1973922797109	80.6639950907285	78.2214409307496	74.1769580639689	66.7651242182502	49.7650674860762	0
83.7856852061639	83.6261486224098	83.110950524385	82.1647063079436	80.6282484119492	78.1807085872622	74.1277022182174	66.6993654985725	49.6562181240549	0
83.7561485297731	83.596307935795	83.080113650292	82.132015284793	80.5924948747615	78.1399661600883	74.0784298053837	66.6335734903169	49.5472604475774	0
83.7266085881822	83.5664637873984	83.0492727580295	82.0993192004297	80.5567344675014	78.0992136342512	74.0291408017722	66.5677481367745	49.4381941471577	0
83.6970653742147	83.5366161696201	83.0184278390847	82.0666180450312	80.5209671785179	78.0584509947806	73.9798351836589	66.5018893810881	49.3290189119726	0
83.6675188806792	83.5067650748492	82.9875788849417	82.0339118087817	80.4851929961728	78.0176782267114	73.9305129272913	66.4359971662513	49.2197344298562	0
83.6379691003689	83.4769104954638	82.9567258870819	82.0012004818724	80.4494119088405	77.9768953150837	73.8811740088878	66.370071435108	49.1103403872935	0
83.6084160260624	83.4470524238316	82.9258688369837	81.9684840545009	80.4136239049074	77.9361022449421	73.8318184046371	66.3041121303526	49.0008364694145	0
83.5788596505232	83.4171908523095	82.8950077261231	81.935762516872	80.3778289727724	77.8952990013354	73.7824460906982	66.2381191945288	48.8912223599877	0
83.5492999665006	83.3873257732445	82.8641425459733	81.9030358591969	80.3420271008455	77.8544855693159	73.7330570431997	66.1720925700297	48.781497741414	0
83.5197369667294	83.3574571789731	82.8332732880055	81.8703040716934	80.3062182775484	77.813661933939	73.6836512382391	66.1060321990971	48.6716622947206	0
83.4901706439303	83.3275850618222	82.8023999436883	81.8375671445861	80.270402491314	77.772828080263	73.6342286518832	66.0399380238213	48.5617156995546	0
83.46060099081	83.2977094141087	82.7715225044883	81.804825068106	80.2345797305858	77.7319839933484	73.5847892601667	65.9738099861404	48.4516576341764	0
83.4310280000617	83.2678302281401	82.7406409618701	81.7720778324909	80.1987499838182	77.6911296582574	73.5353330390928	65.9076480278401	48.3414877754537	0
83.4014516643647	83.2379474962144	82.7097553072962	81.7393254279848	80.1629132394756	77.6502650600539	73.4858599646319	65.8414520905532	48.2312057988548	0
83.3718719763851	83.2080612106205	82.6788655322275	81.7065678448382	80.1270694860325	77.6093901838028	73.436370012722	65.775222115759	48.1208113784421	0
83.3422889287758	83.1781713636381	82.6479716281231	81.6738050733079	80.0912187119732	77.5685050145694	73.3868631592679	65.7089580447833	48.0103041868658	0
83.3127025141767	83.1482779475383	82.6170735864403	81.6410371036573	80.0553609057916	77.5276095374195	73.3373393801409	65.6426598187976	47.899683895357	0
83.283112725215	83.1183809545831	82.5861713986352	81.6082639261557	80.0194960559907	77.4867037374185	73.2877986511787	65.5763273788186	47.7889501737215	0
83.2535195545051	83.0884803770263	82.5552650561623	81.5754855310787	79.9836241510825	77.4457875996313	73.2382409481848	65.5099606657083	47.6781026903329	0
83.223922994649	83.0585762071132	82.5243545504747	81.5427019087082	79.9477451795877	77.4048611091222	73.1886662469282	65.4435596201731	47.5671411121257	0
83.1943230382367	83.0286684370808	82.4934398730244	81.509913049332	79.9118591300354	77.3639242509539	73.1390745231433	65.3771241827634	47.456065104589	0
83.1647196778458	82.9987570591581	82.4625210152622	81.4771189432438	79.8759659909631	77.3229770101874	73.0894657525292	65.3106542938733	47.3448743317596	0
83.1351129060422	82.9688420655663	82.4315979686379	81.4443195807435	79.840065750916	77.282019371882	73.0398399107498	65.2441498937404	47.2335684562149	0
83.1055027153802	82.9389234485189	82.4006707246	81.4115149521366	79.8041583984471	77.2410513210945	72.9901969734332	65.1776109224449	47.1221471390665	0
83.0758890984022	82.9090012002215	82.3697392745964	81.3787050477346	79.768243922117	77.2000728428791	72.9405369161716	65.1110373199093	47.0106100399529	0
83.0462720476398	82.8790753128726	82.3388036100741	81.3458898578546	79.7323223104932	77.1590839222868	72.8908597145207	65.0444290258984	46.8989568170328	0
83.016651555613	82.8491457786633	82.3078637224792	81.3130693728193	79.6963935521505	77.1180845443655	72.841165344	64.9777859800182	46.7871871269781	0
82.987027614831	82.8192125897775	82.2769196032572	81.2802435829571	79.6604576356701	77.0770746941594	72.7914537800917	64.9111081217161	46.6753006249667	0
82.9574002177922	82.7892757383923	82.245971243853	81.2474124786017	79.62451454964	77.0360543567085	72.7417249982413	64.8443953902798	46.5632969646758	0
82.9277693569843	82.7593352166777	82.2150186357107	81.2145760500924	79.5885642826541	76.9950235170488	72.6919789738565	64.7776477248376	46.4511757982745	0
82.8981350248846	82.7293910167973	82.1840617702741	81.1817342877738	79.5526068233128	76.9539821602117	72.6422156823077	64.7108650643573	46.3389367764166	0
82.8684972139602	82.6994431309079	82.1531006389866	81.1488871819956	79.5166421602217	76.9129302712235	72.5924350989271	64.6440473476463	46.2265795482339	0
82.8388559166679	82.66949155116	82.1221352332911	81.1160347231129	79.4806702819926	76.8718678351054	72.5426371990088	64.5771945133507	46.1141037613285	0
82.8092111254546	82.6395362696978	82.0911655446301	81.0831769014857	79.444691177242	76.8307948368734	72.4928219578085	64.5103064999552	46.0015090617658	0
82.7795628327575	82.6095772786593	82.0601915644459	81.0503137074791	79.4087048345921	76.7897112615372	72.4429893505432	64.4433832457825	45.888795094067	0
82.7499110310041	82.5796145701766	82.0292132841805	81.0174451314631	79.3727112426696	76.7486170941011	72.3931393523908	64.3764246889929	45.7759615012022	0
82.7202557126124	82.5496481363758	81.9982306952759	80.9845711638126	79.3367103901061	76.7075123195627	72.3432719384902	64.3094307675839	45.6630079245824	0
82.6905968699913	82.5196779693773	81.9672437891738	80.9516917949072	79.3007022655375	76.666396922913	72.2933870839408	64.2424014193895	45.5499340040529	0
82.6609344955405	82.4897040612958	81.9362525573157	80.9188070151312	79.264686857604	76.6252708891365	72.2434847638025	64.1753365820801	45.4367393778849	0
82.6312685816506	82.4597264042405	81.9052569911432	80.8859168148734	79.2286641549501	76.5841342032104	72.193564953095	64.108236193162	45.323423682769	0
82.6015991207034	82.4297449903155	81.8742570820981	80.8530211845273	79.1926341462237	76.5429868501044	72.1436276267981	64.0411001899765	45.2099865538069	0
82.5719261050723	82.3997598116192	81.8432528216217	80.8201201144906	79.1565968200767	76.5018288147809	72.0936727598514	63.9739285097003	45.0964276245045	0
82.5422495271219	82.3697708602451	81.8122442011558	80.7872135951656	79.1205521651642	76.4606600821942	72.0437003271535	63.906721089344	44.9827465267636	0
82.5125693792087	82.3397781282816	81.7812312121421	80.7543016169585	79.0845001701446	76.4194806372907	71.9937103035628	63.8394778657526	44.868942890875	0
82.4828856536807	82.3097816078123	81.7502138460226	80.7213841702799	79.0484408236794	76.3782904650084	71.9437026638961	63.7721987756043	44.7550163455102	0
82.4531983428781	82.2797812909159	81.7191920942392	80.6884612455445	79.0123741144328	76.3370895502767	71.8936773829295	63.7048837554107	44.6409665177143	0
82.4235074391332	82.2497771696664	81.6881659482342	80.6555328331708	78.9763000310717	76.2958778780163	71.8436344353975	63.6375327415157	44.5267930328978	0
82.3938129347704	82.2197692361332	81.65713539945	80.6225989235813	78.9402185622656	76.2546554331389	71.7935737959928	63.5701456700954	44.4124955148291	0
82.3641148221066	82.1897574823814	81.6261004393295	80.5896595072024	78.904129696686	76.2134222005467	71.7434954393667	63.5027224771578	44.2980735856264	0
82.3344130934512	82.1597419004715	81.5950610593154	80.556714574464	78.8680334230067	76.1721781651328	71.6933993401279	63.4352630985417	44.1835268657503	0
82.3047077411063	82.1297224824599	81.5640172508512	80.5237641157999	78.8319297299031	76.1309233117804	71.6432854728435	63.3677674699171	44.0688549739956	0
82.2749987573667	82.0996992203986	81.5329690053804	80.4908081216472	78.7958186060527	76.0896576253628	71.5931538120376	63.3002355267838	43.9540575274834	0
82.2452861345204	82.069672106336	81.5019163143469	80.4578465824465	78.7597000401342	76.0483810907434	71.5430043321922	63.2326672044718	43.8391341416534	0
82.2155698648481	82.039641132316	81.470859169195	80.4248794886421	78.7235740208277	76.0070936927751	71.4928370077461	63.16506243814	43.7240844302556	0
82.1858499406242	82.0096062903789	81.4397975613693	80.3919068306811	78.6874405368147	75.9657954163004	71.4426518130953	63.0974211627766	43.6089080053425	0
82.1561263541161	81.9795675725613	81.4087314823149	80.3589285990141	78.6512995767774	75.9244862461509	71.3924487225925	63.0297433131977	43.493604477261	0
82.1263990975848	81.9495249708959	81.3776609234772	80.3259447840946	78.615151129399	75.8831661671477	71.3422277105471	62.9620288240475	43.3781734546444	0
82.0966681632849	81.9194784774119	81.346585876302	80.2929553763795	78.5789951833633	75.8418351641003	71.291988751225	62.8942776297976	43.262614544404	0
82.0669335434648	81.8894280841351	81.3155063322358	80.2599603663281	78.5428317273546	75.8004932218073	71.2417318188483	62.8264896647466	43.1469273517215	0
82.0371952303668	81.8593737830877	81.2844222827251	80.226959744403	78.5066607500575	75.7591403250556	71.191456887595	62.7586648630191	43.0311114800402	0
82.0074532162268	81.8293155662887	81.2533337192171	80.1939535010694	78.4704822401567	75.7177764586206	71.1411639315994	62.6908031585662	42.9151665310572	0
81.9777074932755	81.7992534257538	81.2222406331595	80.160941626795	78.4342961863371	75.6764016072658	71.0908529249511	62.622904485164	42.799092104715	0
81.9479580537372	81.7691873534954	81.1911430160003	80.1279241120504	78.3981025772832	75.6350157557426	71.0405238416956	62.5549687764137	42.6828877991934	0
81.918204889831	81.7391173415231	81.1600408591882	80.0949009473084	78.3619014016793	75.5936188887902	70.9901766558336	62.486995965741	42.566553210901	0
81.8884479937701	81.7090433818431	81.128934154172	80.0618721230445	78.3256926482092	75.5522109911357	70.9398113413209	62.4189859863953	42.4500879344668	0
81.8586873577626	81.6789654664592	81.0978228924015	80.0288376297362	78.2894763055561	75.5107920474933	70.8894278720686	62.3509387714499	42.3334915627322	0
81.8289229740111	81.6488835873718	81.0667070653264	79.9957974578636	78.2532523624022	75.4693620425646	70.8390262219425	62.2828542538006	42.2167636867423	0
81.799154834713	81.6187977365788	81.0355866643974	79.9627515979087	78.2170208074291	75.4279209610385	70.7886063647631	62.2147323661658	42.0999038957375	0
81.7693829320609	81.5887079060754	81.0044616810654	79.9297000403556	78.1807816293171	75.3864687875906	70.7381682743055	62.146573041086	41.9829117771453	0
81.739607258242	81.558614087854	80.9733321067817	79.8966427756906	78.1445348167452	75.3450055068833	70.687711924299	62.0783762109229	41.8657869165713	0
81.7098278054389	81.5285162739046	80.9421979329984	79.8635797944015	78.1082803583912	75.303531103566	70.6372372884274	62.0101418078591	41.7485288977913	0
81.6800445658295	81.4984144562145	80.9110591511678	79.8305110869783	78.0720182429313	75.2620455622741	70.5867443403282	61.9418697638979	41.6311373027425	0
81.6502575315868	81.4683086267688	80.8799157527429	79.7974366439126	78.0357484590401	75.2205488676295	70.5362330535931	61.8735600108621	41.5136117115148	0
81.6204666948794	81.43819877755	80.8487677291769	79.7643564556977	77.9994709953901	75.1790410042405	70.4857034017673	61.8052124803942	41.3959517023423	0
81.5906720478714	81.4080849005384	80.8176150719237	79.7312705128282	77.9631858406523	75.137521956701	70.4351553583495	61.7368271039553	41.2781568515948	0
81.5608735827226	81.377966987712	80.7864577724376	79.6981788058006	77.9268929834953	75.0959917095911	70.3845888967922	61.6684038128251	41.1602267337692	0
81.5310712915885	81.3478450310466	80.7552958221733	79.6650813251126	77.8905924125855	75.0544502474764	70.3340039905007	61.5999425381008	41.0421609214805	0
81.5012651666204	81.317719022516	80.7241292125861	79.631978061263	77.854284116587	75.0128975549083	70.2834006128335	61.5314432106971	40.9239589854534	0
81.4714551999655	81.2875889540918	80.6929579351315	79.5988690047523	77.8179680841615	74.9713336164234	70.2327787371023	61.4629057613454	40.8056204945134	0
81.4416413837671	81.2574548177435	80.6617819812656	79.5657541460818	77.781644303968	74.9297584165436	70.1821383365713	61.3943301205933	40.6871450155785	0
81.4118237101646	81.2273166054387	80.630601342445	79.5326334757541	77.7453127646628	74.8881719397762	70.1314793844575	61.3257162188042	40.5685321136496	0
81.3820021712935	81.1971743091433	80.5994160101265	79.4995069842727	77.7089734548991	74.8465741706133	70.0808018539302	61.2570639861564	40.4497813518027	0
81.3521767592857	81.167027920821	80.5682259757674	79.4663746621418	77.6726263633274	74.8049650935319	70.0301057181112	61.1883733526431	40.3308922911791	0
81.3223474662694	81.1368774324339	80.5370312308255	79.433236499867	77.6362714785949	74.7633446929937	69.9793909500744	61.1196442480714	40.2118644909776	0
81.2925142843692	81.1067228359422	80.5058317667588	79.400092487954	77.5999087893456	74.7217129534452	69.9286575228458	61.0508766020621	40.0926975084446	0
81.2626772057063	81.0765641233045	80.4746275750258	79.3669426169098	77.5635382842202	74.6800698593171	69.8779054094032	60.9820703440488	39.9733908988662	0
81.2328362223986	81.0464012864776	80.4434186470853	79.3337868772414	77.5271599518557	74.6384153950248	69.8271345826761	60.9132254032778	39.8539442155586	0
81.2029913265605	81.0162343174169	80.4122049743964	79.3006252594569	77.4907737808856	74.5967495449675	69.7763450155459	60.8443417088071	39.7343570098594	0
81.1731425103034	80.9860632080759	80.3809865484186	79.2674577540645	77.4543797599398	74.5550722935289	69.725536680845	60.7754191895061	39.6146288311189	0
81.1432897657352	80.9558879504069	80.3497633606117	79.2342843515728	77.4179778776442	74.5133836250763	69.6747095513573	60.706457774055	39.4947592266908	0
81.1134330849611	80.9257085363604	80.3185354024358	79.2011050424908	77.3815681226206	74.4716835239612	69.6238635998181	60.6374573909445	39.3747477419236	0
81.083572460083	80.8955249578856	80.2873026653512	79.1679198173276	77.3451504834871	74.4299719745186	69.5729987989132	60.5684179684745	39.2545939201513	0
81.0537078832	80.8653372069303	80.2560651408185	79.1347286665927	77.3087249488572	74.3882489610672	69.5221151212798	60.4993394347545	39.1342973026844	0
81.0238393464085	80.8351452754408	80.2248228202986	79.1015315807954	77.2722915073404	74.346514467909	69.4712125395055	60.4302217177023	39.0138574288013	0
80.9939668418016	80.8049491553622	80.1935756952526	79.068328550445	77.2358501475417	74.3047684793297	69.4202910261286	60.3610647450437	38.8932738357389	0
80.9640903614703	80.7747488386382	80.1623237571419	79.0351195660509	77.1994008580615	74.263010979598	69.3693505536377	60.2918684443123	38.7725460586834	0
80.9342098975024	80.7445443172111	80.1310669974278	79.0019046181222	77.1629436274955	74.2212419529658	69.3183910944719	60.2226327428481	38.6516736307619	0
80.9043254419834	80.7143355830223	80.0998054075721	78.9686836971679	77.126478444435	74.179461383668	69.2674126210206	60.1533575677977	38.5306560830327	0
80.8744369869962	80.6841226280116	80.0685389790365	78.9354567936966	77.0900052974661	74.1376692559226	69.2164151056227	60.0840428461134	38.4094929444766	0
80.8445445246211	80.653905444118	80.037267703283	78.9022238982166	77.0535241751701	74.0958655539302	69.1653985205675	60.0146885045525	38.2881837419877	0
80.8146480469362	80.6236840232789	80.0059915717738	78.8689850012357	77.0170350661232	74.0540502618741	69.1143628380939	59.9452944696772	38.166728000364	0
80.7847475460171	80.593458357431	79.9747105759708	78.8357400932612	76.9805379588966	74.0122233639203	69.0633080303904	59.8758606678534	38.0451252422991	0
80.7548430139372	80.5632284385098	79.9434247073365	78.8024891647998	76.9440328420562	73.9703848442172	69.0122340695948	59.8063870252505	37.9233749883723	0
80.7249344427674	80.5329942584495	79.9121339573329	78.7692322063577	76.9075197041622	73.9285346868956	68.9611409277946	59.736873467841	37.8014767570397	0
80.6950218245767	80.5027558091835	79.8808383174225	78.7359692084402	76.8709985337699	73.8866728760686	68.9100285770262	59.6673199213992	37.6794300646253	0
80.6651051514319	80.4725130826441	79.8495377790675	78.7027001615518	76.8344693194286	73.8447993958314	68.8588969892753	59.5977263115015	37.5572344253119	0
80.6351844153975	80.4422660707627	79.8182323337303	78.6694250561962	76.7979320496822	73.8029142302612	68.8077461364764	59.5280925635251	37.4348893511315	0
80.6052596085364	80.4120147654695	79.786921972873	78.6361438828763	76.7613867130689	73.7610173634175	68.7565759905127	59.4584186026478	37.3123943519567	0
80.5753307229091	80.3817591586941	79.7556066879578	78.6028566320937	76.7248332981208	73.7191087793413	68.7053865232164	59.3887043538473	37.1897489354913	0
80.5453977505743	80.3514992423649	79.7242864704469	78.5695632943492	76.6882717933643	73.6771884620554	68.6541777063679	59.3189497419007	37.0669526072611	0
80.5154606835889	80.3212350084094	79.6929613118023	78.5362638601424	76.6517021873196	73.6352563955645	68.6029495116963	59.2491546913835	36.9440048706052	0
80.4855195140078	80.2909664487543	79.6616312034857	78.5029583199716	76.6151244685011	73.5933125638546	68.5517019108786	59.1793191266696	36.8209052266662	0
80.4555742338844	80.2606935553256	79.6302961369589	78.4696466643339	76.5785386254166	73.5513569508934	68.5004348755404	59.1094429719302	36.6976531743818	0
80.4256248352699	80.2304163200481	79.5989561036834	78.4363288837252	76.5419446465679	73.5093895406299	68.4491483772548	59.0395261511335	36.574248210475	0
80.3956713102142	80.2001347348461	79.5676110951205	78.4030049686397	76.5053425204503	73.4674103169942	68.3978423875433	58.9695685880439	36.4506898294456	0
80.3657136507653	80.1698487916427	79.5362611027312	78.3696749095705	76.4687322355526	73.4254192638979	68.3465168778747	58.8995702062217	36.3269775235605	0
80.3357518489697	80.1395584823606	79.5049061179764	78.3363386970088	76.4321137803572	73.3834163652335	68.2951718196656	58.8295309290219	36.2031107828452	0
80.3057858968722	80.1092637989215	79.4735461323165	78.3029963214445	76.3954871433396	73.3414016048746	68.2438071842801	58.7594506795942	36.0790890950741	0
80.275815786516	80.0789647332463	79.4421811372119	78.2696477733657	76.3588523129688	73.2993749666756	68.1924229430297	58.6893293808821	35.9549119457619	0
80.245841509943	80.0486612772552	79.4108111241223	78.2362930432589	76.3222092777069	73.2573364344718	68.1410190671731	58.6191669556221	35.8305788181543	0
80.2158630591936	80.0183534228677	79.3794360845073	78.2029321216086	76.2855580260092	73.2152859920794	68.0895955279158	58.5489633263437	35.706089193219	0
80.1858804263064	79.9880411620025	79.348056009826	78.1695649988978	76.2488985463238	73.1732236232949	68.0381522964108	58.4787184153681	35.5814425496367	0
80.1558936033191	79.9577244865776	79.316670891537	78.1361916656072	76.212230827092	73.1311493118958	67.9866893437575	58.4084321448077	35.4566383637917	0
80.1259025822676	79.9274033885102	79.2852807210988	78.1028121122159	76.1755548567478	73.0890630416396	67.9352066410022	58.3381044365659	35.3316761097636	0
80.0959073551867	79.8970778597169	79.2538854899689	78.0694263292006	76.138870623718	73.0469647962646	67.8837041591377	58.2677352123361	35.2065552593175	0
80.0659079141098	79.8667478921135	79.2224851896048	78.0360343070363	76.1021781164222	73.0048545594893	67.8321818691034	58.1973243936011	35.0812752818957	0
80.035904251069	79.8364134776153	79.1910798114632	78.0026360361955	76.0654773232726	72.9627323150122	67.7806397417848	58.1268719016326	34.9558356446083	0
80.0058963580952	79.8060746081365	79.1596693470004	77.9692315071488	76.0287682326737	72.9205980465123	67.7290777480138	58.0563776574903	34.8302358122243	0
79.9758842272181	79.7757312755911	79.1282537876718	77.9358207103644	75.992050833023	72.8784517376484	67.6774958585682	57.9858415820217	34.7044752471631	0
79.945867850466	79.7453834718922	79.0968331249327	77.902403636308	75.9553251127098	72.8362933720595	67.625894044172	57.9152635958611	34.578553409485	0
79.9158472198663	79.7150311889521	79.0654073502372	77.8689802754432	75.9185910601162	72.7941229333642	67.5742722754947	57.8446436194289	34.4524697568826	0
79.885822327445	79.6846744186827	79.0339764550393	77.835550618231	75.8818486636162	72.7519404051613	67.5226305231518	57.7739815729313	34.3262237446723	0
79.8557931652272	79.654313152995	79.0025404307919	77.8021146551299	75.8450979115763	72.709745771029	67.4709687577041	57.7032773763595	34.1998148257849	0
79.8257597252366	79.6239473837996	78.9710992689473	77.7686723765959	75.8083387923547	72.6675390145254	67.419286949658	57.6325309494889	34.0732424507571	0
79.7957219994962	79.5935771030061	78.939652960957	77.7352237730824	75.771571294302	72.625320119188	67.3675850694652	57.5617422118787	33.9465060677229	0
79.7656799800276	79.5632023025238	78.9082014982719	77.70176883504	75.7347954057607	72.5830890685341	67.3158630875226	57.4909110828709	33.8196051224045	0
79.7356336588515	79.5328229742611	78.8767448723419	77.6683075529167	75.6980111150649	72.5408458460601	67.2641209741721	57.42003748159	33.692539058104	0
79.7055830279876	79.5024391101258	78.8452830746162	77.6348399171577	75.6612184105409	72.498590435242	67.2123586997005	57.3491213269422	33.5653073156945	0
79.6755280794547	79.4720507020251	78.8138160965429	77.6013659182054	75.6244172805065	72.456322819535	67.1605762343396	57.2781625376148	33.4379093336116	0
79.6454688052702	79.4416577418655	78.7823439295695	77.567885546499	75.5876077132712	72.4140429823735	67.1087735482658	57.2071610320753	33.3103445478448	0
79.6154051974511	79.4112602215528	78.7508665651424	77.5343987924752	75.5507896971363	72.371750907171	67.0569506116	57.1361167285711	33.1826123919288	0
79.5853372480129	79.3808581329923	78.7193839947071	77.5009056465674	75.5139632203944	72.3294465773203	67.0051073944076	57.0650295451285	33.0547122969354	0
79.5552649489707	79.3504514680885	78.6878962097082	77.4674060992061	75.4771282713298	72.2871299761929	66.9532438666984	56.9938993995523	32.9266436914647	0
79.5251882923383	79.3200402187452	78.656403201589	77.4339001408186	75.440284838218	72.2448010871393	66.9013599984264	56.9227262094249	32.7984060016367	0
79.4951072701286	79.2896243768657	78.6249049617921	77.400387761829	75.403432909326	72.202459893489	66.8494557594895	56.8515098921057	32.6699986510832	0
79.4650218743538	79.2592039343525	78.5934014817588	77.3668689526582	75.3665724729121	72.1601063785503	66.7975311197297	56.7802503647307	32.5414210609391	0
79.4349320970252	79.2287788831074	78.5618927529294	77.3333437037239	75.3297035172258	72.1177405256099	66.7455860489329	56.7089475442113	32.4126726498346	0
79.404837930153	79.1983492150316	78.530378766743	77.2998120054406	75.2928260305075	72.0753623179334	66.6936205168285	56.6376013472341	32.2837528338865	0
79.3747393657468	79.1679149220256	78.4988595146376	77.2662738482191	75.2559400009892	72.032971738765	66.6416344930897	56.5662116902599	32.1546610266903	0
79.3446363958153	79.1374759959893	78.4673349880501	77.232729222467	75.2190454168936	71.9905687713273	66.589627947333	56.4947784895231	32.0253966393122	0
79.3145290123661	79.1070324288216	78.4358051784159	77.1991781185883	75.1821422664343	71.9481533988214	66.5376008491184	56.4233016610312	31.8959590802807	0
79.2844172074064	79.0765842124211	78.4042700771694	77.1656205269837	75.145230537816	71.9057256044267	66.4855531679491	56.351781120564	31.7663477555787	0
79.2543009729423	79.0461313386854	78.3727296757436	77.1320564380501	75.1083102192342	71.8632853713012	66.4334848732712	56.2802167836725	31.6365620686358	0
79.224180300979	79.0156737995115	78.3411839655702	77.0984858421809	75.0713812988753	71.8208326825806	66.3813959344741	56.2086085656791	31.5066014203199	0
79.1940551835212	78.9852115867956	78.3096329380797	77.0649087297656	75.0344437649162	71.7783675213794	66.3292863208898	56.1369563816759	31.3764652089301	0
79.1639256125726	78.9547446924332	78.2780765847009	77.0313250911904	74.9974976055247	71.7358898707897	66.2771560017932	56.0652601465249	31.2461528301879	0
79.1337915801361	78.9242731083192	78.2465148968616	76.9977349168373	74.9605428088589	71.693399713882	66.2250049464018	55.9935197748567	31.1156636772306	0
79.1036530782139	78.8937968263475	78.2149478659879	76.9641381970847	74.923579363068	71.6508970337047	66.1728331238756	55.9217351810699	30.9849971406026	0
79.0735100988073	78.8633158384114	78.1833754835044	76.930534922307	74.8866072562911	71.608381813284	66.1206405033169	55.8499062793307	30.8541526082486	0
79.0433626339168	78.8328301364033	78.1517977408344	76.896925082875	74.8496264766582	71.5658540356241	66.0684270537704	55.7780329835717	30.7231294655056	0
79.0132106755424	78.8023397122151	78.1202146293996	76.8633086691551	74.8126370122895	71.5233136837071	66.0161927442228	55.7061152074919	30.5919270950956	0
78.983054215683	78.7718445577375	78.0886261406201	76.8296856715099	74.7756388512955	71.4807607404925	65.9639375436031	55.6341528645552	30.460544877118	0
78.9528932463368	78.7413446648608	78.0570322659145	76.796056080298	74.7386319817771	71.4381951889179	65.9116614207818	55.5621458679903	30.3289821890425	0
78.9227277595013	78.7108400254742	78.0254329966997	76.7624198858738	74.7016163918254	71.3956170118983	65.8593643445715	55.4900941307895	30.1972384057018	0
78.8925577471732	78.6803306314661	77.9938283243909	76.7287770785876	74.6645920695216	71.3530261923262	65.8070462837264	55.4179975657084	30.065312899284	0
78.8623832013485	78.6498164747243	77.9622182404018	76.6951276487855	74.6275590029371	71.3104227130718	65.7547072069423	55.3458560852651	29.9332050393258	0
78.8322041140222	78.6192975471354	77.9306027361444	76.6614715868092	74.5905171801333	71.2678065569827	65.7023470828563	55.2736696017392	29.8009141927054	0
78.8020204771887	78.5887738405855	77.8989818030286	76.6278088829963	74.5534665891617	71.2251777068838	65.6499658800469	55.2014380271715	29.6684397236353	0
78.7718322828417	78.5582453469595	77.8673554324631	76.5941395276802	74.5164072180638	71.1825361455773	65.5975635670338	55.1291612733628	29.5357809936553	0
78.741639522974	78.5277120581416	77.8357236158543	76.5604635111895	74.4793390548708	71.1398818558429	65.5451401122779	55.0568392518737	29.4029373616258	0
78.7114421895776	78.4971739660151	77.8040863446071	76.5267808238486	74.442262087604	71.0972148204373	65.4926954841809	54.9844718740234	29.2699081837207	0
78.6812402746437	78.4666310624623	77.7724436101243	76.4930914559777	74.4051763042745	71.0545350220945	65.4402296510854	54.9120590508893	29.136692813421	0
78.6510337701629	78.4360833393646	77.740795403807	76.459395397892	74.3680816928831	71.0118424435256	65.3877425812748	54.8396006933061	29.0032906015076	0
78.6208226681248	78.4055307886025	77.7091417170543	76.4256926399025	74.3309782414201	70.9691370674187	65.3352342429731	54.7670967118652	28.8697008960549	0
78.5906069605182	78.3749734020554	77.6774825412634	76.3919831723154	74.293865937866	70.9264188764389	65.2827046043447	54.6945470169138	28.7359230424242	0
78.5603866393314	78.3444111716019	77.6458178678294	76.3582669854325	74.2567447701904	70.8836878532283	65.2301536334947	54.6219515185542	28.6019563832569	0
78.5301616965516	78.3138440891196	77.6141476881456	76.3245440695506	74.2196147263527	70.8409439804059	65.177581298468	54.5493101266433	28.4678002584685	0
78.4999321241653	78.2832721464849	77.582471993603	76.2908144149622	74.182475794302	70.7981872405676	65.1249875672501	54.4766227507915	28.3334540052414	0
78.469697914158	78.2526953355734	77.5507907755908	76.2570780119545	74.1453279619765	70.7554176162858	65.0723724077664	54.4038893003623	28.1989169580193	0
78.4394590585148	78.2221136482595	77.5191040254958	76.2233348508103	74.108171217304	70.71263509011	65.0197357878821	54.3311096844712	28.0641884485003	0
78.4092155492195	78.1915270764166	77.487411734703	76.1895849218076	74.071005548202	70.6698396445663	64.9670776754024	54.2582838119852	27.9292678056307	0
78.3789673782554	78.1609356119172	77.455713894595	76.1558282152191	74.0338309425768	70.6270312621572	64.9143980380722	54.1854115915222	27.7941543555987	0
78.3487145376048	78.1303392466324	77.4240104965522	76.1220647213129	73.9966473883243	70.5842099253622	64.8616968435759	54.1124929314499	27.6588474218282	0
78.3184570192492	78.0997379724325	77.3923015319531	76.0882944303521	73.9594548733298	70.5413756166369	64.8089740595374	54.0395277398851	27.5233463249726	0
78.2881948151692	78.0691317811863	77.3605869921735	76.0545173325947	73.9222533854675	70.4985283184138	64.75622965352	53.9665159246933	27.3876503829086	0
78.2579279173446	78.038520664762	77.3288668685873	76.0207334182938	73.8850429126009	70.4556680131015	64.7034635930263	53.8934573934875	27.2517589107298	0
78.2276563177542	78.0079046150261	77.2971411525658	75.9869426776971	73.8478234425827	70.4127946830851	64.650675845498	53.8203520536277	27.1156712207407	0
78.1973800083761	77.9772836238443	77.2654098354781	75.9531451010476	73.8105949632546	70.3699083107262	64.5978663783159	53.7471998122201	26.9793866224506	0
78.1670989811873	77.9466576830809	77.2336729086909	75.9193406785828	73.7733574624474	70.3270088783626	64.5450351587995	53.6740005761164	26.8429044225672	0
78.136813228164	77.9160267845992	77.2019303635687	75.8855294005352	73.7361109279807	70.2840963683082	64.4921821542075	53.600754251913	26.7062239249905	0
78.1065227412815	77.8853909202609	77.1701821914732	75.8517112571319	73.6988553476634	70.2411707628533	64.4393073317369	53.5274607459499	26.5693444308066	0
78.0762275125142	77.8547500819269	77.138428383764	75.8178862385948	73.661590709293	70.1982320442643	64.3864106585237	53.4541199643107	26.4322652382816	0
78.0459275338354	77.8241042614566	77.1066689317979	75.7840543351405	73.6243170006562	70.1552801947838	64.3334921016419	53.3807318128211	26.2949856428547	0
78.0156227972175	77.793453450708	77.0749038269294	75.7502155369802	73.5870342095282	70.1123151966302	64.2805516281044	53.3072961970484	26.1575049371328	0
77.9853132946322	77.7627976415381	77.0431330605103	75.7163698343197	73.5497423236732	70.0693370319982	64.227589204862	53.2338130223009	26.0198224108832	0
77.9549990180499	77.7321368258024	77.0113566238901	75.6825172173595	73.5124413308441	70.0263456830584	64.1746047988038	53.160282193627	25.8819373510277	0
77.92467995944	77.701470995355	76.9795745084153	75.6486576762945	73.4751312187826	69.9833411319573	64.1215983767569	53.0867036158143	25.7438490416355	0
77.8943561107712	77.6708001420487	76.9477867054301	75.6147912013142	73.437811975219	69.9403233608172	64.0685699054864	53.0130771933889	25.6055567639171	0
77.864027464011	77.640124257735	76.9159932062758	75.5809177826023	73.4004835878723	69.8972923517366	64.0155193516952	52.9394028306148	25.4670597962169	0
77.8336940111258	77.6094433342639	76.8841940022912	75.5470374103373	73.36314604445	69.8542480867894	63.962446682024	52.865680431493	25.3283574140066	0
77.803355744081	77.578757363484	76.8523890848123	75.513150074692	73.3257993326483	69.8111905480255	63.909351863051	52.7919098997606	25.189448889878	0
77.7730126548411	77.5480663372424	76.8205784451723	75.4792557658332	73.2884434401519	69.7681197174705	63.856234861292	52.7180911388902	25.0503334935354	0
77.7426647353694	77.517370247385	76.7887620747017	75.4453544739225	73.251078354634	69.7250355771256	63.8030956432003	52.6442240520891	24.9110104917886	0
77.7123119776281	77.4866690857559	76.7569399647282	75.4114461891156	73.2137040637562	69.6819381089678	63.7499341751662	52.5703085422984	24.7714791485446	0
77.6819543735783	77.4559628441978	76.7251121065765	75.3775309015624	73.1763205551686	69.6388272949495	63.6967504235176	52.4963445121923	24.6317387248	0
77.6515919151802	77.4252515145519	76.6932784915686	75.343608601407	73.1389278165097	69.5957031169989	63.6435443545192	52.4223318641775	24.4917884786326	0
77.6212245943924	77.394535088658	76.6614391110236	75.3096792787878	73.1015258354064	69.5525655570195	63.5903159343729	52.3482705003919	24.3516276651927	0
77.590852403173	77.363813558354	76.6295939562576	75.2757429238373	73.0641145994738	69.5094145968905	63.5370651292174	52.2741603227045	24.2112555366942	0
77.5604753334783	77.3330869154766	76.5977430185838	75.2417995266821	73.0266940963154	69.4662502184665	63.4837919051282	52.2000012327141	24.0706713424055	0
77.5300933772639	77.3023551518605	76.5658862893125	75.2078490774429	72.9892643135228	69.4230724035774	63.4304962281175	52.1257931317485	23.9298743286393	0
77.4997065264839	77.2716182593391	76.5340237597508	75.1738915662345	72.9518252386761	69.3798811340286	63.377178064134	52.0515359208642	23.7888637387429	0
77.4693147730915	77.240876229744	76.5021554212028	75.1399269831656	72.9143768593434	69.3366763916008	63.3238373790631	51.9772295008452	23.6476388130876	0
77.4389181090383	77.2101290549052	76.4702812649698	75.1059553183391	72.876919163081	69.2934581580501	63.2704741387264	51.9028737722021	23.5061987890569	0
77.4085165262749	77.1793767266509	76.4384012823497	75.0719765618516	72.8394521374333	69.2502264151077	63.2170883088819	51.8284686351717	23.3645429010353	0
77.3781100167508	77.1486192368077	76.4065154646375	75.0379907037938	72.8019757699329	69.2069811444801	63.1636798552238	51.7540139897161	23.2226703803958	0
77.3476985724138	77.1178565772004	76.3746238031248	75.0039977342503	72.7644900481004	69.1637223278492	63.1102487433822	51.6795097355215	23.0805804554868	0
77.3172821852107	77.0870887396521	76.3427262891002	74.9699976432994	72.7269949594444	69.1204499468719	63.0567949389233	51.6049557719981	22.938272351618	0
77.2868608470869	77.056315715984	76.3108229138493	74.9359904210134	72.6894904914616	69.0771639831802	63.0033184073494	51.5303519982787	22.7957452910463	0
77.2564345499867	77.0255374980157	76.2789136686539	74.9019760574583	72.6519766316366	69.0338644183813	62.9498191140984	51.4556983132183	22.6529984929601	0
77.2260032858526	76.9947540775647	76.2469985447932	74.8679545426941	72.6144533674421	68.9905512340574	62.896297024544	51.3809946153928	22.5100311734629	0
77.1955670466261	76.963965446447	76.2150775335426	74.8339258667741	72.5769206863386	68.947224411766	62.8427521039953	51.306240803099	22.3668425455558	0
77.1651258242472	76.9331715964766	76.1831506261746	74.7998900197457	72.5393785757744	68.9038839330392	62.7891843176971	51.231436774353	22.2234318191193	0
77.1346796106546	76.9023725194653	76.151217813958	74.7658469916498	72.5018270231859	68.8605297793844	62.7355936308296	51.1565824268899	22.0797982008935	0
77.1042283977854	76.8715682072235	76.1192790881584	74.7317967725211	72.4642660159971	68.8171619322839	62.6819800085084	51.0816776581627	21.9359408944575	0
77.0737721775754	76.8407586515594	76.0873344400381	74.6977393523878	72.4266955416201	68.7737803731948	62.6283434157843	51.0067223653418	21.7918591002066	0
77.0433109419589	76.8099438442793	76.0553838608558	74.6636747212717	72.3891155874546	68.7303850835493	62.574683817643	50.9317164453139	21.6475520153292	0
77.0128446828688	76.7791237771874	76.0234273418669	74.6296028691883	72.3515261408879	68.6869760447544	62.5210011790057	50.8566597946815	21.5030188337814	0
76.9823733922364	76.748298442086	75.9914648743234	74.5955237861464	72.3139271892955	68.6435532381918	62.4672954647281	50.7815523097616	21.3582587462602	0
76.9518970619915	76.7174678307755	75.9594964494734	74.5614374621485	72.2763187200401	68.6001166452181	62.4135666396011	50.7063938865856	21.2132709401745	0
76.9214156840625	76.6866319350542	75.927522058562	74.5273438871906	72.2387007204725	68.5566662471649	62.3598146683503	50.6311844208979	21.0680545996152	0
76.890929250376	76.6557907467181	75.8955416928303	74.4932430512621	72.2010731779308	68.5132020253383	62.306039515636	50.5559238081553	20.9226089053217	0
76.8604377528574	76.6249442575613	75.8635553435163	74.4591349443457	72.1634360797411	68.4697239610193	62.252241146053	50.4806119435263	20.7769330346479	0
76.8299411834301	76.594092459376	75.8315630018539	74.4250195564178	72.1257894132168	68.4262320354634	62.1984195241307	50.4052487218901	20.6310261615244	0
76.7994395340163	76.5632353439518	75.7995646590737	74.390896877448	72.0881331656591	68.3827262299012	62.1445746143331	50.3298340378361	20.484887456419	0
76.7689327965361	76.5323729030766	75.7675603064025	74.3567668973992	72.0504673243567	68.3392065255376	62.0907063810584	50.2543677856625	20.3385160862943	0
76.7384209629084	76.5015051285359	75.7355499350635	74.3226296062276	72.0127918765858	68.2956729035522	62.0368147886389	50.1788498593763	20.1919112145623	0
76.7079040250503	76.4706320121129	75.7035335362762	74.288484993883	71.9751068096101	68.2521253450995	61.9828998013414	50.1032801526918	20.0450720010358	0
76.677381974877	76.4397535455888	75.6715111012564	74.2543330503082	71.9374121106811	68.2085638313083	61.9289613833667	50.0276585590301	19.8979976018769	0
76.6468548043023	76.4088697207425	75.639482621216	74.2201737654392	71.8997077670373	68.1649883432821	61.8749994988495	49.9519849715184	19.7506871695414	0
76.616322505238	76.3779805293505	75.6074480873632	74.1860071292056	71.861993765905	68.1213988620991	61.8210141118586	49.8762592829888	19.6031398527198	0
76.5857850695943	76.3470859631872	75.5754074909024	74.1518331315297	71.8242700944979	68.0777953688118	61.7670051863967	49.800481385978	19.4553547962738	0
76.5552424892796	76.3161860140245	75.5433608230343	74.1176517623274	71.7865367400171	68.0341778444474	61.7129726864	49.724651172726	19.307331141169	0
76.5246947562006	76.2852806736322	75.5113080749556	74.0834630115075	71.748793689651	67.9905462700076	61.6589165757387	49.6487685351757	19.1590680244024	0
76.494141862262	76.2543699337775	75.4792492378591	74.0492668689721	71.7110409305755	67.9469006264686	61.6048368182166	49.5728333649718	19.0105645789252	0
76.4635837993669	76.2234537862253	75.4471843029337	74.0150633246162	71.6732784499539	67.903240894781	61.5507333775709	49.4968455534602	18.8618199335601	0
76.4330205594163	76.1925322227383	75.4151132613646	73.9808523683282	71.6355062349367	67.85956705587	61.4966062174725	49.420804991687	18.7128332129129	0
76.4024521343096	76.1616052350765	75.3830361043327	73.9466339899891	71.5977242726618	67.8158790906351	61.4424553015254	49.3447115703978	18.5636035372781	0
76.3718785159439	76.1306728149975	75.3509528230152	73.9124081794735	71.5599325502545	67.7721769799503	61.3882805932673	49.268565180037	18.4141300225378	0
76.342106857926	76.1005518600977	75.3197111865876	73.879079860545	71.523130676736	67.7296167120695	61.3355146483245	49.1943790333232	18.2683891097372	0
76.3132192371107	76.0713254532888	75.2893974710205	73.846741234717	71.4874207082579	67.6883167228214	61.2843051986205	49.1223638230856	18.1268194124072	0
76.2851932093122	76.0429708866478	75.2599881343714	73.815367221589	71.4527750320027	67.6482452629788	61.2346133279695	49.0524662534452	17.9893252082957	0
76.2580068598954	76.0154659877168	75.2314601888283	73.7849333290988	71.419166679159	67.6093713164824	61.1864010025244	48.9846341875896	17.8558124472758	0
76.2315498087097	75.9886990492513	75.2036977237726	73.7553158689036	71.3864590887854	67.5715370976548	61.1394730140881	48.918594368483	17.7257489205846	0
76.2058925406598	75.9627414133835	75.1767747987282	73.7265939363964	71.3547397133844	67.5348439022936	61.0939552744523	48.8545249869109	17.599494687371	0
76.1810146034418	75.9375723864025	75.1506699564335	73.6987446650669	71.3239833644752	67.4992627431428	61.0498121962163	48.7923771288519	17.4769604568217	0
76.156896032091	75.9131717674392	75.1253622498397	73.6717457304971	71.2941654476829	67.4647653107779	61.0070090111715	48.7321029640152	17.3580585838174	0
76.1335173385222	75.8895198379025	75.1008312312184	73.6455753388789	71.2652619503246	67.4313239597892	60.9655117543643	48.6736557266595	17.2427030591789	0
76.110781461092	75.8665183672626	75.0769749674343	73.6201247045414	71.2371527413637	67.3987998416968	60.925148542374	48.6167944784812	17.130422464415	0
76.0887499885593	75.8442296931952	75.0538581702821	73.5954629389832	71.209914233669	67.3672814642091	60.886029391907	48.5616749112594	17.021530917769	0
76.0674047488711	75.8226354281033	75.0314617702651	73.5715697134004	71.1835240213777	67.3367430177419	60.8481225621672	48.5082532151779	16.9159470411215	0
76.0467280080751	75.8017176274964	75.0097671568012	73.5484251869614	71.1579602341505	67.3071593051839	60.8113970556849	48.4564865723953	16.8135910460181	0
76.0267024607329	75.7814587803052	74.9887561682267	73.5260099962482	71.1332015257186	67.278505729067	60.7758226032983	48.4063331386536	16.7143847194118	0
76.0072428458426	75.7617725973139	74.9683392580604	73.5042285653989	71.1091423347655	67.2506602463826	60.7412480476808	48.3575807712727	16.6179114164177	0
75.98840292848	75.7427134972555	74.9485729172182	73.4831412254668	71.0858493651153	67.2237001179535	60.7077694241784	48.3103653595891	16.5244448484646	0
75.9701665850673	75.7242651645045	74.9294402223835	73.4627299303099	71.0633027171348	67.1976024027957	60.6753584779909	48.2646477591686	16.4339112409931	0
75.9525180850586	75.706411681004	74.9109246621403	73.4429770720686	71.0414829727589	67.1723447118221	60.6439876264191	48.2203897298413	16.3462383334106	0
75.9354420821865	75.6891375174192	74.8930101278351	73.4238654714987	71.0203711849746	67.1479051959934	60.6136299448504	48.1775539182157	16.2613553615817	0
75.9188637583931	75.6723669523468	74.8756180361684	73.4053112470026	70.9998746954101	67.1241767046399	60.5841526626487	48.1359537900176	16.1788948533578	0
75.902830004849	75.6561474469226	74.8587976551681	73.3873670151032	70.9800516775297	67.1012266170572	60.5556395294564	48.0957078284003	16.0990950482659	0
75.8873265345679	75.6404645433817	74.8425339865807	73.3700167784863	70.9608844837676	67.0790345749234	60.5280654390434	48.0567811360838	16.0218893811345	0
75.8723394124929	75.6253041399863	74.8268124011297	73.353244932684	70.942355898654	67.0575807159657	60.5014058910074	48.0191396369126	15.9472127113605	0
75.8578012216283	75.6105980050974	74.8115620861711	73.3369758863213	70.9243824135016	67.0367684549279	60.4755411698761	47.9826150145	15.8747327925865	0
75.8437540233804	75.596388711288	74.7968272347803	73.3212568355593	70.907016208274	67.0166582282495	60.4505463923524	47.9473135194597	15.8046629708455	0
75.8301848523869	75.5826631378373	74.7825942344864	73.3060732587268	70.8902412588879	66.9972315421225	60.4263987308345	47.9132033477878	15.7369420915675	0
75.8170810652253	75.5694084897357	74.7688498104525	73.2914109937814	70.8740419371065	66.9784703576978	60.4030759144711	47.8802534540771	15.6715103475342	0
75.8044303330394	75.5566122902299	74.7555810177645	73.2772562301318	70.858403001605	66.9603570809367	60.3805562170046	47.8484335358701	15.6083092582935	0
75.7921736035537	75.5442147728686	74.7427258271539	73.2635427485094	70.8432512901521	66.9428070790863	60.3587347033246	47.8175959401862	15.5470467793052	0
75.7803474984352	75.5322530042728	74.7303227158473	73.2503116402745	70.8286322325429	66.9258729692225	60.337676766787	47.7878331406464	15.4879082700211	0
75.7689405551631	75.520715384213	74.7183596476698	73.2375500630411	70.8145316536648	66.9095383836215	60.3173621836881	47.7591168884786	15.4308389511438	0
75.7579415985931	75.5095906032249	74.7068248879296	73.2252454956976	70.8009357323151	66.8937873618185	60.2977712298012	47.73141961947	15.3757852893675	0
75.7473397342824	75.4988676358601	74.6957069964333	73.2133857309917	70.7878309930827	66.8786043413536	60.2788846692321	47.7047144394114	15.3226949762904	0
75.7370832883418	75.4884941828534	74.6849516923681	73.201912818682	70.7751534046786	66.8639152419433	60.2606106252434	47.6788719830238	15.27131174375	0
75.7272041157853	75.4785024861681	74.6745924444209	73.190862500864	70.7629424822832	66.8497658292067	60.2430059711566	47.6539726532048	15.2217964805411	0
75.7176920949007	75.4688823022301	74.664618623196	73.1802234345202	70.7511857028907	66.8361416373093	60.2260528174638	47.6299914060316	15.1741002864918	0
75.7085373600924	75.4596236466202	74.6550198680627	73.1699845631595	70.7398708593384	66.8230285642391	60.2097337217171	47.6069038134296	15.1281754048259	0
75.6997302958541	75.4507167879778	74.6457860808447	73.160135110111	70.7289860529516	66.8104128634002	60.194031678359	47.5846860497191	15.0839752012078	0
75.6912257294704	75.442116006591	74.6368698085703	73.1506244126135	70.7184753011985	66.7982297593829	60.1788663322049	47.563224909273	15.0412751618602	0
75.6830513430893	75.4338493207937	74.6283001353718	73.1414835300328	70.7083729417588	66.7865190202368	60.1642870984049	47.5425902305467	15.0002148034932	0
75.6751982093829	75.4259076955918	74.6200676853448	73.1327024558664	70.6986679252135	66.775267878113	60.1502781751911	47.5227598500051	14.9607506080741	0
75.6676576289378	75.4182823266226	74.6121633218147	73.124271438741	70.6893494835335	66.7644638895717	60.1368241600901	47.5037121565859	14.9228400999077	0
75.6603890198222	75.4109321403793	74.6045444135925	73.1161449627672	70.6803673196034	66.7540488535053	60.1238528421702	47.4853453804335	14.8862813088214	0
75.6534171415164	75.4038821969863	74.5972369739248	73.1083508076566	70.6717521450031	66.7440583375325	60.1114084133024	47.4677219626022	14.8511988137452	0
75.6467339215561	75.3971243265181	74.5902325242702	73.1008799239979	70.6634939660634	66.7344807911897	60.0994765706752	47.4508218154228	14.8175530284709	0
75.6403314949943	75.3906505690497	74.5835228039461	73.0937234947751	70.6555830455265	66.7253049597918	60.0880433759576	47.4346253570797	14.7853053312752	0
75.6342021994123	75.3844531696099	74.5770997648996	73.0868729298037	70.6480098964285	66.7165198774134	60.0770952467512	47.4191135000929	14.7544180452781	0
75.6283106210871	75.3784962853693	74.5709262045332	73.0802885082812	70.6407306239763	66.7080747478292	60.0665691491844	47.4041973739668	14.7247146966185	0
75.6226782386316	75.3728016557023	74.5650246889071	73.073994328467	70.6337718695011	66.7000004237901	60.0565034124974	47.3899311190723	14.6963031346984	0
75.6172979465396	75.3673620892313	74.5593877547053	73.0679824240332	70.6271248345315	66.6922867338421	60.046885434001	47.3762970100288	14.6691482975308	0
75.6121628235074	75.3621705809936	74.5540081320317	73.0622450350326	70.6207809483937	66.6849237694606	60.0377029354272	47.3632777732162	14.6432159939401	0
75.6072661279562	75.357220307913	74.5488787397159	73.0567746029007	70.6147318627094	66.6779018787277	60.0289439552052	47.3508565762838	14.6184728850259	0
75.6025769863697	75.3524800223081	74.5439671443834	73.0515364984405	70.6089393084965	66.6711767734517	60.0205535281964	47.3389559010248	14.594764986685	0
75.598114012895	75.347968564285	74.539292902486	73.0465516058557	70.6034263736736	66.6647751902635	60.0125648658952	47.3276226438421	14.5721855779498	0
75.5938709599892	75.343679610753	74.5348494516684	73.0418129202402	70.5981853210942	66.6586881829425	60.0049668780078	47.3168411874604	14.5507036752864	0
75.5898417434014	75.339607003882	74.5306304010682	73.0373136197132	70.5932086156933	66.6529070386306	59.9977487625024	47.3065963171602	14.5302890779642	0
75.5860204381616	75.3357447470454	74.5266295271091	73.0330470609373	70.5884889195495	66.6474232721517	59.990899998651	47.2968732112597	14.510912350768	0
75.5823801551338	75.3320656252065	74.5228185819812	73.0289830835005	70.5839929018059	66.64219830872	59.9843727071913	47.2876043289639	14.4924393099287	0
75.5789370099822	75.3285859496492	74.5192144971186	73.0251397683362	70.5797405511884	66.6372552950629	59.9781956365433	47.2788302512967	14.4749505564606	0
75.5756855154303	75.3253001667299	74.5158115086665	73.0215109628019	70.5757250716438	66.6325863718951	59.9723590395218	47.2705372381876	14.4584187681594	0
75.5726203287734	75.3222028691258	74.5126040046259	73.0180906763519	70.5719398461377	66.6281838867459	59.9668534246562	47.2627119075384	14.4428173238352	0
75.5697362482921	75.3192887922062	74.5095865210905	73.0148730765265	70.5683784322316	66.6240403888655	59.961669549938	47.2553412266194	14.4281202873409	0
75.5670098778634	75.3165342562968	74.5067344797893	73.0118319209618	70.5650118289439	66.6201223137616	59.9567657516693	47.2483664123694	14.4142108770011	0
75.5644551560243	75.3139533691334	74.504062524827	73.0089828479976	70.5618573246055	66.6164496802724	59.9521668899877	47.2418225455387	14.401158672582	0
75.5620672683502	75.3115412580756	74.5015655991414	73.0063204594995	70.5589089564997	66.6130155919577	59.9478644085678	47.2356975543006	14.3889396268217	0
75.5598415282573	75.3092931798749	74.49923877997	73.0038395007117	70.5561609202855	66.6098133354055	59.9438499775757	47.2299796845459	14.3775303181349	0
75.5577569957084	75.3071879407413	74.4970600693332	73.0015164844089	70.5535872598731	66.6068128698202	59.9400863055499	47.224616316696	14.3668262224867	0
75.5558260906176	75.3052381113691	74.4950425158799	72.9993653452084	70.5512033800763	66.6040320323873	59.9365955408592	47.2196386965544	14.3568892472149	0
75.5540444774925	75.3034393038674	74.4931815656974	72.9973812221599	70.549003911577	66.6014646124776	59.933369975996	47.2150359434769	14.3476976946085	0
75.5524079366749	75.3017872475883	74.4914727865703	72.9955593842493	70.5469836286016	66.5991045653871	59.930402108897	47.2107974654231	14.3392304373489	0
75.5509123614185	75.3002777861694	74.4899118649132	72.9938952271265	70.5451374453091	66.5969460081704	59.9276846378129	47.206912951836	14.3314669049144	0
75.5495395638683	75.2988925114135	74.4884796941828	72.9923683510225	70.5434428179008	66.5949628491861	59.9251851722708	47.2033366948287	14.3243163262805	0
75.5483002664946	75.2976422759956	74.4871875397455	72.9909907862931	70.5419130459999	66.5931704872869	59.9229228301849	47.2000956559712	14.3178320508968	0
75.5471906725513	75.2965232373304	74.4860314137312	72.9897582763766	70.540543428002	66.5915634837252	59.9208908599888	47.1971802981837	14.3119950410495	0
75.5462070875051	75.2955316562912	74.4850074356668	72.9886666793896	70.5393293890046	66.5901365462439	59.9190826916108	47.194581339733	14.3067867655453	0
75.5453459164336	75.2946638945774	74.4841118297453	72.987711965212	70.5382664775885	66.5888845253616	59.9174919318923	47.1922897478493	14.3021891873852	0
75.5445913774308	75.2939039791647	74.4833280171684	72.9868764332474	70.5373351331986	66.5877847822485	59.9160904760296	47.1902658607447	14.2981235707883	0
75.5439527179538	75.2932612698479	74.4826657137377	72.9861704591922	70.5365468262281	66.5868505971258	59.9148948091547	47.1885329192129	14.2946358449051	0
75.5434266164838	75.2927324050686	74.4821214309353	72.9855903197073	70.5358974442174	66.5860772124468	59.913899023838	47.1870825742954	14.2917093322009	0
75.5430098415933	75.2923141144599	74.4816917749117	72.9851323925466	70.5353829864066	66.5854599998339	59.9130973727692	47.1859067025932	14.2893278038576	0
75.5426992496321	75.2920032165053	74.4813734440563	72.9847931539635	70.5349995608715	66.5849944567715	59.9124842646733	47.1849974005604	14.2874754686523	0
75.5424811598545	75.291785864875	74.4811520671393	72.9845572606789	70.5347302125119	66.5846609601155	59.9120353382924	47.1843202891599	14.2860841082467	0
75.5423635392851	75.2916701234322	74.4810360148457	72.9844336520647	70.5345848238756	66.5844709510976	59.9117647937845	47.1838953810531	14.2851932239382	0
75.5423434851304	75.2916530544639	74.4810222386728	72.9844190746673	70.5345598016972	66.5844202725928	59.9116674681296	47.1837153762927	14.2847882274792	0
75.5424181739144	75.2917318005456	74.4811077734708	72.9845103640466	70.5346516510676	66.5845048812324	59.9117383393846	47.1837731738771	14.2848549272642	0
75.5425753974733	75.2918940058318	74.481279795188	72.9846938290662	70.5348452429502	66.5847072675046	59.911955670282	47.1840380983638	14.2853324787572	0
75.5428222326895	75.2921468332753	74.4815457394195	72.9849774106121	70.5351493560792	66.5850375942774	59.9123320727713	47.1845279193052	14.2862559226029	0
75.5431560736772	75.2924876457078	74.4819028696839	72.9853581884433	70.5355607653769	66.5854921302664	59.9128629119955	47.1852360817087	14.2876121570487	0
75.5435743861737	75.2929138784616	74.4823485247703	72.9858333227015	70.5360763345864	66.5860672469244	59.913543680548	47.1861562104415	14.2893884394135	0
75.5440747056731	75.2934230374811	74.4828801167767	72.9864000518165	70.5366930139577	66.5867594157667	59.9143699951641	47.1872821055866	14.2915723769348	0
75.5446464682125	75.2940044311153	74.4834865491548	72.9870465293535	70.5373977133413	66.5875534872856	59.915323048598	47.1885872277883	14.2941113583981	0
75.5452957592087	75.2946642188643	74.4841742159883	72.9877795840859	70.5381979820554	66.5884582005834	59.9164136841867	47.1900868495199	14.2970354652679	0
75.5460203054645	75.2954001003285	74.4849407304333	72.9885966691581	70.5390910076013	66.5894703016059	59.9176378591721	47.1917752515646	14.3003332657178	0
75.5468178967176	75.2962098388154	74.4857837717875	72.9894953083488	70.5400740555289	66.5905866265843	59.9189916428362	47.1936468729372	14.3039936442264	0
75.5476863839871	75.2970912596661	74.4867010837533	72.990473094215	70.5411444673858	66.5918040996636	59.9204712135662	47.195696306756	14.3080057934022	0
75.5486166351966	75.2980351205318	74.4876830742211	72.9915197868179	70.5422909286112	66.593109626583	59.9220603158872	47.1979006161598	14.3123242712639	0
75.5496138775672	75.2990467123474	74.4887352357773	72.9926412523281	70.5435199243914	66.5945107141453	59.9237682625837	47.2002729133985	14.3169748750178	0
75.5506761301387	75.3001240305385	74.4898554887117	72.9938352718818	70.5448290046421	66.5960045275349	59.9255915312084	47.2028082142152	14.3219476430252	0
75.5518014671922	75.3012651264504	74.4910418113714	72.9950996886146	70.5462157877844	66.597588311187	59.9275266976889	47.2055016733701	14.3272328917971	0
75.5529880167871	75.3024681058671	74.4922922386233	72.9964324060191	70.5476779589293	66.5992593866886	59.9295704337268	47.2083485809772	14.3328212087144	0
75.5542278925802	75.3037249873273	74.4935984872119	72.9978245817843	70.5492057482243	66.6010064477721	59.9317087038554	47.2113291344609	14.3386733869241	0
75.5555255797356	75.305040310747	74.4949652702363	72.9992812497592	70.5508047207493	66.6028359357752	59.9339494977117	47.2144545792236	14.3448115261465	0
75.5568793537224	75.3064123311322	74.4963907774905	73.0008004788787	70.552472744411	66.6047453837531	59.9362897495272	47.2177205764548	14.3512269568985	0
75.5582875384463	75.3078393525204	74.4978732496744	73.0023803924379	70.5542077471779	66.6067323942472	59.9387264798073	47.2211229093209	14.3579112538992	0
75.5597431177698	75.3093142742424	74.4994053178288	73.0040131244214	70.5560010382115	66.6087869099299	59.9412472038132	47.2246439646673	14.3648295642521	0
75.5612500627956	75.3108411159472	74.5009911550672	73.0057031320903	70.5578575451889	66.6109146340648	59.943858994718	47.2282936952291	14.3720014303315	0
75.5628068301666	75.3124183160418	74.502629141595	73.0074486877078	70.5597753606643	66.613113359601	59.9465591094513	47.232068218474	14.3794190965833	0
75.564411920122	75.3140443570655	74.504317703436	73.0092481124623	70.5617526312467	66.6153809420252	59.9493448826011	47.2359637617022	14.3870750274019	0
75.5660638753265	75.3157177645043	74.5060553112017	73.011099775153	70.5637875561457	66.6177152976804	59.9522137243284	47.2399766591025	14.3949619012549	0
75.5677566477787	75.3174324176015	74.5078356131122	73.0129968958984	70.5658726448997	66.6201077586276	59.9551548749947	47.244091733063	14.4030497060349	0
75.5694936380909	75.3191917586311	74.5096621830243	73.0149432920805	70.5680121178189	66.6225632090842	59.9581743909116	47.2483175025087	14.4113551507942	0
75.5712735051608	75.3209944307412	74.5115336137065	73.0169374629327	70.570204318212	66.6250797321035	59.9612698892789	47.2526505944845	14.419871500854	0
75.5730949460398	75.3228391157024	74.5134485380243	73.0189779505018	70.5724476366861	66.6276554654608	59.9644390552601	47.2570877321878	14.4285922141221	0
75.5749566949	75.3247245328622	74.5154056278547	73.0210633384878	70.574740509864	66.6302886001697	59.967679640143	47.2616257323686	14.4375109358945	0
75.5768535436293	75.3266454115685	74.5173994138426	73.0231877892299	70.5770764885746	66.6329716735125	59.9709823806973	47.2662515299768	14.446601850466	0
75.5787884010334	75.3286046963542	74.5194329532401	73.02535456848	70.5794591833169	66.635708863653	59.9743524567899	47.2709724085436	14.4558792286528	0
75.5807601029582	75.3306012094902	74.5215050247759	73.0275623740211	70.5818871567377	66.6384985074053	59.977787800806	47.2757854410542	14.4653372292508	0
75.5827675186053	75.3326338070125	74.5236144422311	73.0298099410601	70.5843590128247	66.6413389894132	59.981286404543	47.2806877845687	14.4749701794488	0
75.5848095496213	75.3347013778006	74.5257600534835	73.0320960412062	70.5868733957772	66.6442287408434	59.9848463175891	47.2856766779289	14.4847725702377	0
75.5868817157811	75.3367993879394	74.527937153914	73.0344156533307	70.5894247587761	66.6471613433544	59.9884595733824	47.2907408865207	14.4947222195878	0
75.5889865023801	75.3389303533418	74.5301483559087	73.0367715681517	70.5920161871812	66.6501403671239	59.9921305971936	47.2958866306001	14.5048313022997	0
75.5911228999102	75.3410932528235	74.5323926007092	73.039162656951	70.5946464352872	66.6531643706902	59.9958575968388	47.3011113729344	14.5150947580639	0
75.5932899279934	75.343287094687	74.5346688601672	73.0415878236888	70.5973142934831	66.6562319543516	59.9996388320117	47.306412649717	14.5255076736116	0
75.5954866345806	75.3455109159116	74.5369761359027	73.0440460041034	70.6000185872584	66.6593417590159	60.003472612857	47.3117880685485	14.5360652786671	0
75.5977091696179	75.3477608204123	74.5393103853557	73.0465328839422	70.6027545509316	66.6624882703923	60.0073520952155	47.3172279790914	14.5467485340817	0
75.5999596541084	75.3500389554138	74.5416738382461	73.0490508452994	70.6055248181356	66.6656745356934	60.0112810553873	47.3227376874755	14.5575678147686	0
75.6022372135568	75.3523444363995	74.5440655776858	73.0515989109023	70.608328310435	66.6688993069769	60.0152579416074	47.3283149967595	14.5685187420115	0
75.6045409988806	75.354676404577	74.5464847134886	73.0541761319807	70.6111639808739	66.6721613727204	60.0192812473597	47.333957774054	14.5795970653224	0
75.6068675983776	75.3570314075381	74.5489276636161	73.0567786859614	70.6140276070807	66.6754558474126	60.0233449091052	47.3396574707695	14.5907859299383	0
75.6092188818621	75.3594113382865	74.5513963939259	73.0594086731702	70.616921511194	66.6787854176628	60.0274522557162	47.3454187629898	14.6020944715007	0
75.6115940698052	75.3618154084346	74.5538900873114	73.0620652228388	70.6198447323994	66.6821489716053	60.0316019044967	47.3512396931029	14.6135187905455	0
75.6139924054597	75.3642428526545	74.5564079506015	73.0647474897454	70.622796338095	66.6855454300137	60.0357925133052	47.3571183609083	14.6250551025047	0
75.6164131542254	75.366692928036	74.5589492138931	73.0674546535024	70.6257754231033	66.6889737453898	60.0400227794227	47.3630529220143	14.6366997344925	0
75.6188533898303	75.3691626734941	74.5615108051133	73.0701834359844	70.6287783666464	66.6924297284258	60.0442875035932	47.3690360474961	14.6484382481349	0
75.6213147046695	75.3716537012632	74.5640943986975	73.0729356263117	70.6318071468248	66.6959156674774	60.04858952062	47.3750717179373	14.660278412461	0
75.6237964247421	75.3741653297718	74.5666992884062	73.0757104720392	70.6348609334848	66.6994306018386	60.0529276356295	47.3811582416211	14.6722168602099	0
75.6262978958841	75.376696897527	74.5693247888391	73.0785072429607	70.6379389210293	66.7029735992129	60.0573006890491	47.3872939768075	14.6842503240911	0
75.6288184832118	75.3792477625513	74.5719702348498	73.0813252304838	70.641040327727	66.7065437549139	60.0617075556148	47.3934773303273	14.6963756339641	0
75.6313556794935	75.3818153878826	74.5746329945683	73.0841616264294	70.6441620520449	66.7101374805115	60.066143781974	47.3997020257092	14.7085804349739	0
75.6339108392522	75.3844011450079	74.5773144925424	73.0870179530578	70.6473057770659	66.7137567228722	60.0706117793515	47.4059714474734	14.7208713262397	0
75.6364833803463	75.387004445333	74.5800141190268	73.0898935608924	70.6504707863273	66.7174006528147	60.0751105163103	47.4122841352855	14.7332454033896	0
75.639072737889	75.389624717728	74.5827312823999	73.0927878197954	70.6536563847179	66.7210684658584	60.0796389921072	47.4186386722666	14.7456998489293	0
75.6416783637607	75.3922614080335	74.5854654086514	73.0957001184195	70.6568618978719	66.7247593815225	60.0841962358232	47.4250336837611	14.75823192977	0
75.6442981120771	75.3949123450135	74.5882142454913	73.0986280537921	70.6600846719461	66.7284703294254	60.088778437151	47.4314638004759	14.7708310855672	0
75.6469331336357	75.397578693964	74.5909790034415	73.1015729196017	70.6633261373299	66.7322029639528	60.093387644588	47.4379318966766	14.7835029150586	0
75.6495829261717	75.4002599471358	74.5937591566504	73.1045341558805	70.6665856763773	66.7359565702375	60.0980229687551	47.4444367131483	14.7962449159853	0
75.6522470024132	75.4029556119538	74.5965541950114	73.1075112194586	70.6698626899861	66.7397304548642	60.1026835469318	47.4509770284184	14.8090546614969	0
75.6549234669671	75.4056637707049	74.5993621293529	73.1105019882314	70.6731548346113	66.743521906501	60.107366014472	47.4575481018277	14.8219228339495	0
75.6576133307035	75.4083854470621	74.6021840231867	73.1135075988785	70.6764633670601	66.7473323786296	60.1120721707544	47.4641524573118	14.8348543459123	0
75.6603161473437	75.4111201899379	74.6050194094528	73.1165275541488	70.6797877389157	66.7511612364668	60.1168012259253	47.4707889765603	14.8478469767025	0
75.6630314840063	75.4138675618035	74.6078678351585	73.1195613717967	70.6831274183249	66.7550078643902	60.1215524139434	47.4774565749755	14.8608985729574	0
75.6657589208235	75.4166271383	74.6107288609752	73.1226085841515	70.6864818895218	66.7588716653868	60.1263249918955	47.4841542007022	14.8740070466902	0
75.6684968387515	75.4193972814042	74.613600787996	73.1256673789388	70.6898491512392	66.7627503241602	60.1311160866731	47.4908778063065	14.8871644495379	0
75.6712460947399	75.422178859	74.616484518012	73.1287387201109	70.6932302693223	66.7666450731871	60.135927223655	47.4976295305297	14.9003749403518	0
75.6740063044925	75.4249714827269	74.6193796490401	73.1318221798269	70.6966247719636	66.7705553663036	60.1407577231255	47.5044084109867	14.913636609827	0
75.6767770953322	75.4277747759824	74.6222857912942	73.1349173432543	70.700032201712	66.7744806739531	60.1456069260086	47.5112135145127	14.9269476069668	0
75.6795581058652	75.4305883735823	74.6252025668332	73.1380238081925	70.7034521150574	66.7784204827049	60.1504741932709	47.5180439363155	14.9403061373857	0
75.6823479546355	75.4334108779577	74.6281285262849	73.1411400287051	70.7068828049451	66.7823728176663	60.1553570742681	47.5248962246625	14.953705428397	0
75.6851473672043	75.4362430240061	74.6310644333835	73.1442668212821	70.710325174187	66.7863387226443	60.1602568605103	47.5317721896353	14.9671489964516	0
75.6879560130125	75.4390844777448	74.6340099425514	73.1474038182327	70.7137788173542	66.7903177282575	60.1651729677132	47.5386710039489	14.9806352018412	0
75.6907735715659	75.4419349153761	74.6369647187751	73.15055066313	70.717243341447	66.7943093795022	60.170104829463	47.5455918656159	14.9941624553012	0
75.6935997321435	75.4447940229911	74.6399284372976	73.1537070104826	70.7207183655329	66.7983132353329	60.1750518966945	47.5525339972076	15.0077292165306	0
75.6964333173284	75.4476606095179	74.6428998630307	73.1568715430527	70.7242024351746	66.8023276131205	60.1800120814589	47.5594944583198	15.0213297211562	0
75.6992749406655	75.4505352964703	74.6458796419945	73.1600449515882	70.7276963141605	66.8063533957984	60.1849864758897	47.5664747789484	15.0349669387599	0
75.7021243181323	75.4534177969538	74.6488674774471	73.1632269204641	70.7311996545104	66.8103901804366	60.1899745782987	47.5734742487318	15.0486394627814	0
75.7049811744168	75.4563078328867	74.6518630817858	73.1664171437984	70.7347121189929	66.8144375765386	60.1949759024521	47.580492179185	15.0623459302491	0
75.7073681772975	75.4587225339108	74.6543659544314	73.1690826094775	70.7376468531222	66.8178193428052	60.1991548186903	47.5863560760884	15.0737981781058	0
75.7097546278282	75.4611366490215	74.6568681785894	73.1717473542365	70.7405807990252	66.8212002500083	60.2033327320158	47.592218468977	15.085245761989	0
75.712140874336	75.4635505360111	74.6593701344571	73.174411792498	70.7435144197133	66.8245808379278	60.2075103337803	47.5980804601746	15.0964007238894	0
75.7145269160607	75.465964194427	74.6618718221394	73.1770759250346	70.7464477164907	66.8279611079793	60.2116876248782	47.6039339070232	15.1071467591907	0
75.7169127522538	75.468377623827	74.6643732417469	73.1797397526178	70.7493806906504	66.8313410615583	60.215864380904	47.6097681349241	15.1174270219492	0
75.7192983821784	75.470790823779	74.6668743933968	73.1824032760175	70.7523133434741	66.8347206943356	60.2200400968452	47.6155718119639	15.1272217309556	0
75.7216838051091	75.473203793861	74.6693752772118	73.1850664960022	70.7552456760983	66.8380999894583	60.2242139870742	47.6213340296213	15.1365336268817	0
75.7240690203323	75.4756165336608	74.6718758933207	73.1877294133358	70.7581776892248	66.8414789111125	60.228385015018	47.6270448816028	15.145378592538	0
75.7264540271455	75.4780290427763	74.6743762418581	73.1903920287679	70.7611093826943	66.8448573991761	60.2325519366904	47.6326957308031	15.1537796605451	0
75.7288388248578	75.4804413208151	74.6768763229635	73.1930543430151	70.764040754953	66.8482353652504	60.2367133485856	47.6382792872579	15.1617632363234	0
75.7312234127895	75.4828533673944	74.6793761367813	73.1957163567311	70.7669718024499	66.851612690104	60.2408677344635	47.6437895759063	15.1693567636256	0
75.7336077902721	75.485265182141	74.6818756834586	73.1983780704637	70.7699025190019	66.8549892224235	60.2450135080974	47.6492218441619	15.1765873239229	0
75.7359919566486	75.4876767646912	74.6843749631433	73.2010394845999	70.7728328951578	66.8583647786977	60.2491490506245	47.6545724405225	15.1834808355047	0
75.7383759112728	75.4900881146906	74.6868739759805	73.2037005992989	70.7757629175889	66.8617391440369	60.2532727420898	47.6598386832831	15.1900616334317	0
75.7407596535097	75.4924992317934	74.6893727221073	73.2063614144132	70.7786925685247	66.8651120737322	60.2573829873187	47.6650187305978	15.1963522875355	0
75.743143182735	75.4949101156626	74.6918712016466	73.209021929401	70.7816218252514	66.8684832953708	60.2614782365528	47.6701114581556	15.2023735657539	0
75.7455264983357	75.4973207659693	74.6943694146987	73.211682143231	70.7845506596813	66.8718525113479	60.2655570014186	47.6751163476134	15.2081444830346	0
75.7479095997092	75.4997311823916	74.6968673613311	73.2143420542802	70.7874790379996	66.8752194016369	60.2696178668472	47.6800333870057	15.2136823976387	0
75.7502924862637	75.5021413646142	74.6993650415667	73.2170016602287	70.7904069203908	66.8785836267028	60.2736594995488	47.6848629832067	15.2190031307961	0
75.7526751574177	75.5045513123266	74.7018624553695	73.2196609579528	70.7933342608444	66.8819448304673	60.2776806536052	47.6896058858688	15.2241210948506	0
75.7550576126001	75.5069610252221	74.704359602629	73.2223199434172	70.7962610070379	66.8853026432508	60.2816801736904	47.6942631219255	15.2290494209709	0
75.7574398512497	75.5093705029959	74.7068564831424	73.224978611569	70.7991871002912	66.8886566846351	60.2856569963632	47.698835939601	15.2338000813185	0
75.7598218728151	75.5117797453426	74.7093530965951	73.2276369562353	70.8021124755894	66.8920065662034	60.289610149821	47.7033257608397	15.2383840029731	0
75.7622036767542	75.5141887519535	74.7118494425398	73.2302949700251	70.8050370616668	66.8953518941276	60.2935387524431	47.7077341411092	15.2428111724254	0
75.7645852625335	75.5165975225142	74.7143455203736	73.2329526442365	70.8079607811451	66.8986922715818	60.2974420104024	47.7120627356041	15.2470907303653	0
75.7669666296283	75.5190060567006	74.7168413293147	73.2356099687709	70.8108835507211	66.9020273009694	60.3013192145768	47.7163132709713	15.2512310570279	0
75.7693477775211	75.5214143541747	74.7193368683775	73.2382669320547	70.8138052813957	66.9053565859565	60.3051697369553	47.7204875217692	15.2552398486593	0
75.7717287057015	75.5238224145811	74.7218321363468	73.2409235209691	70.8167258787387	66.9086797333116	60.3089930266932	47.7245872909739	15.2591241858062	0
75.7741094136649	75.5262302375412	74.7243271317514	73.2435797207879	70.8196452431827	66.9119963545526	60.3127886059477	47.7286143939269	15.2628905941846	0
75.7764899009117	75.5286378226483	74.7268218528375	73.246235515125	70.8225632703415	66.9153060674084	60.3165560655958	47.732570645205	15.2665450988813	0
75.7788701669459	75.5310451694616	74.7293162975419	73.2488908858898	70.825479851346	66.9186084971004	60.3202950609177	47.7364578479602	15.2700932725991	0
75.7812502112738	75.5334522775002	74.7318104634642	73.2515458132525	70.8283948731946	66.9219032774557	60.3240053073096	47.7402777853453	15.2735402786118	0
75.7836300334024	75.5358591462358	74.734304347841	73.254200275618	70.8313082191116	66.92519005186	60.3276865760768	47.7440322136929	15.2768909090282	0
75.7860096328376	75.5382657750862	74.7367979475186	73.2568542496083	70.8342197689123	66.9284684740627	60.331338690345	47.7477228571674	15.2801496189096	0
75.7883890090825	75.5406721634072	74.7392912589274	73.2595077100539	70.8371293993676	66.9317382088439	60.3349615211176	47.7513514036477	15.2833205567208	0
75.7907681616347	75.543078310485	74.7417842780568	73.262160629993	70.840036984569	66.9349989325556	60.3385549834996	47.7549195016379	15.2864075915458	0
75.7931470899846	75.5454842155278	74.7442770004304	73.2648129806785	70.8429423962881	66.9382503335475	60.3421190331004	47.7584287580323	15.2894143374428	0
75.7955257936124	75.5478898776571	74.7467694210832	73.2674647315929	70.8458455043299	66.941492112488	60.3456536626256	47.7618807365872	15.2923441752742	0
75.7979042719851	75.550295295899	74.7492615345386	73.2701158504694	70.8487461768771	66.9447239825905	60.3491588986585	47.7652769569764	15.2952002723016	0
75.8002825245542	75.5527004691751	74.7517533347882	73.2727663033203	70.8516442808247	66.9479456697555	60.3526347986354	47.7686188943248	15.297985599805	0
75.8026605507518	75.5551053962928	74.7542448152715	73.2754160544707	70.8545396821022	66.9511569126365	60.3560814480099	47.7719079791316	15.3007029489489	0
75.8050383499871	75.5575100759362	74.7567359688578	73.2780650665983	70.8574322459834	66.9543574626393	60.3594989576028	47.7751455975101	15.3033549450955	0
75.8074159216433	75.5599145066563	74.7592267878296	73.2807133007774	70.8603218373828	66.9575470838616	60.3628874611327	47.7783330916795	15.3059440607376	0
75.8097932650732	75.5623186868613	74.7617172638669	73.2833607165288	70.8632083211365	66.960725552982	60.3662471129196	47.781471760658	15.3084726272038	0
75.812170379595	75.5647226148067	74.7642073880337	73.2860072718719	70.8660915622701	66.9638926591028	60.3695780857546	47.7845628611126	15.31094284527	0
75.8145472644885	75.5671262885856	74.7666971507661	73.2886529233818	70.86897142625	66.9670482035551	60.3728805689273	47.7876076083296	15.3133567947963	0
75.81692391899	75.5695297061189	74.7691865418613	73.2912976262492	70.8718477792203	66.9701919996707	60.3761547664029	47.7906071772747	15.3157164434911	0
75.819300342288	75.5719328651457	74.771675550469	73.2939413343421	70.8747204882244	66.9733238725258	60.3794008951407	47.793562703718	15.3180236548969	0
75.8216765335181	75.5743357632132	74.774164165084	73.296584000271	70.8775894214113	66.9764436586622	60.3826191835451	47.7964752854033	15.3202801956757	0
75.8240524917578	75.5767383976678	74.7766523735409	73.2992255754547	70.8804544482276	66.9795512057894	60.3858098700412	47.7993459832434	15.3224877422682	0
75.8264282160217	75.5791407656454	74.7791401630094	73.3018660101886	70.883315439594	66.9826463724711	60.3889732017675	47.8021758225294	15.3246478869883	0
75.8288037052555	75.5815428640621	74.7816275199921	73.304505253713	70.8861722680687	66.9857290278008	60.3921094333769	47.8049657941407	15.32676214361	0
75.8311789583312	75.5839446896056	74.7841144303236	73.3071432542831	70.889024807996	66.988799051068	60.3952188259387	47.8077168557475	15.3288319524957	0
75.8335539740408	75.5863462387263	74.7866008791706	73.3097799592388	70.8918729356422	66.9918563314188	60.398301645936	47.8104299329982	15.3308586853117	0
75.835928751091	75.588747507629	74.7890868510342	73.3124153150747	70.8947165293182	66.9949007675128	60.401358164349	47.8131059206868	15.3328436493679	0
75.8383032880971	75.5911484922645	74.791572329753	73.31504926751	70.8975554694904	66.9979322671782	60.4043886558204	47.8157456838936	15.3347880916199	0
75.8406775835774	75.5935491883221	74.7940572985074	73.3176817615584	70.900389638879	67.0009507470671	60.407393397895	47.8183500590991	15.3366932023618	0
75.8430516359465	75.5959495912218	74.7965417398262	73.3203127415967	70.9032189225455	67.003956132313	60.4103726703292	47.8209198552647	15.33856011864	0
75.8454254435103	75.5983496961075	74.7990256355929	73.3229421514326	70.9060432079696	67.0069483561914	60.413326754464	47.8234558548825	15.3403899274126	0
75.8477990044588	75.6007494978401	74.8015089670548	73.3255699343725	70.9088623851157	67.0099273597842	60.4162559326566	47.8259588149893	15.3421836684758	0
75.8501723168609	75.603148990991	74.8039917148314	73.3281960332866	70.9116763464898	67.0128930916502	60.4191604877669	47.8284294681467	15.3439423371795	0
75.8525453786579	75.6055481698363	74.8064738589257	73.3308203906738	70.9144849871877	67.0158455075013	60.4220407026939	47.830868523386	15.3456668869485	0
75.8549181876574	75.6079470283513	74.8089553787349	73.333442948725	70.9172882049344	67.0187845698859	60.4248968599568	47.8332766671179	15.3473582316273	0
75.857290741527	75.610345560205	74.8114362530627	73.3360636493839	70.9200859001157	67.0217102478794	60.4277292413202	47.8356545640076	15.3490172476612	0
75.8596630377889	75.6127437587558	74.8139164601327	73.3386824344077	70.9228779758021	67.024622516783	60.4305381274559	47.8380028578158	15.35064477613	0
75.8620350738133	75.6151416170467	74.8163959776019	73.3412992454246	70.9256643377661	67.0275213578305	60.4333237976419	47.840322172206	15.3522416246438	0
75.8644068468126	75.6175391278019	74.8188747825754	73.34391402399	70.9284448944927	67.0304067579039	60.4360865294924	47.8426131115194	15.3538085691128	0
75.866778353836	75.6199362834232	74.8213528516216	73.3465267116415	70.9312195571844	67.0332787092574	60.4388265987185	47.844876261518	15.3553463554016	0
75.869149591763	75.6223330759867	74.8238301607876	73.3491372499507	70.93398823976	67.0361372092508	60.4415442789157	47.8471121900964	15.3568557008763	0
75.8715205572984	75.6247294972407	74.8263066856161	73.3517455805741	70.9367508588485	67.0389822600913	60.4442398413764	47.8493214479646	15.358337295853	0
75.8738912469662	75.6271255386032	74.8287824011616	73.3543516453014	70.9395073337788	67.0418138685846	60.4469135549247	47.8515045693018	15.3597918049548	0
75.8762616571048	75.6295211911601	74.8312572820076	73.3569553861022	70.9422575865644	67.0446320458947	60.4495656857722	47.853662072382	15.3612198683848	0
75.8786317838614	75.6319164456643	74.8337313022845	73.3595567451705	70.945001541884	67.0474368073129	60.4521964973928	47.8557944601739	15.3626221031205	0
75.8810016231865	75.6343112925344	74.8362044356869	73.3621556649671	70.9477391270598	67.0502281720352	60.4548062504144	47.8579022209145	15.3639991040362	0
75.8833711708297	75.6367057218544	74.8386766554919	73.3647520882604	70.9504702720307	67.0530061629487	60.4573952025263	47.8599858286589	15.3653514449579	0
75.8857404223345	75.6390997233736	74.8411479345774	73.3673459581648	70.9531949093238	67.0557708064261	60.4599636084009	47.8620457438059	15.3666796796558	0
75.8881093730336	75.6414932865069	74.8436182454401	73.3699372181772	70.9559129740232	67.0585221321286	60.4625117196284	47.8640824136019	15.3679843427787	0
75.8904780180444	75.6438864003354	74.8460875602145	73.372525812212	70.9586244037356	67.0612601728174	60.465039784663	47.8660962726225	15.3692659507348	0
75.8928463522653	75.6462790536076	74.8485558506912	73.3751116846337	70.9613291385544	67.0639849641723	60.4675480487798	47.8680877432345	15.3705250025215	0
75.8952143703709	75.6486712347406	74.8510230883354	73.3776947802876	70.964027121022	67.0666965446186	60.4700367540417	47.8700572360373	15.3717619805088	0
75.8975820668087	75.6510629318223	74.8534892443057	73.3802750445297	70.9667182960903	67.0693949551616	60.4725061392742	47.8720051502864	15.3729773511789	0
75.8999494357951	75.653454132613	74.8559542894725	73.3828524232528	70.9694026110793	67.0720802392276	60.4749564400493	47.8739318742986	15.3741715658252	0
75.9023164713125	75.6558448245483	74.8584181944365	73.3854268629132	70.9720800156353	67.0747524425129	60.4773878886749	47.8758377858399	15.3753450612124	0
75.9046831671053	75.6582349947416	74.860880929547	73.3879983105539	70.9747504616874	67.0774116128388	60.4798007141921	47.8777232524976	15.3764982602016	0
75.9070495166776	75.6606246299873	74.86334246492	73.390566713827	70.9774139034037	67.0800578000137	60.4821951423774	47.8795886320365	15.3776315723418	0
75.9094155132901	75.6630137167641	74.8658027704564	73.3931320210142	70.980070297146	67.0826910557016	60.4845713957502	47.8814342727402	15.3787453944303	0
75.9117811499577	75.6654022412385	74.86826181586	73.3956941810462	70.9827196014247	67.0853114332958	60.4869296935851	47.8832605137389	15.3798401110433	0
75.9141464194472	75.6677901892692	74.8707195706546	73.3982531435196	70.985361776853	67.0879189878	60.489270251928	47.8850676853224	15.3809160950396	0
75.9165113142751	75.6701775464108	74.8731760042018	73.4008088587136	70.9879967861005	67.0905137757135	60.4915932836163	47.8868561092418	15.3819737080382	0
75.9188758267057	75.6725642979184	74.8756310857179	73.4033612776044	70.990624593847	67.0930958549231	60.4938989983019	47.8886260989975	15.3830133008719	0
75.9212399487497	75.6749504287523	74.8780847842911	73.4059103518784	70.9932451667363	67.0956652845997	60.4961876024775	47.8903779601162	15.3840352140177	0
75.9236036721628	75.6773359235827	74.8805370688976	73.4084560339444	70.9958584733296	67.0982221250995	60.4984592995051	47.8921119904169	15.3850397780063	0
75.9259669884444	75.6797207667951	74.8829879084182	73.4109982769442	70.9984644840592	67.1007664378709	60.5007142896471	47.8938284802652	15.3860273138112	0
75.9283298888368	75.6821049424952	74.8854372716538	73.4135370347625	71.0010631711827	67.1032982853656	60.502952770099	47.895527712819	15.3869981332188	0
75.9306923643243	75.6844884345144	74.8878851273417	73.4160722620347	71.0036545087367	67.1058177309535	60.5051749350239	47.8972099642627	15.3879525391811	0
75.9330544056331	75.6868712264157	74.8903314441702	73.4186039141548	71.0062384724919	67.1083248388434	60.5073809755887	47.8988755040334	15.3888908261508	0
75.9354160032305	75.6892533014992	74.8927761907937	73.421131947281	71.0088150399077	67.1108196740059	60.509571080001	47.9005245950378	15.3898132804013	0
75.9377771473257	75.6916346428083	74.8952193358476	73.4236563183416	71.0113841900875	67.1133023021016	60.5117454335479	47.9021574938605	15.3907201803309	0
75.9401378278689	75.6940152331351	74.8976608479619	73.4261769850386	71.0139459037345	67.1157727894123	60.5139042186347	47.9037744509643	15.3916117967538	0
75.9424980345529	75.6963950550275	74.9001006957755	73.4286939058516	71.0165001631087	67.1182312027757	60.5160476148249	47.9053757108831	15.3924883931771	0
75.9448577568128	75.6987740907949	74.9025388479494	73.4312070400399	71.0190469519829	67.1206776095243	60.518175798881	47.9069615124065	15.3933502260652	0
75.9472169838271	75.7011523225145	74.9049752731797	73.4337163476442	71.0215862556012	67.1231120774263	60.520288944805	47.9085320887588	15.3941975450925	0
75.9495757045191	75.7035297320381	74.9074099402105	73.4362217894873	71.0241180606366	67.1255346746306	60.5223872238797	47.9100876677696	15.3950305933848	0
75.9519339075575	75.7059063009986	74.9098428178463	73.4387233271748	71.0266423551502	67.1279454696143	60.5244708047104	47.9116284720393	15.3958496077495	0
75.9542915813584	75.7082820108164	74.9122738749633	73.4412209230935	71.0291591285507	67.1303445311327	60.5265398532661	47.9131547190976	15.3966548188965	0
75.9566487140865	75.7106568427064	74.9147030805217	73.443714540411	71.0316683715549	67.1327319281731	60.5285945329216	47.9146666215565	15.3974464516488	0
75.9590052936572	75.7130307776843	74.9171304035765	73.4462041430733	71.0341700761481	67.1351077299097	60.5306350044984	47.9161643872576	15.3982247251444	0
75.9613613077383	75.7154037965739	74.9195558132881	73.4486896958024	71.0366642355467	67.1374720056618	60.5326614263067	47.9176482194136	15.3989898530294	0
75.9637167437525	75.7177758800136	74.9219792789331	73.4511711640932	71.03915084416	67.1398248248547	60.5346739541866	47.9191183167455	15.3997420436425	0
75.9660715888794	75.720147008463	74.9244007699141	73.45364851421	71.0416298975539	67.1421662569813	60.536672741549	47.9205748736136	15.400481500193	0
75.9684258300581	75.7225171622103	74.9268202557693	73.4561217131823	71.0441013924146	67.1444963715676	60.5386579394163	47.9220180801453	15.4012084209298	0
75.9707794539901	75.7248863213788	74.929237706182	73.4585907288	71.0465653265136	67.146815238139	60.540629696463	47.9234481223566	15.4019229993044	0
75.9731324471417	75.7272544659339	74.9316530909893	73.4610555296092	71.0490216986731	67.1491229261889	60.542588159056	47.9248651822709	15.4026254241272	0
75.9754847957471	75.7296215756896	74.9340663801909	73.4635160849056	71.0514705087325	67.1514195051492	60.5445334712938	47.9262694380326	15.4033158797169	0
75.9778364858117	75.731987630316	74.936477543957	73.46597236473	71.0539117575153	67.1537050443623	60.5464657750462	47.9276610640167	15.4039945460442	0
75.980187503115	75.7343526093455	74.9388865526365	73.468424339861	71.0563454467967	67.155979613055	60.5483852099929	47.9290402309355	15.40466159887	0
75.9825378332143	75.7367164921799	74.9412933767643	73.4708719818096	71.0587715792729	67.1582432803137	60.5502919136618	47.9304071059404	15.4053172098777	0
75.9848874614478	75.7390792580971	74.9436979870686	73.4733152628116	71.0611901585296	67.1604961150612	60.5521860214672	47.9317618527209	15.4059615468004	0
75.9872363729384	75.7414408862578	74.9461003544778	73.4757541558209	71.0636011890128	67.1627381860352	60.5540676667468	47.9331046316	15.4065947735433	0
75.9895845525977	75.7438013557124	74.9485004501267	73.4781886345026	71.066004675999	67.1649695617675	60.5559369807985	47.9344355996268	15.4072170503011	0
75.9919319851293	75.7461606454072	74.9508982453632	73.4806186732248	71.0684006255672	67.167190310565	60.5577940929171	47.9357549106651	15.4078285336714	0
75.994278655033	75.7485187341914	74.9532937117537	73.4830442470512	71.0707890445708	67.1694005004921	60.5596391304296	47.9370627154796	15.4084293767628	0
75.9966245466089	75.7508756008235	74.9556868210892	73.4854653317335	71.073169940611	67.1716001993532	60.5614722187306	47.9383591618192	15.4090197293003	0
75.9989696439612	75.7532312239776	74.9580775453902	73.4878819037027	71.0755433220102	67.1737894746778	60.5632934813168	47.9396443944975	15.4095997377253	0
76.0013139310029	75.75558558225	74.9604658569119	73.4902939400613	71.0779091977861	67.1759683937053	60.5651030398215	47.9409185554706	15.4101695452928	0
76.0036573914595	75.7579386541657	74.9628517281488	73.4927014185746	71.0802675776274	67.1781370233715	60.5669010140475	47.942181783912	15.410729292165	0
76.0060000088738	75.7602904181843	74.9652351318393	73.4951043176627	71.082618471869	67.180295430296	60.5686875220006	47.9434342162859	15.4112791155007	0
76.0083417666099	75.7626408527062	74.9676160409696	73.4975026163913	71.0849618914683	67.1824436807704	60.5704626799215	47.9446759864172	15.4118191495425	0
76.0106826478583	75.7649899360793	74.9699944287781	73.4998962944632	71.0872978479827	67.184581840747	60.5722266023181	47.9459072255601	15.4123495256999	0
76.0130226356397	75.7673376466042	74.9723702687585	73.5022853322098	71.0896263535468	67.186709975829	60.5739794019966	47.9471280624635	15.4128703726302	0
76.0153617128101	75.7696839625407	74.9747435346636	73.5046697105817	71.0919474208506	67.188828151261	60.5757211900919	47.9483386234353	15.4133818163158	0
76.0176998620654	75.7720288621138	74.9771142005081	73.5070494111405	71.0942610631189	67.19093643192	60.5774520760982	47.9495390324044	15.4138839801393	0
76.0200370659457	75.7743723235188	74.9794822405722	73.509424416049	71.09656729409	67.1930348823079	60.5791721678985	47.9507294109799	15.414376984956	0
76.0223733068405	75.7767143249277	74.9818476294032	73.511794708063	71.0988661279963	67.1951235665437	60.5808815717933	47.9519098785101	15.4148609491632	0
76.0247085669931	75.7790548444944	74.9842103418193	73.5141602705217	71.1011575795448	67.1972025483569	60.5825803925296	47.9530805521379	15.4153359887679	0
76.0270428285058	75.7813938603605	74.9865703529108	73.5165210873393	71.103441663898	67.1992718910817	60.5842687333287	47.9542415468559	15.4158022174517	0
76.029376073344	75.7837313506602	74.9889276380426	73.5188771429952	71.1057183966558	67.2013316576508	60.5859466959136	47.9553929755586	15.4162597466337	0
76.0317082833418	75.7860672935264	74.9912821728562	73.5212284225257	71.1079877938377	67.2033819105907	60.5876143805358	47.9565349490944	15.4167086855313	0
76.0340394402063	75.7884016670951	74.9936339332708	73.5235749115146	71.1102498718656	67.2054227120169	60.5892718860021	47.9576675763147	15.4171491412184	0
76.0363695255228	75.7907344495112	74.9959828954857	73.5259165960844	71.1125046475468	67.2074541236302	60.5909193097002	47.958790964122	15.4175812186829	0
76.0386985207594	75.7930656189331	74.9983290359806	73.5282534628873	71.1147521380582	67.2094762067125	60.5925567476243	47.9599052175171	15.4180050208805	0
76.041026407272	75.7953951535379	75.0006723315174	73.5305854990961	71.11699236093	67.2114890221238	60.5941842943998	47.9610104396439	15.4184206487887	0
76.0433531663091	75.797723031526	75.0030127591409	73.5329126923956	71.1192253340308	67.2134926302996	60.5958020433079	47.9621067318339	15.4188282014573	0
76.0456787790169	75.8000492311261	75.0053502961795	73.5352350309738	71.1214510755527	67.2154870912479	60.5974100863096	47.9631941936483	15.4192277760586	0
76.0480032264438	75.8023737305995	75.007684920246	73.5375525035129	71.1236696039967	67.2174724645476	60.599008514069	47.96427292292	15.419619467935	0
76.0503264895453	75.8046965082449	75.0100166092383	73.5398650991805	71.1258809381588	67.2194488093463	60.6005974159764	47.9653430157934	15.4200033706455	0
76.0526485491891	75.8070175424028	75.012345341339	73.5421728076216	71.1280850971166	67.2214161843592	60.6021768801709	47.9664045667636	15.420379576011	0
76.0549693861597	75.8093368114599	75.0146710950165	73.5444756189491	71.1302821002163	67.2233746478676	60.6037469935626	47.9674576687143	15.4207481741575	0
76.0572889811632	75.811654293853	75.0169938490243	73.5467735237359	71.1324719670594	67.2253242577185	60.605307841854	47.9685024129549	15.4211092535587	0
76.0596073148321	75.8139699680734	75.0193135824014	73.5490665130063	71.134654717491	67.2272650713235	60.6068595095617	47.9695388892559	15.4214629010763	0
76.0619243677301	75.816283812671	75.021630274472	73.5513545782276	71.1368303715876	67.2291971456585	60.6084020800368	47.9705671858839	15.4218092020002	0
76.0642401203567	75.8185958062582	75.0239439048451	73.5536377113019	71.1389989496455	67.2311205372641	60.6099356354855	47.9715873896354	15.4221482400865	0
76.0665545531521	75.8209059275135	75.0262544534142	73.5559159045579	71.1411604721695	67.2330353022451	60.6114602569892	47.9725995858694	15.4224800975948	0
76.0688676465015	75.8232141551855	75.0285619003568	73.5581891507425	71.1433149598624	67.2349414962711	60.6129760245238	47.9736038585399	15.4228048553243	0
76.0711793807399	75.8255204680965	75.0308662261334	73.5604574430133	71.1454624336139	67.236839174577	60.6144830169795	47.9746002902263	15.423122592649	0
76.073489736157	75.827824845146	75.0331674114873	73.56272077493	71.147602914491	67.2387283919637	60.6159813121788	47.9755889621639	15.4234333875512	0
76.0757986930011	75.8301272653141	75.0354654374435	73.5649791404474	71.1497364237278	67.240609202799	60.6174709868959	47.9765699542736	15.4237373166546	0
76.0781062314842	75.8324277076651	75.0377602853076	73.5672325339067	71.1518629827161	67.2424816610186	60.618952116874	47.9775433451895	15.4240344552565	0
76.0804123317858	75.8347261513504	75.0400519366652	73.5694809500287	71.1539826129958	67.2443458201273	60.6204247768436	47.978509212288	15.4243248773584	0
76.0827169740581	75.8370225756119	75.0423403733805	73.5717243839057	71.1560953362465	67.2462017332004	60.6218890405394	47.9794676317136	15.4246086556963	0
76.0850201384296	75.8393169597852	75.0446255775953	73.5739628309942	71.1582011742784	67.2480494528852	60.6233449807177	47.980418678406	15.4248858617698	0
76.0873218050101	75.8416092833022	75.0469075317276	73.5761962871076	71.1603001490241	67.2498890314025	60.624792669173	47.9813624261254	15.4251565658707	0
76.0896219538942	75.8438995256944	75.0491862184706	73.5784247484088	71.1623922825307	67.2517205205485	60.6262321767544	47.9822989474776	15.4254208371103	0
76.0919205651663	75.8461876665955	75.0514616207909	73.5806482114032	71.1644775969513	67.2535439716965	60.6276635733813	47.9832283139381	15.4256787434462	0
76.0942176189041	75.8484736857442	75.0537337219273	73.5828666729316	71.1665561145381	67.2553594357989	60.6290869280596	47.9841505958758	15.4259303517082	0
76.096513095183	75.8507575629866	75.0560025053894	73.5850801301631	71.1686278576348	67.2571669633893	60.6305023088969	47.985065862576	15.4261757276241	0
76.0988069740803	75.8530392782792	75.0582679549557	73.5872885805884	71.1706928486694	67.2589666045845	60.6319097831176	47.9859741822629	15.4264149358433	0
76.1010992356786	75.8553188116909	75.0605300546724	73.5894920220129	71.1727511101474	67.2607584090871	60.6333094170774	47.9868756221214	15.4266480399615	0
76.1033898600706	75.8575961434057	75.0627887888515	73.5916904525504	71.1748026646454	67.2625424261871	60.6347012762786	47.9877702483181	15.4268751025436	0
76.1056788273621	75.8598712537249	75.0650441420689	73.5938838706159	71.1768475348042	67.2643187047649	60.6360854253835	47.9886581260228	15.4270961851462	0
76.1079661176763	75.8621441230691	75.0672960991631	73.5960722749198	71.1788857433232	67.2660872932937	60.6374619282286	47.9895393194276	15.4273113483395	0
76.1102517111575	75.8644147319808	75.0695446452332	73.5982556644611	71.1809173129538	67.2678482398415	60.6388308478387	47.9904138917677	15.4275206517288	0
76.1125355879747	75.866683061126	75.0717897656368	73.6004340385215	71.1829422664941	67.2696015920743	60.6401922464396	47.9912819053396	15.4277241539751	0
76.1148177283251	75.8689490912966	75.0740314459887	73.6026073966589	71.1849606267832	67.2713473972581	60.6415461854717	47.9921434215205	15.4279219128154	0
76.1170981124381	75.8712128034117	75.0762696721583	73.6047757387016	71.1869724166955	67.2730857022621	60.6428927256028	47.9929985007865	15.4281139850823	0
76.1193767205783	75.8734741785202	75.0785044302683	73.6069390647423	71.1889776591358	67.2748165535611	60.6442319267407	47.9938472027299	15.4283004267232	0
76.1216535330492	75.875733197802	75.0807357066923	73.609097375132	71.1909763770343	67.2765399972384	60.6455638480454	47.9946895860771	15.4284812928186	0
76.1239285301965	75.8779898425697	75.0829634880529	73.6112506704747	71.1929685933416	67.2782560789882	60.6468885479416	47.995525708705	15.4286566376009	0
76.1262016924115	75.8802440942708	75.08518776122	73.6133989516214	71.194954331024	67.279964844119	60.6482060841303	47.9963556276582	15.4288265144712	0
76.1284730001341	75.8824959344882	75.0874085133082	73.6155422196647	71.1969336130589	67.281666337556	60.6495165136007	47.9971793991645	15.4289909760172	0
76.1307424338563	75.8847453449429	75.0896257316752	73.617680475933	71.1989064624307	67.2833606038443	60.6508198926415	47.9979970786506	15.4291500740294	0
76.1330099741253	75.8869923074944	75.0918394039195	73.6198137219858	71.2008729021263	67.2850476871513	60.652116276852	47.9988087207582	15.4293038595179	0
76.1352756015461	75.8892368041425	75.0940495178784	73.6219419596076	71.2028329551315	67.2867276312702	60.6534057211535	47.9996143793579	15.4294523827278	0
76.1375392967851	75.8914788170287	75.0962560616257	73.6240651908035	71.2047866444264	67.2884004796224	60.6546882797998	48.0004141075646	15.4295956931551	0
76.1398010405725	75.8937183284369	75.0984590234698	73.6261834177935	71.2067339929821	67.2900662752609	60.6559640063879	48.0012079577516	15.4297338395616	0
76.1420608137057	75.8959553207952	75.1006583919515	73.6282966430079	71.208675023757	67.2917250608729	60.6572329538683	48.0019959815642	15.4298668699893	0
76.1443185970515	75.8981897766766	75.1028541558418	73.630404869082	71.2106097596932	67.2933768787831	60.6584951745552	48.0027782299337	15.4299948317755	0
76.1465743715492	75.9004216787999	75.1050463041396	73.6325080988517	71.2125382237132	67.2950217709561	60.6597507201367	48.0035547530905	15.4301177715658	0
76.1488281182134	75.9026510100312	75.1072348260698	73.6346063353486	71.2144604387165	67.2966597790003	60.6609996416844	48.004325600577	15.4302357353288	0
76.151079818136	75.9048777533843	75.1094197110811	73.6366995817951	71.2163764275768	67.2982909441698	60.6622419896631	48.0050908212605	15.4303487683682	0
76.1533294524896	75.9071018920217	75.1116009488436	73.6387878416004	71.2182862131385	67.2999153073684	60.6634778139402	48.0058504633454	15.4304569153368	0
76.155577002529	75.9093234092557	75.1137785292469	73.6408711183553	71.2201898182142	67.3015329091519	60.664707163795	48.0066045743852	15.4305602202487	0
76.1578224495946	75.9115422885487	75.1159524423975	73.6429494158285	71.2220872655819	67.3031437897312	60.6659300879277	48.0073532012945	15.4306587264913	0
76.160065775114	75.9137585135144	75.118122678617	73.6450227379618	71.2239785779819	67.3047479889757	60.6671466344685	48.0080963903607	15.4307524768381	0
76.1623069606046	75.9159720679178	75.1202892284401	73.6470910888663	71.2258637781148	67.3063455464156	60.6683568509862	48.0088341872547	15.4308415134597	0
76.1645459876759	75.9181829356764	75.1224520826115	73.6491544728177	71.2277428886384	67.3079365012457	60.6695607844968	48.0095666370427	15.4309258779357	0
76.1667828380315	75.9203911008606	75.1246112320849	73.6512128942527	71.229615932166	67.3095208923276	60.6707584814721	48.0102937841962	15.4310056112658	0
76.1690174934713	75.922596547694	75.12676666802	73.6532663577649	71.2314829312634	67.311098758193	60.6719499878477	48.0110156726033	15.4310807538807	0
76.1712499358936	75.924799260554	75.1289183817805	73.6553148681009	71.2333439084474	67.3126701370468	60.6731353490314	48.0117323455783	15.4311513456525	0
76.1734801472967	75.9269992239722	75.131066364932	73.6573584301562	71.235198886183	67.3142350667696	60.6743146099107	48.0124438458724	15.4312174259055	0
76.1757081097815	75.9291964226348	75.1332106092401	73.6593970489717	71.237047886882	67.3157935849213	60.6754878148614	48.013150215683	15.4312790334263	0
76.1779338055529	75.931390841383	75.1353511066676	73.6614307297301	71.2388909329006	67.3173457287432	60.6766550077545	48.0138514966638	15.4313362064735	0
76.1801572169216	75.9335824652129	75.1374878493731	73.6634594777521	71.2407280465378	67.3188915351617	60.6778162319642	48.014547729934	15.4313889827875	0
76.1823783263062	75.9357712792764	75.139620829708	73.6654832984927	71.2425592500335	67.3204310407906	60.6789715303751	48.0152389560874	15.4314373996001	0
76.1845971162345	75.9379572688806	75.1417500402153	73.6675021975382	71.2443845655668	67.3219642819342	60.6801209453896	48.0159252152019	15.4314814936434	0
76.1868135693453	75.9401404194887	75.1438754736267	73.6695161806023	71.2462040152545	67.3234912945903	60.681264518935	48.0166065468476	15.4315213011595	0
76.1890276683902	75.9423207167196	75.1459971228609	73.6715252535232	71.2480176211492	67.3250121144529	60.6824022924704	48.0172829900961	15.4315568579086	0
76.1912393962348	75.9444981463485	75.1481149810215	73.6735294222599	71.2498254052383	67.3265267769151	60.6835343069938	48.0179545835287	15.4315881991779	0
76.1934487358604	75.9466726943063	75.1502290413945	73.6755286928893	71.2516273894422	67.3280353170716	60.6846606030484	48.0186213652445	15.4316153597904	0
76.1956556703653	75.9488443466802	75.1523392974468	73.6775230716031	71.2534235956129	67.329537769722	60.68578122073	48.0192833728689	15.4316383741125	0
76.1978601829663	75.9510130897133	75.1544457428236	73.6795125647044	71.255214045533	67.3310341693733	60.6868961996926	48.0199406435612	15.4316572760627	0
76.2000622569997	75.9531789098048	75.1565483713467	73.681497178605	71.2569987609143	67.3325245502428	60.6880055791556	48.0205932140222	15.4316720991189	0
76.2022618759232	75.9553417935098	75.1586471770121	73.6834769198222	71.2587777633965	67.3340089462606	60.6891093979097	48.0212411205025	15.4316828763267	0
76.2044590233165	75.9575017275392	75.1607421539885	73.6854517949763	71.2605510745462	67.3354873910725	60.690207694323	48.0218843988092	15.4316896403064	0
76.2066536828827	75.9596586987594	75.1628332966146	73.6874218107872	71.262318715856	67.3369599180429	60.6913005063473	48.0225230843135	15.4316924232606	0
76.2088458384495	75.9618126941926	75.1649205993978	73.6893869740723	71.2640807087431	67.3384265602571	60.6923878715239	48.0231572119579	15.4316912569816	0
76.2110354739703	75.9639637010159	75.1670040570115	73.6913472917431	71.2658370745485	67.339887350524	60.6934698269895	48.0237868162631	15.4316861728583	0
76.213222573525	75.9661117065617	75.1690836642937	73.693302770803	71.2675878345364	67.3413423213791	60.6945464094821	48.0244119313347	15.4316772018827	0
76.215407121321	75.9682566983172	75.1711594162446	73.6952534183446	71.2693330098926	67.342791505087	60.6956176553463	48.0250325908702	15.4316643746575	0
76.2175891016945	75.9703986639239	75.1732313080251	73.6971992415471	71.2710726217246	67.3442349336437	60.6966836005393	48.0256488281655	15.431647721402	0
76.2197684991111	75.9725375911778	75.1752993349543	73.6991402476738	71.27280669106	67.3456726387795	60.6977442806358	48.0262606761209	15.4316272719589	0
76.2219452981664	75.9746734680283	75.1773634925081	73.7010764440696	71.2745352388462	67.3471046519615	60.698799730834	48.0268681672482	15.4316030558004	0
76.2241194835873	75.9768062825788	75.1794237763169	73.7030078381589	71.2762582859497	67.348531004396	60.6998499859604	48.0274713336761	15.4315751020347	0
76.2262910402327	75.9789360230854	75.1814801821641	73.7049344374429	71.2779758531553	67.3499517270313	60.7008950804752	48.0280702071567	15.4315434394119	0
76.2284599530936	75.9810626779573	75.1835327059838	73.7068562494974	71.2796879611656	67.3513668505599	60.7019350484773	48.0286648190715	15.4315080963299	0
76.2306262072947	75.9831862357555	75.1855813438593	73.7087732819707	71.2813946306004	67.3527764054213	60.7029699237092	48.0292552004367	15.4314691008401	0
76.2327897880941	75.9853066851933	75.1876260920209	73.7106855425814	71.283095881996	67.354180421804	60.7039997395622	48.0298413819097	15.4314264806534	0
76.2349506808848	75.9874240151351	75.1896669468445	73.712593039116	71.2847917358051	67.3555789296485	60.705024529081	48.0304233937938	15.4313802631458	0
76.2371088711944	75.9895382145962	75.1917039048494	73.7144957794271	71.2864822123958	67.3569719586493	60.7060443249687	48.0310012660445	15.4313304753634	0
76.2392643446862	75.9916492727424	75.1937369626967	73.7163937714311	71.2881673320518	67.3583595382572	60.707059159591	48.0315750282743	15.4312771440281	0
76.2414170871595	75.9937571788891	75.1957661171876	73.7182870231065	71.2898471149714	67.3597416976824	60.7080690649814	48.0321447097581	15.4312202955427	0
76.24356708455	75.9958619225013	75.1977913652614	73.7201755424914	71.2915215812674	67.3611184658958	60.7090740728453	48.0327103394387	15.4311599559965	0
76.2457143229303	75.9979634931924	75.1998127039938	73.7220593376822	71.2931907509668	67.3624898716323	60.7100742145643	48.0332719459314	15.4310961511693	0
76.24785878851	76.0000618807243	75.2018301305955	73.7239384168314	71.2948546440107	67.3638559433925	60.7110695212013	48.0338295575292	15.4310289065375	0
76.2500004676365	76.0021570750063	75.20384364241	73.7258127881456	71.2965132802532	67.3652167094451	60.712060023504	48.0343832022078	15.4309582472781	0
76.2521393467948	76.0042490660945	75.2058532369123	73.7276824598841	71.2981666794623	67.3665721978293	60.7130457519095	48.0349329076301	15.4308841982738	0
76.2542754126081	76.0063378441916	75.2078589117069	73.7295474403566	71.2998148613187	67.367922436357	60.7140267365483	48.0354787011511	15.4308067841175	0
76.256408651838	76.0084233996459	75.2098606645264	73.7314077379222	71.3014578454161	67.369267452615	60.7150030072488	48.0360206098225	15.4307260291169	0
76.2585390513844	76.0105057229507	75.2118584932298	73.7332633609869	71.303095651261	67.3706072739672	60.7159745935405	48.036558660397	15.430641957299	0
76.2606665982861	76.0125848047436	75.2138523958008	73.7351143180026	71.3047282982724	67.3719419275567	60.7169415246589	48.0370928793331	15.4305545924143	0
76.2627912797207	76.0146606358062	75.215842370346	73.7369606174653	71.3063558057817	67.3732714403081	60.7179038295487	48.037623292799	15.4304639579415	0
76.2649130830047	76.0167332070627	75.2178284150937	73.7388022679131	71.3079781930327	67.3745958389296	60.7188615368679	48.0381499266774	15.4303700770909	0
76.2670319955937	76.0188025095798	75.2198105283921	73.7406392779255	71.3095954791812	67.375915149915	60.7198146749916	48.0386728065692	15.4302729728094	0
76.2691480050821	76.0208685345659	75.2217887087079	73.7424716561209	71.3112076832955	67.3772293995459	60.7207632720153	48.0391919577979	15.4301726677841	0
76.2712610992038	76.0229312733702	75.2237629546243	73.7442994111561	71.312814824356	67.3785386138939	60.7217073557593	48.0397074054136	15.4300691844461	0
76.2733712658314	76.0249907174818	75.2257332648401	73.7461225517241	71.3144169212549	67.3798428188224	60.7226469537716	48.0402191741967	15.4299625449747	0
76.2754784929769	76.0270468585296	75.2276996381677	73.747941086553	71.3160139927967	67.3811420399887	60.7235820933317	48.0407272886625	15.4298527713012	0
76.2775827687909	76.0290996882807	75.2296620735317	73.7497550244048	71.3176060576982	67.3824363028462	60.7245128014541	48.0412317730639	15.4297398851123	0
76.2796840815634	76.0311491986403	75.2316205699678	73.7515643740737	71.3191931345881	67.3837256326462	60.7254391048914	48.0417326513964	15.4296239078543	0
76.2817824197227	76.0331953816509	75.2335751266207	73.753369144385	71.3207752420072	67.3850100544398	60.7263610301383	48.0422299474007	15.429504860736	0
76.2838777718361	76.0352382294908	75.2355257427431	73.7551693441936	71.3223523984088	67.3862895930802	60.7272786034342	48.0427236845672	15.4293827647329	0
76.2859701266092	76.0372777344743	75.2374724176941	73.7569649823832	71.3239246221585	67.3875642732244	60.7281918507669	48.0432138861388	15.4292576405903	0
76.2880594728861	76.0393138890502	75.239415150938	73.7587560678646	71.325491931534	67.3888341193349	60.7291007978758	48.0437005751149	15.4291295088268	0
76.290145799649	76.0413466858014	75.2413539420425	73.7605426095745	71.327054344726	67.3900991556822	60.7300054702545	48.0441837742547	15.4289983897376	0
76.2922290960179	76.0433761174437	75.2432887906776	73.7623246164748	71.3286118798375	67.3913594063458	60.7309058931548	48.0446635060806	15.4288643033976	0
76.2943093512504	76.0454021768253	75.2452196966141	73.7641020975511	71.3301645548843	67.3926148952172	60.7318020915891	48.0451397928811	15.4287272696652	0
76.2963865547418	76.0474248569261	75.2471466597225	73.7658750618114	71.3317123877953	67.3938656460005	60.7326940903334	48.0456126567149	15.4285873081846	0
76.2984606960241	76.0494441508564	75.2490696799712	73.7676435182854	71.3332553964125	67.3951116822153	60.7335819139307	48.0460821194132	15.4284444383896	0
76.3005317647664	76.0514600518564	75.2509887574257	73.7694074760234	71.3347935984908	67.3963530271975	60.7344655866937	48.0465482025834	15.4282986795063	0
76.3025997507741	76.0534725532954	75.2529038922468	73.7711669440948	71.336327011699	67.3975897041022	60.7353451327074	48.047010927612	15.4281500505561	0
76.3046646439889	76.0554816486708	75.2548150846896	73.7729219315878	71.3378556536192	67.3988217359044	60.7362205758322	48.0474703156675	15.4279985703589	0
76.3067264344879	76.0574873316071	75.2567223351022	73.7746724476076	71.3393795417474	67.4000491454015	60.7370919397068	48.0479263877039	15.4278442575356	0
76.3087851124841	76.0594895958557	75.2586256439243	73.7764185012761	71.3408986934939	67.4012719552144	60.7379592477507	48.0483791644628	15.427687130511	0
76.310840668325	76.0614884352933	75.260525011686	73.7781601017306	71.342413126183	67.4024901877899	60.738822523167	48.048828666477	15.4275272075169	0
76.3128930924929	76.0634838439213	75.2624204390069	73.7798972581229	71.3439228570535	67.4037038654018	60.7396817889449	48.049274914073	15.4273645065944	0
76.3149423756043	76.0654758158653	75.264311926594	73.7816299796186	71.3454279032592	67.4049130101528	60.7405370678626	48.0497179273739	15.4271990455969	0
76.3169885084093	76.0674643453736	75.2661994752417	73.783358275396	71.3469282818685	67.4061176439765	60.7413883824896	48.0501577263018	15.4270308421925	0
76.3190314817912	76.069449426817	75.2680830858294	73.7850821546452	71.3484240098655	67.4073177886382	60.7422357551896	48.0505943305812	15.4268599138668	0
76.3210712867661	76.0714310546872	75.2699627593213	73.7868016265675	71.3499151041496	67.4085134657373	60.7430792081226	48.0510277597408	15.4266862779251	0
76.3231079144825	76.0734092235968	75.2718384967645	73.7885167003743	71.351401581536	67.4097046967087	60.7439187632474	48.0514580331168	15.4265099514954	0
76.3251413562204	76.0753839282775	75.2737102992885	73.7902273852865	71.3528834587559	67.4108915028241	60.7447544423244	48.0518851698548	15.4263309515303	0
76.3271716033913	76.07735516358	75.2755781681034	73.7919336905337	71.3543607524572	67.412073905194	60.7455862669177	48.0523091889131	15.4261492948098	0
76.3291986475372	76.0793229244728	75.2774421044993	73.7936356253533	71.3558334792041	67.4132519247688	60.7464142583973	48.0527301090644	15.4259649979435	0
76.3312224803306	76.0812872060412	75.2793021098449	73.7953331989898	71.3573016554779	67.4144255823407	60.747238437942	48.0531479488987	15.4257780773731	0
76.3332430935733	76.0832480034866	75.2811581855866	73.7970264206942	71.3587652976774	67.4155948985452	60.7480588265409	48.0535627268256	15.4255885493742	0
76.3352604791963	76.0852053121256	75.283010333247	73.7987152997232	71.3602244221185	67.4167598938623	60.7488754449963	48.0539744610764	15.4253964300593	0
76.3372746292592	76.0871591273892	75.2848585544246	73.8003998453383	71.3616790450355	67.4179205886184	60.7496883139257	48.054383169707	15.4252017353793	0
76.3392855359492	76.0891094448218	75.2867028507919	73.8020800668055	71.3631291825808	67.4190770029873	60.7504974537638	48.0547888705994	15.4250044811261	0
76.3412931915812	76.0910562600802	75.2885432240949	73.8037559733945	71.3645748508251	67.4202291569923	60.7513028847649	48.0551915814645	15.4248046829346	0
76.3432975885965	76.092999568933	75.2903796761517	73.8054275743779	71.3660160657584	67.4213770705069	60.7521046270051	48.0555913198442	15.4246023562847	0
76.3452987195625	76.0949393672597	75.2922122088518	73.8070948790306	71.3674528432896	67.4225207632568	60.752902700384	48.0559881031135	15.4243975165037	0
76.3472965771723	76.0968756510496	75.294040824155	73.8087578966295	71.3688851992474	67.423660254821	60.753697124627	48.0563819484825	15.4241901787678	0
76.3492911542435	76.0988084164011	75.2958655240903	73.8104166364524	71.3703131493803	67.4247955646335	60.7544879192876	48.0567728729986	15.4239803581046	0
76.3512824437181	76.1007376595206	75.2976863107549	73.812071107778	71.3717367093572	67.4259267119844	60.7552751037489	48.0571608935489	15.4237680693947	0
76.3532704386615	76.1026633767222	75.2995031863134	73.8137213198847	71.3731558947676	67.4270537160211	60.756058697226	48.0575460268616	15.4235533273738	0
76.3552551322621	76.1045855644259	75.3013161529966	73.8153672820506	71.3745707211219	67.4281765957504	60.7568387187674	48.0579282895086	15.4233361466348	0
76.3572365178303	76.1065042191577	75.3031252131009	73.8170090035525	71.3759812038519	67.429295370039	60.7576151872578	48.0583076979069	15.4231165416292	0
76.3592145887982	76.1084193375481	75.3049303689869	73.8186464936659	71.3773873583111	67.4304100576152	60.758388121419	48.058684268321	15.4228945266691	0
76.3611893387187	76.1103309163314	75.3067316230788	73.8202797616639	71.3787891997753	67.4315206770705	60.7591575398125	48.0590580168648	15.4226701159294	0
76.3631607612647	76.1122389523448	75.3085289778635	73.8219088168171	71.3801867434424	67.4326272468601	60.759923460841	48.059428959503	15.4224433234489	0
76.3651288502289	76.1141434425278	75.3103224358895	73.8235336683929	71.3815800044333	67.4337297853052	60.7606859027504	48.0597971120534	15.4222141631327	0
76.3670935995224	76.1160443839208	75.312111999766	73.8251543256553	71.3829689977922	67.4348283105932	60.7614448836312	48.0601624901887	15.4219826487535	0
76.3690550031746	76.1179417736649	75.3138976721624	73.826770797864	71.3843537384868	67.4359228407801	60.7622004214209	48.0605251094381	15.4217487939533	0
76.3710130553321	76.1198356090004	75.3156794558068	73.8283830942743	71.3857342414086	67.4370133937907	60.762952533905	48.060884985189	15.4215126122455	0
76.3729677502582	76.1217258872664	75.3174573534858	73.8299912241367	71.3871105213737	67.4380999874204	60.7637012387195	48.061242132689	15.4212741170158	0
76.374919082332	76.1236126058996	75.319231368043	73.8315951966962	71.3884825931228	67.4391826393364	60.7644465533518	48.0615965670475	15.4210333215246	0
76.3768670460481	76.125495762434	75.3210015023788	73.8331950211919	71.3898504713216	67.4402613670786	60.7651884951431	48.0619483032375	15.4207902389079	0
76.3788116360151	76.1273753544994	75.322767759449	73.8347907068568	71.3912141705616	67.4413361880613	60.7659270812893	48.0622973560967	15.4205448821795	0
76.3807528469557	76.1292513798208	75.3245301422645	73.8363822629175	71.3925737053597	67.4424071195738	60.7666623288433	48.0626437403301	15.420297264232	0
76.3826906737054	76.1311238362177	75.32628865389	73.8379696985933	71.3939290901596	67.4434741787819	60.7673942547164	48.0629874705107	15.4200473978386	0
76.3846251112119	76.1329927216031	75.3280432974435	73.8395530230962	71.3952803393313	67.4445373827291	60.7681228756794	48.0633285610815	15.4197952956544	0
76.3865561545346	76.1348580339828	75.3297940760954	73.8411322456307	71.3966274671719	67.4455967483376	60.768848208365	48.0636670263572	15.4195409702181	0
76.3884837988434	76.1367197714544	75.331540993068	73.8427073753931	71.3979704879061	67.4466522924094	60.7695702692684	48.0640028805254	15.4192844339534	0
76.3904080394183	76.1385779322065	75.333284051634	73.8442784215712	71.3993094156862	67.4477040316275	60.7702890747498	48.0643361376483	15.4190256991702	0
76.3923288716486	76.140432514518	75.3350232551168	73.8458453933441	71.4006442645928	67.4487519825572	60.771004641035	48.0646668116642	15.4187647780662	0
76.3942462910321	76.1422835167571	75.3367586068887	73.8474082998817	71.4019750486353	67.4497961616466	60.7717169842175	48.0649949163889	15.4185016827282	0
76.3961602931742	76.1441309373807	75.3384901103708	73.8489671503448	71.4033017817518	67.4508365852286	60.7724261202596	48.0653204655171	15.4182364251335	0
76.3980708737875	76.1459747749332	75.3402177690321	73.8505219538842	71.4046244778101	67.4518732695209	60.7731320649939	48.0656434726241	15.4179690171512	0
76.3999780286905	76.1478150280463	75.3419415863889	73.8520727196407	71.4059431506075	67.4529062306281	60.7738348341248	48.0659639511668	15.4176994705435	0
76.4018817538073	76.1496516954375	75.3436615660036	73.8536194567449	71.4072578138718	67.453935484542	60.7745344432301	48.0662819144854	15.4174277969671	0
76.4037820451669	76.1514847759097	75.3453777114848	73.8551621743167	71.408568481261	67.4549610471428	60.7752309077617	48.0665973758048	15.4171540079744	0
76.4056788989019	76.1533142683503	75.3470900264857	73.8567008814652	71.4098751663644	67.4559829342006	60.7759242430478	48.0669103482356	15.4168781150146	0
76.4075723112481	76.1551401717306	75.3487985147041	73.8582355872883	71.4111778827026	67.4570011613756	60.7766144642936	48.0672208447756	15.4166001294353	0
76.4094622785439	76.1569624851045	75.3505031798815	73.8597663008726	71.4124766437278	67.45801574422	60.7773015865828	48.0675288783114	15.4163200624835	0
76.4113487972292	76.1587812076082	75.3522040258024	73.8612930312928	71.4137714628246	67.4590266981783	60.7779856248793	48.0678344616192	15.4160379253066	0
76.4132318638446	76.1605963384593	75.3539010562934	73.862815787612	71.41506235331	67.4600340385886	60.7786665940278	48.0681376073665	15.415753728954	0
76.4151114750309	76.1624078769556	75.355594275223	73.8643345788808	71.4163493284339	67.4610377806834	60.7793445087556	48.0684383281129	15.415467484378	0
76.4169876275283	76.1642158224751	75.3572836865008	73.8658494141378	71.4176324013796	67.4620379395909	60.7800193836737	48.0687366363118	15.415179202435	0
76.4188603181755	76.1660201744745	75.3589692940766	73.8673603024086	71.4189115852641	67.4630345303357	60.7806912332779	48.0690325443113	15.4148888938866	0
76.4207295439088	76.1678209324889	75.36065110194	73.8688672527064	71.4201868931386	67.4640275678395	60.7813600719503	48.0693260643555	15.414596569401	0
76.4225953017617	76.1696180961305	75.3623291141199	73.8703702740309	71.4214583379887	67.4650170669227	60.7820259139602	48.0696172085859	15.4143022395534	0
76.4244575888639	76.1714116650887	75.3640033346834	73.8718693753688	71.4227259327349	67.4660030423048	60.7826887734656	48.0699059890419	15.414005914828	0
76.4263164024405	76.1732016391285	75.3656737677359	73.8733645656935	71.4239896902331	67.4669855086054	60.783348664514	48.0701924176629	15.4137076056184	0
76.4281717398114	76.1749880180899	75.3673404174198	73.8748558539644	71.4252496232747	67.4679644803453	60.784005601044	48.0704765062886	15.4134073222288	0
76.4300235983903	76.1767708018878	75.3690032879144	73.8763432491273	71.4265057445872	67.4689399719471	60.7846595968862	48.0707582666606	15.4131050748752	0
76.4318719756842	76.1785499905102	75.370662383435	73.8778267601138	71.4277580668346	67.4699119977364	60.7853106657642	48.0710377104233	15.4128008736863	0
76.4337168692924	76.1803255840186	75.3723177082324	73.8793063958417	71.4290066026177	67.4708805719425	60.785958821296	48.071314849125	15.4124947287045	0
76.4355582769059	76.1820975825463	75.3739692665926	73.8807821652139	71.4302513644745	67.4718457086992	60.786604076995	48.0715896942191	15.4121866498869	0
76.4373961963066	76.183865986298	75.3756170628359	73.8822540771191	71.4314923648806	67.4728074220461	60.7872464462709	48.071862257065	15.4118766471063	0
76.4392306253665	76.1856307955495	75.3772611013163	73.8837221404313	71.4327296162496	67.4737657259288	60.7878859424312	48.0721325489293	15.4115647301521	0
76.4410615620469	76.1873920106463	75.3789013864213	73.8851863640096	71.4339631309333	67.4747206342001	60.7885225786818	48.0724005809866	15.4112509087315	0
76.4428890043978	76.1891496320032	75.380537922571	73.8866467566979	71.4351929212224	67.4756721606209	60.7891563681283	48.0726663643208	15.41093519247	0
76.4447129505569	76.1909036601035	75.3821707142179	73.8881033273253	71.4364189993467	67.4766203188609	60.7897873237771	48.0729299099258	15.4106175909127	0
76.4465333987493	76.1926540954987	75.383799765846	73.8895560847054	71.4376413774754	67.4775651224994	60.7904154585361	48.0731912287069	15.4102981135251	0
76.448350347286	76.1944009388071	75.3854250819706	73.8910050376364	71.4388600677176	67.4785065850263	60.7910407852162	48.0734503314812	15.409976769694	0
76.450163794564	76.1961441907135	75.3870466671375	73.892450194901	71.4400750821227	67.4794447198426	60.7916633165316	48.073707228979	15.4096535687281	0
76.4519737390648	76.1978838519684	75.3886645259226	73.8938915652662	71.4412864326804	67.4803795402614	60.7922830651017	48.0739619318447	15.4093285198595	0
76.4537801793544	76.1996199233876	75.3902786629318	73.8953291574831	71.4424941313218	67.4813110595086	60.7929000434511	48.0742144506376	15.4090016322439	0
76.4555831140817	76.201352405851	75.3918890827996	73.896762980287	71.4436981899191	67.4822392907237	60.7935142640115	48.0744647958328	15.408672914962	0
76.4573825419787	76.2030813003022	75.3934957901895	73.8981930423971	71.4448986202862	67.4831642469608	60.7941257391218	48.0747129778223	15.4083423770199	0
76.4591784618588	76.2048066077479	75.395098789793	73.8996193525164	71.4460954341791	67.4840859411889	60.7947344810295	48.0749590069157	15.4080100273501	0
76.4609708726168	76.2065283292571	75.3966980863292	73.9010419193318	71.4472886432964	67.4850043862929	60.7953405018917	48.0752028933413	15.4076758748126	0
76.462759773228	76.2082464659604	75.3982936845446	73.9024607515136	71.4484782592793	67.4859195950744	60.7959438137757	48.0754446472467	15.4073399281949	0
76.4645451627472	76.2099610190494	75.3998855892121	73.9038758577159	71.4496642937122	67.4868315802524	60.7965444286602	48.0756842786999	15.407002196214	0
76.4663270403081	76.211671989776	75.4014738051312	73.905287246576	71.4508467581232	67.4877403544641	60.7971423584358	48.07592179769	15.4066626875158	0
76.4681054051229	76.2133793794518	75.4030583371269	73.9066949267148	71.4520256639839	67.4886459302653	60.7977376149065	48.0761572141282	15.4063214106772	0
76.4698802564809	76.2150831894473	75.4046391900497	73.9080989067363	71.4532010227106	67.4895483201314	60.7983302097899	48.0763905378483	15.4059783742057	0
76.4716515937487	76.2167834211917	75.406216368775	73.9094991952277	71.4543728456638	67.4904475364583	60.7989201547184	48.0766217786081	15.4056335865412	0
76.4734194163685	76.2184800761715	75.4077898782026	73.9108958007593	71.4555411441492	67.4913435915626	60.7995074612402	48.0768509460895	15.4052870560558	0
76.475183723858	76.2201731559305	75.4093597232564	73.9122887318845	71.4567059294177	67.4922364976826	60.8000921408197	48.0770780498999	15.4049387910551	0
76.4769445158097	76.2218626620689	75.4109259088837	73.9136779971395	71.4578672126659	67.493126266979	60.8006742048389	48.0773030995727	15.4045887997789	0
76.4787017918899	76.2235485962428	75.4124884400551	73.9150636050435	71.4590250050362	67.4940129115355	60.8012536645974	48.0775261045679	15.4042370904016	0
76.4804555518382	76.2252309601634	75.414047321764	73.9164455640985	71.4601793176176	67.4948964433595	60.8018305313143	48.0777470742734	15.4038836710332	0
76.4822057954666	76.2269097555965	75.415602559026	73.9178238827893	71.4613301614457	67.4957768743826	60.8024048161279	48.0779660180052	15.40352854972	0
76.483952522659	76.2285849843619	75.4171541568787	73.9191985695831	71.462477547503	67.4966542164616	60.8029765300973	48.0781829450086	15.4031717344448	0
76.4856957333706	76.2302566483327	75.4187021203811	73.92056963293	71.4636214867195	67.4975284813791	60.8035456842028	48.0783978644585	15.4028132331283	0
76.4874354276269	76.2319247494348	75.4202464546136	73.9219370812625	71.4647619899728	67.4983996808437	60.8041122893467	48.0786107854605	15.4024530536293	0
76.4891716055232	76.2335892896462	75.4217871646769	73.9233009229958	71.4658990680887	67.499267826491	60.8046763563542	48.0788217170514	15.4020912037454	0
76.4909042672238	76.2352502709964	75.4233242556924	73.9246611665274	71.4670327318412	67.5001329298844	60.8052378959739	48.0790306682001	15.4017276912138	0
76.4926334129616	76.2369076955659	75.4248577328013	73.9260178202372	71.4681629919531	67.5009950025155	60.805796918879	48.079237647808	15.4013625237118	0
76.494359043037	76.2385615654857	75.4263876011643	73.9273708924875	71.4692898590962	67.5018540558045	60.8063534356674	48.0794426647099	15.4009957088574	0
76.4960811578177	76.2402118829363	75.4279138659613	73.928720391623	71.4704133438917	67.5027101011012	60.806907456863	48.0796457276749	15.4006272542102	0
76.4977997577375	76.2418586501476	75.4294365323911	73.9300663259704	71.4715334569104	67.5035631496856	60.8074589929162	48.0798468454066	15.4002571672717	0
76.4995148432962	76.243501869398	75.430955605671	73.931408703839	71.4726502086734	67.504413212768	60.8080080542043	48.0800460265441	15.3998854554861	0
76.5012264150585	76.2451415430142	75.4324710910362	73.9327475335201	71.4737636096519	67.5052603014904	60.808554651033	48.0802432796624	15.3995121262407	0
76.5029344736535	76.2467776733702	75.4339829937398	73.9340828232871	71.4748736702677	67.5061044269263	60.8090987936361	48.0804386132735	15.3991371868667	0
76.5046390197742	76.2484102628868	75.4354913190522	73.9354145813956	71.4759804008937	67.5069456000819	60.8096404921771	48.0806320358265	15.3987606446398	0
76.5063400541764	76.2500393140314	75.4369960722609	73.9367428160834	71.4770838118542	67.5077838318961	60.8101797567491	48.0808235557086	15.3983825067806	0
76.5080375776787	76.2516648293172	75.4384972586699	73.9380675355703	71.478183913425	67.5086191332418	60.8107165973761	48.0810131812456	15.3980027804552	0
76.5097315911612	76.2532868113026	75.4399948835997	73.939388748058	71.4792807158339	67.5094515149257	60.8112510240132	48.0812009207024	15.3976214727759	0
76.5114220955655	76.2549052625907	75.4414889523869	73.9407064617305	71.4803742292608	67.5102809876893	60.8117830465476	48.081386782284	15.3972385908017	0
76.5131090918933	76.2565201858289	75.4429794703836	73.9420206847535	71.4814644638384	67.5111075622095	60.812312674799	48.0815707741356	15.3968541415386	0
76.5147925812066	76.2581315837082	75.4444664429572	73.9433314252749	71.482551429652	67.511931249099	60.8128399185203	48.0817529043436	15.3964681319406	0
76.5164725646264	76.2597394589626	75.4459498754904	73.9446386914245	71.4836351367403	67.5127520589068	60.8133647873984	48.081933180936	15.39608056891	0
76.5181490433326	76.261343814369	75.4474297733804	73.9459424913139	71.4847155950953	67.5135700021187	60.8138872910546	48.0821116118829	15.3956914592977	0
76.5198220185629	76.2629446527461	75.4489061420388	73.9472428330368	71.485792814663	67.5143850891581	60.8144074390453	48.0822882050973	15.3953008099043	0
76.5214914916126	76.2645419769543	75.4503789868913	73.9485397246688	71.4868668053432	67.5151973303865	60.8149252408626	48.0824629684355	15.3949086274798	0
76.5231574638336	76.266135789895	75.4518483133773	73.9498331742673	71.4879375769903	67.5160067361035	60.815440705935	48.0826359096978	15.394514918725	0
76.5248199366342	76.2677260945101	75.4533141269499	73.9511231898716	71.4890051394133	67.5168133165481	60.8159538436279	48.0828070366289	15.3941196902912	0
76.5264789114781	76.2693128937815	75.4547764330751	73.9524097795029	71.4900695023762	67.5176170818987	60.8164646632442	48.0829763569185	15.3937229487815	0
76.5281343898841	76.2708961907309	75.456235237232	73.9536929511644	71.4911306755981	67.5184180422736	60.8169731740248	48.0831438782019	15.3933247007505	0
76.5297863734255	76.2724759884187	75.4576905449119	73.9549727128409	71.4921886687539	67.5192162077318	60.8174793851494	48.0833096080604	15.3929249527052	0
76.5314348637292	76.2740522899441	75.4591423616188	73.9562490724993	71.4932434914742	67.5200115882733	60.8179833057369	48.0834735540221	15.3925237111056	0
76.5330798624754	76.2756250984441	75.4605906928685	73.9575220380882	71.4942951533457	67.5208041938397	60.8184849448461	48.083635723562	15.3921209823647	0
76.534721371397	76.2771944170935	75.4620355441886	73.9587916175382	71.4953436639118	67.5215940343144	60.818984311476	48.083796124103	15.3917167728496	0
76.5363593922788	76.2787602491041	75.463476921118	73.9600578187616	71.4963890326722	67.5223811195236	60.8194814145665	48.0839547630161	15.3913110888813	0
76.5379939269572	76.2803225977243	75.4649148292068	73.9613206496526	71.4974312690838	67.5231654592362	60.8199762629992	48.0841116476208	15.3909039367358	0
76.5396249773194	76.2818814662387	75.4663492740161	73.9625801180874	71.4984703825609	67.5239470631648	60.8204688655975	48.084266785186	15.3904953226438	0
76.541252545303	76.2834368579675	75.4677802611175	73.9638362319238	71.499506382475	67.5247259409658	60.8209592311275	48.0844201829301	15.3900852527921	0
76.5428766328954	76.2849887762661	75.4692077960931	73.9650889990018	71.5005392781556	67.52550210224	60.8214473682981	48.0845718480218	15.389673733323	0
76.5444972421332	76.2865372245249	75.4706318845348	73.9663384271428	71.5015690788904	67.5262755565331	60.821933285762	48.0847217875801	15.3892607703355	0
76.5461143751016	76.2880822061683	75.4720525320446	73.9675845241506	71.5025957939253	67.5270463133361	60.8224169921161	48.0848700086756	15.3888463698855	0
76.5477280339339	76.2896237246546	75.4734697442341	73.9688272978105	71.5036194324649	67.5278143820858	60.8228984959015	48.08501651833	15.388430537986	0
76.549338220811	76.2911617834756	75.474883526724	73.9700667558899	71.5046400036728	67.528579772165	60.8233778056049	48.0851613235174	15.388013280608	0
76.5509449379608	76.2926963861561	75.4762938851442	73.971302906138	71.5056575166715	67.5293424929035	60.8238549296583	48.0853044311641	15.3875946036803	0
76.5525481876576	76.2942275362532	75.4777008251334	73.972535756286	71.5066719805432	67.530102553578	60.82432987644	48.0854458481495	15.3871745130906	0
76.5541479722217	76.2957552373562	75.479104352339	73.9737653140469	71.5076834043297	67.5308599634126	60.8248026542748	48.0855855813063	15.3867530146851	0
76.5557442940188	76.2972794930862	75.4805044724165	73.9749915871158	71.5086917970328	67.5316147315797	60.8252732714345	48.0857236374213	15.3863301142696	0
76.5573371554595	76.2988003070953	75.4819011910297	73.9762145831696	71.5096971676145	67.5323668671998	60.8257417361386	48.0858600232351	15.3859058176097	0
76.5589265589986	76.3003176830664	75.4832945138502	73.9774343098673	71.5106995249972	67.5331163793423	60.8262080565547	48.0859947454435	15.385480130431	0
76.5605125071349	76.3018316247129	75.4846844465573	73.9786507748497	71.5116988780642	67.5338632770258	60.8266722407987	48.0861278106971	15.3850530584195	0
76.5620950024105	76.3033421357782	75.4860709948376	73.9798639857398	71.5126952356596	67.5346075692187	60.8271342969356	48.0862592256022	15.3846246072223	0
76.56367404741	76.304849220035	75.487454164385	73.9810739501426	71.5136886065889	67.5353492648391	60.8275942329797	48.086388996721	15.3841947824476	0
76.5652496447608	76.3063528812853	75.4888339609003	73.982280675645	71.5146789996191	67.5360883727559	60.8280520568955	48.0865171305722	15.3837635896654	0
76.5668217971317	76.3078531233599	75.4902103900909	73.983484169816	71.5156664234787	67.5368249017888	60.8285077765973	48.0866436336311	15.3833310344074	0
76.5683905072328	76.3093499501177	75.491583457671	73.9846844402067	71.5166508868586	67.5375588607085	60.8289613999506	48.0867685123305	15.382897122168	0
76.5699557778153	76.3108433654458	75.4929531693609	73.9858814943504	71.5176323984115	67.5382902582377	60.829412934772	48.0868917730604	15.3824618584041	0
76.5715176116702	76.3123333732587	75.4943195308871	73.9870753397623	71.5186109667528	67.5390191030509	60.8298623888296	48.0870134221691	15.3820252485358	0
76.5730760116287	76.3138199774979	75.495682547982	73.9882659839399	71.5195866004607	67.5397454037751	60.8303097698438	48.0871334659633	15.3815872979466	0
76.5746309805612	76.3153031821319	75.4970422263834	73.9894534343627	71.5205593080762	67.5404691689901	60.8307550854872	48.0872519107082	15.3811480119836	0
76.5761825213769	76.3167829911555	75.498398571835	73.9906376984926	71.5215290981036	67.5411904072291	60.8311983433855	48.0873687626284	15.3807073959583	0
76.5777306370234	76.3182594085893	75.4997515900855	73.9918187837736	71.5224959790105	67.5419091269784	60.8316395511177	48.0874840279079	15.3802654551464	0
76.5792753304861	76.3197324384799	75.5011012868886	73.9929966976318	71.5234599592284	67.5426253366788	60.8320787162166	48.0875977126907	15.3798221947886	0
76.5808166047879	76.3212020848987	75.5024476680031	73.9941714474759	71.5244210471524	67.5433390447248	60.832515846169	48.0877098230809	15.3793776200907	0
76.5823544629887	76.3226683519423	75.5037907391924	73.9953430406964	71.5253792511421	67.5440502594662	60.8329509484163	48.0878203651435	15.3789317362236	0
76.5838889081848	76.3241312437317	75.5051305062243	73.9965114846665	71.526334579521	67.5447589892075	60.833384030355	48.0879293449042	15.3784845483245	0
76.5854199435085	76.3255907644119	75.5064669748711	73.9976767867416	71.5272870405777	67.5454652422084	60.8338150993367	48.0880367683503	15.3780360614963	0
76.5869475721277	76.3270469181519	75.5078001509088	73.9988389542595	71.5282366425653	67.5461690266848	60.8342441626688	48.0881426414306	15.3775862808084	0
76.5884717972454	76.328499709144	75.5091300401178	73.9999979945403	71.529183393702	67.5468703508084	60.8346712276149	48.0882469700561	15.3771352112971	0
76.5899926220993	76.3299491416035	75.5104566482818	74.0011539148865	71.5301273021713	67.5475692227075	60.8350963013951	48.0883497601002	15.3766828579654	0
76.5915100499615	76.3313952197686	75.5117799811886	74.0023067225833	71.5310683761222	67.548265650467	60.8355193911862	48.088451017399	15.376229225784	0
76.5930240841375	76.3328379478998	75.5131000446288	74.0034564248979	71.5320066236693	67.5489596421291	60.8359405041224	48.0885507477515	15.375774319691	0
76.5945347279665	76.3342773302796	75.5144168443965	74.0046030290806	71.5329420528934	67.5496512056935	60.8363596472955	48.0886489569205	15.3753181445924	0
76.5960419848205	76.3357133712122	75.5157303862889	74.0057465423638	71.5338746718412	67.5503403491176	60.8367768277553	48.0887456506323	15.3748607053625	0
76.5975458581039	76.3371460750231	75.5170406761058	74.0068869719625	71.5348044885257	67.551027080317	60.8371920525099	48.0888408345771	15.3744020068443	0
76.5990463512532	76.3385754460589	75.51834771965	74.0080243250746	71.5357315109268	67.5517114071657	60.837605328526	48.0889345144099	15.3739420538494	0
76.6005434677367	76.3400014886868	75.5196515227266	74.0091586088802	71.5366557469908	67.5523933374966	60.8380166627295	48.0890266957502	15.3734808511584	0
76.6020372110538	76.3414242072946	75.5209520911431	74.0102898305424	71.5375772046313	67.5530728791017	60.8384260620058	48.0891173841824	15.3730184035216	0
76.6035275847346	76.3428436062897	75.5222494307092	74.0114179972068	71.538495891729	67.5537500397323	60.8388335331998	48.0892065852564	15.3725547156587	0
76.6050145923398	76.3442596900997	75.5235435472366	74.0125431160018	71.5394118161319	67.5544248270996	60.8392390831166	48.0892943044877	15.3720897922595	0
76.60649823746	76.3456724631713	75.524834446539	74.0136651940386	71.5403249856558	67.5550972488748	60.8396427185219	48.0893805473579	15.3716236379838	0
76.6079785237153	76.3470819299703	75.5261221344317	74.0147842384111	71.5412354080842	67.5557673126896	60.840044446142	48.0894653193147	15.3711562574621	0
76.6094554547551	76.3484880949813	75.5274066167316	74.015900256196	71.5421430911688	67.5564350261362	60.8404442726643	48.0895486257723	15.3706876552956	0
76.6109290342577	76.3498909627075	75.528687899257	74.0170132544531	71.5430480426292	67.5571003967679	60.8408422047377	48.0896304721119	15.3702178360564	0
76.6123992659294	76.35129053767	75.5299659878273	74.0181232402246	71.5439502701537	67.5577634320993	60.8412382489729	48.0897108636818	15.369746804288	0
76.613866153505	76.352686824408	75.5312408882633	74.0192302205362	71.5448497813991	67.5584241396066	60.8416324119425	48.0897898057977	15.3692745645053	0
76.6153297007464	76.3540798274781	75.5325126063866	74.0203342023961	71.5457465839912	67.5590825267278	60.8420247001819	48.0898673037431	15.3688011211951	0
76.6167899114432	76.3554695514541	75.5337811480195	74.0214351927958	71.5466406855246	67.5597386008632	60.8424151201888	48.0899433627694	15.3683264788162	0
76.6182467894115	76.3568560009271	75.5350465189852	74.0225331987096	71.5475320935631	67.5603923693755	60.8428036784242	48.0900179880965	15.3678506417996	0
76.6197003384941	76.3582391805043	75.5363087251073	74.0236282270951	71.5484208156402	67.5610438395902	60.8431903813122	48.0900911849125	15.3673736145491	0
76.6211505625598	76.3596190948098	75.5375677722097	74.0247202848928	71.5493068592586	67.5616930187958	60.843575235241	48.0901629583747	15.3668954014411	0
76.6225974655031	76.3609957484836	75.5388236661168	74.0258093790263	71.550190231891	67.5623399142441	60.8439582465622	48.0902333136094	15.3664160068249	0
76.6240410512439	76.3623691461815	75.5400764126528	74.0268955164026	71.5510709409802	67.5629845331507	60.8443394215921	48.0903022557122	15.3659354350233	0
76.6254813237272	76.3637392925748	75.5413260176421	74.0279787039118	71.5519489939388	67.5636268826948	60.8447187666113	48.0903697897484	15.3654536903325	0
76.6269182869225	76.3651061923501	75.5425724869088	74.0290589484271	71.5528243981501	67.5642669700201	60.8450962878654	48.0904359207532	15.3649707770224	0
76.6283519448236	76.366469850209	75.5438158262769	74.0301362568052	71.5536971609676	67.5649048022345	60.8454719915651	48.0905006537321	15.364486699337	0
76.6297823014482	76.3678302708677	75.5450560415698	74.031210635886	71.5545672897158	67.5655403864106	60.8458458838865	48.0905639936607	15.3640014614943	0
76.6312093608378	76.3691874590571	75.5462931386104	74.0322820924928	71.55543479169	67.5661737295861	60.8462179709714	48.0906259454857	15.363515067687	0
76.6326331270567	76.3705414195219	75.5475271232208	74.0333506334322	71.5562996741564	67.5668048387639	60.8465882589277	48.0906865141245	15.3630275220822	0
76.6340536041926	76.3718921570211	75.5487580012227	74.0344162654944	71.5571619443527	67.5674337209123	60.8469567538294	48.0907457044657	15.3625388288219	0
76.6354707963553	76.3732396763269	75.5499857784365	74.0354789954528	71.5580216094878	67.5680603829654	60.8473234617174	48.0908035213694	15.3620489920234	0
76.6368847076771	76.3745839822254	75.5512104606815	74.0365388300646	71.5588786767424	67.5686848318236	60.847688388599	48.0908599696673	15.361558015779	0
76.6382953423119	76.3759250795154	75.5524320537763	74.0375957760703	71.5597331532688	67.569307074353	60.8480515404489	48.0909150541631	15.3610659041568	0
76.6397027044355	76.3772629730088	75.5536505635377	74.0386498401942	71.5605850461914	67.5699271173869	60.848412923209	48.0909687796326	15.3605726612006	0
76.6411067982445	76.3785976675301	75.5548659957814	74.0397010291439	71.5614343626066	67.5705449677248	60.8487725427891	48.091021150824	15.36007829093	0
76.6425076279567	76.3799291679161	75.5560783563215	74.0407493496111	71.5622811095831	67.5711606321335	60.8491304050667	48.0910721724583	15.3595827973408	0
76.6439051978104	76.3812574790159	75.5572876509705	74.0417948082707	71.5631252941621	67.5717741173471	60.8494865158873	48.0911218492291	15.3590861844054	0
76.645299512064	76.3825826056903	75.558493885539	74.0428374117818	71.5639669233575	67.5723854300671	60.8498408810653	48.0911701858033	15.3585884560723	0
76.6466905749958	76.3839045528118	75.559697065836	74.0438771667868	71.5648060041559	67.5729945769628	60.8501935063833	48.091217186821	15.3580896162673	0
76.648078390904	76.3852233252644	75.5608971976684	74.0449140799123	71.5656425435167	67.5736015646716	60.8505443975932	48.0912628568959	15.3575896688928	0
76.6494629641058	76.3865389279432	75.562094286841	74.0459481577686	71.5664765483728	67.574206399799	60.8508935604157	48.0913072006155	15.3570886178285	0
76.6508442989376	76.3878513657542	75.5632883391564	74.0469794069498	71.56730802563	67.5748090889189	60.8512410005414	48.0913502225413	15.3565864669314	0
76.6522223997543	76.3891606436143	75.5644793604151	74.0480078340341	71.5681369821677	67.5754096385741	60.8515867236302	48.0913919272089	15.3560832200363	0
76.6535972709292	76.3904667664507	75.5656673564151	74.0490334455834	71.5689634248391	67.5760080552763	60.8519307353121	48.0914323191283	15.3555788809554	0
76.6549689168539	76.3917697392009	75.5668523329517	74.0500562481438	71.5697873604708	67.5766043455062	60.8522730411871	48.0914714027845	15.3550734534791	0
76.6563373419375	76.3930695668124	75.568034295818	74.0510762482455	71.5706087958635	67.577198515714	60.8526136468259	48.0915091826369	15.3545669413759	0
76.6577025506068	76.3943662542426	75.5692132508041	74.0520934524026	71.5714277377921	67.5777905723195	60.8529525577696	48.0915456631203	15.3540593483923	0
76.6590645473057	76.3956598064583	75.5703892036975	74.0531078671135	71.5722441930055	67.5783805217125	60.8532897795302	48.0915808486444	15.3535506782538	0
76.6604233364951	76.396950228436	75.5715621602826	74.0541194988604	71.5730581682271	67.5789683702524	60.8536253175909	48.0916147435948	15.3530409346643	0
76.6617789226524	76.3982375251611	75.5727321263411	74.0551283541102	71.5738696701548	67.5795541242694	60.8539591774062	48.0916473523326	15.3525301213065	0
76.6631313102714	76.3995217016279	75.5738991076514	74.0561344393136	71.5746787054614	67.5801377900639	60.854291364402	48.0916786791946	15.3520182418423	0
76.664480503862	76.4008027628397	75.5750631099887	74.0571377609059	71.5754852807942	67.580719373907	60.8546218839762	48.0917087284939	15.3515052999127	0
76.6658265079498	76.4020807138081	75.5762241391252	74.0581383253064	71.5762894027756	67.5812988820408	60.8549507414987	48.0917375045198	15.3509912991382	0
76.667169327076	76.403355559553	75.5773822008294	74.059136138919	71.5770910780034	67.5818763206784	60.8552779423115	48.0917650115381	15.3504762431188	0
76.668508965797	76.4046273051027	75.5785373008667	74.0601312081318	71.5778903130504	67.5824516960046	60.8556034917291	48.0917912537913	15.3499601354342	0
76.6698454286843	76.405895955493	75.5796894449986	74.0611235393176	71.5786871144648	67.5830250141751	60.8559273950388	48.0918162354987	15.349442979644	0
76.6711787203238	76.4071615157676	75.5808386389832	74.0621131388334	71.5794814887706	67.5835962813181	60.8562496575005	48.0918399608566	15.3489247792881	0
76.6725088453162	76.408423990978	75.581984888575	74.0631000130208	71.5802734424674	67.5841655035331	60.8565702843476	48.0918624340386	15.3484055378862	0
76.673835808276	76.4096833861826	75.5831281995244	74.0640841682059	71.5810629820306	67.5847326868922	60.8568892807863	48.0918836591957	15.3478852589389	0
76.6751596138319	76.410939706447	75.5842685775782	74.0650656106995	71.5818501139118	67.5852978374395	60.8572066519967	48.0919036404565	15.347363945927	0
76.6764802666263	76.412192956844	75.585406028479	74.0660443467969	71.5826348445385	67.585860961192	60.8575224031326	48.0919223819273	15.3468416023122	0
76.6777977713147	76.4134431424528	75.5865405579656	74.0670203827782	71.5834171803147	67.5864220641391	60.8578365393214	48.0919398876927	15.3463182315369	0
76.679112132566	76.4146902683594	75.5876721717724	74.0679937249081	71.5841971276207	67.5869811522434	60.8581490656651	48.0919561618149	15.3457938370248	0
76.680423355062	76.415934339656	75.5888008756299	74.068964379436	71.5849746928134	67.5875382314405	60.8584599872395	48.0919712083349	15.3452684221807	0
76.6817314434971	76.4171753614412	75.5899266752642	74.0699323525962	71.5857498822264	67.5880933076394	60.8587693090954	48.091985031272	15.3447419903907	0
76.6830364025781	76.4184133388195	75.5910495763969	74.0708976506077	71.5865227021701	67.5886463867225	60.859077036258	48.0919976346241	15.3442145450224	0
76.6843382370241	76.4196482769011	75.5921695847452	74.0718602796745	71.5872931589318	67.5891974745459	60.8593831737277	48.0920090223681	15.3436860894251	0
76.6856369515658	76.420880180802	75.5932867060221	74.0728202459854	71.5880612587762	67.5897465769398	60.8596877264796	48.0920191984597	15.34315662693	0
76.6869325509461	76.4221090556436	75.5944009459357	74.0737775557142	71.5888270079448	67.5902936997082	60.8599906994645	48.092028166834	15.34262616085	0
76.6882250399189	76.4233349065527	75.5955123101894	74.0747322150195	71.5895904126567	67.5908388486295	60.8602920976085	48.0920359314053	15.3420946944804	0
76.6895144232496	76.4245577386611	75.5966208044821	74.0756842300452	71.5903514791087	67.5913820294564	60.8605919258134	48.0920424960674	15.3415622310986	0
76.6908007057146	76.4257775571056	75.5977264345078	74.07663360692	71.5911102134747	67.5919232479164	60.8608901889568	48.0920478646939	15.3410287739644	0
76.6920838921009	76.4269943670279	75.5988292059556	74.0775803517578	71.5918666219068	67.5924625097115	60.8611868918926	48.0920520411382	15.3404943263201	0
76.6933639872063	76.4282081735741	75.5999291245097	74.0785244706576	71.5926207105347	67.592999820519	60.8614820394505	48.0920550292335	15.3399588913907	0
76.6946409958386	76.4294189818949	75.6010261958493	74.0794659697037	71.5933724854664	67.5935351859912	60.8617756364371	48.0920568327934	15.3394224723842	0
76.695914922816	76.4306267971454	75.6021204256484	74.0804048549654	71.5941219527877	67.5940686117555	60.8620676876351	48.0920574556117	15.3388850724913	0
76.6971857729664	76.4318316244845	75.6032118195761	74.0813411324974	71.5948691185628	67.5946001034151	60.8623581978043	48.0920569014625	15.3383466948859	0
76.6984535511276	76.4330334690755	75.6043003832961	74.0822748083396	71.5956139888343	67.5951296665486	60.8626471716814	48.0920551741009	15.3378073427251	0
76.6997182621465	76.4342323360851	75.6053861224669	74.0832058885172	71.5963565696233	67.5956573067106	60.8629346139801	48.0920522772625	15.3372670191494	0
76.7009799108796	76.4354282306839	75.6064690427416	74.0841343790409	71.5970968669295	67.5961830294315	60.8632205293914	48.0920482146637	15.3367257272828	0
76.7022385021922	76.4366211580461	75.6075491497679	74.0850602859068	71.5978348867312	67.5967068402181	60.8635049225838	48.0920429900024	15.336183470233	0
76.7034940409585	76.4378111233489	75.6086264491882	74.0859836150961	71.5985706349858	67.5972287445532	60.8637877982035	48.0920366069572	15.3356402510912	0
76.7047465320614	76.4389981317731	75.6097009466393	74.086904372576	71.5993041176295	67.5977487478963	60.8640691608743	48.0920290691885	15.3350960729327	0
76.705995980392	76.4401821885022	75.6107726477523	74.0878225642988	71.6000353405776	67.5982668556835	60.8643490151982	48.0920203803379	15.3345509388169	0
76.7072423908499	76.4413632987228	75.6118415581528	74.0887381962025	71.6007643097249	67.5987830733277	60.864627365755	48.0920105440288	15.3340048517871	0
76.7084857683425	76.4425414676243	75.6129076834606	74.0896512742108	71.601491030945	67.5992974062186	60.8649042171032	48.0919995638665	15.333457814871	0
76.7097261177852	76.4437167003987	75.6139710292899	74.0905618042328	71.6022155100914	67.5998098597231	60.8651795737793	48.091987443438	15.3329098310807	0
76.7109634441008	76.4448890022402	75.615031601249	74.0914697921634	71.6029377529969	67.6003204391855	60.8654534402987	48.0919741863124	15.3323609034128	0
76.7121977522197	76.4460583783457	75.6160894049402	74.0923752438833	71.6036577654741	67.6008291499274	60.8657258211555	48.0919597960413	15.3318110348486	0
76.7134290470795	76.447224833914	75.6171444459601	74.0932781652588	71.6043755533154	67.6013359972479	60.8659967208227	48.0919442761582	15.3312602283539	0
76.7146573336248	76.4483883741463	75.6181967298992	74.094178562142	71.605091122293	67.601840986424	60.8662661437523	48.0919276301796	15.3307084868797	0
76.7158826168073	76.4495490042453	75.619246262342	74.0950764403708	71.6058044781591	67.6023441227103	60.8665340943757	48.0919098616041	15.3301558133619	0
76.717104901585	76.4507067294158	75.6202930488669	74.0959718057691	71.6065156266461	67.6028454113397	60.8668005771036	48.0918909739135	15.3296022107214	0
76.7183241929226	76.4518615548641	75.6213370950463	74.0968646641464	71.6072245734665	67.6033448575232	60.8670655963261	48.0918709705721	15.3290476818644	0
76.7195404957912	76.4530134857981	75.6223784064463	74.0977550212986	71.6079313243133	67.6038424664499	60.8673291564132	48.0918498550276	15.3284922296825	0
76.7207538151678	76.4541625274268	75.6234169886266	74.098642883007	71.6086358848598	67.6043382432877	60.8675912617145	48.0918276307105	15.3279358570527	0
76.7219641560357	76.455308684961	75.624452847141	74.0995282550394	71.6093382607598	67.6048321931828	60.8678519165598	48.0918043010347	15.3273785668375	0
76.7231715233836	76.4564519636122	75.6254859875366	74.1004111431494	71.610038457648	67.6053243212603	60.8681111252589	48.0917798693977	15.3268203618853	0
76.724375922206	76.4575923685929	75.6265164153543	74.1012915530766	71.6107364811397	67.6058146326241	60.8683688921019	48.0917543391801	15.32626124503	0
76.725577357503	76.4587299051168	75.6275441361287	74.102169490547	71.6114323368309	67.6063031323573	60.8686252213593	48.0917277137466	15.3257012190916	0
76.7267758342796	76.459864578398	75.6285691553877	74.1030449612725	71.6121260302988	67.606789825522	60.868880117282	48.0916999964453	15.3251402868762	0
76.7279713575462	76.4609963936514	75.6295914786527	74.1039179709513	71.6128175671016	67.6072747171595	60.8691335841019	48.0916711906085	15.3245784511757	0
76.7291639323179	76.4621253560925	75.6306111114387	74.1047885252678	71.6135069527786	67.6077578122908	60.8693856260314	48.0916412995523	15.3240157147685	0
76.7303535636149	76.463251470937	75.6316280592539	74.1056566298927	71.6141941928505	67.6082391159163	60.8696362472642	48.091610326577	15.3234520804191	0
76.7315402564616	76.4643747434011	75.6326423276001	74.1065222904829	71.6148792928193	67.6087186330161	60.8698854519748	48.0915782749671	15.3228875508788	0
76.732724015887	76.4654951787009	75.6336539219721	74.1073855126818	71.6155622581684	67.6091963685502	60.870133244319	48.0915451479917	15.322322128885	0
76.7339048469247	76.4666127820527	75.6346628478582	74.108246302119	71.6162430943628	67.6096723274587	60.8703796284342	48.0915109489041	15.3217558171621	0
76.7350827546118	76.4677275586727	75.6356691107398	74.1091046644106	71.6169218068492	67.6101465146614	60.870624608439	48.0914756809423	15.321188618421	0
76.73625774399	76.468839513777	75.6366727160915	74.1099606051593	71.6175984010561	67.6106189350587	60.8708681884338	48.0914393473292	15.3206205353596	0
76.7374298201044	76.4699486525813	75.6376736693812	74.1108141299539	71.6182728823939	67.6110895935312	60.8711103725008	48.0914019512721	15.3200515706625	0
76.7385989880038	76.4710549803009	75.6386719760696	74.1116652443701	71.6189452562547	67.6115584949401	60.8713511647039	48.0913634959638	15.3194817270017	0
76.7397652527408	76.4721585021507	75.6396676416107	74.11251395397	71.6196155280128	67.612025644127	60.8715905690892	48.0913239845816	15.3189110070361	0
76.7409286193711	76.4732592233448	75.6406606714514	74.1133602643021	71.6202837030249	67.6124910459143	60.8718285896848	48.0912834202885	15.3183394134118	0
76.7420890929536	76.4743571490968	75.6416510710318	74.114204180902	71.6209497866294	67.6129547051055	60.8720652305013	48.0912418062323	15.3177669487624	0
76.7432466785504	76.4754522846193	75.6426388457846	74.1150457092915	71.6216137841476	67.6134166264848	60.8723004955316	48.0911991455464	15.3171936157088	0
76.7444013812265	76.476544635124	75.6436240011357	74.1158848549792	71.6222757008827	67.6138768148175	60.8725343887509	48.0911554413497	15.3166194168594	0
76.7455532060496	76.4776342058216	75.6446065425038	74.1167216234607	71.6229355421209	67.6143352748503	60.8727669141173	48.0911106967468	15.3160443548104	0
76.7467021580901	76.4787210019217	75.6455864753005	74.1175560202181	71.6235933131306	67.6147920113112	60.8729980755716	48.0910649148276	15.3154684321454	0
76.747848242421	76.4798050286326	75.6465638049299	74.1183880507204	71.6242490191632	67.6152470289094	60.8732278770375	48.0910180986683	15.3148916514361	0
76.7489914641174	76.4808862911613	75.6475385367894	74.1192177204233	71.6249026654527	67.6157003323362	60.8734563224216	48.0909702513306	15.3143140152418	0
76.7501318282568	76.4819647947134	75.6485106762686	74.1200450347697	71.6255542572161	67.616151926264	60.8736834156137	48.0909213758625	15.3137355261101	0
76.7512693399189	76.4830405444928	75.6494802287502	74.120869999189	71.6262037996531	67.6166018153475	60.8739091604869	48.0908714752979	15.3131561865764	0
76.7524040041851	76.4841135457021	75.6504471996094	74.1216926190979	71.6268512979468	67.6170500042229	60.8741335608976	48.090820552657	15.3125759991643	0
76.7535358261387	76.4851838035419	75.6514115942141	74.1225128998998	71.6274967572633	67.6174964975089	60.8743566206855	48.0907686109464	15.3119949663858	0
76.7546648108649	76.4862513232111	75.6523734179247	74.1233308469854	71.6281401827519	67.6179412998059	60.8745783436742	48.0907156531589	15.311413090741	0
76.7557909634502	76.4873161099067	75.6533326760945	74.1241464657322	71.6287815795451	67.6183844156968	60.8747987336708	48.0906616822739	15.3108303747185	0
76.7569142889827	76.4883781688237	75.6542893740689	74.1249597615048	71.629420952759	67.6188258497469	60.8750177944661	48.0906067012576	15.3102468207955	0
76.7580347925516	76.489437505155	75.6552435171861	74.1257707396551	71.6300583074931	67.6192656065039	60.875235529835	48.0905507130625	15.3096624314376	0
76.7591524792475	76.4904941240914	75.6561951107769	74.126579405522	71.6306936488305	67.6197036904981	60.8754519435365	48.0904937206282	15.3090772090993	0
76.7602673541621	76.4915480308214	75.6571441601642	74.1273857644317	71.6313269818377	67.6201401062425	60.8756670393134	48.0904357268811	15.3084911562235	0
76.7613794223878	76.4925992305311	75.6580906706637	74.1281898216974	71.6319583115653	67.6205748582329	60.8758808208931	48.0903767347345	15.3079042752423	0
76.762488689018	76.4936477284043	75.6590346475833	74.1289915826199	71.6325876430475	67.621007950948	60.8760932919872	48.0903167470889	15.3073165685764	0
76.7635951591466	76.4946935296221	75.6599760962233	74.1297910524869	71.6332149813024	67.6214393888496	60.8763044562916	48.0902557668319	15.3067280386357	0
76.7646988378684	76.4957366393633	75.6609150218765	74.1305882365737	71.633840331332	67.6218691763826	60.876514317487	48.0901937968384	15.3061386878191	0
76.7657997302785	76.4967770628037	75.6618514298278	74.1313831401429	71.6344636981227	67.6222973179749	60.8767228792387	48.0901308399705	15.3055485185146	0
76.7668978414721	76.4978148051165	75.6627853253547	74.1321757684444	71.6350850866445	67.6227238180382	60.8769301451967	48.0900668990778	15.3049575330994	0
76.7679931765451	76.4988498714722	75.6637167137267	74.1329661267156	71.6357045018521	67.623148680967	60.8771361189959	48.0900019769976	15.3043657339402	0
76.7690857405932	76.4998822670381	75.6646456002056	74.1337542201814	71.6363219486842	67.62357191114	60.8773408042562	48.0899360765546	15.3037731233929	0
76.7701755387122	76.5009119969786	75.6655719900456	74.134540054054	71.636937432064	67.623993512919	60.8775442045825	48.0898692005612	15.3031797038028	0
76.7712625759977	76.5019390664553	75.6664958884931	74.1353236335334	71.637550956899	67.6244134906498	60.8777463235649	48.0898013518176	15.3025854775049	0
76.7723468575452	76.5029634806262	75.6674173007864	74.1361049638069	71.6381625280813	67.624831848662	60.8779471647788	48.089732533112	15.3019904468238	0
76.77342838845	76.5039852446463	75.6683362321563	74.1368840500496	71.6387721504877	67.625248591269	60.8781467317849	48.0896627472204	15.3013946140735	0
76.7745071738068	76.5050043636675	75.6692526878255	74.137660897424	71.6393798289796	67.6256637227683	60.8783450281295	48.0895919969069	15.3007979815582	0
76.7755832187097	76.5060208428379	75.6701666730089	74.1384355110805	71.6399855684031	67.6260772474416	60.8785420573442	48.0895202849236	15.3002005515715	0
76.7766565282523	76.5070346873025	75.6710781929137	74.139207896157	71.6405893735891	67.6264891695547	60.8787378229466	48.089447614011	15.299602326397	0
76.7777271075275	76.5080459022027	75.6719872527387	74.1399780577791	71.6411912493534	67.6268994933578	60.8789323284398	48.0893739868977	15.2990033083086	0
76.7787949616272	76.5090544926762	75.6728938576753	74.1407460010604	71.641791200497	67.6273082230854	60.8791255773126	48.0892994063007	15.2984034995698	0
76.7798600956426	76.5100604638573	75.6737980129066	74.1415117311021	71.6423892318056	67.6277153629565	60.8793175730402	48.0892238749255	15.2978029024344	0
76.7809225146637	76.5110638208762	75.6746997236077	74.1422752529932	71.6429853480502	67.6281209171748	60.8795083190835	48.0891473954661	15.2972015191463	0
76.7819822237793	76.5120645688597	75.6755989949459	74.1430365718105	71.643579553987	67.6285248899285	60.8796978188894	48.0890699706051	15.2965993519398	0
76.783039228077	76.5130627129304	75.6764958320803	74.1437956926189	71.6441718543574	67.6289272853908	60.8798860758913	48.0889916030136	15.2959964030394	0
76.7840935326434	76.5140582582073	75.677390240162	74.1445526204711	71.6447622538882	67.6293281077196	60.8800730935088	48.0889122953518	15.2953926746599	0
76.7851451425631	76.5150512098051	75.6782822243342	74.1453073604077	71.6453507572915	67.6297273610577	60.8802588751478	48.0888320502685	15.2947881690067	0
76.7861940629197	76.5160415728347	75.6791717897319	74.1460599174573	71.6459373692648	67.630125049533	60.8804434242007	48.0887508704012	15.2941828882756	0
76.7872402987948	76.5170293524028	75.6800589414819	74.1468102966366	71.6465220944914	67.6305211772587	60.8806267440465	48.0886687583769	15.2935768346531	0
76.7882838552687	76.5180145536117	75.680943684703	74.1475585029502	71.64710493764	67.6309157483328	60.8808088380509	48.0885857168112	15.2929700103162	0
76.7893247374195	76.5189971815599	75.6818260245059	74.1483045413909	71.647685903365	67.631308766839	60.8809897095661	48.088501748309	15.2923624174326	0
76.7903629503237	76.5199772413413	75.6827059659931	74.1490484169394	71.6482649963067	67.6317002368461	60.8811693619315	48.0884168554644	15.291754058161	0
76.7913984990557	76.5209547380453	75.683583514259	74.1497901345649	71.6488422210909	67.6320901624086	60.881347798473	48.0883310408608	15.2911449346507	0
76.792431388688	76.5219296767573	75.6844586743898	74.1505296992244	71.6494175823296	67.6324785475664	60.8815250225037	48.0882443070708	15.290535049042	0
76.7934616242907	76.5229020625578	75.6853314514635	74.1512671158634	71.6499910846206	67.6328653963451	60.8817010373237	48.0881566566566	15.2899244034661	0
76.794489210932	76.5238719005231	75.6862018505499	74.1520023894153	71.6505627325476	67.6332507127558	60.8818758462204	48.0880680921697	15.2893130000452	0
76.7955141536775	76.5248391957247	75.6870698767106	74.1527355248021	71.6511325306805	67.6336345007957	60.8820494524681	48.0879786161514	15.2887008408927	0
76.7965364575905	76.5258039532295	75.687935534999	74.1534665269338	71.6517004835755	67.6340167644478	60.8822218593288	48.0878882311323	15.2880879281131	0
76.7975561277319	76.5267661780996	75.6887988304601	74.154195400709	71.6522665957746	67.634397507681	60.8823930700515	48.0877969396329	15.287474263802	0
76.7985731691601	76.5277258753925	75.6896597681309	74.1549221510144	71.6528308718064	67.6347767344501	60.8825630878731	48.0877047441635	15.2868598500463	0
76.7995875869306	76.5286830501609	75.69051835304	74.1556467827253	71.6533933161858	67.6351544486964	60.8827319160176	48.0876116472241	15.2862446889244	0
76.8005993860965	76.5296377074524	75.6913745902075	74.1563693007053	71.6539539334138	67.635530654347	60.882899557697	48.0875176513046	15.2856287825058	0
76.8016085717079	76.5305898523098	75.6922284846457	74.1570897098064	71.6545127279784	67.6359053553155	60.8830660161107	48.0874227588849	15.2850121328516	0
76.8026151488121	76.531539489771	75.6930800413581	74.1578080148691	71.6550697043535	67.6362785555018	60.8832312944461	48.0873269724351	15.2843947420143	0
76.8036191224535	76.5324866248689	75.6939292653402	74.1585242207225	71.655624867	67.6366502587922	60.8833953958784	48.087230294415	15.2837766120382	0
76.8046204976734	76.5334312626312	75.694776161579	74.1592383321842	71.6561782203654	67.6370204690596	60.8835583235707	48.0871327272748	15.2831577449588	0
76.80561927951	76.5343734080804	75.6956207350533	74.1599503540604	71.6567297688837	67.6373891901634	60.883720080674	48.087034273455	15.2825381428036	0
76.8066154729986	76.535313066234	75.6964629907334	74.1606602911457	71.6572795169758	67.6377564259496	60.8838806703276	48.0869349353861	15.2819178075917	0
76.8076090831708	76.5362502421042	75.6973029335814	74.1613681482235	71.6578274690496	67.6381221802511	60.8840400956588	48.0868347154893	15.2812967413339	0
76.8086001150553	76.537184940698	75.6981405685509	74.1620739300659	71.6583736294994	67.6384864568875	60.8841983597833	48.086733616176	15.2806749460329	0
76.8095885736771	76.538117167017	75.6989759005872	74.1627776414335	71.6589180027069	67.6388492596652	60.8843554658047	48.0866316398479	15.2800524236833	0
76.8105744640582	76.5390469260575	75.6998089346272	74.1634792870758	71.6594605930407	67.6392105923778	60.8845114168154	48.0865287888977	15.2794291762716	0
76.8115577912165	76.5399742228103	75.7006396755994	74.164178871731	71.6600014048562	67.6395704588056	60.8846662158961	48.0864250657082	15.2788052057763	0
76.8125385601668	76.5408990622608	75.7014681284238	74.1648764001259	71.6605404424964	67.6399288627162	60.8848198661159	48.0863204726531	15.2781805141679	0
76.81351677592	76.5418214493888	75.7022942980121	74.1655718769764	71.661077710291	67.6402858078644	60.8849723705325	48.0862150120968	15.277555103409	0
76.8144924434834	76.5427413891689	75.7031181892677	74.166265306987	71.6616132125571	67.6406412979921	60.8851237321925	48.0861086863945	15.2769289754544	0
76.8154655678604	76.5436588865697	75.7039398070852	74.1669566948511	71.6621469535993	67.6409953368285	60.8852739541308	48.086001497892	15.2763021322511	0
76.8164361540506	76.5445739465543	75.7047591563511	74.1676460452511	71.6626789377092	67.6413479280904	60.8854230393715	48.0858934489264	15.2756745757382	0
76.8174042070499	76.5454865740803	75.7055762419433	74.1683333628582	71.6632091691661	67.6416990754818	60.8855709909273	48.0857845418253	15.2750463078473	0
76.8183697318498	76.5463967740993	75.7063910687314	74.1690186523327	71.6637376522366	67.6420487826943	60.8857178117998	48.0856747789076	15.2744173305021	0
76.8193327334382	76.5473045515575	75.7072036415763	74.1697019183236	71.6642643911747	67.642397053407	60.8858635049797	48.0855641624831	15.273787645619	0
76.8202932167986	76.548209911395	75.7080139653306	74.1703831654692	71.6647893902223	67.6427438912869	60.8860080734468	48.0854526948528	15.2731572551065	0
76.8212511869105	76.5491128585462	75.7088220448383	74.1710623983967	71.6653126536086	67.6430892999884	60.8861515201698	48.0853403783088	15.2725261608659	0
76.8222066487492	76.5500133979396	75.7096278849353	74.1717396217223	71.6658341855507	67.6434332831538	60.8862938481068	48.0852272151346	15.2718943647909	0
76.8231596072856	76.5509115344978	75.7104314904485	74.1724148400515	71.6663539902532	67.6437758444134	60.8864350602051	48.0851132076047	15.2712618687676	0
76.8241100674863	76.5518072731375	75.7112328661967	74.1730880579786	71.6668720719089	67.6441169873851	60.8865751594012	48.0849983579852	15.2706286746752	0
76.8250580343137	76.5527006187693	75.7120320169899	74.1737592800875	71.6673884346979	67.644456715675	60.886714148621	48.0848826685333	15.2699947843851	0
76.8260035127255	76.553591576298	75.7128289476299	74.1744285109508	71.6679030827885	67.6447950328772	60.8868520307799	48.084766141498	15.2693601997617	0
76.826946507675	76.554480150622	75.7136236629098	74.1750957551306	71.668416020337	67.645131942574	60.8869888087829	48.0846487791194	15.268724922662	0
76.8278870241111	76.555366346634	75.7144161676143	74.1757610171781	71.6689272514876	67.6454674483355	60.8871244855242	48.0845305836295	15.2680889549362	0
76.8288250669778	76.5562501692203	75.7152064665196	74.1764243016338	71.6694367803725	67.6458015537205	60.887259063888	48.0844115572516	15.2674522984267	0
76.8297606412146	76.5571316232611	75.7159945643932	74.1770856130276	71.6699446111119	67.6461342622758	60.887392546748	48.084291702201	15.2668149549695	0
76.8306937517564	76.5580107136304	75.7167804659943	74.1777449558785	71.6704507478145	67.6464655775365	60.8875249369677	48.0841710206843	15.2661769263932	0
76.8316244035331	76.5588874451961	75.7175641760736	74.178402334695	71.6709551945768	67.6467955030264	60.8876562374002	48.0840495149001	15.2655382145193	0
76.83255260147	76.5597618228198	75.718345699373	74.1790577539749	71.6714579554839	67.6471240422575	60.8877864508888	48.0839271870388	15.2648988211625	0
76.8334783504873	76.5606338513565	75.7191250406262	74.1797112182054	71.671959034609	67.6474511987304	60.8879155802665	48.0838040392825	15.2642587481307	0
76.8344016555004	76.5615035356554	75.7199022045581	74.1803627318633	71.6724584360136	67.6477769759344	60.8880436283563	48.0836800738053	15.2636179972247	0
76.8353225214199	76.5623708805589	75.7206771958853	74.1810122994144	71.6729561637477	67.6481013773474	60.8881705979711	48.0835552927733	15.2629765702386	0
76.8362409531511	76.5632358909033	75.7214500193157	74.1816599253146	71.6734522218498	67.6484244064359	60.8882964919142	48.0834296983446	15.2623344689597	0
76.8371569555944	76.5640985715183	75.7222206795487	74.1823056140088	71.6739466143467	67.6487460666554	60.8884213129789	48.0833032926691	15.2616916951685	0
76.8380705336451	76.5649589272273	75.7229891812753	74.1829493699316	71.6744393452541	67.6490663614499	60.8885450639485	48.0831760778891	15.2610482506387	0
76.8389816921932	76.5658169628471	75.7237555291777	74.1835911975073	71.6749304185758	67.6493852942525	60.8886677475969	48.083048056139	15.2604041371377	0
76.8398904361237	76.566672683188	75.7245197279298	74.1842311011495	71.6754198383047	67.6497028684853	60.8887893666881	48.0829192295451	15.2597593564258	0
76.8407967703163	76.567526093054	75.7252817821968	74.1848690852618	71.6759076084221	67.6500190875593	60.8889099239765	48.0827896002263	15.2591139102572	0
76.8417006996452	76.5683771972422	75.7260416966355	74.185505154237	71.6763937328981	67.6503339548745	60.8890294222069	48.0826591702936	15.2584678003791	0
76.8426022289795	76.5692260005433	75.7267994758941	74.186139312458	71.6768782156916	67.6506474738201	60.8891478641147	48.0825279418503	15.2578210285325	0
76.8435013631829	76.5700725077415	75.7275551246122	74.1867715642969	71.6773610607505	67.6509596477744	60.8892652524257	48.0823959169921	15.2571735964519	0
76.8443981071137	76.5709167236141	75.7283086474208	74.1874019141161	71.6778422720112	67.6512704801049	60.8893815898563	48.0822630978072	15.2565255058652	0
76.8452924656245	76.5717586529318	75.7290600489426	74.1880303662672	71.6783218533994	67.6515799741686	60.8894968791136	48.0821294863763	15.2558767584941	0
76.8461844435626	76.5725983004589	75.7298093337915	74.188656925092	71.6787998088295	67.6518881333115	60.8896111228953	48.0819950847723	15.255227356054	0
76.8470740457699	76.5734356709526	75.730556506573	74.1892815949219	71.679276142205	67.6521949608692	60.8897243238899	48.081859895061	15.2545773002537	0
76.8479612770823	76.5742707691636	75.731301571884	74.189904380078	71.6797508574184	67.6525004601666	60.8898364847768	48.0817239193005	15.253926592796	0
76.8488461423305	76.5751035998357	75.7320445343128	74.1905252848715	71.6802239583516	67.6528046345181	60.8899476082259	48.0815871595419	15.2532752353775	0
76.8497286463393	76.575934167706	75.7327853984394	74.1911443136034	71.6806954488751	67.6531074872279	60.8900576968983	48.0814496178286	15.2526232296883	0
76.8506087939278	76.5767624775047	75.7335241688351	74.1917614705645	71.6811653328491	67.6534090215895	60.890166753446	48.0813112961969	15.2519705774125	0
76.8514865899094	76.5775885339554	75.7342608500625	74.1923767600357	71.6816336141228	67.6537092408861	60.890274780512	48.081172196676	15.2513172802283	0
76.8523620390919	76.5784123417745	75.7349954466758	74.1929901862876	71.6821002965347	67.6540081483906	60.8903817807301	48.0810323212875	15.2506633398075	0
76.853235146277	76.5792339056717	75.7357279632208	74.1936017535811	71.6825653839125	67.6543057473657	60.8904877567255	48.0808916720463	15.250008757816	0
76.8541059162607	76.5800532303499	75.7364584042346	74.1942114661668	71.6830288800735	67.6546020410638	60.8905927111143	48.08075025096	15.2493535359136	0
76.8549743538332	76.5808703205049	75.7371867742458	74.1948193282856	71.6834907888243	67.6548970327273	60.8906966465041	48.080608060029	15.2486976757543	0
76.8558404637785	76.5816851808257	75.7379130777745	74.1954253441682	71.6839511139608	67.6551907255884	60.8907995654933	48.0804651012468	15.2480411789859	0
76.8567042508749	76.5824978159943	75.7386373193321	74.1960295180356	71.6844098592688	67.6554831228692	60.890901470672	48.0803213766	15.2473840472504	0
76.8575657198947	76.5833082306856	75.7393595034218	74.1966318540988	71.684867028523	67.6557742277818	60.8910023646214	48.0801768880681	15.2467262821841	0
76.858424875604	76.5841164295677	75.740079634538	74.197232356559	71.6853226254883	67.6560640435286	60.891102249914	48.0800316376237	15.2460678854172	0
76.859281722763	76.5849224173015	75.7407977171667	74.1978310296074	71.6857766539189	67.6563525733016	60.8912011291141	48.0798856272326	15.2454088585742	0
76.8601362661259	76.585726198541	75.7415137557854	74.1984278774255	71.6862291175586	67.6566398202834	60.8912990047769	48.0797388588537	15.2447492032739	0
76.8609885104406	76.586527777933	75.7422277548629	74.199022904185	71.6866800201411	67.6569257876465	60.8913958794496	48.0795913344393	15.2440889211292	0
76.8618384604489	76.5873271601174	75.7429397188597	74.1996161140479	71.6871293653897	67.6572104785538	60.8914917556708	48.0794430559345	15.2434280137474	0
76.8626861208864	76.5881243497269	75.7436496522277	74.2002075111663	71.6875771570174	67.6574938961584	60.8915866359706	48.0792940252782	15.2427664827302	0
76.8635314964825	76.588919351387	75.7443575594104	74.2007970996826	71.6880233987273	67.6577760436037	60.8916805228709	48.0791442444022	15.2421043296734	0
76.8643745919605	76.5897121697164	75.7450634448425	74.2013848837297	71.6884680942121	67.6580569240236	60.8917734188853	48.078993715232	15.2414415561675	0
76.8652154120372	76.5905028093263	75.7457673129506	74.2019708674306	71.6889112471544	67.6583365405423	60.8918653265188	48.0788424396863	15.2407781637972	0
76.8660539614233	76.5912912748208	75.7464691681525	74.2025550548989	71.689352861227	67.6586148962744	60.8919562482687	48.0786904196771	15.2401141541418	0
76.8668902448231	76.5920775707971	75.7471690148576	74.2031374502382	71.6897929400924	67.6588919943253	60.8920461866238	48.0785376571103	15.2394495287751	0
76.8677242669345	76.5928617018449	75.7478668574669	74.2037180575428	71.6902314874031	67.6591678377905	60.8921351440648	48.0783841538847	15.2387842892651	0
76.8685560324491	76.5936436725469	75.7485627003728	74.2042968808974	71.6906685068019	67.6594424297566	60.8922231230644	48.0782299118933	15.2381184371748	0
76.869385546052	76.5944234874783	75.7492565479592	74.2048739243772	71.6911040019216	67.6597157733005	60.8923101260871	48.0780749330221	15.2374519740615	0
76.8702128124219	76.5952011512075	75.7499484046018	74.2054491920476	71.6915379763849	67.6599878714898	60.8923961555895	48.0779192191511	15.2367849014771	0
76.8710378362312	76.5959766682952	75.7506382746674	74.2060226879647	71.6919704338049	67.6602587273831	60.8924812140203	48.0777627721537	15.2361172209684	0
76.8718606221455	76.5967500432951	75.7513261625147	74.2065944161752	71.6924013777849	67.6605283440294	60.8925653038201	48.0776055938971	15.2354489340766	0
76.8726811748242	76.5975212807537	75.7520120724938	74.2071643807163	71.6928308119184	67.6607967244689	60.8926484274218	48.0774476862422	15.2347800423376	0
76.8734994989199	76.5982903852099	75.7526960089462	74.2077325856155	71.6932587397891	67.6610638717324	60.8927305872502	48.0772890510437	15.2341105472823	0
76.8743155990789	76.5990573611956	75.7533779762052	74.2082990348913	71.6936851649711	67.6613297888415	60.8928117857227	48.0771296901498	15.2334404504361	0
76.8751294799406	76.5998222132352	75.7540579785956	74.2088637325526	71.6941100910289	67.6615944788092	60.8928920252485	48.076969605403	15.2327697533193	0
76.8759411461381	76.6005849458458	75.7547360204337	74.2094266825989	71.6945335215173	67.661857944639	60.8929713082293	48.0768087986392	15.2320984574469	0
76.8767506022978	76.6013455635373	75.7554121060273	74.2099878890206	71.6949554599815	67.6621201893256	60.8930496370592	48.0766472716884	15.2314265643289	0
76.8775578530392	76.602104070812	75.7560862396758	74.2105473557984	71.6953759099573	67.6623812158549	60.8931270141244	48.0764850263744	15.2307540754701	0
76.8783629029755	76.6028604721651	75.7567584256704	74.2111050869041	71.6957948749708	67.6626410272038	60.8932034418037	48.0763220645152	15.2300809923703	0
76.8791657567129	76.6036147720843	75.7574286682937	74.2116610863	71.6962123585388	67.6628996263403	60.8932789224683	48.0761583879225	15.2294073165239	0
76.8799664188511	76.6043669750499	75.7580969718198	74.2122153579393	71.6966283641687	67.6631570162236	60.8933534584818	48.075993998402	15.2287330494208	0
76.8807648939829	76.6051170855348	75.7587633405145	74.2127679057658	71.6970428953583	67.6634131998043	60.8934270522003	48.0758288977537	15.2280581925453	0
76.8815611866943	76.6058651080045	75.7594277786354	74.2133187337144	71.6974559555961	67.6636681800239	60.8934997059726	48.0756630877714	15.2273827473772	0
76.8823553015648	76.6066110469172	75.7600902904313	74.2138678457104	71.6978675483615	67.6639219598157	60.8935714221399	48.0754965702433	15.2267067153911	0
76.8831472431668	76.6073549067235	75.7607508801429	74.2144152456704	71.6982776771244	67.6641745421039	60.8936422030361	48.0753293469514	15.2260300980567	0
76.8839370160661	76.6080966918666	75.7614095520025	74.2149609375016	71.6986863453454	67.6644259298043	60.8937120509877	48.0751614196721	15.2253528968387	0
76.8847246248215	76.6088364067825	75.7620663102339	74.2155049251022	71.699093556476	67.6646761258242	60.893780968314	48.074992790176	15.2246751131971	0
76.885510073985	76.6095740558995	75.7627211590528	74.2160472123611	71.6994993139584	67.6649251330622	60.893848957327	48.0748234602277	15.2239967485869	0
76.8862933681018	76.6103096436384	75.7633741026661	74.2165878031586	71.6999036212258	67.6651729544084	60.8939160203313	48.0746534315863	15.2233178044584	0
76.88707451171	76.6110431744126	75.7640251452729	74.2171267013654	71.7003064817022	67.6654195927446	60.8939821596246	48.0744827060051	15.2226382822571	0
76.8878535093411	76.6117746526282	75.7646742910635	74.2176639108437	71.7007078988025	67.665665050944	60.8940473774971	48.0743112852317	15.2219581834234	0
76.8886303655194	76.6125040826836	75.76532154422	74.2181994354464	71.7011078759325	67.6659093318716	60.8941116762322	48.0741391710081	15.2212775093935	0
76.8894050847624	76.6132314689698	75.7659669089163	74.2187332790175	71.7015064164889	67.6661524383838	60.8941750581059	48.0739663650707	15.2205962615984	0
76.8901776715806	76.6139568158702	75.7666103893179	74.219265445392	71.7019035238598	67.6663943733289	60.8942375253874	48.0737928691501	15.2199144414646	0
76.8909481304774	76.6146801277609	75.7672519895819	74.2197959383962	71.7022992014239	67.6666351395469	60.8942990803387	48.0736186849716	15.2192320504139	0
76.8917164659495	76.6154014090102	75.7678917138573	74.2203247618471	71.7026934525512	67.6668747398694	60.8943597252149	48.0734438142548	15.2185490898635	0
76.8924826824864	76.6161206639792	75.7685295662845	74.2208519195533	71.7030862806027	67.66711317712	60.8944194622641	48.0732682587138	15.2178655612259	0
76.8932467845705	76.6168378970212	75.7691655509959	74.2213774153142	71.7034776889307	67.667350454114	60.8944782937274	48.0730920200574	15.2171814659089	0
76.8940087766772	76.6175531124821	75.7697996721155	74.2219012529204	71.7038676808786	67.6675865736585	60.8945362218392	48.0729150999886	15.216496805316	0
76.8947686632751	76.6182663147003	75.770431933759	74.2224234361538	71.7042562597808	67.6678215385528	60.8945932488269	48.0727375002053	15.2158115808459	0
76.8955264488254	76.6189775080066	75.7710623400338	74.2229439687875	71.7046434289632	67.6680553515878	60.8946493769111	48.0725592223999	15.2151257938928	0
76.8962821377825	76.6196866967242	75.7716908950391	74.2234628545857	71.7050291917429	67.6682880155466	60.8947046083056	48.0723802682593	15.2144394458466	0
76.8970357345934	76.6203938851689	75.772317602866	74.223980097304	71.7054135514282	67.6685195332041	60.8947589452175	48.0722006394652	15.2137525380924	0
76.8977872436982	76.6210990776487	75.7729424675971	74.2244957006891	71.7057965113189	67.6687499073276	60.8948123898472	48.0720203376939	15.213065072011	0
76.8985366695299	76.6218022784643	75.7735654933069	74.2250096684792	71.706178074706	67.6689791406759	60.8948649443882	48.0718393646166	15.2123770489789	0
76.8992840165143	76.6225034919087	75.7741866840617	74.2255220044038	71.706558244872	67.6692072360005	60.8949166110275	48.071657721899	15.2116884703679	0
76.9000292890699	76.6232027222673	75.7748060439195	74.2260327121834	71.7069370250906	67.6694341960447	60.8949673919455	48.0714754112016	15.2109993375456	0
76.9007724916085	76.623899973818	75.77542357693	74.2265417955303	71.7073144186273	67.6696600235441	60.8950172893158	48.0712924341798	15.2103096518751	0
76.9015136285342	76.6245952508312	75.7760392871351	74.227049258148	71.7076904287388	67.6698847212264	60.8950663053058	48.0711087924837	15.2096194147153	0
76.9022527042442	76.6252885575694	75.776653178568	74.2275551037313	71.7080650586735	67.6701082918117	60.8951144420759	48.0709244877584	15.2089286274207	0
76.9029897231285	76.6259798982879	75.7772652552541	74.2280593359665	71.7084383116712	67.6703307380122	60.8951617017803	48.0707395216436	15.2082372913415	0
76.9037246895698	76.6266692772341	75.7778755212104	74.2285619585315	71.7088101909632	67.6705520625325	60.8952080865667	48.0705538957742	15.2075454078236	0
76.9044576079438	76.627356698648	75.778483980446	74.2290629750953	71.7091806997727	67.6707722680695	60.8952535985761	48.0703676117797	15.2068529782086	0
76.9051884826187	76.628042166762	75.7790906369615	74.2295623893188	71.7095498413142	67.6709913573127	60.8952982399435	48.0701806712848	15.2061600038339	0
76.9059173179556	76.6287256858008	75.7796954947495	74.2300602048542	71.7099176187941	67.6712093329435	60.8953420127971	48.069993075909	15.2054664860328	0
76.9066441183084	76.6294072599816	75.7802985577947	74.2305564253451	71.7102840354104	67.6714261976363	60.8953849192589	48.069804827267	15.2047724261342	0
76.9073688880237	76.6300868935139	75.7808998300733	74.2310510544269	71.7106490943526	67.6716419540576	60.8954269614448	48.0696159269682	15.2040778254629	0
76.9080916314409	76.6307645905996	75.7814993155536	74.2315440957265	71.7110127988024	67.6718566048665	60.8954681414639	48.0694263766172	15.2033826853396	0
76.908812352892	76.6314403554332	75.7820970181958	74.2320355528622	71.7113751519329	67.6720701527146	60.8955084614195	48.0692361778138	15.2026870070808	0
76.9095310567018	76.6321141922013	75.7826929419519	74.2325254294441	71.7117361569091	67.6722826002461	60.8955479234085	48.0690453321527	15.2019907919989	0
76.9102477471878	76.6327861050831	75.7832870907658	74.233013729074	71.7120958168879	67.6724939500978	60.8955865295213	48.0688538412237	15.2012940414023	0
76.9109624286602	76.6334560982501	75.7838794685734	74.2335004553451	71.7124541350179	67.6727042048991	60.8956242818427	48.0686617066118	15.2005967565951	0
76.911675105422	76.6341241758661	75.7844700793027	74.2339856118425	71.7128111144398	67.6729133672721	60.8956611824507	48.0684689298972	15.1998989388775	0
76.9123857817689	76.6347903420876	75.7850589268732	74.2344692021429	71.7131667582861	67.6731214398313	60.8956972334176	48.0682755126551	15.1992005895458	0
76.9130944619889	76.6354546010632	75.7856460151968	74.2349512298146	71.7135210696811	67.6733284251844	60.8957324368094	48.0680814564562	15.198501709892	0
76.9138011503632	76.636116956934	75.786231348177	74.2354316984179	71.7138740517413	67.6735343259315	60.8957667946861	48.0678867628662	15.1978023012042	0
76.9145058511654	76.6367774138333	75.7868149297096	74.2359106115047	71.7142257075752	67.6737391446654	60.8958003091018	48.067691433446	15.1971023647667	0
76.9152085686618	76.6374359758872	75.7873967636821	74.2363879726185	71.7145760402829	67.673942883972	60.8958329821041	48.0674954697519	15.1964019018596	0
76.9159093071112	76.6380926472138	75.7879768539742	74.2368637852949	71.7149250529572	67.6741455464298	60.8958648157352	48.0672988733355	15.1957009137592	0
76.9166080707655	76.6387474319237	75.7885552044574	74.2373380530611	71.7152727486825	67.6743471346103	60.8958958120309	48.0671016457437	15.1949994017378	0
76.9173048638687	76.6394003341199	75.7891318189955	74.2378107794364	71.7156191305354	67.6745476510776	60.8959259730212	48.0669037885186	15.1942973670639	0
76.9179996906578	76.6400513578979	75.789706701444	74.2382819679315	71.7159642015847	67.6747470983892	60.8959553007302	48.0667053031978	15.193594811002	0
76.9186925553623	76.6407005073455	75.7902798556506	74.2387516220495	71.7163079648914	67.674945479095	60.8959837971761	48.0665061913143	15.1928917348129	0
76.9193834622044	76.6413477865428	75.790851285455	74.2392197452849	71.7166504235085	67.6751427957383	60.8960114643713	48.0663064543963	15.1921881397534	0
76.9200724153989	76.6419931995623	75.7914209946891	74.2396863411245	71.7169915804813	67.6753390508552	60.8960383043221	48.0661060939678	15.1914840270765	0
76.9207594191531	76.6426367504692	75.7919889871766	74.2401514130469	71.7173314388475	67.6755342469748	60.8960643190294	48.0659051115478	15.1907793980315	0
76.9214444776671	76.6432784433206	75.7925552667335	74.2406149645225	71.7176700016367	67.6757283866193	60.8960895104879	48.065703508651	15.1900742538638	0
76.9221275951334	76.6439182821664	75.7931198371677	74.2410769990138	71.7180072718711	67.6759214723041	60.8961138806867	48.0655012867875	15.189368595815	0
76.9228087757374	76.6445562710488	75.7936827022794	74.2415375199755	71.718343252565	67.6761135065374	60.8961374316094	48.0652984474632	15.1886624251231	0
76.9234880236568	76.6451924140021	75.7942438658607	74.2419965308539	71.7186779467253	67.6763044918209	60.8961601652335	48.065094992179	15.1879557430223	0
76.9241653430621	76.6458267150535	75.794803331696	74.2424540350875	71.7190113573509	67.6764944306492	60.896182083531	48.0648909224318	15.1872485507429	0
76.9248407381163	76.6464591782223	75.7953611035616	74.2429100361071	71.7193434874334	67.6766833255101	60.8962031884683	48.0646862397138	15.1865408495117	0
76.9255142129751	76.6470898075202	75.7959171852263	74.2433645373353	71.7196743399566	67.6768711788848	60.896223482006	48.064480945513	15.1858326405519	0
76.9261857717866	76.6477186069514	75.7964715804506	74.2438175421866	71.7200039178968	67.6770579932476	60.8962429660992	48.0642750413127	15.1851239250827	0
76.9268554186916	76.6483455805124	75.7970242929875	74.2442690540682	71.7203322242229	67.6772437710661	60.8962616426973	48.0640685285922	15.18441470432	0
76.9275231578235	76.6489707321922	75.7975753265821	74.2447190763788	71.7206592618961	67.6774285148012	60.8962795137442	48.0638614088262	15.1837049794759	0
76.9281889933083	76.6495940659723	75.7981246849715	74.2451676125096	71.7209850338701	67.677612226907	60.8962965811784	48.063653683485	15.1829947517588	0
76.9288529292644	76.6502155858264	75.7986723718852	74.245614665844	71.7213095430913	67.6777949098311	60.8963128469326	48.0634453540349	15.1822840223736	0
76.9295149698031	76.6508352957208	75.7992183910449	74.2460602397574	71.7216327924986	67.6779765660146	60.8963283129341	48.0632364219376	15.1815727925218	0
76.930175119028	76.6514531996141	75.7997627461643	74.2465043376174	71.7219547850233	67.6781571978915	60.896342981105	48.0630268886507	15.1808610634009	0
76.9308333810354	76.6520693014574	75.8003054409497	74.2469469627839	71.7222755235895	67.6783368078897	60.8963568533614	48.0628167556275	15.1801488362053	0
76.931489759914	76.6526836051943	75.8008464790992	74.2473881186092	71.7225950111139	67.6785153984304	60.8963699316145	48.0626060243169	15.1794361121255	0
76.9321442597454	76.6532961147607	75.8013858643034	74.2478278084375	71.7229132505058	67.6786929719282	60.8963822177699	48.0623946961638	15.1787228923487	0
76.9327968846034	76.653906834085	75.8019236002452	74.2482660356056	71.7232302446673	67.6788695307913	60.8963937137276	48.0621827726089	15.1780091780586	0
76.9334476385546	76.654515767088	75.8024596905996	74.2487028034423	71.723545996493	67.6790450774213	60.8964044213826	48.0619702550885	15.1772949704353	0
76.9340965256582	76.655122917683	75.802994139034	74.2491381152691	71.7238605088704	67.6792196142134	60.8964143426244	48.0617571450349	15.1765802706554	0
76.9347435499658	76.6557282897757	75.8035269492082	74.2495719743995	71.7241737846796	67.6793931435565	60.8964234793371	48.0615434438763	15.1758650798923	0
76.9353887155216	76.6563318872642	75.8040581247739	74.2500043841395	71.7244858267937	67.6795656678328	60.8964318333996	48.0613291530367	15.1751493993157	0
76.9360320263625	76.6569337140394	75.8045876693757	74.2504353477874	71.7247966380782	67.6797371894184	60.8964394066856	48.0611142739359	15.1744332300919	0
76.9366734865177	76.6575337739841	75.8051155866499	74.250864868634	71.7251062213919	67.6799077106829	60.8964462010633	48.0608988079897	15.173716573384	0
76.9373131000094	76.658132070974	75.8056418802257	74.2512929499624	71.7254145795861	67.6800772339896	60.896452218396	48.0606827566099	15.1729994303514	0
76.9379508708519	76.6587286088772	75.8061665537244	74.2517195950482	71.725721715505	67.6802457616955	60.8964574605416	48.0604661212041	15.1722818021503	0
76.9385868030524	76.6593233915541	75.8066896107594	74.2521448071593	71.7260276319858	67.6804132961512	60.8964619293528	48.0602489031759	15.1715636899336	0
76.9392209006104	76.6599164228578	75.8072110549371	74.2525685895563	71.7263323318586	67.6805798397013	60.8964656266772	48.060031103925	15.1708450948507	0
76.9398531675182	76.6605077066337	75.8077308898557	74.252990945492	71.7266358179463	67.6807453946838	60.8964685543572	48.0598127248468	15.1701260180478	0
76.9404836077606	76.6610972467197	75.808249119106	74.253411878212	71.7269380930649	67.6809099634308	60.8964707142302	48.0595937673331	15.1694064606676	0
76.9411122253149	76.6616850469465	75.8087657462714	74.2538313909543	71.7272391600232	67.681073548268	60.8964721081283	48.0593742327715	15.1686864238497	0
76.941739024151	76.6622711111368	75.8092807749275	74.2542494869492	71.7275390216231	67.681236151515	60.8964727378787	48.0591541225456	15.1679659087303	0
76.9423640082315	76.6628554431063	75.8097942086423	74.2546661694199	71.7278376806596	67.6813977754853	60.8964726053035	48.0589334380351	15.1672449164422	0
76.9429871815113	76.6634380466628	75.8103060509764	74.255081441582	71.7281351399207	67.6815584224862	60.8964717122196	48.058712180616	15.1665234481153	0
76.9436085479381	76.6640189256069	75.8108163054827	74.2554953066437	71.7284314021872	67.6817180948188	60.8964700604391	48.0584903516601	15.1658015048758	0
76.9442281114521	76.6645980837316	75.8113249757068	74.2559077678058	71.7287264702334	67.6818767947784	60.896467651769	48.0582679525355	15.1650790878471	0
76.9448458759862	76.6651755248225	75.8118320651866	74.2563188282618	71.7290203468265	67.682034524654	60.8964644880112	48.0580449846062	15.164356198149	0
76.9454618454656	76.6657512526576	75.8123375774525	74.2567284911978	71.7293130347267	67.6821912867287	60.896460570963	48.0578214492327	15.1636328368984	0
76.9460760238084	76.6663252710077	75.8128415160274	74.2571367597925	71.7296045366875	67.6823470832793	60.8964559024163	48.0575973477713	15.1629090052088	0
76.946688414925	76.6668975836358	75.8133438844267	74.2575436372173	71.7298948554556	67.6825019165771	60.8964504841584	48.0573726815748	15.1621847041905	0
76.9472990227187	76.6674681942977	75.8138446861585	74.2579491266363	71.7301839937708	67.6826557888869	60.8964443179715	48.057147451992	15.1614599349509	0
76.9479078510851	76.6680371067417	75.8143439247232	74.2583532312065	71.7304719543661	67.6828087024679	60.8964374056332	48.0569216603678	15.160734698594	0
76.9485149039126	76.6686043247086	75.814841603614	74.2587559540772	71.7307587399678	67.6829606595733	60.8964297489159	48.0566953080436	15.1600089962208	0
76.949120185082	76.6691698519319	75.8153377263164	74.259157298391	71.7310443532955	67.6831116624502	60.8964213495874	48.0564683963568	15.1592828289289	0
76.9497236984668	76.6697336921376	75.8158322963087	74.2595572672827	71.7313287970618	67.6832617133401	60.8964122094104	48.0562409266413	15.1585561978133	0
76.9503254479332	76.6702958490442	75.8163253170615	74.2599558638803	71.7316120739731	67.6834108144784	60.8964023301432	48.0560129002271	15.1578291039653	0
76.9509254373399	76.670856326363	75.8168167920385	74.2603530913045	71.7318941867284	67.6835589680949	60.896391713539	48.0557843184404	15.1571015484736	0
76.9527148836778	76.6725277177931	75.8182819768364	74.261536589635	71.732733566954	67.6839977660218	60.8963554571655	48.0550952540537	15.1549161229753	0
