# Supplementary material for: A model of aerosol evaporation kinetics in a thermodenuder
Source: Copernicus journal article supplement (doi:10.5194/amt-3-579-2010), 2010-05-11
Supplement: Supplementary file 1 [file amt-3-579-2010-supplement.zip › Figure 6f Data.txt]

Distance
0
0.0523885021010821
0.104777004202164
0.157165506303246
0.209554008404328
0.26194251050541
0.314331012606492
0.366719514707574
0.419108016808657
0.471496518909739
0.523885021010821
0.576273523111903
0.628662025212985
0.681050527314067
0.733439029415149
0.785827531516231
0.838216033617313
0.890604535718395
0.942993037819477
0.995381539920559
1.04777004202164
1.10015854412272
1.15254704622381
1.20493554832489
1.25732405042597
1.30971255252705
1.36210105462813
1.41448955672922
1.4668780588303
1.51926656093138
1.57165506303246
1.62404356513354
1.67643206723463
1.72882056933571
1.78120907143679
1.83359757353787
1.88598607563895
1.93837457774004
1.99076307984112
2.0431515819422
2.09554008404328
2.14792858614436
2.20031708824545
2.25270559034653
2.30509409244761
2.35748259454869
2.40987109664978
2.46225959875086
2.51464810085194
2.56703660295302
2.6194251050541
2.67181360715519
2.72420210925627
2.77659061135735
2.82897911345843
2.88136761555951
2.9337561176606
2.98614461976168
3.03853312186276
3.09092162396384
3.14331012606492
3.19569862816601
3.24808713026709
3.30047563236817
3.35286413446925
3.40525263657033
3.45764113867142
3.5100296407725
3.56241814287358
3.61480664497466
3.66719514707574
3.71958364917683
3.77197215127791
3.82436065337899
3.87674915548007
3.92913765758115
3.98152615968224
4.03391466178332
4.0863031638844
4.13869166598548
4.19108016808657
4.24346867018765
4.29585717228873
4.34824567438981
4.40063417649089
4.45302267859198
4.50541118069306
4.55779968279414
4.61018818489522
4.6625766869963
4.71496518909739
4.76735369119847
4.81974219329955
4.87213069540063
4.92451919750171
4.9769076996028
5.02929620170388
5.08168470380496
5.13407320590604
5.18646170800712
5.23885021010821
5.29123871220929
5.34362721431037
5.39601571641145
5.44840421851254
5.50079272061362
5.5531812227147
5.60556972481578
5.65795822691686
5.71034672901795
5.76273523111903
5.81512373322011
5.86751223532119
5.91990073742227
5.97228923952336
6.02467774162444
6.07706624372552
6.1294547458266
6.18184324792768
6.23423175002877
6.28662025212985
6.33900875423093
6.39139725633201
6.44378575843309
6.49617426053418
6.54856276263526
6.60095126473634
6.65333976683742
6.7057282689385
6.75811677103959
6.81050527314067
6.86289377524175
6.91528227734283
6.96767077944391
7.020059281545
7.07244778364608
7.12483628574716
7.17722478784824
7.22961328994933
7.28200179205041
7.33439029415149
7.38677879625257
7.43916729835365
7.49155580045474
7.54394430255582
7.5963328046569
7.64872130675798
7.70110980885906
7.75349831096015
7.80588681306123
7.85827531516231
7.91066381726339
7.96305231936447
8.01544082146556
8.06782932356664
8.12021782566772
8.1726063277688
8.22499482986989
8.27738333197097
8.32977183407205
8.38216033617313
8.43454883827421
8.4869373403753
8.53932584247638
8.59171434457746
8.64410284667854
8.69649134877962
8.74887985088071
8.80126835298179
8.85365685508287
8.90604535718395
8.95843385928503
9.01082236138611
9.0632108634872
9.11559936558828
9.16798786768936
9.22037636979044
9.27276487189152
9.32515337399261
9.37754187609369
9.42993037819477
9.48231888029585
9.53470738239694
9.58709588449802
9.6394843865991
9.69187288870018
9.74426139080126
9.79664989290235
9.84903839500343
9.90142689710451
9.95381539920559
10.0062039013067
10.0585924034078
10.1109809055088
10.1633694076099
10.215757909711
10.2681464118121
10.3205349139132
10.3729234160142
10.4253119181153
10.4777004202164
10.5300889223175
10.5824774244186
10.6348659265197
10.6872544286207
10.7396429307218
10.7920314328229
10.844419934924
10.8968084370251
10.9491969391262
11.0015854412272
11.0539739433283
11.1063624454294
11.1587509475305
11.2111394496316
11.2635279517326
11.3159164538337
11.3683049559348
11.4206934580359
11.473081960137
11.5254704622381
11.5778589643391
11.6302474664402
11.6826359685413
11.7350244706424
11.7874129727435
11.8398014748445
11.8921899769456
11.9445784790467
11.9969669811478
12.0493554832489
12.10174398535
12.154132487451
12.2065209895521
12.2589094916532
12.3112979937543
12.3636864958554
12.4160749979564
12.4684635000575
12.5208520021586
12.5732405042597
12.6256290063608
12.6780175084619
12.7304060105629
12.782794512664
12.8351830147651
12.8875715168662
12.9399600189673
12.9923485210684
13.0447370231694
13.0971255252705
13.1495140273716
13.2019025294727
13.2542910315738
13.3066795336748
13.3590680357759
13.411456537877
13.4638450399781
13.5162335420792
13.5686220441803
13.6210105462813
13.6733990483824
13.7257875504835
13.7781760525846
13.8305645546857
13.8829530567867
13.9353415588878
13.9877300609889
14.04011856309
14.0925070651911
14.1448955672922
14.1972840693932
14.2496725714943
14.3020610735954
14.3544495756965
14.4068380777976
14.4592265798987
14.5116150819997
14.5640035841008
14.6163920862019
14.668780588303
14.7211690904041
14.7735575925051
14.8259460946062
14.8783345967073
14.9307230988084
14.9831116009095
15.0355001030106
15.0878886051116
15.1402771072127
15.1926656093138
15.2450541114149
15.297442613516
15.349831115617
15.4022196177181
15.4546081198192
15.5069966219203
15.5593851240214
15.6117736261225
15.6641621282235
15.7165506303246
15.7689391324257
15.8213276345268
15.8737161366279
15.9261046387289
15.97849314083
16.0308816429311
16.0832701450322
16.1356586471333
16.1880471492344
16.2404356513354
16.2928241534365
16.3452126555376
16.3976011576387
16.4499896597398
16.5023781618408
16.5547666639419
16.607155166043
16.6595436681441
16.7119321702452
16.7643206723463
16.8167091744473
16.8690976765484
16.9214861786495
16.9738746807506
17.0262631828517
17.0786516849528
17.1310401870538
17.1834286891549
17.235817191256
17.2882056933571
17.3405941954582
17.3929826975592
17.4453711996603
17.4977597017614
17.5501482038625
17.6025367059636
17.6549252080647
17.7073137101657
17.7597022122668
17.8120907143679
17.864479216469
17.9168677185701
17.9692562206711
18.0216447227722
18.0740332248733
18.1264217269744
18.1788102290755
18.2311987311766
18.2835872332776
18.3359757353787
18.3883642374798
18.4407527395809
18.493141241682
18.545529743783
18.5979182458841
18.6503067479852
18.7026952500863
18.7550837521874
18.8074722542885
18.8598607563895
18.9122492584906
18.9646377605917
19.0170262626928
19.0694147647939
19.121803266895
19.174191768996
19.2265802710971
19.2789687731982
19.3313572752993
19.3837457774004
19.4361342795014
19.4885227816025
19.5409112837036
19.5932997858047
19.6456882879058
19.6980767900069
19.7504652921079
19.802853794209
19.8552422963101
19.9076307984112
19.9600193005123
20.0124078026133
20.0647963047144
20.1171848068155
20.1695733089166
20.2219618110177
20.2743503131188
20.3267388152198
20.3791273173209
20.431515819422
20.4839043215231
20.5362928236242
20.5886813257253
20.6410698278263
20.6934583299274
20.7458468320285
20.7982353341296
20.8506238362307
20.9030123383317
20.9554008404328
21.0077893425339
21.060177844635
21.1125663467361
21.1649548488372
21.2173433509382
21.2697318530393
21.3221203551404
21.3745088572415
21.4268973593426
21.4792858614436
21.5316743635447
21.5840628656458
21.6364513677469
21.688839869848
21.7412283719491
21.7936168740501
21.8460053761512
21.8983938782523
21.9507823803534
22.0031708824545
22.0555593845556
22.1079478866566
22.1603363887577
22.2127248908588
22.2651133929599
22.317501895061
22.369890397162
22.4222788992631
22.4746674013642
22.5270559034653
22.5794444055664
22.6318329076675
22.6842214097685
22.7366099118696
22.7889984139707
22.8413869160718
22.8937754181729
22.9461639202739
22.998552422375
23.0509409244761
23.1033294265772
23.1557179286783
23.2081064307794
23.2604949328804
23.3128834349815
23.3652719370826
23.4176604391837
23.4700489412848
23.5224374433859
23.5748259454869
23.627214447588
23.6796029496891
23.7319914517902
23.7843799538913
23.8367684559923
23.8891569580934
23.9415454601945
23.9939339622956
24.0463224643967
24.0987109664977
24.1510994685988
24.2034879706999
24.255876472801
24.3082649749021
24.3606534770032
24.4130419791042
24.4654304812053
24.5178189833064
24.5702074854075
24.6225959875086
24.6749844896097
24.7273729917107
24.7797614938118
24.8321499959129
24.884538498014
24.9369270001151
24.9893155022161
25.0417040043172
25.0940925064183
25.1464810085194
25.1988695106205
25.2512580127216
25.3036465148226
25.3560350169237
25.4084235190248
25.4608120211259
25.513200523227
25.5655890253281
25.6179775274291
25.6703660295302
25.7227545316313
25.7751430337324
25.8275315358335
25.8799200379345
25.9323085400356
25.9846970421367
26.0370855442378
26.0894740463389
26.14186254844
26.194251050541
26.2466395526421
26.2990280547432
26.3514165568443
26.4038050589454
26.4561935610464
26.5085820631475
26.5609705652486
26.6133590673497
26.6657475694508
26.7181360715519
26.7705245736529
26.822913075754
26.8753015778551
26.9276900799562
26.9800785820573
27.0324670841583
27.0848555862594
27.1372440883605
27.1896325904616
27.2420210925627
27.2944095946638
27.3467980967648
27.3991865988659
27.451575100967
27.5039636030681
27.5563521051692
27.6087406072702
27.6611291093713
27.7135176114724
27.7659061135735
27.8182946156746
27.8706831177757
27.9230716198767
27.9754601219778
28.0278486240789
28.08023712618
28.1326256282811
28.1850141303822
28.2374026324832
28.2897911345843
28.3421796366854
28.3945681387865
28.4469566408876
28.4993451429886
28.5517336450897
28.6041221471908
28.6565106492919
28.708899151393
28.7612876534941
28.8136761555951
28.8660646576962
28.9184531597973
28.9708416618984
29.0232301639995
29.0756186661005
29.1280071682016
29.1803956703027
29.2327841724038
29.2851726745049
29.337561176606
29.389949678707
29.4423381808081
29.4947266829092
29.5471151850103
29.5995036871114
29.6518921892124
29.7042806913135
29.7566691934146
29.8090576955157
29.8614461976168
29.9138346997179
29.9662232018189
30.01861170392
30.0710002060211
30.1233887081222
30.1757772102233
30.2281657123244
30.2805542144254
30.3329427165265
30.3853312186276
30.4377197207287
30.4901082228298
30.5424967249308
30.5948852270319
30.647273729133
30.6996622312341
30.7520507333352
30.8044392354363
30.8568277375373
30.9092162396384
30.9616047417395
31.0139932438406
31.0663817459417
31.1187702480428
31.1711587501438
31.2235472522449
31.275935754346
31.3283242564471
31.3807127585482
31.4331012606492
31.4854897627503
31.5378782648514
31.5902667669525
31.6426552690536
31.6950437711547
31.7474322732557
31.7998207753568
31.8522092774579
31.904597779559
31.9569862816601
32.0093747837611
32.0617632858622
32.1141517879633
32.1665402900644
32.2189287921655
32.2713172942666
32.3237057963676
32.3760942984687
32.4284828005698
32.4808713026709
32.533259804772
32.585648306873
32.6380368089741
32.6904253110752
32.7428138131763
32.7952023152774
32.8475908173785
32.8999793194795
32.9523678215806
33.0047563236817
33.0571448257828
33.1095333278839
33.1619218299849
33.214310332086
33.2666988341871
33.3190873362882
33.3714758383893
33.4238643404904
33.4762528425914
33.5286413446925
33.5810298467936
33.6334183488947
33.6858068509958
33.7381953530968
33.7905838551979
33.842972357299
33.8953608594001
33.9477493615012
34.0001378636023
34.0525263657033
34.1049148678044
34.1573033699055
34.2096918720066
34.2620803741077
34.3144688762088
34.3668573783098
34.4192458804109
34.471634382512
34.5240228846131
34.5764113867142
34.6287998888153
34.6811883909163
34.7335768930174
34.7859653951185
34.8383538972196
34.8907423993207
34.9431309014217
34.9955194035228
35.0479079056239
35.100296407725
35.1526849098261
35.2050734119271
35.2574619140282
35.3098504161293
35.3622389182304
35.4146274203315
35.4670159224326
35.5194044245336
35.5717929266347
35.6241814287358
35.6765699308369
35.728958432938
35.781346935039
35.8337354371401
35.8861239392412
35.9385124413423
35.9909009434434
36.0432894455445
36.0956779476455
36.1480664497466
36.2004549518477
36.2528434539488
36.3052319560499
36.357620458151
36.410008960252
36.4623974623531
36.5147859644542
36.5671744665553
36.6195629686564
36.6719514707574
36.7243399728585
36.7767284749596
36.8291169770607
36.8815054791618
36.9338939812629
36.9862824833639
37.038670985465
37.0910594875661
37.1434479896672
37.1958364917683
37.2482249938693
37.3006134959704
37.3530019980715
37.4053905001726
37.4577790022737
37.5101675043748
37.5625560064758
37.6149445085769
37.667333010678
37.7197215127791
37.7721100148802
37.8244985169813
37.8768870190823
37.9292755211834
37.9816640232845
38.0340525253856
38.0864410274867
38.1388295295877
38.1912180316888
38.2436065337899
38.295995035891
38.3483835379921
38.4007720400932
38.4531605421942
38.5055490442953
38.5579375463964
38.6103260484975
38.6627145505986
38.7151030526996
38.7674915548007
38.8198800569018
38.8722685590029
38.924657061104
38.9770455632051
39.0294340653061
39.0818225674072
39.1342110695083
39.1865995716094
39.2389880737105
39.2913765758115
39.3437650779126
39.3961535800137
39.4485420821148
39.5009305842159
39.553319086317
39.605707588418
39.6580960905191
39.7104845926202
39.7628730947213
39.8152615968224
39.8676500989234
39.9200386010245
39.9724271031256
40.0248156052267
40.0772041073278
40.1295926094289
40.1819811115299
40.234369613631
40.2867581157321
40.3391466178332
40.3915351199343
40.4439236220354
40.4963121241364
40.5487006262375
40.6010891283386
40.6534776304397
40.7058661325408
40.7582546346419
40.8106431367429
40.863031638844
40.9154201409451
40.9678086430462
41.0201971451473
41.0725856472483
41.1249741493494
41.1773626514505
41.2297511535516
41.2821396556527
41.3345281577538
41.3869166598548
41.4393051619559
41.491693664057
41.5440821661581
41.5964706682592
41.6488591703602
41.7012476724613
41.7536361745624
41.8060246766635
41.8584131787646
41.9108016808657
41.9631901829667
42.0155786850678
42.0679671871689
42.12035568927
42.1727441913711
42.2251326934721
42.2775211955732
42.3299096976743
42.3822981997754
42.4346867018765
42.4870752039776
42.5394637060786
42.5918522081797
42.6442407102808
42.6966292123819
42.749017714483
42.801406216584
42.8537947186851
42.9061832207862
42.9585717228873
43.0109602249884
43.0633487270895
43.1157372291905
43.1681257312916
43.2205142333927
43.2729027354938
43.3252912375949
43.3776797396959
43.430068241797
43.4824567438981
43.5348452459992
43.5872337481003
43.6396222502014
43.6920107523024
43.7443992544035
43.7967877565046
43.8491762586057
43.9015647607068
43.9539532628079
44.0063417649089
44.05873026701
44.1111187691111
44.1635072712122
44.2158957733133
44.2682842754143
44.3206727775154
44.3730612796165
44.4254497817176
44.4778382838187
44.5302267859198
44.5826152880208
44.6350037901219
44.687392292223
44.7397807943241
44.7921692964252
44.8445577985262
44.8969463006273
44.9493348027284
45.0017233048295
45.0541118069306
45.1065003090317
45.1588888111327
45.2112773132338
45.2636658153349
45.316054317436
45.3684428195371
45.4208313216381
45.4732198237392
45.5256083258403
45.5779968279414
45.6303853300425
45.6827738321436
45.7351623342446
45.7875508363457
45.8399393384468
45.8923278405479
45.944716342649
45.9971048447501
46.0494933468511
46.1018818489522
46.1542703510533
46.2066588531544
46.2590473552555
46.3114358573565
46.3638243594576
46.4162128615587
46.4686013636598
46.5209898657609
46.573378367862
46.625766869963
46.6781553720641
46.7305438741652
46.7829323762663
46.8353208783674
46.8877093804685
46.9400978825695
46.9924863846706
47.0448748867717
47.0972633888728
47.1496518909739
47.2020403930749
47.254428895176
47.3068173972771
47.3592058993782
47.4115944014793
47.4639829035804
47.5163714056814
47.5687599077825
47.6211484098836
47.6735369119847
47.7259254140858
47.7783139161868
47.8307024182879
47.883090920389
47.9354794224901
47.9878679245912
48.0402564266923
48.0926449287933
48.1450334308944
48.1974219329955
48.2498104350966
48.3021989371977
48.3545874392987
48.4069759413998
48.4593644435009
48.511752945602
48.5641414477031
48.6165299498042
48.6689184519052
48.7213069540063
48.7736954561074
48.8260839582085
48.8784724603096
48.9308609624106
48.9832494645117
49.0356379666128
49.0880264687139
49.140414970815
49.1928034729161
49.2451919750171
49.2975804771182
49.3499689792193
49.4023574813204
49.4547459834215
49.5071344855226
49.5595229876236
49.6119114897247
49.6642999918258
49.7166884939269
49.769076996028
49.821465498129
49.8738540002301
49.9262425023312
49.9786310044323
50.0310195065334
50.0834080086345
50.1357965107355
50.1881850128366
50.2405735149377
50.2929620170388
50.3453505191399
50.397739021241
50.450127523342
50.5025160254431
50.5549045275442
50.6072930296453
50.6596815317464
50.7120700338474
50.7644585359485
50.8168470380496
50.8692355401507
50.9216240422518
50.9740125443529
51.0264010464539
51.078789548555
51.1311780506561
51.1835665527572
51.2359550548583
51.2883435569593
51.3407320590604
51.3931205611615
51.4455090632626
51.4978975653637
51.5502860674648
51.6026745695658
51.6550630716669
51.707451573768
51.7598400758691
51.8122285779702
51.8646170800712
51.9170055821723
51.9693940842734
52.0217825863745
52.0741710884756
52.1265595905767
52.1789480926777
52.2313365947788
52.2837250968799
52.336113598981
52.3885021010821
52.4408906031831
52.4932791052842
52.5456676073853
52.5980561094864
52.6504446115875
52.7028331136886
52.7552216157896
52.8076101178907
52.8599986199918
52.9123871220929
52.964775624194
53.017164126295
53.0695526283961
53.1219411304972
53.1743296325983
53.2267181346994
53.2791066368005
53.3314951389015
53.3838836410026
53.4362721431037
53.4886606452048
53.5410491473059
53.593437649407
53.645826151508
53.6982146536091
53.7506031557102
53.8029916578113
53.8553801599124
53.9077686620134
53.9601571641145
54.0125456662156
54.0649341683167
54.1173226704178
54.1697111725189
54.2220996746199
54.274488176721
54.3268766788221
54.3792651809232
54.4316536830243
54.4840421851253
54.5364306872264
54.5888191893275
54.6412076914286
54.6935961935297
54.7459846956308
54.7983731977318
54.8507616998329
54.903150201934
54.9555387040351
55.0079272061362
55.0603157082372
55.1127042103383
55.1650927124394
55.2174812145405
55.2698697166416
55.3222582187427
55.3746467208437
55.4270352229448
55.4794237250459
55.531812227147
55.5842007292481
55.6365892313492
55.6889777334502
55.7413662355513
55.7937547376524
55.8461432397535
55.8985317418546
55.9509202439557
56.0033087460567
56.0556972481578
56.1080857502589
56.16047425236
56.2128627544611
56.2652512565621
56.3176397586632
56.3700282607643
56.4224167628654
56.4748052649665
56.5271937670676
56.5795822691686
56.6319707712697
56.6843592733708
56.7367477754719
56.789136277573
56.841524779674
56.8939132817751
56.9463017838762
56.9986902859773
57.0510787880784
57.1034672901795
57.1558557922805
57.2082442943816
57.2606327964827
57.3130212985838
57.3654098006849
57.4177983027859
57.470186804887
57.5225753069881
57.5749638090892
57.6273523111903
57.6797408132914
57.7321293153924
57.7845178174935
57.8369063195946
57.8892948216957
57.9416833237968
57.9940718258979
58.0464603279989
58.0988488301
58.1512373322011
58.2036258343022
58.2560143364033
58.3084028385043
58.3607913406054
58.4131798427065
58.4655683448076
58.5179568469087
58.5703453490097
58.6227338511108
58.6751223532119
58.727510855313
58.7798993574141
58.8322878595152
58.8846763616162
58.9370648637173
58.9894533658184
59.0418418679195
59.0942303700206
59.1466188721216
59.1990073742227
59.2513958763238
59.3037843784249
59.356172880526
59.4085613826271
59.4609498847281
59.5133383868292
59.5657268889303
59.6181153910314
59.6705038931325
59.7228923952336
59.7752808973346
59.8276693994357
59.8800579015368
59.9324464036379
59.984834905739
60.03722340784
60.0896119099411
60.1420004120422
60.1943889141433
60.2467774162444
60.2991659183455
60.3515544204465
60.4039429225476
60.4563314246487
60.5087199267498
60.5611084288509
60.6134969309519
60.665885433053
60.7182739351541
60.7706624372552
60.8230509393563
60.8754394414574
60.9278279435584
60.9802164456595
61.0326049477606
61.0849934498617
61.1373819519628
61.1897704540639
61.2421589561649
61.294547458266
61.3469359603671
61.3993244624682
61.4517129645693
61.5041014666703
61.5564899687714
61.6088784708725
61.6612669729736
61.7136554750747
61.7660439771758
61.8184324792768
61.8708209813779
61.923209483479
61.9755979855801
62.0279864876812
62.0803749897822
62.1327634918833
62.1851519939844
62.2375404960855
62.2899289981866
62.3423175002877
62.3947060023887
62.4470945044898
62.4994830065909
62.551871508692
62.6042600107931
62.6566485128942
62.7090370149952
62.7614255170963
62.8138140191974
62.8662025212985
62.9185910233996
62.9709795255006
63.0233680276017
63.0757565297028
63.1281450318039
63.180533533905
63.2329220360061
63.2853105381071
63.3376990402082
63.3900875423093
63.4424760444104
63.4948645465115
63.5472530486126
63.5996415507136
63.6520300528147
63.7044185549158
63.7568070570169
63.809195559118
63.861584061219
63.9139725633201
63.9663610654212
64.0187495675223
64.0711380696234
64.1235265717245
64.1759150738255
64.2283035759266
64.2806920780277
64.3330805801288
64.3854690822299
64.4378575843309
64.490246086432
64.5426345885331
64.5950230906342
64.6474115927353
64.6998000948364
64.7521885969374
64.8045770990385
64.8569656011396
64.9093541032407
64.9617426053418
65.0141311074428
65.0665196095439
65.118908111645
65.1712966137461
65.2236851158472
65.2760736179482
65.3284621200493
65.3808506221504
65.4332391242515
65.4856276263526
65.5380161284537
65.5904046305547
65.6427931326558
65.6951816347569
65.747570136858
65.7999586389591
65.8523471410602
65.9047356431612
65.9571241452623
66.0095126473634
66.0619011494645
66.1142896515656
66.1666781536667
66.2190666557677
66.2714551578688
66.3238436599699
66.376232162071
66.4286206641721
66.4810091662731
66.5333976683742
66.5857861704753
66.6381746725764
66.6905631746775
66.7429516767785
66.7953401788796
66.8477286809807
66.9001171830818
66.9525056851829
67.004894187284
67.057282689385
67.1096711914861
67.1620596935872
67.2144481956883
67.2668366977894
67.3192251998905
67.3716137019915
67.4240022040926
67.4763907061937
67.5287792082948
67.5811677103959
67.6335562124969
67.685944714598
67.7383332166991
67.7907217188002
67.8431102209013
67.8954987230024
67.9478872251034
68.0002757272045
68.0526642293056
68.1050527314067
68.1574412335078
68.2098297356088
68.2622182377099
68.314606739811
68.3669952419121
68.4193837440132
68.4717722461143
68.5241607482154
68.5765492503164
68.6289377524175
68.6813262545186
68.7337147566197
68.7861032587208
68.8384917608218
68.8908802629229
68.943268765024
68.9956572671251
69.0480457692262
69.1004342713272
69.1528227734283
69.2052112755294
69.2575997776305
69.3099882797316
69.3623767818327
69.4147652839337
69.4671537860348
69.5195422881359
69.571930790237
69.6243192923381
69.6767077944392
69.7290962965402
69.7814847986413
69.8338733007424
69.8862618028435
69.9386503049446
69.9910388070456
70.0434273091467
70.0958158112478
70.1482043133489
70.20059281545
70.2529813175511
70.3053698196521
70.3577583217532
70.4101468238543
70.4625353259554
70.5149238280565
70.5673123301575
70.6197008322586
70.6720893343597
70.7244778364608
70.7768663385619
70.829254840663
70.881643342764
70.9340318448651
70.9864203469662
71.0388088490673
71.0911973511684
71.1435858532694
71.1959743553705
71.2483628574716
71.3007513595727
71.3531398616738
71.4055283637749
71.4579168658759
71.510305367977
71.5626938700781
71.6150823721792
71.6674708742803
71.7198593763814
71.7722478784824
71.8246363805835
71.8770248826846
71.9294133847857
71.9818018868868
72.0341903889878
72.0865788910889
72.13896739319
72.1913558952911
72.2437443973922
72.2961328994932
72.3485214015943
72.4009099036954
72.4532984057965
72.5056869078976
72.5580754099987
72.6104639120997
72.6628524142008
72.7152409163019
72.767629418403
72.8200179205041
72.8724064226052
72.9247949247062
72.9771834268073
73.0295719289084
73.0819604310095
73.1343489331106
73.1867374352116
73.2391259373127
73.2915144394138
73.3439029415149
73.396291443616
73.4486799457171
73.5010684478181
73.5534569499192
73.6058454520203
73.6582339541214
73.7106224562225
73.7630109583235
73.8153994604246
73.8677879625257
73.9201764646268
73.9725649667279
74.024953468829
74.07734197093
74.1297304730311
74.1821189751322
74.2345074772333
74.2868959793344
74.3392844814355
74.3916729835365
74.4440614856376
74.4964499877387
74.5488384898398
74.6012269919409
74.6536154940419
74.706003996143
74.7583924982441
74.8107810003452
74.8631695024463
74.9155580045473
74.9679465066484
75.0203350087495
75.0727235108506
75.1251120129517
75.1775005150528
75.2298890171539
75.2822775192549
75.334666021356
75.3870545234571
75.4394430255582
75.4918315276593
75.5442200297603
75.5966085318614
75.6489970339625
75.7013855360636
75.7537740381647
75.8061625402658
75.8585510423668
75.9109395444679
75.963328046569
76.0157165486701
76.0681050507712
76.1204935528722
76.1728820549733
76.2252705570744
76.2776590591755
76.3300475612766
76.3824360633777
76.4348245654787
76.4872130675798
76.5396015696809
76.591990071782
76.6443785738831
76.6967670759841
76.7491555780852
76.8015440801863
76.8539325822874
76.9063210843885
76.9587095864896
77.0110980885906
77.0634865906917
77.1158750927928
77.1682635948939
77.220652096995
77.273040599096
77.3254291011971
77.3778176032982
77.4302061053993
77.4825946075004
77.5349831096015
77.5873716117025
77.6397601138036
77.6921486159047
77.7445371180058
77.7969256201069
77.8493141222079
77.901702624309
77.9540911264101
78.0064796285112
78.0588681306123
78.1112566327134
78.1636451348144
78.2160336369155
78.2684221390166
78.3208106411177
78.3731991432188
78.4255876453199
78.4779761474209
78.530364649522
78.5827531516231
78.6351416537242
78.6875301558253
78.7399186579263
78.7923071600274
78.8446956621285
78.8970841642296
78.9494726663307
79.0018611684318
79.0542496705328
79.1066381726339
79.159026674735
79.2114151768361
79.2638036789372
79.3161921810382
79.3685806831393
79.4209691852404
79.4733576873415
79.5257461894426
79.5781346915437
79.6305231936447
79.6829116957458
79.7353001978469
79.787688699948
79.8400772020491
79.8924657041502
79.9448542062512
79.9972427083523
80.0496312104534
80.1020197125545
80.1544082146556
80.2067967167566
80.2591852188577
80.3115737209588
80.3639622230599
80.416350725161
80.468739227262
80.5211277293631
80.5735162314642
80.6259047335653
80.6782932356664
80.7306817377675
80.7830702398686
80.8354587419696
80.8878472440707
80.9402357461718
80.9926242482729
81.045012750374
81.097401252475
81.1497897545761
81.2021782566772
81.2545667587783
81.3069552608794
81.3593437629805
81.4117322650815
81.4641207671826
81.5165092692837
81.5688977713848
81.6212862734859
81.6736747755869
81.726063277688
81.7784517797891
81.8308402818902
81.8832287839913
81.9356172860924
81.9880057881934
82.0403942902945
82.0927827923956
82.1451712944967
82.1975597965978
82.2499482986989
82.3023368007999
82.354725302901
82.4071138050021
82.4595023071032
82.5118908092043
82.5642793113053
82.6166678134064
82.6690563155075
82.7214448176086
82.7738333197097
82.8262218218107
82.8786103239118
82.9309988260129
82.983387328114
83.0357758302151
83.0881643323162
83.1405528344172
83.1929413365183
83.2453298386194
83.2977183407205
83.3501068428216
83.4024953449226
83.4548838470237
83.5072723491248
83.5596608512259
83.612049353327
83.6644378554281
83.7168263575291
83.7692148596302
83.8216033617313
83.8739918638324
83.9263803659335
83.9787688680345
84.0311573701356
84.0835458722367
84.1359343743378
84.1883228764389
84.24071137854
84.293099880641
84.3454883827421
84.3978768848432
84.4502653869443
84.5026538890454
84.5550423911465
84.6074308932475
84.6598193953486
84.7122078974497
84.7645963995508
84.8169849016519
84.8693734037529
84.921761905854
84.9741504079551
85.0265389100562
85.0789274121573
85.1313159142584
85.1837044163594
85.2360929184605
85.2884814205616
85.3408699226627
85.3932584247638
85.4456469268649
85.4980354289659
85.550423931067
85.6028124331681
85.6552009352692
85.7075894373703
85.7599779394713
85.8123664415724
85.8647549436735
85.9171434457746
85.9695319478757
86.0219204499767
86.0743089520778
86.1266974541789
86.17908595628
86.2314744583811
86.2838629604822
86.3362514625832
86.3886399646843
86.4410284667854
86.4934169688865
86.5458054709876
86.5981939730887
86.6505824751897
86.7029709772908
86.7553594793919
86.807747981493
86.8601364835941
86.9125249856951
86.9649134877962
87.0173019898973
87.0696904919984
87.1220789940995
87.1744674962006
87.2268559983016
87.2792445004027
87.3316330025038
87.3840215046049
87.436410006706
87.4887985088071
87.5411870109081
87.5935755130092
87.6459640151103
87.6983525172114
87.7507410193125
87.8031295214136
87.8555180235146
87.9079065256157
87.9602950277168
88.0126835298179
88.065072031919
88.11746053402
88.1698490361211
88.2222375382222
88.2746260403233
88.3270145424244
88.3794030445254
88.4317915466265
88.4841800487276
88.5365685508287
88.5889570529298
88.6413455550309
88.6937340571319
88.746122559233
88.7985110613341
88.8508995634352
88.9032880655363
88.9556765676374
89.0080650697384
89.0604535718395
89.1128420739406
89.1652305760417
89.2176190781428
89.2700075802438
89.3223960823449
89.374784584446
89.4271730865471
89.4795615886482
89.5319500907492
89.5843385928503
89.6367270949514
89.6891155970525
89.7415040991536
89.7938926012547
89.8462811033557
89.8986696054568
89.9510581075579
90.003446609659
90.0558351117601
90.1082236138612
90.1606121159622
90.2130006180633
90.2653891201644
90.3177776222655
90.3701661243666
90.4225546264676
90.4749431285687
90.5273316306698
90.5797201327709
90.632108634872
90.6844971369731
90.7368856390741
90.7892741411752
90.8416626432763
90.8940511453774
90.9464396474785
90.9988281495796
91.0512166516806
91.1036051537817
91.1559936558828
91.2083821579839
91.260770660085
91.313159162186
91.3655476642871
91.4179361663882
91.4703246684893
91.5227131705904
91.5751016726914
91.6274901747925
91.6798786768936
91.7322671789947
91.7846556810958
91.8370441831969
91.8894326852979
91.941821187399
91.9942096895001
92.0465981916012
92.0989866937023
92.1513751958034
92.2037636979044
92.2561522000055
92.3085407021066
92.3609292042077
92.4133177063088
92.4657062084098
92.5180947105109
92.570483212612
92.6228717147131
92.6752602168142
92.7276487189153
92.7800372210163
92.8324257231174
92.8848142252185
92.9372027273196
92.9895912294207
93.0419797315217
93.0943682336228
93.1467567357239
93.199145237825
93.2515337399261
93.3039222420272
93.3563107441283
93.4086992462293
93.4610877483304
93.5134762504315
93.5658647525326
93.6182532546337
93.6706417567347
93.7230302588358
93.7754187609369
93.827807263038
93.8801957651391
93.9325842672401
93.9849727693412
94.0373612714423
94.0897497735434
94.1421382756445
94.1945267777456
94.2469152798466
94.2993037819477
94.3516922840488
94.4040807861499
94.456469288251
94.5088577903521
94.5612462924531
94.6136347945542
94.6660232966553
94.7184117987564
94.7708003008575
94.8231888029585
94.8755773050596
94.9279658071607
94.9803543092618
95.0327428113629
95.085131313464
95.137519815565
95.1899083176661
95.2422968197672
95.2946853218683
95.3470738239694
95.3994623260704
95.4518508281715
95.5042393302726
95.5566278323737
95.6090163344748
95.6614048365759
95.7137933386769
95.766181840778
95.8185703428791
95.8709588449802
95.9233473470813
95.9757358491823
96.0281243512834
96.0805128533845
96.1329013554856
96.1852898575867
96.2376783596877
96.2900668617888
96.3424553638899
96.394843865991
96.4472323680921
96.4996208701932
96.5520093722943
96.6043978743953
96.6567863764964
96.7091748785975
96.7615633806986
96.8139518827997
96.8663403849007
96.9187288870018
96.9711173891029
97.023505891204
97.0758943933051
97.1282828954061
97.1806713975072
97.2330598996083
97.2854484017094
97.3378369038105
97.3902254059116
97.4426139080126
97.4950024101137
97.5473909122148
97.5997794143159
97.652167916417
97.7045564185181
97.7569449206191
97.8093334227202
97.8617219248213
97.9141104269224
97.9664989290235
98.0188874311245
98.0712759332256
98.1236644353267
98.1760529374278
98.2284414395289
98.28082994163
98.333218443731
98.3856069458321
98.4379954479332
98.4903839500343
98.5427724521354
98.5951609542364
98.6475494563375
98.6999379584386
98.7523264605397
98.8047149626408
98.8571034647419

Radius_Low_NoLoss
100	100	100	100	100	100	100	100	100	100
99.9999933719717	99.9999933050219	99.9999930958039	99.9999927164524	99.99999210949	99.9999911626287	99.9999896437054	99.9999870038652	99.999981588808	99.9999651156303
99.9999798954887	99.9999796924186	99.9999790578254	99.9999779071922	99.9999760661868	99.9999731942376	99.9999685872008	99.9999605804609	99.9999441569436	99.9998941995435
99.9999593431323	99.9999589324805	99.9999576491961	99.9999553223736	99.999951599489	99.9999457918666	99.9999364756715	99.9999202850177	99.999887076003	99.9997860671667
99.9999314802805	99.9999307882223	99.9999286255453	99.9999247042375	99.9999184302248	99.9999086429629	99.9998929430742	99.9998656587343	99.9998096979631	99.9996394957504
99.9998968241639	99.999895782106	99.9998925256829	99.9998866212392	99.9998771742916	99.9998624374563	99.9998387981654	99.9997977171353	99.9997134635982	99.9994572195401
99.9998543919217	99.9998529213498	99.9998483258226	99.9998399933782	99.9998266617546	99.9998058651383	99.9997725057825	99.9997145343737	99.9995956466924	99.9992340760153
99.9998039268544	99.9998019466692	99.9997957585997	99.9997845386428	99.9997665871772	99.9997385840566	99.9996936654786	99.9996156086754	99.9994555386336	99.9989687260977
99.9997451641793	99.999742590615	99.9997345482309	99.9997199661418	99.9996966355067	99.9996602414954	99.9996018642139	99.9995004225289	99.9992924085643	99.9986597882192
99.9996778307886	99.9996745773294	99.9996644102624	99.9996459758386	99.9996164817859	99.9995704736534	99.999496675979	99.999368442211	99.9991055026877	99.9983058370935
99.9996025380139	99.9995985243282	99.9995859815327	99.9995632396121	99.9995268539695	99.999470095999	99.9993790567451	99.9992208683121	99.9988965241727	99.9979101025905
99.9995181328075	99.9995132669256	99.9994980609835	99.9994704904569	99.9994263795495	99.9993575714741	99.9992472056117	99.9990554418113	99.9986622748906	99.9974665266906
99.9994243165607	99.9994185035065	99.9994003376015	99.9993674003233	99.9993147032315	99.9992325023236	99.9991006568496	99.9988715793079	99.9984019306362	99.9969735504464
99.9993207813311	99.9993139230284	99.9992924906524	99.9992536309082	99.9991914586172	99.9990944783646	99.9989389301925	99.9986686792069	99.9981146414471	99.9964295659767
99.9992072095647	99.9991992047405	99.9991741893913	99.9991288333504	99.9990562678743	99.9989430766181	99.998761530404	99.9984461211748	99.997799530828	99.9958329150284
99.9990843229159	99.9990750775982	99.9990461855841	99.9989938007802	99.9989099903331	99.9987792597388	99.998569586067	99.9982053226643	99.9974586091767	99.9951874092836
99.9989507701927	99.9989401767719	99.9989070717789	99.9988470484675	99.998751017635	99.9986012265602	99.9983609869011	99.9979436366335	99.9970881286304	99.9944859486092
99.998806204418	99.9987941517921	99.9987564865863	99.9986881952291	99.9985789369449	99.9984085149309	99.9981351918442	99.9976603853666	99.9966871313732	99.9937267207128
99.9986502678482	99.9986366413143	99.9985940574039	99.9985168480545	99.9983933226199	99.9982006483663	99.9978916430649	99.9973548701419	99.996254629865	99.9929078568892
99.9984825916553	99.9984672727984	99.9984194000845	99.998332601757	99.9981937358307	99.9979771356252	99.9976297654663	99.9970263706097	99.9957896059564	99.9920274303641
99.9983040266784	99.9982869056918	99.9982334009702	99.9981363914493	99.9979811897469	99.9977391117202	99.9973508897516	99.996676558064	99.995294429726	99.9910899343313
99.9981129912815	99.9980939423959	99.9980344125709	99.9979264791849	99.9977538017135	99.9974844683276	99.9970525458185	99.9963023340916	99.9947647138851	99.9900870567211
99.9979090827238	99.9978879761164	99.9978220154189	99.997702422523	99.997511092559	99.99721266906	99.9967341057456	99.9959029121591	99.9941993465343	99.9890166932475
99.9976918858582	99.9976685875286	99.9975957771256	99.9974637653948	99.9972525683535	99.9969231610145	99.9963949222858	99.9954774815156	99.9935971815193	99.9878766746188
99.99746236892	99.9974367546642	99.9973567063287	99.9972115719396	99.9969793820688	99.9966172358367	99.9960365098103	99.9950279440877	99.992960915757	99.9866721134389
99.9972187414181	99.9971906689617	99.9971029379874	99.9969438747162	99.9966894024514	99.9962925068224	99.9956560720905	99.994550792325	99.9922855823934	99.9853935991771
99.9969605502653	99.9969298727745	99.9968340001978	99.9966601759778	99.996382090439	99.9959483705617	99.9952529027733	99.9940451414067	99.9915699303923	99.984038763907
99.9966873284982	99.9966538944404	99.9965494066043	99.996359962735	99.9960568904626	99.9955842051726	99.9948262738866	99.993510079417	99.9908126704023	99.9826051669744
99.9963985948734	99.9963622478734	99.9962486559779	99.9960427063109	99.9957132299659	99.9951993697623	99.9943754352083	99.9929446665563	99.9900124736294	99.9810902928848
99.996095488479	99.9960560836874	99.99593293494	99.9957096586247	99.9953524653837	99.9947953839331	99.9939021683929	99.9923511403594	99.9891725126709	99.9795001556537
99.9957759175585	99.9957332890151	99.9956000646406	99.9953585211969	99.9949721068681	99.9943694594225	99.9934032067615	99.9917254030566	99.9882869846347	99.9778237599928
99.9954393572205	99.9953933336839	99.9952494983915	99.9949887174036	99.9945715299411	99.9939208972321	99.9928777320833	99.9910664296132	99.9873544400367	99.9760583618261
99.9950852666145	99.9950356714011	99.9948806728823	99.9945996530894	99.9941500911403	99.9934489771173	99.9923249012583	99.9903731638248	99.9863733853162	99.9742011333957
99.9947130884689	99.9946597392885	99.9944930077005	99.9941907160602	99.9937071274696	99.9929529569725	99.9917438455976	99.9896445174154	99.9853422815487	99.9722491608459
99.9943241612792	99.9942668893851	99.9940878971966	99.9937633773981	99.9932442328323	99.9924346224523	99.9911366586908	99.9888831195862	99.9842648564874	99.9702095102459
99.9939160439524	99.9938546559618	99.9936627986391	99.9933149547637	99.9927585015657	99.9918907196541	99.9904995283125	99.9880841881148	99.9831343377066	99.9680693483045
99.993488129055	99.9934224254736	99.9932170793709	99.9928447808593	99.9922492110026	99.9913204396915	99.9898315076017	99.9872465367472	99.9819490475462	99.9658254983309
99.9930397908163	99.992969565854	99.9927500876365	99.9923521682442	99.9917156166629	99.9907229492651	99.9891316211195	99.9863689434089	99.9807072576926	99.9634746874284
99.9925703846027	99.9924954259838	99.9922611520345	99.9918364087563	99.9911569516273	99.9900973899622	99.9883988640273	99.9854501491766	99.9794071877096	99.9610135437342
99.9920814813743	99.9920015927197	99.9917519090824	99.9912992289737	99.9905750866359	99.9894458575923	99.9876356935458	99.9844932398232	99.9780532125215	99.9584503597347
99.9915702353821	99.9914851915922	99.9912193945427	99.9907375019081	99.9899666343595	99.9887645588618	99.9868376654764	99.9834926402213	99.9766374365075	99.9557701725043
99.9910359444011	99.9909455133116	99.9906628770319	99.9901504561325	99.9893307593696	99.9880525586819	99.9860036852176	99.9824469789362	99.9751579199049	99.9529693082114
99.9904778851592	99.9903818273294	99.9900816032451	99.9895372970991	99.9886666012	99.987308893941	99.9851326253613	99.9813548434093	99.9736126647939	99.9500439825124
99.9898978390291	99.9897959330444	99.9894774288946	99.9888999826465	99.9879762811672	99.9865359411798	99.984227272256	99.9802197326621	99.9720066318478	99.9470035979832
99.989292594873	99.9891845869103	99.9888470091387	99.9882349842835	99.9872559770112	99.9857294200437	99.9832826110281	99.9790353555499	99.9703309111081	99.9438312682008
99.9886613651859	99.9885469934998	99.9881895237732	99.9875414369012	99.9865047518546	99.9848882818977	99.9822974141426	99.9778001740036	99.9685833269294	99.9405228717728
99.9880033389938	99.9878823336803	99.9875041281503	99.9868184496094	99.9857216409004	99.9840114468572	99.9812704174775	99.9765126040899	99.966761638803	99.9370741639811
99.9873176811881	99.9871897639421	99.9867899524856	99.9860651050052	99.9849056506404	99.9830978029012	99.9802003192854	99.9751710147118	99.9648635394953	99.9334807732827
99.9866064781881	99.9864713918176	99.9860491702691	99.9852836961971	99.9840592656633	99.9821501335542	99.9790903830517	99.9737795039764	99.9628948388899	99.9297537114051
99.9858659935728	99.9857234431755	99.9852778895014	99.9844701174898	99.9831780384436	99.9811634582405	99.9779347734538	99.972330751308	99.9608451686442	99.9258733256879
99.9850953186189	99.9849450001505	99.9844751637262	99.9836233706118	99.9822608878977	99.9801365669154	99.9767320739745	99.9708229817371	99.9587120177356	99.9218348579478
99.9842935177117	99.9841351177159	99.9836400184798	99.9827424277505	99.9813067009504	99.9790682137252	99.9754808261687	99.9692543677305	99.9564928007873	99.9176334085458
99.9834596275891	99.9832928229191	99.9827714505026	99.9818262307208	99.9803143316343	99.9779571159983	99.9741795284819	99.9676230277124	99.9541848559489	99.913263932395
99.9825960891687	99.9824205813789	99.9818720025787	99.9808774622529	99.9792866867003	99.9768065302141	99.9728319988728	99.965933755979	99.9517949799304	99.9087393111531
99.9816985592881	99.9815140060974	99.9809371506974	99.9798913499312	99.97821859638	99.9756106669572	99.9714314542755	99.9641780427597	99.9493111195155	99.9040366955336
99.9807659903985	99.9805720389874	99.9799658038118	99.9788667429768	99.9771088144304	99.9743681313111	99.9699762617057	99.9623538417063	99.9467303794041	99.8991505972324
99.9797973041689	99.9795935908698	99.9789568388143	99.9778024567943	99.9759560579857	99.9730774873641	99.9684647401756	99.9604590462836	99.9440497791391	99.8940753658099
99.9787913906256	99.9785775406047	99.9779090996404	99.9766972720269	99.9747590065338	99.9717372570628	99.9668951593505	99.9584914880877	99.9412662506947	99.8888051841407
99.9777511021996	99.9775267694888	99.9768255577631	99.9755543236897	99.973521056883	99.9703512459008	99.9652719808261	99.9564567695521	99.9383877362778	99.8833551044271
99.9766713955892	99.9764361833166	99.9757009598693	99.9743680700078	99.9722362058249	99.9689127310745	99.9635873278229	99.9543450084876	99.9354002380085	99.8776985867441
99.9755510644067	99.9753045635637	99.9745340494753	99.9731371857047	99.9709030181367	99.9674201061204	99.9618393196367	99.9521538479504	99.9323004206638	99.8718293062506
99.974388867061	99.9741306561481	99.973323533431	99.971860306829	99.9695200167101	99.965871717686	99.9600260206541	99.9498808621421	99.9290848515738	99.8657407523959
99.9731835257804	99.9729131704431	99.9720680809029	99.9705360296815	99.9680856813881	99.9642658642274	99.9581454388261	99.9475235544986	99.9257499978781	99.859426223734
99.971938370172	99.9716554697512	99.970771160456	99.9691680137312	99.9666039772305	99.9626069878489	99.956202782074	99.9450884645196	99.9223051300171	99.8529032892015
99.9706475498092	99.970351644592	99.9694266780286	99.9677498302682	99.965067940207	99.9608872896761	99.9541889126709	99.9425641276576	99.9187340077066	99.8461411516369
99.9693096767355	99.969000293045	99.9680331880232	99.9662799545412	99.9634759190569	99.9591049213952	99.9521016666833	99.9399478318003	99.915032792513	99.8391325283772
99.9679233227716	99.967599972562	99.9665892029481	99.9647568176083	99.9618262146584	99.9572579811102	99.9499388174248	99.9372367861331	99.9111975345816	99.8318699241853
99.9664922473658	99.9661544806369	99.9650986391501	99.9631845513678	99.9601233039522	99.9553514843833	99.9477062451046	99.9344383742549	99.907238700759	99.8243731750788
99.965009874526	99.9646571748969	99.9635546467714	99.9615559297878	99.9583593591521	99.9533766649563	99.945393678368	99.9315397089418	99.9031380343671	99.8166076544033
99.9634746536242	99.9631064891121	99.9619556107814	99.9598692493968	99.9565325354305	99.9513314578079	99.9429986994743	99.9285377597525	99.8988912457938	99.8085652199362
99.9618849893416	99.9615008119117	99.9602998696002	99.9581227576222	99.9546409347781	99.9492137383747	99.9405188209435	99.9254294087687	99.8944939215533	99.8002374928585
99.9602392404423	99.9598384855454	99.958585713822	99.9563146514429	99.952682604544	99.9470213209168	99.9379514836399	99.922211448193	99.8899415208306	99.7916158512022
99.9585417866606	99.958123934071	99.9568177059687	99.9544497444981	99.9506627603389	99.9447600485193	99.9353035379028	99.918892479678	99.8852462369997	99.7827234021054
99.9567850131225	99.9563494657412	99.9549879140081	99.952519669112	99.9485723375884	99.942419769717	99.9325630890581	99.9154575786405	99.8803869254441	99.7735200315522
99.9549671388804	99.9545132816864	99.9530944830119	99.9505224687599	99.9464092173775	99.9399981126136	99.9297273599163	99.911903263745	99.8753586572811	99.7639963777492
99.9530863320046	99.9526135315416	99.951135504949	99.9484561309012	99.944171220117	99.9374926373774	99.9267934937079	99.9082259538142	99.8701563621734	99.7541428083578
99.951140708195	99.9506483120436	99.9491090172389	99.946318585453	99.9418561038902	99.9349008343878	99.9237585519103	99.9044219651037	99.8647748244054	99.7439494130263
99.9491353643051	99.9486227716276	99.9470203294533	99.9441154342221	99.9394699382885	99.9322295034309	99.920630506428	99.9005013074517	99.8592282333082	99.7334430805273
99.9470614910126	99.9465280120308	99.9448602653249	99.9418369969051	99.9370022366858	99.9294669002863	99.9173955959462	99.8964467133254	99.853492122507	99.7225773817351
99.9449170447456	99.9443619691131	99.9426266963738	99.9394810284148	99.9344505676019	99.9266103030725	99.914050633277	99.8922541869655	99.8475608333914	99.7113415606549
99.9426999238246	99.9421225200409	99.9403174335933	99.9370452198147	99.9318124303935	99.9236569124599	99.9105923404962	99.8879196187444	99.8414285459379	99.6997245520556
99.9404079668891	99.9398074816977	99.9379302258113	99.9345271965896	99.9290852533803	99.920603849571	99.9070173464805	99.8834387820759	99.8350892742532	99.6877149729579
99.938047098996	99.9374228391045	99.9354712453693	99.9319334708025	99.9262760924162	99.9174590190819	99.9033349184213	99.8788233130892	99.8285595127362	99.6753440793658
99.9356071387798	99.934958308091	99.9329298867527	99.9292528543173	99.9233728273055	99.9142088470395	99.8995291505069	99.8740532522615	99.8218109775676	99.6625581799384
99.9330857434635	99.9324115222948	99.930303709818	99.9264827732685	99.920372670419	99.9108502127353	99.8955963882614	99.8691240173648	99.8148371777232	99.6493449254635
99.930480504095	99.9297800485105	99.9275902054899	99.9236205810713	99.9172727553506	99.9073799072386	99.8915328738323	99.8640308963999	99.8076314381087	99.6356916133903
99.9277980890768	99.9270706226284	99.9247963204807	99.9206736067805	99.9140810231647	99.9038068269089	99.887349036983	99.8587869851452	99.800212321907	99.6216334195553
99.9250270877308	99.9242717187399	99.9219101686951	99.9176293112471	99.9107838899559	99.9001157582527	99.8830270501942	99.8533699114768	99.7925481232199	99.6071101382362
99.9221648900166	99.9213807005224	99.9189290315902	99.9144848269061	99.9073782499238	99.8963032242278	99.8785628414204	99.8477745689312	99.7846316064641	99.5921079926944
99.9192088125551	99.918394857574	99.9158501142267	99.9112372055952	99.9038609099523	99.8923656499968	99.8739522240038	99.8419957071291	99.7764553318206	99.5766128133937
99.916156096665	99.9153114034308	99.9126705432241	99.9078834163971	99.9002285872693	99.8882993603036	99.8691908935943	99.8360279279071	99.7680116496338	99.5606100272331
99.9130144797153	99.912138153768	99.9093983788755	99.9044319632367	99.8964904959074	99.8841146775837	99.8642909517651	99.829886426052	99.7593220982101	99.5441404463869
99.9097707961078	99.9088618100137	99.9060199069545	99.900868378252	99.8926309623017	99.8797940475555	99.8592318271601	99.8235453842914	99.7503500838789	99.5271345529683
99.9064220584453	99.9054793546776	99.9025320158243	99.8971893791607	99.8886464313455	99.8753334899189	99.8540088578784	99.8169989554052	99.7410873183161	99.5095765471504
99.9029651959291	99.9019876860251	99.8989315069662	99.8933915920163	99.8845332486175	99.8707289131237	99.8486172516092	99.8102411283546	99.7315252805107	99.491450180475
99.8993970521398	99.8983836158359	99.8952150926676	99.8894715487671	99.8802876577347	99.8659761114014	99.8430520821444	99.8032657238994	99.7216552104099	99.4727387435596
99.8957265954777	99.8946762032758	99.8913921156322	99.8854391063293	99.8759203386908	99.8610870494661	99.8373273763223	99.796090354055	99.7115020723812	99.4534895394047
99.8919386495306	99.8908501186202	99.8874467668976	99.8812775868049	99.8714132233741	99.8560414905677	99.8314194181495	99.7886852525291	99.7010236682153	99.4336223618356
99.8880297979374	99.8869019110782	99.8833754879547	99.8769832364285	99.8667622458217	99.8508348821202	99.8253228748017	99.7810437291728	99.6902105105268	99.4131191005633
99.8839965295632	99.8828280341267	99.879174621561	99.87255219726	99.8619632271891	99.8454625450694	99.8190322651657	99.7731589074715	99.6790528469603	99.3919611329004
99.8798352359923	99.8786248429776	99.874840409128	99.8679805044261	99.8570118727579	99.839919670536	99.8125419558941	99.7650237195807	99.667540652976	99.3701293097147
99.8755563018754	99.8743028273814	99.8703836687192	99.8632795714033	99.8519205490489	99.8342201126071	99.8058681887605	99.756658558424	99.6557028344419	99.3476784014005
99.8711422487627	99.8698443322801	99.865786193213	99.8584301900647	99.8466684463629	99.8283405630909	99.7989836467624	99.7480291347365	99.6434907715839	99.3245159411153
99.8665891730229	99.8652454146812	99.8610439164614	99.8534280710115	99.8412509183065	99.8222758190606	99.7918822344258	99.7391277997121	99.6308936119023	99.3006211797964
99.8618930634057	99.8605020228829	99.8561526601949	99.8482688065344	99.8356631902721	99.8160205339148	99.7845576877606	99.7299466926417	99.6179002012797	99.2759727830855
99.8570655712879	99.8556259261827	99.8511245620731	99.842965202335	99.8299191372529	99.8095902516472	99.7770282296446	99.7205086937643	99.6045429708362	99.2506322007453
99.8520871620574	99.8505973925433	99.8459392729136	99.8374957901973	99.8239955005583	99.8029589202342	99.7692633257992	99.7107754720077	99.5907675599723	99.2244959918002
99.8469534979749	99.8454120404644	99.84059227429	99.8318558034669	99.8178871165647	99.796120757114	99.7612562008144	99.7007385234093	99.5765618970946	99.1975410432332
99.8416601222959	99.8400653682341	99.8350789237856	99.8260403446462	99.8115886798359	99.7890698207848	99.7529998928052	99.6903891094033	99.5619135763641	99.1697435912857
99.8362024561531	99.8345527507782	99.8293944517432	99.8200443819619	99.805094739398	99.7818000066224	99.7444872484895	99.6797182506124	99.5468098486203	99.1410792035619
99.8305939664983	99.8288877913459	99.8235528871754	99.813882716566	99.79842133231	99.7743292807304	99.7357393302154	99.6687523922972	99.5312881979985	99.1116189027464
99.8248121915279	99.8230478010561	99.8175308313536	99.8075306625663	99.7915417130942	99.7666276842143	99.7267210221425	99.6574474464425	99.5152860835711	99.081243588382
99.8188521820322	99.8170277807324	99.8113231287477	99.8009827809637	99.7844499893682	99.7586886176547	99.7174245903245	99.6457937028486	99.4987897121566	99.0499267958565
99.812708853827	99.8108225948531	99.8049244831888	99.7942334843326	99.7771401078528	99.7505053012578	99.7078420891065	99.6337811847758	99.4817849102416	99.0176413168068
99.8063769842346	99.8044269679948	99.7983294542001	99.7872770329443	99.7696058501649	99.7420707701281	99.6979653555565	99.6213996419103	99.4642571136693	98.9843591785719
99.7998721232572	99.7978566075408	99.7915542407881	99.7801305173811	99.7618657339593	99.7334057693276	99.6878187098424	99.6086796098082	99.4462496040054	98.9501623876556
99.7931684656808	99.791085447308	99.7845719609608	99.7727655762989	99.7538890306564	99.7244758765362	99.6773618010569	99.5955704205188	99.4276904850733	98.9149139035307
99.7862603690006	99.7841077877757	99.7773767367729	99.7651760082414	99.7456690212975	99.7152735655838	99.6665858072914	99.5820609936816	99.4085640049751	98.8785834301663
99.7791420377168	99.7769177748703	99.76996253085	99.7573554434748	99.7371988044749	99.7057911057043	99.6554816663852	99.5681399462065	99.3888539790984	98.8411398209165
99.7718075193636	99.7695093959541	99.7623231422478	99.7492973396121	99.7284712915797	99.6960205561929	99.6440400696256	99.5537955843014	99.3685437783855	98.802551054884
99.7642747515935	99.7619007702281	99.7544772572834	99.7410214114527	99.7195078436119	99.6859858474621	99.6322890714398	99.5390631320275	99.3476833297765	98.7629117292923
99.7565141133741	99.7540619769794	99.7463940184003	99.7324951025437	99.7102731854007	99.6756474617399	99.6201823434573	99.5238844059475	99.3261900445577	98.7220642569563
99.7485191765851	99.7459865230661	99.7380667289652	99.7237113472544	99.7007596609523	99.6649968219304	99.6077098294055	99.5082467697737	99.3040459424592	98.6799739586327
99.7402833397797	99.737667740251	99.7294885117121	99.7146628892694	99.6909594074848	99.6540251189688	99.5948612004669	99.4921372434652	99.2812325508834	98.6366051814005
99.7317998237047	99.7290987806756	99.7206523040682	99.7053422766492	99.6808643500609	99.6427233057833	99.5816258481497	99.4755424941865	99.2577308915439	98.591921271396
99.7230893002275	99.7203005254326	99.7115796406972	99.6957722293254	99.6704991057605	99.6311189605354	99.5680361032502	99.458503115191	99.2335985016834	98.5460312451952
99.7141177966473	99.7112386579521	99.70223513002	99.6859154061854	99.6598232134352	99.619166752658	99.5540388169631	99.4409523444745	99.2087405781604	98.4987539884274
99.7048779950807	99.7019057862394	99.6926111480863	99.6757637626164	99.6488279553224	99.6068569138014	99.5396225330069	99.4228757792003	99.1831366053082	98.4500498024426
99.6953623813818	99.692294320029	99.6826998663859	99.6653090380291	99.6375043793838	99.5941794127089	99.5247754860083	99.4042586262456	99.1567655072044	98.3998778727827
99.6855940627487	99.6824276003977	99.6725253565758	99.654576629005	99.6258800028822	99.5811650766098	99.5095338157843	99.38514626131	99.1296915996289	98.3483600607167
99.6755351933493	99.6722673982762	99.6620481914798	99.6435249355113	99.6139097481149	99.5677633996644	99.4938382997559	99.3654642798888	99.1018091887405	98.2952942217296
99.6651776646289	99.6618055228999	99.6512599230147	99.6321450427566	99.6015839533285	99.5539635540135	99.4776762357046	99.3451967052865	99.0730954949958	98.2406361459827
99.6545131514572	99.6510335647076	99.6401518773427	99.6204277975609	99.5888926981237	99.5397544214389	99.4610345798459	99.3243271290795	99.0435271178627	98.1843403788375
99.6435331065649	99.6399428897184	99.6287151490645	99.6083638022144	99.5758257967765	99.525124585835	99.4438999379174	99.3028386997647	99.0130800188678	98.1263601853399
99.6322641138651	99.6285603509216	99.6169774316949	99.5959822745445	99.5624149069343	99.5101095129207	99.4263138876753	99.2807836208087	98.9818281922029	98.0668357644716
99.6206628307083	99.6168421664991	99.6048935704141	99.5832355695508	99.5486083976772	99.4946513494212	99.4082085813748	99.258076630268	98.9496504587335	98.005534985072
99.608720037232	99.6047790229629	99.5924539586569	99.570113549024	99.5343952796951	99.4787377768252	99.3895695626413	99.2346995330007	98.916520840143	97.942407213323
99.5964262685154	99.592361359244	99.579648734375	99.5566058049194	99.5197642708171	99.4623561476828	99.370381987832	99.2106336436649	98.8824126508672	97.8774003849155
99.5837718083	99.5795793603466	99.5664677734819	99.5427016524204	99.5047037884621	99.4454934770881	99.350630615934	99.1858597738082	98.8472984787091	97.8104609636326
99.5707872116606	99.5664638906276	99.5529429064539	99.5284346740826	99.4892502195708	99.4281905290625	99.3303632362697	99.1604379262057	98.8112633735328	97.7417500966293
99.5574228796064	99.5529648481809	99.5390224590357	99.5137503437369	99.4733444725561	99.410381083814	99.309502176499	99.13427046473	98.7741684870415	97.6710013132527
99.5436683350638	99.5390716493441	99.5246955138759	99.4986371386134	99.4569740551673	99.3920511343253	99.2880309915132	99.1073366752396	98.7359841970838	97.5981565911177
99.5295128237538	99.5247734303843	99.5099508645753	99.4830832305848	99.4401261436148	99.3731863009781	99.2659327971113	99.0796152868611	98.6966800754971	97.5231562604349
99.5149453071028	99.5100590403327	99.4947770082842	99.4670764783285	99.4227875740321	99.3537718219068	99.2431902585362	99.0510844572876	98.6562248658757	97.4459389554883
99.5000008720632	99.4949639213126	99.4792104965889	99.4506554454691	99.4050001305239	99.333854507742	99.2198582541001	99.0218130905219	98.6147162362061	97.3666897318092
99.4846228034327	99.4794307825833	99.4631922392797	99.4337577776951	99.3866962328782	99.3133586172371	99.1958479265461	98.991689453828	98.5719951825948	97.2851027812459
99.4687992022347	99.4634476038545	99.4467098362377	99.4163703856221	99.3678616875991	99.2922682308756	99.1711405759176	98.9606899718881	98.5280279288728	97.2011115636635
99.4525178559888	99.4470020480766	99.4297505603827	99.398479834361	99.3484819258994	99.2705670070802	99.1457170043308	98.9287904368354	98.4827797794548	97.1146476368531
99.4358178755232	99.4301336219981	99.4123551552189	99.380129110306	99.3286035241634	99.2483071255046	99.1196383848226	98.8960676567531	98.436359606903	97.0259172865407
99.4186362270117	99.4127786516636	99.3944579453057	99.3612489072316	99.3081513625512	99.2254043858712	99.0928059193812	98.8623973616982	98.3885904555708	96.9345795107594
99.4009597492719	99.3949238414477	99.3760452140425	99.3418247444688	99.2871097360944	99.2018411684006	99.0651989013218	98.827753425263	98.3394348313443	96.8405600584272
99.3827749354317	99.3765555464311	99.3571028842364	99.3218417602113	99.2654625256657	99.1775993872535	99.0367960735748	98.7921090206297	98.2888542184737	96.7437825413505
99.3640679241022	99.3576597634766	99.337616508876	99.3012847017382	99.2431931873079	99.1526604784416	99.0075756142548	98.7554366019213	98.2368090509098	96.6441683688207
99.3448835537801	99.3382817850131	99.3176327983609	99.2802028509848	99.2203551189937	99.1270842642875	98.9776076569543	98.7178242290698	98.1834241531526	96.5419540444888
99.3251498411869	99.3183488959847	99.2970767494889	99.2585170535561	99.1968625183875	99.1007745562643	98.9467793096008	98.6791298438638	98.1284970605782	96.4367483080622
99.3048518522534	99.2978460093464	99.2759327961439	99.2362108736041	99.172697555443	99.0737113423209	98.9150670386852	98.6393237188905	98.0719850089122	96.3284658317672
99.2839742620024	99.276757643045	99.2541849643461	99.2132674440283	99.1478419312342	99.0458740823039	98.8824466861611	98.5983753299907	98.0138440656721	96.2170188057726
99.2625013445632	99.255067909923	99.2318168618092	99.1896694554	99.1222768658535	99.0172416942218	98.8488934529975	98.5562533348894	97.9540290970163	96.1023168601484
99.2404844590266	99.2328286890583	99.2088819919241	99.1654733568635	99.0960635234843	98.9878827015733	98.814487674677	98.5130586046459	97.8926830902593	95.9846308971002
99.2178414588923	99.209956997853	99.1852947576146	99.1405888076009	99.0691039650496	98.9576872909745	98.7791004322275	98.4686288338818	97.8295744868029	95.8635119618951
99.1945554053647	99.1864357234463	99.1610375008224	99.1149971594842	99.0413779545449	98.9266327393686	98.7427049838421	98.4229301974004	97.7646544921829	95.738861839421
99.1706089175649	99.1622473062257	99.1360921020954	99.0886792763369	99.0128647249918	98.8946957250538	98.705273878595	98.3759279627615	97.6978729738273	95.6105794196774
99.145984161222	99.1373737283911	99.1104399687537	99.0616155213711	98.9835429646922	98.861852312049	98.6667789376573	98.3275864657283	97.6291784225341	95.4785606039105
99.1207399124928	99.1118743612395	99.08414233117	99.03387049648	98.9534826721036	98.8281809219205	98.6273121021063	98.2780211517717	97.5587344888781	95.3431154115306
99.094782488826	99.0856545673931	99.0571015660433	99.0053411599922	98.9225721249018	98.793556262016	98.5867262332568	98.227046672518	97.4862764254238	95.2037285703115
99.0680926841935	99.0586949427354	99.0292976487099	98.9760063599641	98.8907883621933	98.7579525355968	98.5449909454684	98.1746245344866	97.4117485247413	95.06028680283
99.040650792495	99.0309755777556	99.0007100324142	98.9458443919427	98.8581078215339	98.7213432669186	98.5020750472791	98.1207152098325	97.3350935433962	94.9126734384798
99.012522156127	99.0025624765377	98.9714067881984	98.9149270755114	98.8246083225781	98.6838156407756	98.4580807550827	98.0654470482309	97.2564934266477	94.7612331094587
98.984387767249	98.9741435586843	98.942097489355	98.8840032705191	98.7911016493481	98.6462797636931	98.4140763077567	98.010164305435	97.1778633833294	94.6096588710911
98.956250388993	98.9457216162356	98.9127850174382	98.8530760212638	98.7575911080485	98.6087393533613	98.3700660865293	97.9548725127398	97.0992112554185	94.4579651549366
98.9281100208774	98.917296649425	98.8834693739743	98.8221453319312	98.7240767083484	98.5711944300812	98.3260501293026	97.8995717232613	97.0205370011947	94.3061510209698
98.8999666624528	98.8888686585158	98.8541505605405	98.7912112068023	98.6905584600885	98.5336450143911	98.2820284738677	97.8442619853665	96.9418405490223	94.1542155865334
98.8718203133019	98.8604376438016	98.8248285787666	98.7602736502555	98.6570363732805	98.4960911270525	98.2380011577468	97.7889433418005	96.8631218061958	94.0021580134611
98.8436709730395	98.8320036056072	98.7955034303349	98.7293326667668	98.6235104581068	98.458532789032	98.1939682180131	97.7336158293031	96.7843806652872	93.8499774984812
98.8155186413123	98.8035665442891	98.7661751169815	98.6983882609113	98.5899807249193	98.4209700214795	98.1499296911117	97.6782794785505	96.7056170086972	93.6976732660164
98.7873633177987	98.7751264602362	98.7368436404968	98.6674404373635	98.5564471842373	98.3834028457002	98.1058856126904	97.6229343143026	96.6268307119153	93.5452445627342
98.7592050022094	98.7466833538704	98.7075090027266	98.6364892008983	98.5229098467456	98.3458312831246	98.061836017449	97.5675803556767	96.5480216458528	93.3926906533857
98.731043694287	98.7182372256473	98.6781712055726	98.6055345563921	98.4893687232915	98.3082553552746	98.0177809390089	97.512217616491	96.4691896785091	93.2400108175936
98.7028793938059	98.6897880760566	98.6488302509932	98.5745765088226	98.4558238248803	98.270675083728	97.9737204098053	97.4568461056428	96.3903346761584	93.0872043473447
98.674712100573	98.661335905623	98.6194861410045	98.5436150632698	98.4222751626713	98.2330904900812	97.9296544609996	97.4014658274953	96.3114565041918	92.9342705450085
98.6465418144272	98.6328807149067	98.5901388776806	98.5126502249164	98.3887227479717	98.1955015959119	97.8855831224124	97.3460767822571	96.2325550277118	92.7812087217504
98.6183685352399	98.6044225045038	98.560788463155	98.4816819990474	98.3551665922306	98.1579084227418	97.8415064224745	97.2906789663469	96.153630111949	92.6280181962444
98.5901922629148	98.5759612750473	98.5314348996206	98.4507103910509	98.3216067070322	98.1203109919994	97.7974243881934	97.2352723727347	96.0746816225506	92.474698293614
98.5620129973886	98.5474970272074	98.5020781893309	98.4197354064172	98.2880431040874	98.0827093249844	97.753337045134	97.1798569912591	95.9957094257768	92.3212483445499
98.5338307386308	98.519029761692	98.4727183346005	98.3887570507388	98.2544757952264	98.0451034428339	97.7092444174114	97.1244328089197	95.9167133886322	92.1676676845649
98.5056454866439	98.4905594792478	98.4433553378056	98.3577753297099	98.220904792389	98.0074933664895	97.6651465276936	97.0689998101429	95.8376933789487	92.0139556533567
98.4774572414638	98.4620861806604	98.413989201385	98.3267902491255	98.1873301076158	97.9698791166666	97.6210433972131	97.0135579770242	95.758649265436	91.8601115942583
98.44926600316	98.433609866755	98.3846199278401	98.2958018148803	98.1537517530384	97.9322607138264	97.5769350457848	96.958107289548	95.6795809177074	91.7061348537565
98.4210717718358	98.4051305383971	98.3552475197361	98.2648100329678	98.1201697408691	97.8946381781488	97.5328214918301	96.9026477257856	95.600488206288	91.5520247810687
98.3928745476285	98.3766481964928	98.3258719797017	98.2338149094788	98.086584083391	97.8570115295091	97.4887027524055	96.8471792620742	95.5213710026124	91.3977807277662
98.36467433071	98.3481628419898	98.2964933104302	98.2028164505997	98.0529947929473	97.819380787455	97.444578843234	96.7917018731783	95.4422291790124	91.2434020474362
98.3364711212868	98.3196744758776	98.2671115146796	98.171814662611	98.0194018819309	97.7817459711875	97.4004497787405	96.7362155324345	95.3630626087	91.0888880953779
98.3082649196002	98.291183099188	98.2377265952728	98.1408095518849	97.9858053627739	97.7441070995424	97.3563155720878	96.680720211883	95.2838711657466	90.9342382283265
98.2800557259271	98.2626887129959	98.2083385550981	98.1098011248834	97.952205247937	97.7064641909752	97.3121762352144	96.6252158823848	95.2046547250585	90.7794518042007
98.2518435405798	98.2341913184198	98.1789473971092	98.0787893881561	97.9186015498988	97.6688172635467	97.2680317788736	96.5697025137284	95.1254131623525	90.6245281818728
98.2236283639067	98.2056909166219	98.1495531243254	98.0477743483374	97.884994281146	97.631166334911	97.2238822126724	96.5141800747252	95.0461463541295	90.4694667209557
98.1954101962924	98.1771875088091	98.1201557398316	98.0167560121439	97.8513834541625	97.5935114223053	97.1797275451106	96.458648533296	94.9668541776483	90.3142667816068
98.1671890381582	98.1486810962332	98.0907552467786	97.9857343863716	97.8177690814202	97.5558525425413	97.1355677836197	96.4031078565491	94.8875365108992	90.1589277243461
98.1389648899626	98.1201716801915	98.0613516483825	97.9547094778931	97.7841511753688	97.5181897119976	97.0914029346011	96.3475580108506	94.8081932325782	90.003448909887
98.1107377522012	98.0916592620271	98.0319449479251	97.9236812936544	97.7505297484262	97.4805229466146	97.0472330034644	96.2919989618884	94.7288242220609	89.8478296989783
98.0825076254075	98.0631438431294	98.0025351487533	97.8926498406717	97.7169048129699	97.442852261889	97.0030579946637	96.2364306747299	94.6494293593783	89.6920694522563
98.054274510153	98.0346254249344	97.9731222542789	97.8616151260282	97.6832763813273	97.4051776728715	96.958877911734	96.1808531138741	94.5700085251916	89.5361675301062
98.0260384070477	98.0061040089254	97.9437062679786	97.8305771568706	97.649644465768	97.3674991941642	96.914692757326	96.1252662432997	94.4905616007691	89.3801232925316
97.9977993167404	97.977579596633	97.9142871933929	97.799535940406	97.6160090784949	97.3298168399194	96.8705025332403	96.0696700265077	94.4110884679632	89.2239360990315
97.9695572399194	97.9490521896356	97.8848650341263	97.768491483898	97.5823702316366	97.2921306238393	96.8263072404598	96.0140644265609	94.3315890091876	89.0676053084841
97.9413121773121	97.9205217895597	97.8554397938464	97.7374437946634	97.5487279372399	97.2544405591769	96.7821068791821	95.9584494061196	94.2520631073967	88.9111302790365
97.9130641296862	97.8919883980801	97.8260114762832	97.7063928800684	97.5150822072624	97.216746658737	96.7379014488493	95.9028249274746	94.1725106460641	88.7545103680003
97.8848130978495	97.8634520169204	97.7965800852287	97.6753387475252	97.481433053566	97.1790489348786	96.6936909481781	95.8471909525762	94.0929315091629	88.5977449317519
97.8565590826505	97.8349126478528	97.7671456245358	97.6442814044885	97.4477804879098	97.141347399517	96.6494753751878	95.7915474430619	94.013325581146	88.4408333256379
97.8283020849788	97.806370292699	97.7377080981181	97.6132208584512	97.4141245219449	97.1036420641277	96.6052547272273	95.735894360281	93.9336927469281	88.2837749038844
97.8000421057651	97.7778249533296	97.7082675099481	97.5821571169415	97.3804651672078	97.0659329397493	96.5610290010018	95.6802316653174	93.8540328918665	88.1265690195105
97.771779145982	97.7492766316647	97.6788238640572	97.5510901875187	97.3468024351151	97.0282200369884	96.5167981925971	95.6245593190104	93.7743459017449	87.9692150242453
97.7435132066441	97.720725329674	97.6493771645342	97.52002007777	97.3131363369587	96.9905033660233	96.4725622975043	95.5688772819738	93.6946316627556	87.8117122684479
97.7152442888081	97.6921710493768	97.6199274155244	97.4889467953066	97.2794668839008	96.9527829366095	96.4283213106422	95.5131855146134	93.614890061484	87.6540601010307
97.6869723935736	97.6636137928421	97.5904746212285	97.45787034776	97.2457940869696	96.9150587580844	96.3840752263798	95.4574839771428	93.5351209848923	87.4962578693858
97.658697522083	97.6350535621884	97.5610187859017	97.4267907427789	97.2121179570546	96.8773308393726	96.3398240385572	95.4017726295988	93.4553243203047	87.3383049193134
97.630419675522	97.6064903595843	97.5315599138519	97.3957079880254	97.1784385049035	96.8395991889918	96.2955677405054	95.3460514318544	93.3754999553929	87.1802005949531
97.6021388551196	97.5779241872478	97.5020980094394	97.3646220911714	97.1447557411182	96.8018638150582	96.2513063250664	95.2903203436314	93.2956477781615	87.0219442387169
97.5738550621488	97.5493550474465	97.472633077075	97.3335330598955	97.1110696761514	96.7641247252926	96.2070397846109	95.2345793245122	93.2157676769348	86.8635351912247
97.5455682979263	97.5207829424978	97.4431651212188	97.3024409018795	97.0773803203041	96.7263819270262	96.1627681110563	95.1788283339503	93.1358595403433	86.7049727912413
97.5172785638133	97.4922078747683	97.4136941463791	97.2713456248052	97.0436876837221	96.6886354272069	96.1184912958837	95.1230673312797	93.0559232573113	86.5462563756158
97.4889858612153	97.4636298466738	97.3842201571108	97.2402472363508	97.0099917763942	96.6508852324053	96.0742093301538	95.0672962757246	92.9759587170438	86.3873852792216
97.4606901915825	97.4350488606794	97.3547431580144	97.2091457441882	96.9762926081496	96.613131348821	96.0299222045227	95.0115151264072	92.8959658090155	86.2283588348989
97.4323915564098	97.406464919299	97.325263153734	97.1780411559797	96.9425901886557	96.5753737822886	95.9856299092564	94.9557238423555	92.8159444229586	86.0691763733981
97.4040899572372	97.377878025095	97.2957801489566	97.146933479375	96.9088845274167	96.5376125382844	95.9413324342447	94.8999223825106	92.7358944488516	85.9098372233244
97.3757853956497	97.3492881806783	97.2662941484101	97.115822722008	96.8751756337717	96.4998476219322	95.8970297690156	94.8441107057329	92.6558157769088	85.7503407110839
97.3474778732778	97.3206953887077	97.2368051568619	97.0847088914944	96.8414635168932	96.4620790380097	95.8527219027474	94.7882887708087	92.5757082975695	85.5906861608309
97.3191673917971	97.2920996518899	97.2073131791178	97.0535919954285	96.8077481857861	96.4243067909548	95.8084088242815	94.7324565364552	92.495571901488	85.4308728944157
97.2908539529287	97.263500972979	97.17781822002	97.0224720413806	96.7740296492868	96.3865308848717	95.7640905221341	94.6766139613261	92.4154064795234	85.2709002313337
97.2625375584393	97.2348993547759	97.148320284446	96.9913490368943	96.7403079160617	96.348751323537	95.7197669845075	94.6207610040161	92.3352119227304	85.1107674886758
97.2342182101413	97.2062948001282	97.1188193773069	96.9602229894839	96.7065829946072	96.3109681104056	95.6754381993014	94.5648976230657	92.2549881223496	84.9504739810788
97.2058959098924	97.1776873119298	97.0893155035459	96.9290939066322	96.6728548932488	96.2731812486171	95.6311041541228	94.5090237769649	92.1747349697988	84.7900190206772
97.1775706595961	97.1490768931201	97.0598086681369	96.8979617957876	96.6391236201405	96.2353907410013	95.5867648362961	94.4531394241571	92.0944523566642	84.6294019170554
97.1492424612014	97.1204635466838	97.0302988760826	96.8668266643622	96.605389183265	96.1975965900845	95.5424202328728	94.3972445230428	92.0141401746914	84.4686219772007
97.1209113167031	97.0918472756502	97.0007861324133	96.835688519729	96.5716515904331	96.1597987980948	95.4980703306404	94.3413390319826	91.9337983157778	84.3076785054568
97.0925772281412	97.0632280830931	96.9712704421856	96.8045473692205	96.537910849284	96.1219973669684	95.4537151161316	94.2854229093002	91.8534266719641	84.1465708034784
97.0642401976013	97.0346059721295	96.9417518104802	96.7734032201257	96.5041669672849	96.0841922983544	95.409354575632	94.2294961132851	91.7730251354265	83.9852981701849
97.0359002272145	97.0059809459199	96.912230242401	96.7422560796888	96.470419951732	96.0463835936211	95.364988695189	94.1735586021956	91.6925935984694	83.8238599017166
97.0075573191567	96.9773530076669	96.8827057430732	96.7111059551068	96.43666980975	96.0085712538611	95.3206174606188	94.1176103342604	91.6121319535175	83.6622552913895
96.9792114756494	96.9487221606151	96.8531783176419	96.6799528535279	96.4029165482928	95.9707552798967	95.2762408575141	94.0616512676813	91.5316400931088	83.500483629652
96.9508626989586	96.9200884080504	96.8236479712707	96.6487967820494	96.3691601741441	95.932935672285	95.2318588712514	94.0056813606352	91.4511179098879	83.3385442040403
96.9225109913954	96.8914517532992	96.7941147091402	96.6176377477162	96.3354006939176	95.8951124313231	95.1874714869976	93.9497005712754	91.3705652965984	83.1764362991361
96.8941563553152	96.8628121997278	96.7645785364463	96.5864757575191	96.301638114058	95.8572855570535	95.1430786897163	93.8937088577338	91.2899821460769	83.014159196523
96.8657987931179	96.8341697507417	96.735039458399	96.555310818393	96.2678724408416	95.8194550492686	95.0986804641746	93.8377061781224	91.2093683512462	82.8517121747439
96.8374383072475	96.8055244097849	96.7054974802206	96.5241429372156	96.2341036803768	95.7816209075158	95.0542767949489	93.7816924905344	91.1287238051088	82.6890945092587
96.8090749001916	96.7768761803392	96.6759526071448	96.4929721208059	96.2003318386053	95.7437831311022	95.0098676664306	93.7256677530458	91.0480484007412	82.5263054724019
96.7807085744816	96.7482250659237	96.6464048444147	96.4617983759227	96.1665569213026	95.7059417190993	94.9654530628317	93.6696319237164	90.9673420312873	82.3633443333406
96.7523393326921	96.7195710700935	96.6168541972817	96.4306217092635	96.1327789340794	95.6680966703476	94.9210329681904	93.6135849605909	90.8866045899526	82.2002103580327
96.7239671774406	96.6909141964394	96.5873006710041	96.3994421274628	96.0989978823821	95.6302479834611	94.8766073663759	93.5575268217	90.8058359699988	82.0369028091852
96.6955921113871	96.662254448587	96.5577442708456	96.3682596370913	96.0652137714942	95.5923956568315	94.8321762410934	93.501457465061	90.7250360647378	81.8734209462125
96.667214137234	96.633591830196	96.5281850020739	96.3370742446547	96.0314266065372	95.5545396886329	94.7877395758892	93.445376848679	90.6442047675264	81.7097640251952
96.6388332577255	96.6049263449593	96.4986228699597	96.3058859565923	95.9976363924715	95.5166800768255	94.7432973541548	93.3892849305472	90.5633419717605	81.5459312988383
96.6104494756472	96.5762579966021	96.4690578797748	96.2746947792765	95.9638431340981	95.4788168191601	94.6988495591316	93.333181668648	90.4824475708705	81.3819220164304
96.5820627938257	96.5475867888814	96.4394900367913	96.2435007190112	95.9300468360593	95.440949913182	94.654396173915	93.277067020953	90.4015214583156	81.2177354238022
96.5536732151285	96.5189127255849	96.4099193462802	96.2123037820314	95.8962475028398	95.4030793562348	94.6099371814585	93.2209409454241	90.3205635275791	81.0533707632854
96.5252807424629	96.4902358105303	96.3803458135099	96.181103974502	95.8624451387684	95.3652051454647	94.5654725645776	93.1648034000134	90.2395736721631	80.8888272736714
96.4968853787762	96.4615560475646	96.3507694437452	96.1499013025171	95.8286397480189	95.3273272778235	94.5210023059537	93.1086543426642	90.158551785584	80.7241041901703
96.4684871270547	96.4328734405627	96.321190242246	96.1186957720992	95.7948313346114	95.2894457500731	94.4765263881376	93.0524937313107	90.0774977613678	80.5592007443696
96.4400859903237	96.4041879934276	96.2916082142661	96.0874873891988	95.7610199024139	95.2515605587886	94.4320447935529	92.9963215238785	89.9964114930451	80.3941161641931
96.4116819716464	96.3754997100883	96.2620233650519	96.056276159693	95.7272054551428	95.2136717003619	94.3875575044996	92.9401376782853	89.9152928741467	80.2288496738594
96.3832750741239	96.3468085944999	96.2324356998414	96.0250620893854	95.6933879963653	95.1757791710053	94.3430645031574	92.8839421524403	89.8341417981995	80.0634004938412
96.3548653008945	96.3181146506424	96.2028452238632	95.9938451840056	95.6595675294998	95.1378829667548	94.2985657715883	92.827734904245	89.7529581587215	79.8977678408232
96.326452655133	96.2894178825199	96.1732519423348	95.9626254492083	95.6257440578176	95.0999830834732	94.2540612917402	92.7715158915928	89.6717418492182	79.7319509276613
96.2980371400502	96.2607182941594	96.1436558604622	95.9314028905729	95.5919175844444	95.0620795168534	94.2095510454497	92.7152850723696	89.5904927631778	79.5659489633405
96.2696187588924	96.2320158896106	96.1140569834384	95.900177513603	95.5580881123614	95.0241722624219	94.1650350144446	92.6590424044533	89.5092107940674	79.399761152934
96.2411975149408	96.2033106729445	96.0844553164424	95.8689493237264	95.5242556444066	94.9862613155413	94.1205131803468	92.6027878457144	89.4278958353287	79.2333866975606
96.212773411511	96.1746026482525	96.0548508646385	95.8377183262939	95.4904201832764	94.9483466714136	94.075985524675	92.5465213540153	89.3465477803745	79.0668247943436
96.1843464519518	96.1458918196461	96.0252436331746	95.8064845265797	95.4565817315269	94.9104283250832	94.0314520288472	92.4902428872109	89.2651665225842	78.9000746363681
96.1559166396455	96.1171781912555	95.995633627182	95.7752479297805	95.4227402915749	94.8725062714395	93.9869126741828	92.4339524031479	89.1837519553003	78.7331354126396
96.1274839780066	96.0884617672288	95.9660208517739	95.7440085410158	95.3888958656998	94.8345805052201	93.9423674419052	92.3776498596654	89.1023039718245	78.566006308041
96.0990484704813	96.0597425517313	95.9364053120446	95.7127663653269	95.3550484560445	94.7966510210129	93.8978163131444	92.3213352145939	89.0208224654141	78.3986865032906
96.0706101205469	96.0310205489448	95.9067870130687	95.6815214076774	95.3211980646172	94.7587178132596	93.8532592689383	92.2650084257562	88.9393073292783	78.2311751748989
96.0421689317111	96.0022957630661	95.8771659599	95.6502736729525	95.2873446932922	94.7207808762575	93.8086962902357	92.2086694509662	88.8577584565746	78.0634714951263
96.0137249075114	95.9735681983069	95.8475421575707	95.619023165959	95.2534883438117	94.6828402041626	93.7641273578978	92.1523182480294	88.7761757404051	77.89557463194
95.9852780515144	95.9448378588924	95.8179156110907	95.5877698914252	95.2196290177868	94.6448957909919	93.7195524527003	92.0959547747424	88.6945590738132	77.72748374897
95.956828367315	95.9161047490607	95.7882863254465	95.5565138540007	95.1857667166993	94.6069476306257	93.6749715553354	92.039578988893	88.6129083497802	77.5591980054668
95.9283758585357	95.887368873062	95.7586543056005	95.5252550582564	95.1519014419025	94.5689957168103	93.6303846464134	91.9831908482593	88.531223461222	77.3907165562565
95.8999205288262	95.8586302351574	95.7290195564902	95.4939935086842	95.1180331946228	94.5310400431601	93.5857917064648	91.9267903106101	88.4495043009854	77.2220385516977
95.8714623818622	95.8298888396186	95.6993820830274	95.4627292096973	95.084161975961	94.4930806031599	93.5411927159418	91.8703773337043	88.3677507618452	77.0531631376369
95.8430014213453	95.8011446907265	95.6697418900974	95.4314621656297	95.0502877868934	94.455117390167	93.4965876552196	91.8139518752909	88.2859627365007	76.8840894553642
95.8145376510016	95.7723977927709	95.6400989825586	95.4001923807367	95.0164106282735	94.4171503974136	93.4519765045988	91.7575138931083	88.204140117573	76.7148166415684
95.7860710745815	95.7436481500493	95.610453365241	95.3689198591946	94.9825305008329	94.3791796180091	93.4073592443064	91.7010633448842	88.1222827976012	76.5453438282923
95.7576016958587	95.7148957668661	95.5808050429465	95.337644605101	94.9486474051828	94.3412050449414	93.3627358544972	91.6446001883354	88.0403906690396	76.3756701428872
95.7291295186296	95.6861406475319	95.5511540204473	95.3063666224742	94.9147613418152	94.3032266710798	93.3181063152555	91.5881243811675	87.958463624255	76.2057947079673
95.7006545467125	95.6573827963628	95.5215003024858	95.2750859152543	94.8808723111039	94.2652444891764	93.2734706065967	91.5316358810741	87.8765015555231	76.035716641364
95.672176783947	95.6286222176793	95.491843893774	95.2438024873023	94.8469803133063	94.2272584918683	93.2288287084679	91.475134645737	87.7945043550259	75.8654350560799
95.6436962341928	95.5998589158058	95.4621847989923	95.2125163424009	94.8130853485642	94.1892686716795	93.18418060075	91.4186206328255	87.7124719148487	75.6949490602417
95.6152129013297	95.5710928950696	95.4325230227896	95.181227484254	94.7791874169051	94.1512750210225	93.1395262632585	91.3620937999965	87.630404126977	75.5242577570543
95.5867267892562	95.5423241598001	95.4028585697819	95.1499359164876	94.7452865182436	94.1132775322006	93.094865675745	91.3055541048934	87.548300883294	75.3533602447527
95.558237901889	95.5135527143283	95.3731914445527	95.1186416426493	94.7113826523822	94.0752761974089	93.0501988178979	91.2490015051464	87.4661620755775	75.1822556165553
95.5297462431625	95.4847785629856	95.3435216516516	95.0873446662084	94.677475819013	94.0372710087368	93.0055256693442	91.1924359583717	87.3839875954971	75.0109429606158
95.5012518170275	95.4560017101035	95.3138491955943	95.0560449905569	94.6435660177185	93.9992619581693	92.96084620965	91.1358574221714	87.3017773346118	74.8394213599747
95.4727546274509	95.4272221600124	95.2841740808615	95.0247426190088	94.6096532479729	93.9612490375887	92.9161604183219	91.079265854133	87.2195311843668	74.6676898925116
95.4442546784149	95.3984399170413	95.254496311899	94.9934375548006	94.5757375091434	93.9232322387761	92.8714682748081	91.0226612118288	87.1372490360909	74.4957476308955
95.4157519739159	95.3696549855166	95.2248158931171	94.9621298010917	94.5418188004907	93.8852115534132	92.826769758499	90.9660434528159	87.0549307809942	74.3235936425356
95.3872465179642	95.3408673697617	95.1951328288895	94.9308193609644	94.5078971211712	93.8471869730838	92.7820648487286	90.9094125346354	86.9725763101651	74.1512269895323
95.3587383145831	95.3120770740962	95.1654471235538	94.8995062374239	94.4739724702372	93.8091584892752	92.7373535247752	90.8527684148123	86.8901855145676	73.9786467286265
95.3302273678081	95.2832841028349	95.1357587814101	94.8681904333993	94.4400448466383	93.7711260933798	92.6926357658623	90.796111050855	86.8077582850393	73.8058519111491
95.3017136816859	95.2544884602877	95.1060678067212	94.8368719517431	94.4061142492226	93.7330897766962	92.6479115511595	90.7394404002548	86.7252945122881	73.6328415829707
95.2731972602744	95.2256901507584	95.0763742037121	94.8055507952315	94.3721806767377	93.6950495304312	92.6031808597834	90.6827564204854	86.6427940868903	73.4596147844498
95.244678107641	95.1968891785439	95.0466779765693	94.7742269665653	94.3382441278317	93.6570053457007	92.5584436707985	90.6260590690028	86.5602568992875	73.2861705503812
95.2161562278628	95.1680855479341	95.0169791294407	94.7429004683694	94.3043046010544	93.6189572135312	92.5136999632176	90.5693483032446	86.4776828397848	73.1125079099441
95.187631625025	95.1392792632106	94.9872776664348	94.7115713031937	94.270362094858	93.5809051248612	92.4689497160032	90.5126240806297	86.3950717985476	72.9386258866492
95.1591043032209	95.1104703286465	94.9575735916211	94.6802394735127	94.2364166075987	93.5428490705424	92.4241929080676	90.4558863585579	86.3124236655999	72.7645234982859
95.1305742665507	95.0816587485055	94.9278669090289	94.6489049817266	94.2024681375372	93.5047890413408	92.379429518274	90.3991350944092	86.2297383308213	72.5901997568684
95.1020415191209	95.0528445270412	94.8981576226475	94.6175678301609	94.1685166828399	93.4667250279384	92.3346595254371	90.3423702455437	86.1470156839449	72.4156536685825
95.0735060650438	95.0240276684967	94.8684457364256	94.586228021067	94.1345622415798	93.4286570209339	92.2898829083236	90.2855917693012	86.0642556145549	72.2408842337304
95.0449679084363	94.9952081771037	94.838731254271	94.5548855566228	94.1006048117377	93.3905850108442	92.2450996456534	90.2287996230003	85.9814580120841	72.0658904466763
95.0164270534197	94.9663860570819	94.8090141800506	94.5235404389321	94.066644391203	93.3525089881055	92.2003097160994	90.1719937639386	85.8986227658119	71.8906712957907
94.9878835041186	94.9375613126388	94.7792945175897	94.4921926700261	94.0326809777746	93.3144289430743	92.1555130982888	90.1151741493917	85.8157497648616	71.7152257633947
94.9593372646604	94.9087339479684	94.7495722706718	94.4608422518627	93.9987145691618	93.2763448660286	92.1107097708033	90.0583407366131	85.7328388981983	71.5395528257035
94.9307883391746	94.8799039672513	94.7198474430386	94.4294891863274	93.9647451629857	93.238256747169	92.0658997121801	90.0014934828337	85.6498900546267	71.3636514527696
94.902236731792	94.8510713746534	94.6901200383895	94.3981334752336	93.9307727567794	93.2001645766198	92.0210829009117	89.9446323452612	85.5669031227885	71.1875206084253
94.873682446644	94.8222361743259	94.6603900603812	94.3667751203225	93.8967973479893	93.1620683444299	91.9762593154474	89.8877572810799	85.4838779911608	71.0111592502247
94.8451254878621	94.7933983704045	94.6306575126277	94.3354141232639	93.8628189339762	93.1239680405739	91.9314289341928	89.8308682474503	85.400814548053	70.8345663293853
94.816565859577	94.764557967009	94.6009223987002	94.3040504856563	93.8288375120155	93.0858636549531	91.8865917355113	89.7739652015081	85.3177126816056	70.6577407907288
94.7880035659179	94.7357149682422	94.5711847221266	94.2726842090273	93.794853079299	93.0477551773964	91.8417476977236	89.7170481003646	85.234572279787	70.4806815726217
94.7594386110123	94.70686937819	94.5414444863911	94.2413152948341	93.7608656329348	93.0096425976615	91.7968967991091	89.6601169011056	85.1513932303921	70.3033876069153
94.7308709989845	94.6780212009207	94.5117016949345	94.2099437444633	93.7268751699489	92.9715259054354	91.7520390179056	89.6031715607913	85.0681754210396	70.1258578188843
94.7023007339558	94.649170440484	94.4819563511538	94.178569559232	93.6928816872855	92.9334050903357	91.7071743323102	89.5462120364556	84.9849187391703	69.9480911271664
94.6737278200433	94.6203171009113	94.4522084584018	94.1471927403875	93.6588851818083	92.8952801419112	91.6623027204795	89.4892382851061	84.9016230720445	69.7700864436995
94.6451522613593	94.5914611862142	94.4224580199872	94.1158132891079	93.6248856503009	92.8571510496431	91.6174241605301	89.4322502637232	84.8182883067404	69.59184267366
94.6165740620109	94.562602700385	94.3927050391744	94.0844312065026	93.5908830894677	92.8190178029456	91.5725386305391	89.3752479292597	84.7349143301515	69.4133587153993
94.5879932260994	94.5337416473955	94.3629495191829	94.0530464936123	93.556877495935	92.7808803911666	91.5276461085441	89.3182312386407	84.6515010289848	69.2346334603801
94.5594097577191	94.5048780311967	94.3331914631879	94.0216591514098	93.5228688662512	92.7427388035891	91.4827465725439	89.2612001487631	84.5680482897585	69.055665793112
94.5308236609573	94.4760118557183	94.3034308743195	93.9902691807999	93.4888571968882	92.7045930294314	91.437840000499	89.2041546164947	84.4845559988001	68.876454591087
94.5022349398936	94.4471431248686	94.2736677556629	93.9588765826198	93.4548424842417	92.666443057848	91.3929263703313	89.1470945986743	84.4010240422445	68.6969987247133
94.4736435985989	94.4182718425333	94.2439021102583	93.9274813576398	93.420824724632	92.6282888779308	91.3480056599254	89.0900200521111	84.3174523060313	68.5172970572493
94.4450496411352	94.3893980125756	94.2141339411004	93.8960835065635	93.3868039143051	92.5901304787093	91.3030778471278	89.0329309335839	84.2338406759035	68.3373484447368
94.4164530715548	94.3605216388357	94.1843632511386	93.8646830300277	93.3527800494331	92.5519678491517	91.2581429097483	88.9758271998415	84.150189037405	68.1571517359334
94.3878538938998	94.3316427251302	94.1545900432769	93.8332799286036	93.3187531261147	92.5138009781652	91.2132008255594	88.9187088076012	84.0664972758789	67.9767057722438
94.3592521122013	94.3027612752516	94.1248143203737	93.8018742027964	93.2847231403765	92.4756298545975	91.1682515722972	88.8615757135495	83.9827652764652	67.7960093876516
94.3306477304793	94.2738772929681	94.0950360852418	93.7704658530458	93.2506900881732	92.4374544672365	91.1232951276614	88.8044278743405	83.8989929240988	67.615061408649
94.3020407527416	94.2449907820231	94.0652553406478	93.7390548797269	93.2166539653885	92.3992748048119	91.0783314693155	88.7472652465966	83.8151801035077	67.4338606541668
94.2734311829835	94.2161017461347	94.035472089313	93.7076412831496	93.1826147678359	92.361090855995	91.0333605748875	88.6900877869071	83.7313266992111	67.2524059355031
94.2448190251874	94.1872101889954	94.0056863339125	93.6762250635599	93.1485724912589	92.3229026094001	90.9883824219695	88.6328954518284	83.647432595517	67.0706960562518
94.2162042833217	94.1583161142717	93.9758980770751	93.6448062211395	93.1145271313322	92.2847100535848	90.9433969881185	88.5756881978834	83.5634976765206	66.8887298122298
94.187586961341	94.1294195256036	93.946107321384	93.6133847560068	93.0804786836621	92.2465131770504	90.8984042508562	88.518465981561	83.4795218261023	66.7065059914038
94.1589670631849	94.1005204266044	93.916314069376	93.5819606682164	93.0464271437869	92.2083119682431	90.8534041876697	88.4612287593156	83.3955049279254	66.5240233738163
94.130344592778	94.0716188208601	93.8865183235416	93.5505339577604	93.0123725071781	92.1701064155539	90.8083967760112	88.4039764875671	83.3114468654347	66.3412807315107
94.1017195540289	94.0427147119292	93.8567200863251	93.519104624568	92.9783147692406	92.1318965073197	90.7633819932988	88.3467091226998	83.2273475218541	66.158276828456
94.07309195083	94.0138081033424	93.8269193601246	93.4876726685063	92.9442539253132	92.0936822318239	90.7183598169159	88.2894266210626	83.1432067801849	65.9750104204698
94.044461787057	93.9848989986021	93.7971161472918	93.4562380893803	92.9101899706697	92.0554635772964	90.6733302242122	88.2321289389682	83.0590245232039	65.791480255142
94.0158290665683	93.955987401182	93.7673104501318	93.4248008869335	92.8761229005191	92.0172405319148	90.6282931925035	88.1748160326928	82.9748006334612	65.607685071756
93.9871937932044	93.927073314527	93.7375022709034	93.3933610608482	92.8420527100061	91.9790130838046	90.5832486990718	88.1174878584758	82.8905349932788	65.4236236012103
93.9585559707876	93.8981567420526	93.7076916118191	93.3619186107455	92.8079793942123	91.9407812210397	90.5381967211657	88.0601443725191	82.8062274847479	65.239294565939
93.9299156031215	93.869237687145	93.6778784750446	93.3304735361862	92.7739029481558	91.902544931643	90.4931372360004	88.0027855309871	82.7218779897279	65.0546966798309
93.9012726939905	93.8403161531601	93.6480628626992	93.2990258366707	92.7398233667926	91.8643042035872	90.4480702207579	87.9454112900057	82.637486389844	64.8698286481486
93.8726272471592	93.8113921434238	93.6182447768559	93.2675755116393	92.705740645017	91.8260590247946	90.4029956525872	87.8880216056624	82.5530525664851	64.6846891674458
93.8439792663721	93.7824656612316	93.5884242195409	93.236122560473	92.6716547776617	91.7878093831383	90.3579135086044	87.8306164340057	82.4685764008025	64.4992769254849
93.8153287553532	93.753536709848	93.5586011927339	93.2046669824934	92.6375657594987	91.7495552664423	90.312823765893	87.7731957310447	82.3840577737076	64.3135906011522
93.7866757178054	93.7246052925064	93.528775698368	93.173208776963	92.6034735852398	91.7112966624819	90.2677264015036	87.7157594527486	82.2994965658701	64.1276288643739
93.7580201574101	93.6956714124089	93.4989477383299	93.1417479430857	92.5693782495372	91.6730335589845	90.2226213924546	87.6583075550464	82.2148926577162	63.9413903760296
93.7293620778268	93.6667350727259	93.4691173144597	93.1102844800073	92.5352797469835	91.6347659436297	90.1775087157318	87.6008399938265	82.1302459294268	63.754873787866
93.7007014826929	93.6377962765958	93.4392844285507	93.0788183868154	92.5011780721131	91.5964938040499	90.1323883482889	87.5433567249362	82.0455562609352	63.5680777424092
93.6720383756227	93.608855027125	93.4094490823501	93.0473496625398	92.4670732194019	91.558217127831	90.0872602670474	87.4858577041814	81.960823531926	63.381000872876
93.6433727602076	93.5799113273872	93.3796112775583	93.0158783061532	92.4329651832681	91.519935902512	90.0421244488969	87.4283428873261	81.8760476218325	63.1936418030841
93.6147046400153	93.5509651804235	93.3497710158292	92.9844043165712	92.3988539580727	91.4816501155864	89.9969808706949	87.3708122300919	81.7912284098353	63.0059991473625
93.5860340185897	93.522016589242	93.3199282987702	92.9529276926524	92.36473953812	91.443359754502	89.9518295092673	87.3132656881581	81.7063657748601	62.8180715104587
93.5573608994503	93.4930655568176	93.2900831279423	92.9214484331993	92.330621917658	91.4050648066615	89.9066703414079	87.2557032171605	81.6214595955764	62.6298574874472
93.5286852860918	93.4641120860918	93.2602355048601	92.889966536958	92.2965010908789	91.3667652594227	89.8615033438792	87.1981247726916	81.536509750395	62.4413556636354
93.5000071819839	93.4351561799725	93.2303854309917	92.8584820026189	92.2623770519195	91.3284611000991	89.816328493412	87.1405303103003	81.4515161174667	62.2525646144694
93.4713265905709	93.4061978413336	93.2005329077588	92.8269948288169	92.2282497948616	91.2901523159604	89.7711457667057	87.0829197854908	81.3664785746801	62.063482905438
93.442643515271	93.3772370730147	93.1706779365367	92.7955050141316	92.1941193137328	91.2518388942323	89.7259551404281	87.0252931537229	81.2813969996599	61.8741090919765
93.4139579594765	93.3482738778215	93.1408205186546	92.7640125570877	92.1599856025064	91.2135208220974	89.6807565912158	86.9676503704113	81.1962712697652	61.6844417193685
93.3852699265531	93.3193082585249	93.1109606553951	92.7325174561553	92.1258486551023	91.1751980866954	89.6355500956742	86.9099913909252	81.1111012620873	61.4944793226476
93.3565794198395	93.2903402178611	93.081098347995	92.7010197097501	92.0917084653871	91.1368706751234	89.5903356303774	86.852316170588	81.0258868534485	61.3042204264969
93.3278864426474	93.2613697585314	93.0512335976444	92.6695193162337	92.0575650271746	91.0985385744361	89.5451131718682	86.7946246646768	80.9406279203994	61.1136635451487
93.2991909982606	93.232396883202	93.0213664054876	92.6380162739142	92.0234183342264	91.0602017716466	89.4998826966586	86.7369168284223	80.855324339218	60.9228071822816
93.2704930899355	93.2034215945036	92.9914967726226	92.606510581046	91.9892683802522	91.021860253726	89.4546441812293	86.6791926170079	80.7699759859071	60.731649830918
93.2417927209	93.1744438950317	92.9616247001016	92.5750022358303	91.95511515891	90.9835140076044	89.4093976020303	86.6214519855697	80.684582736193	60.5401899733189
93.2130898943534	93.145463787346	92.9317501889305	92.5434912364155	91.9209586638067	90.9451630201708	89.3641429354802	86.5636948891962	80.5991444655236	60.348426080879
93.1843846134666	93.1164812739702	92.9018732400694	92.5119775808974	91.8867988884986	90.9068072782737	89.3188801579672	86.5059212829276	80.5136610490662	60.1563566140194
93.1556768813811	93.0874963573923	92.8719938544326	92.4804612673193	91.8526358264913	90.868446768721	89.2736092458483	86.4481311217554	80.4281323617062	59.9639800220798
93.1269667012089	93.0585090400639	92.8421120328883	92.4489422936726	91.8184694712408	90.8300814782807	89.2283301754497	86.3903243606225	80.342558278045	59.7712947432094
93.0982540760326	93.0295193244004	92.8122277762592	92.4174206578969	91.7842998161532	90.7917113936808	89.1830429230669	86.3325009544221	80.2569386723981	59.5782992042564
93.0695390089047	93.0005272127806	92.7823410853221	92.38589635788	91.7501268545855	90.7533365016102	89.1377474649646	86.2746608579982	80.1712734187938	59.3849918206563
93.0408215028474	92.9715327075468	92.7524519608083	92.3543693914589	91.7159505798457	90.7149567887181	89.0924437773767	86.2168040261443	80.0855623909706	59.191370996319
93.0121015608525	92.9425358110044	92.7225604034034	92.3228397564192	91.6817709851933	90.676572241615	89.0471318365065	86.1589304136037	79.999805462376	58.9974351235144
92.9833791858809	92.913536525422	92.6926664137475	92.291307450496	91.6475880638397	90.6381828468727	89.0018116185263	86.1010399750688	79.9140025061645	58.8031825827574
92.9546543808625	92.8845348530311	92.6627699924352	92.2597724713739	91.6134018089483	90.5997885910243	88.9564830995781	86.0431326651809	79.828153395196	58.6086117426903
92.9259271486958	92.855530796026	92.6328711400159	92.2282348166873	91.5792122136352	90.5613894605652	88.911146255773	85.9852084385297	79.7422580020333	58.4137209599655
92.8971974922481	92.8265243565637	92.6029698569935	92.1966944840207	91.5450192709691	90.5229854419523	88.8658010631915	85.9272672496529	79.6563161989413	58.2185085791255
92.8684654143545	92.7975155367639	92.5730661438268	92.1651514709087	91.5108229739721	90.4845765216053	88.8204474978834	85.8693090530362	79.5703278578843	58.0229729324818
92.8397309178184	92.7685043387085	92.5431600009293	92.1336057748367	91.4766233156196	90.446162685906	88.7750855358681	85.8113338031122	79.4842928505249	57.8271123399935
92.8109940054106	92.739490764442	92.5132514286694	92.1020573932408	91.4424202888409	90.4077439211993	88.729715153134	85.7533414542608	79.3982110482216	57.630925109143
92.7822546798698	92.710474815971	92.4833404273707	92.0705063235084	91.4082138865195	90.369320213793	88.6843363256392	85.6953319608085	79.3120823220274	57.4344095348109
92.7535129439017	92.6814564952642	92.4534269973116	92.0389525629778	91.3740041014933	90.3308915499582	88.638949029311	85.637305277028	79.2259065426878	57.2375638991502
92.7247688001791	92.6524358042524	92.4235111387258	92.0073961089393	91.3397909265548	90.2924579159291	88.5935532400462	85.5792613571378	79.1396835806391	57.0403864714575
92.696022251342	92.6234127448282	92.3935928518021	91.9758369586347	91.3055743544517	90.2540192979042	88.5481489337108	85.5212001553021	79.0534133060066	56.8428755080444
92.6672732999966	92.5943873188463	92.3636721366848	91.9442751092579	91.2713543778871	90.2155756820452	88.5027360861403	85.4631216256301	78.9670955886028	56.6450292521059
92.6385219487159	92.5653595281228	92.3337489934734	91.9127105579553	91.2371309895196	90.1771270544783	88.4573146731397	85.4050257221761	78.8807302979252	56.4468459335887
92.609768200039	92.5363293744355	92.303823422223	91.8811433018254	91.2029041819639	90.1386734012939	88.4118846704831	85.3469123989386	78.7943173031554	56.2483237690566
92.581012056471	92.5072968595241	92.273895422944	91.8495733379199	91.1686739477908	90.1002147085468	88.366446053914	85.2887816098604	78.7078564731562	56.0494609615557
92.5522535204831	92.4782619850893	92.2439649956027	91.8180006632433	91.1344402795275	90.0617509622566	88.3209987991455	85.2306333088279	78.6213476764708	55.8502557004768
92.5234925945122	92.4492247527936	92.214032140121	91.7864252747532	91.1002031696584	90.0232821484078	88.2755428818596	85.172467449671	78.5347907813203	55.6507061614172
92.4947292809604	92.4201851642605	92.1840968563767	91.7548471693608	91.0659626106244	89.9848082529496	88.2300782777081	85.1142839861629	78.4481856556021	55.4508105060403
92.4659635821955	92.3911432210751	92.1541591442033	91.723266343931	91.0317185948241	89.946329261797	88.1846049623116	85.056082872019	78.3615321668883	55.2505668819337
92.4371955005504	92.3620989247834	92.1242190033905	91.6916827952824	90.9974711146136	89.9078451608299	88.1391229112605	84.9978640608977	78.2748301824237	55.0499734224659
92.4084250383228	92.3330522768927	92.0942764336838	91.660096520188	90.9632201623068	89.8693559358941	88.093632100114	84.939627506399	78.1880795691238	54.8490282466412
92.3796521977757	92.3040032788712	92.0643314347852	91.6285075153749	90.9289657301758	89.8308615728011	88.0481325044008	84.8813731620647	78.1012801935736	54.6477294589526
92.3508769811363	92.2749519321484	92.0343840063527	91.5969157775249	90.894707810451	89.7923620573283	88.0026240996187	84.8231009813781	78.0144319220251	54.4460751492334
92.3220993905968	92.2458982381144	92.0044341480008	91.5653213032744	90.8604463953214	89.7538573752193	87.9571068612349	84.7648109177634	77.927534620396	54.2440633925071
92.2933194283135	92.2168421981204	91.9744818593001	91.533724089215	90.826181476935	89.7153475121837	87.9115807646857	84.7065029245856	77.8405881542676	54.0416922488352
92.2645370964071	92.1877838134784	91.9445271397781	91.5021241318935	90.7919130473986	89.6768324538979	87.8660457853763	84.6481769551499	77.7535923888832	53.8389597631635
92.2357523969625	92.1587230854612	91.9145699889189	91.4705214278118	90.7576410987787	89.6383121860046	87.8205018986814	84.5898329627016	77.6665471891463	53.6358639651666
92.2069653320284	92.1296600153025	91.8846104061629	91.4389159734278	90.7233656231012	89.5997866941133	87.7749490799445	84.5314709004259	77.5794524196184	53.4324028690903
92.1781759036176	92.1005946041964	91.8546483909079	91.407307765155	90.6890866123519	89.5612559638006	87.7293873044785	84.473090721447	77.4923079445178	53.2285744735926
92.1493841137064	92.071526853298	91.824683942508	91.3756967993629	90.6548040584764	89.5227199806097	87.683816547565	84.4146923788283	77.4051136277174	53.0243767615827
92.120589964235	92.0424567637228	91.7947170602748	91.3440830723775	90.620517953381	89.4841787300512	87.6382367844549	84.3562758255722	77.3178693327427	52.8198077000578
92.0917934571067	92.0133843365471	91.7647477434766	91.312466580481	90.5862282889321	89.4456321976032	87.5926479903679	84.2978410146191	77.2305749227708	52.6148652399383
92.0629945941887	91.9843095728078	91.734775991339	91.2808473199122	90.551935056957	89.407080368711	87.5470501404927	84.2393878988477	77.1432302606276	52.4095473159014
92.034193377311	91.9552324735021	91.7048018030451	91.2492252868669	90.5176382492441	89.3685232287875	87.501443209987	84.1809164310743	77.0558352087868	52.2038518462117
92.0053898082671	91.9261530395879	91.6748251777351	91.2176004774978	90.4833378575425	89.3299607632135	87.4558271739774	84.1224265640529	76.9683896293676	51.9977767325512
91.9765838888133	91.8970712719836	91.6448461145067	91.1859728879149	90.449033873563	89.2913929573375	87.4102020075592	84.0639182504745	76.880893384133	51.791319859846
91.9477756206692	91.8679871715682	91.6148646124152	91.1543425141855	90.414726288978	89.2528197964759	87.3645676857968	84.005391442967	76.7933463344882	51.5844790960922
91.9189650055169	91.8389007391809	91.5848806704738	91.1227093523346	90.3804150954215	89.2142412659134	87.318924183723	83.9468460940945	76.7057483414785	51.3772522921785
91.8901520450016	91.8098119756215	91.554894287653	91.0910733983449	90.3461002844895	89.1756573509029	87.2732714763397	83.8882821563578	76.6180992657877	51.1696372817078
91.861336740731	91.7807208816504	91.5249054628816	91.0594346481573	90.3117818477402	89.1370680366655	87.2276095386175	83.8296995821934	76.5303989677362	50.9616318808163
91.8325190942754	91.751627457988	91.494914195046	91.0277930976704	90.2774597766943	89.0984733083909	87.1819383454956	83.7710983239732	76.4426473072793	50.7532338879902
91.8036991071677	91.7225317053155	91.464920482991	90.9961487427417	90.2431340628349	89.0598731512374	87.1362578718817	83.7124783340047	76.3548441440051	50.5444410838806
91.7748767809033	91.6934336242743	91.4349243255192	90.9645015791868	90.2088046976078	89.0212675503318	87.0905680926525	83.6538395645303	76.2669893371332	50.3352512311163
91.7460521169398	91.6643332154665	91.4049257213919	90.9328516027801	90.174471672422	88.98265649077	87.0448689826529	83.5951819677271	76.1790827455124	50.1256620741143
91.7172251166971	91.6352304794541	91.3749246693282	90.9011988092551	90.1401349786495	88.9440399576166	86.9991605166965	83.5365054957067	76.091124227619	49.9156713388875
91.6883957815575	91.6061254167599	91.3449211680061	90.869543194304	90.1057946076255	88.9054179359052	86.9534426695655	83.4778101005148	76.0031136415553	49.7052767328516
91.6595641128653	91.577018027867	91.314915216062	90.8378847535785	90.0714505506488	88.8667904106388	86.9077154160105	83.4190957341309	75.9150508450475	49.4944759446279
91.630730111927	91.5479083132189	91.284906812091	90.8062234826897	90.0371027989819	88.8281573667892	86.8619787307505	83.3603623484681	75.8269356954439	49.2832666438453
91.601893780011	91.5187962732194	91.2548959546468	90.7745593772081	90.0027513438512	88.7895187892981	86.8162325884728	83.3016098953729	75.7387680497132	49.0716464809393
91.5730551183479	91.4896819082329	91.224882642242	90.742892432664	89.9683961764469	88.7508746630761	86.7704769638334	83.2428383266245	75.6505477644427	48.8596130869487
91.5442141281299	91.4605652185842	91.1948668733484	90.7112226445477	89.9340372879237	88.7122249730036	86.7247118314563	83.1840475939352	75.5622746958364	48.6471640733097
91.5153708105113	91.4314462045582	91.1648486463965	90.6795500083096	89.8996746694003	88.6735697039306	86.678937165934	83.1252376489496	75.4739486997133	48.4342970316484
91.4865251666082	91.4023248664008	91.1348279597762	90.6478745193602	89.8653083119603	88.6349088406768	86.633152941827	83.0664084432443	75.3855696315055	48.2210095335699
91.4576771974983	91.3732012043178	91.1048048118365	90.6161961730705	89.8309382066519	88.5962423680318	86.5873591336643	83.0075599283282	75.2971373462566	48.0072991304455
91.4288269042213	91.344075218476	91.0747792008859	90.5845149647721	89.7965643444879	88.5575702707549	86.5415557159429	82.9486920556416	75.2086516986194	47.7931633531974
91.3999742877784	91.3149469090023	91.0447511251921	90.5528308897572	89.7621867164464	88.5188925335756	86.495742663128	82.8898047765562	75.1201125428548	47.5785997120804
91.3711193491325	91.2858162759843	91.0147205829828	90.521143943279	89.7278053134706	88.4802091411934	86.449919949653	82.830898042375	75.0315197328295	47.3636056964619
91.342262089208	91.25668331947	90.9846875724448	90.4894541205519	89.6934201264689	88.441520078278	86.4040875499192	82.7719718043316	74.9428731220144	47.1481787745984
91.3134025088912	91.2275480394681	90.9546520917251	90.4577614167511	89.6590311463155	88.4028253294694	86.358245438296	82.7130260135907	74.8541725634826	46.9323163934101
91.2845406090295	91.1984104359478	90.9246141389303	90.4260658270136	89.6246383638498	88.3641248793779	86.312393589121	82.6540606212469	74.765417909908	46.7160159782525
91.2556763904321	91.1692705088389	90.894573712127	90.3943673464375	89.5902417698775	88.3254187125841	86.2665319766995	82.5950755783253	74.6766090135631	46.4992749326854
91.2268098538697	91.1401282580318	90.8645308093421	90.362665970083	89.5558413551697	88.2867068136393	86.2206605753048	82.5360708357806	74.5877457263175	46.2820906382392
91.1979410000744	91.1109836833776	90.8344854285622	90.3309616929717	89.521437110464	88.2479891670654	86.1747793591783	82.4770463444974	74.4988278996358	46.0644604541785
91.1690698297396	91.081836784688	90.8044375677346	90.2992545100875	89.487029026464	88.2092657573547	86.1288883025291	82.4180020552898	74.4098553845762	45.8463817172634
91.1401963435205	91.0526875617357	90.7743872247666	90.2675444163762	89.4526170938397	88.1705365689705	86.0829873795341	82.3589379189007	74.3208280317885	45.6278517415067
91.1113205420334	91.0235360142537	90.7443343975263	90.235831406746	89.4182013032277	88.1318015863469	86.0370765643383	82.2998538860024	74.2317456915122	45.4088678179299
91.082442425856	90.9943821419361	90.714279083842	90.2041154760674	89.3837816452312	88.0930607938888	85.9911558310541	82.2407499071959	74.1426082135751	45.1894272143152
91.0535619955276	90.9652259444378	90.6842212815029	90.1723966191735	89.3493581104202	88.054314175972	85.945225153762	82.1816259330104	74.053415447391	44.9695271749553
91.0246792515486	90.9360674213743	90.6541609882589	90.1406748308601	89.3149306893315	88.0155617169437	85.89928450651	82.1224819139039	73.9641672419584	44.7491649203997
90.9957941943809	90.9069065723223	90.6240982018206	90.1089501058858	89.2804993724691	87.9768034011218	85.8533338633139	82.0633178002621	73.8748634458586	44.5283376471985
90.9669068244479	90.8777433968192	90.59403291986	90.0772224389723	89.246064150304	87.9380392127955	85.8073731981573	82.0041335423989	73.7855039072536	44.307042527643
90.9380171421341	90.8485778943634	90.5639651400096	90.0454918248041	89.2116250132749	87.8992691362255	85.7614024849913	81.9449290905558	73.6960884738851	44.0852767095035
90.9091251477853	90.8194100644145	90.5338948598633	90.0137582580294	89.1771819517875	87.8604931556436	85.7154216977346	81.8857043949019	73.6066169930717	43.8630373157636
90.8802308417091	90.7902399063927	90.5038220769764	89.9820217332595	89.1427349562153	87.821711255253	85.6694308102737	81.8264594055334	73.5170893117081	43.6403214443522
90.8513342241738	90.7610674196798	90.4737467888654	89.9502822450693	89.1082840168994	87.7829234192285	85.6234297964625	81.767194072474	73.4275052762628	43.4171261678713
90.8224352954097	90.7318926036185	90.4436689930081	89.9185397879972	89.073829124149	87.7441296317164	85.5774186301226	81.707908345674	73.3378647327767	43.1934485333218
90.7935340556079	90.7027154575125	90.4135886868442	89.8867943565458	89.0393702682408	87.7053298768344	85.5313972850432	81.6486021750106	73.2481675268608	42.969285561825
90.7646305049212	90.673535980627	90.3835058677747	89.8550459451811	89.0049074394199	87.6665241386722	85.4853657349809	81.5892755102879	73.1584135036953	42.7446342483418
90.7357246434636	90.6443541721883	90.3534205331627	89.8232945483336	88.9704406278994	87.627712401291	85.4393239536599	81.5299283012359	73.068602508027	42.5194915613881
90.7068164713107	90.6151700313842	90.3233326803329	89.7915401603979	88.935969823861	87.588894648724	85.393271914772	81.4705604975114	72.9787343841683	42.2938544427469
90.6779059884992	90.5859835573635	90.2932423065719	89.7597827757326	88.9014950174544	87.5500708649761	85.3472095919763	81.411172048697	72.888808975995	42.0677198071775
90.6489931950274	90.5567947492368	90.2631494091285	89.7280223886611	88.8670161987982	87.5112410340242	85.3011369588996	81.3517629043014	72.7988261269449	41.8410845421205
90.6200780908549	90.527603606076	90.2330539852137	89.6962589934712	88.8325333579794	87.4724051398172	85.2550539891362	81.2923330137592	72.7087856800157	41.6139455074002
90.5911606759028	90.4984101269144	90.2029560320005	89.6644925844155	88.798046485054	87.433563166276	85.2089606562476	81.2328823264305	72.6186874777639	41.3862995349231
90.5622409500537	90.469214310747	90.1728555466244	89.6327231557114	88.7635555700467	87.3947150972939	85.162856933763	81.1734107916011	72.5285313623025	41.1581434283727
90.5333189131516	90.4400161565304	90.1427525261834	89.6009507015412	88.7290606029513	87.355860916736	85.1167427951792	81.1139183584823	72.4383171752997	40.9294739629011
90.5043945650019	90.4108156631829	90.1126469677378	89.5691752160522	88.6945615737307	87.3170006084399	85.0706182139603	81.0544049762106	72.3480447579771	40.7002878848171
90.4754679053717	90.3816128295844	90.0825388683108	89.5373966933571	88.660058472317	87.2781341562155	85.0244831635378	80.9948705938477	72.2577139511081	40.4705819112696
90.4465389339896	90.3524076545768	90.0524282248881	89.5056151275336	88.6255512886116	87.2392615438451	84.9783376173108	80.9353151603806	72.1673245950162	40.2403527299289
90.4176076505456	90.3232001369635	90.0223150344184	89.4738305126252	88.5910400124854	87.2003827550834	84.9321815486461	80.875738624721	72.0768765295731	40.0095969986627
90.3886740546914	90.2939902755101	89.9921992938131	89.4420428426407	88.5565246337787	87.1614977736576	84.8860149308776	80.8161409357057	71.9863695941976	39.7783113452095
90.3597381460404	90.264778068944	89.962080999947	89.4102521115547	88.5220051423016	87.1226065832675	84.8398377373071	80.7565220420963	71.8958036278536	39.5464923668467
90.3307999241675	90.2355635159546	89.9319601496575	89.3784583133074	88.4874815278339	87.0837091675857	84.7936499412035	80.6968818925791	71.8051784690485	39.3141366300564
90.3018593886093	90.2063466151935	89.9018367397456	89.3466614418051	88.4529537801252	87.0448055102571	84.7474515158037	80.6372204357652	71.7144939558316	39.0812406701858
90.2729165388642	90.1771273652743	89.8717107669755	89.3148614909201	88.4184218888952	87.0058955948998	84.701242434312	80.57753762019	71.6237499257927	38.8478009911041
90.2439713743923	90.1479057647728	89.8415822280748	89.2830584544907	88.3838858438335	86.9669794051046	84.6550226699001	80.5178333943138	71.5329462160604	38.6138140648554
90.2150238946153	90.118681812227	89.8114511197346	89.2512523263215	88.3493456346	86.9280569244351	84.6087921957075	80.4581077065213	71.4420826633002	38.3792763313069
90.186074098917	90.0894555061373	89.7813174386094	89.2194431001836	88.3148012508247	86.8891281364279	84.5625509848415	80.3983605051215	71.3511591037137	38.1441841977933
90.1571219866429	90.0602268449665	89.7511811813177	89.1876307698144	88.2802526821081	86.8501930245927	84.5162990103767	80.3385917383482	71.2601753730361	37.9085340387561
90.1281675571004	90.0309958271397	89.7210423444416	89.1558153289179	88.2456999180211	86.8112515724123	84.4700362453557	80.2788013543592	71.1691313065355	37.6723221953791
90.0992108095586	90.0017624510445	89.6909009245272	89.1239967711649	88.2111429481053	86.7723037633426	84.4237626627888	80.218989301237	71.078026739011	37.4355449752189
90.070251743249	89.9725267150313	89.6607569180843	89.0921750901929	88.1765817618728	86.7333495808128	84.3774782356541	80.1591555269884	70.9868615047912	37.198198651831
90.0412903573647	89.9432886174128	89.6306103215871	89.0603502796063	88.1420163488064	86.6943890082253	84.3311829368973	80.0992999795446	70.8956354377327	36.9602794643907
90.0123266510611	89.9140481564645	89.6004611314737	89.0285223329768	88.1074466983599	86.655422028956	84.2848767394325	80.0394226067613	70.8043483712187	36.7217836173093
89.9833606234556	89.8848053304247	89.5703093441467	88.9966912438427	88.0728727999581	86.6164486263541	84.2385596161412	79.9795233564185	70.7130001381577	36.4827072798457
89.9543922736275	89.8555601374945	89.5401549559727	88.9648570057101	88.0382946429967	86.5774687837425	84.1922315398733	79.9196021762208	70.6215905709817	36.2430465857118
89.9254216006188	89.826312575838	89.5099979632832	88.9330196120521	88.0037122168426	86.5384824844175	84.1458924834464	79.8596590137974	70.530119501645	36.0027976326733
89.8964486034331	89.7970626435819	89.4798383623737	88.9011790563094	87.9691255108339	86.4994897116491	84.0995424196466	79.7996938167019	70.4385867616229	35.7619564821453
89.8674732810368	89.7678103388162	89.4496761495048	88.86933533189	87.9345345142802	86.460490448681	84.053181321228	79.7397065324127	70.3469921819101	35.5205191587815
89.8384956323582	89.738555659594	89.4195113209015	88.83748843217	87.8999392164624	86.4214846787309	84.0068091609128	79.6796971083328	70.2553355930195	35.2784816500577
89.8095156562882	89.7092986039314	89.3893438727538	88.8056383504929	87.8653396066328	86.38247238499	83.9604259113918	79.6196654917902	70.1636168249807	35.0358399058502
89.7805333516801	89.6800391698079	89.3591738012165	88.7737850801702	87.8307356740155	86.3434535506238	83.9140315453242	79.5596116300377	70.0718357073389	34.7925898380068
89.7515487173495	89.650777355166	89.3290011024094	88.7419286144813	87.7961274078063	86.3044281587717	83.8676260353376	79.4995354702532	69.9799920691533	34.5487273199117
89.7225617520746	89.6215131579118	89.2988257724175	88.7100689466739	87.7615147971728	86.2653961925472	83.8212093540282	79.4394369595397	69.8880857389963	34.3042481860446
89.6935724545963	89.5922465759149	89.2686478072907	88.6782060699635	87.7268978312544	86.2263576350378	83.774781473961	79.3793160449257	69.7961165449518	34.0591482315314
89.6645808236179	89.5629776070081	89.2384672030446	88.6463399775343	87.6922764991625	86.1873124693057	83.7283423676697	79.3191726733649	69.7040843146141	33.8134232116887
89.6355868578053	89.5337062489879	89.2082839556598	88.6144706625385	87.6576507899808	86.1482606783871	83.681892007657	79.2590067917367	69.6119888750868	33.5670688415603
89.6065905557875	89.5044324996146	89.1780980610825	88.582598118097	87.6230206927648	86.1092022452928	83.6354303663944	79.1988183468464	69.5198300529816	33.3200807954462
89.5775919161559	89.4751563566119	89.1479095152243	88.5507223372992	87.5883861965427	86.0701371530079	83.5889574163228	79.1386072854253	69.4276076744172	33.0724547064229
89.5485909374649	89.4458778176676	89.1177183139628	88.5188433132033	87.5537472903147	86.0310653844924	83.5424731298522	79.0783735541308	69.335321565018	32.8241861658553
89.5195876182317	89.4165968804331	89.0875244531408	88.486961038836	87.5191039630537	85.9919869226808	83.495977479362	79.0181170995468	69.2429715499132	32.5752707228995
89.4905819569366	89.3873135425239	89.0573279285674	88.4550755071932	87.484456203705	85.9529017504826	83.4494704372012	78.9578378681838	69.1505574537358	32.3257038839959
89.4615739520226	89.3580278015193	89.0271287360174	88.4231867112395	87.4498040011865	85.9138098507818	83.4029519756883	78.8975358064794	69.0580791006213	32.0754811123526
89.4325636018961	89.3287396549628	88.9969268712314	88.3912946439087	87.4151473443891	85.8747112064377	83.3564220671118	78.8372108607981	68.9655363142069	31.8245978274177
89.4035509049264	89.2994491003622	88.9667223299165	88.3593992981039	87.3804862221763	85.8356058002847	83.3098806837299	78.7768629774322	68.8729289176306	31.5730494043405
89.374535859446	89.270156135189	88.9365151077457	88.3275006666971	87.3458206233846	85.7964936151322	83.2633277977712	78.7164921026015	68.7802567335302	31.3208311734213
89.3455184637508	89.2408607568796	88.9063052003582	88.2955987425301	87.3111505368235	85.7573746337648	83.2167633814343	78.6560981824541	68.6875195840425	31.0679384195477
89.3164987160996	89.2115629628344	88.8760926033599	88.2636935184139	87.2764759512755	85.7182488389428	83.1701874068885	78.5956811630665	68.5947172908023	30.8143663816181
89.287476614715	89.1822627504182	88.8458773123227	88.231784987129	87.2417968554966	85.6791162134017	83.1235998462737	78.5352409904439	68.5018496749417	30.5601102519507
89.2584521577828	89.1529601169604	88.8156593227854	88.1998731414258	87.2071132382158	85.6399767398527	83.0770006717003	78.4747776105208	68.4089165570893	30.3051651756772
89.2294253434522	89.1236550597552	88.7854386302532	88.1679579740243	87.1724250881357	85.6008304009827	83.0303898552502	78.4142909691612	68.3159177573695	30.0495262501202
89.2003961698362	89.094347576061	88.7552152301982	88.1360394776142	87.1377323939323	85.5616771794544	82.9837673689763	78.353781012159	68.2228530954019	29.7931885241535
89.1713646350111	89.0650376631013	88.7249891180591	88.1041176448554	87.1030351442551	85.5225170579064	82.9371331849027	78.2932476852388	68.1297223903004	29.5361469975429
89.142330737017	89.0357253180642	88.6947602892417	88.0721924683778	87.0683333277275	85.4833500189535	82.8904872750256	78.2326909340557	68.036525460673	29.278396620268
89.1132944738578	89.0064105381028	88.6645287391185	88.0402639407812	87.0336269329465	85.4441760451865	82.8438296113127	78.1721107041963	67.943262124621	29.0199322918217
89.0842558435012	88.9770933203351	88.6342944630293	88.0083320546359	86.9989159484831	85.4049951191725	82.797160165704	78.1115069411792	67.8499321997384	28.7607488604868
89.0552148438785	88.9477736618442	88.604057456281	87.9763968024824	86.9642003628823	85.3658072234552	82.7504789101119	78.0508795904552	67.7565355031117	28.5008411225874
89.0261714728852	88.9184515596781	88.5738177141476	87.9444581768315	86.929480164663	85.3266123405548	82.7037858164212	77.990228597408	67.6630718513196	28.2402038217137
88.9971257283808	88.8891270108502	88.5435752318708	87.9125161701648	86.8947553423185	85.2874104529679	82.6570808564898	77.9295539073549	67.5695410604322	27.9788316479173
88.9680776081886	88.8598000123391	88.5133300046592	87.8805707749343	86.8600258843162	85.2482015431685	82.6103640021486	77.8688554655471	67.4759429460111	27.716719236875
88.9390271100962	88.8304705610886	88.4830820276894	87.8486219835627	86.8252917790982	85.208985593607	82.5636352252021	77.8081332171706	67.3822773231092	27.453861169019
88.9099742318554	88.8011386540082	88.4528312961053	87.8166697884435	86.7905530150806	85.1697625867113	82.5168944974283	77.7473871073467	67.2885440062701	27.1902519686292
88.8809189711823	88.7718042879725	88.4225778050185	87.7847141819412	86.7558095806544	85.1305325048863	82.4701417905793	77.6866170811328	67.1947428095288	26.9258861028861
88.8518613257571	88.742467459822	88.3923215495084	87.7527551563912	86.7210614641855	85.0912953305146	82.4233770763816	77.6258230835228	67.1008735464107	26.6607579808792
88.8228012932247	88.7131281663627	88.3620625246224	87.7207927041	86.6863086540141	85.0520510459562	82.3766003265365	77.5650050594482	67.0069360299322	26.3948619525691
88.7937388711941	88.6837864043662	88.3318007253756	87.6888268173452	86.6515511384557	85.0127996335488	82.3298115127199	77.5041629537785	66.9129300726009	26.1281923076965
88.7646740572392	88.6544421705702	88.3015361467514	87.6568574883758	86.6167889058007	84.973541075608	82.2830106065834	77.4432967113222	66.8188554864152	25.8607432746357
88.7356068488982	88.6250954616779	88.2712687837011	87.6248847094121	86.5820219443147	84.9342753544277	82.2361975797541	77.3824062768276	66.7247120828651	25.5925090191863
88.7065372436742	88.5957462743588	88.2409986311443	87.5929084726459	86.5472502422384	84.8950024522798	82.1893724038354	77.3214915949836	66.6304996729321	25.3234836432976
88.6774652390349	88.5663946052481	88.2107256839689	87.5609287702404	86.512473787788	84.8557223514147	82.1425350504069	77.2605526104206	66.53621806709	25.0536611837195
88.6483908324129	88.5370404509473	88.1804499370311	87.5289455943307	86.4776925691551	84.8164350340614	82.0956854910253	77.1995892677112	66.4418670753048	24.7830356105735
88.6193140212055	88.5076838080242	88.1501713851558	87.4969589370236	86.4429065745069	84.7771404824276	82.0488236972242	77.1386015113716	66.3474465070356	24.5116008258347
88.5902348027751	88.4783246730124	88.1198900231361	87.4649687903975	86.4081157919863	84.7378386787003	82.0019496405153	77.0775892858619	66.2529561712353	24.2393506617181
88.5611531744491	88.4489630424124	88.089605845734	87.432975146503	86.3733202097122	84.6985296050452	81.9550632923883	77.0165525355878	66.1583958763511	23.9662788789587
88.53206913352	88.4195989126907	88.0593188476802	87.4009779973627	86.338519815779	84.6592132436079	81.9081646243112	76.9554912049013	66.0637654303251	23.6923791649755
88.5029826772454	88.3902322802805	88.0290290236743	87.3689773349713	86.3037145982577	84.6198895765132	81.8612536077313	76.8944052381017	65.9690646405959	23.4176451319072
88.4738938028483	88.3608631415815	87.9987363683845	87.3369731512958	86.2689045451951	84.5805585858659	81.8143302140755	76.8332945794369	65.8742933140986	23.142070314508
88.4448025075167	88.3314914929601	87.9684408764483	87.3049654382754	86.2340896446146	84.5412202537507	81.7673944147504	76.7721591731044	65.7794512572666	22.8656481678879
88.4157087884043	88.3021173307494	87.9381425424722	87.2729541878218	86.1992698845158	84.5018745622328	81.7204461811433	76.7109989632526	65.6845382760327	22.5883720650832
88.3866126426301	88.2727406512492	87.9078413610319	87.2409393918193	86.164445252875	84.4625214933576	81.6734854846226	76.6498138939822	65.5895541758298	22.3102352944382
88.3575140672786	88.2433614507264	87.8775373266723	87.2089210421247	86.1296157376453	84.4231610291514	81.6265122965382	76.5886039093471	65.4944987615931	22.0312310567796
88.3284130594	88.2139797254147	87.8472304339075	87.1768991305678	86.0947813267565	84.3837931516214	81.5795265882222	76.5273689533559	65.399371837761	21.7513524623609
88.2993096160101	88.184595471515	87.8169206772214	87.144873648951	86.0599420081154	84.3444178427561	81.5325283309892	76.4661089699734	65.3041732082766	21.4705925275537
88.2702037340905	88.1552086851951	87.7866080510672	87.1128445890497	86.0250977696059	84.3050350845254	81.4855174961375	76.4048239031217	65.2089026765901	21.1889441712571
88.2410954105884	88.1258193625902	87.7562925498677	87.0808119426123	85.9902485990894	84.265644858881	81.4384940549491	76.3435136966822	65.1135600456598	20.9064002109961
88.2119846424173	88.0964274998028	87.7259741680154	87.0487757013604	85.9553944844044	84.2262471477565	81.3914579786906	76.2821782944962	65.0181451179547	20.6229533586743
88.1828714264563	88.0670330929026	87.6956528998727	87.0167358569889	85.920535413367	84.186841933068	81.3444092386137	76.2208176403676	64.9226576954562	20.3385962159425
88.1537557595507	88.0376361379268	87.6653287397719	86.984692401166	85.8856713737713	84.1474291967141	81.2973478059562	76.1594316780634	64.8270975796602	20.053321269141
88.124637638512	88.0082366308802	87.635001682015	86.9526453255333	85.8508023533888	84.1080089205761	81.2502736519423	76.0980203513162	64.7314645715799	19.7671208837667
88.0955170601177	87.9788345677353	87.6046717208744	86.9205946217061	85.8159283399694	84.0685810865187	81.2031867477836	76.0365836038253	64.6357584717478	19.479987298411
88.0663940211117	87.9494299444319	87.5743388505925	86.8885402812732	85.781049321241	84.0291456763901	81.1560870646797	75.975121379259	64.5399790802186	19.1919126181071
88.0372685182042	87.920022756878	87.5440030653818	86.8564822957974	85.7461652849099	83.9897026720223	81.1089745738189	75.9136336212558	64.4441261965715	18.9028888070179
88.0081405480718	87.8906130009493	87.5136643594254	86.8244206568152	85.7112762186607	83.9502520552313	81.0618492463791	75.8521202734269	64.3481996199138	18.6129076803854
87.9790101073577	87.8612006724893	87.4833227268767	86.7923553558373	85.6763821101569	83.9107938078176	81.0147110535285	75.7905812793577	64.2521991488833	18.3219608956548
87.9498771926716	87.8317857673095	87.4529781618596	86.7602863843482	85.6414829470408	83.8713279115668	80.9675599664266	75.7290165826099	64.1561245816516	18.0300399426701
87.9207418005897	87.8023682811899	87.4226306584685	86.7282137338071	85.6065787169335	83.8318543482494	80.9203959562247	75.6674261267237	64.0599757159279	17.7371361328296
87.8916039276552	87.7729482098781	87.3922802107687	86.696137395647	85.5716694074355	83.7923730996215	80.8732189940672	75.6058098552196	63.9637523489619	17.4432405870689
87.862463570378	87.7435255490904	87.3619268127963	86.6640573612758	85.5367550061267	83.7528841474252	80.8260290510922	75.544167711601	63.8674542775478	17.1483442225238
87.8333207252347	87.7141002945113	87.3315704585579	86.6319736220758	85.5018355005663	83.7133874733889	80.7788260984326	75.482499639356	63.7710812980283	16.8524377377025
87.804175388669	87.6846724417935	87.3012111420315	86.5998861694039	85.4669108782936	83.6738830592276	80.7316101072167	75.42080558196	63.6746332062982	16.555511595973
87.7750275570918	87.6552419865586	87.2708488571661	86.5677949945919	85.4319811268274	83.6343708866437	80.6843810485697	75.3590854828781	63.5781097978089	16.2575560071393
87.7458772268808	87.6258089243964	87.2404835978816	86.5357000889466	85.397046233667	83.5948509373267	80.6371388936144	75.2973392855672	63.4815108675728	15.9585609068512
87.7167243943811	87.5963732508656	87.2101153580695	86.5036014437498	85.3621061862919	83.5553231929544	80.5898836134721	75.2355669334792	63.3848362101678	15.6585159335472
87.687569055905	87.5669349614937	87.1797441315924	86.4714990502584	85.3271609721621	83.5157876351929	80.5426151792642	75.1737683700626	63.2880856197418	15.3574104025857
87.658411207732	87.5374940517767	87.1493699122843	86.4393928997047	85.2922105787184	83.4762442456971	80.4953335621125	75.1119435387663	63.1912588900184	15.0552332771642
87.6292508461094	87.5080505171801	87.118992693951	86.4072829832963	85.2572549933826	83.4366930061114	80.448038733141	75.0500923830413	63.0943558143014	14.7519731355584
87.6000879672515	87.4786043531377	87.0886124703698	86.3751692922166	85.2222942035576	83.3971338980697	80.4007306634768	74.9882148463445	62.9973761854802	14.4476181341359
87.5709225673406	87.4491555550529	87.0582292352897	86.3430518176244	85.1873281966277	83.3575669031964	80.3534093242514	74.9263108721408	62.9003197960361	14.1421559655051
87.5417546425265	87.4197041182981	87.0278429824316	86.3109305506545	85.1523569599591	83.3179920031068	80.3060746866015	74.8643804039065	62.8031864380472	13.8355738110448
87.5125841889267	87.390250038215	86.9974537054882	86.2788054824177	85.1173804808994	83.2784091794071	80.2587267216709	74.8024233851325	62.7059759031951	13.5278582869293
87.4834112026265	87.3607933101145	86.9670613981245	86.2466766040006	85.0823987467788	83.2388184136958	80.2113654006113	74.740439759327	62.608687982771	13.2189953825923
87.4542356796792	87.3313339292771	86.9366660539772	86.2145439064662	85.0474117449095	83.1992196875636	80.1639906945839	74.6784294700192	62.5113224676819	12.9089703903793
87.4250576161061	87.3018718909526	86.9062676666557	86.1824073808541	85.0124194625865	83.1596129825939	80.1166025747605	74.6163924607624	62.413879148458	12.5977678248894
87.3958770078963	87.2724071903607	86.8758662297413	86.1502670181799	84.9774218870877	83.119998280364	80.0692010123253	74.5543286751378	62.316357815259	12.2853713302096
87.3666938510073	87.2429398226905	86.8454617367881	86.1181228094364	84.942419005674	83.0803755624452	80.0217859784759	74.4922380567575	62.2187582578818	11.9717635728717
87.3375081413649	87.213469783101	86.8150541813226	86.0859747455927	84.9074108055897	83.0407448104033	79.974357444425	74.4301205492684	62.121080265768	11.6569261179038
87.3083198748627	87.183997066721	86.7846435568437	86.0538228175951	84.8723972740629	83.0011060057997	79.926915381402	74.3679760963561	62.0233236280113	11.3408392847694
87.2791290473633	87.1545216686493	86.7542298568235	86.0216670163671	84.8373783983056	82.9614591301916	79.8794597606543	74.3058046417485	61.925488133366	11.0234819792641
87.2499356546973	87.1250435839548	86.7238130747065	85.9895073328091	84.8023541655141	82.921804165133	79.8319905534493	74.2436061292199	61.8275735702549	10.7048314965219
87.220739692664	87.0955628076763	86.6933932039104	85.9573437577993	84.767324562869	82.882141092175	79.7845077310755	74.1813805025949	61.7295797267784	10.3848632891078
87.1915411570315	87.0660793348229	86.6629702378259	85.9251762821931	84.7322895775361	82.8424698928668	79.7370112648446	74.1191277057527	61.6315063907229	10.0635506926712
87.1623400435362	87.0365931603742	86.6325441698169	85.893004896824	84.6972491966661	82.8027905487563	79.6895011260933	74.0568476826312	61.5333533495702	9.74086459967094
87.1331363478838	87.0071042792798	86.6021149932206	85.8608295925029	84.6622034073953	82.7631030413908	79.6419772861846	73.9945403772316	61.4351203905069	9.41677306912745
87.1039300657484	86.97761268646	86.5716827013474	85.8286503600193	84.6271521968457	82.7234073523178	79.5944397165101	73.9322057336227	61.3368073004346	9.09124085696874
87.0747211927732	86.9481183768058	86.5412472874814	85.7964671901405	84.5920955521255	82.6837034630857	79.5468883884917	73.8698436959458	61.2384138659791	8.76422884701544
87.0455097245707	86.9186213451785	86.5108087448803	85.7642800736124	84.5570334603293	82.6439913552447	79.4993232735835	73.8074542084191	61.1399398735018	8.43569335654187
87.0162956567221	86.8891215864105	86.4803670667754	85.7320890011595	84.5219659085386	82.6042710103473	79.4517443432738	73.7450372153426	61.04138510911	8.10558528199752
86.9870789847782	86.8596190953048	86.4499222463718	85.6998939634848	84.4868928838219	82.5645424099497	79.4041515690872	73.6825926611035	60.9427493586679	7.77384903890154
86.9578597042586	86.8301138666354	86.4194742768489	85.6676949512704	84.4518143732355	82.5248055356121	79.3565449225863	73.6201204901807	60.8440324078083	7.44042123365684
86.9286378106529	86.8006058951473	86.3890231513598	85.6354919551778	84.4167303638234	82.4850603688997	79.3089243753746	73.5576206471507	60.7452340419443	7.1052289818047
86.8994132994196	86.7710951755567	86.3585688630319	85.6032849658472	84.3816408426179	82.4453068913839	79.2612898990979	73.4950930766924	60.6463540462813	6.76818775349534
86.870186165987	86.7415817025509	86.3281114049669	85.5710739738989	84.3465457966401	82.4055450846428	79.2136414654469	73.4325377235931	60.5473922058301	6.42919857697574
86.840956405753	86.7120654707886	86.2976507702411	85.5388589699324	84.3114452129001	82.3657749302623	79.1659790461596	73.3699545327537	60.448348305419	6.08814435529463
86.8117240140853	86.6825464748998	86.2671869519051	85.5066399445275	84.2763390783975	82.3259964098372	79.1183026130235	73.307343449195	60.3492221297083	5.74488493430809
86.7824889863211	86.653024709486	86.2367199429843	85.4744168882439	84.2412273801218	82.2862095049721	79.0706121378778	73.2447044180632	60.2500134632028	5.3992503737215
86.7532513177678	86.6235001691204	86.206249736479	85.4421897916215	84.206110105053	82.2464141972823	79.0229075926165	73.1820373846365	60.1507220902673	5.05103156727211
86.7240110037027	86.5939728483478	86.1757763253642	85.409958645181	84.1709872401616	82.206610468395	78.9751889491904	73.1193422943309	60.0513477951406	4.69996683918155
86.6947680393731	86.5644427416847	86.1452997025901	85.3777234394236	84.1358587724095	82.1667982999501	78.9274561796098	73.0566190927071	59.9518903619509	4.34572222665837
86.6655224199963	86.5349098436198	86.1148198610822	85.3454841648317	84.1007246887504	82.1269776736018	78.8797092559473	72.9938677254764	59.8523495747321	3.98786145860903
86.6362741407602	86.5053741486133	86.0843367937411	85.3132408118686	84.0655849761301	82.0871485710192	78.8319481503407	72.9310881385085	59.7527252174397	3.6257983105326
86.6070231968228	86.475835651098	86.0538504934431	85.2809933709792	84.030439621487	82.0473109738876	78.7841728349952	72.8682802778376	59.6530170739683	3.2587170328259
86.5777695833124	86.4462943454784	86.0233609530399	85.2487418325901	83.9952886117527	82.00746486391	78.7363832821871	72.80544408967	59.5532249281699	2.88543062345617
86.548513295328	86.4167502261317	85.9928681653589	85.2164861871095	83.9601319338524	81.9676102228078	78.6885794642662	72.7425795203914	59.4533485638725	2.50410626230116
86.5192543279392	86.3872032874071	85.9623721232036	85.1842264249281	83.9249695747058	81.9277470323223	78.6407613536589	72.6796865165746	59.3533877649004	2.11166856532061
86.4899926761862	86.3576535236266	85.9318728193534	85.1519625364187	83.8898015212269	81.8878752742161	78.5929289228716	72.6167650249872	59.2533423150956	1.70226388733573
86.46072833508	86.3281009290847	85.9013702465638	85.1196945119369	83.8546277603252	81.8479949302742	78.5450821444934	72.5538149926001	59.1532119983414	1.26202926703035
86.4314612996023	86.2985454980485	85.8708643975667	85.0874223418212	83.8194482789062	81.8081059823052	78.4972209912	72.4908363665955	59.0529965985877	0.735840354528825
86.4021915647062	86.268987224758	85.8403552650704	85.0551460163931	83.7842630638714	81.7682084121432	78.4493454357567	72.4278290943767	58.9526958998796	0
86.3729191253153	86.2394261034262	85.8098428417599	85.0228655259577	83.7490721021196	81.7283022016486	78.4014554510218	72.3647931235764	58.8523096863877	0
86.3436439763248	86.2098621282389	85.7793271202968	84.9905808608038	83.7138753805473	81.6883873327098	78.3535510099506	72.3017284020675	58.751837742982	0
86.3143661126009	86.1802952933552	85.7488080933198	84.958292011204	83.6786728860489	81.6484637872449	78.3056320855987	72.2386348779953	58.6512798543413	0
86.2850855289812	86.1507255929073	85.7182857534444	84.9259989674155	83.6434646055179	81.6085315472028	78.257698651127	72.1755124997705	58.5506358060334	0
86.2558022202746	86.1211530210009	85.6877600932638	84.8937017196799	83.6082505258472	81.568590594565	78.2097506798056	72.1123612161077	58.4499053839629	0
86.2265161812619	86.0915775717152	85.6572311053481	84.8614002582236	83.5730306339299	81.5286409113473	78.1617881450188	72.0491809760369	58.3490883739754	0
86.197227406695	86.0619992391027	85.6266987822453	84.8290945732583	83.53780491666	81.4886824796015	78.1138110202708	71.9859717288985	58.2481845615723	0
86.1679358912981	86.0324180171899	85.5961631164811	84.7967846549813	83.502573360933	81.4487152814168	78.06581927919	71.9227334243268	58.1471937317066	0
86.1386416297666	86.0028338999769	85.5656241005588	84.7644704935755	83.4673359536467	81.4087392989224	78.0178128955331	71.8594660122281	58.0461156686359	0
86.1093446167683	85.9732468814379	85.5350817269603	84.7321520792102	83.4320926817019	81.3687545142884	77.9697918431878	71.7961694427544	57.944950155817	0
86.0800448469428	85.943656955521	85.5045359881453	84.6998294020409	83.3968435320032	81.3287609097287	77.9217560961747	71.7328436662768	57.8436969758307	0
86.0507423149019	85.9140641161485	85.4739868765522	84.6675024522103	83.3615884914599	81.2887584675018	77.8737056286477	71.6694886333584	57.7423559103271	0
86.0214370152295	85.884468357217	85.4434343845979	84.6351712198479	83.3263275469864	81.2487471699132	77.8256404148941	71.6061042947276	57.6409267399869	0
85.992128942482	85.8548696725977	85.4128785046782	84.6028356950711	83.2910606855034	81.208726999317	77.7775604293335	71.5426906012537	57.5394092444938	0
85.9628180911881	85.825268056136	85.3823192291678	84.5704958679851	83.2557878939388	81.168697938117	77.729465646516	71.4792475039234	57.4378032025145	0
85.9335044558491	85.7956635016521	85.3517565504208	84.5381517286833	83.220509159228	81.1286599687686	77.6813560411195	71.4157749538191	57.3361083916843	0
85.9041880309389	85.7660560029412	85.3211904607705	84.5058032672479	83.1852244683153	81.0886130737797	77.6332315879473	71.3522729020991	57.2343245885967	0
85.874868810904	85.736445553773	85.2906209525299	84.4734504737501	83.1499338081544	81.0485572357122	77.5850922619241	71.2887412999795	57.1324515687965	0
85.8455467901641	85.7068321478927	85.2600480179917	84.4410933382507	83.1146371657095	81.0084924371824	77.5369380380931	71.2251800987174	57.0304891067739	0
85.8162219631115	85.6772157790204	85.2294716494287	84.4087318508002	83.0793345279557	80.9684186608623	77.4887688916113	71.1615892495959	56.9284369759606	0
85.7868943241117	85.6475964408515	85.1988918390939	84.3763660014397	83.0440258818803	80.9283358894801	77.4405847977456	71.0979687039104	56.8262949487269	0
85.7575638675035	85.6179741270571	85.1683085792208	84.3439957802006	83.0087112144831	80.8882441058205	77.392385731869	71.0343184129562	56.7240627963796	0
85.7282305875988	85.5883488312838	85.1377218620235	84.3116211771059	82.9733905127778	80.8481432927255	77.3441716694554	70.9706383280169	56.6217402891593	0
85.6988944786829	85.5587205471537	85.107131679697	84.2792421821699	82.9380637637919	80.8080334330943	77.2959425860761	70.9069284003547	56.5193271962396	0
85.6695555350149	85.5290892682651	85.0765380244174	84.2468587853988	82.9027309545683	80.7679145098834	77.2476984573946	70.8431885812007	56.4168232857252	0
85.6402137508271	85.4994549881921	85.0459408883423	84.2144709767917	82.8673920721655	80.7277865061068	77.1994392591628	70.7794188217466	56.3142283246504	0
85.6108691203259	85.4698177004852	85.0153402636106	84.1820787463401	82.8320471036583	80.6876494048357	77.1511649672165	70.7156190731369	56.2115420789779	0
85.5815216376913	85.4401773986709	84.9847361423432	84.1496820840291	82.7966960361386	80.6475031891981	77.1028755574712	70.6517892864621	56.1087643135973	0
85.5521712970775	85.4105340762526	84.9541285166432	84.1172809798375	82.7613388567159	80.6073478423789	77.0545710059177	70.5879294127522	56.0058947923236	0
85.5228180926127	85.3808877267099	84.9235173785956	84.0848754237383	82.7259755525178	80.5671833476192	77.0062512886184	70.524039402971	55.9029332778956	0
85.4934620183994	85.3512383434994	84.8929027202686	84.0524654056991	82.6906061106908	80.5270096882157	76.9579163817031	70.4601192080107	55.7998795319742	0
85.4641030685142	85.3215859200546	84.8622845337125	84.0200509156827	82.6552305184006	80.4868268475202	76.909566261365	70.396168778687	55.6967333151409	0
85.4347412370085	85.2919304497862	84.8316628109613	83.9876319436474	82.6198487628327	80.4466348089392	76.8612009038574	70.3321880657349	55.5934943868954	0
85.4053765179081	85.2622719260819	84.8010375440319	83.9552084795473	82.5844608311926	80.4064335559327	76.8128202854898	70.2681770198044	55.4901625056543	0
85.3760089052135	85.232610342307	84.7704087249249	83.922780513333	82.5490667107066	80.3662230720138	76.7644243826242	70.2041355914567	55.3867374287483	0
85.3466383929003	85.2029456918045	84.7397763456251	83.8903480349519	82.5136663886216	80.3260033407479	76.7160131716723	70.1400637311609	55.2832189124208	0
85.3172649749189	85.1732779678948	84.7091403981008	83.8579110343485	82.4782598522062	80.2857743457515	76.6675866290915	70.0759613892909	55.1796067118247	0
85.2878886451947	85.1436071638767	84.6785008743053	83.8254695014653	82.4428470887504	80.2455360706918	76.6191447313824	70.011828516122	55.0759005810206	0
85.2585093976285	85.1139332730267	84.6478577661762	83.7930234262423	82.407428085566	80.2052884992851	76.5706874550854	69.9476650618288	54.972100272974	0
85.2291272260966	85.0842562885997	84.6172110656362	83.7605727986183	82.3720028299869	80.1650316152968	76.5222147767779	69.883470976482	54.8682055395529	0
85.1997421244507	85.0545762038293	84.586560764593	83.7281176085307	82.3365713093696	80.1247654025394	76.4737266730713	69.8192462100468	54.7642161315247	0
85.170354086518	85.0248930119273	84.5559068549401	83.6956578459164	82.3011335110928	80.0844898448723	76.4252231206088	69.7549907123798	54.6601317985537	0
85.1409631061019	84.9952067060847	84.5252493285565	83.6631935007116	82.2656894225579	80.0442049262002	76.3767040960623	69.690704433228	54.5559522891978	0
85.1115691769814	84.9655172794712	84.4945881773074	83.6307245628525	82.2302390311891	80.0039106304728	76.3281695761301	69.626387322226	54.4516773509058	0
85.0821722929117	84.935824725236	84.4639233930442	83.5982510222756	82.1947823244336	79.9636069416829	76.2796195375344	69.5620393288946	54.3473067300142	0
85.0527724476244	84.9061290365073	84.433254967605	83.5657728689182	82.1593192897615	79.9232938438661	76.2310539570193	69.4976604026392	54.2428401717437	0
85.0233696348272	84.8764302063933	84.4025828928147	83.5332900927184	82.1238499146656	79.8829713210994	76.1824728113481	69.4332504927481	54.1382774201963	0
84.9939638482046	84.8467282279815	84.3719071604852	83.5008026836156	82.0883741866621	79.8426393575002	76.1338760773016	69.3688095483911	54.0336182183514	0
84.9645550814176	84.8170230943397	84.3412277624161	83.468310631551	82.0528920932901	79.8022979372254	76.085263731676	69.304337518618	53.9288623080628	0
84.9351433281042	84.7873147985157	84.3105446903946	83.4358139264675	82.0174036221116	79.7619470444702	76.0366357512806	69.2398343523573	53.8240094300549	0
84.9057285818792	84.7576033335376	84.2798579361957	83.4033125583105	81.9819087607116	79.7215866634671	75.9879921129362	69.1752999984153	53.719059323919	0
84.8763108363349	84.7278886924141	84.2491674915828	83.3708065170276	81.946407496698	79.6812167784852	75.9393327934734	69.1107344054742	53.6140117281096	0
84.8468900850404	84.6981708681347	84.2184733483078	83.3382957925694	81.9108998177016	79.6408373738286	75.8906577697305	69.0461375220918	53.5088663799407	0
84.8174663215428	84.6684498536698	84.1877754981114	83.3057803748897	81.8753857113756	79.600448433836	75.8419670185521	68.9815092967	53.4036230155817	0
84.7880395393665	84.6387256419707	84.1570739327233	83.2732602539452	81.8398651653962	79.5600499428792	75.7932605167873	68.9168496776036	53.2982813700537	0
84.7586097320139	84.6089982259705	84.1263686438625	83.2407354196965	81.8043381674619	79.5196418853626	75.7445382412882	68.8521586129799	53.1928411772254	0
84.7291768929652	84.5792675985834	84.0956596232377	83.208205862108	81.7688047052934	79.4792242457219	75.6958001689088	68.7874360508773	53.0873021698086	0
84.6997410156787	84.5495337527057	84.0649468625472	83.1756715711478	81.7332647666337	79.4387970084229	75.6470462765026	68.7226819392148	52.9816640793547	0
84.6703020935914	84.5197966812155	84.0342303534798	83.1431325367887	81.6977183392479	79.3983601579614	75.5982765409225	68.6578962257806	52.8759266362499	0
84.6408601201182	84.490056376973	84.0035100877143	83.1105887490076	81.6621654109226	79.3579136788614	75.5494909390182	68.5930788582321	52.7700895697112	0
84.6114150886531	84.460312832821	83.9727860569202	83.0780401977862	81.6266059694663	79.3174575556747	75.5006894476358	68.5282297840943	52.664152607782	0
84.5819669925687	84.4305660415846	83.9420582527581	83.0454868731109	81.5910400027088	79.2769917729796	75.4518720436162	68.4633489507596	52.5581154773275	0
84.5525158252167	84.400815996072	83.9113266668795	83.0129287649733	81.5554674985012	79.2365163153805	75.403038703794	68.3984363054868	52.4519779040302	0
84.5230615799278	84.3710626890742	83.8805912909273	82.98036586337	81.5198884447154	79.1960311675065	75.3541894049962	68.3334917954006	52.3457396123856	0
84.4936042500123	84.3413061133654	83.8498521165361	82.9477981583031	81.4843028292442	79.155536314011	75.3053241240414	68.2685153674909	52.2394003256974	0
84.4641438287598	84.3115462617035	83.8191091353322	82.9152256397799	81.4487106400007	79.1150317395706	75.2564428377384	68.2035069686118	52.1329597660726	0
84.4346803094398	84.2817831268296	83.7883623389342	82.8826482978136	81.4131118649186	79.0745174288842	75.2075455228853	68.1384665454815	52.0264176544174	0
84.4052136853015	84.2520167014691	83.7576117189528	82.8500661224231	81.3775064919514	79.0339933666724	75.1586321562685	68.0733940446812	51.9197737104315	0
84.3757439495744	84.2222469783311	83.7268572669915	82.817479103633	81.3418945090722	78.9934595376765	75.1097027146618	68.008289412655	51.8130276526041	0
84.3462710954681	84.1924739501093	83.6960989746463	82.7848872314742	81.3062759042739	78.9529159266579	75.0607571748253	67.9431525957088	51.7061791982084	0
84.3167951161726	84.1626976094816	83.6653368335065	82.7522904959834	81.2706506655684	78.9123625183972	75.0117955135047	67.87798354001	51.5992280632968	0
84.2873160048587	84.1329179491108	83.6345708351543	82.7196888872037	81.2350187809866	78.8717992976934	74.9628177074303	67.812782191587	51.4921739626962	0
84.2578337546779	84.1031349616445	83.6038009711658	82.6870823951844	81.199380238578	78.8312262493633	74.9138237333163	67.7475484963285	51.3850166100024	0
84.2283483587628	84.0733486397153	83.5730272331102	82.6544710099811	81.1637350264107	78.7906433582406	74.8648135678595	67.6822823999831	51.2777557175753	0
84.1988598102271	84.0435589759416	83.542249612551	82.621854721656	81.1280831325706	78.7500506091754	74.8157871877393	67.6169838481586	51.1703909965334	0
84.169368102166	84.0137659629267	83.5114681010456	82.5892335202778	81.0924245451616	78.7094479870333	74.7667445696163	67.5516527863215	51.0629221567491	0
84.1398732276562	83.9839695932602	83.4806826901455	82.5566073959217	81.0567592523051	78.6688354766948	74.7176856901319	67.486289159797	50.955348906843	0
84.1103751797561	83.9541698595173	83.4498933713971	82.5239763386696	81.0210872421398	78.6282130630545	74.6686105259073	67.4208929137675	50.8476709541785	0
84.0808739515062	83.9243667542595	83.419100136341	82.4913403386101	80.9854085028211	78.5875807310207	74.619519053543	67.3554639932731	50.7398880048568	0
84.0513695359292	83.8945602700346	83.388302976513	82.4586993858384	80.9497230225213	78.5469384655144	74.5704112496182	67.2900023432107	50.631999763711	0
84.02186192603	83.8647503993772	83.3575018834436	82.4260534704567	80.9140307894289	78.506286251469	74.52128709069	67.2245079083333	50.5240059343011	0
83.9923511147961	83.8349371348084	83.3266968486589	82.3934025825737	80.8783317917487	78.4656240738296	74.4721465532927	67.1589806332499	50.4159062189079	0
83.9628370951977	83.8051204688365	83.29588786368	82.3607467123053	80.8426260177009	78.4249519175521	74.4229896139373	67.0934204624249	50.307700318528	0
83.9333198601882	83.7753003939568	83.2650749200238	82.328085849774	80.8069134555214	78.3842697676029	74.3738162491109	67.0278273401777	50.1993879328677	0
83.9037994027037	83.7454769026522	83.234258009203	82.2954199851092	80.7711940934612	78.3435776089582	74.3246264352762	66.9622012106821	50.0909687603376	0
83.874275715664	83.7156499873929	83.203437122726	82.2627491084471	80.7354679197864	78.3028754266037	74.2754201488707	66.8965420179658	49.9824424980466	0
83.8447487919722	83.6858196406373	83.1726122520975	82.230073209931	80.6997349227772	78.2621632055333	74.2261973663064	66.8308497059103	49.8738088417966	0
83.8152186245152	83.6559858548315	83.141783388818	82.1973922797109	80.6639950907285	78.2214409307496	74.1769580639689	66.7651242182502	49.7650674860762	0
83.7856852061639	83.6261486224098	83.110950524385	82.1647063079436	80.6282484119492	78.1807085872622	74.1277022182174	66.6993654985725	49.6562181240549	0
83.7561485297731	83.596307935795	83.080113650292	82.132015284793	80.5924948747615	78.1399661600883	74.0784298053837	66.6335734903169	49.5472604475774	0
83.7266085881822	83.5664637873984	83.0492727580295	82.0993192004297	80.5567344675014	78.0992136342512	74.0291408017722	66.5677481367745	49.4381941471577	0
83.6970653742147	83.5366161696201	83.0184278390847	82.0666180450312	80.5209671785179	78.0584509947806	73.9798351836589	66.5018893810881	49.3290189119726	0
83.6675188806792	83.5067650748492	82.9875788849417	82.0339118087817	80.4851929961728	78.0176782267114	73.9305129272913	66.4359971662513	49.2197344298562	0
83.6379691003689	83.4769104954638	82.9567258870819	82.0012004818724	80.4494119088405	77.9768953150837	73.8811740088878	66.370071435108	49.1103403872935	0
83.6084160260624	83.4470524238316	82.9258688369837	81.9684840545009	80.4136239049074	77.9361022449421	73.8318184046371	66.3041121303526	49.0008364694145	0
83.5788596505232	83.4171908523095	82.8950077261231	81.935762516872	80.3778289727724	77.8952990013354	73.7824460906982	66.2381191945288	48.8912223599877	0
83.5492999665006	83.3873257732445	82.8641425459733	81.9030358591969	80.3420271008455	77.8544855693159	73.7330570431997	66.1720925700297	48.781497741414	0
83.5197369667294	83.3574571789731	82.8332732880055	81.8703040716934	80.3062182775484	77.813661933939	73.6836512382391	66.1060321990971	48.6716622947206	0
83.4901706439303	83.3275850618222	82.8023999436883	81.8375671445861	80.270402491314	77.772828080263	73.6342286518832	66.0399380238213	48.5617156995546	0
83.46060099081	83.2977094141087	82.7715225044883	81.804825068106	80.2345797305858	77.7319839933484	73.5847892601667	65.9738099861404	48.4516576341764	0
83.4310280000617	83.2678302281401	82.7406409618701	81.7720778324909	80.1987499838182	77.6911296582574	73.5353330390928	65.9076480278401	48.3414877754537	0
83.4014516643647	83.2379474962144	82.7097553072962	81.7393254279848	80.1629132394756	77.6502650600539	73.4858599646319	65.8414520905532	48.2312057988548	0
83.3718719763851	83.2080612106205	82.6788655322275	81.7065678448382	80.1270694860325	77.6093901838028	73.436370012722	65.775222115759	48.1208113784421	0
83.3422889287758	83.1781713636381	82.6479716281231	81.6738050733079	80.0912187119732	77.5685050145694	73.3868631592679	65.7089580447833	48.0103041868658	0
83.3127025141767	83.1482779475383	82.6170735864403	81.6410371036573	80.0553609057916	77.5276095374195	73.3373393801409	65.6426598187976	47.899683895357	0
83.283112725215	83.1183809545831	82.5861713986352	81.6082639261557	80.0194960559907	77.4867037374185	73.2877986511787	65.5763273788186	47.7889501737215	0
83.2535195545051	83.0884803770263	82.5552650561623	81.5754855310787	79.9836241510825	77.4457875996313	73.2382409481848	65.5099606657083	47.6781026903329	0
83.223922994649	83.0585762071132	82.5243545504747	81.5427019087082	79.9477451795877	77.4048611091222	73.1886662469282	65.4435596201731	47.5671411121257	0
83.1943230382367	83.0286684370808	82.4934398730244	81.509913049332	79.9118591300354	77.3639242509539	73.1390745231433	65.3771241827634	47.456065104589	0
83.1647196778458	82.9987570591581	82.4625210152622	81.4771189432438	79.8759659909631	77.3229770101874	73.0894657525292	65.3106542938733	47.3448743317596	0
83.1351129060422	82.9688420655663	82.4315979686379	81.4443195807435	79.840065750916	77.282019371882	73.0398399107498	65.2441498937404	47.2335684562149	0
83.1055027153802	82.9389234485189	82.4006707246	81.4115149521366	79.8041583984471	77.2410513210945	72.9901969734332	65.1776109224449	47.1221471390665	0
83.0758890984022	82.9090012002215	82.3697392745964	81.3787050477346	79.768243922117	77.2000728428791	72.9405369161716	65.1110373199093	47.0106100399529	0
83.0462720476398	82.8790753128726	82.3388036100741	81.3458898578546	79.7323223104932	77.1590839222868	72.8908597145207	65.0444290258984	46.8989568170328	0
83.016651555613	82.8491457786633	82.3078637224792	81.3130693728193	79.6963935521505	77.1180845443655	72.841165344	64.9777859800182	46.7871871269781	0
82.987027614831	82.8192125897775	82.2769196032572	81.2802435829571	79.6604576356701	77.0770746941594	72.7914537800917	64.9111081217161	46.6753006249667	0
82.9574002177922	82.7892757383923	82.245971243853	81.2474124786017	79.62451454964	77.0360543567085	72.7417249982413	64.8443953902798	46.5632969646758	0
82.9277693569843	82.7593352166777	82.2150186357107	81.2145760500924	79.5885642826541	76.9950235170488	72.6919789738565	64.7776477248376	46.4511757982745	0
82.8981350248846	82.7293910167973	82.1840617702741	81.1817342877738	79.5526068233128	76.9539821602117	72.6422156823077	64.7108650643573	46.3389367764166	0
82.8684972139602	82.6994431309079	82.1531006389866	81.1488871819956	79.5166421602217	76.9129302712235	72.5924350989271	64.6440473476463	46.2265795482339	0
82.8388559166679	82.66949155116	82.1221352332911	81.1160347231129	79.4806702819926	76.8718678351054	72.5426371990088	64.5771945133507	46.1141037613285	0
82.8092111254546	82.6395362696978	82.0911655446301	81.0831769014857	79.444691177242	76.8307948368734	72.4928219578085	64.5103064999552	46.0015090617658	0
82.7795628327575	82.6095772786593	82.0601915644459	81.0503137074791	79.4087048345921	76.7897112615372	72.4429893505432	64.4433832457825	45.888795094067	0
82.7499110310041	82.5796145701766	82.0292132841805	81.0174451314631	79.3727112426696	76.7486170941011	72.3931393523908	64.3764246889929	45.7759615012022	0
82.7202557126124	82.5496481363758	81.9982306952759	80.9845711638126	79.3367103901061	76.7075123195627	72.3432719384902	64.3094307675839	45.6630079245824	0
82.6905968699913	82.5196779693773	81.9672437891738	80.9516917949072	79.3007022655375	76.666396922913	72.2933870839408	64.2424014193895	45.5499340040529	0
82.6609344955405	82.4897040612958	81.9362525573157	80.9188070151312	79.264686857604	76.6252708891365	72.2434847638025	64.1753365820801	45.4367393778849	0
82.6312685816506	82.4597264042405	81.9052569911432	80.8859168148734	79.2286641549501	76.5841342032104	72.193564953095	64.108236193162	45.323423682769	0
82.6015991207034	82.4297449903155	81.8742570820981	80.8530211845273	79.1926341462237	76.5429868501044	72.1436276267981	64.0411001899765	45.2099865538069	0
82.5719261050723	82.3997598116192	81.8432528216217	80.8201201144906	79.1565968200767	76.5018288147809	72.0936727598514	63.9739285097003	45.0964276245045	0
82.5422495271219	82.3697708602451	81.8122442011558	80.7872135951656	79.1205521651642	76.4606600821942	72.0437003271535	63.906721089344	44.9827465267636	0
82.5125693792087	82.3397781282816	81.7812312121421	80.7543016169585	79.0845001701446	76.4194806372907	71.9937103035628	63.8394778657526	44.868942890875	0
82.4828856536807	82.3097816078123	81.7502138460226	80.7213841702799	79.0484408236794	76.3782904650084	71.9437026638961	63.7721987756043	44.7550163455102	0
82.4531983428781	82.2797812909159	81.7191920942392	80.6884612455445	79.0123741144328	76.3370895502767	71.8936773829295	63.7048837554107	44.6409665177143	0
82.4235074391332	82.2497771696664	81.6881659482342	80.6555328331708	78.9763000310717	76.2958778780163	71.8436344353975	63.6375327415157	44.5267930328978	0
82.3938129347704	82.2197692361332	81.65713539945	80.6225989235813	78.9402185622656	76.2546554331389	71.7935737959928	63.5701456700954	44.4124955148291	0
82.3641148221066	82.1897574823814	81.6261004393295	80.5896595072024	78.904129696686	76.2134222005467	71.7434954393667	63.5027224771578	44.2980735856264	0
82.3344130934512	82.1597419004715	81.5950610593154	80.556714574464	78.8680334230067	76.1721781651328	71.6933993401279	63.4352630985417	44.1835268657503	0
82.3047077411063	82.1297224824599	81.5640172508512	80.5237641157999	78.8319297299031	76.1309233117804	71.6432854728435	63.3677674699171	44.0688549739956	0
82.2749987573667	82.0996992203986	81.5329690053804	80.4908081216472	78.7958186060527	76.0896576253628	71.5931538120376	63.3002355267838	43.9540575274834	0
82.2452861345204	82.069672106336	81.5019163143469	80.4578465824465	78.7597000401342	76.0483810907434	71.5430043321922	63.2326672044718	43.8391341416534	0
82.2155698648481	82.039641132316	81.470859169195	80.4248794886421	78.7235740208277	76.0070936927751	71.4928370077461	63.16506243814	43.7240844302556	0
82.1858499406242	82.0096062903789	81.4397975613693	80.3919068306811	78.6874405368147	75.9657954163004	71.4426518130953	63.0974211627766	43.6089080053425	0
82.1561263541161	81.9795675725613	81.4087314823149	80.3589285990141	78.6512995767774	75.9244862461509	71.3924487225925	63.0297433131977	43.493604477261	0
82.1263990975848	81.9495249708959	81.3776609234772	80.3259447840946	78.615151129399	75.8831661671477	71.3422277105471	62.9620288240475	43.3781734546444	0
82.0966681632849	81.9194784774119	81.346585876302	80.2929553763795	78.5789951833633	75.8418351641003	71.291988751225	62.8942776297976	43.262614544404	0
82.0669335434648	81.8894280841351	81.3155063322358	80.2599603663281	78.5428317273546	75.8004932218073	71.2417318188483	62.8264896647466	43.1469273517215	0
82.0371952303668	81.8593737830877	81.2844222827251	80.226959744403	78.5066607500575	75.7591403250556	71.191456887595	62.7586648630191	43.0311114800402	0
82.0074532162268	81.8293155662887	81.2533337192171	80.1939535010694	78.4704822401567	75.7177764586206	71.1411639315994	62.6908031585662	42.9151665310572	0
81.9777074932755	81.7992534257538	81.2222406331595	80.160941626795	78.4342961863371	75.6764016072658	71.0908529249511	62.622904485164	42.799092104715	0
81.9479580537372	81.7691873534954	81.1911430160003	80.1279241120504	78.3981025772832	75.6350157557426	71.0405238416956	62.5549687764137	42.6828877991934	0
81.918204889831	81.7391173415231	81.1600408591882	80.0949009473084	78.3619014016793	75.5936188887902	70.9901766558336	62.486995965741	42.566553210901	0
81.8884479937701	81.7090433818431	81.128934154172	80.0618721230445	78.3256926482092	75.5522109911357	70.9398113413209	62.4189859863953	42.4500879344668	0
81.8586873577626	81.6789654664592	81.0978228924015	80.0288376297362	78.2894763055561	75.5107920474933	70.8894278720686	62.3509387714499	42.3334915627322	0
81.8289229740111	81.6488835873718	81.0667070653264	79.9957974578636	78.2532523624022	75.4693620425646	70.8390262219425	62.2828542538006	42.2167636867423	0
81.799154834713	81.6187977365788	81.0355866643974	79.9627515979087	78.2170208074291	75.4279209610385	70.7886063647631	62.2147323661658	42.0999038957375	0
81.7693829320609	81.5887079060754	81.0044616810654	79.9297000403556	78.1807816293171	75.3864687875906	70.7381682743055	62.146573041086	41.9829117771453	0
81.739607258242	81.558614087854	80.9733321067817	79.8966427756906	78.1445348167452	75.3450055068833	70.687711924299	62.0783762109229	41.8657869165713	0
81.7098278054389	81.5285162739046	80.9421979329984	79.8635797944015	78.1082803583912	75.303531103566	70.6372372884274	62.0101418078591	41.7485288977913	0
81.6800445658295	81.4984144562145	80.9110591511678	79.8305110869783	78.0720182429313	75.2620455622741	70.5867443403282	61.9418697638979	41.6311373027425	0
81.6502575315868	81.4683086267688	80.8799157527429	79.7974366439126	78.0357484590401	75.2205488676295	70.5362330535931	61.8735600108621	41.5136117115148	0
81.6204666948794	81.43819877755	80.8487677291769	79.7643564556977	77.9994709953901	75.1790410042405	70.4857034017673	61.8052124803942	41.3959517023423	0
81.5906720478714	81.4080849005384	80.8176150719237	79.7312705128282	77.9631858406523	75.137521956701	70.4351553583495	61.7368271039553	41.2781568515948	0
81.5608735827226	81.377966987712	80.7864577724376	79.6981788058006	77.9268929834953	75.0959917095911	70.3845888967922	61.6684038128251	41.1602267337692	0
81.5310712915885	81.3478450310466	80.7552958221733	79.6650813251126	77.8905924125855	75.0544502474764	70.3340039905007	61.5999425381008	41.0421609214805	0
81.5012651666204	81.317719022516	80.7241292125861	79.631978061263	77.854284116587	75.0128975549083	70.2834006128335	61.5314432106971	40.9239589854534	0
81.4714551999655	81.2875889540918	80.6929579351315	79.5988690047523	77.8179680841615	74.9713336164234	70.2327787371023	61.4629057613454	40.8056204945134	0
81.4416413837671	81.2574548177435	80.6617819812656	79.5657541460818	77.781644303968	74.9297584165436	70.1821383365713	61.3943301205933	40.6871450155785	0
81.4118237101646	81.2273166054387	80.630601342445	79.5326334757541	77.7453127646628	74.8881719397762	70.1314793844575	61.3257162188042	40.5685321136496	0
81.3820021712935	81.1971743091433	80.5994160101265	79.4995069842727	77.7089734548991	74.8465741706133	70.0808018539302	61.2570639861564	40.4497813518027	0
81.3521767592857	81.167027920821	80.5682259757674	79.4663746621418	77.6726263633274	74.8049650935319	70.0301057181112	61.1883733526431	40.3308922911791	0
81.3223474662694	81.1368774324339	80.5370312308255	79.433236499867	77.6362714785949	74.7633446929937	69.9793909500744	61.1196442480714	40.2118644909776	0
81.2925142843692	81.1067228359422	80.5058317667588	79.400092487954	77.5999087893456	74.7217129534452	69.9286575228458	61.0508766020621	40.0926975084446	0
81.2626772057063	81.0765641233045	80.4746275750258	79.3669426169098	77.5635382842202	74.6800698593171	69.8779054094032	60.9820703440488	39.9733908988662	0
81.2328362223986	81.0464012864776	80.4434186470853	79.3337868772414	77.5271599518557	74.6384153950248	69.8271345826761	60.9132254032778	39.8539442155586	0
81.2029913265605	81.0162343174169	80.4122049743964	79.3006252594569	77.4907737808856	74.5967495449675	69.7763450155459	60.8443417088071	39.7343570098594	0
81.1731425103034	80.9860632080759	80.3809865484186	79.2674577540645	77.4543797599398	74.5550722935289	69.725536680845	60.7754191895061	39.6146288311189	0
81.1432897657352	80.9558879504069	80.3497633606117	79.2342843515728	77.4179778776442	74.5133836250763	69.6747095513573	60.706457774055	39.4947592266908	0
81.1134330849611	80.9257085363604	80.3185354024358	79.2011050424908	77.3815681226206	74.4716835239612	69.6238635998181	60.6374573909445	39.3747477419236	0
81.083572460083	80.8955249578856	80.2873026653512	79.1679198173276	77.3451504834871	74.4299719745186	69.5729987989132	60.5684179684745	39.2545939201513	0
81.0537078832	80.8653372069303	80.2560651408185	79.1347286665927	77.3087249488572	74.3882489610672	69.5221151212798	60.4993394347545	39.1342973026844	0
81.0238393464085	80.8351452754408	80.2248228202986	79.1015315807954	77.2722915073404	74.346514467909	69.4712125395055	60.4302217177023	39.0138574288013	0
80.9939668418016	80.8049491553622	80.1935756952526	79.068328550445	77.2358501475417	74.3047684793297	69.4202910261286	60.3610647450437	38.8932738357389	0
80.9640903614703	80.7747488386382	80.1623237571419	79.0351195660509	77.1994008580615	74.263010979598	69.3693505536377	60.2918684443123	38.7725460586834	0
80.9342098975024	80.7445443172111	80.1310669974278	79.0019046181222	77.1629436274955	74.2212419529658	69.3183910944719	60.2226327428481	38.6516736307619	0
80.9043254419834	80.7143355830223	80.0998054075721	78.9686836971679	77.126478444435	74.179461383668	69.2674126210206	60.1533575677977	38.5306560830327	0
80.8744369869962	80.6841226280116	80.0685389790365	78.9354567936966	77.0900052974661	74.1376692559226	69.2164151056227	60.0840428461134	38.4094929444766	0
80.8445445246211	80.653905444118	80.037267703283	78.9022238982166	77.0535241751701	74.0958655539302	69.1653985205675	60.0146885045525	38.2881837419877	0
80.8146480469362	80.6236840232789	80.0059915717738	78.8689850012357	77.0170350661232	74.0540502618741	69.1143628380939	59.9452944696772	38.166728000364	0
80.7847475460171	80.593458357431	79.9747105759708	78.8357400932612	76.9805379588966	74.0122233639203	69.0633080303904	59.8758606678534	38.0451252422991	0
80.7548430139372	80.5632284385098	79.9434247073365	78.8024891647998	76.9440328420562	73.9703848442172	69.0122340695948	59.8063870252505	37.9233749883723	0
80.7249344427674	80.5329942584495	79.9121339573329	78.7692322063577	76.9075197041622	73.9285346868956	68.9611409277946	59.736873467841	37.8014767570397	0
80.6950218245767	80.5027558091835	79.8808383174225	78.7359692084402	76.8709985337699	73.8866728760686	68.9100285770262	59.6673199213992	37.6794300646253	0
80.6651051514319	80.4725130826441	79.8495377790675	78.7027001615518	76.8344693194286	73.8447993958314	68.8588969892753	59.5977263115015	37.5572344253119	0
80.6351844153975	80.4422660707627	79.8182323337303	78.6694250561962	76.7979320496822	73.8029142302612	68.8077461364764	59.5280925635251	37.4348893511315	0
80.6052596085364	80.4120147654695	79.786921972873	78.6361438828763	76.7613867130689	73.7610173634175	68.7565759905127	59.4584186026478	37.3123943519567	0
80.5753307229091	80.3817591586941	79.7556066879578	78.6028566320937	76.7248332981208	73.7191087793413	68.7053865232164	59.3887043538473	37.1897489354913	0
80.5453977505743	80.3514992423649	79.7242864704469	78.5695632943492	76.6882717933643	73.6771884620554	68.6541777063679	59.3189497419007	37.0669526072611	0
80.5154606835889	80.3212350084094	79.6929613118023	78.5362638601424	76.6517021873196	73.6352563955645	68.6029495116963	59.2491546913835	36.9440048706052	0
80.4855195140078	80.2909664487543	79.6616312034857	78.5029583199716	76.6151244685011	73.5933125638546	68.5517019108786	59.1793191266696	36.8209052266662	0
80.4555742338844	80.2606935553256	79.6302961369589	78.4696466643339	76.5785386254166	73.5513569508934	68.5004348755404	59.1094429719302	36.6976531743818	0
80.4256248352699	80.2304163200481	79.5989561036834	78.4363288837252	76.5419446465679	73.5093895406299	68.4491483772548	59.0395261511335	36.574248210475	0
80.3956713102142	80.2001347348461	79.5676110951205	78.4030049686397	76.5053425204503	73.4674103169942	68.3978423875433	58.9695685880439	36.4506898294456	0
80.3657136507653	80.1698487916427	79.5362611027312	78.3696749095705	76.4687322355526	73.4254192638979	68.3465168778747	58.8995702062217	36.3269775235605	0
80.3357518489697	80.1395584823606	79.5049061179764	78.3363386970088	76.4321137803572	73.3834163652335	68.2951718196656	58.8295309290219	36.2031107828452	0
80.3057858968722	80.1092637989215	79.4735461323165	78.3029963214445	76.3954871433396	73.3414016048746	68.2438071842801	58.7594506795942	36.0790890950741	0
80.275815786516	80.0789647332463	79.4421811372119	78.2696477733657	76.3588523129688	73.2993749666756	68.1924229430297	58.6893293808821	35.9549119457619	0
80.245841509943	80.0486612772552	79.4108111241223	78.2362930432589	76.3222092777069	73.2573364344718	68.1410190671731	58.6191669556221	35.8305788181543	0
80.2158630591936	80.0183534228677	79.3794360845073	78.2029321216086	76.2855580260092	73.2152859920794	68.0895955279158	58.5489633263437	35.706089193219	0
80.1858804263064	79.9880411620025	79.348056009826	78.1695649988978	76.2488985463238	73.1732236232949	68.0381522964108	58.4787184153681	35.5814425496367	0
80.1558936033191	79.9577244865776	79.316670891537	78.1361916656072	76.212230827092	73.1311493118958	67.9866893437575	58.4084321448077	35.4566383637917	0
80.1259025822676	79.9274033885102	79.2852807210988	78.1028121122159	76.1755548567478	73.0890630416396	67.9352066410022	58.3381044365659	35.3316761097636	0
80.0959073551867	79.8970778597169	79.2538854899689	78.0694263292006	76.138870623718	73.0469647962646	67.8837041591377	58.2677352123361	35.2065552593175	0
80.0659079141098	79.8667478921135	79.2224851896048	78.0360343070363	76.1021781164222	73.0048545594893	67.8321818691034	58.1973243936011	35.0812752818957	0
80.035904251069	79.8364134776153	79.1910798114632	78.0026360361955	76.0654773232726	72.9627323150122	67.7806397417848	58.1268719016326	34.9558356446083	0
80.0058963580952	79.8060746081365	79.1596693470004	77.9692315071488	76.0287682326737	72.9205980465123	67.7290777480138	58.0563776574903	34.8302358122243	0
79.9758842272181	79.7757312755911	79.1282537876718	77.9358207103644	75.992050833023	72.8784517376484	67.6774958585682	57.9858415820217	34.7044752471631	0
79.945867850466	79.7453834718922	79.0968331249327	77.902403636308	75.9553251127098	72.8362933720595	67.625894044172	57.9152635958611	34.578553409485	0
79.9158472198663	79.7150311889521	79.0654073502372	77.8689802754432	75.9185910601162	72.7941229333642	67.5742722754947	57.8446436194289	34.4524697568826	0
79.885822327445	79.6846744186827	79.0339764550393	77.835550618231	75.8818486636162	72.7519404051613	67.5226305231518	57.7739815729313	34.3262237446723	0
79.8557931652272	79.654313152995	79.0025404307919	77.8021146551299	75.8450979115763	72.709745771029	67.4709687577041	57.7032773763595	34.1998148257849	0
79.8257597252366	79.6239473837996	78.9710992689473	77.7686723765959	75.8083387923547	72.6675390145254	67.419286949658	57.6325309494889	34.0732424507571	0
79.7957219994962	79.5935771030061	78.939652960957	77.7352237730824	75.771571294302	72.625320119188	67.3675850694652	57.5617422118787	33.9465060677229	0
79.7656799800276	79.5632023025238	78.9082014982719	77.70176883504	75.7347954057607	72.5830890685341	67.3158630875226	57.4909110828709	33.8196051224045	0
79.7356336588515	79.5328229742611	78.8767448723419	77.6683075529167	75.6980111150649	72.5408458460601	67.2641209741721	57.42003748159	33.692539058104	0
79.7055830279876	79.5024391101258	78.8452830746162	77.6348399171577	75.6612184105409	72.498590435242	67.2123586997005	57.3491213269422	33.5653073156945	0
79.6755280794547	79.4720507020251	78.8138160965429	77.6013659182054	75.6244172805065	72.456322819535	67.1605762343396	57.2781625376148	33.4379093336116	0
79.6454688052702	79.4416577418655	78.7823439295695	77.567885546499	75.5876077132712	72.4140429823735	67.1087735482658	57.2071610320753	33.3103445478448	0
79.6154051974511	79.4112602215528	78.7508665651424	77.5343987924752	75.5507896971363	72.371750907171	67.0569506116	57.1361167285711	33.1826123919288	0
79.5853372480129	79.3808581329923	78.7193839947071	77.5009056465674	75.5139632203944	72.3294465773203	67.0051073944076	57.0650295451285	33.0547122969354	0
79.5552649489707	79.3504514680885	78.6878962097082	77.4674060992061	75.4771282713298	72.2871299761929	66.9532438666984	56.9938993995523	32.9266436914647	0
79.5251882923383	79.3200402187452	78.656403201589	77.4339001408186	75.440284838218	72.2448010871393	66.9013599984264	56.9227262094249	32.7984060016367	0
79.4951072701286	79.2896243768657	78.6249049617921	77.400387761829	75.403432909326	72.202459893489	66.8494557594895	56.8515098921057	32.6699986510832	0
79.4650218743538	79.2592039343525	78.5934014817588	77.3668689526582	75.3665724729121	72.1601063785503	66.7975311197297	56.7802503647307	32.5414210609391	0
79.4349320970252	79.2287788831074	78.5618927529294	77.3333437037239	75.3297035172258	72.1177405256099	66.7455860489329	56.7089475442113	32.4126726498346	0
79.404837930153	79.1983492150316	78.530378766743	77.2998120054406	75.2928260305075	72.0753623179334	66.6936205168285	56.6376013472341	32.2837528338865	0
79.3747393657468	79.1679149220256	78.4988595146376	77.2662738482191	75.2559400009892	72.032971738765	66.6416344930897	56.5662116902599	32.1546610266903	0
79.3446363958153	79.1374759959893	78.4673349880501	77.232729222467	75.2190454168936	71.9905687713273	66.589627947333	56.4947784895231	32.0253966393122	0
79.3145290123661	79.1070324288216	78.4358051784159	77.1991781185883	75.1821422664343	71.9481533988214	66.5376008491184	56.4233016610312	31.8959590802807	0
79.2844172074064	79.0765842124211	78.4042700771694	77.1656205269837	75.145230537816	71.9057256044267	66.4855531679491	56.351781120564	31.7663477555787	0
79.2543009729423	79.0461313386854	78.3727296757436	77.1320564380501	75.1083102192342	71.8632853713012	66.4334848732712	56.2802167836725	31.6365620686358	0
79.224180300979	79.0156737995115	78.3411839655702	77.0984858421809	75.0713812988753	71.8208326825806	66.3813959344741	56.2086085656791	31.5066014203199	0
79.1940551835212	78.9852115867956	78.3096329380797	77.0649087297656	75.0344437649162	71.7783675213794	66.3292863208898	56.1369563816759	31.3764652089301	0
79.1639256125726	78.9547446924332	78.2780765847009	77.0313250911904	74.9974976055247	71.7358898707897	66.2771560017932	56.0652601465249	31.2461528301879	0
79.1337915801361	78.9242731083192	78.2465148968616	76.9977349168373	74.9605428088589	71.693399713882	66.2250049464018	55.9935197748567	31.1156636772306	0
79.1036530782139	78.8937968263475	78.2149478659879	76.9641381970847	74.923579363068	71.6508970337047	66.1728331238756	55.9217351810699	30.9849971406026	0
79.0735100988073	78.8633158384114	78.1833754835044	76.930534922307	74.8866072562911	71.608381813284	66.1206405033169	55.8499062793307	30.8541526082486	0
79.0433626339168	78.8328301364033	78.1517977408344	76.896925082875	74.8496264766582	71.5658540356241	66.0684270537704	55.7780329835717	30.7231294655056	0
79.0132106755424	78.8023397122151	78.1202146293996	76.8633086691551	74.8126370122895	71.5233136837071	66.0161927442228	55.7061152074919	30.5919270950956	0
78.983054215683	78.7718445577375	78.0886261406201	76.8296856715099	74.7756388512955	71.4807607404925	65.9639375436031	55.6341528645552	30.460544877118	0
78.9528932463368	78.7413446648608	78.0570322659145	76.796056080298	74.7386319817771	71.4381951889179	65.9116614207818	55.5621458679903	30.3289821890425	0
78.9227277595013	78.7108400254742	78.0254329966997	76.7624198858738	74.7016163918254	71.3956170118983	65.8593643445715	55.4900941307895	30.1972384057018	0
78.8925577471732	78.6803306314661	77.9938283243909	76.7287770785876	74.6645920695216	71.3530261923262	65.8070462837264	55.4179975657084	30.065312899284	0
78.8623832013485	78.6498164747243	77.9622182404018	76.6951276487855	74.6275590029371	71.3104227130718	65.7547072069423	55.3458560852651	29.9332050393258	0
78.8322041140222	78.6192975471354	77.9306027361444	76.6614715868092	74.5905171801333	71.2678065569827	65.7023470828563	55.2736696017392	29.8009141927054	0
78.8020204771887	78.5887738405855	77.8989818030286	76.6278088829963	74.5534665891617	71.2251777068838	65.6499658800469	55.2014380271715	29.6684397236353	0
78.7718322828417	78.5582453469595	77.8673554324631	76.5941395276802	74.5164072180638	71.1825361455773	65.5975635670338	55.1291612733628	29.5357809936553	0
78.741639522974	78.5277120581416	77.8357236158543	76.5604635111895	74.4793390548708	71.1398818558429	65.5451401122779	55.0568392518737	29.4029373616258	0
78.7114421895776	78.4971739660151	77.8040863446071	76.5267808238486	74.442262087604	71.0972148204373	65.4926954841809	54.9844718740234	29.2699081837207	0
78.6812402746437	78.4666310624623	77.7724436101243	76.4930914559777	74.4051763042745	71.0545350220945	65.4402296510854	54.9120590508893	29.136692813421	0
78.6510337701629	78.4360833393646	77.740795403807	76.459395397892	74.3680816928831	71.0118424435256	65.3877425812748	54.8396006933061	29.0032906015076	0
78.6208226681248	78.4055307886025	77.7091417170543	76.4256926399025	74.3309782414201	70.9691370674187	65.3352342429731	54.7670967118652	28.8697008960549	0
78.5906069605182	78.3749734020554	77.6774825412634	76.3919831723154	74.293865937866	70.9264188764389	65.2827046043447	54.6945470169138	28.7359230424242	0
78.5603866393314	78.3444111716019	77.6458178678294	76.3582669854325	74.2567447701904	70.8836878532283	65.2301536334947	54.6219515185542	28.6019563832569	0
78.5301616965516	78.3138440891196	77.6141476881456	76.3245440695506	74.2196147263527	70.8409439804059	65.177581298468	54.5493101266433	28.4678002584685	0
78.4999321241653	78.2832721464849	77.582471993603	76.2908144149622	74.182475794302	70.7981872405676	65.1249875672501	54.4766227507915	28.3334540052414	0
78.469697914158	78.2526953355734	77.5507907755908	76.2570780119545	74.1453279619765	70.7554176162858	65.0723724077664	54.4038893003623	28.1989169580193	0
78.4394590585148	78.2221136482595	77.5191040254958	76.2233348508103	74.108171217304	70.71263509011	65.0197357878821	54.3311096844712	28.0641884485003	0
78.4092155492195	78.1915270764166	77.487411734703	76.1895849218076	74.071005548202	70.6698396445663	64.9670776754024	54.2582838119852	27.9292678056307	0
78.3789673782554	78.1609356119172	77.455713894595	76.1558282152191	74.0338309425768	70.6270312621572	64.9143980380722	54.1854115915222	27.7941543555987	0
78.3487145376048	78.1303392466324	77.4240104965522	76.1220647213129	73.9966473883243	70.5842099253622	64.8616968435759	54.1124929314499	27.6588474218282	0
78.3184570192492	78.0997379724325	77.3923015319531	76.0882944303521	73.9594548733298	70.5413756166369	64.8089740595374	54.0395277398851	27.5233463249726	0
78.2881948151692	78.0691317811863	77.3605869921735	76.0545173325947	73.9222533854675	70.4985283184138	64.75622965352	53.9665159246933	27.3876503829086	0
78.2579279173446	78.038520664762	77.3288668685873	76.0207334182938	73.8850429126009	70.4556680131015	64.7034635930263	53.8934573934875	27.2517589107298	0
78.2276563177542	78.0079046150261	77.2971411525658	75.9869426776971	73.8478234425827	70.4127946830851	64.650675845498	53.8203520536277	27.1156712207407	0
78.1973800083761	77.9772836238443	77.2654098354781	75.9531451010476	73.8105949632546	70.3699083107262	64.5978663783159	53.7471998122201	26.9793866224506	0
78.1670989811873	77.9466576830809	77.2336729086909	75.9193406785828	73.7733574624474	70.3270088783626	64.5450351587995	53.6740005761164	26.8429044225672	0
78.136813228164	77.9160267845992	77.2019303635687	75.8855294005352	73.7361109279807	70.2840963683082	64.4921821542075	53.600754251913	26.7062239249905	0
78.1065227412815	77.8853909202609	77.1701821914732	75.8517112571319	73.6988553476634	70.2411707628533	64.4393073317369	53.5274607459499	26.5693444308066	0
78.0762275125142	77.8547500819269	77.138428383764	75.8178862385948	73.661590709293	70.1982320442643	64.3864106585237	53.4541199643107	26.4322652382816	0
78.0459275338354	77.8241042614566	77.1066689317979	75.7840543351405	73.6243170006562	70.1552801947838	64.3334921016419	53.3807318128211	26.2949856428547	0
78.0156227972175	77.793453450708	77.0749038269294	75.7502155369802	73.5870342095282	70.1123151966302	64.2805516281044	53.3072961970484	26.1575049371328	0
77.9853132946322	77.7627976415381	77.0431330605103	75.7163698343197	73.5497423236732	70.0693370319982	64.227589204862	53.2338130223009	26.0198224108832	0
77.9549990180499	77.7321368258024	77.0113566238901	75.6825172173595	73.5124413308441	70.0263456830584	64.1746047988038	53.160282193627	25.8819373510277	0
77.92467995944	77.701470995355	76.9795745084153	75.6486576762945	73.4751312187826	69.9833411319573	64.1215983767569	53.0867036158143	25.7438490416355	0
77.8943561107712	77.6708001420487	76.9477867054301	75.6147912013142	73.437811975219	69.9403233608172	64.0685699054864	53.0130771933889	25.6055567639171	0
77.864027464011	77.640124257735	76.9159932062758	75.5809177826023	73.4004835878723	69.8972923517366	64.0155193516952	52.9394028306148	25.4670597962169	0
77.8336940111258	77.6094433342639	76.8841940022912	75.5470374103373	73.36314604445	69.8542480867894	63.962446682024	52.865680431493	25.3283574140066	0
77.803355744081	77.578757363484	76.8523890848123	75.513150074692	73.3257993326483	69.8111905480255	63.909351863051	52.7919098997606	25.189448889878	0
77.7730126548411	77.5480663372424	76.8205784451723	75.4792557658332	73.2884434401519	69.7681197174705	63.856234861292	52.7180911388902	25.0503334935354	0
77.7426647353694	77.517370247385	76.7887620747017	75.4453544739225	73.251078354634	69.7250355771256	63.8030956432003	52.6442240520891	24.9110104917886	0
77.7123119776281	77.4866690857559	76.7569399647282	75.4114461891156	73.2137040637562	69.6819381089678	63.7499341751662	52.5703085422984	24.7714791485446	0
77.6819543735783	77.4559628441978	76.7251121065765	75.3775309015624	73.1763205551686	69.6388272949495	63.6967504235176	52.4963445121923	24.6317387248	0
77.6515919151802	77.4252515145519	76.6932784915686	75.343608601407	73.1389278165097	69.5957031169989	63.6435443545192	52.4223318641775	24.4917884786326	0
77.6212245943924	77.394535088658	76.6614391110236	75.3096792787878	73.1015258354064	69.5525655570195	63.5903159343729	52.3482705003919	24.3516276651927	0
77.590852403173	77.363813558354	76.6295939562576	75.2757429238373	73.0641145994738	69.5094145968905	63.5370651292174	52.2741603227045	24.2112555366942	0
77.5604753334783	77.3330869154766	76.5977430185838	75.2417995266821	73.0266940963154	69.4662502184665	63.4837919051282	52.2000012327141	24.0706713424055	0
77.5300933772639	77.3023551518605	76.5658862893125	75.2078490774429	72.9892643135228	69.4230724035774	63.4304962281175	52.1257931317485	23.9298743286393	0
77.4997065264839	77.2716182593391	76.5340237597508	75.1738915662345	72.9518252386761	69.3798811340286	63.377178064134	52.0515359208642	23.7888637387429	0
77.4693147730915	77.240876229744	76.5021554212028	75.1399269831656	72.9143768593434	69.3366763916008	63.3238373790631	51.9772295008452	23.6476388130876	0
77.4389181090383	77.2101290549052	76.4702812649698	75.1059553183391	72.876919163081	69.2934581580501	63.2704741387264	51.9028737722021	23.5061987890569	0
77.4085165262749	77.1793767266509	76.4384012823497	75.0719765618516	72.8394521374333	69.2502264151077	63.2170883088819	51.8284686351717	23.3645429010353	0
77.3781100167508	77.1486192368077	76.4065154646375	75.0379907037938	72.8019757699329	69.2069811444801	63.1636798552238	51.7540139897161	23.2226703803958	0
77.3476985724138	77.1178565772004	76.3746238031248	75.0039977342503	72.7644900481004	69.1637223278492	63.1102487433822	51.6795097355215	23.0805804554868	0
77.3172821852107	77.0870887396521	76.3427262891002	74.9699976432994	72.7269949594444	69.1204499468719	63.0567949389233	51.6049557719981	22.938272351618	0
77.2868608470869	77.056315715984	76.3108229138493	74.9359904210134	72.6894904914616	69.0771639831802	63.0033184073494	51.5303519982787	22.7957452910463	0
77.2564345499867	77.0255374980157	76.2789136686539	74.9019760574583	72.6519766316366	69.0338644183813	62.9498191140984	51.4556983132183	22.6529984929601	0
77.2260032858526	76.9947540775647	76.2469985447932	74.8679545426941	72.6144533674421	68.9905512340574	62.896297024544	51.3809946153928	22.5100311734629	0
77.1955670466261	76.963965446447	76.2150775335426	74.8339258667741	72.5769206863386	68.947224411766	62.8427521039953	51.306240803099	22.3668425455558	0
77.1651258242472	76.9331715964766	76.1831506261746	74.7998900197457	72.5393785757744	68.9038839330392	62.7891843176971	51.231436774353	22.2234318191193	0
77.1346796106546	76.9023725194653	76.151217813958	74.7658469916498	72.5018270231859	68.8605297793844	62.7355936308296	51.1565824268899	22.0797982008935	0
77.1042283977854	76.8715682072235	76.1192790881584	74.7317967725211	72.4642660159971	68.8171619322839	62.6819800085084	51.0816776581627	21.9359408944575	0
77.0737721775754	76.8407586515594	76.0873344400381	74.6977393523878	72.4266955416201	68.7737803731948	62.6283434157843	51.0067223653418	21.7918591002066	0
77.0433109419589	76.8099438442793	76.0553838608558	74.6636747212717	72.3891155874546	68.7303850835493	62.574683817643	50.9317164453139	21.6475520153292	0
77.0128446828688	76.7791237771874	76.0234273418669	74.6296028691883	72.3515261408879	68.6869760447544	62.5210011790057	50.8566597946815	21.5030188337814	0
76.9823733922364	76.748298442086	75.9914648743234	74.5955237861464	72.3139271892955	68.6435532381918	62.4672954647281	50.7815523097616	21.3582587462602	0
76.9518970619915	76.7174678307755	75.9594964494734	74.5614374621485	72.2763187200401	68.6001166452181	62.4135666396011	50.7063938865856	21.2132709401745	0
76.9214156840625	76.6866319350542	75.927522058562	74.5273438871906	72.2387007204725	68.5566662471649	62.3598146683503	50.6311844208979	21.0680545996152	0
76.890929250376	76.6557907467181	75.8955416928303	74.4932430512621	72.2010731779308	68.5132020253383	62.306039515636	50.5559238081553	20.9226089053217	0
76.8604377528574	76.6249442575613	75.8635553435163	74.4591349443457	72.1634360797411	68.4697239610193	62.252241146053	50.4806119435263	20.7769330346479	0
76.8299411834301	76.594092459376	75.8315630018539	74.4250195564178	72.1257894132168	68.4262320354634	62.1984195241307	50.4052487218901	20.6310261615244	0
76.7994395340163	76.5632353439518	75.7995646590737	74.390896877448	72.0881331656591	68.3827262299012	62.1445746143331	50.3298340378361	20.484887456419	0
76.7689327965361	76.5323729030766	75.7675603064025	74.3567668973992	72.0504673243567	68.3392065255376	62.0907063810584	50.2543677856625	20.3385160862943	0
76.7384209629084	76.5015051285359	75.7355499350635	74.3226296062276	72.0127918765858	68.2956729035522	62.0368147886389	50.1788498593763	20.1919112145623	0
76.7079040250503	76.4706320121129	75.7035335362762	74.288484993883	71.9751068096101	68.2521253450995	61.9828998013414	50.1032801526918	20.0450720010358	0
76.677381974877	76.4397535455888	75.6715111012564	74.2543330503082	71.9374121106811	68.2085638313083	61.9289613833667	50.0276585590301	19.8979976018769	0
76.6468548043023	76.4088697207425	75.639482621216	74.2201737654392	71.8997077670373	68.1649883432821	61.8749994988495	49.9519849715184	19.7506871695414	0
76.616322505238	76.3779805293505	75.6074480873632	74.1860071292056	71.861993765905	68.1213988620991	61.8210141118586	49.8762592829888	19.6031398527198	0
76.5857850695943	76.3470859631872	75.5754074909024	74.1518331315297	71.8242700944979	68.0777953688118	61.7670051863967	49.800481385978	19.4553547962738	0
76.5552424892796	76.3161860140245	75.5433608230343	74.1176517623274	71.7865367400171	68.0341778444474	61.7129726864	49.724651172726	19.307331141169	0
76.5246947562006	76.2852806736322	75.5113080749556	74.0834630115075	71.748793689651	67.9905462700076	61.6589165757387	49.6487685351757	19.1590680244024	0
76.494141862262	76.2543699337775	75.4792492378591	74.0492668689721	71.7110409305755	67.9469006264686	61.6048368182166	49.5728333649718	19.0105645789252	0
76.4635837993669	76.2234537862253	75.4471843029337	74.0150633246162	71.6732784499539	67.903240894781	61.5507333775709	49.4968455534602	18.8618199335601	0
76.4330205594163	76.1925322227383	75.4151132613646	73.9808523683282	71.6355062349367	67.85956705587	61.4966062174725	49.420804991687	18.7128332129129	0
76.4024521343096	76.1616052350765	75.3830361043327	73.9466339899891	71.5977242726618	67.8158790906351	61.4424553015254	49.3447115703978	18.5636035372781	0
76.3718785159439	76.1306728149975	75.3509528230152	73.9124081794735	71.5599325502545	67.7721769799503	61.3882805932673	49.268565180037	18.4141300225378	0
76.342106857926	76.1005518600977	75.3197111865876	73.879079860545	71.523130676736	67.7296167120695	61.3355146483245	49.1943790333232	18.2683891097372	0
76.3132192371107	76.0713254532888	75.2893974710205	73.846741234717	71.4874207082579	67.6883167228214	61.2843051986205	49.1223638230856	18.1268194124072	0
76.2851932093122	76.0429708866478	75.2599881343714	73.815367221589	71.4527750320027	67.6482452629788	61.2346133279695	49.0524662534452	17.9893252082957	0
76.2580068598954	76.0154659877168	75.2314601888283	73.7849333290988	71.419166679159	67.6093713164824	61.1864010025244	48.9846341875896	17.8558124472758	0
76.2315498087097	75.9886990492513	75.2036977237726	73.7553158689036	71.3864590887854	67.5715370976548	61.1394730140881	48.918594368483	17.7257489205846	0
76.2058925406598	75.9627414133835	75.1767747987282	73.7265939363964	71.3547397133844	67.5348439022936	61.0939552744523	48.8545249869109	17.599494687371	0
76.1810146034418	75.9375723864025	75.1506699564335	73.6987446650669	71.3239833644752	67.4992627431428	61.0498121962163	48.7923771288519	17.4769604568217	0
76.156896032091	75.9131717674392	75.1253622498397	73.6717457304971	71.2941654476829	67.4647653107779	61.0070090111715	48.7321029640152	17.3580585838174	0
76.1335173385222	75.8895198379025	75.1008312312184	73.6455753388789	71.2652619503246	67.4313239597892	60.9655117543643	48.6736557266595	17.2427030591789	0
76.110781461092	75.8665183672626	75.0769749674343	73.6201247045414	71.2371527413637	67.3987998416968	60.925148542374	48.6167944784812	17.130422464415	0
76.0887499885593	75.8442296931952	75.0538581702821	73.5954629389832	71.209914233669	67.3672814642091	60.886029391907	48.5616749112594	17.021530917769	0
76.0674047488711	75.8226354281033	75.0314617702651	73.5715697134004	71.1835240213777	67.3367430177419	60.8481225621672	48.5082532151779	16.9159470411215	0
76.0467280080751	75.8017176274964	75.0097671568012	73.5484251869614	71.1579602341505	67.3071593051839	60.8113970556849	48.4564865723953	16.8135910460181	0
76.0267024607329	75.7814587803052	74.9887561682267	73.5260099962482	71.1332015257186	67.278505729067	60.7758226032983	48.4063331386536	16.7143847194118	0
76.0072428458426	75.7617725973139	74.9683392580604	73.5042285653989	71.1091423347655	67.2506602463826	60.7412480476808	48.3575807712727	16.6179114164177	0
75.98840292848	75.7427134972555	74.9485729172182	73.4831412254668	71.0858493651153	67.2237001179535	60.7077694241784	48.3103653595891	16.5244448484646	0
75.9701665850673	75.7242651645045	74.9294402223835	73.4627299303099	71.0633027171348	67.1976024027957	60.6753584779909	48.2646477591686	16.4339112409931	0
75.9525180850586	75.706411681004	74.9109246621403	73.4429770720686	71.0414829727589	67.1723447118221	60.6439876264191	48.2203897298413	16.3462383334106	0
75.9354420821865	75.6891375174192	74.8930101278351	73.4238654714987	71.0203711849746	67.1479051959934	60.6136299448504	48.1775539182157	16.2613553615817	0
75.9188637583931	75.6723669523468	74.8756180361684	73.4053112470026	70.9998746954101	67.1241767046399	60.5841526626487	48.1359537900176	16.1788948533578	0
75.902830004849	75.6561474469226	74.8587976551681	73.3873670151032	70.9800516775297	67.1012266170572	60.5556395294564	48.0957078284003	16.0990950482659	0
75.8873265345679	75.6404645433817	74.8425339865807	73.3700167784863	70.9608844837676	67.0790345749234	60.5280654390434	48.0567811360838	16.0218893811345	0
75.8723394124929	75.6253041399863	74.8268124011297	73.353244932684	70.942355898654	67.0575807159657	60.5014058910074	48.0191396369126	15.9472127113605	0
75.8578012216283	75.6105980050974	74.8115620861711	73.3369758863213	70.9243824135016	67.0367684549279	60.4755411698761	47.9826150145	15.8747327925865	0
75.8437540233804	75.596388711288	74.7968272347803	73.3212568355593	70.907016208274	67.0166582282495	60.4505463923524	47.9473135194597	15.8046629708455	0
75.8301848523869	75.5826631378373	74.7825942344864	73.3060732587268	70.8902412588879	66.9972315421225	60.4263987308345	47.9132033477878	15.7369420915675	0
75.8170810652253	75.5694084897357	74.7688498104525	73.2914109937814	70.8740419371065	66.9784703576978	60.4030759144711	47.8802534540771	15.6715103475342	0
75.8044303330394	75.5566122902299	74.7555810177645	73.2772562301318	70.858403001605	66.9603570809367	60.3805562170046	47.8484335358701	15.6083092582935	0
75.7921736035537	75.5442147728686	74.7427258271539	73.2635427485094	70.8432512901521	66.9428070790863	60.3587347033246	47.8175959401862	15.5470467793052	0
75.7803474984352	75.5322530042728	74.7303227158473	73.2503116402745	70.8286322325429	66.9258729692225	60.337676766787	47.7878331406464	15.4879082700211	0
75.7689405551631	75.520715384213	74.7183596476698	73.2375500630411	70.8145316536648	66.9095383836215	60.3173621836881	47.7591168884786	15.4308389511438	0
75.7579415985931	75.5095906032249	74.7068248879296	73.2252454956976	70.8009357323151	66.8937873618185	60.2977712298012	47.73141961947	15.3757852893675	0
75.7473397342824	75.4988676358601	74.6957069964333	73.2133857309917	70.7878309930827	66.8786043413536	60.2788846692321	47.7047144394114	15.3226949762904	0
75.7370832883418	75.4884941828534	74.6849516923681	73.201912818682	70.7751534046786	66.8639152419433	60.2606106252434	47.6788719830238	15.27131174375	0
75.7272041157853	75.4785024861681	74.6745924444209	73.190862500864	70.7629424822832	66.8497658292067	60.2430059711566	47.6539726532048	15.2217964805411	0
75.7176920949007	75.4688823022301	74.664618623196	73.1802234345202	70.7511857028907	66.8361416373093	60.2260528174638	47.6299914060316	15.1741002864918	0
75.7085373600924	75.4596236466202	74.6550198680627	73.1699845631595	70.7398708593384	66.8230285642391	60.2097337217171	47.6069038134296	15.1281754048259	0
75.6997302958541	75.4507167879778	74.6457860808447	73.160135110111	70.7289860529516	66.8104128634002	60.194031678359	47.5846860497191	15.0839752012078	0
75.6912257294704	75.442116006591	74.6368698085703	73.1506244126135	70.7184753011985	66.7982297593829	60.1788663322049	47.563224909273	15.0412751618602	0
75.6830513430893	75.4338493207937	74.6283001353718	73.1414835300328	70.7083729417588	66.7865190202368	60.1642870984049	47.5425902305467	15.0002148034932	0
75.6751982093829	75.4259076955918	74.6200676853448	73.1327024558664	70.6986679252135	66.775267878113	60.1502781751911	47.5227598500051	14.9607506080741	0
75.6676576289378	75.4182823266226	74.6121633218147	73.124271438741	70.6893494835335	66.7644638895717	60.1368241600901	47.5037121565859	14.9228400999077	0
75.6603890198222	75.4109321403793	74.6045444135925	73.1161449627672	70.6803673196034	66.7540488535053	60.1238528421702	47.4853453804335	14.8862813088214	0
75.6534171415164	75.4038821969863	74.5972369739248	73.1083508076566	70.6717521450031	66.7440583375325	60.1114084133024	47.4677219626022	14.8511988137452	0
75.6467339215561	75.3971243265181	74.5902325242702	73.1008799239979	70.6634939660634	66.7344807911897	60.0994765706752	47.4508218154228	14.8175530284709	0
75.6403314949943	75.3906505690497	74.5835228039461	73.0937234947751	70.6555830455265	66.7253049597918	60.0880433759576	47.4346253570797	14.7853053312752	0
75.6342021994123	75.3844531696099	74.5770997648996	73.0868729298037	70.6480098964285	66.7165198774134	60.0770952467512	47.4191135000929	14.7544180452781	0
75.6283106210871	75.3784962853693	74.5709262045332	73.0802885082812	70.6407306239763	66.7080747478292	60.0665691491844	47.4041973739668	14.7247146966185	0
75.6226782386316	75.3728016557023	74.5650246889071	73.073994328467	70.6337718695011	66.7000004237901	60.0565034124974	47.3899311190723	14.6963031346984	0
75.6172979465396	75.3673620892313	74.5593877547053	73.0679824240332	70.6271248345315	66.6922867338421	60.046885434001	47.3762970100288	14.6691482975308	0
75.6121628235074	75.3621705809936	74.5540081320317	73.0622450350326	70.6207809483937	66.6849237694606	60.0377029354272	47.3632777732162	14.6432159939401	0
75.6072661279562	75.357220307913	74.5488787397159	73.0567746029007	70.6147318627094	66.6779018787277	60.0289439552052	47.3508565762838	14.6184728850259	0
75.6025769863697	75.3524800223081	74.5439671443834	73.0515364984405	70.6089393084965	66.6711767734517	60.0205535281964	47.3389559010248	14.594764986685	0
75.598114012895	75.347968564285	74.539292902486	73.0465516058557	70.6034263736736	66.6647751902635	60.0125648658952	47.3276226438421	14.5721855779498	0
75.5938709599892	75.343679610753	74.5348494516684	73.0418129202402	70.5981853210942	66.6586881829425	60.0049668780078	47.3168411874604	14.5507036752864	0
75.5898417434014	75.339607003882	74.5306304010682	73.0373136197132	70.5932086156933	66.6529070386306	59.9977487625024	47.3065963171602	14.5302890779642	0
75.5860204381616	75.3357447470454	74.5266295271091	73.0330470609373	70.5884889195495	66.6474232721517	59.990899998651	47.2968732112597	14.510912350768	0
75.5823801551338	75.3320656252065	74.5228185819812	73.0289830835005	70.5839929018059	66.64219830872	59.9843727071913	47.2876043289639	14.4924393099287	0
75.5789370099822	75.3285859496492	74.5192144971186	73.0251397683362	70.5797405511884	66.6372552950629	59.9781956365433	47.2788302512967	14.4749505564606	0
75.5756855154303	75.3253001667299	74.5158115086665	73.0215109628019	70.5757250716438	66.6325863718951	59.9723590395218	47.2705372381876	14.4584187681594	0
75.5726203287734	75.3222028691258	74.5126040046259	73.0180906763519	70.5719398461377	66.6281838867459	59.9668534246562	47.2627119075384	14.4428173238352	0
75.5697362482921	75.3192887922062	74.5095865210905	73.0148730765265	70.5683784322316	66.6240403888655	59.961669549938	47.2553412266194	14.4281202873409	0
75.5670098778634	75.3165342562968	74.5067344797893	73.0118319209618	70.5650118289439	66.6201223137616	59.9567657516693	47.2483664123694	14.4142108770011	0
75.5644551560243	75.3139533691334	74.504062524827	73.0089828479976	70.5618573246055	66.6164496802724	59.9521668899877	47.2418225455387	14.401158672582	0
75.5620672683502	75.3115412580756	74.5015655991414	73.0063204594995	70.5589089564997	66.6130155919577	59.9478644085678	47.2356975543006	14.3889396268217	0
75.5598415282573	75.3092931798749	74.49923877997	73.0038395007117	70.5561609202855	66.6098133354055	59.9438499775757	47.2299796845459	14.3775303181349	0
75.5577569957084	75.3071879407413	74.4970600693332	73.0015164844089	70.5535872598731	66.6068128698202	59.9400863055499	47.224616316696	14.3668262224867	0
75.5558260906176	75.3052381113691	74.4950425158799	72.9993653452084	70.5512033800763	66.6040320323873	59.9365955408592	47.2196386965544	14.3568892472149	0
75.5540444774925	75.3034393038674	74.4931815656974	72.9973812221599	70.549003911577	66.6014646124776	59.933369975996	47.2150359434769	14.3476976946085	0
75.5524079366749	75.3017872475883	74.4914727865703	72.9955593842493	70.5469836286016	66.5991045653871	59.930402108897	47.2107974654231	14.3392304373489	0
75.5509123614185	75.3002777861694	74.4899118649132	72.9938952271265	70.5451374453091	66.5969460081704	59.9276846378129	47.206912951836	14.3314669049144	0
75.5495395638683	75.2988925114135	74.4884796941828	72.9923683510225	70.5434428179008	66.5949628491861	59.9251851722708	47.2033366948287	14.3243163262805	0
75.5483002664946	75.2976422759956	74.4871875397455	72.9909907862931	70.5419130459999	66.5931704872869	59.9229228301849	47.2000956559712	14.3178320508968	0
75.5471906725513	75.2965232373304	74.4860314137312	72.9897582763766	70.540543428002	66.5915634837252	59.9208908599888	47.1971802981837	14.3119950410495	0
75.5462070875051	75.2955316562912	74.4850074356668	72.9886666793896	70.5393293890046	66.5901365462439	59.9190826916108	47.194581339733	14.3067867655453	0
75.5453459164336	75.2946638945774	74.4841118297453	72.987711965212	70.5382664775885	66.5888845253616	59.9174919318923	47.1922897478493	14.3021891873852	0
75.5445913774308	75.2939039791647	74.4833280171684	72.9868764332474	70.5373351331986	66.5877847822485	59.9160904760296	47.1902658607447	14.2981235707883	0
75.5439527179538	75.2932612698479	74.4826657137377	72.9861704591922	70.5365468262281	66.5868505971258	59.9148948091547	47.1885329192129	14.2946358449051	0
75.5434266164838	75.2927324050686	74.4821214309353	72.9855903197073	70.5358974442174	66.5860772124468	59.913899023838	47.1870825742954	14.2917093322009	0
75.5430098415933	75.2923141144599	74.4816917749117	72.9851323925466	70.5353829864066	66.5854599998339	59.9130973727692	47.1859067025932	14.2893278038576	0
75.5426992496321	75.2920032165053	74.4813734440563	72.9847931539635	70.5349995608715	66.5849944567715	59.9124842646733	47.1849974005604	14.2874754686523	0
75.5424811598545	75.291785864875	74.4811520671393	72.9845572606789	70.5347302125119	66.5846609601155	59.9120353382924	47.1843202891599	14.2860841082467	0
75.5423635392851	75.2916701234322	74.4810360148457	72.9844336520647	70.5345848238756	66.5844709510976	59.9117647937845	47.1838953810531	14.2851932239382	0
75.5423434851304	75.2916530544639	74.4810222386728	72.9844190746673	70.5345598016972	66.5844202725928	59.9116674681296	47.1837153762927	14.2847882274792	0
75.5424181739144	75.2917318005456	74.4811077734708	72.9845103640466	70.5346516510676	66.5845048812324	59.9117383393846	47.1837731738771	14.2848549272642	0
75.5425753974733	75.2918940058318	74.481279795188	72.9846938290662	70.5348452429502	66.5847072675046	59.911955670282	47.1840380983638	14.2853324787572	0
75.5428222326895	75.2921468332753	74.4815457394195	72.9849774106121	70.5351493560792	66.5850375942774	59.9123320727713	47.1845279193052	14.2862559226029	0
75.5431560736772	75.2924876457078	74.4819028696839	72.9853581884433	70.5355607653769	66.5854921302664	59.9128629119955	47.1852360817087	14.2876121570487	0
75.5435743861737	75.2929138784616	74.4823485247703	72.9858333227015	70.5360763345864	66.5860672469244	59.913543680548	47.1861562104415	14.2893884394135	0
75.5440747056731	75.2934230374811	74.4828801167767	72.9864000518165	70.5366930139577	66.5867594157667	59.9143699951641	47.1872821055866	14.2915723769348	0
75.5446464682125	75.2940044311153	74.4834865491548	72.9870465293535	70.5373977133413	66.5875534872856	59.915323048598	47.1885872277883	14.2941113583981	0
75.5452957592087	75.2946642188643	74.4841742159883	72.9877795840859	70.5381979820554	66.5884582005834	59.9164136841867	47.1900868495199	14.2970354652679	0
75.5460203054645	75.2954001003285	74.4849407304333	72.9885966691581	70.5390910076013	66.5894703016059	59.9176378591721	47.1917752515646	14.3003332657178	0
75.5468178967176	75.2962098388154	74.4857837717875	72.9894953083488	70.5400740555289	66.5905866265843	59.9189916428362	47.1936468729372	14.3039936442264	0
75.5476863839871	75.2970912596661	74.4867010837533	72.990473094215	70.5411444673858	66.5918040996636	59.9204712135662	47.195696306756	14.3080057934022	0
75.5486166351966	75.2980351205318	74.4876830742211	72.9915197868179	70.5422909286112	66.593109626583	59.9220603158872	47.1979006161598	14.3123242712639	0
75.5496138775672	75.2990467123474	74.4887352357773	72.9926412523281	70.5435199243914	66.5945107141453	59.9237682625837	47.2002729133985	14.3169748750178	0
75.5506761301387	75.3001240305385	74.4898554887117	72.9938352718818	70.5448290046421	66.5960045275349	59.9255915312084	47.2028082142152	14.3219476430252	0
75.5518014671922	75.3012651264504	74.4910418113714	72.9950996886146	70.5462157877844	66.597588311187	59.9275266976889	47.2055016733701	14.3272328917971	0
75.5529880167871	75.3024681058671	74.4922922386233	72.9964324060191	70.5476779589293	66.5992593866886	59.9295704337268	47.2083485809772	14.3328212087144	0
75.5542278925802	75.3037249873273	74.4935984872119	72.9978245817843	70.5492057482243	66.6010064477721	59.9317087038554	47.2113291344609	14.3386733869241	0
75.5555255797356	75.305040310747	74.4949652702363	72.9992812497592	70.5508047207493	66.6028359357752	59.9339494977117	47.2144545792236	14.3448115261465	0
75.5568793537224	75.3064123311322	74.4963907774905	73.0008004788787	70.552472744411	66.6047453837531	59.9362897495272	47.2177205764548	14.3512269568985	0
75.5582875384463	75.3078393525204	74.4978732496744	73.0023803924379	70.5542077471779	66.6067323942472	59.9387264798073	47.2211229093209	14.3579112538992	0
75.5597431177698	75.3093142742424	74.4994053178288	73.0040131244214	70.5560010382115	66.6087869099299	59.9412472038132	47.2246439646673	14.3648295642521	0
75.5612500627956	75.3108411159472	74.5009911550672	73.0057031320903	70.5578575451889	66.6109146340648	59.943858994718	47.2282936952291	14.3720014303315	0
75.5628068301666	75.3124183160418	74.502629141595	73.0074486877078	70.5597753606643	66.613113359601	59.9465591094513	47.232068218474	14.3794190965833	0
75.564411920122	75.3140443570655	74.504317703436	73.0092481124623	70.5617526312467	66.6153809420252	59.9493448826011	47.2359637617022	14.3870750274019	0
75.5660638753265	75.3157177645043	74.5060553112017	73.011099775153	70.5637875561457	66.6177152976804	59.9522137243284	47.2399766591025	14.3949619012549	0
75.5677566477787	75.3174324176015	74.5078356131122	73.0129968958984	70.5658726448997	66.6201077586276	59.9551548749947	47.244091733063	14.4030497060349	0
75.5694936380909	75.3191917586311	74.5096621830243	73.0149432920805	70.5680121178189	66.6225632090842	59.9581743909116	47.2483175025087	14.4113551507942	0
75.5712735051608	75.3209944307412	74.5115336137065	73.0169374629327	70.570204318212	66.6250797321035	59.9612698892789	47.2526505944845	14.419871500854	0
75.5730949460398	75.3228391157024	74.5134485380243	73.0189779505018	70.5724476366861	66.6276554654608	59.9644390552601	47.2570877321878	14.4285922141221	0
75.5749566949	75.3247245328622	74.5154056278547	73.0210633384878	70.574740509864	66.6302886001697	59.967679640143	47.2616257323686	14.4375109358945	0
75.5768535436293	75.3266454115685	74.5173994138426	73.0231877892299	70.5770764885746	66.6329716735125	59.9709823806973	47.2662515299768	14.446601850466	0
75.5787884010334	75.3286046963542	74.5194329532401	73.02535456848	70.5794591833169	66.635708863653	59.9743524567899	47.2709724085436	14.4558792286528	0
75.5807601029582	75.3306012094902	74.5215050247759	73.0275623740211	70.5818871567377	66.6384985074053	59.977787800806	47.2757854410542	14.4653372292508	0
75.5827675186053	75.3326338070125	74.5236144422311	73.0298099410601	70.5843590128247	66.6413389894132	59.981286404543	47.2806877845687	14.4749701794488	0
75.5848095496213	75.3347013778006	74.5257600534835	73.0320960412062	70.5868733957772	66.6442287408434	59.9848463175891	47.2856766779289	14.4847725702377	0
75.5868817157811	75.3367993879394	74.527937153914	73.0344156533307	70.5894247587761	66.6471613433544	59.9884595733824	47.2907408865207	14.4947222195878	0
75.5889865023801	75.3389303533418	74.5301483559087	73.0367715681517	70.5920161871812	66.6501403671239	59.9921305971936	47.2958866306001	14.5048313022997	0
75.5911228999102	75.3410932528235	74.5323926007092	73.039162656951	70.5946464352872	66.6531643706902	59.9958575968388	47.3011113729344	14.5150947580639	0
75.5932899279934	75.343287094687	74.5346688601672	73.0415878236888	70.5973142934831	66.6562319543516	59.9996388320117	47.306412649717	14.5255076736116	0
75.5954866345806	75.3455109159116	74.5369761359027	73.0440460041034	70.6000185872584	66.6593417590159	60.003472612857	47.3117880685485	14.5360652786671	0
75.5977091696179	75.3477608204123	74.5393103853557	73.0465328839422	70.6027545509316	66.6624882703923	60.0073520952155	47.3172279790914	14.5467485340817	0
75.5999596541084	75.3500389554138	74.5416738382461	73.0490508452994	70.6055248181356	66.6656745356934	60.0112810553873	47.3227376874755	14.5575678147686	0
75.6022372135568	75.3523444363995	74.5440655776858	73.0515989109023	70.608328310435	66.6688993069769	60.0152579416074	47.3283149967595	14.5685187420115	0
75.6045409988806	75.354676404577	74.5464847134886	73.0541761319807	70.6111639808739	66.6721613727204	60.0192812473597	47.333957774054	14.5795970653224	0
75.6068675983776	75.3570314075381	74.5489276636161	73.0567786859614	70.6140276070807	66.6754558474126	60.0233449091052	47.3396574707695	14.5907859299383	0
75.6092188818621	75.3594113382865	74.5513963939259	73.0594086731702	70.616921511194	66.6787854176628	60.0274522557162	47.3454187629898	14.6020944715007	0
75.6115940698052	75.3618154084346	74.5538900873114	73.0620652228388	70.6198447323994	66.6821489716053	60.0316019044967	47.3512396931029	14.6135187905455	0
75.6139924054597	75.3642428526545	74.5564079506015	73.0647474897454	70.622796338095	66.6855454300137	60.0357925133052	47.3571183609083	14.6250551025047	0
75.6164131542254	75.366692928036	74.5589492138931	73.0674546535024	70.6257754231033	66.6889737453898	60.0400227794227	47.3630529220143	14.6366997344925	0
75.6188533898303	75.3691626734941	74.5615108051133	73.0701834359844	70.6287783666464	66.6924297284258	60.0442875035932	47.3690360474961	14.6484382481349	0
75.6213147046695	75.3716537012632	74.5640943986975	73.0729356263117	70.6318071468248	66.6959156674774	60.04858952062	47.3750717179373	14.660278412461	0
75.6237964247421	75.3741653297718	74.5666992884062	73.0757104720392	70.6348609334848	66.6994306018386	60.0529276356295	47.3811582416211	14.6722168602099	0
75.6262978958841	75.376696897527	74.5693247888391	73.0785072429607	70.6379389210293	66.7029735992129	60.0573006890491	47.3872939768075	14.6842503240911	0
75.6288184832118	75.3792477625513	74.5719702348498	73.0813252304838	70.641040327727	66.7065437549139	60.0617075556148	47.3934773303273	14.6963756339641	0
75.6313556794935	75.3818153878826	74.5746329945683	73.0841616264294	70.6441620520449	66.7101374805115	60.066143781974	47.3997020257092	14.7085804349739	0
75.6339108392522	75.3844011450079	74.5773144925424	73.0870179530578	70.6473057770659	66.7137567228722	60.0706117793515	47.4059714474734	14.7208713262397	0
75.6364833803463	75.387004445333	74.5800141190268	73.0898935608924	70.6504707863273	66.7174006528147	60.0751105163103	47.4122841352855	14.7332454033896	0
75.639072737889	75.389624717728	74.5827312823999	73.0927878197954	70.6536563847179	66.7210684658584	60.0796389921072	47.4186386722666	14.7456998489293	0
75.6416783637607	75.3922614080335	74.5854654086514	73.0957001184195	70.6568618978719	66.7247593815225	60.0841962358232	47.4250336837611	14.75823192977	0
75.6442981120771	75.3949123450135	74.5882142454913	73.0986280537921	70.6600846719461	66.7284703294254	60.088778437151	47.4314638004759	14.7708310855672	0
75.6469331336357	75.397578693964	74.5909790034415	73.1015729196017	70.6633261373299	66.7322029639528	60.093387644588	47.4379318966766	14.7835029150586	0
75.6495829261717	75.4002599471358	74.5937591566504	73.1045341558805	70.6665856763773	66.7359565702375	60.0980229687551	47.4444367131483	14.7962449159853	0
75.6522470024132	75.4029556119538	74.5965541950114	73.1075112194586	70.6698626899861	66.7397304548642	60.1026835469318	47.4509770284184	14.8090546614969	0
75.6549234669671	75.4056637707049	74.5993621293529	73.1105019882314	70.6731548346113	66.743521906501	60.107366014472	47.4575481018277	14.8219228339495	0
75.6576133307035	75.4083854470621	74.6021840231867	73.1135075988785	70.6764633670601	66.7473323786296	60.1120721707544	47.4641524573118	14.8348543459123	0
75.6603161473437	75.4111201899379	74.6050194094528	73.1165275541488	70.6797877389157	66.7511612364668	60.1168012259253	47.4707889765603	14.8478469767025	0
75.6630314840063	75.4138675618035	74.6078678351585	73.1195613717967	70.6831274183249	66.7550078643902	60.1215524139434	47.4774565749755	14.8608985729574	0
75.6657589208235	75.4166271383	74.6107288609752	73.1226085841515	70.6864818895218	66.7588716653868	60.1263249918955	47.4841542007022	14.8740070466902	0
75.6684968387515	75.4193972814042	74.613600787996	73.1256673789388	70.6898491512392	66.7627503241602	60.1311160866731	47.4908778063065	14.8871644495379	0
75.6712460947399	75.422178859	74.616484518012	73.1287387201109	70.6932302693223	66.7666450731871	60.135927223655	47.4976295305297	14.9003749403518	0
75.6740063044925	75.4249714827269	74.6193796490401	73.1318221798269	70.6966247719636	66.7705553663036	60.1407577231255	47.5044084109867	14.913636609827	0
75.6767770953322	75.4277747759824	74.6222857912942	73.1349173432543	70.700032201712	66.7744806739531	60.1456069260086	47.5112135145127	14.9269476069668	0
75.6795581058652	75.4305883735823	74.6252025668332	73.1380238081925	70.7034521150574	66.7784204827049	60.1504741932709	47.5180439363155	14.9403061373857	0
75.6823479546355	75.4334108779577	74.6281285262849	73.1411400287051	70.7068828049451	66.7823728176663	60.1553570742681	47.5248962246625	14.953705428397	0
75.6851473672043	75.4362430240061	74.6310644333835	73.1442668212821	70.710325174187	66.7863387226443	60.1602568605103	47.5317721896353	14.9671489964516	0
75.6879560130125	75.4390844777448	74.6340099425514	73.1474038182327	70.7137788173542	66.7903177282575	60.1651729677132	47.5386710039489	14.9806352018412	0
75.6907735715659	75.4419349153761	74.6369647187751	73.15055066313	70.717243341447	66.7943093795022	60.170104829463	47.5455918656159	14.9941624553012	0
75.6935997321435	75.4447940229911	74.6399284372976	73.1537070104826	70.7207183655329	66.7983132353329	60.1750518966945	47.5525339972076	15.0077292165306	0
75.6964333173284	75.4476606095179	74.6428998630307	73.1568715430527	70.7242024351746	66.8023276131205	60.1800120814589	47.5594944583198	15.0213297211562	0
75.6992749406655	75.4505352964703	74.6458796419945	73.1600449515882	70.7276963141605	66.8063533957984	60.1849864758897	47.5664747789484	15.0349669387599	0
75.7021243181323	75.4534177969538	74.6488674774471	73.1632269204641	70.7311996545104	66.8103901804366	60.1899745782987	47.5734742487318	15.0486394627814	0
75.7049811744168	75.4563078328867	74.6518630817858	73.1664171437984	70.7347121189929	66.8144375765386	60.1949759024521	47.580492179185	15.0623459302491	0
75.7073681772975	75.4587225339108	74.6543659544314	73.1690826094775	70.7376468531222	66.8178193428052	60.1991548186903	47.5863560760884	15.0737981781058	0
75.7097546278282	75.4611366490215	74.6568681785894	73.1717473542365	70.7405807990252	66.8212002500083	60.2033327320158	47.592218468977	15.085245761989	0
75.712140874336	75.4635505360111	74.6593701344571	73.174411792498	70.7435144197133	66.8245808379278	60.2075103337803	47.5980804601746	15.0966920793785	0
75.7145269160607	75.465964194427	74.6618718221394	73.1770759250346	70.7464477164907	66.8279611079793	60.2116876248782	47.6039420496823	15.1081371266437	0
75.7169127522538	75.468377623827	74.6643732417469	73.1797397526178	70.7493806906504	66.8313410615583	60.2158646061914	47.6098032374414	15.1195809002852	0
75.7192983821784	75.470790823779	74.6668743933968	73.1824032760175	70.7523133434741	66.834720700041	60.2200412785878	47.6156640233417	15.1310233969135	0
75.7216838051091	75.473203793861	74.6693752772118	73.1850664960022	70.7552456762329	66.8381000247844	60.2242176429202	47.6215244072284	15.1424646132336	0
75.7240690203323	75.4756165336608	74.6718758933207	73.1877294133388	70.7581776901863	66.8414790371269	60.2283937000256	47.627384388908	15.1539045460319	0
75.7264540271455	75.4780290427763	74.6743762418581	73.1903920287926	70.7611093865833	66.8448577383886	60.2325694507241	47.6332439681534	15.165343192167	0
75.7288388248578	75.4804413208151	74.6768763229641	73.193054343127	70.7640407666616	66.8482361298711	60.2367448958189	47.6391031447077	15.176780548562	0
75.7312234127895	75.4828533673944	74.6793761367844	73.1957163571038	70.7669718316483	66.8516142128587	60.2409200360957	47.6449619182878	15.1882166121986	0
75.7336077902722	75.4852651821411	74.6818756834701	73.1983780714828	70.7699025827595	66.8549919886176	60.2450948723228	47.650820288588	15.1996513801124	0
75.7359919566486	75.4876767646916	74.6843749631776	73.2010394870219	70.7728330212004	66.8583694583969	60.2492694052507	47.6566782552822	15.2110848493889	0
75.7383759112728	75.4900881146918	74.6868739760685	73.2037006044772	70.7757631481656	66.8617466234284	60.2534436356125	47.6625358180262	15.2225170171609	0
75.7407596535097	75.4924992317967	74.6893727223096	73.2063614246024	70.7786929648391	66.8651234849271	60.2576175641237	47.66839297646	15.2339478806056	0
75.7431431827352	75.4949101156708	74.6918712020727	73.2090219481493	70.7816224723941	66.868500044091	60.2617911914824	47.6742497302096	15.2453774369431	0
75.7455264983362	75.4973207659877	74.6943694155345	73.2116821758676	70.7845516719933	66.8718763021016	60.2659645183697	47.6801060788882	15.256805683434	0
75.7479095997104	75.4997311824299	74.6968673628764	73.2143421085046	70.787480564789	66.8752522601241	60.2701375454495	47.6859620220981	15.2682326173785	0
75.7502924862662	75.5021413646891	74.6993650442847	73.2170017468053	70.7904091519227	66.8786279193073	60.2743102733692	47.6918175594317	15.279658236115	0
75.7526751574229	75.5045513124657	74.7018624599502	73.2196610915125	70.7933374345259	66.882003280784	60.2784827027598	47.6976726904726	15.2910825370188	0
75.7550576126102	75.5069610254689	74.7043596100684	73.2223201433665	70.7962654137196	66.8853783456713	60.2826548342362	47.7035274147967	15.3025055175014	0
75.7574398512685	75.5093705034167	74.7068564948388	73.2249789031053	70.7991930906145	66.8887531150704	60.2868266683975	47.7093817319731	15.3139271750095	0
75.7598218728487	75.5117797460358	74.7093531144659	73.2276373714643	70.8021204663111	66.8921275900671	60.2909982058273	47.7152356415648	15.325347507024	0
75.7622036768119	75.5141887530612	74.7118494691578	73.2302955491763	70.8050475418997	66.8955017717318	60.2951694470943	47.7210891431295	15.3367665110595	0
75.7645852626299	75.5165975242365	74.7143455591271	73.2329534369718	70.8079743184606	66.8988756611199	60.2993403927521	47.7269422362204	15.3481841846635	0
75.7669666297843	75.5190060593135	74.7168413845906	73.2356110355784	70.8109007970639	66.9022492592717	60.3035110433401	47.7327949203866	15.359600525416	0
75.7693477777674	75.5214143580524	74.7193369457686	73.2382683457212	70.81382697877	66.9056225672127	60.3076813993836	47.7386471951738	15.3710155309281	0
75.7717287060811	75.5238224202215	74.7218322428859	73.2409253681225	70.8167528646291	66.908995585954	60.311851461394	47.7444990601247	15.3824291988425	0
75.7741094142377	75.5262302455972	74.7243272761706	73.243582103502	70.8196784556816	66.912368316492	60.3160212298694	47.7503505147793	15.3938415268319	0
75.7764899017593	75.528637833964	74.7268220458547	73.2462385525765	70.8226037529582	66.9157407598089	60.3201907052948	47.756201558676	15.4052525125991	0
75.7788701681778	75.5310451851141	74.729316552174	73.24889471606	70.8255287574799	66.9191129168731	60.3243598881424	47.7620521913508	15.4166621538761	0
75.7812502130351	75.5334522988476	74.7318107953677	73.2515505946638	70.828453470258	66.9224847886388	60.3285287788719	47.7679024123389	15.428070448424	0
75.7836300358827	75.5358591749723	74.7343047756784	73.2542061890961	70.831377892294	66.9258563760467	60.3326973779311	47.7737522211742	15.439477394032	0
75.7860096362817	75.5382658133039	74.7367984933523	73.2568615000625	70.8343020245801	66.9292276800239	60.3368656857557	47.7796016173898	15.4508829885171	0
75.7883890138029	75.5406722136654	74.7392919486387	73.2595165282654	70.8372258680991	66.9325987014842	60.3410337027703	47.7854506005183	15.4622872297238	0
75.7907681680265	75.5430783758872	74.7417851417903	73.2621712744043	70.8401494238241	66.9359694413283	60.3452014293879	47.7912991700922	15.4736901155235	0
75.793147098542	75.5454842998074	74.7442780730629	73.2648257391758	70.843072692719	66.9393399004437	60.3493688660107	47.7971473256437	15.485091643814	0
75.7955258049486	75.5478899852712	74.7467707427155	73.2674799232733	70.8459956757386	66.9427100797054	60.3535360130305	47.8029950667053	15.4964918125189	0
75.7979042868543	75.5502954321309	74.74926315101	73.2701338273875	70.8489183738283	66.9460799799756	60.3577028708285	47.80884239281	15.5078906195877	0
75.8002825438765	75.5527006402463	74.7517552982111	73.2727874522056	70.8518407879244	66.9494496021042	60.3618694397759	47.814689303491	15.5192880629947	0
75.8026605756417	75.5551056094839	74.7542471845866	73.2754407984121	70.8547629189541	66.9528189469287	60.3660357202341	47.8205357982825	15.5306841407393	0
75.8050383817853	75.5575103397174	74.7567388104071	73.2780938666881	70.8576847678357	66.9561880152747	60.370201712555	47.8263818767193	15.542078850845	0
75.8074159619519	75.5599148308272	74.7592301759458	73.2807466577118	70.8606063354786	66.9595568079556	60.3743674170811	47.8322275383372	15.5534721913592	0
75.8097933157945	75.5623190827007	74.7617212814785	73.2833991721581	70.8635276227832	66.9629253257735	60.3785328341459	47.8380727826732	15.5648641603529	0
75.8121704429753	75.5647230952318	74.7642121272838	73.2860514106988	70.8664486306413	66.9662935695186	60.3826979640741	47.8439176092655	15.5762547559203	0
75.814547343165	75.5671268683213	74.7667027136426	73.2887033740025	70.8693693599357	66.9696615399697	60.3868628071816	47.8497620176534	15.5876439761785	0
75.8169240160428	75.5695304018762	74.7691930408384	73.2913550627345	70.8722898115408	66.9730292378947	60.3910273637763	47.8556060073779	15.5990318192668	0
75.8193004612968	75.5719336958104	74.7716831091571	73.2940064775572	70.8752099863224	66.9763966640502	60.3951916341577	47.8614495779811	15.6104182833469	0
75.8216766786231	75.5743367500439	74.7741729188867	73.2966576191294	70.8781298851378	66.9797638191819	60.3993556186172	47.867292729007	15.621803366602	0
75.8240526677265	75.5767395645031	74.7766624703178	73.2993084881069	70.8810495088358	66.983130704025	60.4035193174389	47.8731354600012	15.6331870672369	0
75.8264284283199	75.5791421391206	74.7791517637428	73.3019590851421	70.8839688582568	66.9864973193039	60.407682730899	47.8789777705109	15.6445693834773	0
75.8288039601246	75.5815444738353	74.7816407994566	73.3046094108844	70.8868879342332	66.9898636657328	60.4118458592664	47.8848196600851	15.6559503135698	0
75.8311792628699	75.5839465685919	74.784129577756	73.3072594659796	70.8898067375887	66.9932297440154	60.4160087028029	47.8906611282746	15.6673298557815	0
75.8335543362931	75.5863484233414	74.7866180989398	73.3099092510703	70.8927252691394	66.9965955548457	60.4201712617634	47.8965021746322	15.6787080083995	0
75.8359291801396	75.5887500380406	74.7891063633088	73.3125587667961	70.895643529693	66.9999610989075	60.4243335363959	47.9023427987125	15.6900847697307	0
75.8383037941627	75.591151412652	74.7915943711656	73.3152080137929	70.8985615200493	67.003326376875	60.4284955269418	47.9081830000722	15.7014601381018	0
75.8406781781234	75.5935525471442	74.7940821228149	73.3178569926936	70.9014792410002	67.0066913894125	60.4326572336359	47.91402277827	15.7128341118586	0
75.8430523317906	75.5959534414912	74.7965696185628	73.3205057041276	70.9043966933297	67.0100561371752	60.4368186567068	47.9198621328664	15.7242066893658	0
75.8454262549406	75.5983540956726	74.7990568587175	73.3231541487212	70.9073138778141	67.0134206208088	60.4409797963771	47.9257010634244	15.7355778690069	0
75.8477999473575	75.6007545096739	74.8015438435886	73.3258023270971	70.9102307952219	67.0167848409497	60.4451406528632	47.9315395695087	15.7469476491837	0
75.8501734088329	75.6031546834857	74.8040305734875	73.3284502398749	70.9131474463142	67.0201487982255	60.4493012263756	47.9373776506866	15.7583160283164	0
75.8525466391657	75.6055546171041	74.806517048727	73.3310978876709	70.9160638318442	67.0235124932548	60.4534615171194	47.943215306527	15.7696830048428	0
75.8549196381622	75.6079543105306	74.8090032696216	73.3337452710979	70.9189799525579	67.0268759266473	60.4576215252938	47.9490525366016	15.7810485772186	0
75.8572924056359	75.6103537637719	74.8114892364872	73.3363923907656	70.9218958091938	67.0302390990045	60.4617812510928	47.9548893404838	15.7924127439166	0
75.8596649414077	75.6127529768398	74.8139749496409	73.3390392472801	70.9248114024831	67.0336020109189	60.465940694705	47.9607257177494	15.803775503427	0
75.8620372453053	75.6151519497514	74.8164604094016	73.3416858412446	70.9277267331496	67.036964662975	60.4700998563138	47.9665616679767	15.8151368542568	0
75.8644093171636	75.6175506825285	74.8189456160891	73.3443321732585	70.9306418019101	67.0403270557489	60.4742587360977	47.9723971907458	15.8264967949296	0
75.8667811568245	75.6199491751983	74.8214305700247	73.3469782439181	70.9335566094741	67.0436891898088	60.4784173342301	47.9782322856394	15.8378553239856	0
75.8691527641368	75.6223474277925	74.8239152715309	73.3496240538166	70.9364711565443	67.0470510657147	60.4825756508797	47.9840669522423	15.8492124399809	0
75.8715241389558	75.6247454403478	74.8263997209313	73.3522696035436	70.9393854438161	67.0504126840189	60.4867336862105	47.9899011901416	15.8605681414879	0
75.873895281144	75.6271432129056	74.8288839185507	73.3549148936855	70.9422994719783	67.0537740452661	60.490891440382	47.9957349989269	15.8719224270946	0
75.8762661905701	75.6295407455122	74.8313678647149	73.3575599248254	70.9452132417126	67.0571351499931	60.495048913549	48.0015683781898	15.8832752954046	0
75.8786368671096	75.6319380382181	74.8338515597509	73.3602046975431	70.9481267536942	67.0604959987294	60.4992061058622	48.0074013275244	15.8946267450368	0
75.8810073106446	75.6343350910787	74.8363350039866	73.362849212415	70.9510400085913	67.0638565919972	60.5033630174678	48.013233846527	15.9059767746251	0
75.8833775210633	75.6367319041538	74.8388181977508	73.3654934700145	70.9539530070657	67.0672169303114	60.507519648508	48.0190659347963	15.9173253828187	0
75.8857474982606	75.6391284775075	74.8413011413733	73.3681374709114	70.9568657497726	67.0705770141797	60.511675999121	48.0248975919332	15.928672568281	0
75.8881172421374	75.6415248112084	74.8437838351847	73.3707812156725	70.9597782373607	67.0739368441027	60.5158320694407	48.030728817541	15.9400183296904	0
75.890486752601	75.6439209053293	74.8462662795167	73.3734247048612	70.9626904704722	67.0772964205745	60.5199878595974	48.0365596112253	15.9513626657394	0
75.8928560295647	75.6463167599472	74.8487484747014	73.3760679390377	70.9656024497431	67.0806557440818	60.5241433697176	48.0423899725939	15.9627055751348	0
75.8952250729479	75.6487123751433	74.851230421072	73.3787109187589	70.9685141758029	67.0840148151051	60.5282985999241	48.0482199012569	15.974047056597	0
75.8975938826759	75.6511077510029	74.8537121189622	73.3813536445785	70.9714256492752	67.0873736341181	60.5324535503359	48.054049396827	15.9853871088607	0
75.8999624586801	75.6535028876153	74.8561935687065	73.3839961170469	70.974336870777	67.0907322015879	60.5366082210686	48.0598784589189	15.9967257306737	0
75.9023308008975	75.6558977850738	74.85867477064	73.3866383367115	70.9772478409197	67.0940905179755	60.5407626122343	48.0657070871496	16.0080629207977	0
75.9046989092711	75.6582924434757	74.8611557250985	73.3892803041163	70.9801585603083	67.0974485837353	60.5449167239419	48.0715352811385	16.0193986780073	0
75.9070667837494	75.6606868629219	74.8636364324182	73.3919220198023	70.983069029542	67.1008063993157	60.5490705562967	48.0773630405073	16.0307330010903	0
75.9094344242867	75.6630810435172	74.8661168929359	73.3945634843069	70.9859792492141	67.104163965159	60.553224109401	48.0831903648798	16.0420658888475	0
75.9118018308426	75.6654749853703	74.8685971069892	73.3972046981649	70.9888892199121	67.1075212817013	60.5573773833539	48.0890172538822	16.0533973400923	0
75.9141690033825	75.6678686885932	74.8710770749158	73.3998456619074	70.9917989422176	67.1108783493731	60.5615303782514	48.0948437071431	16.0647273536508	0
75.9165359418769	75.670262153302	74.873556797054	73.4024863760629	70.9947084167067	67.1142351685987	60.5656830941864	48.100669724293	16.0760559283615	0
75.9189026463019	75.6726553796158	74.8760362737425	73.4051268411564	70.9976176439497	67.1175917397971	60.569835531249	48.106495304965	16.0873830630752	0
75.9212691166387	75.6750483676577	74.8785155053203	73.4077670577097	71.0005266245114	67.1209480633812	60.5739876895263	48.1123204487943	16.0987087566548	0
75.9236353528738	75.6774411175538	74.880994492127	73.4104070262419	71.003435358951	67.1243041397587	60.5781395691027	48.1181451554182	16.1100330079752	0
75.9260013549989	75.6798336294338	74.8834732345023	73.4130467472686	71.0063438478223	67.1276599693316	60.5822911700598	48.1239694244764	16.1213558159232	0
75.9283671230105	75.6822259034308	74.8859517327862	73.4156862213025	71.0092520916737	67.1310155524968	60.5864424924764	48.1297932556108	16.1326771793971	0
75.9307326569104	75.684617939681	74.8884299873191	73.4183254488533	71.0121600910482	67.1343708896455	60.5905935364289	48.1356166484654	16.1439970973069	0
75.9330979567052	75.6870097383238	74.8909079984414	73.4209644304276	71.0150678464837	67.1377259811639	60.5947443019909	48.1414396026865	16.1553155685739	0
75.9354630224064	75.689401299502	74.893385766494	73.4236031665288	71.0179753585126	67.1410808274331	60.5988947892335	48.1472621179225	16.1666325921308	0
75.9378278540303	75.6917926233611	74.8958632918179	73.4262416576575	71.0208826276624	67.144435428829	60.6030449982255	48.153084193824	16.1779481669213	0
75.9401924515979	75.69418371005	74.898340574754	73.4288799043112	71.0237896544554	67.1477897857226	60.6071949290332	48.1589058300438	16.1892622919002	0
75.942556815135	75.6965745597205	74.9008176156437	73.4315179069843	71.0266964394087	67.1511438984799	60.6113445817206	48.1647270262369	16.200574966033	0
75.944920944672	75.6989651725273	74.9032944148282	73.4341556661685	71.0296029830346	67.1544977674621	60.6154939563491	48.1705477820602	16.2118861882961	0
75.9472848402436	75.701355548628	74.905770972649	73.4367931823523	71.0325092858405	67.1578513930258	60.6196430529783	48.1763680971731	16.2231959576765	0
75.9496485018893	75.703745688183	74.9082472894475	73.4394304560213	71.0354153483287	67.1612047755225	60.6237918716653	48.1821879712367	16.2345042731715	0
75.9520119296529	75.7061355913556	74.9107233655652	73.4420674876582	71.0383211709968	67.1645579152995	60.627940412465	48.1880074039146	16.245811133789	0
75.9543751235825	75.7085252583118	74.9131992013437	73.4447042777428	71.0412267543377	67.1679108126992	60.6320886754305	48.1938263948723	16.2571165385469	0
75.9567380837305	75.7109146892202	74.9156747971243	73.4473408267519	71.0441320988394	67.1712634680597	60.6362366606125	48.1996449437774	16.2684204864734	0
75.9591008101537	75.7133038842523	74.9181501532486	73.4499771351595	71.0470372049853	67.1746158817148	60.6403843680599	48.2054630502996	16.2797229766066	0
75.9614633029129	75.7156928435818	74.9206252700579	73.4526132034368	71.0499420732544	67.1779680539936	60.6445317978195	48.2112807141107	16.2910240079946	0
75.9638255620731	75.7180815673852	74.9231001478935	73.455249032052	71.0528467041207	67.1813199852212	60.6486789499361	48.2170979348844	16.3023235796952	0
75.9661875877034	75.7204700558416	74.9255747870967	73.4578846214705	71.055751098054	67.1846716757183	60.6528258244529	48.2229147122966	16.3136216907757	0
75.9685493798767	75.7228583091324	74.9280491880085	73.460519972155	71.0586552555197	67.1880231258016	60.6569724214109	48.2287310460251	16.3249183403133	0
75.9709109386702	75.7252463274413	74.9305233509698	73.4631550845652	71.0615591769786	67.1913743357835	60.6611187408495	48.23454693575	16.3362135273943	0
75.9732722641645	75.7276341109545	74.9329972763214	73.4657899591582	71.0644628628871	67.1947253059725	60.6652647828062	48.2403623811531	16.3475072511145	0
75.9756333564445	75.7300216598606	74.9354709644039	73.4684245963882	71.0673663136974	67.1980760366731	60.669410547317	48.2461773819182	16.3587995105789	0
75.9779942155986	75.7324089743503	74.9379444155576	73.4710589967067	71.0702695298575	67.2014265281858	60.6735560344158	48.2519919377313	16.3700903049017	0
75.9803548417188	75.7347960546167	74.9404176301228	73.4736931605625	71.0731725118111	67.2047767808074	60.6777012441353	48.2578060482802	16.3813796332059	0
75.9827152349011	75.7371829008549	74.9428906084394	73.4763270884016	71.0760752599977	67.2081267948306	60.6818461765062	48.2636197132548	16.3926674946237	0
75.9850753952448	75.7395695132622	74.945363350847	73.4789607806672	71.0789777748526	67.2114765705447	60.6859908315579	48.2694329323467	16.4039538882959	0
75.9874353228529	75.7419558920381	74.947835857685	73.4815942378001	71.0818800568073	67.214826108235	60.6901352093179	48.2752457052497	16.4152388133722	0
75.9897950178318	75.7443420373841	74.9503081292925	73.4842274602382	71.0847821062889	67.2181754081834	60.6942793098124	48.2810580316593	16.4265222690108	0
75.9921544802914	75.7467279495036	74.9527801660084	73.4868604484169	71.0876839237209	67.221524470668	60.6984231330662	48.2868699112732	16.4378042543784	0
75.9945137103449	75.7491136286021	74.9552519681711	73.4894932027687	71.0905855095226	67.2248732959635	60.7025666791025	48.2926813437907	16.4490847686504	0
75.9968727081089	75.7514990748871	74.9577235361187	73.4921257237238	71.0934868641095	67.2282218843411	60.7067099479429	48.2984923289131	16.4603638110101	0
75.9992314737032	75.7538842885678	74.9601948701891	73.4947580117096	71.0963879878931	67.2315702360685	60.7108529396081	48.3043028663437	16.4716413806496	0
76.0015900072509	75.7562692698554	74.9626659707197	73.4973900671509	71.0992888812814	67.23491835141	60.7149956541168	48.3101129557874	16.4829174767687	0
76.0039483088782	75.7586540189628	74.9651368380474	73.5000218904701	71.1021895446783	67.2382662306267	60.7191380914869	48.3159225969512	16.4941920985755	0
76.0063063787146	75.7610385361047	74.967607472509	73.5026534820869	71.1050899784842	67.2416138739763	60.7232802517347	48.3217317895438	16.5054652452861	0
76.0086642168922	75.7634228214978	74.9700778744407	73.5052848424184	71.1079901830957	67.2449612817132	60.7274221348753	48.3275405332758	16.5167369161245	0
76.0110218235467	75.7658068753601	74.9725480441782	73.5079159718794	71.1108901589059	67.2483084540887	60.7315637409225	48.3333488278596	16.5280071103224	0
76.0133791988164	75.7681906979114	74.9750179820569	73.510546870882	71.113789906304	67.251655391351	60.735705069889	48.3391566730093	16.5392758271194	0
76.0157363428426	75.7705742893733	74.9774876884117	73.5131775398359	71.1166894256761	67.2550020937452	60.739846121786	48.3449640684411	16.5505430657627	0
76.0180932557695	75.7729576499687	74.9799571635772	73.5158079791484	71.1195887174043	67.2583485615131	60.743986896624	48.3507710138725	16.5618088255071	0
76.020449937744	75.7753407799224	74.9824264078872	73.5184381892241	71.1224877818676	67.2616947948937	60.7481273944118	48.3565775090232	16.5730731056148	0
76.022806388916	75.7777236794604	74.9848954216752	73.5210681704654	71.1253866194413	67.2650407941231	60.7522676151575	48.3623835536144	16.5843359053555	0
76.0251626094378	75.7801063488103	74.9873642052742	73.5236979232722	71.1282852304974	67.2683865594342	60.7564075588679	48.3681891473692	16.5955972240063	0
76.0275185994648	75.7824887882012	74.9898327590167	73.526327448042	71.1311836154046	67.2717320910572	60.7605472255488	48.3739942900125	16.6068570608515	0
76.0298743591546	75.7848709978635	74.9923010832347	73.5289567451699	71.1340817745282	67.2750773892196	60.7646866152049	48.3797989812706	16.6181154151825	0
76.0322298886677	75.7872529780292	74.9947691782594	73.5315858150486	71.1369797082301	67.2784224541457	60.7688257278398	48.3856032208718	16.629372286298	0
76.034585188167	75.7896347289313	74.9972370444219	73.5342146580685	71.1398774168693	67.2817672860572	60.7729645634562	48.391407008546	16.6406276735036	0
76.0369402578178	75.7920162508045	74.9997046820523	73.5368432746177	71.1427749008012	67.2851118851734	60.7771031220559	48.3972103440249	16.651881576112	0
76.0392950977881	75.7943975438844	75.0021720914805	73.5394716650818	71.1456721603781	67.2884562517104	60.7812414036394	48.4030132270418	16.6631339934427	0
76.041649708248	75.7967786084082	75.0046392730356	73.5420998298443	71.1485691959494	67.2918003858819	60.7853794082067	48.4088156573315	16.674384924822	0
76.0440040893703	75.7991594446141	75.0071062270462	73.5447277692862	71.1514660078611	67.295144287899	60.7895171357564	48.4146176346307	16.6856343695831	0
76.0463582413298	75.8015400527415	75.0095729538402	73.5473554837865	71.1543625964563	67.2984879579703	60.7936545862865	48.4204191586778	16.6968823270659	0
76.0487121643038	75.8039204330312	75.0120394537451	73.5499829737216	71.1572589620749	67.3018313963015	60.7977917597942	48.4262202292125	16.7081287966166	0
76.0510658584717	75.8063005857247	75.0145057270877	73.5526102394659	71.1601551050541	67.3051746030962	60.8019286562754	48.4320208459765	16.7193737775885	0
76.0534193240151	75.8086805110649	75.0169717741939	73.5552372813916	71.1630510257277	67.3085175785554	60.8060652757256	48.4378210087128	16.7306172693408	0
76.0557725611179	75.8110602092957	75.0194375953895	73.5578640998685	71.1659467244269	67.3118603228775	60.8102016181393	48.4436207171662	16.7418592712397	0
76.0581255699659	75.8134396806621	75.0219031909992	73.5604906952644	71.1688422014799	67.3152028362588	60.8143376835102	48.4494199710831	16.7530997826574	0
76.0604783507471	75.81581892541	75.0243685613473	73.5631170679446	71.1717374572119	67.3185451188929	60.8184734718311	48.4552187702113	16.7643388029724	0
76.0628309036515	75.8181979437863	75.0268337067574	73.5657432182727	71.1746324919455	67.3218871709713	60.8226089830941	48.4610171143004	16.7755763315697	0
76.065183228871	75.8205767360389	75.0292986275523	73.5683691466097	71.1775273060001	67.3252289926831	60.8267442172906	48.4668150031015	16.7868123678402	0
76.0675353265997	75.8229553024166	75.0317633240543	73.5709948533148	71.1804218996928	67.3285705842152	60.8308791744113	48.4726124363671	16.7980469111811	0
76.0698871970333	75.8253336431691	75.034227796585	73.5736203387449	71.1833162733376	67.3319119457522	60.8350138544459	48.4784094138514	16.8092799609957	0
76.0722388403695	75.8277117585469	75.0366920454653	73.5762456032548	71.186210427246	67.3352530774764	60.8391482573838	48.4842059353101	16.820511516693	0
76.0745902568079	75.8300896488015	75.0391560710153	73.5788706471973	71.1891043617265	67.3385939795682	60.8432823832132	48.4900020005004	16.8317415776884	0
76.0769414465499	75.832467314185	75.0416198735545	73.5814954709231	71.1919980770853	67.3419346522056	60.8474162319222	48.495797609181	16.8429701434027	0
76.0792924097986	75.8348447549507	75.0440834534018	73.5841200747808	71.1948915736258	67.3452750955646	60.8515498034977	48.501592761112	16.8541972132629	0
76.0816431467587	75.8372219713521	75.0465468108751	73.5867444591169	71.1977848516487	67.348615309819	60.8556830979264	48.5073874560554	16.8654227867017	0
76.0839936576368	75.8395989636439	75.0490099462919	73.5893686242761	71.2006779114524	67.3519552951406	60.859816115194	48.5131816937741	16.8766468631573	0
76.0863439426411	75.8419757320812	75.0514728599689	73.5919925706007	71.2035707533325	67.3552950516993	60.8639488552857	48.5189754740329	16.8878694420738	0
76.0886940019814	75.8443522769202	75.0539355522218	73.5946162984314	71.2064633775821	67.3586345796628	60.8680813181863	48.524768796598	16.8990905229009	0
76.091043835869	75.8467285984172	75.0563980233659	73.5972398081067	71.209355784492	67.3619738791968	60.8722135038797	48.5305616612368	16.9103101050938	0
76.0933934445168	75.8491046968297	75.0588602737157	73.5998630999632	71.2122479743504	67.3653129504653	60.8763454123495	48.5363540677184	16.9215281881131	0
76.0957428281394	75.8514805724156	75.0613223035848	73.6024861743354	71.2151399474431	67.3686517936302	60.8804770435784	48.5421460158132	16.932744771425	0
76.0980919869525	75.8538562254332	75.0637841132862	73.6051090315561	71.2180317040534	67.3719904088515	60.8846083975489	48.5479375052932	16.943959854501	0
76.1004409211737	75.8562316561416	75.0662457031321	73.6077316719559	71.2209232444623	67.3753287962873	60.8887394742428	48.5537285359316	16.9551734368182	0
76.1027896310216	75.8586068648005	75.0687070734338	73.6103540958637	71.2238145689485	67.378666956094	60.8928702736413	48.559519107503	16.9663855178587	0
76.1051381167163	75.86098185167	75.0711682245021	73.6129763036064	71.2267056777882	67.382004888426	60.8970007957251	48.5653092197837	16.9775960971099	0
76.1074863784796	75.8633566170108	75.0736291566469	73.6155982955091	71.2295965712556	67.385342593436	60.9011310404747	48.5710988725511	16.9888051740646	0
76.109834416534	75.865731161084	75.0760898701773	73.6182200718948	71.2324872496222	67.388680071275	60.9052610078696	48.5768880655839	17.0000127482206	0
76.1121822311038	75.8681054841511	75.0785503654016	73.6208416330849	71.2353777131575	67.3920173220921	60.9093906978893	48.5826767986626	17.0112188190809	0
76.1145298224144	75.8704795864744	75.0810106426275	73.6234629793988	71.2382679621289	67.3953543460348	60.9135201105125	48.5884650715685	17.0224233861534	0
76.1168771906923	75.8728534683162	75.0834707021617	73.6260841111541	71.2411579968012	67.3986911432489	60.9176492457176	48.5942528840847	17.0336264489512	0
76.1192243361654	75.8752271299395	75.0859305443102	73.6287050286667	71.2440478174374	67.4020277138783	60.9217781034826	48.6000402359955	17.0448280069923	0
76.1215712590626	75.8776005716075	75.0883901693783	73.6313257322504	71.246937424298	67.4053640580654	60.9259066837848	48.6058271270863	17.0560280597997	0
76.123917959614	75.8799737935839	75.0908495776702	73.6339462222176	71.2498268176417	67.4087001759512	60.9300349866014	48.6116135571443	17.067226606901	0
76.1262644380508	75.8823467961327	75.0933087694898	73.6365664988785	71.2527159977249	67.4120360676747	60.9341630119091	48.6173995259576	17.0784236478291	0
76.1286106946053	75.8847195795181	75.0957677451397	73.6391865625419	71.2556049648019	67.4153717333734	60.938290759684	48.6231850333157	17.0896191821214	0
76.1309567295109	75.887092144005	75.0982265049219	73.6418064135146	71.2584937191249	67.4187071731835	60.9424182299021	48.6289700790096	17.10081320932	0
76.1333025430019	75.8894644898581	75.1006850491378	73.6444260521018	71.2613822609442	67.4220423872393	60.9465454225387	48.6347546628314	17.1120057289719	0
76.1356481353137	75.8918366173427	75.1031433780876	73.6470454786069	71.264270590508	67.4253773756739	60.950672337569	48.6405387845744	17.1231967406286	0
76.1379935066827	75.8942085267242	75.1056014920709	73.6496646933315	71.2671587080625	67.4287121386185	60.9547989749678	48.6463224440335	17.1343862438465	0
76.140338657346	75.8965802182683	75.1080593913866	73.6522836965757	71.2700466138517	67.4320466762032	60.9589253347093	48.6521056410045	17.1455742381863	0
76.142683587542	75.898951692241	75.1105170763324	73.6549024886377	71.2729343081181	67.4353809885564	60.9630514167676	48.6578883752847	17.1567607232133	0
76.1450282975097	75.9013229489083	75.1129745472057	73.6575210698142	71.2758217911019	67.4387150758051	60.9671772211164	48.6636706466725	17.1679456984974	0
76.147372787489	75.9036939885367	75.1154318043026	73.6601394404001	71.2787090630415	67.4420489380749	60.9713027477291	48.6694524549677	17.1791291636129	0
76.1497170577207	75.9060648113924	75.1178888479186	73.6627576006887	71.2815961241733	67.4453825754901	60.9754279965787	48.6752337999713	17.1903111181387	0
76.1520611084465	75.9084354177423	75.1203456783483	73.6653755509716	71.2844829747319	67.4487159881733	60.9795529676379	48.6810146814853	17.2014915616578	0
76.1544049399087	75.910805807853	75.1228022958856	73.6679932915389	71.2873696149502	67.452049176246	60.9836776608792	48.6867950993131	17.2126704937578	0
76.1567485523506	75.9131759819915	75.1252587008235	73.6706108226789	71.290256045059	67.4553821398282	60.9878020762746	48.6925750532595	17.2238479140305	0
76.1590919460159	75.9155459404247	75.1277148934541	73.6732281446784	71.2931422652873	67.4587148790388	60.9919262137961	48.6983545431301	17.2350238220719	0
76.1614351211494	75.9179156834198	75.1301708740687	73.6758452578227	71.2960282758626	67.462047393995	60.9960500734151	48.704133568732	17.2461982174825	0
76.1637780779963	75.9202852112439	75.1326266429577	73.6784621623952	71.2989140770101	67.465379684813	61.0001736551031	48.7099121298733	17.2573710998668	0
76.1661208168027	75.9226545241642	75.1350822004108	73.6810788586781	71.3017996689537	67.4687117516076	61.0042969588309	48.7156902263634	17.2685424688335	0
76.1684633378151	75.9250236224481	75.1375375467168	73.6836953469518	71.3046850519155	67.4720435944924	61.0084199845694	48.7214678580128	17.2797123239954	0
76.1708056412809	75.9273925063628	75.1399926821637	73.6863116274952	71.3075702261155	67.4753752135795	61.0125427322891	48.7272450246333	17.2908806649696	0
76.1731477274478	75.9297611761756	75.1424476070385	73.6889277005857	71.3104551917724	67.4787066089802	61.0166652019602	48.7330217260376	17.302047491377	0
76.1754895965644	75.932129632154	75.1449023216275	73.691543566499	71.313339949103	67.4820377808042	61.0207873935529	48.7387979620398	17.3132128028428	0
76.1778312488797	75.9344978745652	75.1473568262161	73.6941592255096	71.3162244983225	67.4853687291602	61.0249093070368	48.744573732455	17.3243765989959	0
76.1801726846432	75.9368659036765	75.1498111210889	73.6967746778902	71.3191088396445	67.4886994541556	61.0290309423817	48.7503490370995	17.3355388794695	0
76.182513904105	75.9392337197552	75.1522652065296	73.6993899239122	71.3219929732808	67.4920299558967	61.0331522995569	48.7561238757907	17.3466996439003	0
76.1848549075156	75.9416013230686	75.1547190828211	73.7020049638453	71.3248768994416	67.4953602344886	61.0372733785315	48.7618982483472	17.3578588919294	0
76.1871956951261	75.9439687138837	75.1571727502454	73.704619797958	71.3277606183356	67.4986902900354	61.0413941792745	48.7676721545885	17.3690166232014	0
76.189536267188	75.9463358924676	75.1596262090837	73.7072344265171	71.33064413017	67.5020201226397	61.0455147017547	48.7734455943355	17.380172837365	0
76.1918766239532	75.9487028590874	75.1620794596162	73.709848849788	71.3335274351501	67.5053497324035	61.0496349459407	48.7792185674099	17.3913275340723	0
76.1942167656742	75.95106961401	75.1645325021225	73.7124630680348	71.3364105334799	67.5086791194272	61.0537549118008	48.7849910736347	17.4024807129797	0
76.1965566926036	75.9534361575022	75.1669853368812	73.71507708152	71.3392934253618	67.5120082838105	61.0578745993033	48.790763112834	17.413632373747	0
76.1988964049946	75.9558024898305	75.16943796417	73.7176908905047	71.3421761109967	67.5153372256519	61.0619940084162	48.7965346848327	17.4247825160378	0
76.2012359031007	75.9581686112616	75.1718903842658	73.7203044952486	71.3450585905839	67.5186659450487	61.0661131391074	48.8023057894573	17.4359311395193	0
76.2035751871757	75.9605345220618	75.1743425974447	73.7229178960101	71.3479408643213	67.5219944420974	61.0702319913446	48.8080764265348	17.4470782438625	0
76.2059142574738	75.9629002224973	75.176794603982	73.725531093046	71.3508229324053	67.5253227168933	61.0743505650954	48.8138465958935	17.4582238287419	0
76.2082531142496	75.9652657128343	75.1792464041518	73.7281440866119	71.3537047950307	67.5286507695308	61.0784688603271	48.8196162973629	17.4693678938357	0
76.2105917577576	75.9676309933386	75.1816979982278	73.730756876962	71.3565864523911	67.5319786001031	61.0825868770071	48.8253855307734	17.4805104388257	0
76.2129301882531	75.969996064276	75.1841493864826	73.733369464349	71.3594679046784	67.5353062087027	61.0867046151025	48.8311542959563	17.491651463397	0
76.2152684059913	75.9723609259118	75.1866005691879	73.7359818490244	71.3623491520833	67.5386335954208	61.0908220745802	48.8369225927442	17.5027909672384	0
76.2176064112276	75.9747255785114	75.1890515466146	73.7385940312382	71.3652301947951	67.5419607603479	61.0949392554072	48.8426904209705	17.5139289500422	0
76.219944204218	75.9770900223399	75.1915023190329	73.7412060112393	71.3681110330014	67.5452877035735	61.0990561575501	48.8484577804699	17.5250654115041	0
76.2222817852183	75.9794542576621	75.193952886712	73.7438177892751	71.3709916668887	67.548614425186	61.1031727809757	48.8542246710778	17.5362003513232	0
76.2246191544846	75.9818182847425	75.1964032499202	73.7464293655916	71.3738720966422	67.551940925273	61.1072891256503	48.8599910926308	17.5473337692019	0
76.2269563122734	75.9841821038457	75.198853408925	73.7490407404337	71.3767523224454	67.5552672039212	61.1114051915404	48.8657570449665	17.5584656648464	0
76.229293258841	75.9865457152355	75.201303363993	73.7516519140449	71.3796323444809	67.5585932612163	61.1155209786123	48.8715225279234	17.5695960379656	0
76.2316299944442	75.988909119176	75.2037531153902	73.7542628866673	71.3825121629296	67.5619190972432	61.1196364868322	48.877287541341	17.5807248882723	0
76.2339665193396	75.9912723159305	75.2062026633813	73.756873658542	71.3853917779713	67.5652447120858	61.1237517161662	48.8830520850599	17.5918522154824	0
76.2363028337842	75.9936353057624	75.2086520082306	73.7594842299086	71.3882711897844	67.5685701058273	61.1278666665802	48.8888161589216	17.6029780193148	0
76.2386389380348	75.9959980889347	75.2111011502012	73.7620946010054	71.3911503985462	67.5718952785499	61.1319813380402	48.8945797627686	17.6141022994921	0
76.2409748323485	75.9983606657099	75.2135500895555	73.7647047720697	71.3940294044325	67.575220230335	61.136095730512	48.9003428964442	17.6252250557398	0
76.2433105169825	76.0007230363506	75.215998826555	73.7673147433372	71.3969082076178	67.5785449612631	61.1402098439614	48.906105559793	17.6363462877867	0
76.245645992194	76.0030852011186	75.2184473614605	73.7699245150428	71.3997868082757	67.581869471414	61.144323678354	48.9118677526603	17.6474659953648	0
76.24798125824	76.0054471602757	75.2208956945317	73.7725340874197	71.4026652065782	67.5851937608666	61.1484372336555	48.9176294748924	17.6585841782091	0
76.250316315378	76.0078089140833	75.2233438260277	73.7751434607002	71.4055434026963	67.5885178296989	61.1525505098313	48.9233907263365	17.669700836058	0
76.252651163865	76.0101704628024	75.2257917562066	73.7777526351153	71.4084213967997	67.5918416779883	61.156663506847	48.9291515068409	17.6808159686528	0
76.2549858039584	76.0125318066936	75.2282394853256	73.7803616108948	71.4112991890569	67.5951653058113	61.160776224668	48.9349118162547	17.6919295757379	0
76.2573202359154	76.0148929460174	75.2306870136411	73.7829703882673	71.4141767796352	67.5984887132436	61.1648886632595	48.9406716544279	17.7030416570608	0
76.2596544599933	76.0172538810336	75.2331343414089	73.7855789674602	71.4170541687007	67.6018119003602	61.169000822587	48.9464310212115	17.7141522123719	0
76.2619884764492	76.0196146120018	75.2355814688835	73.7881873486996	71.4199313564185	67.6051348672353	61.1731127026157	48.9521899164575	17.7252612414247	0
76.2643222855402	76.0219751391813	75.2380283963189	73.7907955322107	71.4228083429524	67.6084576139423	61.1772243033107	48.9579483400185	17.7363687439758	0
76.2666558875235	76.0243354628307	75.2404751239681	73.7934035182174	71.425685128465	67.611780140554	61.1813356246373	48.9637062917484	17.7474747197847	0
76.268989282656	76.0266955832086	75.2429216520833	73.7960113069424	71.428561713118	67.6151024471423	61.1854466665606	48.9694637715018	17.7585791686136	0
76.2713224711946	76.029055500573	75.2453679809159	73.7986188986072	71.4314380970717	67.6184245337786	61.1895574290456	48.9752207791341	17.769682090228	0
76.2736554533962	76.0314152151815	75.2478141107164	73.8012262934324	71.4343142804855	67.6217464005333	61.1936679120575	48.9809773145017	17.780783484396	0
76.2759882295174	76.0337747272912	75.2502600417345	73.8038334916372	71.4371902635175	67.6250680474763	61.1977781155612	48.986733377462	17.7918833508888	0
76.2783207998148	76.0361340371589	75.252705774219	73.8064404934398	71.440066046325	67.6283894746768	61.2018880395217	48.9924889678731	17.8029816894802	0
76.280653164545	76.038493145041	75.2551513084179	73.8090472990574	71.442941629064	67.6317106822032	61.2059976839041	48.998244085594	17.8140784999471	0
76.2829853239642	76.0408520511934	75.2575966445784	73.8116539087058	71.4458170118895	67.6350316701233	61.2101070486733	49.0039987304847	17.8251737820691	0
76.2853172783286	76.0432107558716	75.2600417829467	73.8142603225998	71.4486921949553	67.6383524385043	61.2142161337943	49.0097529024059	17.8362675356286	0
76.2876490278942	76.0455692593306	75.2624867237684	73.8168665409534	71.4515671784145	67.6416729874125	61.2183249392319	49.0155066012192	17.8473597604107	0
76.2899805729168	76.047927561825	75.264931467288	73.8194725639791	71.4544419624188	67.6449933169138	61.222433464951	49.0212598267872	17.8584504562033	0
76.2923119136521	76.0502856636088	75.2673760137496	73.8220783918886	71.457316547119	67.6483134270734	61.2265417109167	49.0270125789731	17.8695396227972	0
76.2946430503555	76.0526435649359	75.2698203633959	73.8246840248923	71.460190932665	67.6516333179557	61.2306496770938	49.0327648576412	17.8806272599857	0
76.2969739832823	76.0550012660593	75.2722645164691	73.8272894631998	71.4630651192055	67.6549529896247	61.2347573634472	49.0385166626565	17.8917133675648	0
76.2993047126876	76.0573587672318	75.2747084732107	73.8298947070194	71.4659391068883	67.6582724421435	61.2388647699417	49.0442679938848	17.9027979453333	0
76.3016352388261	76.0597160687056	75.277152233861	73.8324997565584	71.4688128958603	67.661591675575	61.2429718965424	49.0500188511928	17.9138809930927	0
76.3039655619524	76.0620731707325	75.2795957986598	73.8351046120232	71.4716864862672	67.6649106899811	61.247078743214	49.0557692344481	17.9249625106468	0
76.3062956823209	76.0644300735639	75.2820391678459	73.837709273619	71.4745598782539	67.6682294854232	61.2511853099216	49.0615191435188	17.9360424978025	0
76.3086256001857	76.0667867774504	75.2844823416572	73.84031374155	71.4774330719642	67.6715480619622	61.2552915966299	49.0672685782743	17.947120954369	0
76.3109553158007	76.0691432826424	75.2869253203311	73.8429180160195	71.4803060675411	67.6748664196584	61.2593976033041	49.0730175385845	17.958197880158	0
76.3132848294194	76.0714995893896	75.2893681041038	73.8455220972295	71.4831788651266	67.6781845585714	61.2635033299089	49.0787660243201	17.9692732749841	0
76.3156141412951	76.0738556979413	75.291810693211	73.8481259853814	71.4860514648617	67.6815024787605	61.2676087764095	49.0845140353527	17.9803471386642	0
76.3179432516809	76.0762116085464	75.2942530878874	73.8507296806752	71.4889238668865	67.684820180284	61.2717139427706	49.0902615715547	17.9914194710178	0
76.3202721608294	76.0785673214531	75.2966952883668	73.8533331833101	71.4917960713403	67.6881376632001	61.2758188289575	49.0960086327992	18.0024902718668	0
76.3226008689931	76.0809228369091	75.2991372948825	73.8559364934843	71.4946680783612	67.6914549275662	61.279923434935	49.1017552189602	18.0135595410358	0
76.3249293764243	76.0832781551616	75.3015791076666	73.8585396113949	71.4975398880868	67.6947719734392	61.2840277606683	49.1075013299124	18.0246272783518	0
76.3272576833745	76.0856332764574	75.3040207269507	73.8611425372383	71.5004115006534	67.6980888008754	61.2881318061224	49.1132469655314	18.0356934836441	0
76.3295857900954	76.0879882010426	75.3064621529654	73.8637452712095	71.5032829161968	67.7014054099307	61.2922355712624	49.1189921256933	18.0467581567447	0
76.331913696838	76.0903429291628	75.3089033859406	73.8663478135029	71.5061541348515	67.7047218006604	61.2963390560534	49.1247368102754	18.0578212974879	0
76.3342414038533	76.0926974610631	75.3113444261054	73.8689501643118	71.5090251567515	67.7080379731192	61.3004422604607	49.1304810191554	18.0688829057103	0
76.3365689113917	76.0950517969881	75.3137852736879	73.8715523238285	71.5118959820298	67.7113539273615	61.3045451844494	49.136224752212	18.0799429812512	0
76.3388962197032	76.0974059371817	75.3162259289157	73.8741542922444	71.5147666108184	67.714669663441	61.3086478279848	49.1419680093244	18.0910015239519	0
76.3412233290378	76.0997598818875	75.3186663920154	73.87675606975	71.5176370432487	67.7179851814111	61.3127501910322	49.1477107903727	18.1020585336563	0
76.3435502396448	76.1021136313483	75.3211066632127	73.8793576565349	71.5205072794512	67.7213004813244	61.3168522735569	49.1534530952379	18.1131140102107	0
76.3458769517731	76.1044671858065	75.3235467427328	73.8819590527875	71.5233773195554	67.7246155632333	61.3209540755242	49.1591949238016	18.1241679534635	0
76.3482034656715	76.1068205455039	75.3259866307999	73.8845602586955	71.5262471636901	67.7279304271895	61.3250555968996	49.1649362759461	18.1352203632657	0
76.3505297815883	76.1091737106816	75.3284263276375	73.8871612744458	71.5291168119834	67.7312450732445	61.3291568376485	49.1706771515544	18.1462712394702	0
76.3528558997712	76.1115266815804	75.3308658334682	73.8897621002241	71.5319862645623	67.734559501449	61.3332577977365	49.1764175505104	18.1573205819327	0
76.3551818204679	76.1138794584404	75.3333051485138	73.8923627362154	71.5348555215532	67.7378737118536	61.337358477129	49.1821574726987	18.1683683905107	0
76.3575075439253	76.116232041501	75.3357442729954	73.8949631826036	71.5377245830818	67.741187704508	61.3414588757917	49.1878969180045	18.1794146650642	0
76.35983307039	76.1185844310013	75.3381832071333	73.897563439572	71.5405934492727	67.7445014794618	61.3455589936902	49.1936358863138	18.1904594054553	0
76.3621584001085	76.1209366271795	75.340621951147	73.9001635073027	71.5434621202501	67.747815036764	61.3496588307903	49.1993743775133	18.2015026115486	0
76.3644835333265	76.1232886302736	75.3430605052553	73.902763385977	71.546330596137	67.7511283764632	61.3537583870578	49.2051123914905	18.2125442832106	0
76.3668084702894	76.1256404405207	75.345498869676	73.9053630757756	71.5491988770559	67.7544414986076	61.3578576624583	49.2108499281336	18.2235844203102	0
76.3691332112421	76.1279920581574	75.3479370446262	73.9079625768779	71.5520669631286	67.7577544032448	61.3619566569579	49.2165869873312	18.2346230227182	0
76.3714577564293	76.1303434834198	75.3503750303224	73.9105618894627	71.554934854476	67.7610670904223	61.3660553705225	49.2223235689731	18.245660090308	0
76.373782106095	76.1326947165433	75.3528128269802	73.9131610137078	71.5578025512182	67.7643795601867	61.370153803118	49.2280596729495	18.2566956229548	0
76.3761062604828	76.1350457577628	75.3552504348143	73.9157599497903	71.5606700534747	67.7676918125846	61.3742519547106	49.2337952991512	18.267729620536	0
76.3784302198359	76.1373966073126	75.3576878540387	73.9183586978862	71.5635373613642	67.7710038476621	61.3783498252663	49.23953044747	18.2787620829312	0
76.3807539843971	76.1397472654264	75.3601250848669	73.920957258171	71.5664044750047	67.7743156654647	61.3824474147514	49.2452651177982	18.2897930100222	0
76.3830775544087	76.1420977323372	75.3625621275112	73.9235556308191	71.5692713945134	67.7776272660376	61.3865447231321	49.2509993100287	18.3008224016927	0
76.3854009301123	76.1444480082774	75.3649989821833	73.926153816004	71.572138120007	67.7809386494257	61.3906417503747	49.2567330240553	18.3118502578286	0
76.3877241117495	76.1467980934791	75.3674356490943	73.9287518138986	71.5750046516011	67.7842498156734	61.3947384964457	49.2624662597723	18.3228765783178	0
76.390047099561	76.1491479881734	75.3698721284543	73.9313496246748	71.577870989411	67.7875607648249	61.3988349613115	49.2681990170748	18.3339013630503	0
76.3923698937871	76.151497692591	75.3723084204728	73.9339472485038	71.580737133551	67.7908714969235	61.4029311449386	49.2739312958585	18.3449246119182	0
76.3946924946679	76.153847206962	75.3747445253585	73.9365446855559	71.583603084135	67.7941820120128	61.4070270472938	49.2796630960198	18.3559463248155	0
76.3970149024427	76.1561965315158	75.3771804433191	73.9391419360007	71.5864688412759	67.7974923101356	61.4111226683435	49.2853944174556	18.3669665016383	0
76.3993371173503	76.1585456664813	75.379616174562	73.9417390000067	71.589334405086	67.8008023913343	61.4152180080547	49.2911252600638	18.3779851422847	0
76.4016591396293	76.1608946120867	75.3820517192936	73.944335877742	71.5921997756772	67.8041122556513	61.4193130663941	49.2968556237426	18.3890022466549	0
76.4039809695175	76.1632433685595	75.3844870777193	73.9469325693735	71.5950649531604	67.8074219031281	61.4234078433287	49.3025855083911	18.4000178146508	0
76.4063026072523	76.1655919361269	75.3869222500443	73.9495290750678	71.597929937646	67.8107313338064	61.4275023388255	49.3083149139089	18.4110318461765	0
76.4086240530706	76.1679403150152	75.3893572364725	73.9521253949901	71.6007947292436	67.8140405477271	61.4315965528514	49.3140438401963	18.422044341138	0
76.4109453072088	76.1702885054501	75.3917920372075	73.9547215293054	71.6036593280624	67.817349544931	61.4356904853737	49.3197722871543	18.4330552994433	0
76.4132663699028	76.1726365076569	75.3942266524519	73.9573174781774	71.6065237342106	67.8206583254585	61.4397841363596	49.3255002546844	18.4440647210022	0
76.4155872413879	76.1749843218599	75.3966610824075	73.9599132417695	71.6093879477962	67.8239668893496	61.4438775057765	49.3312277426889	18.4550726057265	0
76.4179079218989	76.1773319482832	75.3990953272756	73.9625088202441	71.6122519689261	67.827275236644	61.4479705935916	49.3369547510706	18.4660789535299	0
76.4202284116701	76.17967938715	75.4015293872566	73.9651042137627	71.6151157977068	67.8305833673811	61.4520633997725	49.342681279733	18.477083764328	0
76.4225487109353	76.1820266386829	75.4039632625502	73.9676994224863	71.6179794342444	67.8338912815999	61.4561559242868	49.3484073285801	18.4880870380382	0
76.4248688199277	76.184373703104	75.4063969533554	73.970294446575	71.6208428786438	67.8371989793391	61.460248167102	49.3541328975169	18.49908877458	0
76.42718873888	76.1867205806347	75.4088304598703	73.9728892861882	71.6237061310099	67.8405064606371	61.464340128186	49.3598579864484	18.5100889738745	0
76.4295084680244	76.1890672714958	75.4112637822926	73.9754839414845	71.6265691914466	67.8438137255319	61.4684318075065	49.3655825952808	18.5210876358448	0
76.4318280075925	76.1914137759074	75.4136969208189	73.9780784126218	71.6294320600573	67.8471207740613	61.4725232050315	49.3713067239206	18.5320847604157	0
76.4341473578153	76.193760094089	75.4161298756454	73.9806726997572	71.6322947369447	67.8504276062628	61.476614320729	49.377030372275	18.5430803475141	0
76.4364665189234	76.1961062262596	75.4185626469672	73.9832668030472	71.6351572222112	67.8537342221734	61.4807051545669	49.3827535402518	18.5540743970684	0
76.4387854911467	76.1984521726373	75.4209952349791	73.9858607226474	71.6380195159584	67.8570406218299	61.4847957065136	49.3884762277593	18.565066909009	0
76.4411042747147	76.2007979334399	75.4234276398749	73.9884544587129	71.6408816182872	67.8603468052689	61.4888859765373	49.3941984347067	18.576057883268	0
76.4434228698562	76.2031435088843	75.4258598618477	73.9910480113978	71.643743529298	67.8636527725266	61.4929759646063	49.3999201610033	18.5870473197794	0
76.4457412767995	76.2054888991868	75.4282919010901	73.9936413808556	71.6466052490909	67.8669585236389	61.4970656706892	49.4056414065595	18.5980352184789	0
76.4480594957724	76.2078341045633	75.4307237577936	73.9962345672391	71.649466777765	67.8702640586415	61.5011550947543	49.4113621712861	18.6090215793039	0
76.450377527002	76.2101791252287	75.4331554321494	73.9988275707006	71.6523281154192	67.8735693775695	61.5052442367704	49.4170824550943	18.6200064021936	0
76.452695370715	76.2125239613977	75.4355869243478	74.0014203913912	71.6551892621515	67.8768744804582	61.5093330967063	49.4228022578961	18.630989687089	0
76.4550130271374	76.2148686132839	75.4380182345782	74.0040130294618	71.6580502180595	67.8801793673423	61.5134216745306	49.4285215796041	18.6419714339327	0
76.4573304964947	76.2172130811006	75.4404493630297	74.0066054850623	71.6609109832404	67.8834840382562	61.5175099702124	49.4342404201314	18.6529516426692	0
76.4596477790118	76.2195573650604	75.4428803098904	74.009197758342	71.6637715577906	67.8867884932341	61.5215979837207	49.4399587793916	18.6639303132446	0
76.461964874913	76.2219014653751	75.4453110753478	74.0117898494495	71.666631941806	67.8900927323101	61.5256857150245	49.4456766572991	18.6749074456067	0
76.464281784422	76.2242453822561	75.4477416595886	74.0143817585328	71.6694921353821	67.8933967555178	61.5297731640932	49.4513940537686	18.685883039705	0
76.4665985077621	76.226589115914	75.450172062799	74.016973485739	71.6723521386138	67.8967005628905	61.5338603308959	49.4571109687156	18.6968570954906	0
76.4689150451558	76.2289326665588	75.4526022851644	74.0195650312147	71.6752119515953	67.9000041544614	61.5379472154021	49.4628274020559	18.7078296129166	0
76.4712313968252	76.2312760343999	75.4550323268693	74.0221563951059	71.6780715744206	67.9033075302633	61.5420338175814	49.4685433537062	18.7188005919372	0
76.4735475629917	76.233619219646	75.4574621880979	74.0247475775577	71.6809310071828	67.906610690329	61.5461201374032	49.4742588235836	18.7297700325088	0
76.4758635438762	76.2359622225053	75.4598918690335	74.0273385787146	71.6837902499748	67.9099136346907	61.5502061748373	49.4799738116056	18.7407379345891	0
76.4781793396988	76.2383050431852	75.4623213698586	74.0299293987207	71.6866493028887	67.9132163633805	61.5542919298536	49.4856883176904	18.7517042981376	0
76.4804949506793	76.2406476818925	75.4647506907552	74.032520037719	71.6895081660164	67.9165188764304	61.5583774024219	49.4914023417569	18.7626691231153	0
76.4828103770368	76.2429901388334	75.4671798319046	74.0351104958522	71.692366839449	67.9198211738718	61.5624625925122	49.4971158837242	18.7736324094849	0
76.4851256189897	76.2453324142135	75.4696087934873	74.0377007732622	71.6952253232773	67.9231232557362	61.5665475000946	49.5028289435123	18.7845941572107	0
76.487440676756	76.2476745082377	75.4720375756833	74.0402908700902	71.6980836175914	67.9264251220547	61.5706321251393	49.5085415210415	18.7955543662586	0
76.4897555505529	76.2500164211102	75.4744661786717	74.0428807864769	71.7009417224812	67.9297267728581	61.5747164676167	49.5142536162327	18.8065130365959	0
76.4920702405972	76.2523581530347	75.4768946026311	74.0454705225623	71.7037996380358	67.9330282081772	61.5788005274971	49.5199652290074	18.8174701681919	0
76.4943847471049	76.2546997042143	75.4793228477393	74.0480600784856	71.7066573643439	67.9363294280422	61.5828843047511	49.5256763592875	18.8284257610169	0
76.4966990702917	76.2570410748512	75.4817509141736	74.0506494543857	71.7095149014938	67.9396304324835	61.5869677993492	49.5313870069957	18.8393798150433	0
76.4990132103724	76.2593822651472	75.4841788021105	74.0532386504006	71.7123722495734	67.9429312215309	61.5910510112623	49.5370971720549	18.8503323302447	0
76.5013271675614	76.2617232753035	75.4866065117258	74.0558276666677	71.7152294086697	67.9462317952141	61.595133940461	49.5428068543888	18.8612833065963	0
76.5036409420723	76.2640641055204	75.4890340431947	74.058416503324	71.7180863788698	67.9495321535627	61.5992165869164	49.5485160539213	18.872232744075	0
76.5059545341183	76.2664047559978	75.4914613966919	74.0610051605055	71.7209431602598	67.952832296606	61.6032989505995	49.5542247705773	18.883180642659	0
76.5082679439118	76.2687452269348	75.493888572391	74.0635936383479	71.7237997529257	67.9561322243729	61.6073810314814	49.5599330042817	18.8941270023282	0
76.5105811716649	76.2710855185301	75.4963155704654	74.0661819369862	71.7266561569529	67.9594319368923	61.6114628295334	49.5656407549604	18.9050718230639	0
76.5128942175888	76.2734256309815	75.4987423910877	74.0687700565547	71.7295123724263	67.9627314341928	61.6155443447268	49.5713480225393	18.9160151048489	0
76.5152070818941	76.2757655644864	75.5011690344297	74.0713579971872	71.7323683994305	67.9660307163029	61.619625577033	49.5770548069452	18.9269568476675	0
76.5175197647911	76.2781053192413	75.5035955006626	74.0739457590169	71.7352242380493	67.9693297832508	61.6237065264237	49.5827611081054	18.9378970515055	0
76.5198322664892	76.2804448954423	75.5060217899571	74.0765333421763	71.7380798883665	67.9726286350644	61.6277871928704	49.5884669259475	18.9488357163502	0
76.5221445871973	76.2827842932848	75.5084479024831	74.0791207467974	71.7409353504651	67.9759272717715	61.631867576345	49.5941722603997	18.9597728421903	0
76.5244567271236	76.2851235129635	75.51087383841	74.0817079730115	71.7437906244279	67.9792256933997	61.6359476768194	49.5998771113907	18.9707084290159	0
76.5267686864758	76.2874625546726	75.5132995979063	74.0842950209494	71.746645710337	67.9825238999764	61.6400274942654	49.6055814788498	18.9816424768187	0
76.529080465461	76.2898014186054	75.5157251811402	74.0868818907413	71.7495006082743	67.9858218915287	61.6441070286553	49.6112853627065	18.9925749855919	0
76.5313920642856	76.292140104955	75.5181505882789	74.0894685825168	71.7523553183212	67.9891196680838	61.6481862799612	49.6169887628912	19.0035059553297	0
76.5337034831555	76.2944786139135	75.5205758194893	74.092055096405	71.7552098405585	67.9924172296682	61.6522652481554	49.6226916793345	19.0144353860283	0
76.5360147222758	76.2968169456724	75.5230008749374	74.0946414325342	71.7580641750668	67.9957145763086	61.6563439332103	49.6283941119676	19.0253632776849	0
76.5383257818513	76.2991551004229	75.5254257547887	74.0972275910324	71.7609183219262	67.9990117080315	61.6604223350985	49.6340960607221	19.0362896302983	0
76.5406366620858	76.3014930783552	75.5278504592081	74.0998135720267	71.7637722812164	68.0023086248631	61.6645004537926	49.6397975255302	19.0472144438687	0
76.5429473631828	76.3038308796589	75.5302749883598	74.1023993756441	71.7666260530165	68.0056053268293	61.6685782892653	49.6454985063246	19.0581377183975	0
76.5452578853451	76.3061685045233	75.5326993424072	74.1049850020105	71.7694796374054	68.008901813956	61.6726558414895	49.6511990030382	19.0690594538877	0
76.5475682287749	76.3085059531367	75.5351235215135	74.1075704512517	71.7723330344616	68.0121980862689	61.676733110438	49.6568990156048	19.0799796503436	0
76.5498783936736	76.3108432256871	75.537547525841	74.1101557234926	71.7751862442629	68.0154941437934	61.6808100960841	49.6625985439583	19.0908983077709	0
76.5521883802423	76.3131803223615	75.5399713555512	74.1127408188577	71.778039266887	68.0187899865549	61.6848867984009	49.6682975880334	19.1018154261766	0
76.5544981886812	76.3155172433465	75.5423950108055	74.1153257374709	71.7808921024111	68.0220856145784	61.6889632173615	49.673996147765	19.1127310055691	0
76.5568078191901	76.3178539888283	75.5448184917641	74.1179104794557	71.783744750912	68.025381027889	61.6930393529396	49.6796942230886	19.1236450459582	0
76.5591172719682	76.320190558992	75.547241798587	74.1204950449348	71.786597212466	68.0286762265113	61.6971152051084	49.6853918139401	19.1345575473549	0
76.5614265472138	76.3225269540224	75.5496649314335	74.1230794340305	71.7894494871492	68.03197121047	61.7011907738416	49.691088920256	19.1454685097716	0
76.5637356451249	76.3248631741036	75.5520878904621	74.1256636468646	71.792301575037	68.0352659797896	61.7052660591131	49.696785541973	19.1563779332221	0
76.5660445658987	76.327199219419	75.5545106758308	74.1282476835582	71.7951534762048	68.0385605344941	61.7093410608965	49.7024816790286	19.1672858177215	0
76.5683533097319	76.3295350901516	75.5569332876972	74.130831544232	71.7980051907274	68.0418548746078	61.7134157791658	49.7081773313606	19.178192163286	0
76.5706618768205	76.3318707864834	75.5593557262181	74.1334152290062	71.800856718679	68.0451490001547	61.717490213895	49.7138724989071	19.1890969699335	0
76.57297026736	76.3342063085963	75.5617779915495	74.1359987380002	71.8037080601339	68.0484429111583	61.7215643650584	49.7195671816068	19.2000002376828	0
76.5752784815452	76.3365416566712	75.5642000838472	74.1385820713332	71.8065592151656	68.0517366076424	61.7256382326301	49.7252613793989	19.2109019665542	0
76.5775865195703	76.3388768308884	75.5666220032661	74.1411652291237	71.8094101838476	68.0550300896304	61.7297118165846	49.7309550922231	19.2218021565693	0
76.5798943816288	76.3412118314277	75.5690437499607	74.1437482114897	71.8122609662525	68.0583233571455	61.7337851168963	49.7366483200192	19.2327008077509	0
76.5822020679138	76.3435466584683	75.5714653240848	74.1463310185487	71.8151115624531	68.061616410211	61.7378581335398	49.7423410627279	19.243597920123	0
76.5845095786177	76.3458813121888	75.5738867257916	74.1489136504177	71.8179619725214	68.0649092488497	61.7419308664898	49.74803332029	19.2544934937111	0
76.5868169139321	76.348215792767	75.5763079552338	74.151496107213	71.8208121965292	68.0682018730844	61.7460033157212	49.7537250926469	19.2653875285418	0
76.5891240740482	76.3505501003804	75.5787290125633	74.1540783890508	71.8236622345481	68.071494282938	61.7500754812087	49.7594163797405	19.2762800246429	0
76.5914310591566	76.3528842352056	75.5811498979316	74.1566604960463	71.826512086649	68.0747864784327	61.7541473629276	49.7651071815129	19.2871709820435	0
76.5937378694473	76.3552181974187	75.5835706114897	74.1592424283146	71.8293617529027	68.0780784595911	61.7582189608529	49.7707974979068	19.298060400774	0
76.5960445051094	76.3575519871953	75.5859911533878	74.1618241859699	71.8322112333795	68.0813702264353	61.7622902749598	49.7764873288654	19.3089482808659	0
76.5983509663318	76.3598856047102	75.5884115237756	74.1644057691263	71.8350605281494	68.0846617789875	61.7663613052237	49.7821766743321	19.3198346223521	0
76.6006572533024	76.3622190501377	75.5908317228023	74.1669871778972	71.8379096372821	68.0879531172694	61.7704320516201	49.787865534251	19.3307194252666	0
76.6029633662089	76.3645523236515	75.5932517506163	74.1695684123955	71.8407585608469	68.091244241303	61.7745025141246	49.7935539085665	19.3416026896446	0
76.6052693052381	76.3668854254247	75.5956716073657	74.1721494727335	71.8436072989126	68.0945351511098	61.7785726927128	49.7992417972233	19.3524844155225	0
76.6075750705763	76.3692183556298	75.5980912931979	74.1747303590233	71.8464558515479	68.0978258467113	61.7826425873606	49.8049292001667	19.3633646029379	0
76.6098806624091	76.3715511144386	75.6005108082597	74.1773110713762	71.8493042188211	68.101116328129	61.7867121980438	49.8106161173423	19.3742432519298	0
76.6121860809215	76.3738837020225	75.6029301526974	74.1798916099032	71.8521524008001	68.1044065953839	61.7907815247384	49.8163025486963	19.3851203625381	0
76.6144913262982	76.3762161185521	75.6053493266566	74.1824719747148	71.8550003975523	68.1076966484973	61.7948505674206	49.8219884941752	19.3959959348039	0
76.6167963987228	76.3785483641975	75.6077683302826	74.1850521659209	71.8578482091452	68.1109864874901	61.7989193260667	49.8276739537257	19.4068699687698	0
76.6191012983787	76.3808804391282	75.6101871637198	74.1876321836311	71.8606958356455	68.114276112383	61.8029878006528	49.8333589272954	19.4177424644791	0
76.6214060254485	76.3832123435132	75.6126058271122	74.1902120279543	71.8635432771199	68.1175655231968	61.8070559911556	49.8390434148318	19.4286134219766	0
76.6237105801142	76.3855440775206	75.6150243206034	74.1927916989992	71.8663905336345	68.120854719952	61.8111238975516	49.8447274162832	19.4394828413081	0
76.6260149625573	76.3878756413182	75.6174426443362	74.1953711968737	71.8692376052553	68.124143702669	61.8151915198173	49.850410931598	19.4503507225207	0
76.6283191729586	76.3902070350732	75.6198607984529	74.1979505216856	71.8720844920479	68.1274324713682	61.8192588579297	49.8560939607253	19.4612170656624	0
76.6306232114983	76.392538258952	75.6222787830953	74.2005296735418	71.8749311940775	68.1307210260696	61.8233259118655	49.8617765036144	19.4720818707827	0
76.6329270783561	76.3948693131207	75.6246965984047	74.2031086525491	71.877777711409	68.1340093667934	61.8273926816019	49.867458560215	19.4829451379318	0
76.635230773711	76.3972001977445	75.6271142445216	74.2056874588138	71.8806240441071	68.1372974935595	61.8314591671158	49.8731401304774	19.4938068671613	0
76.6375342977414	76.3995309129883	75.6295317215863	74.2082660924414	71.8834701922361	68.1405854063876	61.8355253683845	49.878821214352	19.5046670585239	0
76.6398376506251	76.4018614590162	75.6319490297384	74.2108445535373	71.88631615586	68.1438731052974	61.8395912853853	49.8845018117898	19.5155257120733	0
76.6421408325395	76.4041918359918	75.6343661691168	74.2134228422064	71.8891619350424	68.1471605903085	61.8436569180957	49.8901819227422	19.5263828278645	0
76.6444438436611	76.4065220440781	75.6367831398601	74.216000958553	71.8920075298466	68.1504478614402	61.8477222664931	49.8958615471608	19.5372384059534	0
76.646746684166	76.4088520834376	75.6391999421062	74.2185789026809	71.8948529403358	68.153734918712	61.8517873305552	49.9015406849979	19.5480924463971	0
76.6490493542296	76.4111819542322	75.6416165759925	74.2211566746937	71.8976981665726	68.1570217621429	61.8558521102598	49.9072193362059	19.5589449492539	0
76.6513518540269	76.413511656623	75.6440330416559	74.2237342746944	71.9005432086196	68.1603083917522	61.8599166055848	49.9128975007377	19.5697959145828	0
76.653654183732	76.415841190771	75.6464493392329	74.2263117027856	71.9033880665387	68.1635948075586	61.863980816508	49.9185751785466	19.5806453424444	0
76.6559563435186	76.418170556836	75.6488654688591	74.2288889590693	71.9062327403919	68.1668810095811	61.8680447430076	49.9242523695863	19.5914932329	0
76.6582583335598	76.4204997549778	75.6512814306698	74.2314660436473	71.9090772302407	68.1701669978384	61.8721083850617	49.9299290738108	19.6023395860121	0
76.6605601540282	76.4228287853552	75.6536972247999	74.2340429566207	71.9119215361462	68.1734527723491	61.8761717426487	49.9356052911746	19.6131844018443	0
76.6628618050955	76.4251576481268	75.6561128513835	74.2366196980905	71.9147656581695	68.1767383331317	61.8802348157469	49.9412810216325	19.6240276804612	0
76.6651632869332	76.4274863434503	75.6585283105543	74.2391962681569	71.9176095963712	68.1800236802046	61.8842976043349	49.9469562651396	19.6348694219284	0
76.6674645997118	76.429814871483	75.6609436024456	74.2417726669199	71.9204533508115	68.1833088135861	61.8883601083911	49.9526310216515	19.6457096263127	0
76.6697657436017	76.4321432323816	75.6633587271899	74.2443488944789	71.9232969215506	68.1865937332944	61.8924223278945	49.9583052911242	19.6565482936819	0
76.6720667187723	76.4344714263022	75.6657736849195	74.2469249509332	71.9261403086482	68.1898784393475	61.8964842628237	49.9639790735139	19.6673854241047	0
76.6743675253926	76.4367994534005	75.6681884757658	74.2495008363813	71.9289835121638	68.1931629317635	61.9005459131577	49.9696523687773	19.678221017651	0
76.676668163631	76.4391273138314	75.6706030998602	74.2520765509214	71.9318265321566	68.1964472105601	61.9046072788755	49.9753251768715	19.6890550743916	0
76.6789686336552	76.4414550077495	75.673017557333	74.2546520946513	71.9346693686855	68.1997312757552	61.9086683599564	49.9809974977538	19.6998875943985	0
76.6812689356326	76.4437825353084	75.6754318483145	74.2572274676685	71.937512021809	68.2030151273663	61.9127291563794	49.986669331382	19.7107185777445	0
76.6835690697297	76.4461098966617	75.6778459729341	74.2598026700698	71.9403544915856	68.2062987654111	61.9167896681241	49.9923406777143	19.7215480245035	0
76.6858690361126	76.4484370919621	75.6802599313209	74.2623777019518	71.9431967780733	68.2095821899069	61.9208498951697	49.9980115367092	19.7323759347505	0
76.6881688349468	76.4507641213617	75.6826737236035	74.2649525634106	71.9460388813299	68.2128654008711	61.924909837496	50.0036819083254	19.7432023085614	0
76.6904684663972	76.4530909850123	75.68508734991	74.2675272545419	71.9488808014129	68.216148398321	61.9289694950825	50.0093517925223	19.7540271460132	0
76.6927679306282	76.455417683065	75.6875008103678	74.2701017754411	71.9517225383795	68.2194311822738	61.9330288679091	50.0150211892593	19.7648504471836	0
76.6950672278034	76.4577442156702	75.689914105104	74.272676126203	71.9545640922867	68.2227137527464	61.9370879559556	50.0206900984964	19.7756722121518	0
76.6973663580861	76.4600705829781	75.6923272342451	74.275250306922	71.9574054631911	68.2259961097558	61.941146759202	50.0263585201939	19.7864924409974	0
76.6996653216389	76.4623967851381	75.6947401979173	74.2778243176924	71.9602466511493	68.2292782533188	61.9452052776283	50.0320264543124	19.7973111338015	0
76.7019641186238	76.464722822299	75.6971529962459	74.2803981586077	71.9630876562174	68.2325601834524	61.9492635112149	50.0376939008128	19.8081282906458	0
76.7042627492023	76.4670486946093	75.6995656293562	74.2829718297611	71.9659284784512	68.235841900173	61.9533214599419	50.0433608596566	19.8189439116131	0
76.7065612135352	76.4693744022167	75.7019780973726	74.2855453312457	71.9687691179063	68.2391234034973	61.9573791237897	50.0490273308053	19.8297579967872	0
76.7088595117831	76.4716999452686	75.7043904004193	74.2881186631538	71.9716095746382	68.2424046934418	61.961436502739	50.0546933142209	19.8405705462529	0
76.7111576441054	76.4740253239116	75.7068025386197	74.2906918255776	71.974449848702	68.2456857700228	61.9654935967702	50.0603588098659	19.8513815600959	0
76.7134556106616	76.476350538292	75.7092145120971	74.2932648186086	71.9772899401524	68.2489666332567	61.969550405864	50.066023817703	19.8621910384027	0
76.7157534116102	76.4786755885554	75.7116263209739	74.2958376423383	71.9801298490441	68.2522472831597	61.9736069300014	50.0716883376951	19.8729989812609	0
76.7180510471093	76.481000474847	75.7140379653724	74.2984102968574	71.9829695754313	68.2555277197478	61.9776631691632	50.0773523698056	19.8838053887591	0
76.7203485173164	76.4833251973112	75.7164494454141	74.3009827822565	71.9858091193683	68.2588079430371	61.9817191233304	50.0830159139984	19.8946102609867	0
76.7226458223885	76.4856497560922	75.7188607612203	74.3035550986258	71.9886484809087	68.2620879530436	61.9857747924841	50.0886789702373	19.9054135980341	0
76.7249429624819	76.4879741513335	75.7212719129117	74.3061272460549	71.9914876601061	68.2653677497831	61.9898301766057	50.0943415384869	19.9162153999926	0
76.7272399377525	76.490298383178	75.7236829006083	74.3086992246332	71.994326657014	68.2686473332714	61.9938852756762	50.1000036187117	19.9270156669545	0
76.7295367483556	76.4926224517682	75.72609372443	74.3112710344498	71.9971654716852	68.2719267035242	61.9979400896774	50.105665210877	19.9378143990129	0
76.7318333944459	76.494946357246	75.7285043844961	74.313842675593	72.0000041041727	68.275205860557	62.0019946185905	50.111326314948	19.9486115962618	0
76.7341298761775	76.4972700997528	75.7309148809252	74.3164141481513	72.002842554529	68.2784848043854	62.0060488623973	50.1169869308905	19.9594072587962	0
76.7364261937041	76.4995936794295	75.7333252138358	74.3189854522124	72.0056808228065	68.2817635350248	62.0101028210795	50.1226470586705	19.9702013867121	0
76.7387223471787	76.5019170964165	75.7357353833457	74.3215565878638	72.0085189090571	68.2850420524906	62.0141564946189	50.1283066982543	19.9809939801062	0
76.7410183367539	76.5042403508535	75.7381453895723	74.3241275551925	72.0113568133329	68.288320356798	62.0182098829975	50.1339658496088	19.9917850390761	0
76.7433141625816	76.5065634428799	75.7405552326324	74.3266983542854	72.0141945356853	68.2915984479622	62.0222629861973	50.1396245127007	20.0025745637204	0
76.7456098248132	76.5088863726343	75.7429649126426	74.3292689852287	72.0170320761657	68.2948763259984	62.0263158042004	50.1452826874976	20.0133625541386	0
76.7479053235996	76.5112091402552	75.7453744297189	74.3318394481084	72.0198694348253	68.2981539909215	62.030368336989	50.150940373967	20.024149010431	0
76.7502006590911	76.5135317458802	75.7477837839767	74.3344097430102	72.022706611715	68.3014314427465	62.0344205845456	50.1565975720769	20.0349339326989	0
76.7524958314376	76.5158541896467	75.7501929755312	74.3369798700192	72.0255436068853	68.3047086814882	62.0384725468524	50.1622542817956	20.0457173210442	0
76.7547908407881	76.5181764716912	75.752602004497	74.3395498292204	72.0283804203867	68.3079857071615	62.0425242238921	50.1679105030917	20.05649917557	0
76.7570856872916	76.52049859215	75.7550108709883	74.3421196206983	72.0312170522695	68.3112625197811	62.0465756156472	50.1735662359341	20.06727949638	0
76.759380371096	76.5228205511588	75.7574195751187	74.3446892445371	72.0340535025834	68.3145391193616	62.0506267221005	50.1792214802921	20.078058283579	0
76.7616748923491	76.5251423488528	75.7598281170016	74.3472587008205	72.0368897713784	68.3178155059176	62.0546775432349	50.1848762361351	20.0888355372726	0
76.7639692511978	76.5274639853667	75.7622364967497	74.3498279896321	72.0397258587038	68.3210916794635	62.0587280790332	50.190530503433	20.0996112575669	0
76.7662634477889	76.5297854608346	75.7646447144754	74.3523971110549	72.0425617646089	68.3243676400138	62.0627783294785	50.196184282156	20.1103854445695	0
76.7685574822682	76.5321067753902	75.7670527702907	74.3549660651717	72.0453974891428	68.3276433875828	62.0668282945539	50.2018375722746	20.1211580983882	0
76.7708513547812	76.5344279291667	75.769460664307	74.3575348520648	72.0482330323543	68.3309189221848	62.0708779742426	50.2074903737595	20.1319292191321	0
76.7731450654729	76.5367489222967	75.7718683966354	74.3601034718164	72.051068394292	68.3341942438339	62.0749273685279	50.2131426865817	20.1426988069109	0
76.7754386144877	76.5390697549124	75.7742759673864	74.362671924508	72.0539035750042	68.3374693525443	62.0789764773933	50.2187945107127	20.1534668618351	0
76.7777320019696	76.5413904271455	75.7766833766702	74.3652402102211	72.0567385745391	68.34074424833	62.0830253008222	50.2244458461242	20.1642333840163	0
76.7800252280618	76.5437109391271	75.7790906245966	74.3678083290366	72.0595733929447	68.3440189312051	62.0870738387983	50.2300966927881	20.1749983735667	0
76.7823182929072	76.5460312909879	75.7814977112747	74.3703762810353	72.0624080302685	68.3472934011834	62.0911220913052	50.2357470506767	20.1857618305993	0
76.7846111966481	76.5483514828581	75.7839046368135	74.3729440662974	72.0652424865582	68.3505676582787	62.0951700583268	50.2413969197625	20.1965237552281	0
76.7869039394264	76.5506715148674	75.7863114013214	74.3755116849029	72.068076761861	68.3538417025049	62.0992177398469	50.2470463000186	20.2072841475677	0
76.7891965213832	76.5529913871449	75.7887180049063	74.3780791369315	72.0709108562239	68.3571155338756	62.1032651358497	50.2526951914179	20.2180430077336	0
76.7914889426593	76.5553110998194	75.7911244476758	74.3806464224624	72.0737447696939	68.3603891524044	62.107312246319	50.258343593934	20.2288003358422	0
76.7937812033949	76.5576306530191	75.7935307297369	74.3832135415746	72.0765785023175	68.363662558105	62.1113590712391	50.2639915075407	20.2395561320106	0
76.7960733037298	76.5599500468717	75.7959368511966	74.3857804943468	72.0794120541411	68.3669357509908	62.1154056105944	50.2696389322119	20.2503103963566	0
76.7983652438032	76.5622692815044	75.7983428121608	74.3883472808573	72.082245425211	68.3702087310753	62.119451864369	50.2752858679221	20.2610631289991	0
76.8006570237537	76.5645883570441	75.8007486127356	74.3909139011839	72.0850786155732	68.3734814983718	62.1234978325477	50.2809323146458	20.2718143300575	0
76.8029486437195	76.5669072736169	75.8031542530264	74.3934803554044	72.0879116252735	68.3767540528936	62.1275435151148	50.286578272358	20.2825639996521	0
76.8052401038382	76.5692260313488	75.8055597331381	74.3960466435961	72.0907444543574	68.3800263946539	62.1315889120551	50.2922237410338	20.2933121379039	0
76.807531404247	76.571544630365	75.8079650531754	74.3986127658359	72.0935771028703	68.383298523666	62.1356340233532	50.2978687206488	20.3040587449348	0
76.8098225450825	76.5738630707903	75.8103702132423	74.4011787222005	72.0964095708574	68.386570439943	62.1396788489941	50.3035132111787	20.3148038208675	0
76.8121135264809	76.5761813527491	75.8127752134427	74.4037445127662	72.0992418583637	68.3898421434978	62.1437233889627	50.3091572125995	20.3255473658253	0
76.8144043485777	76.5784994763654	75.81518005388	74.4063101376091	72.1020739654339	68.3931136343435	62.1477676432439	50.3148007248876	20.3362893799324	0
76.8166950115081	76.5808174417625	75.8175847346569	74.4088755968048	72.1049058921126	68.3963849124929	62.151811611823	50.3204437480197	20.3470298633137	0
76.8189855154068	76.5831352490634	75.8199892558761	74.4114408904288	72.1077376384442	68.3996559779591	62.155855294685	50.3260862819725	20.3577688160949	0
76.8212758604077	76.5854528983906	75.8223936176397	74.414006018556	72.1105692044728	68.4029268307547	62.1598986918155	50.3317283267233	20.3685062384025	0
76.8235660466445	76.587770389866	75.8247978200493	74.4165709812611	72.1134005902424	68.4061974708924	62.1639418031996	50.3373698822495	20.3792421303637	0
76.8258560742503	76.5900877236112	75.8272018632062	74.4191357786187	72.1162317957968	68.409467898385	62.167984628823	50.3430109485288	20.3899764921063	0
76.8281459433578	76.5924048997473	75.8296057472114	74.4217004107028	72.1190628211795	68.4127381132451	62.1720271686711	50.3486515255392	20.4007093237591	0
76.830435654099	76.5947219183949	75.8320094721652	74.4242648775871	72.1218936664339	68.4160081154852	62.1760694227298	50.354291613259	20.4114406254516	0
76.8327252066056	76.5970387796742	75.8344130381679	74.4268291793453	72.1247243316033	68.4192779051178	62.1801113909846	50.3599312116667	20.4221703973139	0
76.8350146010087	76.5993554837048	75.836816445319	74.4293933160504	72.1275548167305	68.4225474821554	62.1841530734216	50.3655703207412	20.432898639477	0
76.8373038374389	76.6016720306059	75.8392196937179	74.4319572877753	72.1303851218584	68.4258168466104	62.1881944700265	50.3712089404614	20.4436253520724	0
76.8395929160264	76.6039884204964	75.8416227834634	74.4345210945926	72.1332152470296	68.429085998495	62.1922355807855	50.3768470708068	20.4543505352326	0
76.8418818369008	76.6063046534945	75.8440257146541	74.4370847365745	72.1360451922865	68.4323549378216	62.1962764056847	50.382484711757	20.4650741890906	0
76.8441706001913	76.6086207297181	75.846428487388	74.439648213793	72.1388749576714	68.4356236646023	62.2003169447103	50.3881218632918	20.4757963137804	0
76.8464592060266	76.6109366492847	75.8488311017628	74.4422115263197	72.1417045432262	68.4388921788494	62.2043571978486	50.3937585253913	20.4865169094363	0
76.8487476545349	76.613252412311	75.8512335578758	74.4447746742259	72.1445339489928	68.4421604805748	62.2083971650859	50.3993946980361	20.4972359761938	0
76.8510359458438	76.6155680189138	75.853635855824	74.4473376575827	72.1473631750129	68.4454285697907	62.2124368464089	50.4050303812067	20.5079535141887	0
76.8533240800808	76.617883469209	75.8560379957039	74.4499004764609	72.150192221328	68.4486964465091	62.2164762418039	50.4106655748841	20.5186695235578	0
76.8556120573723	76.6201987633121	75.8584399776116	74.4524631309308	72.1530210879793	68.4519641107418	62.2205153512578	50.4163002790495	20.5293840044385	0
76.8578998778449	76.6225139013385	75.8608418016429	74.4550256210625	72.155849775008	68.4552315625008	62.2245541747572	50.4219344936843	20.5400969569687	0
76.8601875416241	76.6248288834028	75.8632434678931	74.4575879469261	72.158678282455	68.4584988017979	62.2285927122889	50.4275682187701	20.5508083812874	0
76.8624750488355	76.6271437096192	75.8656449764573	74.4601501085909	72.161506610361	68.4617658286448	62.2326309638399	50.4332014542891	20.5615182775339	0
76.8647623996037	76.6294583801016	75.8680463274301	74.4627121061264	72.1643347587666	68.4650326430533	62.2366689293973	50.4388342002234	20.5722266458486	0
76.8670495940533	76.6317728949633	75.8704475209057	74.4652739396014	72.1671627277122	68.4682992450351	62.240706608948	50.4444664565555	20.5829334863722	0
76.869336632308	76.6340872543174	75.8728485569779	74.4678356090846	72.169990517238	68.4715656346017	62.2447440024792	50.450098223268	20.5936387992462	0
76.8716235144914	76.6364014582764	75.8752494357402	74.4703971146444	72.172818127384	68.4748318117648	62.2487811099783	50.455729500344	20.6043425846131	0
76.8739102407263	76.6387155069523	75.8776501572858	74.472958456349	72.1756455581901	68.4780977765358	62.2528179314326	50.4613602877668	20.6150448426155	0
76.8761968111353	76.6410294004567	75.8800507217074	74.4755196342661	72.1784728096959	68.4813635289262	62.2568544668295	50.4669905855197	20.6257455733972	0
76.8784832258403	76.6433431389008	75.8824511290972	74.4780806484632	72.181299881941	68.4846290689474	62.2608907161566	50.4726203935865	20.6364447771024	0
76.8807694849631	76.6456567223955	75.8848513795474	74.4806414990078	72.1841267749646	68.4878943966108	62.2649266794014	50.4782497119511	20.647142453876	0
76.8830555886246	76.6479701510511	75.8872514731494	74.4832021859666	72.186953488806	68.4911595119277	62.2689623565517	50.4838785405979	20.6578386038637	0
76.8853415369455	76.6502834249775	75.8896514099946	74.4857627094063	72.189780023504	68.4944244149094	62.2729977475952	50.4895068795113	20.6685332272117	0
76.887627330046	76.6525965442842	75.8920511901738	74.4883230693935	72.1926063790976	68.497689105567	62.2770328525198	50.4951347286759	20.6792263240669	0
76.8899129680458	76.6549095090802	75.8944508137776	74.4908832659942	72.1954325556253	68.5009535839117	62.2810676713135	50.5007620880767	20.6899178945769	0
76.8921984510641	76.6572223194742	75.896850280896	74.4934432992742	72.1982585531256	68.5042178499547	62.2851022039643	50.506388957699	20.70060793889	0
76.8944837792198	76.6595349755745	75.8992495916189	74.4960031692991	72.2010843716368	68.507481903707	62.2891364504602	50.5120153375282	20.7112964571551	0
76.8967689526313	76.6618474774887	75.9016487460357	74.4985628761343	72.203910011197	68.5107457451797	62.2931704107896	50.5176412275499	20.7219834495216	0
76.8990539714163	76.6641598253243	75.9040477442355	74.5011224198447	72.2067354718442	68.5140093743837	62.2972040849406	50.52326662775	20.7326689161398	0
76.9013388356925	76.6664720191882	75.9064465863069	74.5036818004951	72.2095607536162	68.5172727913299	62.3012374729017	50.5288915381148	20.7433528571606	0
76.9036235455766	76.6687840591871	75.9088452723383	74.50624101815	72.2123858565506	68.5205359960292	62.3052705746613	50.5345159586306	20.7540352727353	0
76.9059081011855	76.6710959454269	75.9112438024177	74.5088000728735	72.2152107806849	68.5237989884925	62.3093033902079	50.540139889284	20.7647161630161	0
76.908192502635	76.6734076780134	75.9136421766328	74.5113589647297	72.2180355260564	68.5270617687305	62.3133359195302	50.545763330062	20.7753955281557	0
76.9104767500409	76.6757192570519	75.9160403950708	74.5139176937821	72.2208600927021	68.530324336754	62.3173681626168	50.5513862809515	20.7860733683075	0
76.9127608435184	76.6780306826473	75.9184384578186	74.5164762600942	72.2236844806591	68.5335866925737	62.3214001194566	50.5570087419401	20.7967496836255	0
76.9150447831822	76.680341954904	75.9208363649628	74.5190346637291	72.2265086899642	68.5368488362003	62.3254317900383	50.5626307130151	20.8074244742644	0
76.9173285691468	76.6826530739262	75.9232341165897	74.5215929047497	72.2293327206541	68.5401107676443	62.3294631743509	50.5682521941644	20.8180977403793	0
76.9196122015259	76.6849640398174	75.9256317127852	74.5241509832186	72.2321565727651	68.5433724869162	62.3334942723835	50.573873185376	20.8287694821261	0
76.921895680433	76.6872748526809	75.9280291536347	74.5267088991982	72.2349802463338	68.5466339940267	62.3375250841252	50.5794936866382	20.8394396996614	0
76.9241790059812	76.6895855126197	75.9304264392235	74.5292666527504	72.2378037413961	68.5498952889862	62.3415556095651	50.5851136979395	20.8501083931421	0
76.926462178283	76.691896019736	75.9328235696364	74.5318242439372	72.2406270579882	68.5531563718052	62.3455858486925	50.5907332192686	20.8607755627261	0
76.9287451974505	76.694206374132	75.9352205449579	74.53438167282	72.2434501961459	68.5564172424939	62.3496158014967	50.5963522506143	20.8714412085716	0
76.9310280635955	76.6965165759093	75.9376173652722	74.5369389394603	72.2462731559048	68.5596779010629	62.3536454679672	50.601970791966	20.8821053308376	0
76.9333107768292	76.6988266251691	75.9400140306631	74.539496043919	72.2490959373006	68.5629383475223	62.3576748480934	50.6075888433129	20.8927679296835	0
76.9355933372625	76.7011365220123	75.9424105412142	74.542052986257	72.2519185403686	68.5661985818824	62.361703941865	50.6132064046447	20.9034290052696	0
76.9378757450059	76.7034462665394	75.9448068970084	74.5446097665347	72.2547409651441	68.5694586041535	62.3657327492716	50.6188234759512	20.9140885577564	0
76.9401580001692	76.7057558588503	75.9472030981287	74.5471663848124	72.2575632116621	68.5727184143457	62.369761270303	50.6244400572224	20.9247465873054	0
76.9424401028621	76.7080652990448	75.9495991446575	74.5497228411503	72.2603852799575	68.5759780124691	62.3737895049489	50.6300561484487	20.9354030940784	0
76.9447220531937	76.710374587222	75.9519950366769	74.5522791356079	72.2632071700652	68.579237398534	62.3778174531992	50.6356717496205	20.946058078238	0
76.9470038512727	76.712683723481	75.9543907742689	74.554835268245	72.2660288820198	68.5824965725502	62.381845115044	50.6412868607285	20.9567115399471	0
76.9492854972075	76.7149927079202	75.9567863575148	74.5573912391208	72.2688504158557	68.5857555345279	62.3858724904733	50.6469014817638	20.9673634793695	0
76.9515669911058	76.7173015406376	75.9591817864958	74.5599470482942	72.2716717716073	68.589014284477	62.3898995794772	50.6525156127173	20.9780138966695	0
76.9538483330752	76.719610221731	75.9615770612927	74.5625026958241	72.2744929493087	68.5922728224074	62.3939263820459	50.6581292535805	20.9886627920117	0
76.9561295232227	76.7219187512977	75.963972181986	74.5650581817689	72.277313948994	68.595531148329	62.3979528981697	50.6637424043449	20.9993101655617	0
76.9584105616549	76.7242271294347	75.9663671486559	74.5676135061871	72.280134770697	68.5987892622518	62.4019791278389	50.6693550650024	21.0099560174853	0
76.960691448478	76.7265353562385	75.9687619613822	74.5701686691366	72.2829554144515	68.6020471641854	62.4060050710441	50.6749672355449	21.0206003479492	0
76.9629721837979	76.7288434318053	75.9711566202445	74.5727236706752	72.2857758802911	68.6053048541398	62.4100307277756	50.6805789159647	21.0312431571204	0
76.9652527677199	76.7311513562309	75.9735511253219	74.5752785108606	72.2885961682492	68.6085623321245	62.4140560980241	50.6861901062542	21.0418844451667	0
76.967533200349	76.7334591296107	75.9759454766933	74.5778331897499	72.2914162783591	68.6118195981494	62.4180811817803	50.691800806406	21.0525242122561	0
76.9698134817897	76.7357667520398	75.9783396744373	74.5803877074004	72.294236210654	68.615076652224	62.4221059790349	50.6974110164129	21.0631624585576	0
76.9720936121462	76.7380742236128	75.980733718632	74.5829420638687	72.2970559651668	68.618333494358	62.4261304897786	50.7030207362681	21.0737991842404	0
76.9743735915223	76.740381544424	75.9831276093555	74.5854962592116	72.2998755419304	68.6215901245611	62.4301547140024	50.7086299659648	21.0844343894746	0
76.9766534200213	76.7426887145674	75.9855213466853	74.5880502934854	72.3026949409777	68.6248465428426	62.4341786516973	50.7142387054964	21.0950680744304	0
76.9789330977461	76.7449957341365	75.9879149306988	74.5906041667461	72.305514162341	68.6281027492122	62.4382023028543	50.7198469548566	21.105700239279	0
76.9812126247993	76.7473026032245	75.9903083614728	74.5931578790498	72.308333206053	68.6313587436794	62.4422256674644	50.7254547140394	21.1163308841919	0
76.9834920012831	76.7496093219241	75.992701639084	74.5957114304521	72.3111520721458	68.6346145262535	62.446248745519	50.7310619830388	21.1269600093411	0
76.9857712272991	76.7519158903279	75.9950947636089	74.5982648210083	72.3139707606517	68.6378700969439	62.4502715370091	50.736668761849	21.1375876148994	0
76.9880503029487	76.7542223085279	75.9974877351234	74.6008180507738	72.3167892716026	68.6411254557601	62.4542940419263	50.7422750504646	21.1482137010398	0
76.9903292283329	76.7565285766158	75.9998805537032	74.6033711198033	72.3196076050305	68.6443806027114	62.4583162602617	50.7478808488802	21.1588382679361	0
76.9926080035522	76.7588346946829	76.0022732194239	74.6059240281517	72.3224257609672	68.647635537807	62.4623381920071	50.7534861570908	21.1694613157626	0
76.9948866287067	76.7611406628203	76.0046657323605	74.6084767758736	72.3252437394441	68.6508902610562	62.4663598371538	50.7590909750915	21.180082844694	0
76.9971651038963	76.7634464811185	76.0070580925877	74.611029363023	72.3280615404928	68.6541447724682	62.4703811956935	50.7646953028774	21.1907028549056	0
76.9994434292203	76.7657521496679	76.0094503001802	74.6135817896541	72.3308791641447	68.6573990720523	62.474402267618	50.7702991404442	21.2013213465733	0
77.0017216047777	76.7680576685583	76.0118423552122	74.6161340558208	72.3336966104309	68.6606531598176	62.4784230529189	50.7759024877874	21.2119383198734	0
77.003999630667	76.7703630378792	76.0142342577575	74.6186861615765	72.3365138793825	68.6639070357731	62.4824435515881	50.7815053449031	21.2225537749828	0
77.0062775069865	76.7726682577199	76.0166260078897	74.6212381069747	72.3393309710305	68.667160699928	62.4864637636175	50.7871077117872	21.2331677120788	0
77.008555233834	76.7749733281692	76.0190176056821	74.6237898920686	72.3421478854056	68.6704141522914	62.4904836889991	50.792709588436	21.2437801313395	0
77.010832811307	76.7772782493156	76.0214090512078	74.6263415169109	72.3449646225385	68.6736673928722	62.494503327725	50.798310974846	21.2543910329432	0
77.0131102395024	76.7795830212472	76.0238003445395	74.6288929815545	72.3477811824598	68.6769204216795	62.4985226797872	50.8039118710138	21.265000417069	0
77.015387518517	76.7818876440517	76.0261914857495	74.6314442860518	72.3505975651998	68.6801732387221	62.5025417451779	50.8095122769364	21.2756082838961	0
77.0176646484471	76.7841921178166	76.02858247491	74.6339954304551	72.353413770789	68.683425844009	62.5065605238895	50.8151121926106	21.2862146336047	0
77.0199416293885	76.7864964426291	76.0309733120928	74.6365464148164	72.3562297992573	68.6866782375491	62.5105790159142	50.8207116180338	21.2968194663751	0
77.0222184614368	76.7888006185757	76.0333639973694	74.6390972391875	72.3590456506348	68.6899304193512	62.5145972212444	50.8263105532034	21.3074227823883	0
77.0244951446872	76.7911046457429	76.035754530811	74.6416479036201	72.3618613249514	68.6931823894242	62.5186151398727	50.831908998117	21.3180245818259	0
77.0267716792344	76.7934085242168	76.0381449124887	74.6441984081656	72.3646768222369	68.6964341477768	62.5226327717915	50.8375069527724	21.3286248648698	0
77.0290480651729	76.795712254083	76.040535142473	74.646748752875	72.3674921425209	68.6996856944178	62.5266501169934	50.8431044171675	21.3392236317023	0
77.0313243025966	76.7980158354269	76.0429252208344	74.6492989377994	72.3703072858329	68.7029370293559	62.5306671754711	50.8487013913006	21.3498208825066	0
77.0336003915993	76.8003192683335	76.045315147643	74.6518489629895	72.3731222522023	68.7061881525998	62.5346839472175	50.85429787517	21.3604166174661	0
77.0358763322742	76.8026225528875	76.0477049229684	74.6543988284959	72.3759370416583	68.7094390641581	62.5387004322251	50.8598938687742	21.3710108367646	0
77.0381521247142	76.8049256891732	76.0500945468802	74.6569485343688	72.3787516542301	68.7126897640395	62.5427166304871	50.865489372112	21.3816035405867	0
77.040427769012	76.8072286772746	76.0524840194477	74.6594980806584	72.3815660899467	68.7159402522527	62.5467325419963	50.8710843851822	21.3921947291172	0
77.0427032652596	76.8095315172753	76.0548733407398	74.6620474674146	72.384380348837	68.719190528806	62.5507481667456	50.876678907984	21.4027844025415	0
77.044978613549	76.8118342092588	76.0572625108252	74.6645966946871	72.3871944309296	68.7224405937081	62.5547635047283	50.8822729405166	21.4133725610455	0
77.0472538139716	76.814136753308	76.0596515297722	74.6671457625253	72.3900083362533	68.7256904469675	62.5587785559374	50.8878664827796	21.4239592048156	0
77.0495288666185	76.8164391495055	76.062040397649	74.6696946709785	72.3928220648366	68.7289400885927	62.5627933203662	50.8934595347724	21.4345443340386	0
77.0518037715805	76.8187413979337	76.0644291145234	74.6722434200959	72.3956356167078	68.732189518592	62.5668077980079	50.8990520964949	21.4451279489018	0
77.0540785289478	76.8210434986746	76.0668176804628	74.6747920099262	72.3984489918952	68.7354387369739	62.5708219888559	50.9046441679472	21.4557100495929	0
77.0563531388106	76.8233454518098	76.0692060955347	74.6773404405181	72.401262190427	68.7386877437468	62.5748358929036	50.9102357491294	21.4662906363003	0
77.0586276012585	76.8256472574208	76.071594359806	74.6798887119201	72.4040752123312	68.741936538919	62.5788495101445	50.9158268400418	21.4768697092125	0
77.0609019163808	76.8279489155884	76.0739824733434	74.6824368241805	72.4068880576357	68.7451851224989	62.5828628405721	50.9214174406849	21.4874472685189	0
77.0631760842664	76.8302504263935	76.0763704362134	74.6849847773472	72.4097007263683	68.7484334944947	62.58687588418	50.9270075510595	21.498023314409	0
77.065450105004	76.8325517899163	76.078758248482	74.6875325714681	72.4125132185567	68.7516816549148	62.5908886409619	50.9325971711664	21.5085978470729	0
77.0677239786819	76.834853006237	76.0811459102154	74.690080206591	72.4153255342283	68.7549296037673	62.5949011109116	50.9381863010067	21.5191708667013	0
77.0699977053878	76.8371540754351	76.0835334214791	74.6926276827631	72.4181376734107	68.7581773410604	62.5989132940229	50.9437749405816	21.529742373485	0
77.0722712852094	76.8394549975903	76.0859207823384	74.6951750000318	72.4209496361312	68.7614248668024	62.6029251902895	50.9493630898924	21.5403123676157	0
77.0745447182338	76.8417557727815	76.0883079928584	74.6977221584442	72.423761422417	68.7646721810013	62.6069367997055	50.9549507489408	21.5508808492851	0
77.0768180045479	76.8440564010874	76.0906950531041	74.700269158047	72.426573032295	68.7679192836654	62.6109481222649	50.9605379177285	21.5614478186857	0
77.0790911442383	76.8463568825867	76.0930819631399	74.7028159988869	72.4293844657924	68.7711661748026	62.6149591579616	50.9661245962573	21.5720132760104	0
77.0813641373911	76.8486572173572	76.0954687230302	74.7053626810104	72.432195722936	68.7744128544211	62.6189699067899	50.9717107845294	21.5825772214523	0
77.083636984092	76.850957405477	76.097855332839	74.7079092044638	72.4350068037525	68.7776593225288	62.6229803687439	50.977296482547	21.5931396552051	0
77.0859096844266	76.8532574470236	76.1002417926301	74.7104555692931	72.4378177082685	68.7809055791339	62.6269905438179	50.9828816903125	21.6037005774631	0
77.08818223848	76.855557342074	76.102628102467	74.7130017755442	72.4406284365106	68.7841516242442	62.6310004320061	50.9884664078285	21.6142599884208	0
77.090454646337	76.8578570907051	76.105014262413	74.7155478232628	72.4434389885051	68.7873974578678	62.635010033303	50.9940506350978	21.6248178882733	0
77.0927269080821	76.8601566929937	76.107400272531	74.7180937124944	72.4462493642784	68.7906430800125	62.639019347703	50.9996343721231	21.635374277216	0
77.0949990237994	76.8624561490158	76.1097861328838	74.7206394432843	72.4490595638566	68.7938884906863	62.6430283752005	51.0052176189077	21.6459291554449	0
77.0972709935726	76.8647554588475	76.1121718435339	74.7231850156776	72.4518695872657	68.797133689897	62.6470371157902	51.0108003754548	21.6564825231562	0
77.0995428174852	76.8670546225645	76.1145574045434	74.7257304297192	72.4546794345318	68.8003786776525	62.6510455694666	51.0163826417677	21.6670343805467	0
77.1018144956204	76.869353640242	76.1169428159745	74.7282756854539	72.4574891056806	68.8036234539606	62.6550537362245	51.0219644178501	21.6775847278136	0
77.1040860280609	76.8716525119551	76.1193280778887	74.7308207829262	72.460298600738	68.806868018829	62.6590616160586	51.0275457037057	21.6881335651545	0
77.1063574148892	76.8739512377786	76.1217131903476	74.7333657221804	72.4631079197295	68.8101123722656	62.6630692089637	51.0331264993383	21.6986808927676	0
77.1086286561874	76.8762498177868	76.1240981534123	74.7359105032608	72.4659170626806	68.8133565142782	62.6670765149346	51.038706804752	21.7092267108511	0
77.1108997520372	76.878548252054	76.1264829671438	74.7384551262114	72.4687260296168	68.8166004448743	62.6710835339663	51.044286619951	21.7197710196041	0
77.1131707025203	76.8808465406539	76.1288676316028	74.7409995910758	72.4715348205633	68.8198441640617	62.6750902660538	51.0498659449397	21.7303138192258	0
77.1154415077175	76.8831446836601	76.1312521468498	74.7435438978979	72.4743434355454	68.823087671848	62.6790967111921	51.0554447797227	21.7408551099159	0
77.11771216771	76.8854426811458	76.133636512945	74.7460880467209	72.4771518745881	68.826330968241	62.6831028693764	51.0610231243046	21.7513948918745	0
77.119982682578	76.887740533184	76.1360207299483	74.7486320375882	72.4799601377164	68.8295740532481	62.6871087406017	51.0666009786903	21.7619331653023	0
77.1222530524018	76.8900382398473	76.1384047979194	74.7511758705428	72.4827682249552	68.8328169268771	62.6911143248633	51.0721783428847	21.7724699304001	0
77.1245232772612	76.892335801208	76.1407887169179	74.7537195456276	72.4855761363292	68.8360595891354	62.6951196221565	51.0777552168931	21.7830051873694	0
77.1267933572357	76.8946332173383	76.1431724870029	74.7562630628853	72.488383871863	68.8393020400305	62.6991246324767	51.0833316007207	21.7935389364119	0
77.1290632924046	76.8969304883099	76.1455561082334	74.7588064223585	72.4911914315814	68.8425442795701	62.7031293558192	51.0889074943731	21.8040711777297	0
77.1313330828468	76.8992276141943	76.1479395806682	74.7613496240896	72.4939988155086	68.8457863077616	62.7071337921795	51.0944828978558	21.8146019115254	0
77.1336027286408	76.9015245950626	76.1503229043657	74.7638926681206	72.4968060236691	68.8490281246124	62.7111379415531	51.1000578111747	21.8251311380021	0
77.1358722298648	76.9038214309858	76.1527060793842	74.7664355544936	72.4996130560871	68.85226973013	62.7151418039356	51.1056322343356	21.8356588573631	0
77.1381415865968	76.9061181220344	76.1550891057817	74.7689782832504	72.5024199127867	68.8555111243219	62.7191453793227	51.1112061673447	21.8461850698121	0
77.1404107989145	76.9084146682789	76.1574719836161	74.7715208544326	72.505226593792	68.8587523071952	62.7231486677099	51.1167796102082	21.8567097755534	0
77.1426798668951	76.9107110697892	76.1598547129447	74.7740632680818	72.508033099127	68.8619932787576	62.7271516690931	51.1223525629325	21.8672329747914	0
77.1449487906157	76.913007326635	76.162237293825	74.7766055242392	72.5108394288153	68.8652340390163	62.7311543834681	51.1279250255241	21.8777546677312	0
77.147217570153	76.915303438886	76.1646197263139	74.7791476229459	72.5136455828809	68.8684745879785	62.7351568108308	51.1334969979897	21.8882748545782	0
77.1494862055833	76.9175994066111	76.1670020104684	74.781689564243	72.5164515613472	68.8717149256517	62.739158951177	51.1390684803361	21.8987935355379	0
77.1517546969827	76.9198952298795	76.1693841463449	74.7842313481711	72.5192573642379	68.8749550520431	62.7431608045027	51.1446394725704	21.9093107108166	0
77.154023044427	76.9221909087596	76.1717661339999	74.7867729747709	72.5220629915764	68.8781949671599	62.7471623708039	51.1502099746997	21.9198263806207	0
77.1562912479917	76.9244864433199	76.1741479734895	74.7893144440828	72.524868443386	68.8814346710093	62.7511636500769	51.1557799867311	21.9303405451572	0
77.1585593077519	76.9267818336284	76.1765296648696	74.7918557561471	72.5276737196899	68.8846741635986	62.7551646423176	51.1613495086723	21.9408532046333	0
77.1608272237825	76.9290770797528	76.1789112081958	74.7943969110038	72.5304788205114	68.887913444935	62.7591653475223	51.1669185405308	21.9513643592566	0
77.1630949961581	76.9313721817608	76.1812926035237	74.796937908693	72.5332837458733	68.8911525150255	62.7631657656873	51.1724870823141	21.9618740092352	0
77.1653626249528	76.9336671397196	76.1836738509082	74.7994787492543	72.5360884957988	68.8943913738773	62.7671658968089	51.1780551340304	21.9723821547774	0
77.1676301102407	76.9359619536961	76.1860549504046	74.8020194327274	72.5388930703105	68.8976300214976	62.7711657408833	51.1836226956875	21.9828887960921	0
77.1698974520953	76.9382566237571	76.1884359020675	74.8045599591516	72.5416974694313	68.9008684578934	62.7751652979072	51.1891897672935	21.9933939333884	0
77.1721646505902	76.9405511499689	76.1908167059514	74.8071003285663	72.5445016931839	68.9041066830718	62.7791645678768	51.1947563488569	22.0038975668758	0
77.1744317057983	76.9428455323977	76.1931973621106	74.8096405410105	72.5473057415907	68.9073446970398	62.7831635507888	51.2003224403859	22.0143996967641	0
77.1766986177924	76.9451397711094	76.1955778705992	74.8121805965231	72.5501096146742	68.9105824998045	62.7871622466398	51.2058880418893	22.0249003232637	0
77.1789653866449	76.9474338661696	76.1979582314711	74.814720495143	72.5529133124568	68.9138200913728	62.7911606554263	51.2114531533757	22.0353994465851	0
77.1812320124282	76.9497278176437	76.2003384447798	74.8172602369087	72.5557168349608	68.9170574717517	62.7951587771451	51.217017774854	22.0458970669393	0
77.1834984952139	76.9520216255967	76.2027185105789	74.8197998218587	72.5585201822083	68.9202946409482	62.7991566117929	51.2225819063331	22.0563931845377	0
77.1857648350738	76.9543152900935	76.2050984289214	74.8223392500312	72.5613233542214	68.9235315989693	62.8031541593665	51.2281455478223	22.066887799592	0
77.1880310320792	76.9566088111986	76.2074781998603	74.8248785214644	72.5641263510222	68.9267683458217	62.8071514198628	51.2337086993308	22.0773809123142	0
77.190297086301	76.9589021889763	76.2098578234484	74.8274176361961	72.5669291726324	68.9300048815125	62.8111483932786	51.2392713608679	22.0878725229167	0
77.19256299781	76.9611954234906	76.2122372997382	74.8299565942643	72.569731819074	68.9332412060485	62.815145079611	51.2448335324434	22.0983626316123	0
77.1948287666767	76.9634885148053	76.214616628782	74.8324953957065	72.5725342903686	68.9364773194365	62.819141478857	51.2503952140667	22.1088512386141	0
77.1970943929711	76.965781462984	76.2169958106319	74.8350340405602	72.5753365865378	68.9397132216834	62.8231375910135	51.2559564057479	22.1193383441357	0
77.1993598767633	76.9680742680897	76.2193748453397	74.8375725288628	72.5781387076031	68.9429489127959	62.8271334160778	51.2615171074968	22.1298239483907	0
77.2016252181227	76.9703669301856	76.2217537329572	74.8401108606513	72.5809406535861	68.9461843927809	62.8311289540469	51.2670773193235	22.1403080515935	0
77.2038904171186	76.9726594493343	76.2241324735358	74.8426490359629	72.583742424508	68.9494196616451	62.8351242049182	51.2726370412383	22.1507906539585	0
77.2061554738202	76.9749518255983	76.2265110671266	74.8451870548343	72.5865440203902	68.9526547193953	62.8391191686888	51.2781962732515	22.1612717557005	0
77.2084203882961	76.9772440590399	76.2288895137808	74.8477249173022	72.5893454412536	68.9558895660382	62.8431138453562	51.2837550153737	22.1717513570348	0
77.2106851606148	76.979536149721	76.2312678135491	74.8502626234032	72.5921466871196	68.9591242015805	62.8471082349176	51.2893132676154	22.182229458177	0
77.2129497908446	76.9818280977032	76.2336459664821	74.8528001731737	72.5949477580089	68.9623586260288	62.8511023373705	51.2948710299874	22.1927060593429	0
77.2152142790532	76.9841199030481	76.2360239726303	74.8553375666498	72.5977486539426	68.9655928393899	62.8550961527124	51.3004283025006	22.2031811607488	0
77.2174786253084	76.9864115658169	76.2384018320437	74.8578748038678	72.6005493749414	68.9688268416704	62.8590896809408	51.3059850851661	22.2136547626112	0
77.2197428296774	76.9887030860705	76.2407795447724	74.8604118848634	72.6033499210261	68.9720606328769	62.8630829220533	51.311541377995	22.224126865147	0
77.2220068922275	76.9909944638695	76.2431571108661	74.8629488096725	72.6061502922173	68.975294213016	62.8670758760475	51.3170971809986	22.2345974685734	0
77.2242708130254	76.9932856992746	76.2455345303744	74.8654855783306	72.6089504885355	68.9785275820943	62.8710685429211	51.3226524941882	22.2450665731081	0
77.2265345921376	76.9955767923457	76.2479118033465	74.8680221908733	72.6117505100012	68.9817607401184	62.8750609226718	51.3282073175755	22.2555341789689	0
77.2287982296304	76.997867743143	76.2502889298318	74.870558647336	72.6145503566348	68.9849936870947	62.8790530152973	51.3337616511721	22.266000286374	0
77.2310617255699	77.0001585517262	76.252665909879	74.8730949477536	72.6173500284565	68.9882264230299	62.8830448207956	51.3393154949899	22.2764648955421	0
77.2333250800217	77.0024492181546	76.255042743537	74.8756310921613	72.6201495254866	68.9914589479305	62.8870363391645	51.3448688490406	22.2869280066919	0
77.2355882930513	77.0047397424875	76.2574194308542	74.878167080594	72.6229488477452	68.9946912618028	62.8910275704019	51.3504217133365	22.2973896200427	0
77.2378513647239	77.007030124784	76.2597959718791	74.8807029130864	72.6257479952523	68.9979233646534	62.8950185145058	51.3559740878897	22.307849735814	0
77.2401142951044	77.0093203651026	76.2621723666596	74.883238589673	72.6285469680278	69.0011552564888	62.8990091714742	51.3615259727124	22.3183083542257	0
77.2423770842575	77.011610463502	76.2645486152438	74.8857741103882	72.6313457660916	69.0043869373154	62.9029995413052	51.3670773678172	22.3287654754979	0
77.2446397322476	77.0139004200403	76.2669247176794	74.8883094752665	72.6341443894636	69.0076184071395	62.9069896239969	51.3726282732165	22.3392210998511	0
77.2469022391389	77.0161902347756	76.2693006740138	74.8908446843419	72.6369428381633	69.0108496659675	62.9109794195475	51.3781786889231	22.3496752275061	0
77.2491646049951	77.0184799077657	76.2716764842946	74.8933797376484	72.6397411122105	69.014080713806	62.9149689279552	51.3837286149497	22.3601278586841	0
77.25142682988	77.0207694390681	76.2740521485686	74.8959146352199	72.6425392116245	69.0173115506611	62.9189581492182	51.3892780513093	22.3705789936064	0
77.2536889138569	77.0230588287401	76.276427666883	74.8984493770901	72.645337136425	69.0205421765392	62.9229470833349	51.3948269980149	22.3810286324948	0
77.2559508569888	77.0253480768387	76.2788030392845	74.9009839632925	72.6481348866311	69.0237725914467	62.9269357303036	51.4003754550798	22.3914767755714	0
77.2582126593387	77.0276371834208	76.2811782658195	74.9035183938606	72.6509324622623	69.0270027953899	62.9309240901228	51.4059234225171	22.4019234230585	0
77.260474320969	77.029926148543	76.2835533465345	74.9060526688277	72.6537298633377	69.0302327883749	62.9349121627908	51.4114709003403	22.4123685751789	0
77.2627358419422	77.0322149722617	76.2859282814756	74.9085867882268	72.6565270898765	69.0334625704082	62.9388999483062	51.4170178885629	22.4228122321554	0
77.2649972223202	77.0345036546329	76.2883030706887	74.9111207520911	72.6593241418976	69.0366921414959	62.9428874466676	51.4225643871987	22.4332543942113	0
77.267258462165	77.0367921957126	76.2906777142197	74.9136545604534	72.6621210194201	69.0399215016443	62.9468746578735	51.4281103962613	22.4436950615703	0
77.269519561538	77.0390805955564	76.2930522121141	74.9161882133464	72.6649177224628	69.0431506508595	62.9508615819225	51.4336559157646	22.4541342344563	0
77.2717805205006	77.0413688542198	76.2954265644174	74.9187217108026	72.6677142510445	69.0463795891478	62.9548482188135	51.4392009457227	22.4645719130933	0
77.2740413391139	77.043656971758	76.2978007711746	74.9212550528546	72.6705106051839	69.0496083165153	62.9588345685449	51.4447454861496	22.475008097706	0
77.2763020174385	77.045944948226	76.3001748324309	74.9237882395346	72.6733067848997	69.0528368329683	62.9628206311158	51.4502895370597	22.4854427885191	0
77.2785625555352	77.0482327836784	76.3025487482311	74.9263212708749	72.6761027902104	69.0560651385127	62.9668064065249	51.4558330984673	22.4958759857576	0
77.2808229534642	77.05052047817	76.3049225186197	74.9288541469074	72.6788986211346	69.0592932331549	62.970791894771	51.4613761703868	22.506307689647	0
77.2830832112855	77.0528080317548	76.3072961436413	74.931386867664	72.6816942776905	69.0625211169008	62.9747770958531	51.4669187528329	22.5167379004129	0
77.2853433290591	77.0550954444871	76.3096696233401	74.9339194331766	72.6844897598966	69.0657487897565	62.9787620097701	51.4724608458202	22.5271666182813	0
77.2876033068444	77.0573827164206	76.3120429577602	74.9364518434767	72.6872850677711	69.0689762517281	62.9827466365211	51.4780024493636	22.5375938434785	0
77.2898631447008	77.0596698476091	76.3144161469455	74.9389840985958	72.6900802013322	69.0722035028218	62.9867309761051	51.4835435634781	22.5480195762309	0
77.2921228426874	77.0619568381059	76.3167891909397	74.9415161985653	72.6928751605979	69.0754305430434	62.9907150285212	51.4890841881785	22.5584438167654	0
77.294382400863	77.0642436879641	76.3191620897863	74.9440481434165	72.6956699455863	69.0786573723991	62.9946987937684	51.4946243234802	22.5688665653092	0
77.2966418192862	77.0665303972369	76.3215348435287	74.9465799331804	72.6984645563153	69.0818839908947	62.9986822718461	51.5001639693984	22.5792878220895	0
77.2989010980153	77.0688169659768	76.32390745221	74.9491115678879	72.7012589928028	69.0851103985364	63.0026654627535	51.5057031259485	22.5897075873342	0
77.3011602371085	77.0711033942365	76.3262799158732	74.95164304757	72.7040532550666	69.0883365953301	63.0066483664897	51.511241793146	22.6001258612711	0
77.3034192366237	77.0733896820683	76.3286522345612	74.9541743722573	72.7068473431244	69.0915625812817	63.0106309830542	51.5167799710065	22.6105426441286	0
77.3056780966185	77.0756758295242	76.3310244083165	74.9567055419804	72.7096412569939	69.0947883563972	63.0146133124463	51.5223176595457	22.620957936135	0
77.3079368171503	77.0779618366562	76.3333964371815	74.9592365567696	72.7124349966925	69.0980139206825	63.0185953546654	51.5278548587794	22.6313717375194	0
77.3101953982763	77.0802477035159	76.3357683211986	74.9617674166555	72.7152285622378	69.1012392741434	63.0225771097109	51.5333915687236	22.6417840485106	0
77.3124538400534	77.0825334301546	76.3381400604099	74.964298121668	72.7180219536473	69.104464416786	63.0265585775823	51.5389277893944	22.6521948693381	0
77.3147121425382	77.0848190166238	76.3405116548572	74.9668286718373	72.7208151709382	69.107689348616	63.0305397582792	51.5444635208079	22.6626042002315	0
77.3169703057873	77.0871044629744	76.3428831045823	74.9693590671933	72.7236082141278	69.1109140696393	63.0345206518011	51.5499987629803	22.6730120414208	0
77.3192283298569	77.0893897692572	76.3452544096268	74.9718893077658	72.7264010832333	69.1141385798618	63.0385012581476	51.5555335159281	22.683418393136	0
77.321486214803	77.0916749355229	76.347625570032	74.9744193935844	72.7291937782719	69.1173628792892	63.0424815773185	51.5610677796677	22.6938232556076	0
77.3237439606814	77.0939599618217	76.3499965858391	74.9769493246788	72.7319862992607	69.1205869679274	63.0464616093134	51.5666015542158	22.7042266290664	0
77.3260015675475	77.096244848204	76.3523674570892	74.9794791010782	72.7347786462165	69.1238108457822	63.050441354132	51.5721348395889	22.7146285137433	0
77.3282590354567	77.0985295947195	76.3547381838232	74.9820087228121	72.7375708191563	69.1270345128593	63.0544208117742	51.577667635804	22.7250289098696	0
77.330516364464	77.1008142014183	76.3571087660817	74.9845381899095	72.7403628180969	69.1302579691646	63.0583999822398	51.5831999428779	22.7354278176767	0
77.3327735546244	77.1030986683497	76.3594792039053	74.9870675023995	72.7431546430552	69.1334812147037	63.0623788655286	51.5887317608276	22.7458252373965	0
77.3350306059925	77.1053829955631	76.3618494973343	74.9895966603111	72.7459462940477	69.1367042494823	63.0663574616406	51.5942630896703	22.7562211692609	0
77.3372875186225	77.1076671831077	76.3642196464089	74.992125663673	72.7487377710912	69.1399270735063	63.0703357705757	51.5997939294232	22.7666156135024	0
77.3395442925688	77.1099512310325	76.3665896511691	74.9946545125139	72.7515290742021	69.1431496867812	63.0743137923338	51.6053242801036	22.7770085703533	0
77.3418009278853	77.1122351393861	76.3689595116547	74.9971832068624	72.754320203397	69.1463720893129	63.0782915269152	51.610854141729	22.7874000400467	0
77.3440574246257	77.1145189082171	76.3713292279055	74.9997117467468	72.7571111586923	69.1495942811069	63.0822689743197	51.6163835143168	22.7977900228154	0
77.3463137828434	77.1168025375738	76.3736987999609	75.0022401321956	72.7599019401043	69.1528162621689	63.0862461345476	51.6219123978847	22.8081785188929	0
77.3485700025919	77.1190860275044	76.3760682278604	75.0047683632368	72.7626925476494	69.1560380325045	63.0902230075989	51.6274407924505	22.8185655285127	0
77.350826083924	77.1213693780568	76.3784375116429	75.0072964398985	72.7654829813436	69.1592595921194	63.094199593474	51.6329686980319	22.8289510519087	0
77.3530820268928	77.1236525892787	76.3808066513477	75.0098243622087	72.7682732412031	69.1624809410192	63.0981758921729	51.638496114647	22.839335089315	0
77.3553378315508	77.1259356612177	76.3831756470134	75.0123521301952	72.7710633272441	69.1657020792094	63.1021519036961	51.6440230423138	22.8497176409658	0
77.3575934979504	77.128218593921	76.3855444986789	75.0148797438858	72.7738532394825	69.1689230066957	63.1061276280438	51.6495494810503	22.8600987070958	0
77.3598490261437	77.1305013874359	76.3879132063826	75.0174072033079	72.7766429779343	69.1721437234836	63.1101030652163	51.655075430875	22.8704782879398	0
77.3621044161829	77.1327840418092	76.3902817701628	75.0199345084891	72.7794325426153	69.1753642295787	63.1140782152142	51.6606008918059	22.880856383733	0
77.3643596681196	77.1350665570877	76.3926501900578	75.0224616594567	72.7822219335413	69.1785845249864	63.1180530780377	51.6661258638618	22.8912329947105	0
77.3666147820053	77.137348933318	76.3950184661057	75.024988656238	72.7850111507281	69.1818046097124	63.1220276536875	51.671650347061	22.9016081211081	0
77.3688697578915	77.1396311705464	76.3973865983442	75.0275154988601	72.7878001941913	69.1850244837621	63.1260019421639	51.6771743414222	22.9119817631614	0
77.3711245958291	77.141913268819	76.399754586811	75.0300421873499	72.7905890639465	69.1882441471411	63.1299759434676	51.6826978469642	22.9223539211067	0
77.3733792958692	77.1441952281818	76.4021224315438	75.0325687217344	72.7933777600093	69.1914635998547	63.1339496575992	51.6882208637057	22.9327245951801	0
77.3756338580624	77.1464770486807	76.40449013258	75.0350951020404	72.7961662823951	69.1946828419085	63.1379230845592	51.6937433916657	22.9430937856182	0
77.3778882824592	77.1487587303611	76.4068576899567	75.0376213282944	72.7989546311193	69.1979018733079	63.1418962243484	51.6992654308633	22.9534614926578	0
77.3801425691098	77.1510402732685	76.4092251037111	75.040147400523	72.8017428061974	69.2011206940584	63.1458690769675	51.7047869813174	22.9638277165359	0
77.3823967180643	77.1533216774481	76.41159237388	75.0426733187528	72.8045308076444	69.2043393041653	63.1498416424171	51.7103080430475	22.9741924574898	0
77.3846507293726	77.1556029429448	76.4139595005002	75.0451990830099	72.8073186354757	69.2075577036341	63.1538139206982	51.7158286160727	22.9845557157569	0
77.3869046030843	77.1578840698036	76.4163264836084	75.0477246933205	72.8101062897064	69.2107758924702	63.1577859118114	51.7213487004125	22.994917491575	0
77.3891583392488	77.160165058069	76.418693323241	75.0502501497109	72.8128937703516	69.213993870679	63.1617576157578	51.7268682960864	23.005277785182	0
77.3914119379154	77.1624459077855	76.4210600194342	75.0527754522069	72.8156810774263	69.2172116382658	63.1657290325381	51.7323874031139	23.0156365968162	0
77.3936653991332	77.1647266189973	76.4234265722243	75.0553006008344	72.8184682109455	69.2204291952359	63.1697001621533	51.7379060215149	23.0259939267158	0
77.3959187229509	77.1670071917486	76.4257929816472	75.0578255956192	72.8212551709239	69.2236465415948	63.1736710046045	51.7434241513089	23.0363497751196	0
77.3981719094171	77.1692876260832	76.4281592477388	75.0603504365868	72.8240419573766	69.2268636773478	63.1776415598925	51.748941792516	23.0467041422664	0
77.4004249585803	77.1715679220448	76.4305253705347	75.062875123763	72.8268285703181	69.2300806025001	63.1816118280184	51.754458945156	23.0570570283953	0
77.4026778704887	77.173848079677	76.4328913500705	75.0653996571729	72.8296150097633	69.233297317057	63.1855818089834	51.7599756092491	23.0674084337457	0
77.4049306451903	77.1761280990231	76.4352571863816	75.0679240368421	72.8324012757268	69.2365138210239	63.1895515027886	51.7654917848154	23.0777583585571	0
77.4071832827328	77.1784079801262	76.4376228795031	75.0704482627957	72.835187368223	69.2397301144061	63.193520909435	51.7710074718751	23.0881068030693	0
77.4094357831641	77.1806877230293	76.4399884294703	75.0729723350587	72.8379732872667	69.2429461972087	63.197490028924	51.7765226704486	23.0984537675222	0
77.4116881465314	77.1829673277753	76.4423538363179	75.0754962536562	72.8407590328721	69.246162069437	63.2014588612566	51.7820373805562	23.1087992521562	0
77.4139403728819	77.1852467944067	76.4447191000809	75.0780200186131	72.8435446050538	69.2493777310963	63.2054274064343	51.7875516022186	23.1191432572115	0
77.4161924622627	77.187526122966	76.4470842207938	75.0805436299541	72.846330003826	69.2525931821919	63.2093956644583	51.7930653354562	23.1294857829289	0
77.4184444147206	77.1898053134954	76.4494491984912	75.0830670877039	72.849115229203	69.2558084227288	63.2133636353299	51.7985785802899	23.1398268295493	0
77.4206962303023	77.1920843660371	76.4518140332073	75.0855903918871	72.8519002811989	69.2590234527123	63.2173313190505	51.8040913367402	23.1501663973137	0
77.4229479090541	77.1943632806329	76.4541787249764	75.088113542528	72.8546851598281	69.2622382721475	63.2212987156216	51.8096036048283	23.1605044864634	0
77.4251994510224	77.1966420573245	76.4565432738325	75.0906365396512	72.8574698651045	69.2654528810398	63.2252658250445	51.8151153845749	23.17084109724	0
77.427450856253	77.1989206961535	76.4589076798095	75.0931593832807	72.8602543970422	69.2686672793941	63.2292326473208	51.8206266760011	23.1811762298852	0
77.429702124792	77.2011991971613	76.4612719429413	75.0956820734408	72.8630387556551	69.2718814672156	63.2331991824519	51.8261374791281	23.1915098846409	0
77.431953256685	77.2034775603891	76.4636360632613	75.0982046101554	72.8658229409572	69.2750954445096	63.2371654304395	51.8316477939771	23.2018420617493	0
77.4342042519774	77.2057557858779	76.4660000408032	75.1007269934486	72.8686069529623	69.2783092112811	63.241131391285	51.8371576205694	23.2121727614528	0
77.4364551107145	77.2080338736685	76.4683638756001	75.1032492233442	72.8713907916842	69.2815227675351	63.2450970649902	51.8426669589263	23.2225019839939	0
77.4387058329414	77.2103118238018	76.4707275676854	75.1057712998658	72.8741744571366	69.2847361132769	63.2490624515567	51.8481758090694	23.2328297296154	0
77.440956418703	77.212589636318	76.473091117092	75.1082932230371	72.8769579493333	69.2879492485115	63.2530275509862	51.8536841710202	23.2431559985603	0
77.4432068680441	77.2148673112577	76.4754545238529	75.1108149928816	72.8797412682877	69.2911621732439	63.2569923632803	51.8591920448004	23.2534807910718	0
77.445457181009	77.2171448486609	76.4778177880008	75.1133366094227	72.8825244140136	69.2943748874792	63.2609568884409	51.8646994304316	23.2638041073933	0
77.4477073576423	77.2194222485677	76.4801809095683	75.1158580726838	72.8853073865244	69.2975873912225	63.2649211264698	51.8702063279357	23.2741259477684	0
77.449957397988	77.2216995110179	76.482543888588	75.1183793826881	72.8880901858335	69.3007996844788	63.2688850773687	51.8757127373346	23.2844463124409	0
77.4522073020901	77.2239766360512	76.4849067250922	75.1209005394586	72.8908728119543	69.3040117672531	63.2728487411396	51.8812186586503	23.2947652016548	0
77.4544570699923	77.226253623707	76.4872694191131	75.1234215430185	72.8936552649002	69.3072236395505	63.2768121177843	51.8867240919049	23.3050826156543	0
77.4567067017384	77.2285304740247	76.4896319706828	75.1259423933906	72.8964375446844	69.3104353013759	63.2807752073048	51.8922290371204	23.3153985546839	0
77.4589561973716	77.2308071870435	76.4919943798331	75.1284630905977	72.8992196513202	69.3136467527343	63.284738009703	51.8977334943192	23.325713018988	0
77.4612055569353	77.2330837628023	76.494356646596	75.1309836346625	72.9020015848206	69.3168579936307	63.2887005249809	51.9032374635235	23.3360260088117	0
77.4634547804724	77.23536020134	76.496718771003	75.1335040256078	72.904783345199	69.32006902407	63.2926627531406	51.9087409447557	23.3463375243997	0
77.4657038680259	77.2376365026952	76.4990807530857	75.1360242634559	72.9075649324681	69.3232798440573	63.2966246941841	51.9142439380383	23.3566475659974	0
77.4679528196384	77.2399126669065	76.5014425928755	75.1385443482294	72.9103463466411	69.3264904535974	63.3005863481134	51.9197464433939	23.3669561338501	0
77.4702016353524	77.2421886940121	76.5038042904037	75.1410642799505	72.9131275877309	69.3297008526952	63.3045477149308	51.925248460845	23.3772632282034	0
77.4724503152103	77.2444645840503	76.5061658457013	75.1435840586415	72.9159086557505	69.3329110413558	63.3085087946384	51.9307499904145	23.3875688493031	0
77.4746988592543	77.2467403370591	76.5085272587993	75.1461036843245	72.9186895507125	69.336121019584	63.3124695872384	51.9362510321251	23.3978729973952	0
77.4769472675262	77.2490159530763	76.5108885297286	75.1486231570216	72.9214702726298	69.3393307873846	63.316430092733	51.9417515859997	23.4081756727257	0
77.4791955400679	77.2512914321396	76.51324965852	75.1511424767546	72.9242508215151	69.3425403447626	63.3203903111244	51.9472516520612	23.4184768755411	0
77.4814436769211	77.2535667742865	76.515610645204	75.1536616435455	72.9270311973811	69.3457496917229	63.324350242415	51.9527512303327	23.4287766060879	0
77.4836916781271	77.2558419795545	76.517971489811	75.156180657416	72.9298114002404	69.3489588282703	63.3283098866071	51.9582503208372	23.4390748646127	0
77.4859395437272	77.2581170479807	76.5203321923715	75.1586995183878	72.9325914301056	69.3521677544096	63.332269243703	51.9637489235981	23.4493716513626	0
77.4881872737626	77.2603919796023	76.5226927529156	75.1612182264823	72.9353712869891	69.3553764701457	63.3362283137051	51.9692470386385	23.4596669665845	0
77.4904348682741	77.262666774456	76.5250531714733	75.1637367817212	72.9381509709034	69.3585849754835	63.3401870966159	51.9747446659818	23.4699608105259	0
77.4926823273025	77.2649414325786	76.5274134480747	75.1662551841256	72.9409304818609	69.3617932704276	63.3441455924377	51.9802418056514	23.4802531834341	0
77.4949296508884	77.2672159540068	76.5297735827494	75.168773433717	72.943709819874	69.365001354983	63.3481038011731	51.9857384576708	23.4905440855567	0
77.4971768390722	77.2694903387769	76.5321335755273	75.1712915305166	72.9464889849549	69.3682092291544	63.3520617228246	51.9912346220636	23.5008335171417	0
77.4994238918941	77.2717645869253	76.5344934264378	75.1738094745454	72.9492679771159	69.3714168929467	63.3560193573947	51.9967302988534	23.511121478437	0
77.5016708093942	77.2740386984879	76.5368531355104	75.1763272658244	72.9520467963691	69.3746243463645	63.3599767048859	52.002225488064	23.5214079696907	0
77.5084107503617	77.280860214021	76.5439314119931	75.1838797233714	72.9603822168037	69.384245444419	63.371847024913	52.018708130459	23.5522586256875	0
