# Supplementary material for: A model of aerosol evaporation kinetics in a thermodenuder
Source: Copernicus journal article supplement (doi:10.5194/amt-3-579-2010), 2010-05-11
Supplement: Supplementary file 1 [file amt-3-579-2010-supplement.zip › Figure 7 Data.txt]

Td	MFR_60sec_100ug	MFR_30sec_100ug	MFR_15sec_100ug	MFR_15sec_10ug	MFR_30sec_10ug	MFR_60sec_10ug	MFR_60sec_500ug	MFR_30sec_500ug	MFR_15sec_500ug
25	1	1	1	1	1	1	1	1	1
29	0.991338528881176	0.992020762781052	0.993804356899077	0.989460768325646	0.980248391735539	0.96512740587709	0.99825532492522	0.998254758019499	0.998264022732658
33	0.975716675288266	0.977738465760711	0.982820250776756	0.971137674025704	0.946082556474111	0.905205909146566	0.995105748953411	0.995102690982531	0.995130696828445
37	0.947990603861984	0.952587220520102	0.963636606128751	0.939789308361684	0.888307864629795	0.80572156485488	0.989507058165688	0.989498179164644	0.989563371731386
41	0.899571651936736	0.909084253990514	0.930719646052988	0.887395075003389	0.794082390287766	0.650775053212906	0.979704763155868	0.979683550761074	0.979820939777696
45	0.816454505650368	0.835432331103295	0.875441460402336	0.80278492865111	0.649880431844155	0.443577221806273	0.962791301086366	0.962745737704083	0.963022154524255
49	0.676879278006576	0.714502549967477	0.785298213165164	0.673691813308398	0.458250387773381	0.233807058653482	0.934014069962761	0.933923335903601	0.934469359213979
53	0.454870755576514	0.528235756412364	0.64531661678464	0.4981526383342	0.263205614721909	0.0633566087610828	0.88570573268835	0.885536940821933	0.886620864716157
57	0.174406520552889	0.296986755605059	0.451428078580047	0.312932849305943	0.0919814532484134	0.000805960112789671	0.805647927664902	0.805359129755653	0.807585639677563
61	0.00436330971034545	0.0812033964204032	0.244791023859195	0.137672672838015	0.00650883100500891	0	0.674583760648741	0.674169338599248	0.679156095687897
65	0	0.000496352356872992	0.0696030415025039	0.0244952457066678	0	0	0.462381444704854	0.462375164277041	0.476363826636963
69	0	0	0.00130767203564399	6.07772999387032e-08	0	0	0.12591098429099	0.146196672525772	0.202511435762257
72							0	0.000723504079919868	0.035006194115019
75							0	0	0
78							0	0	0
81							0	0	0
84							0	0	0
