# Supplementary material for: A model of aerosol evaporation kinetics in a thermodenuder
Source: Copernicus journal article supplement (doi:10.5194/amt-3-579-2010), 2010-05-11
Supplement: Supplementary file 1 [file amt-3-579-2010-supplement.zip › Figure 8a Data.txt]

Td	MFR_1000	MFR_100	MFR_10	MFR_1	MFR_01	MFR_001	MFR_0001
25	0.00601992032283988	0.543249961102079	0.942849018597312	0.994182141397075	0.999319052381547	0.999931890957805	0.999994210296295
30	0	0.25450064246365	0.874799269440468	0.987023581983318	0.998608269508915	0.999860797031289	0.99998779504236
35	0	0.0276882696253722	0.74765159217383	0.972875459934699	0.9971353226903	0.999713385888582	0.999974578663596
40	0	0	0.535144494165161	0.94539630533863	0.994187269060179	0.999418009477328	0.999947873898932
45	0	0	0.280230585285775	0.893402364024193	0.988433595245275	0.998840218726534	0.999895784350125
50	0	0	0.0599198112930372	0.798837952128182	0.977376095038299	0.997724836433188	0.99979687330401
55	0		0	0.638756992563246	0.957057015900041	0.995657665537561	0.999608702569446
60	0		0	0.416242592607455	0.919408417912919	0.991762206145983	0.999265298780297
65	0			0.186689094334889	0.856224768753856	0.985012528651737	0.998645082101222
70	0			0.0261331258057424	0.750825363858693	0.972986326273157	0.997543069228155
75	0			0	0.594523944857602	0.952140012775645	0.995656428790303
80	0				0.410682447076637	0.917081229465295	0.992407584659469
85	0				0.210451465024071	0.859046556759933	0.986923812859865
90	0				0.0561503131990734	0.770632785243301	0.977957457285204
95	0				0.000409194677241764	0.641199934224975	0.963256947472264
100	0				0	0.485372190095243	0.939761570645183
105	0					0.310219957102272	0.903036463757709
110	0					0.145437975732266	0.846853663669692
115	0					0.0317644882856751	0.763764237533867
120	0					3.36272993710437e-05	0.64697449029383
125	0					0	0.498349794801273
130	0						0.34832775017271
135	0						0.193421975147955
140	0						0.0705168055551405
145	0						0.00709335964357004
150	0						0
