# Supplementary material for: A model of aerosol evaporation kinetics in a thermodenuder
Source: Copernicus journal article supplement (doi:10.5194/amt-3-579-2010), 2010-05-11
Supplement: Supplementary file 1 [file amt-3-579-2010-supplement.zip › Figure 8b Data.txt]

Td	MFR_120kJ	MFR_60kJ	MFR_80kJ	MFR_100kJ	MFR_140kJ	MFR_40kJ	MFR_160kJ
25	0.993206432685467	0.994221310101663	0.993206432685467	0.993206432685467	0.993206432685467	0.994221310101663	0.994221310101663
30	0.9861426198471	0.991709632718477	0.989182163349591	0.9877626969644	0.984293814682488	0.992693713719005	0.984260508759822
35	0.971587780829814	0.988207130212715	0.982757930771659	0.977887759687579	0.963445497620457	0.990821404000717	0.957918682367509
40	0.942803034352912	0.983361320236772	0.972806377947926	0.960587751899186	0.917032228802663	0.988533929664772	0.891234275367085
45	0.888012804597873	0.976856162130404	0.957691005427728	0.931083199188985	0.819550507292883	0.985818154018888	0.736721275524984
50	0.78834534082654	0.96828495079257	0.934905411162167	0.881775959264147	0.636104958101942	0.982644623197661	0.448989129553599
55	0.628100652860516	0.956687387501105	0.902108334587314	0.804306244371274	0.387056425394066	0.978780582176778	0.131143262502247
60	0.421499331723848	0.941841155672799	0.853618175958396	0.685421914334972	0.122685093252648	0.974378902840183	4.50289446862643e-06
65	0.202286264214654	0.922612855488222	0.789920280407212	0.537920501471511	0.00148576405122639	0.969221271476215	0
70	0.0374034861746952	0.897854022217239	0.703544710800442	0.370300522036527	0	0.96315098466336	0
75	0	0.867739698866391	0.596387200368357	0.197362787958593	0	0.956521477602076	
80	0	0.829779843869683	0.481488735498378	0.0610540054308693	0	0.948776909416151	
85	0	0.782720514109032	0.353017135950542	0.00223445612839465	0	0.939734215237092	
90	0	0.727848748182332	0.230694108401475	0	0	0.930015296503531	
95	0	0.661691358046915	0.119747357842816	0	0	0.918521778929624	
100	0	0.586331354850671	0.0399798510084546	0	0	0.905596646952979	
105	0	0.505807569787941	0.00367676924904279	0	0	0.891674356306043	
110	0	0.424400818693888	0	0	0	0.875697357549161	
115	0	0.346647467838383	0	0	0	0.85800720681327	
120	0	0.266085190974919	0	0	0	0.838520439126594	
125	0	0.190140010183795	0	0	0	0.817166682560201	
130	0	0.127527348387959	0	0	0	0.79647249040715	
135	0	0.0723269217613245	0	0	0	0.771623753325074	
140	0	0.0323168578541664	0	0	0	0.744851195880352	
145	0	0.00898569524026555	0	0	0	0.71618487065663	
150	0	0.000607214987119095	0	0	0	0.68569736598143	
