# Supplementary material for: A model of aerosol evaporation kinetics in a thermodenuder
Source: Copernicus journal article supplement (doi:10.5194/amt-3-579-2010), 2010-05-11
Supplement: Supplementary file 1 [file amt-3-579-2010-supplement.zip › Figure 8c Data.txt]

Csat	T50inv_120kJ_300nm	T50inv_faulhaber	T50inv_150kJ_200nm
100	0.00334840113845639	0.00337512316403426	0.00337097589752233
10	0.00318319274232055	0.00325273912291322	0.00325044693645376
1	0.0030243459851807	0.00313035508179219	0.00311866521128957
0.1	0.00285591889190347	0.00300797104067115	0.00298373862449649
0.01	0.00268708853956738	0.00288558699955011	0.0028534741047225
0.001	0.00251161622504081	0.00276320295842907	0.0027214587018642
0.0001		0.00264081891730804	0.00258832664682283
