# Supplementary material for: A model of aerosol evaporation kinetics in a thermodenuder
Source: Copernicus journal article supplement (doi:10.5194/amt-3-579-2010), 2010-05-11
Supplement: Supplementary file 1 [file amt-3-579-2010-supplement.zip › Figure 8d Data.txt]

DH	T50_DH
40	177
50	130
60	104
80	79
100	66
120	57
140	52
160	49.2
