# Supplementary material for: A model of aerosol evaporation kinetics in a thermodenuder
Source: Copernicus journal article supplement (doi:10.5194/amt-3-579-2010), 2010-05-11
Supplement: Supplementary file 1 [file amt-3-579-2010-supplement.zip › Figure 9 Data.txt]

T50_50_5	T50_250_5	T50_150_5	dp	T50_5_5	T50_5_01	T50_50_01	T50_150_01	T50_250_01
42.75	58.2	52.6	100	36.1	71.8	80.7	93.5	100.1
47.2	57	52.7	200	44.1	82.75	86.7	93.5	98.8
51.7	58	55	300	50	90.6	92.5	96.2	99.8
55.75	59.9	57.9	400	54.7	96.8	98	100.5	103
59.3	62.3	60.9	500	58.5	101.8	102.6	104.5	106.5
