# Supplementary material for: A model of aerosol evaporation kinetics in a thermodenuder
Source: Copernicus journal article supplement (doi:10.5194/amt-3-579-2010), 2010-05-11
Supplement: Supplementary file 1 [file amt-3-579-2010-supplement.zip › Figure 10 Data.txt]

Di	T50_300_5	T50_300_250	T50_100_5
7.5e-06	54.8	69.2	39.4
6.5e-06	55.5	69.5	39.6
5.5e-06	56.6	69.9	40
4.5e-06	58.2	70.7	40.6
3.5e-06	60.2	71.8	41.4
2.5e-06	63.4	73.4	42.8
1.5e-06	69.3	76.8	45.7
