# Supplementary material for: A model of aerosol evaporation kinetics in a thermodenuder
Source: Copernicus journal article supplement (doi:10.5194/amt-3-579-2010), 2010-05-11
Supplement: Supplementary file 1 [file amt-3-579-2010-supplement.zip › Figure 11 Data.txt]

TarrayForTD	MFR_f0	MFR_f01	MFR_f02	MFR_f03	MFR_f04	MFR_f05	MFRnv_f05	MFRnv_f04	MFRnv_f03	MFRnv_f02	MFRnv_f01
25	0.992575164756151	0.991755227258639	0.990731710627542	0.989418047504185	0.987670481836844	0.985231498195065	0.992629452234992	0.99262002471866	0.992610079919718	0.992599462246372	0.992587808451065
28	0.984900944079098	0.9833227331226	0.98137589329612	0.978914066581941	0.975701468007149	0.971332060855671	0.985756891205067	0.985605375963135	0.985445312553169	0.985275386930834	0.985091516101483
31	0.97338185316822	0.970662612814553	0.967325655078226	0.963134070188004	0.957712480876327	0.95042909976171	0.975469568104953	0.975103268749062	0.974715271586785	0.974301860285921	0.973852280507948
34	0.956176529201766	0.951747954130943	0.946327219728233	0.939540726530649	0.930801989041801	0.919136958588332	0.960178133830299	0.959486225377185	0.958750333145053	0.957961594133911	0.957096662874916
37	0.930704382857721	0.923735507191279	0.915215525842161	0.904565704562075	0.89088198554249	0.872673795792941	0.937715151457329	0.936529385002569	0.935260583195636	0.933888637891663	0.9323652460117
40	0.893457811212604	0.882754909806422	0.869674301394394	0.853331677395252	0.832348383036237	0.804458550980929	0.905261034125965	0.903327976402968	0.90124153525172	0.898956813836646	0.896373778392078
43	0.839910072082914	0.823798446697272	0.804101382511633	0.779483494990878	0.747862347243378	0.705815322486401	0.859430739800374	0.856376868251258	0.853041245528849	0.849324537030988	0.845015505792685
46	0.76480391540621	0.741020093261174	0.711915564111587	0.675497023033275	0.628648691752539	0.566234429926614	0.796757226358429	0.792063838072325	0.786858769946322	0.780926555557074	0.773813016042139
49	0.663465721711097	0.629144660910808	0.587071766703377	0.534310691693425	0.484291532916506	0.430065376476432	0.714846508310902	0.707892361499321	0.700046855702703	0.690868839395483	0.6793970870572
52	0.535920919080197	0.487930097184976	0.446591203553784	0.40048633191836	0.341319395328293	0.27216684265626	0.614300499026479	0.604582875634661	0.593461622604675	0.580156876961887	0.562881266378596
55	0.397287909882565	0.354676561929499	0.302931408575531	0.248007639694703	0.19154960244574	0.129519145732699	0.500372333272885	0.487877612369118	0.473500330608828	0.456170248608106	0.433482374688067
58	0.260124433349508	0.210784048693658	0.162159384787129	0.1132972938469	0.064927101665326	0.0208575333558345	0.382367481308174	0.367623572337401	0.350656962076362	0.330192759197394	0.303391148506859
61	0.133336870745694	0.08969296490268	0.0505657136062492	0.0169289570307603	1.36433896096779e-05	2.39050851115149e-05	0.271408948726365	0.255270861035237	0.236690462683141	0.214184399757161	0.18429895010158
64	0.041749693001358	0.0119992492155109	6.49232408316389e-06	1.21374023347432e-05	2.1670395995174e-05	3.84888531004184e-05	0.179433400126334	0.163291017512419	0.144846780321748	0.122694768407956	0.0935277987048091
67	0.00274448349597622	4.16057108020648e-06	9.78709522067444e-06	1.89685650773638e-05	3.38182638308648e-05	5.91492491446565e-05	0.115642823151081	0.101142802801698	0.0849584690201232	0.0661540278403828	0.0426172164870345
70	0	6.02454898601082e-06	1.50018909500767e-05	2.8805089865253e-05	5.08668936598339e-05	8.89761453752627e-05	0.0804150232251189	0.0684243518930007	0.0555063552322647	0.0412636841204226	0.0248783711772805
