# Supplementary material for: A model of aerosol evaporation kinetics in a thermodenuder
Source: Copernicus journal article supplement (doi:10.5194/amt-3-579-2010), 2010-05-11
Supplement: Supplementary file 1 [file amt-3-579-2010-supplement.zip › Figure 12 Data-1.txt]

Td	MFRbp	MFRh	MFRd
25	0.819185315021073	1	1
35	0.755179986899964	0.808313349695821	0.921867095335489
45	0.694664912776869	0.699437629690325	0.847994831009635
55	0.639213276040367	0.625798221975369	0.780303631326599
65	0.58555763705797	0.565111224978923	0.714804851015802
75	0.537008839623581	0.513797316587803	0.6555401198931
85	0.49197106772488	0.468610090418701	0.600561385444543
95	0.447030222740772	0.424907883387147	0.54570097210455
105	0.399355989535036	0.383797649599308	0.487503843406621
115	0.360280995575899	0.346423686090559	0.439804021104347
125	0.323651878150327	0.3103066563812	0.395089941452383
135	0.285933061676314	0.274346321441399	0.349045638921102
145	0.247450484460902	0.240170413140361	0.302068994552883
155	0.215275444347569	0.208643808666096	0.262792118462269
165	0.184836685414003	0.178540015127805	0.225634764228223
175	0.154192430671256	0.14861083485302	0.18822655612093
185	0.123660761619895	0.119309318678013	0.150955784182623
195	0.0951749204847211	0.0920913374147231	0.116182405543089
