# Supplementary material for: A model of aerosol evaporation kinetics in a thermodenuder
Source: Copernicus journal article supplement (doi:10.5194/amt-3-579-2010), 2010-05-11
Supplement: Supplementary file 1 [file amt-3-579-2010-supplement.zip › Figure 12 Data-2.txt]

Td
25
35
45
55
65
75
85
95
105
115
125
135
145
155
165
175
185
195

MFRbp_compounds
0.151664330245984	0.642706465101045	0.967012876194867	0.981414062865073	0.994759369301128	0.999473673186506	0.999947344574478
0.121612317059318	0.35851592081867	0.848874779052826	0.967180215786541	0.99328983254974	0.999325749158812	0.999932542416046
0.105184085777767	0.179259130725815	0.654834565741313	0.93670983802039	0.990042627274597	0.998997827114744	0.99989971796652
0.0939718070375574	0.116051289431266	0.410651156458323	0.87482858421971	0.982975337233657	0.998278976425192	0.999827710217868
0.0837349742570476	0.0933275321761037	0.196270409562574	0.762812075082372	0.968242503020198	0.996757254920825	0.999675042378499
0.0750050318093146	0.0805621068350292	0.080040929061662	0.593019416902156	0.939170121674569	0.993658552422484	0.999363166866716
0.0649642178378778	0.0714357242187622	0.0465629046056809	0.390538895172943	0.885576949225172	0.987581271466958	0.998747566367109
0.053072308844961	0.0636592268197878	0.0377138121479894	0.206782078926216	0.795716589705084	0.976154743211191	0.997575778172986
0.00771838115479828	0.0561030955153344	0.0324372659888245	0.0867622501833013	0.662818668410026	0.955545710667951	0.995413511835638
0.000259877736872289	0.0480465198731618	0.0287322661634352	0.0381541354996976	0.496346097932283	0.92007290438577	0.991534245218547
0.000249965951140626	0.0433251434270448	0.0257528286903946	0.0260234029821745	0.32399208628725	0.862511844778542	0.984767078008273
0.000238368812049425	0.0307033233998812	0.0230604090790892	0.0219301953035322	0.177220652830618	0.77601359912691	0.973300645332477
0.00022409555887848	0.000823226509831097	0.020561779831208	0.0190792924431521	0.0797509589708029	0.658135521199079	0.954388338411099
0.000212575817723011	2.44583839757678e-05	0.0159028746386557	0.0168073330457849	0.0343560957417014	0.516277194692847	0.924052101791858
0.00020086022527487	2.311020550886e-05	0.0142413025926847	0.0148268702875752	0.0201425240551544	0.367850881853991	0.877176156599963
0.000187278953561945	2.15393938523502e-05	0.0110038343516989	0.0129545525065855	0.0157636611293332	0.231498295908138	0.80842247210208
0.000171188800784483	1.96977837253218e-05	0.00477666107501774	0.0110923984621835	0.0130246158451278	0.123174915421598	0.713770553776481
0.00015367333733371	1.76881445288343e-05	4.71345309090075e-06	0.00831099950625466	0.0105643910937795	0.0537669890032721	0.593717464162088
