# Supplementary material for: A model of aerosol evaporation kinetics in a thermodenuder
Source: Copernicus journal article supplement (doi:10.5194/amt-3-579-2010), 2010-05-11
Supplement: Supplementary file 1 [file amt-3-579-2010-supplement.zip › Supplemental Material Text.pdf]

## Supplementary Material for “A model of aerosol evaporation kinetics in a thermodenuder” by C. D. Cappa<sup>1</sup>

[1] Dept. of Civil and Environmental Engineering, University of California, Davis, California

Correspondence to: C. D. Cappa ([cdcappa@ucdavis.edu](mailto:cdcappa@ucdavis.edu))

### Influence of the number of bins

The TD model described in the main text requires the user to specify some number of bins,  $n$ , that defines the number of concentric cylinders that the system is divided into. A choice of  $n = 10$  provides a reasonable tradeoff between overall accuracy and computational speed. Only very small changes are found in the calculated mass fraction remaining (MFR) values for  $n > 10$ . However, when smaller values of  $n$  are used the calculated MFR is greater at a given temperature, indicating less overall evaporation occurred. Results are shown in Figure S1 for calculations performed using  $C_{sat} = 1 \mu\text{g}/\text{m}^3$ ,  $C_{OA} = 10 \mu\text{g}/\text{m}^3$ ,  $\Delta H_{vap} = 120 \text{ kJ}/\text{mol}$ ,  $d_p = 200 \text{ nm}$ ,  $D_i = 3 \times 10^{-6} \text{ m}^2/\text{s}$ ,  $t_{res} = 15 \text{ seconds}$  and the adsorbent denuder boundary condition (Case 1 in the main text). Only very small differences in the calculated  $MFR_{bp}$  are found for  $n \geq 10$ .

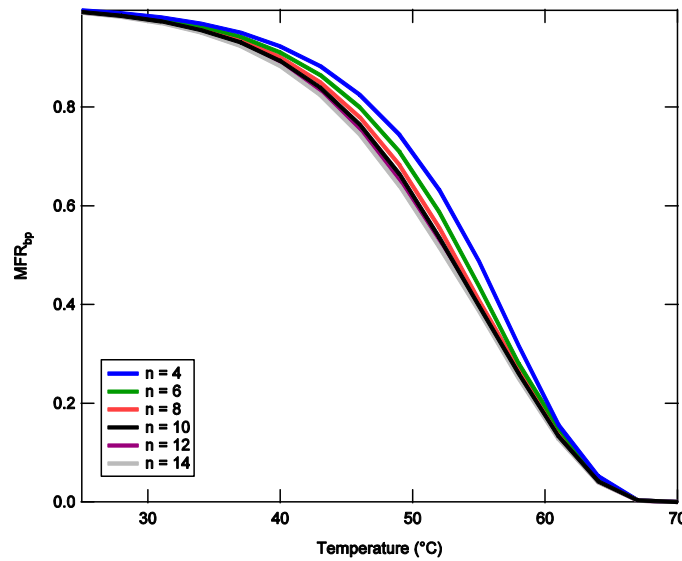

**Figure S1:** The calculated  $MFR_{bp}$  for different numbers of bins,  $n$ .

## Description of Data from Figures

To facilitate comparison with other models and data sets the data from Figures 2-11 has been provided as individual text files. The specific data provided in each file for each figure is described in the tables below.

### Figure 2 (“Figure 2 Data.txt”)

The observations were taken from Faulhaber et al. (2009). The calculations were performed using the parameters given in Table S1. The data from the figure are included as a separate tab delimited file.

|                                        | Butanedioic Acid |       |         | Hexanedioic Acid |      |         | Decanedioic Acid |       |         |
|----------------------------------------|------------------|-------|---------|------------------|------|---------|------------------|-------|---------|
|                                        | Cappa            | C&Z   | Average | Cappa            | C&Z  | Average | Cappa            | C&Z   | Average |
| $C_{sat}$ ( $\mu\text{g}/\text{m}^3$ ) | 1.5              | 6.5   | 3.1     | 0.14             | 1.78 | 0.5     | 0.0012           | 0.12  | 0.012   |
| $\Delta H_{vap}$ (kJ/mol)              | 128              | 119.5 | 124     | 145.4            | 146  | 146     | 180              | 146.5 | 163     |

**Table S-1.** Thermodynamic parameters for the three dicarboxylic acids used to perform the calculations in Figure 2. “Cappa” = Cappa et al. (2007); C&Z = Chattopadhyay and Ziemann (2005).

| Name          | Description                                                                    |
|---------------|--------------------------------------------------------------------------------|
| T_But_Exp     | $T_d$ ( $^{\circ}\text{C}$ ) for butanedioic acid from Faulhaber et al. (2009) |
| MFR_But_Exp   | MFR for butanedioic acid from Faulhaber et al. (2009)                          |
| T_Hex_Exp     | $T_d$ ( $^{\circ}\text{C}$ ) for hexanedioic acid from Faulhaber et al. (2009) |
| MFR_Hex_Exp   | MFR for hexanedioic acid from Faulhaber et al. (2009)                          |
| T_Dec_Exp     | $T_d$ ( $^{\circ}\text{C}$ ) for decanedioic acid from Faulhaber et al. (2009) |
| MFR_Dec_Exp   | MFR for decanedioic acid from Faulhaber et al. (2009)                          |
| Td            | Model $T_d$ ( $^{\circ}\text{C}$ )                                             |
| MFR_But_Cappa | Model $\text{MFR}_{bp}$ for butanedioic acid using Cappa et al. thermo         |
| MFR_But_Chat  | Model $\text{MFR}_{bp}$ for butanedioic acid using C&Z thermo                  |
| MFR_But_Mean  | Model $\text{MFR}_{bp}$ for butanedioic acid using Cappa and C&Z mean thermo   |
| MFR_Hex_Cappa | Model $\text{MFR}_{bp}$ for hexanedioic acid using Cappa et al. thermo         |
| MFR_Hex_Chat  | Model $\text{MFR}_{bp}$ for hexanedioic acid using C&Z thermo                  |
| MFR_Hex_mean  | Model $\text{MFR}_{bp}$ for hexanedioic acid using Cappa and C&Z mean thermo   |
| MFR_Dec_Cappa | Model $\text{MFR}_{bp}$ for decanedioic acid using Cappa et al. thermo         |
| MFR_Dec_Chat  | Model $\text{MFR}_{bp}$ for decanedioic acid using C&Z thermo                  |
| MFR_Dec_mean  | Model $\text{MFR}_{bp}$ for decanedioic acid using Cappa and C&Z mean thermo   |

**Figure 3** (“Figure 3 Data.txt”)

| Name         | Description                               |
|--------------|-------------------------------------------|
| Td           | Model $T_d$ (°C)                          |
| MFR_Profile  | MFR <sub>bp</sub> using velocity profile  |
| MFR_constant | MFR <sub>bp</sub> using constant velocity |

**Figure 4** (“Figure 4 Data.txt”)

| Name                | Description                                                                |
|---------------------|----------------------------------------------------------------------------|
| Csat                | Saturation concentration, $C_{sat}$ (μg/m <sup>3</sup> )                   |
| Dp                  | Particle diameter, $d_p$ (nm)                                              |
| MFR_dp_low_loading  | MFR <sub>bp</sub> as function of $d_p$ at $C_{OA} = 5$ μg/m <sup>3</sup>   |
| ResidenceTime       | $t_{res}$ (s)                                                              |
| MFR_Csat            | MFR <sub>bp</sub> as function of $C_{sat}$                                 |
| MFR_dp_high_loading | MFR <sub>bp</sub> as function of $d_p$ at $C_{OA} = 150$ μg/m <sup>3</sup> |
| MFR_Time            | MFR <sub>bp</sub> as function of $t_{res}$                                 |

**Figure 5** (“Figure 5 Data.txt”)

| Name              | Description                                                                                            |
|-------------------|--------------------------------------------------------------------------------------------------------|
| Td                | Model $T_d$ (°C)                                                                                       |
| MFR_10_Absorbent  | MFR <sub>d</sub> at $C_{OA} = 10$ μg/m <sup>3</sup> for Case 1 (adsorbent denuder boundary condition)  |
| MFR_10_NoLoss     | MFR <sub>d</sub> at $C_{OA} = 10$ μg/m <sup>3</sup> for Case 3 (no loss boundary condition)            |
| MFR_10_Eqm        | MFR <sub>d</sub> at $C_{OA} = 10$ μg/m <sup>3</sup> for Case 2 (local equilibrium boundary condition)  |
| MFR_100_Absorbent | MFR <sub>d</sub> at $C_{OA} = 100$ μg/m <sup>3</sup> for Case 1 (adsorbent denuder boundary condition) |
| MFR_100_NoLoss    | MFR <sub>d</sub> at $C_{OA} = 100$ μg/m <sup>3</sup> for Case 3 (no loss boundary condition)           |
| MFR_100_Eqm       | MFR <sub>d</sub> at $C_{OA} = 100$ μg/m <sup>3</sup> for Case 2 (local equilibrium boundary condition) |
| MFR_500_Absorbent | MFR <sub>d</sub> at $C_{OA} = 500$ μg/m <sup>3</sup> for Case 1 (absorbent denuder boundary condition) |
| MFR_500_NoLoss    | MFR <sub>d</sub> at $C_{OA} = 500$ μg/m <sup>3</sup> for Case 3 (no loss boundary condition)           |
| MFR_500_Eqm       | MFR <sub>d</sub> at $C_{OA} = 500$ μg/m <sup>3</sup> for Case 2 (local equilibrium boundary condition) |

**Figure 6** (“Figure 6x Data.txt”)

The data in each file (e.g. “Figure 6x Data.txt”) comes from the corresponding panel x (e.g. x = a, b, c, etc.). “Distance” is the distance from the thermodenuder entrance (in cm). The other columns “Radius\_X\_Y” (where X indicates the loading condition, either “high” or “low,” and Y indicates boundary condition case) are in order from closest to the TD center to closest to the TD walls.

**Figure 7** (“Figure 7 Data.txt”)

| Name            | Description                                                                          |
|-----------------|--------------------------------------------------------------------------------------|
| Td              | Model $T_d$ (°C)                                                                     |
| MFR_15sec_10ug  | MFR <sub>h</sub> at $t_{res} = 15$ seconds and $C_{OA} = 10 \mu\text{g}/\text{m}^3$  |
| MFR_30sec_10ug  | MFR <sub>h</sub> at $t_{res} = 30$ seconds and $C_{OA} = 10 \mu\text{g}/\text{m}^3$  |
| MFR_60sec_10ug  | MFR <sub>h</sub> at $t_{res} = 60$ seconds and $C_{OA} = 10 \mu\text{g}/\text{m}^3$  |
| MFR_15sec_100ug | MFR <sub>h</sub> at $t_{res} = 15$ seconds and $C_{OA} = 100 \mu\text{g}/\text{m}^3$ |
| MFR_30sec_100ug | MFR <sub>h</sub> at $t_{res} = 30$ seconds and $C_{OA} = 100 \mu\text{g}/\text{m}^3$ |
| MFR_60sec_100ug | MFR <sub>h</sub> at $t_{res} = 60$ seconds and $C_{OA} = 100 \mu\text{g}/\text{m}^3$ |
| MFR_15sec_500ug | MFR <sub>h</sub> at $t_{res} = 15$ seconds and $C_{OA} = 500 \mu\text{g}/\text{m}^3$ |
| MFR_30sec_500ug | MFR <sub>h</sub> at $t_{res} = 30$ seconds and $C_{OA} = 500 \mu\text{g}/\text{m}^3$ |
| MFR_60sec_500ug | MFR <sub>h</sub> at $t_{res} = 60$ seconds and $C_{OA} = 500 \mu\text{g}/\text{m}^3$ |

**Figure 8** (“Figure 8x Data.txt”), where x corresponds to the panel a, b, c or d

*Figure 8a*

| Name     | Description                                                    |
|----------|----------------------------------------------------------------|
| Td       | Model $T_d$ (°C)                                               |
| MFR_1000 | MFR <sub>bp</sub> for $C_{sat} = 1000 \mu\text{g}/\text{m}^3$  |
| MFR_100  | MFR <sub>bp</sub> for $C_{sat} = 100 \mu\text{g}/\text{m}^3$   |
| MFR_10   | MFR <sub>bp</sub> for $C_{sat} = 10 \mu\text{g}/\text{m}^3$    |
| MFR_1    | MFR <sub>bp</sub> for $C_{sat} = 1 \mu\text{g}/\text{m}^3$     |
| MFR_01   | MFR <sub>bp</sub> for $C_{sat} = 0.1 \mu\text{g}/\text{m}^3$   |
| MFR_001  | MFR <sub>bp</sub> for $C_{sat} = 0.01 \mu\text{g}/\text{m}^3$  |
| MFR_0001 | MFR <sub>bp</sub> for $C_{sat} = 0.001 \mu\text{g}/\text{m}^3$ |

*Figure 8b*

| Name      | Description                                                 |
|-----------|-------------------------------------------------------------|
| Td        | Model $T_d$ (°C)                                            |
| MFR_40kJ  | MFR <sub>bp</sub> for $\Delta H_{vap} = 40 \text{ kJ/mol}$  |
| MFR_60kJ  | MFR <sub>bp</sub> for $\Delta H_{vap} = 60 \text{ kJ/mol}$  |
| MFR_80kJ  | MFR <sub>bp</sub> for $\Delta H_{vap} = 80 \text{ kJ/mol}$  |
| MFR_100kJ | MFR <sub>bp</sub> for $\Delta H_{vap} = 100 \text{ kJ/mol}$ |
| MFR_120kJ | MFR <sub>bp</sub> for $\Delta H_{vap} = 120 \text{ kJ/mol}$ |
| MFR_140kJ | MFR <sub>bp</sub> for $\Delta H_{vap} = 140 \text{ kJ/mol}$ |
| MFR_160kJ | MFR <sub>bp</sub> for $\Delta H_{vap} = 160 \text{ kJ/mol}$ |

Figure 8c

| Name               | Description                                                                                     |
|--------------------|-------------------------------------------------------------------------------------------------|
| Csat               | Saturation concentration ( $\mu\text{g}/\text{m}^3$ )                                           |
| T50inv_120kJ_300nm | $1/T_{50}$ (in 1/K) for $\Delta H_{\text{vap}} = 120 \text{ kJ/mol}$ and $d_p = 300 \text{ nm}$ |
| T50inv_150kJ_200nm | $1/T_{50}$ (in 1/K) for $\Delta H_{\text{vap}} = 150 \text{ kJ/mol}$ and $d_p = 200 \text{ nm}$ |
| T50inv_faulhaber   | $1/T_{50}$ (in 1/K) from Faulhaber et al. (2009)                                                |

Figure 8d

| Name   | Description                                                |
|--------|------------------------------------------------------------|
| DH     | Enthalpy of vaporization, $\Delta H_{\text{vap}}$ (kJ/mol) |
| T50_DH | $T_{50}$ ( $^{\circ}\text{C}$ )                            |

Figure 9 (“Figure 9 Data.txt”)

| Name       | Description                                                                                                                 |
|------------|-----------------------------------------------------------------------------------------------------------------------------|
| dp         | Particle diameter, $d_p$ (nm)                                                                                               |
| T50_5_5    | $T_{50}$ ( $^{\circ}\text{C}$ ) for $C_{\text{sat}} = 5 \mu\text{g}/\text{m}^3$ and $C_{OA} = 5 \mu\text{g}/\text{m}^3$     |
| T50_50_5   | $T_{50}$ ( $^{\circ}\text{C}$ ) for $C_{\text{sat}} = 5 \mu\text{g}/\text{m}^3$ and $C_{OA} = 50 \mu\text{g}/\text{m}^3$    |
| T50_150_5  | $T_{50}$ ( $^{\circ}\text{C}$ ) for $C_{\text{sat}} = 5 \mu\text{g}/\text{m}^3$ and $C_{OA} = 150 \mu\text{g}/\text{m}^3$   |
| T50_250_5  | $T_{50}$ ( $^{\circ}\text{C}$ ) for $C_{\text{sat}} = 5 \mu\text{g}/\text{m}^3$ and $C_{OA} = 250 \mu\text{g}/\text{m}^3$   |
| T50_5_01   | $T_{50}$ ( $^{\circ}\text{C}$ ) for $C_{\text{sat}} = 0.1 \mu\text{g}/\text{m}^3$ and $C_{OA} = 5 \mu\text{g}/\text{m}^3$   |
| T50_50_01  | $T_{50}$ ( $^{\circ}\text{C}$ ) for $C_{\text{sat}} = 0.1 \mu\text{g}/\text{m}^3$ and $C_{OA} = 50 \mu\text{g}/\text{m}^3$  |
| T50_150_01 | $T_{50}$ ( $^{\circ}\text{C}$ ) for $C_{\text{sat}} = 0.1 \mu\text{g}/\text{m}^3$ and $C_{OA} = 150 \mu\text{g}/\text{m}^3$ |
| T50_250_01 | $T_{50}$ ( $^{\circ}\text{C}$ ) for $C_{\text{sat}} = 0.1 \mu\text{g}/\text{m}^3$ and $C_{OA} = 250 \mu\text{g}/\text{m}^3$ |

Figure 10 (“Figure 10 Data.txt”)

| Name        | Description                                                                   |
|-------------|-------------------------------------------------------------------------------|
| Di          | Diffusion coefficient, $D_i$ ( $\text{m}^2/\text{s}$ )                        |
| T50_300_5   | $T_{50}$ for $d_p = 300 \text{ nm}$ and $C_{OA} = 5 \mu\text{g}/\text{m}^3$   |
| T50_300_250 | $T_{50}$ for $d_p = 300 \text{ nm}$ and $C_{OA} = 250 \mu\text{g}/\text{m}^3$ |
| T50_100_5   | $T_{50}$ for $d_p = 100 \text{ nm}$ and $C_{OA} = 5 \mu\text{g}/\text{m}^3$   |

**Figure 11**

| TarrayForTD | Model $T_d$ (°C)                                                                                           |
|-------------|------------------------------------------------------------------------------------------------------------|
| MFR_f0      | MFR <sub>bp</sub> for a non-volatile core that is 0% of the total particle mass (panel a)                  |
| MFR_f01     | MFR <sub>bp</sub> for a non-volatile core that is 10% of the total particle mass (panel a)                 |
| MFR_f02     | MFR <sub>bp</sub> for a non-volatile core that is 20% of the total particle mass (panel a)                 |
| MFR_f03     | MFR <sub>bp</sub> for a non-volatile core that is 30% of the total particle mass (panel a)                 |
| MFR_f04     | MFR <sub>bp</sub> for a non-volatile core that is 40% of the total particle mass (panel a)                 |
| MFR_f05     | MFR <sub>bp</sub> for a non-volatile core that is 50% of the total particle mass (panel a)                 |
| MFRnv_f05   | MFR <sub>bp</sub> for a non-volatile absorptive component that is 50% of the total particle mass (panel b) |
| MFRnv_f04   | MFR <sub>bp</sub> for a non-volatile absorptive component that is 40% of the total particle mass (panel b) |
| MFRnv_f03   | MFR <sub>bp</sub> for a non-volatile absorptive component that is 30% of the total particle mass (panel b) |
| MFRnv_f02   | MFR <sub>bp</sub> for a non-volatile absorptive component that is 20% of the total particle mass (panel b) |
| MFRnv_f01   | MFR <sub>bp</sub> for a non-volatile absorptive component that is 10% of the total particle mass (panel b) |

**Figure 12**

“Figure 12 Data-1.txt”

| Name  | Description                    |
|-------|--------------------------------|
| Td    | Model $T_d$ (°C)               |
| MFRbp | MFR <sub>bp</sub> for total OA |
| MFRh  | MFR <sub>h</sub> for total OA  |
| MFRd  | MFR <sub>d</sub> for total OA  |

“Figure 12 Data-2.txt”

| Name            | Description                                                                                                                                                            |
|-----------------|------------------------------------------------------------------------------------------------------------------------------------------------------------------------|
| Td              | Model $T_d$ (°C)                                                                                                                                                       |
| MFRbp_compounds | MFR <sub>bp</sub> for individual compounds, in order from highest $C_{sat}$ (100 $\mu\text{g}/\text{m}^3$ ) to lowest $C_{sat}$ ( $10^{-3}$ $\mu\text{g}/\text{m}^3$ ) |

## References

Cappa, C. D., Lovejoy, E. R., and Ravishankara, A. R.: Determination of Evaporation Rates and Vapor Pressures of Very Low Volatility Compounds: A Study of the C4-C10 and C12 Dicarboxylic Acids, *J. Phys. Chem. A*, 111, 3099-3109, 2007.

Chattopadhyay, S., and Ziemann, P. J.: Vapor pressures of substituted and unsubstituted monocarboxylic and dicarboxylic acids measured using an improved thermal desorption particle beam mass spectrometry method, *Aerosol Sci. Technol.*, 39, 1085-1100, 2005.

Faulhaber, A. E., Thomas, B. M., Jimenez, J. L., Jayne, J. T., Worsnop, D., and Ziemann, P. J.: Characterization of a thermodenuderparticle beam mass spectrometer system for the study of organic aerosol volatility and composition, *Atmos. Meas. Tech.*, 2, 15-31, 2009.
